# Supplementary material for: Comprehensive Transcriptome Analysis Reveals Sex-Specific Alternative Splicing Events in Zebrafish Gonads
Source: Life (Basel). 2022 Sep 16;12(9):1441. doi: 10.3390/life12091441 (PMC9501657; doi:10.3390/life12091441)
Supplement: Supplementary file 1 [file life-12-01441-s001.zip]

Archive with 10 entries (10 files):
- Supplementary Figures R1.pdf
- Table S1.xlsx
- Table S2.xlsx
- Table S3.xlsx
- Table S4.xlsx
- Table S5 .xlsx
- Table S6.xlsx
- Table S7.xlsx
- Table S8.xlsx
- Table S9.xlsx
