# Supplementary material for: Comprehensive Transcriptome Analysis Reveals Sex-Specific Alternative Splicing Events in Zebrafish Gonads
Source: Life (Basel). 2022 Sep 16;12(9):1441. doi: 10.3390/life12091441 (PMC9501657; doi:10.3390/life12091441)
Supplement: Supplementary file 1 [file life-12-01441-s001.zip › Table S1.xlsx]

## Sheet: GSE142352_Ovary-upregulated
gene_id	baseMean	log2FoldChange	lfcSE	stat	pvalue	padj
gene-gmnn-2	769.411	-12.9629	1.52174	-8.51846	1.61687e-17	2.62069e-16
gene-tmprss4b	421.771	-12.0953	2.46564	-4.90554	9.31707e-07	4.41334e-06
gene-il13ra2-2	244.895	-11.3109	3.27636	-3.45229	0.000555845	0.00161618
gene-cx44.2-2	359.787	-10.4275	1.62201	-6.42875	1.2866e-10	1.03012e-09
gene-si:ch211-250e5.16-2	875.508	-10.1359	1.72476	-5.87671	4.18507e-09	2.78442e-08
gene-qdprb2-6	3932.13	-10.096	0.634976	-15.8998	6.35824e-57	9.98089e-55
gene-si:dkeyp-20e4.8	238.39	-9.78934	3.12493	-3.13266	0.0017323	0.00453032
gene-zglp1	1958.54	-9.71281	0.623038	-15.5894	8.58917e-55	1.22911e-52
gene-zgc:158494	1288.52	-9.68748	0.86439	-11.2073	3.75447e-29	1.46013e-27
gene-LOC100301575	427.742	-9.67185	1.39823	-6.91723	4.60547e-12	4.37587e-11
gene-si:dkeyp-98a7.7	1450.14	-9.63607	0.647735	-14.8765	4.6802e-50	5.3638e-48
gene-qdprb2-5	1988.25	-9.50143	2.336	-4.0674	4.75414e-05	0.000169844
gene-zgc:173556	10135.9	-9.40192	1.68045	-5.59488	2.20768e-08	1.33507e-07
gene-LOC100331909	346.825	-9.38265	1.20096	-7.81262	5.60115e-15	7.14658e-14
gene-si:ch1073-75o15.4	1461.37	-9.34248	1.92642	-4.84965	1.23681e-06	5.7689e-06
gene-LOC110439410	165.292	-9.30347	1.54178	-6.03425	1.59703e-09	1.12251e-08
gene-si:dkeyp-46h3.8	1633.7	-9.29215	0.550224	-16.888	5.51822e-64	1.25375e-61
gene-zgc:171670	3275.21	-9.24251	0.721473	-12.8106	1.43011e-37	9.07872e-36
gene-si:ch73-160p18.3	13771.2	-9.23756	1.31064	-7.04812	1.81356e-12	1.80111e-11
gene-LOC110437821	1335.85	-9.15903	0.613118	-14.9384	1.85238e-50	2.18084e-48
gene-si:dkey-46g23.2	19127.1	-9.12715	1.1482	-7.94907	1.8791e-15	2.51138e-14
gene-zgc:175135	7600.12	-9.11806	2.69819	-3.37932	0.000726642	0.00206277
gene-LOC100332505	16247.9	-9.07554	2.1074	-4.30651	1.6585e-05	6.43548e-05
gene-LOC110440097	7573.63	-9.06143	2.70951	-3.3443	0.000824898	0.00231506
gene-LOC103910030	137.378	-9.02234	1.80982	-4.98522	6.18915e-07	3.02805e-06
gene-zgc:152652	10284	-9.01142	2.02441	-4.45137	8.53238e-06	3.47808e-05
gene-cth1	7707.07	-8.99806	0.583995	-15.4078	1.4514e-53	1.92783e-51
gene-retsatl	12495.9	-8.99661	1.73327	-5.19055	2.09679e-07	1.09915e-06
gene-uba2-2	520.541	-8.95479	0.815727	-10.9777	4.89338e-28	1.76769e-26
gene-si:dkey-241l7.6	2490.63	-8.95379	1.48748	-6.01943	1.75033e-09	1.22495e-08
gene-hyal6-2	47.5543	-8.94563	2.01117	-4.44796	8.6688e-06	3.52814e-05
gene-zgc:171445	14068.2	-8.90061	1.86162	-4.78111	1.74331e-06	7.94677e-06
gene-si:dkey-46g23.5	11134.3	-8.8628	0.468344	-18.9237	7.27518e-80	3.55537e-77
gene-zgc:171446	22180.7	-8.83991	0.796498	-11.0985	1.27598e-28	4.81772e-27
gene-si:dkeyp-98a7.8	1721.87	-8.79382	0.549018	-16.0174	9.66672e-58	1.56486e-55
gene-zgc:112146	114.676	-8.77371	1.52803	-5.74184	9.3651e-09	5.94961e-08
gene-gbgt1l1	443.011	-8.72606	0.800165	-10.9053	1.087e-27	3.87803e-26
gene-si:dkeyp-20e4.8-2	544.965	-8.72076	0.869489	-10.0297	1.12805e-23	3.03717e-22
gene-LOC100331830	1284.79	-8.68097	0.519178	-16.7206	9.27462e-63	1.9853e-60
gene-si:ch211-250e5.3	1692.17	-8.67963	0.651787	-13.3167	1.85184e-40	1.37829e-38
gene-LOC100538023	38.9983	-8.66035	1.67501	-5.17033	2.33679e-07	1.21708e-06
gene-LOC108184066	208.592	-8.63427	1.19484	-7.2263	4.96339e-13	5.20052e-12
gene-zgc:165453	8304.26	-8.62369	0.34602	-24.9225	4.24685e-137	2.74994e-133
gene-LOC100537972	5279.75	-8.60718	1.50019	-5.73739	9.61479e-09	6.09776e-08
gene-LOC100331909-2	1817.82	-8.60238	0.486001	-17.7003	4.16709e-70	1.26979e-67
gene-kpna7	6680.2	-8.57625	0.486762	-17.619	1.76084e-69	5.12444e-67
gene-zgc:171474	8438.45	-8.57159	2.02924	-4.22404	2.39965e-05	9.06157e-05
gene-LOC108179180	1267.52	-8.56528	0.639615	-13.3913	6.79696e-41	5.1627e-39
gene-LOC564755	1400.85	-8.5478	2.18319	-3.91528	9.02993e-05	0.000307015
gene-si:dkeyp-46h3.2	4413.42	-8.53984	0.556234	-15.353	3.38339e-53	4.40368e-51
gene-zgc:173544-2	605.264	-8.53604	2.71444	-3.14468	0.0016627	0.0043646
gene-LOC101885477	484.97	-8.53309	0.789783	-10.8043	3.28301e-27	1.12181e-25
gene-ca15b	9829.14	-8.5147	2.90507	-2.93097	0.003379	0.00822861
gene-buc2l	5054.24	-8.50764	0.351031	-24.2361	9.26356e-130	3.99892e-126
gene-LOC100332822-2	8527.94	-8.50035	0.757996	-11.2142	3.47191e-29	1.35431e-27
gene-si:dkey-207j16.5	34.5609	-8.48608	1.70148	-4.98746	6.1177e-07	2.99536e-06
gene-zgc:175136	6865.83	-8.45401	0.684954	-12.3424	5.35121e-35	2.91793e-33
gene-vrtn	1172.45	-8.4312	0.622941	-13.5345	9.78292e-42	7.94318e-40
gene-igfbp5a	32.7832	-8.41044	1.72253	-4.88262	1.04684e-06	4.93048e-06
gene-cx44.2	1015.32	-8.40349	2.11365	-3.97582	7.01371e-05	0.000242701
gene-wu:fi09b08-2	9779.71	-8.35805	0.782905	-10.6757	1.32265e-26	4.34195e-25
gene-si:ch211-263m18.4	8372.55	-8.31978	1.87965	-4.42624	9.58879e-06	3.87275e-05
gene-zgc:171776	3415.69	-8.31711	2.62119	-3.17303	0.00150858	0.00399037
gene-zgc:171750	17287.8	-8.3148	2.28057	-3.64593	0.000266424	0.000825634
gene-zgc:173837	14927.6	-8.31458	1.93552	-4.29579	1.74073e-05	6.73237e-05
gene-si:dkey-152b24.6	2560.66	-8.3141	1.41066	-5.89378	3.77451e-09	2.52424e-08
gene-LOC100334068	30.5799	-8.31025	1.74914	-4.75104	2.02371e-06	9.13968e-06
gene-zp3	10875.7	-8.30929	1.64659	-5.04635	4.50329e-07	2.24826e-06
gene-si:dkey-172k15.19	4568.93	-8.27713	1.90009	-4.35617	1.32358e-05	5.22116e-05
gene-LOC100332229	4141.82	-8.25253	1.36196	-6.05932	1.36698e-09	9.71097e-09
gene-zgc:165539	7337.14	-8.25202	0.72329	-11.409	3.77014e-30	1.57501e-28
gene-zgc:171779	10145.2	-8.24077	1.15525	-7.13332	9.79775e-13	9.98707e-12
gene-si:ch1073-263o8.2	21155.7	-8.22807	1.63642	-5.02808	4.95409e-07	2.45816e-06
gene-LOC100334800	2942.52	-8.22306	1.32339	-6.21363	5.17748e-10	3.87019e-09
gene-si:ch211-12h2.6-2	999.503	-8.22023	0.623945	-13.1746	1.22865e-39	8.69486e-38
gene-zp3a.1	10573.6	-8.21933	1.76185	-4.66517	3.08357e-06	1.35277e-05
gene-LOC110438210	3659.67	-8.20875	1.22934	-6.67738	2.43258e-11	2.11786e-10
gene-zgc:171517-3	155.021	-8.20348	1.78008	-4.60849	4.05599e-06	1.74741e-05
gene-si:dkey-208k4.2	2138.65	-8.19109	0.391604	-20.9167	3.76977e-97	3.90563e-94
gene-si:dkey-229d11.5	22275	-8.18561	1.67469	-4.88783	1.01951e-06	4.80737e-06
gene-si:ch73-90k17.1	6369.18	-8.1805	0.617056	-13.2573	4.0934e-40	2.96984e-38
gene-zp3a.2	10015.7	-8.15518	1.47156	-5.54186	2.99269e-08	1.77377e-07
gene-zgc:136254	2510.26	-8.15157	1.27493	-6.39376	1.61852e-10	1.282e-09
gene-si:ch211-146l10.8	17234.1	-8.14972	1.79809	-4.53244	5.83058e-06	2.44841e-05
gene-si:dkey-88l16.3	6506.9	-8.13122	0.512658	-15.8609	1.18185e-56	1.84404e-54
gene-pard6a	26.9271	-8.12514	1.81102	-4.48649	7.24058e-06	2.99056e-05
gene-si:ch211-125e6.12	1897.88	-8.12355	1.35926	-5.97644	2.28072e-09	1.57486e-08
gene-LOC110438347	582.333	-8.12313	0.640219	-12.6881	6.88768e-37	4.1976e-35
gene-zgc:153499	2772.52	-8.11969	2.59131	-3.13343	0.00172776	0.00451935
gene-birc5b	785.314	-8.10187	0.611649	-13.2459	4.76297e-40	3.42683e-38
gene-kcns3b	431.825	-8.09792	0.757755	-10.6867	1.17445e-26	3.86523e-25
gene-zp3.2	12461.2	-8.08555	1.53304	-5.27419	1.33342e-07	7.19667e-07
gene-zgc:111868	22054.4	-8.08516	1.16974	-6.91193	4.78096e-12	4.53098e-11
gene-wu:fi42e03	13578	-8.07998	1.87456	-4.31033	1.6301e-05	6.33855e-05
gene-si:ch211-125e6.13	2147.39	-8.06553	1.68748	-4.77962	1.75623e-06	8.00282e-06
gene-cldng	7253.59	-8.0386	0.453411	-17.7292	2.49733e-70	7.7004e-68
gene-si:dkey-37o8.1	2521.08	-8.02428	0.697795	-11.4995	1.32715e-30	5.7291e-29
gene-zgc:171977	8040.43	-8.02249	2.11096	-3.80041	0.00014446	0.000473267
gene-LOC100535162	1216.99	-8.02203	0.490539	-16.3535	4.10704e-60	7.59832e-58
gene-wu:fi34b01	1537.09	-8.01678	0.627399	-12.7778	2.18159e-37	1.37149e-35
gene-si:dkeyp-98a7.5	403.672	-8.00945	0.704851	-11.3633	6.36737e-30	2.63874e-28
gene-si:ch211-223m11.2	1957.69	-8.0081	0.48543	-16.4969	3.86154e-61	7.69367e-59
gene-crp2	4731.3	-7.98753	0.616874	-12.9484	2.39942e-38	1.58539e-36
gene-zgc:162969	2401.89	-7.9759	0.518404	-15.3855	2.04811e-53	2.68243e-51
gene-si:ch211-157j23.2	659.681	-7.97179	0.549588	-14.505	1.12585e-47	1.18539e-45
gene-si:ch211-14a17.7	5246.14	-7.93046	0.574913	-13.7942	2.76195e-43	2.39255e-41
gene-sdhc-2	65.0068	-7.9301	2.18134	-3.63543	0.000277517	0.000855915
gene-LOC103909054	64.5196	-7.92626	1.84749	-4.29029	1.78443e-05	6.89212e-05
gene-zgc:165518	16570.2	-7.91333	0.568387	-13.9224	4.62892e-44	4.19208e-42
gene-LOC103909927	3553.57	-7.91316	0.55932	-14.1478	1.92598e-45	1.86137e-43
gene-chia.4	6185.27	-7.9109	2.0847	-3.79474	0.000147797	0.000483222
gene-zgc:162592	1368.05	-7.90344	0.48374	-16.3382	5.27891e-60	9.69709e-58
gene-si:ch211-146l10.7	13629.7	-7.87351	2.11246	-3.72718	0.000193635	0.000617577
gene-LOC100148225	9911.31	-7.85747	1.81406	-4.33143	1.48146e-05	5.80066e-05
gene-si:dkeyp-50f7.2	18374.5	-7.8468	0.647466	-12.1193	8.35138e-34	4.18393e-32
gene-tuba4l	8007.1	-7.83667	0.330374	-23.7206	2.20833e-124	8.17113e-121
gene-zgc:171818	2696.94	-7.83041	1.41825	-5.52116	3.36774e-08	1.9793e-07
gene-LOC100536860	7199.06	-7.82814	1.4	-5.59153	2.25078e-08	1.3586e-07
gene-LOC108184065	58.8086	-7.81205	1.6927	-4.61515	3.92818e-06	1.69686e-05
gene-tmprss4b-2	1209.14	-7.80682	0.743991	-10.4932	9.28644e-26	2.88058e-24
gene-elovl7b	1902.35	-7.77478	0.363385	-21.3954	1.4736e-101	1.94715e-98
gene-si:dkey-240e12.6	2220.35	-7.75696	1.7648	-4.39537	1.10584e-05	4.41465e-05
gene-LOC100535847-2	111.977	-7.75286	1.32081	-5.86976	4.36428e-09	2.89621e-08
gene-si:ch211-14a17.7-2	746.758	-7.73782	2.54418	-3.04138	0.00235493	0.00597405
gene-trim35-29	498.157	-7.72014	0.807957	-9.55514	1.23422e-21	2.8517e-20
gene-pdgfc-3	20.3361	-7.71954	2.07023	-3.72884	0.000192361	0.000613968
gene-si:ch211-154a22.8-3	366.282	-7.6989	1.72205	-4.47078	7.79343e-06	3.2046e-05
gene-LOC100536038	2209.65	-7.67926	0.613283	-12.5216	5.6907e-36	3.33472e-34
gene-h1m	1830.03	-7.66985	0.593319	-12.927	3.16842e-38	2.0776e-36
gene-cldnd	8773.42	-7.6274	1.29078	-5.90916	3.43855e-09	2.31631e-08
gene-si:dkey-216e24.3	937.125	-7.61194	1.43191	-5.31594	1.06109e-07	5.81719e-07
gene-si:ch73-78o10.1	539.192	-7.57184	0.940747	-8.04875	8.36442e-16	1.1604e-14
gene-zgc:56231	5411.95	-7.56871	0.429227	-17.6334	1.36588e-69	4.0664e-67
gene-si:ch211-226h8.4	17.7802	-7.52775	1.92097	-3.91872	8.90198e-05	0.000302943
gene-LOC100332822	97.0926	-7.52675	1.64294	-4.58127	4.62157e-06	1.97205e-05
gene-LOC100535338	1988.83	-7.49719	0.373807	-20.0563	1.77732e-89	1.31527e-86
gene-LOC108191474	17.1566	-7.4771	2.01939	-3.70265	0.000213361	0.000674429
gene-zar1	2858.11	-7.44504	0.598519	-12.4391	1.60292e-35	9.0059e-34
gene-si:ch211-132b12.8	6416.03	-7.43571	0.316178	-23.5175	2.70069e-122	8.25579e-119
gene-si:dkey-241l7.3	551.374	-7.43517	0.660121	-11.2633	1.99086e-29	7.92095e-28
gene-zgc:195245	514.69	-7.35383	0.533661	-13.78	3.36472e-43	2.87623e-41
gene-rccd1	15.669	-7.3466	2.24851	-3.26732	0.00108573	0.00296984
gene-si:ch211-145c1.1	1477.72	-7.32519	0.651456	-11.2443	2.46956e-29	9.75436e-28
gene-si:ch1073-75o15.3	2004.91	-7.31861	1.61066	-4.54385	5.52364e-06	2.32896e-05
gene-ctss2.1	9541.19	-7.31228	0.685101	-10.6733	1.35724e-26	4.44986e-25
gene-zp2.2	3318.48	-7.29877	1.68495	-4.33173	1.4794e-05	5.79433e-05
gene-si:ch211-198m1.1	405.048	-7.27435	0.63563	-11.4443	2.51114e-30	1.06465e-28
gene-si:ch73-132k15.2	1520.09	-7.21613	0.386402	-18.6752	7.88237e-78	3.64574e-75
gene-zp3b	11807.6	-7.21248	0.557949	-12.9268	3.17922e-38	2.07942e-36
gene-nanos3	913.774	-7.19482	0.548648	-13.1137	2.7473e-39	1.88747e-37
gene-gbgt1l4	1199.7	-7.18663	1.49942	-4.79295	1.6435e-06	7.5289e-06
gene-zgc:171426	20974.5	-7.18004	0.344379	-20.8493	1.54815e-96	1.39858e-93
gene-zgc:171734	112.116	-7.16327	1.0152	-7.05604	1.71316e-12	1.70558e-11
gene-zgc:113424	1570.3	-7.16009	0.387219	-18.4911	2.43612e-76	9.70739e-74
gene-si:dkey-91f15.8-2	37.8308	-7.15846	1.63591	-4.37583	1.20972e-05	4.79979e-05
gene-vldlr	4589.76	-7.14713	0.476896	-14.9868	8.96179e-51	1.08467e-48
gene-mtus1a-2	259.026	-7.12792	0.844354	-8.44186	3.12331e-17	4.95995e-16
gene-slc16a3	6545.76	-7.12225	0.265041	-26.8722	4.64058e-159	6.00979e-155
gene-s100a1	642.979	-7.09327	0.485246	-14.6179	2.15978e-48	2.32118e-46
gene-si:ch211-250e5.16	280.91	-7.07653	0.731553	-9.6733	3.91528e-22	9.37242e-21
gene-zbtb10-2	35.4072	-7.07515	1.66539	-4.24834	2.1536e-05	8.20179e-05
gene-si:ch211-103b1.2	5702.02	-7.07461	0.358345	-19.7425	9.30986e-87	5.7413e-84
gene-agtrap	12.6949	-7.04174	2.08298	-3.38061	0.000723257	0.00205407
gene-si:dkey-241l7.5	2687.89	-7.02675	0.534976	-13.1347	2.08313e-39	1.43881e-37
gene-slbp2	4829.01	-7.02386	0.299509	-23.4513	1.28345e-121	3.32428e-118
gene-plk3	5621.82	-6.98668	0.283079	-24.681	1.71028e-134	8.85961e-131
gene-elovl6l	4845.74	-6.98501	0.326486	-21.3945	1.50353e-101	1.94715e-98
gene-rbpms2b	3190.15	-6.94878	0.400678	-17.3426	2.24463e-67	6.18491e-65
gene-micall2a	2642.09	-6.94391	0.35047	-19.8132	2.2928e-87	1.44843e-84
gene-cyp19a1a	32.3166	-6.94237	1.79566	-3.86618	0.000110552	0.000370283
gene-b4galnt2.2-2	223.057	-6.90765	0.686527	-10.0617	8.15568e-24	2.21194e-22
gene-LOC101885765	157.61	-6.89675	0.783583	-8.80156	1.3493e-18	2.41188e-17
gene-snx10a	1619.17	-6.88689	0.345442	-19.9365	1.96388e-88	1.37477e-85
gene-si:ch211-11i22.4	1659.77	-6.86483	0.321316	-21.3647	2.84561e-101	3.50972e-98
gene-pdha1a	11.1893	-6.85816	2.1815	-3.14378	0.00166782	0.00437584
gene-si:dkey-88l16.5	523.893	-6.85808	0.508103	-13.4974	1.61952e-41	1.30271e-39
gene-caprin2	6787.05	-6.85251	0.400803	-17.097	1.56366e-65	3.75003e-63
gene-ftr55	10.7446	-6.80154	2.2012	-3.08992	0.00200208	0.00516596
gene-zgc:152863	936.722	-6.79523	0.385823	-17.6123	1.98186e-69	5.70358e-67
gene-zgc:162879	4627.52	-6.79135	0.346016	-19.6273	9.04577e-86	5.32487e-83
gene-zp2.3	2560.24	-6.76682	1.37586	-4.91824	8.73238e-07	4.16073e-06
gene-si:ch73-303b9.1	2961.57	-6.72221	0.322303	-20.8568	1.32253e-96	1.2687e-93
gene-pou5f3	4328.83	-6.69679	0.751119	-8.91575	4.84532e-19	9.00278e-18
gene-LOC100329589	358.991	-6.69675	0.557032	-12.0222	2.71611e-33	1.32486e-31
gene-arl3l1	27.4197	-6.6863	1.73545	-3.85277	0.000116789	0.000389613
gene-gtf3ab-2	2434.09	-6.67951	0.294871	-22.6523	1.32299e-113	2.44763e-110
gene-bmp15	1193.56	-6.64113	0.371791	-17.8625	2.30928e-71	7.47659e-69
gene-zgc:162945-2	391.928	-6.63966	0.543347	-12.2199	2.43285e-34	1.27043e-32
gene-LOC572450	129.885	-6.62925	0.818812	-8.09618	5.67141e-16	8.00519e-15
gene-osbpl7	51.6462	-6.62625	1.2588	-5.26395	1.40993e-07	7.57964e-07
gene-LOC566119	896.296	-6.6229	0.785164	-8.43505	3.31051e-17	5.24117e-16
gene-phex	4013.32	-6.61708	0.392975	-16.8384	1.27599e-63	2.84909e-61
gene-zgc:101663	1566.68	-6.6138	0.463795	-14.2602	3.87476e-46	3.88993e-44
gene-tmtc2b-2	78.8457	-6.61354	1.08095	-6.11825	9.46058e-10	6.86575e-09
gene-si:zfos-1505d6.3	1162.12	-6.58983	0.663182	-9.93669	2.88249e-23	7.48841e-22
gene-zgc:114123	2517.92	-6.58529	0.28368	-23.2138	3.30233e-119	7.77579e-116
gene-si:dkey-1d7.3	506.808	-6.57041	0.647568	-10.1463	3.44211e-24	9.5454e-23
gene-pmaip1	649.806	-6.5638	0.444315	-14.7729	2.19239e-49	2.40615e-47
gene-si:dkey-241l7.2	2351.41	-6.55798	1.62084	-4.04604	5.20923e-05	0.000184878
gene-gpr160	452.05	-6.55554	0.552859	-11.8575	1.96673e-32	9.17843e-31
gene-LOC110440102	843.954	-6.5516	0.682896	-9.59385	8.48601e-22	1.98193e-20
gene-hapln4	783.063	-6.53636	0.394482	-16.5695	1.15858e-61	2.36286e-59
gene-zgc:113425	721.751	-6.51184	0.396705	-16.4148	1.49833e-60	2.87469e-58
gene-cpeb1b	10056.4	-6.50453	0.311987	-20.8487	1.56592e-96	1.39858e-93
gene-si:ch211-241j12.4	1904.13	-6.49291	0.398866	-16.2784	1.40399e-59	2.54298e-57
gene-gdf3	3967.71	-6.48771	0.290751	-22.3136	2.72604e-110	4.70715e-107
gene-hsd17b12a	2431.47	-6.48717	0.299419	-21.6659	4.30748e-104	6.19823e-101
gene-foxh1	989.195	-6.47768	0.350872	-18.4616	4.204e-76	1.64982e-73
gene-larp6	5755.79	-6.47619	0.377426	-17.1588	5.39992e-66	1.3579e-63
gene-LOC110439861	857.816	-6.47093	0.603891	-10.7154	8.61862e-27	2.86193e-25
gene-tecrl2b	163.918	-6.46982	0.69899	-9.25597	2.12302e-20	4.4489e-19
gene-mtmr7a-2	161.453	-6.46333	1.03762	-6.22901	4.69396e-10	3.52707e-09
gene-si:ch211-241j12.3	4733.81	-6.44549	0.336445	-19.1576	8.36116e-82	4.33125e-79
gene-zgc:73340	1007.9	-6.43197	0.356592	-18.0373	9.92159e-73	3.42639e-70
gene-mylipa	3994.92	-6.42995	0.346407	-18.5618	6.54383e-77	2.77855e-74
gene-lin28a	1281.52	-6.42673	0.380023	-16.9114	3.70563e-64	8.49376e-62
gene-pif1	3241.27	-6.42529	0.273243	-23.5149	2.8687e-122	8.25579e-119
gene-nutf2	22.5768	-6.42087	1.74479	-3.68003	0.000233211	0.000731991
gene-LOC108179657	359.73	-6.41567	0.574845	-11.1607	6.34875e-29	2.43613e-27
gene-fzd5	428.433	-6.40982	0.464885	-13.788	3.01115e-43	2.59109e-41
gene-elovl7a-2	837.659	-6.38327	0.369926	-17.2555	1.0166e-66	2.6597e-64
gene-si:dkey-167i21.2	570.993	-6.38246	0.434401	-14.6925	7.19757e-49	7.86601e-47
gene-snai3	198.383	-6.38053	0.641307	-9.94925	2.54084e-23	6.62075e-22
gene-LOC565175	570.953	-6.36792	0.575186	-11.0711	1.73318e-28	6.44986e-27
gene-micall2b	3133.13	-6.36685	0.356157	-17.8765	1.79651e-71	5.89006e-69
gene-igf2bp3	3368.12	-6.36562	0.348419	-18.27	1.43467e-74	5.30848e-72
gene-zp3c	2245.38	-6.36311	0.443852	-14.3361	1.30178e-46	1.32745e-44
gene-foxa	44.1363	-6.35729	1.36972	-4.64129	3.46233e-06	1.5077e-05
gene-pabpc1l	408.893	-6.35332	0.573646	-11.0753	1.65256e-28	6.15869e-27
gene-LOC108179134	151.033	-6.34239	0.851035	-7.45256	9.15471e-14	1.0296e-12
gene-si:dkey-43p13.5	42.745	-6.33284	1.26677	-4.99919	5.75729e-07	2.83067e-06
gene-gapdh	7031.78	-6.31095	0.468811	-13.4616	2.63168e-41	2.0845e-39
gene-si:ch211-137a8.2	2184.03	-6.28213	0.297115	-21.1438	3.14626e-99	3.70414e-96
gene-buc	8691.34	-6.26984	0.300578	-20.8593	1.25445e-96	1.24967e-93
gene-zp2.5	1247.07	-6.24982	0.758242	-8.24251	1.68636e-16	2.50449e-15
gene-LOC108181540	80.9435	-6.24202	0.975806	-6.39679	1.58681e-10	1.25881e-09
gene-spsb1-2	2188.88	-6.2416	0.336061	-18.5728	5.33432e-77	2.30274e-74
gene-olfm2a	99.3159	-6.24155	0.885687	-7.04713	1.82641e-12	1.81249e-11
gene-prtfdc1	610.042	-6.22556	0.54504	-11.4222	3.23881e-30	1.35962e-28
gene-mid1ip1l	7012.89	-6.22404	0.376847	-16.5161	2.80891e-61	5.63981e-59
gene-lipg	4401.41	-6.21227	0.323266	-19.2172	2.65585e-82	1.40386e-79
gene-oclnb	963.942	-6.20446	0.741884	-8.36311	6.1084e-17	9.42309e-16
gene-LOC100334275	734.262	-6.19079	0.681461	-9.08458	1.041e-19	2.05353e-18
gene-sh2d5	1523.36	-6.17965	0.320491	-19.2818	7.6359e-83	4.20803e-80
gene-bach2a	883.512	-6.17795	0.345245	-17.8944	1.30433e-71	4.33123e-69
gene-lsm14b	2559.29	-6.16887	0.446817	-13.8062	2.33696e-43	2.0312e-41
gene-acp5a	55.095	-6.15461	1.52131	-4.04559	5.21923e-05	0.000185208
gene-mtus1a	431.272	-6.1425	0.48489	-12.6678	8.91604e-37	5.39566e-35
gene-si:ch211-286b5.4	655.434	-6.13638	0.728625	-8.42185	3.70582e-17	5.82784e-16
gene-si:dkeyp-114g9.1	1926.05	-6.12426	0.281471	-21.758	5.79883e-105	9.38722e-102
gene-zp2.6	902.842	-6.12413	1.46221	-4.18828	2.81072e-05	0.000104734
gene-dapk2b	146.225	-6.12093	0.816341	-7.49801	6.47951e-14	7.4292e-13
gene-zgc:66479	733.214	-6.11818	0.400468	-15.2776	1.07867e-52	1.38998e-50
gene-zp3d.1	1024.88	-6.10687	0.430237	-14.1942	9.95146e-46	9.76337e-44
gene-zgc:77112	1860.17	-6.10172	0.718527	-8.49198	2.03138e-17	3.268e-16
gene-LOC100537499	18.059	-6.09724	1.83839	-3.31663	0.000911114	0.00253668
gene-si:dkey-9c18.3	18.329	-6.09355	1.87857	-3.24372	0.00117978	0.00320174
gene-lmo7b-2	235.083	-6.09177	0.819601	-7.4326	1.06481e-13	1.19083e-12
gene-si:ch211-160j14.2	416.73	-6.08694	0.456122	-13.345	1.26729e-40	9.48674e-39
gene-LOC564674	826.552	-6.08566	0.364337	-16.7034	1.23864e-62	2.62968e-60
gene-kdf1a	501.886	-6.08306	0.435608	-13.9645	2.56606e-44	2.34026e-42
gene-zar1l-2	2011.45	-6.07609	0.375052	-16.2006	4.98979e-59	8.61604e-57
gene-si:ch211-39i2.2	1733.82	-6.07093	0.295368	-20.5538	7.1164e-94	5.58551e-91
gene-sycp2l	723.764	-6.0451	0.414954	-14.5681	4.48156e-48	4.73784e-46
gene-zgc:55413	3532.74	-6.04334	0.368357	-16.4062	1.72621e-60	3.28753e-58
gene-pygl	1242.93	-6.03872	0.442769	-13.6385	2.36248e-42	1.94874e-40
gene-si:ch211-157j23.3	173.529	-6.02239	0.682209	-8.82777	1.0678e-18	1.91797e-17
gene-zgc:110788	257.379	-6.02201	0.552688	-10.8959	1.20609e-27	4.28519e-26
gene-spsb1	2234.24	-6.01716	0.312132	-19.2776	8.27835e-83	4.46703e-80
gene-si:dkeyp-34c12.1-2	307.322	-6.01459	0.505937	-11.888	1.36603e-32	6.41422e-31
gene-lpcat4	2415.42	-6.00836	0.482786	-12.4452	1.48538e-35	8.40016e-34
gene-st6galnac1.2	841.638	-5.98297	0.346535	-17.2651	8.60959e-67	2.29894e-64
gene-tmprss4a	1750.78	-5.97572	0.290243	-20.5887	3.46468e-94	2.80434e-91
gene-LOC100004528	80.2789	-5.91037	0.860239	-6.87061	6.39278e-12	5.98191e-11
gene-LOC565175-2	648.404	-5.90569	0.607713	-9.71789	2.52959e-22	6.129e-21
gene-galnt6	932.403	-5.89889	0.359876	-16.3915	2.20105e-60	4.13111e-58
gene-zgc:77118	3299.29	-5.89839	0.284028	-20.7669	8.62726e-96	7.44849e-93
gene-zgc:173443	231.53	-5.88886	1.7983	-3.27468	0.0010578	0.00290266
gene-dctpp1-3	127.652	-5.88802	1.33657	-4.40531	1.05634e-05	4.23142e-05
gene-prokr1b	63.6281	-5.88619	1.0187	-5.77815	7.5525e-09	4.85403e-08
gene-si:ch211-14a17.6-2	631.475	-5.88415	0.439938	-13.3749	8.47123e-41	6.39689e-39
gene-tmem44	936.099	-5.87651	0.427253	-13.7542	4.80749e-43	4.05599e-41
gene-gnai2b	557.992	-5.8733	0.414596	-14.1663	1.48067e-45	1.43636e-43
gene-lrrc4c	306.715	-5.8577	0.541308	-10.8214	2.72621e-27	9.35251e-26
gene-slc2a15b	687.551	-5.84799	0.409467	-14.282	2.83528e-46	2.85746e-44
gene-ecm1a	164.063	-5.82289	0.739765	-7.87127	3.51055e-15	4.56919e-14
gene-pcca-2	31.0178	-5.81822	1.84028	-3.1616	0.00156907	0.00413939
gene-LOC110439932	1519.19	-5.8132	0.332375	-17.4899	1.71162e-68	4.87174e-66
gene-LOC110438624	58.2992	-5.7849	0.978014	-5.91495	3.31971e-09	2.24325e-08
gene-baiap2l1a	872.835	-5.77593	0.340987	-16.9388	2.32657e-64	5.42887e-62
gene-zp2.1	579.211	-5.77587	0.755566	-7.64443	2.0987e-14	2.53892e-13
gene-cited4b-2	1011.39	-5.77563	0.56808	-10.1669	2.7855e-24	7.76612e-23
gene-uchl1	3295.14	-5.77563	0.419073	-13.7819	3.27522e-43	2.80899e-41
gene-cux2a	146.331	-5.76614	0.666321	-8.65369	4.98592e-18	8.4849e-17
gene-si:dkey-68o6.5-2	807.948	-5.74758	0.459762	-12.5012	7.35256e-36	4.25086e-34
gene-zgc:113293	1272.44	-5.74443	0.318581	-18.0313	1.10628e-72	3.77023e-70
gene-zgc:153049	157.205	-5.72765	0.671301	-8.53216	1.43646e-17	2.34885e-16
gene-rdh10b	4360.14	-5.7225	0.29557	-19.3609	1.64988e-83	9.49633e-81
gene-ormdl3-2	148.997	-5.72008	1.04275	-5.48556	4.12159e-08	2.38929e-07
gene-ckbb	5042.46	-5.71588	0.412368	-13.8611	1.08982e-43	9.60116e-42
gene-LOC103908986	1154.04	-5.70143	0.374851	-15.2099	3.0415e-52	3.89989e-50
gene-otx1b	768.249	-5.69615	0.423628	-13.4461	3.24505e-41	2.55472e-39
gene-zgc:194551-2	27.7144	-5.67186	1.41603	-4.00546	6.18977e-05	0.0002163
gene-LOC108181630	13.4924	-5.6688	1.91555	-2.95936	0.00308275	0.00758851
gene-si:dkey-92i15.4	273.177	-5.65333	0.844741	-6.69238	2.19573e-11	1.92329e-10
gene-znf143b-3	41.0809	-5.65001	1.22832	-4.59981	4.22884e-06	1.81583e-05
gene-wdr47b	869.625	-5.63666	0.37559	-15.0075	6.56047e-51	8.01523e-49
gene-ppp1r3b	51.8893	-5.63382	1.10971	-5.07686	3.83729e-07	1.93403e-06
gene-st8sia2	316.706	-5.62859	0.450054	-12.5065	6.88019e-36	3.9956e-34
gene-svila-2	38.6806	-5.6235	1.24515	-4.51631	6.29253e-06	2.63088e-05
gene-si:ch211-217a12.1	66.6068	-5.62298	0.925484	-6.07572	1.23435e-09	8.8415e-09
gene-cdcp1b	1263.77	-5.61311	0.310949	-18.0516	7.67052e-73	2.68478e-70
gene-zgc:136302	924.11	-5.60882	0.44539	-12.593	2.30594e-36	1.37618e-34
gene-lmo7b	298.066	-5.60376	0.521364	-10.7483	6.03798e-27	2.0284e-25
gene-ccnjl	2225.13	-5.60324	0.3416	-16.4029	1.82205e-60	3.44474e-58
gene-il13ra2	152.012	-5.58385	0.975115	-5.72635	1.02613e-08	6.49028e-08
gene-tmed1a	382.2	-5.57886	0.420029	-13.2821	2.94138e-40	2.15211e-38
gene-p2rx4a	61.9258	-5.56975	1.06561	-5.22682	1.72454e-07	9.14004e-07
gene-sybu	3384.04	-5.54894	0.320706	-17.3023	4.52092e-67	1.21975e-64
gene-zgc:152968	1622.79	-5.54466	0.301975	-18.3613	2.68049e-75	1.00619e-72
gene-zfp36l2-2	1159.12	-5.53839	1.73443	-3.19321	0.00140699	0.00375
gene-p2rx4a-2	218.23	-5.51761	0.706699	-7.80758	5.82985e-15	7.41645e-14
gene-dab2	2969.96	-5.51409	0.41019	-13.4428	3.39518e-41	2.66481e-39
gene-crygmxl1	49.3695	-5.50998	1.16906	-4.71315	2.43912e-06	1.08942e-05
gene-nanog	5317.5	-5.50951	0.238569	-23.094	5.32146e-118	1.14859e-114
gene-hsd3b2	367.247	-5.50924	0.478334	-11.5176	1.07603e-30	4.6684e-29
gene-mcm6l-2	651.763	-5.50077	0.891056	-6.17332	6.68727e-10	4.92485e-09
gene-kcnc2	288.614	-5.49923	0.509416	-10.7952	3.62862e-27	1.23502e-25
gene-si:ch73-14h10.2-4	259.811	-5.49716	0.684221	-8.03419	9.42016e-16	1.29783e-14
gene-siva1	3251.99	-5.47217	0.319769	-17.1129	1.18937e-65	2.87904e-63
gene-mcoln3b	930.55	-5.46734	0.393066	-13.9095	5.54908e-44	5.0079e-42
gene-tph1a-2	93.8249	-5.45992	0.804767	-6.78447	1.16513e-11	1.0548e-10
gene-ccne1-2	492.571	-5.45739	0.377594	-14.453	2.3983e-47	2.50477e-45
gene-lrrc3	937.167	-5.45602	0.823283	-6.62714	3.42246e-11	2.92461e-10
gene-trim36	3133.68	-5.44521	0.272703	-19.9675	1.05537e-88	7.59311e-86
gene-si:ch73-204p21.2	727.961	-5.42727	0.434841	-12.481	9.47544e-36	5.44176e-34
gene-zgc:66483	966.99	-5.40918	0.303402	-17.8284	4.25372e-71	1.36019e-68
gene-zgc:194551	285.613	-5.40897	0.464191	-11.6525	2.22879e-31	9.97027e-30
gene-tmem54a	44.9013	-5.4015	1.04196	-5.18401	2.17168e-07	1.13588e-06
gene-myh9a	7078.87	-5.40022	0.518821	-10.4086	2.26442e-25	6.8278e-24
gene-rarab-2	97.8962	-5.39795	1.16433	-4.63608	3.5507e-06	1.54462e-05
gene-zgc:162945	596.68	-5.39212	0.553677	-9.73875	2.06066e-22	5.01628e-21
gene-ftr86	775.261	-5.38113	0.368257	-14.6124	2.33982e-48	2.50429e-46
gene-LOC100334439	320.534	-5.36591	0.477195	-11.2447	2.45982e-29	9.74185e-28
gene-si:dkey-192l18.10	274.487	-5.36545	0.498645	-10.7601	5.31366e-27	1.79204e-25
gene-si:dkey-16p21.8	186.226	-5.36364	0.610677	-8.78311	1.5902e-18	2.81915e-17
gene-LOC100535390	45.4879	-5.35892	1.36063	-3.93855	8.19744e-05	0.000280589
gene-f2rl1.2	464.567	-5.35347	0.484166	-11.0571	2.02551e-28	7.51614e-27
gene-map1lc3c	2046.02	-5.3476	0.286449	-18.6686	8.91519e-78	4.05109e-75
gene-cyp2aa3	119.014	-5.32857	0.713192	-7.47144	7.93245e-14	8.99161e-13
gene-zgc:55621	1499.49	-5.31238	0.511123	-10.3936	2.65286e-25	7.97121e-24
gene-cd9b	995.522	-5.29778	0.468548	-11.3068	1.21449e-29	4.89978e-28
gene-ttyh2l	346.81	-5.29358	0.432374	-12.2431	1.83011e-34	9.67381e-33
gene-polr3g	20.5845	-5.29067	1.51497	-3.49226	0.000478955	0.00141147
gene-rhoq	206.853	-5.26234	0.514451	-10.229	1.46986e-24	4.16531e-23
gene-si:ch211-14a17.6	103.043	-5.25279	0.804012	-6.53323	6.43683e-11	5.34874e-10
gene-cbx2	1024.02	-5.25021	0.33584	-15.6331	4.33457e-55	6.37896e-53
gene-trpc5b	176.17	-5.24906	0.661173	-7.93901	2.03804e-15	2.7126e-14
gene-si:dkey-1h24.2	51.3295	-5.24654	1.03502	-5.06903	3.99841e-07	2.01054e-06
gene-cyp11a1	1685.83	-5.24242	0.572436	-9.15809	5.28262e-20	1.06645e-18
gene-pfkma	389.414	-5.23431	0.517273	-10.119	4.54857e-24	1.25199e-22
gene-tmem79a	420.538	-5.22914	0.431295	-12.1243	7.85574e-34	3.9509e-32
gene-LOC101886161	220.34	-5.22255	0.532359	-9.8102	1.01768e-22	2.54675e-21
gene-ppp1r14aa	364.649	-5.22223	0.543761	-9.6039	7.69764e-22	1.80268e-20
gene-hnmt	119.302	-5.21961	0.65063	-8.0224	1.03702e-15	1.4204e-14
gene-lbh	377.822	-5.21449	0.73947	-7.05165	1.76802e-12	1.75791e-11
gene-ek1	158.455	-5.19757	0.560491	-9.27324	1.80575e-20	3.8149e-19
gene-LOC100536112	392.704	-5.18872	0.445371	-11.6503	2.28598e-31	1.02085e-29
gene-LOC101882566	29.4321	-5.17519	1.28142	-4.03863	5.37651e-05	0.000190398
gene-gsto2	690.494	-5.17445	0.495337	-10.4463	1.52306e-25	4.64102e-24
gene-ddit4	2708.99	-5.17021	0.345723	-14.9548	1.44961e-50	1.71444e-48
gene-tmtopsb	112.186	-5.1426	0.887253	-5.79609	6.78773e-09	4.38755e-08
gene-LOC101886419	1382.89	-5.13976	0.384963	-13.3513	1.16401e-40	8.73886e-39
gene-shmt2	414.792	-5.13637	0.389191	-13.1975	9.06434e-40	6.48551e-38
gene-mgat3a	371.806	-5.13123	0.50116	-10.2387	1.33012e-24	3.78173e-23
gene-tspan36	1355.86	-5.12476	0.289033	-17.7308	2.4276e-70	7.57558e-68
gene-LOC100150142	18.756	-5.11957	1.49599	-3.4222	0.000621175	0.00178906
gene-LOC103910009	56.4788	-5.11197	1.10743	-4.61609	3.91041e-06	1.69009e-05
gene-zbtb8a	334.054	-5.10487	0.417132	-12.238	1.94761e-34	1.02531e-32
gene-afap1l1a-2	82.8022	-5.10382	0.732797	-6.96486	3.28742e-12	3.17833e-11
gene-rab32a	535.524	-5.10243	0.362789	-14.0644	6.28198e-45	5.89528e-43
gene-fscn2a	111.203	-5.09008	0.68478	-7.43316	1.06033e-13	1.18736e-12
gene-mknk2a	4169.82	-5.08915	0.310563	-16.3869	2.37412e-60	4.42389e-58
gene-sox11b	827.281	-5.08416	0.340709	-14.9223	2.35914e-50	2.75244e-48
gene-cachd1-2	27.4998	-5.07732	1.20352	-4.21871	2.45699e-05	9.26057e-05
gene-LOC797855	328.472	-5.07262	0.436963	-11.6088	3.71665e-31	1.63995e-29
gene-fbxo32	1281.25	-5.07129	0.341521	-14.8491	7.04652e-50	8.0049e-48
gene-kank1b	1010.94	-5.07005	0.295608	-17.1513	6.15044e-66	1.51717e-63
gene-ehmt1a	1168.56	-5.06912	0.452336	-11.2065	3.78675e-29	1.47047e-27
gene-LOC100332626	200.136	-5.06856	0.512127	-9.89708	4.28612e-23	1.10025e-21
gene-st6gal2b	285.567	-5.06534	0.506899	-9.99278	1.63911e-23	4.35431e-22
gene-zgc:110239	3360.32	-5.03687	0.444207	-11.339	8.40885e-30	3.41911e-28
gene-LOC100329495	252.597	-5.03293	0.544647	-9.24072	2.44846e-20	5.09788e-19
gene-ccz1-2	84.6246	-5.02653	1.12864	-4.45361	8.44395e-06	3.44637e-05
gene-etv5b	480.795	-5.02609	0.584837	-8.594	8.3992e-18	1.40535e-16
gene-ugt2a2-2	50.7242	-5.0202	1.27533	-3.93639	8.27174e-05	0.000282833
gene-rcc1	3117.47	-5.01768	0.410292	-12.2295	2.16178e-34	1.13116e-32
gene-mfsd4aa	1044.35	-5.01699	0.321541	-15.603	6.94687e-55	1.0052e-52
gene-si:dkey-104n9.1	149.611	-5.00836	0.626603	-7.99288	1.31824e-15	1.7839e-14
gene-LOC103911686	34.7094	-5.00581	1.05089	-4.76339	1.9037e-06	8.63384e-06
gene-npm2b	1672.11	-4.98038	0.314667	-15.8275	2.012e-56	3.10195e-54
gene-zdhhc18b	1878.45	-4.9754	0.409339	-12.1547	5.41393e-34	2.75493e-32
gene-lipia	314.386	-4.97502	0.417458	-11.9174	9.60589e-33	4.56518e-31
gene-alox5b.3	1042.16	-4.97394	0.795717	-6.2509	4.08104e-10	3.09073e-09
gene-nkain4	135.641	-4.96105	0.613534	-8.08602	6.16447e-16	8.66338e-15
gene-axin2	565.465	-4.95494	0.415044	-11.9383	7.46945e-33	3.56292e-31
gene-tmem144b	1524.56	-4.953	0.449396	-11.0214	3.01193e-28	1.09721e-26
gene-parn	4524.41	-4.95293	0.326836	-15.1542	7.11063e-52	9.02806e-50
gene-si:ch73-15b2.5	2130.41	-4.9464	0.3053	-16.2018	4.8997e-59	8.51725e-57
gene-srgap1b	1437.9	-4.94139	0.28633	-17.2577	9.79479e-67	2.58872e-64
gene-ap1s3b	396.592	-4.93775	0.381537	-12.9417	2.61621e-38	1.72424e-36
gene-pdp1	1007.74	-4.93688	0.371282	-13.2969	2.41412e-40	1.78143e-38
gene-zfpm2b	212.819	-4.93543	0.716885	-6.88455	5.79695e-12	5.44997e-11
gene-pcxb	106.216	-4.93463	0.854346	-5.77592	7.65347e-09	4.91648e-08
gene-tmco1-2	184.998	-4.91931	1.14157	-4.30926	1.63801e-05	6.36457e-05
gene-fjx1	396.403	-4.90405	0.47531	-10.3176	5.868e-25	1.72126e-23
gene-mgat4b	691.134	-4.90299	0.398274	-12.3106	7.94273e-35	4.28593e-33
gene-ptpn4a	105.626	-4.90039	1.20059	-4.08164	4.4719e-05	0.000160625
gene-si:ch211-180a12.2	120.498	-4.89868	0.606296	-8.07969	6.4933e-16	9.08607e-15
gene-LOC100535847	16.1514	-4.89781	1.49134	-3.28416	0.00102287	0.00281486
gene-ddx19	2375.63	-4.89537	0.266469	-18.3712	2.23299e-75	8.50541e-73
gene-f2rl1.1	894.8	-4.88421	0.357584	-13.6589	1.78623e-42	1.47812e-40
gene-slc7a11	39.8936	-4.8701	1.13985	-4.27256	1.93237e-05	7.42918e-05
gene-igfbp5a-2	16.2541	-4.86925	1.64813	-2.9544	0.00313278	0.00769265
gene-ush1gb	47.5415	-4.86845	1.04537	-4.65715	3.20622e-06	1.4023e-05
gene-ccna1	8810.31	-4.86648	0.274318	-17.7403	2.04968e-70	6.47423e-68
gene-twsg1b-2	102.744	-4.86401	0.656754	-7.40614	1.30031e-13	1.44051e-12
gene-lamp2	10453.6	-4.85173	0.330472	-14.6812	8.50416e-49	9.25489e-47
gene-cyp2x7-2	54.4198	-4.85057	1.66006	-2.92192	0.00347878	0.00845332
gene-lef1	359.064	-4.84934	0.384351	-12.617	1.70278e-36	1.01856e-34
gene-bmb	2788.81	-4.8377	0.403901	-11.9774	4.66507e-33	2.25009e-31
gene-cyp11a1-2	426.789	-4.82092	0.504974	-9.54686	1.33681e-21	3.0805e-20
gene-cobll1a	597.021	-4.81071	0.362442	-13.2731	3.31782e-40	2.4139e-38
gene-zgc:66449	639.306	-4.80973	0.615278	-7.81716	5.40278e-15	6.90027e-14
gene-ggt1a	37.7781	-4.8056	0.990444	-4.85197	1.22242e-06	5.70895e-06
gene-si:dkey-121h17.7	488.954	-4.80291	0.395782	-12.1353	6.86918e-34	3.48177e-32
gene-cited2	256.27	-4.80028	0.43085	-11.1414	7.8864e-29	3.00391e-27
gene-sox19b	4312.13	-4.79325	0.242862	-19.7365	1.04805e-86	6.31291e-84
gene-mycla	2822.88	-4.7885	0.298888	-16.0211	9.10773e-58	1.48364e-55
gene-btg2	2953.15	-4.77582	0.240178	-19.8845	5.53785e-88	3.77462e-85
gene-tnfaip1	14.8554	-4.77221	1.54222	-3.09438	0.00197225	0.0050956
gene-vps9d1	2844.6	-4.7637	0.263212	-18.0984	3.28313e-73	1.16488e-70
gene-lima1a	1245.47	-4.76131	0.685606	-6.94468	3.79325e-12	3.63216e-11
gene-LOC566194	707.793	-4.75301	0.354293	-13.4155	4.90769e-41	3.80581e-39
gene-gys2	123.827	-4.74764	0.724506	-6.55293	5.64178e-11	4.70924e-10
gene-mylk5	493.509	-4.74285	0.48726	-9.7337	2.16568e-22	5.2571e-21
gene-aldh18a1	7345.01	-4.73398	0.255344	-18.5396	9.89045e-77	4.06623e-74
gene-znrf3	1050.34	-4.73281	0.44536	-10.6269	2.2334e-26	7.2309e-25
gene-si:ch73-47f2.1	228.526	-4.72602	0.468778	-10.0816	6.66514e-24	1.81338e-22
gene-zgc:163014	552.517	-4.72209	0.335495	-14.075	5.41065e-45	5.11465e-43
gene-si:ch211-241b2.4	380.221	-4.72161	0.406372	-11.619	3.30144e-31	1.46422e-29
gene-cdc34a	1258.93	-4.71282	0.278526	-16.9206	3.17111e-64	7.33348e-62
gene-zgc:92313	2443.8	-4.70694	0.249147	-18.8922	1.32127e-79	6.33745e-77
gene-zgc:165502	42.6531	-4.70662	0.981352	-4.79605	1.61824e-06	7.41971e-06
gene-grin2ab-3	14.1948	-4.7064	1.5134	-3.10982	0.00187199	0.0048603
gene-fscn1a	741.106	-4.69667	0.354929	-13.2327	5.68277e-40	4.07727e-38
gene-nipsnap3a	366.267	-4.69623	0.619482	-7.58091	3.43147e-14	4.06209e-13
gene-alg1	1138.37	-4.69611	0.292073	-16.0786	3.60607e-58	6.02585e-56
gene-rab15	295.978	-4.69468	0.45262	-10.3722	3.31732e-25	9.87608e-24
gene-ids	869.949	-4.69011	0.299929	-15.6374	4.0479e-55	5.99112e-53
gene-oclna	2270.4	-4.68583	0.245277	-19.1042	2.32896e-81	1.18279e-78
gene-ccnb2	6652.29	-4.68145	0.259953	-18.0089	1.65979e-72	5.58315e-70
gene-zgc:153952	2937.19	-4.67383	0.272519	-17.1505	6.2353e-66	1.52359e-63
gene-zgc:152977	4096.9	-4.65996	0.279164	-16.6925	1.48511e-62	3.12731e-60
gene-trim35-27	153.44	-4.65862	0.700979	-6.64588	3.01419e-11	2.59113e-10
gene-zgc:101765-2	293.764	-4.65789	0.61476	-7.57676	3.54297e-14	4.19025e-13
gene-ildr1b	1140.71	-4.65159	0.314214	-14.8039	1.38222e-49	1.53652e-47
gene-llgl1	3798.2	-4.6489	0.289882	-16.0372	7.02353e-58	1.1587e-55
gene-zgc:158852	1158.66	-4.64392	0.307271	-15.1134	1.32052e-51	1.6523e-49
gene-si:ch211-106e7.2	3148.39	-4.62638	0.266925	-17.3321	2.69116e-67	7.33723e-65
gene-dnajc25-2	139.807	-4.62579	0.608733	-7.59904	2.9834e-14	3.55279e-13
gene-zgc:174935	331.938	-4.6147	0.416245	-11.0865	1.45899e-28	5.48466e-27
gene-ddx28-2	426.586	-4.61425	0.525909	-8.77385	1.72657e-18	3.05672e-17
gene-si:dkeyp-120h9.1	1228.93	-4.61348	0.279922	-16.4813	4.99799e-61	9.8819e-59
gene-LOC101883897	73.6158	-4.61187	0.79653	-5.78995	7.04063e-09	4.54308e-08
gene-sall4	5587.99	-4.61129	0.381404	-12.0903	1.18836e-33	5.90781e-32
gene-bzw1b	3549.97	-4.60945	0.328434	-14.0346	9.57094e-45	8.94935e-43
gene-rrbp1b-2	742.336	-4.59678	0.683824	-6.72217	1.79034e-11	1.58319e-10
gene-cited1	559.33	-4.59455	0.326324	-14.0797	5.06129e-45	4.80193e-43
gene-sh3d21	516.653	-4.59172	0.392207	-11.7074	1.16841e-31	5.30929e-30
gene-htr5aa	66.3713	-4.58794	0.802577	-5.71651	1.08733e-08	6.86064e-08
gene-plscr3b	1096.49	-4.57404	0.542668	-8.42879	3.49247e-17	5.50905e-16
gene-si:dkey-256h2.1	3540.68	-4.56708	0.459224	-9.94523	2.64559e-23	6.88678e-22
gene-zgc:66455	1125.28	-4.56593	0.755379	-6.04455	1.49826e-09	1.05769e-08
gene-cyp19a1a-2	19.1947	-4.56428	1.34899	-3.38347	0.000715755	0.00203633
gene-ndrg1b	548.965	-4.56063	0.442134	-10.315	6.02631e-25	1.7637e-23
gene-si:ch73-350k19.1	19.1269	-4.55803	1.3174	-3.45988	0.000540418	0.00157469
gene-engl	266.111	-4.55706	0.847175	-5.37913	7.48466e-08	4.19248e-07
gene-chtf8-2	79.7011	-4.55555	1.0344	-4.40403	1.06256e-05	4.25501e-05
gene-spire1a-2	38.1384	-4.5551	1.22742	-3.71112	0.000206347	0.000654814
gene-zgc:66024	1333.61	-4.55008	0.419635	-10.843	2.15382e-27	7.48807e-26
gene-timm10b	286.903	-4.53865	0.41683	-10.8885	1.30774e-27	4.63362e-26
gene-slc25a25a	5189.48	-4.53082	0.219784	-20.6149	2.01833e-94	1.68635e-91
gene-fam89a	572.524	-4.52199	0.326544	-13.848	1.30765e-43	1.14812e-41
gene-eomesa	1271.8	-4.52152	0.27156	-16.6502	3.01728e-62	6.30246e-60
gene-mcoln2	530.749	-4.51963	0.34401	-13.1381	1.99224e-39	1.37971e-37
gene-slc35e3	208.317	-4.51916	0.595567	-7.588	3.24883e-14	3.86e-13
gene-rasl11b	329.695	-4.5125	0.580918	-7.76788	7.98129e-15	1.00157e-13
gene-ccdc102a	1127.26	-4.49928	0.277619	-16.2067	4.52196e-59	7.91373e-57
gene-gtf2a1l	291.399	-4.49361	0.560787	-8.01305	1.11896e-15	1.52538e-14
gene-hsp90b1-2	2752.17	-4.4885	1.26667	-3.54355	0.000394782	0.00118102
gene-si:ch211-214c7.4	2658.47	-4.47715	0.290509	-15.4114	1.37181e-53	1.841e-51
gene-npm2a	246.546	-4.47407	0.520804	-8.59069	8.64504e-18	1.44461e-16
gene-orc1-2	1604.84	-4.46847	0.476166	-9.38427	6.33561e-21	1.39658e-19
gene-fam169ab	179.256	-4.46647	1.15533	-3.86597	0.000110648	0.000370508
gene-bokb	661.691	-4.46592	0.338999	-13.1739	1.24095e-39	8.75797e-38
gene-sema5a	766.592	-4.45479	0.79727	-5.58755	2.30289e-08	1.38811e-07
gene-tmem70	458.431	-4.45305	0.372025	-11.9698	5.11795e-33	2.46394e-31
gene-ankrd22	557.46	-4.44896	0.327088	-13.6017	3.9099e-42	3.19464e-40
gene-myo1eb-2	227.365	-4.44841	0.430529	-10.3324	5.02696e-25	1.48127e-23
gene-sh3bp5b	1033.84	-4.44624	0.285628	-15.5666	1.22842e-54	1.73865e-52
gene-rgs2-2	53.8465	-4.4447	0.79467	-5.59314	2.23001e-08	1.34794e-07
gene-foxa-3	23.8346	-4.44415	1.19232	-3.72732	0.000193524	0.000617376
gene-znf710a	876.306	-4.44161	0.300278	-14.7916	1.65842e-49	1.82786e-47
gene-plekhm2	3214.45	-4.43557	0.348107	-12.742	3.45558e-37	2.14122e-35
gene-si:ch211-175m2.5-2	58.6103	-4.43556	0.805736	-5.50497	3.69224e-08	2.15826e-07
gene-ugt2a2	76.3757	-4.43461	0.903494	-4.90829	9.18758e-07	4.35838e-06
gene-pycr1b	1416.9	-4.43318	0.474627	-9.34034	9.60291e-21	2.08487e-19
gene-ntn4-2	82.6186	-4.42856	0.765932	-5.78193	7.38506e-09	4.75231e-08
gene-sardh-2	462.797	-4.42089	0.335799	-13.1653	1.39007e-39	9.75724e-38
gene-socs1a	269.257	-4.41954	0.648498	-6.81504	9.42355e-12	8.63081e-11
gene-si:dkey-14o18.2	17.6806	-4.41423	1.32872	-3.32218	0.000893186	0.00249079
gene-tmem177	63.6546	-4.41336	1.18274	-3.73146	0.000190371	0.000608064
gene-sec61a1l	4164.58	-4.4126	0.35187	-12.5404	4.4861e-36	2.65284e-34
gene-si:ch211-261a10.5	92.3071	-4.4059	0.670821	-6.56791	5.10247e-11	4.28949e-10
gene-scarb1	4466.2	-4.40315	0.336222	-13.096	3.47222e-39	2.36047e-37
gene-pus3	1324.05	-4.39966	0.349854	-12.5757	2.87182e-36	1.70995e-34
gene-zgc:92591	448.79	-4.38878	0.415149	-10.5716	4.03672e-26	1.2908e-24
gene-myo1eb	284.546	-4.38505	0.418961	-10.4665	1.23156e-25	3.77945e-24
gene-p4hb	2776.72	-4.38458	0.741029	-5.91689	3.28092e-09	2.21936e-08
gene-rrbp1b	1109.83	-4.38365	0.273377	-16.0352	7.25867e-58	1.18992e-55
gene-pofut1	640.06	-4.37083	0.382847	-11.4166	3.45295e-30	1.44483e-28
gene-ppp4ca	1793.18	-4.36685	0.27379	-15.9496	2.86727e-57	4.58427e-55
gene-si:rp71-46j2.7	979.07	-4.36349	0.304016	-14.3528	1.02276e-46	1.05121e-44
gene-las1l	346.803	-4.35694	0.565494	-7.70467	1.31181e-14	1.61258e-13
gene-aifm1	213.895	-4.35627	0.532181	-8.18569	2.7075e-16	3.95081e-15
gene-neu3.2	27.0811	-4.35175	1.396	-3.1173	0.00182517	0.00474969
gene-LOC100333048	261.706	-4.34692	0.411221	-10.5708	4.07151e-26	1.30032e-24
gene-lmcd1	306.916	-4.3421	0.385403	-11.2664	1.92333e-29	7.66403e-28
gene-tnfaip8l1	962.045	-4.34159	0.324134	-13.3945	6.51557e-41	4.97817e-39
gene-LOC797085	848.769	-4.34152	0.390968	-11.1045	1.19264e-28	4.51615e-27
gene-foxo3a	802.909	-4.34018	0.337665	-12.8535	8.21716e-38	5.26813e-36
gene-faub-2	637.669	-4.33712	0.540302	-8.02722	9.97077e-16	1.36932e-14
gene-pdia2	110.804	-4.33622	0.67137	-6.45876	1.05565e-10	8.55256e-10
gene-wee2-2	2524.2	-4.33403	0.421159	-10.2907	7.75815e-25	2.24268e-23
gene-tom1	870.002	-4.33307	0.360254	-12.0278	2.53836e-33	1.24284e-31
gene-spsb4a	54.8442	-4.32495	0.785197	-5.50811	3.62697e-08	2.12155e-07
gene-btg3-2	514.686	-4.32444	0.499842	-8.65163	5.0768e-18	8.62822e-17
gene-zgc:136858	266.947	-4.32423	0.785661	-5.50394	3.71387e-08	2.16846e-07
gene-klhl35	447.883	-4.3229	0.461125	-9.37468	6.93835e-21	1.52168e-19
gene-tmem243a-2	43.9857	-4.32073	0.846672	-5.10319	3.33971e-07	1.69645e-06
gene-nasp-2	3696.5	-4.31981	0.234635	-18.4107	1.07751e-75	4.16548e-73
gene-si:ch211-269i23.2	129.349	-4.31637	0.867373	-4.97637	6.47869e-07	3.15582e-06
gene-acsf3-2	81.648	-4.31509	0.666453	-6.4747	9.49976e-11	7.73753e-10
gene-trim16	554.25	-4.30773	0.343572	-12.5381	4.6206e-36	2.72615e-34
gene-etv5a-3	558.919	-4.30743	0.555888	-7.74873	9.28125e-15	1.15685e-13
gene-zgc:174164	656.415	-4.3048	0.347903	-12.3736	3.63286e-35	1.99353e-33
gene-pdlim2	919.084	-4.30249	0.426552	-10.0867	6.32716e-24	1.72505e-22
gene-cyp2y3	75.225	-4.29848	0.680303	-6.31849	2.64139e-10	2.04528e-09
gene-lmo4b	168.321	-4.29335	0.503087	-8.53401	1.41361e-17	2.31852e-16
gene-gdf9	576.154	-4.29312	0.478974	-8.96316	3.15509e-19	5.97368e-18
gene-uck2a-2	652.934	-4.2911	0.346346	-12.3896	2.97448e-35	1.64269e-33
gene-frmpd4	807.873	-4.2859	0.336713	-12.7287	4.09797e-37	2.52718e-35
gene-fgd4b	822.184	-4.28484	0.289591	-14.7962	1.55078e-49	1.71653e-47
gene-fam160a1a-2	143.601	-4.28118	0.903202	-4.74	2.13717e-06	9.61522e-06
gene-dusp4-2	71.5392	-4.27921	1.28693	-3.32514	0.000883741	0.00246764
gene-si:ch211-264e16.2-2	21.6663	-4.27773	1.25345	-3.41275	0.0006431	0.00184749
gene-sh3yl1	447.027	-4.2716	0.382125	-11.1786	5.19314e-29	2.0016e-27
gene-ankrd9	31.6268	-4.27144	1.15929	-3.68453	0.000229129	0.000719964
gene-cmah	206.356	-4.26957	0.770596	-5.5406	3.01432e-08	1.78618e-07
gene-galcb	1478	-4.26439	0.284796	-14.9735	1.0945e-50	1.30639e-48
gene-ajuba	1098.93	-4.26259	0.347066	-12.2818	1.13467e-34	6.07215e-33
gene-slc4a2b	2329.52	-4.26243	0.391893	-10.8765	1.49181e-27	5.25706e-26
gene-ociad1	1217.77	-4.26132	0.269401	-15.8177	2.34793e-56	3.59844e-54
gene-snai1a	495.389	-4.26102	0.352915	-12.0738	1.45289e-33	7.15425e-32
gene-si:dkey-42i9.8	532.69	-4.25418	0.438397	-9.70395	2.90054e-22	7.00811e-21
gene-znf395a	2226.81	-4.25089	0.286708	-14.8265	9.86821e-50	1.11129e-47
gene-homeza	152.533	-4.24491	0.52368	-8.10592	5.23465e-16	7.42106e-15
gene-ppfibp1a-2	253.725	-4.24305	0.695361	-6.10195	1.04784e-09	7.56201e-09
gene-sinup	1017.88	-4.23015	0.360892	-11.7214	9.90562e-32	4.53296e-30
gene-csf3b	92.7313	-4.22755	0.614652	-6.87797	6.07132e-12	5.6914e-11
gene-qtrt1	415.394	-4.22546	0.378303	-11.1695	5.74849e-29	2.21236e-27
gene-fads6	61.8804	-4.22111	1.37352	-3.07322	0.00211765	0.00543169
gene-pik3r5-2	189.082	-4.21123	0.470912	-8.9427	3.79765e-19	7.13292e-18
gene-si:dkey-44g23.5-2	140.105	-4.20885	0.714086	-5.89403	3.76883e-09	2.52109e-08
gene-tspan13a	539.529	-4.20756	0.334845	-12.5657	3.26125e-36	1.93738e-34
gene-hyou1	3535.62	-4.20692	0.337791	-12.4542	1.32689e-35	7.53679e-34
gene-grin3ba	303.95	-4.20659	0.506098	-8.3118	9.42596e-17	1.4294e-15
gene-zdhhc24	137.795	-4.20599	0.876948	-4.79617	1.61731e-06	7.41677e-06
gene-trit1-2	92.1946	-4.20463	1.32601	-3.17088	0.00151977	0.00401793
gene-si:dkey-38p12.3-2	174.322	-4.19946	1.13718	-3.69286	0.000221748	0.000698723
gene-rogdi	1116.92	-4.19009	0.277832	-15.0814	2.14815e-51	2.66216e-49
gene-ftsj1-2	81.6166	-4.18747	1.36118	-3.07636	0.00209545	0.00537902
gene-cnpy2	195.712	-4.18638	0.505013	-8.28965	1.13579e-16	1.70539e-15
gene-dusp1	2988.2	-4.18356	0.230683	-18.1355	1.67191e-73	6.09916e-71
gene-acadl	93.8655	-4.17887	0.716337	-5.83366	5.42251e-09	3.55836e-08
gene-si:dkey-85k15.4	258.342	-4.17841	0.518018	-8.06616	7.2546e-16	1.01022e-14
gene-rpain	570.755	-4.17784	0.344517	-12.1266	7.63225e-34	3.84597e-32
gene-plpp5	517.652	-4.17689	0.352672	-11.8436	2.32356e-32	1.07854e-30
gene-zgc:172323	97.3439	-4.17631	0.899034	-4.64534	3.39524e-06	1.48072e-05
gene-svopl	127.107	-4.17457	0.692905	-6.02474	1.69385e-09	1.18799e-08
gene-fhdc2	978.52	-4.17412	0.328354	-12.7122	5.05594e-37	3.10317e-35
gene-pdia4	4299.73	-4.1672	0.308782	-13.4956	1.65952e-41	1.32664e-39
gene-zgc:91908	1120.47	-4.16656	0.280041	-14.8784	4.55184e-50	5.23988e-48
gene-pprc1	3102.65	-4.16539	0.325098	-12.8127	1.39173e-37	8.8568e-36
gene-prickle2a	343.314	-4.16428	0.380718	-10.938	7.58934e-28	2.73016e-26
gene-mctp2b	1132.8	-4.1616	0.268476	-15.5008	3.42629e-54	4.74569e-52
gene-slc39a13	1626.06	-4.16137	0.256519	-16.2225	3.49725e-59	6.16205e-57
gene-zgc:174906	524.208	-4.16109	0.514804	-8.08286	6.32642e-16	8.87106e-15
gene-tarbp2	1010.02	-4.15718	0.269585	-15.4207	1.1887e-53	1.60357e-51
gene-luzp1	3035.19	-4.15461	0.474422	-8.75721	2.00145e-18	3.52651e-17
gene-si:ch211-251f6.6	91.4886	-4.15348	1.30827	-3.17479	0.00149947	0.0039679
gene-orc6	1540.67	-4.15	0.341238	-12.1616	4.97739e-34	2.54279e-32
gene-slc1a2b	74.6484	-4.14974	0.794912	-5.22038	1.78554e-07	9.44012e-07
gene-cdk8	34	-4.1414	1.13239	-3.65721	0.00025498	0.000793587
gene-LOC553492	2280.2	-4.13861	0.320837	-12.8994	4.53434e-38	2.94346e-36
gene-si:rp71-84d19.3	64.5903	-4.1382	1.26979	-3.25896	0.0011182	0.00305092
gene-lmbr1l	720.82	-4.12899	0.423264	-9.75512	1.7539e-22	4.28563e-21
gene-kcnk6	996.525	-4.12624	0.385158	-10.7131	8.83476e-27	2.92995e-25
gene-LOC794432	19.3422	-4.12528	1.20029	-3.43691	0.000588395	0.00170223
gene-tia1-4	154.397	-4.12276	0.847738	-4.86324	1.15477e-06	5.40863e-06
gene-acsf2	653.745	-4.12033	0.314555	-13.0989	3.33945e-39	2.27619e-37
gene-tram1	690.876	-4.1187	0.528249	-7.79689	6.34491e-15	8.04797e-14
gene-dok1a	72.1009	-4.11833	0.876226	-4.70008	2.60059e-06	1.15576e-05
gene-smcr8a	1366.62	-4.11373	0.266969	-15.409	1.42321e-53	1.90013e-51
gene-stard14-2	353.751	-4.11179	0.364732	-11.2734	1.7749e-29	7.10537e-28
gene-pigw	390.056	-4.10861	0.371657	-11.0548	2.0771e-28	7.69655e-27
gene-ppp1r3ca-2	91.9121	-4.10743	0.879559	-4.66988	3.01374e-06	1.32505e-05
gene-cnih1	1437.77	-4.10536	0.355265	-11.5557	6.90441e-31	3.00556e-29
gene-cdt1	3084.55	-4.10131	0.255495	-16.0524	5.50154e-58	9.13432e-56
gene-LOC571582-2	19.0214	-4.09906	1.22157	-3.35557	0.000792022	0.00223198
gene-spint2	383.555	-4.09856	0.431408	-9.50043	2.09022e-21	4.76573e-20
gene-LOC110438429	23.3013	-4.09835	1.19143	-3.43986	0.000582012	0.00168564
gene-tdgf1	487.31	-4.09719	0.393067	-10.4236	1.934e-25	5.87252e-24
gene-plcd1b	1954.95	-4.0967	0.262889	-15.5834	9.44566e-55	1.34424e-52
gene-papd7	3511.66	-4.08909	0.31009	-13.1868	1.04585e-39	7.4419e-38
gene-slc9a2	142.23	-4.08645	0.591636	-6.90703	4.94914e-12	4.68351e-11
gene-slc12a8	342.708	-4.08047	0.564053	-7.2342	4.68289e-13	4.93255e-12
gene-acadl-2	60.1232	-4.07855	0.823366	-4.95351	7.2886e-07	3.5168e-06
gene-hbegfa	719.042	-4.07776	0.386866	-10.5405	5.61942e-26	1.77067e-24
gene-tnfsf10l4	41.3803	-4.0772	0.947016	-4.30532	1.66746e-05	6.46829e-05
gene-LOC108191695	251.554	-4.07543	0.577224	-7.06039	1.66035e-12	1.65658e-11
gene-zgc:163030	632.058	-4.07267	0.408346	-9.97358	1.9893e-23	5.23096e-22
gene-trim35-24	23.2007	-4.07048	1.10825	-3.67288	0.000239834	0.000750414
gene-zfand5b	3838.9	-4.07041	0.303841	-13.3965	6.33767e-41	4.87098e-39
gene-neurod6a	209.147	-4.06762	0.555667	-7.32026	2.47496e-13	2.67322e-12
gene-gyg1a	4659.06	-4.06513	0.335552	-12.1148	8.82015e-34	4.41025e-32
gene-rab25b	54.8056	-4.06314	0.826553	-4.91576	8.84384e-07	4.20688e-06
gene-zgc:165514	286.617	-4.06013	0.388201	-10.4588	1.33493e-25	4.08219e-24
gene-st3gal1	580.191	-4.05793	0.445248	-9.11385	7.95061e-20	1.58529e-18
gene-pithd1	251.262	-4.05666	0.592772	-6.84354	7.72584e-12	7.1569e-11
gene-asah1a-2	265.582	-4.05665	0.673831	-6.02029	1.74107e-09	1.21913e-08
gene-gtf2f2b	52.0008	-4.05532	0.947812	-4.27862	1.88059e-05	7.24086e-05
gene-homer2	65.2069	-4.05101	0.824305	-4.91445	8.90327e-07	4.23249e-06
gene-arpp21	386.581	-4.04954	0.358938	-11.282	1.61056e-29	6.45745e-28
gene-extl2	425.231	-4.04481	0.36602	-11.0508	2.17358e-28	8.01964e-27
gene-rem1	266.741	-4.0426	0.491742	-8.22098	2.01854e-16	2.98584e-15
gene-c23h20orf24	985.071	-4.04192	0.312958	-12.9152	3.69485e-38	2.41059e-36
gene-tmem243a	72.9334	-4.04084	0.652378	-6.19402	5.86503e-10	4.35522e-09
gene-ipmkb	999.288	-4.04032	0.267281	-15.1164	1.26265e-51	1.58756e-49
gene-homeza-2	608.35	-4.03986	0.36965	-10.9289	8.38758e-28	3.00896e-26
gene-hsp90b1	3050.63	-4.03801	0.447616	-9.02114	1.86144e-19	3.58462e-18
gene-ildr1a	500.998	-4.03451	0.37056	-10.8876	1.32038e-27	4.67203e-26
gene-id2a	922.813	-4.03314	0.301152	-13.3924	6.69889e-41	5.10317e-39
gene-si:ch211-106e7.2-2	691.027	-4.03298	0.356257	-11.3204	1.03961e-29	4.20075e-28
gene-hmgb3b	1055.44	-4.02993	0.307849	-13.0906	3.72758e-39	2.52744e-37
gene-supv3l1-2	622.068	-4.02538	0.412846	-9.75033	1.83876e-22	4.48454e-21
gene-hnrnpc	58.4535	-4.01754	0.71743	-5.59991	2.14465e-08	1.29999e-07
gene-stard14	329.959	-4.01452	0.394871	-10.1667	2.79339e-24	7.77973e-23
gene-gemin8-2	179.261	-4.01438	0.794406	-5.05331	4.34218e-07	2.17159e-06
gene-cox17	258.263	-4.01285	0.483797	-8.29449	1.09055e-16	1.64032e-15
gene-tmtc2b	167.11	-4.01019	0.502562	-7.97948	1.46946e-15	1.98231e-14
gene-si:dkeyp-2e4.2	247.96	-4.00604	0.456766	-8.77044	1.77968e-18	3.1443e-17
gene-st3gal5	671.926	-4.00465	0.529503	-7.56305	3.93739e-14	4.62925e-13
gene-rab3db	223.818	-4.00292	0.433386	-9.23637	2.54998e-20	5.30498e-19
gene-grip2a	1292.64	-3.99846	0.43025	-9.29333	1.49529e-20	3.19286e-19
gene-cept1a	908.743	-3.99758	0.273725	-14.6044	2.63387e-48	2.8074e-46
gene-pacs1a-2	87.1181	-3.99396	0.715147	-5.58481	2.33957e-08	1.40924e-07
gene-atad5b	272.825	-3.99206	0.852045	-4.68526	2.79599e-06	1.23603e-05
gene-si:ch73-366l1.5	72.1003	-3.98852	0.830837	-4.80061	1.58187e-06	7.25681e-06
gene-wdr41	267.651	-3.98836	0.406797	-9.80431	1.07882e-22	2.68937e-21
gene-sh3d19-3	459.747	-3.98699	0.380479	-10.4789	1.08029e-25	3.32312e-24
gene-si:ch211-202f5.3-2	225.517	-3.98654	0.77091	-5.17121	2.32583e-07	1.21185e-06
gene-si:dkey-61l1.4	51.5911	-3.98614	1.0001	-3.98575	6.72684e-05	0.000233555
gene-im:7136940	486.356	-3.98558	0.355386	-11.2148	3.44957e-29	1.34762e-27
gene-xpo4	258.867	-3.98064	0.420011	-9.47747	2.60524e-21	5.89846e-20
gene-pon3.2	399.484	-3.98055	0.400781	-9.932	3.02126e-23	7.81754e-22
gene-tram2	2095.26	-3.97898	0.279107	-14.2561	4.10635e-46	4.10651e-44
gene-si:ch211-175m2.5	274.02	-3.97388	0.506344	-7.84818	4.22118e-15	5.45301e-14
gene-gpr137c	1637.75	-3.97348	0.243782	-16.2993	9.98016e-60	1.8204e-57
gene-tshz3a	503.469	-3.97265	0.372431	-10.6668	1.4555e-26	4.75998e-25
gene-bora	270.829	-3.97105	0.63288	-6.27458	3.50588e-10	2.67943e-09
gene-rheb	222.548	-3.96712	0.466109	-8.51115	1.72217e-17	2.78091e-16
gene-tnika	1499.1	-3.96667	0.33469	-11.8518	2.10674e-32	9.79652e-31
gene-unc5c	118.438	-3.95691	0.611743	-6.46825	9.91418e-11	8.05733e-10
gene-LOC110437957	151.139	-3.95409	0.523799	-7.54887	4.39059e-14	5.12024e-13
gene-dnmt1	15009	-3.95154	0.292729	-13.499	1.58599e-41	1.28371e-39
gene-mrps6	184.916	-3.94874	0.523205	-7.54721	4.44673e-14	5.18105e-13
gene-ctsba	5252.07	-3.94143	0.390888	-10.0833	6.5502e-24	1.78398e-22
gene-erap1b	1575.26	-3.93896	0.421047	-9.35516	8.34738e-21	1.82145e-19
gene-rab11fip1a	710.102	-3.93805	0.393835	-9.99923	1.53584e-23	4.09257e-22
gene-gale	571.465	-3.93721	0.330445	-11.9149	9.90241e-33	4.69748e-31
gene-st3gal8	901.576	-3.93022	0.362381	-10.8456	2.09365e-27	7.29848e-26
gene-slc35c2-2	199.36	-3.92982	0.459349	-8.5552	1.17666e-17	1.94491e-16
gene-enpp1	500.467	-3.92935	0.489111	-8.03365	9.46145e-16	1.30282e-14
gene-tmem238b	101.805	-3.92857	0.55924	-7.02484	2.14308e-12	2.11539e-11
gene-setd4	1369.06	-3.92283	0.300372	-13.0599	5.582e-39	3.75531e-37
gene-baiap2l1b	688.467	-3.92276	0.310041	-12.6524	1.08484e-36	6.54977e-35
gene-LOC101885164	523.589	-3.92088	0.647161	-6.05859	1.3732e-09	9.75248e-09
gene-tmem55ba-2	38.5683	-3.92021	1.24952	-3.13739	0.00170461	0.00446467
gene-aqp7	90.6848	-3.91976	1.05988	-3.69829	0.000217054	0.000685014
gene-pfkfb1	268.966	-3.91887	0.464722	-8.43271	3.37746e-17	5.33738e-16
gene-tmed5	710.176	-3.91687	0.361923	-10.8224	2.69736e-27	9.27812e-26
gene-stard10	150.405	-3.91521	0.595179	-6.5782	4.76175e-11	4.01479e-10
gene-svopl-2	169.813	-3.91475	0.612151	-6.39507	1.60469e-10	1.27182e-09
gene-znrf2a	250.45	-3.91302	0.480975	-8.13561	4.09869e-16	5.8782e-15
gene-si:ch1073-416j23.1	604.566	-3.91286	0.329216	-11.8854	1.40969e-32	6.6026e-31
gene-mtmr7a	236.919	-3.91131	0.649829	-6.01898	1.75518e-09	1.22734e-08
gene-cpdb	2370.84	-3.91035	0.363219	-10.7658	4.99261e-27	1.68596e-25
gene-zgc:77151	845.078	-3.9103	0.354656	-11.0256	2.87507e-28	1.05031e-26
gene-ric3a-2	62.5908	-3.90894	0.692597	-5.64388	1.66256e-08	1.02091e-07
gene-cyp2x7	54.5975	-3.90424	1.25939	-3.10011	0.00193448	0.00500748
gene-zgc:158343-3	148.444	-3.90002	1.21157	-3.21899	0.00128645	0.00346078
gene-tmem5	61.6835	-3.89956	1.05174	-3.70772	0.000209135	0.000662444
gene-dennd6b	1188.12	-3.89864	0.291568	-13.3713	8.89779e-41	6.69946e-39
gene-slc6a3	29.2894	-3.89818	1.01401	-3.84433	0.000120885	0.000402136
gene-casd1	4282.25	-3.89642	0.24395	-15.9722	1.99495e-57	3.20939e-55
gene-f11r.1	614.894	-3.89367	0.300455	-12.9592	2.08302e-38	1.37985e-36
gene-si:dkeyp-13a3.10	338.646	-3.89302	0.368376	-10.568	4.19125e-26	1.33527e-24
gene-rcor1	1602.74	-3.89025	0.247091	-15.7442	7.52571e-56	1.12673e-53
gene-LOC103909531	37.3623	-3.88696	0.870301	-4.46622	7.96135e-06	3.26898e-05
gene-efhd1	171.799	-3.88499	0.532316	-7.29827	2.91491e-13	3.12109e-12
gene-rhbdl2	108.025	-3.88485	0.562846	-6.90217	5.12159e-12	4.83963e-11
gene-snupn	954.922	-3.88083	0.272449	-14.2443	4.8657e-46	4.8286e-44
gene-slc38a7	1110.19	-3.878	0.29707	-13.0542	6.01597e-39	4.02635e-37
gene-prmt7-3	714.458	-3.87726	0.378622	-10.2405	1.30627e-24	3.72208e-23
gene-ngfa	32.5762	-3.87517	0.955655	-4.05499	5.01363e-05	0.00017845
gene-pik3cd	511.996	-3.87467	0.427753	-9.05819	1.32637e-19	2.58887e-18
gene-slc39a11	49.7638	-3.87318	0.826541	-4.68601	2.78579e-06	1.23236e-05
gene-etv5b-2	353.279	-3.86952	0.521485	-7.4202	1.16945e-13	1.30279e-12
gene-atpif1a	174.103	-3.86819	0.862001	-4.48746	7.20787e-06	2.98086e-05
gene-prrg2	956.563	-3.86764	0.406128	-9.5232	1.67919e-21	3.8455e-20
gene-p4hb-2	2525.67	-3.85973	0.373798	-10.3257	5.39217e-25	1.58527e-23
gene-myof	3256.61	-3.85936	0.449321	-8.58932	8.74869e-18	1.46099e-16
gene-ccdc58	212.653	-3.8566	0.463674	-8.31749	8.98491e-17	1.36572e-15
gene-naalad2	220.149	-3.85258	0.653059	-5.89929	3.65065e-09	2.44709e-08
gene-hs3st1	483.38	-3.85149	0.489064	-7.87522	3.40148e-15	4.43614e-14
gene-fam129bb-3	226.248	-3.84968	0.79893	-4.81854	1.4461e-06	6.67059e-06
gene-LOC108179755	32.8473	-3.84907	1.01361	-3.79737	0.000146238	0.000478548
gene-nxph1	48.8109	-3.84906	0.894559	-4.30275	1.68695e-05	6.53705e-05
gene-wdr20a	1200.73	-3.8434	0.289527	-13.2748	3.24343e-40	2.36642e-38
gene-rpz2	433.599	-3.84132	0.402933	-9.53341	1.52201e-21	3.49482e-20
gene-si:ch211-189e2.3-2	2101.39	-3.83995	0.364963	-10.5215	6.8776e-26	2.15401e-24
gene-ino80db	1240.85	-3.83918	0.41795	-9.18574	4.08696e-20	8.33514e-19
gene-treh	375.109	-3.83908	0.385195	-9.96658	2.13462e-23	5.58473e-22
gene-cyp1a	68.4711	-3.83612	0.720337	-5.32545	1.00704e-07	5.54142e-07
gene-kifc3	1709.18	-3.83603	0.247816	-15.4794	4.78088e-54	6.55183e-52
gene-zbtb2a	659.981	-3.83454	0.314189	-12.2046	2.93822e-34	1.52511e-32
gene-hmha1b	982.379	-3.83449	0.37421	-10.2469	1.22189e-24	3.49318e-23
gene-eepd1	366.018	-3.83443	0.35424	-10.8244	2.63817e-27	9.08661e-26
gene-gpr161	284.878	-3.83073	0.413309	-9.26844	1.88882e-20	3.96775e-19
gene-ranbp10	219.019	-3.83028	0.408301	-9.38103	6.53334e-21	1.43772e-19
gene-sdr39u1	58.7368	-3.83002	0.87468	-4.37876	1.19355e-05	4.73998e-05
gene-org	3797.19	-3.82936	0.225645	-16.9708	1.35185e-64	3.18312e-62
gene-marveld3	355.521	-3.82513	0.361378	-10.5848	3.50387e-26	1.1218e-24
gene-tmem59l	481.99	-3.82457	0.355972	-10.744	6.3229e-27	2.12136e-25
gene-b3gnt2b	1023.64	-3.81992	0.391475	-9.75775	1.70909e-22	4.18008e-21
gene-lpcat1	833.321	-3.81851	0.276566	-13.8069	2.31725e-43	2.02085e-41
gene-snapc1b	288.136	-3.81578	0.368913	-10.3433	4.48797e-25	1.32849e-23
gene-dnaja3a	282.686	-3.80731	0.683789	-5.56796	2.57736e-08	1.54243e-07
gene-waslb	790.366	-3.80468	0.286344	-13.2871	2.75093e-40	2.01846e-38
gene-c24h7orf50	132.743	-3.80464	0.683111	-5.56957	2.55367e-08	1.52931e-07
gene-akip1-3	86.0178	-3.80336	0.590791	-6.43774	1.21265e-10	9.74525e-10
gene-znf503	280.922	-3.80164	0.379399	-10.0202	1.24308e-23	3.33302e-22
gene-eif4e1c	15.6576	-3.80156	1.26379	-3.00806	0.00262923	0.00659496
gene-slc1a8a	27.0109	-3.79966	1.02461	-3.70842	0.000208558	0.000661019
gene-prkcha	412.862	-3.79634	0.387976	-9.78499	1.3061e-22	3.23726e-21
gene-mrps36	60.3041	-3.79397	0.993333	-3.81943	0.000133761	0.000441176
gene-si:ch73-308m11.1	35.7646	-3.79093	1.17526	-3.22561	0.00125704	0.00338871
gene-mfsd6b	303.549	-3.78832	0.411235	-9.21205	3.19953e-20	6.59802e-19
gene-si:dkey-12e7.1	129.513	-3.78482	0.706095	-5.36021	8.31232e-08	4.63204e-07
gene-elovl7a	34.5035	-3.78465	0.911727	-4.15108	3.30905e-05	0.000121813
gene-prmt6	861.565	-3.78392	0.332563	-11.3781	5.37876e-30	2.23262e-28
gene-LOC101886286	76.56	-3.78355	0.687686	-5.50186	3.75796e-08	2.19272e-07
gene-lcmt2	131.037	-3.7825	0.509971	-7.41709	1.19725e-13	1.33147e-12
gene-ypel3	1091.17	-3.78191	0.293116	-12.9025	4.35921e-38	2.83688e-36
gene-tspan36-2	326.971	-3.7796	0.877377	-4.30784	1.64859e-05	6.40084e-05
gene-ankha	965.726	-3.77876	0.274016	-13.7903	2.91667e-43	2.51816e-41
gene-tatdn2	3881.91	-3.77682	0.284244	-13.2872	2.74559e-40	2.01846e-38
gene-setd8a	905.645	-3.77671	0.305289	-12.3709	3.75575e-35	2.05661e-33
gene-uggt1	3039.74	-3.77432	0.29546	-12.7744	2.27928e-37	1.42943e-35
gene-acsf3-3	106.538	-3.76106	0.547208	-6.87318	6.27877e-12	5.8816e-11
gene-mcl1a	2385.48	-3.76005	0.302102	-12.4463	1.46473e-35	8.30155e-34
gene-qtrtd1	132.501	-3.75633	0.498142	-7.54068	4.67538e-14	5.43524e-13
gene-hrasb	432.393	-3.75215	0.492051	-7.62554	2.43006e-14	2.91663e-13
gene-hid1b	499.641	-3.75071	0.566783	-6.61754	3.65225e-11	3.11174e-10
gene-znf1181	155.46	-3.74956	0.716659	-5.232	1.67688e-07	8.90384e-07
gene-zgc:101016	746.894	-3.74762	0.310672	-12.0629	1.65759e-33	8.14672e-32
gene-synj2bp	786.544	-3.74717	0.282746	-13.2528	4.34786e-40	3.14564e-38
gene-wu:fb63a08	194.732	-3.74488	0.556904	-6.72446	1.76245e-11	1.55906e-10
gene-cdhr5a	26.3121	-3.74377	1.2366	-3.02746	0.00246617	0.00622383
gene-ppp1r15b-2	136.647	-3.74366	0.516841	-7.24335	4.3774e-13	4.62206e-12
gene-smyd5	521.976	-3.74302	0.329513	-11.3593	6.67125e-30	2.74273e-28
gene-zgc:158320	136.254	-3.74258	0.504033	-7.42528	1.12539e-13	1.25587e-12
gene-fbxw11b	36.8395	-3.74036	0.968859	-3.86058	0.000113118	0.000378096
gene-galnt18a	147.624	-3.73444	0.730436	-5.11262	3.17717e-07	1.62088e-06
gene-pvrl1b	322.709	-3.73356	0.403016	-9.26405	1.96821e-20	4.13117e-19
gene-her7	70.3827	-3.72895	0.709447	-5.25613	1.47119e-07	7.88278e-07
gene-nadk2	33.1948	-3.72567	0.914859	-4.0724	4.65313e-05	0.000166626
gene-itprip	761.992	-3.7246	0.282963	-13.1628	1.43595e-39	1.0052e-37
gene-zgc:162936	531.77	-3.72092	0.44494	-8.36274	6.12767e-17	9.43857e-16
gene-pgap2	736.814	-3.7193	0.302408	-12.2989	9.17676e-35	4.94152e-33
gene-vamp8	326.153	-3.71717	0.522393	-7.11566	1.11382e-12	1.12957e-11
gene-rif1	3659.34	-3.71652	0.220825	-16.8302	1.46697e-63	3.24751e-61
gene-hpdl	111.961	-3.71544	0.560716	-6.62623	3.44359e-11	2.94074e-10
gene-ssbp3b	1509.03	-3.7149	0.276881	-13.4169	4.81299e-41	3.74358e-39
gene-zgc:110182	433.476	-3.7139	0.351815	-10.5564	4.74519e-26	1.50251e-24
gene-nup35	1492.96	-3.71268	0.374148	-9.92301	3.30646e-23	8.53844e-22
gene-ppp1r3da	431.804	-3.71168	0.320025	-11.5981	4.21328e-31	1.85592e-29
gene-fgf14	329.564	-3.71074	0.732257	-5.06754	4.02991e-07	2.0252e-06
gene-si:ch73-14h10.2-2	37.4145	-3.70988	0.917272	-4.04448	5.24398e-05	0.000185998
gene-tph1a	146.251	-3.70886	0.703153	-5.27462	1.33034e-07	7.18306e-07
gene-aifm4	389.522	-3.708	0.335537	-11.0509	2.16918e-28	8.01481e-27
gene-fhod1	1298.02	-3.70786	0.358772	-10.3349	4.90133e-25	1.44589e-23
gene-syngr2b	203.47	-3.70663	0.648814	-5.71293	1.11046e-08	6.99808e-08
gene-ptcd1	648.152	-3.70563	0.372943	-9.93616	2.89771e-23	7.52041e-22
gene-im:7147486	2346.47	-3.70563	0.287996	-12.8669	6.91e-38	4.45214e-36
gene-rbpms	175.719	-3.70511	0.550354	-6.73222	1.67088e-11	1.48516e-10
gene-mgarp-2	248.875	-3.70122	0.730726	-5.06512	4.08135e-07	2.04906e-06
gene-tmem203	825.058	-3.69637	0.301835	-12.2463	1.75812e-34	9.31231e-33
gene-fbxo5	2028.53	-3.69606	0.259798	-14.2267	6.25968e-46	6.18824e-44
gene-gemin7	690.631	-3.69448	0.291435	-12.6768	7.94799e-37	4.83241e-35
gene-ptpdc1a	210.775	-3.69293	0.430186	-8.5845	9.1233e-18	1.52061e-16
gene-impdh2	1589.24	-3.69065	0.335384	-11.0043	3.645e-28	1.32226e-26
gene-fam129ba	1333.59	-3.69051	0.293788	-12.5618	3.4238e-36	2.02929e-34
gene-aif1l	2778.03	-3.68918	0.239657	-15.3935	1.80843e-53	2.38981e-51
gene-mcf2la	983.129	-3.68781	0.29495	-12.5032	7.17498e-36	4.15748e-34
gene-drap1	1224	-3.68761	0.289269	-12.748	3.19741e-37	1.986e-35
gene-galnt2	1812.3	-3.68267	0.334872	-10.9973	3.93951e-28	1.4251e-26
gene-anxa13l	54.3196	-3.68218	0.831049	-4.43076	9.39005e-06	3.79959e-05
gene-rap1ab	35.9586	-3.67967	0.863056	-4.26354	2.01212e-05	7.71173e-05
gene-zgc:165573	195.951	-3.67934	0.523628	-7.02663	2.11579e-12	2.08925e-11
gene-tmem263	336.644	-3.67862	0.508003	-7.24135	4.44244e-13	4.68882e-12
gene-fdx1l	292.034	-3.67844	0.395662	-9.29694	1.44546e-20	3.10182e-19
gene-st3gal5-2	337.751	-3.67816	0.422599	-8.70367	3.21332e-18	5.54484e-17
gene-nansa	578.308	-3.67549	0.368865	-9.96432	2.18358e-23	5.70704e-22
gene-bcl9	2151.05	-3.67365	0.272924	-13.4604	2.6763e-41	2.11338e-39
gene-fam76b	1433.96	-3.67125	0.254885	-14.4035	4.91693e-47	5.09414e-45
gene-rnf219	584.059	-3.67047	0.300806	-12.2022	3.02713e-34	1.56498e-32
gene-chek2	431.906	-3.66963	0.797321	-4.60245	4.17541e-06	1.79468e-05
gene-si:dkey-42i9.4	964.621	-3.66895	0.389979	-9.40808	5.05276e-21	1.12336e-19
gene-nags-2	21.8151	-3.66773	1.14789	-3.1952	0.00139732	0.00372844
gene-fbxo43	1846.51	-3.66182	0.243469	-15.0401	4.00682e-51	4.91852e-49
gene-zgc:101800	877.478	-3.65997	0.315812	-11.5891	4.68248e-31	2.05213e-29
gene-alkbh8	583.353	-3.6598	0.374089	-9.78325	1.32877e-22	3.2903e-21
gene-efcab11	937.458	-3.6593	0.362415	-10.097	5.6967e-24	1.55973e-22
gene-dhrs13a.2	913.341	-3.65907	0.27782	-13.1707	1.29455e-39	9.11142e-38
gene-sh3gl2a	142.261	-3.65841	0.547457	-6.68255	2.34818e-11	2.04858e-10
gene-glipr2l	511.997	-3.65721	0.43746	-8.3601	6.26631e-17	9.62655e-16
gene-LOC101884923	567.742	-3.65519	0.389858	-9.3757	6.8721e-21	1.50842e-19
gene-zp2l2	714.144	-3.65314	0.4766	-7.665	1.78831e-14	2.17563e-13
gene-ivns1abpb	4696.78	-3.65291	0.236242	-15.4626	6.20627e-54	8.46045e-52
gene-bag4	588.303	-3.65257	0.351864	-10.3806	3.03797e-25	9.10722e-24
gene-sorbs3	1045.92	-3.6516	0.525516	-6.94861	3.68912e-12	3.53764e-11
gene-tmem53	392.567	-3.65017	0.338425	-10.7858	4.01889e-27	1.36605e-25
gene-abhd17c-2	189.152	-3.64462	0.582542	-6.2564	3.93955e-10	2.99145e-09
gene-slc17a9b	949.849	-3.64309	0.392813	-9.27435	1.78711e-20	3.78787e-19
gene-ntn4	290.287	-3.64265	0.485085	-7.5093	5.94438e-14	6.85204e-13
gene-cx43.4	3990.42	-3.64264	0.254433	-14.3167	1.72125e-46	1.74832e-44
gene-lnpa	793.803	-3.64162	0.320559	-11.3602	6.59833e-30	2.72139e-28
gene-tada1	295.214	-3.64112	0.444757	-8.18677	2.68339e-16	3.91784e-15
gene-LOC108181182	27.9535	-3.6396	1.04345	-3.48803	0.000486591	0.00143235
gene-chst3b	63.7142	-3.63922	0.694141	-5.24276	1.58193e-07	8.43597e-07
gene-srprb	864.413	-3.6381	0.293466	-12.397	2.7137e-35	1.50508e-33
gene-olfm3b	31.2996	-3.63739	1.03048	-3.5298	0.000415873	0.00123967
gene-cited4b	90.4839	-3.63733	0.885724	-4.10662	4.01498e-05	0.000145606
gene-zfhx2	4769.88	-3.63423	0.245461	-14.8057	1.34538e-49	1.50201e-47
gene-zgc:110329	221.762	-3.62954	0.644524	-5.63136	1.78798e-08	1.093e-07
gene-zgc:152986	1541.69	-3.62947	0.290203	-12.5067	6.86288e-36	3.9945e-34
gene-pop1	554.035	-3.62938	0.337878	-10.7417	6.48402e-27	2.1698e-25
gene-rcl1	475.62	-3.62722	0.34582	-10.4887	9.73076e-26	3.01119e-24
gene-phc2a-2	561.942	-3.62608	0.539121	-6.72592	1.74489e-11	1.54563e-10
gene-glceb	1208.54	-3.62602	0.290293	-12.4909	8.36787e-36	4.81636e-34
gene-cldnd1a	178.291	-3.62174	0.451246	-8.02608	1.00634e-15	1.38058e-14
gene-ngef	543.029	-3.61962	0.311741	-11.611	3.62323e-31	1.60145e-29
gene-pttg1ipb	938.718	-3.61891	0.545129	-6.63864	3.16588e-11	2.71162e-10
gene-ccnj	1021.91	-3.61862	0.356785	-10.1423	3.58552e-24	9.93248e-23
gene-LOC103909874	38.211	-3.6186	0.900827	-4.01698	5.89484e-05	0.000206915
gene-ftsj2	202.019	-3.61641	0.447415	-8.08288	6.32537e-16	8.87106e-15
gene-zgc:112399	33.8886	-3.61618	1.16202	-3.11197	0.00185842	0.0048275
gene-cfl1l	1215.8	-3.61471	0.467652	-7.72948	1.07986e-14	1.3389e-13
gene-pald1a	1592.58	-3.61272	0.28361	-12.7384	3.61914e-37	2.23722e-35
gene-fam49bb	219.525	-3.6127	0.461072	-7.83542	4.67274e-15	6.00043e-14
gene-tox4a	114.471	-3.61167	0.567707	-6.36186	1.99323e-10	1.56587e-09
gene-ctsla	4886.45	-3.60923	0.255684	-14.116	3.02816e-45	2.89419e-43
gene-slc1a5	767.121	-3.6089	0.33623	-10.7334	7.09036e-27	2.36964e-25
gene-ripk2	317.204	-3.60886	0.377383	-9.56284	1.14569e-21	2.65425e-20
gene-srsf1a-2	23.5941	-3.60858	1.18407	-3.04761	0.00230669	0.00586545
gene-lmnb1	2919.82	-3.60775	0.232518	-15.516	2.70425e-54	3.78609e-52
gene-zgc:92140	162.351	-3.60737	0.624195	-5.77924	7.50387e-09	4.82636e-08
gene-dnajc6	41.8462	-3.60279	0.849814	-4.2395	2.24018e-05	8.50278e-05
gene-ano9b	291.203	-3.60234	0.495505	-7.27003	3.5941e-13	3.82303e-12
gene-cntn5	158.453	-3.60213	0.632563	-5.6945	1.23734e-08	7.72438e-08
gene-LOC110438237	55.5652	-3.60123	0.783339	-4.59728	4.28051e-06	1.8362e-05
gene-arhgap32a	1085.05	-3.60033	0.465757	-7.73007	1.0749e-14	1.33338e-13
gene-pus1	735.909	-3.59921	0.360847	-9.97435	1.97385e-23	5.19559e-22
gene-LOC101885512	100.59	-3.59813	0.656268	-5.48271	4.18857e-08	2.42703e-07
gene-c1qbp	626.574	-3.59706	0.394611	-9.11546	7.83372e-20	1.56318e-18
gene-fkbp14	256.724	-3.59392	0.39174	-9.17426	4.54681e-20	9.24387e-19
gene-sb:cb288	750.05	-3.59187	0.313693	-11.4503	2.34467e-30	9.98837e-29
gene-fbxl18	646.52	-3.59165	0.406452	-8.83659	9.8684e-19	1.78244e-17
gene-btr12	170.983	-3.58974	0.57426	-6.25107	4.07655e-10	3.08823e-09
gene-si:ch73-106l15.3	322.665	-3.58935	0.37551	-9.55859	1.19372e-21	2.76059e-20
gene-slc25a44b	411.244	-3.58888	0.351826	-10.2007	1.96822e-24	5.5593e-23
gene-LOC101882208	94.8912	-3.58821	0.567064	-6.32771	2.48833e-10	1.93022e-09
gene-herpud1	1565.75	-3.58753	0.288728	-12.4253	1.90591e-35	1.0639e-33
gene-zmp:0000000932	99.507	-3.5863	0.583311	-6.14817	7.83814e-10	5.73815e-09
gene-pqlc1	283.039	-3.5862	0.391021	-9.17139	4.66968e-20	9.46396e-19
gene-plxna1b	844.613	-3.58458	0.481152	-7.44998	9.3355e-14	1.04902e-12
gene-hmgcl	619.84	-3.58266	0.295262	-12.1338	6.98912e-34	3.53565e-32
gene-abracl	546.859	-3.58002	0.329889	-10.8522	1.94686e-27	6.79591e-26
gene-gfral	66.3489	-3.57871	1.21156	-2.9538	0.00313892	0.00770628
gene-nol7	871.946	-3.5779	0.26898	-13.3018	2.26066e-40	1.67296e-38
gene-arl6ip5a-2	65.0762	-3.57641	0.74651	-4.79085	1.6608e-06	7.60543e-06
gene-jpt1b	606.683	-3.57345	0.362978	-9.8448	7.21839e-23	1.82226e-21
gene-si:ch211-129c21.1-2	102.853	-3.57287	0.97423	-3.66737	0.000245054	0.000765455
gene-znhit6	768.822	-3.57153	0.273652	-13.0514	6.24168e-39	4.16664e-37
gene-dap1b	694.563	-3.57133	0.530958	-6.7262	1.74154e-11	1.5432e-10
gene-metrnl	496.207	-3.56874	0.572101	-6.23794	4.43362e-10	3.33823e-09
gene-si:dkey-194g4.1-2	291.297	-3.5687	0.526409	-6.77934	1.20729e-11	1.08955e-10
gene-fbxl14a	744.408	-3.56637	0.506404	-7.04253	1.88778e-12	1.87052e-11
gene-zgc:56676	1098.28	-3.56238	0.318357	-11.1899	4.5709e-29	1.7644e-27
gene-atp1b3b	1409.08	-3.55975	0.352113	-10.1097	5.00567e-24	1.37489e-22
gene-bora-2	223.698	-3.55909	0.570044	-6.24354	4.27781e-10	3.23125e-09
gene-mtmr1b	787.912	-3.55882	0.363365	-9.79405	1.19413e-22	2.96826e-21
gene-dus1l	584.27	-3.55734	0.353657	-10.0587	8.4072e-24	2.27777e-22
gene-gm2a	600.665	-3.55725	0.338321	-10.5144	7.41367e-26	2.3163e-24
gene-epoa	49.2268	-3.55552	0.87464	-4.06513	4.80059e-05	0.000171291
gene-akap1b	2507.95	-3.55529	0.327037	-10.8712	1.58122e-27	5.54196e-26
gene-pgm3	298.627	-3.55413	0.388058	-9.15874	5.25046e-20	1.06078e-18
gene-dcbld1	399.223	-3.55413	0.409246	-8.68458	3.80155e-18	6.52079e-17
gene-szrd1	202.969	-3.55266	0.810071	-4.38562	1.15657e-05	4.60513e-05
gene-fam173b	381.727	-3.5502	0.363079	-9.77805	1.39875e-22	3.45039e-21
gene-dpf2l-2	57.4322	-3.54727	0.799322	-4.43785	9.0864e-06	3.68536e-05
gene-si:ch211-193l2.7	83.4502	-3.5465	0.628632	-5.64162	1.68459e-08	1.03297e-07
gene-macc1	1141.89	-3.54212	0.376294	-9.4132	4.81279e-21	1.07185e-19
gene-si:dkeyp-2e4.7	203.485	-3.54146	0.702902	-5.03834	4.69575e-07	2.33804e-06
gene-dph3	191.263	-3.53948	0.556404	-6.36134	2.00004e-10	1.57074e-09
gene-spint1b	879.092	-3.53938	0.376547	-9.39959	5.47767e-21	1.2147e-19
gene-pth2r	23.2226	-3.5371	1.16826	-3.02768	0.00246441	0.0062213
gene-LOC566587	216.423	-3.53611	0.517203	-6.83699	8.08746e-12	7.46786e-11
gene-commd9-2	222.976	-3.53515	0.455667	-7.75818	8.61546e-15	1.07749e-13
gene-mmachc	217.938	-3.5351	0.422844	-8.36028	6.25678e-17	9.61762e-16
gene-trim71	2448.26	-3.53455	0.288915	-12.2339	2.0486e-34	1.07628e-32
gene-ptpn4a-2	213.656	-3.53227	0.732875	-4.81975	1.43741e-06	6.63407e-06
gene-rpp38	472.724	-3.52673	0.338345	-10.4235	1.93698e-25	5.87467e-24
gene-cachd1	299.553	-3.52357	0.390909	-9.01379	1.9906e-19	3.82482e-18
gene-phka1a	1214.54	-3.52316	0.326125	-10.8031	3.32775e-27	1.1356e-25
gene-si:ch73-166o21.1	325.347	-3.52179	0.489281	-7.1979	6.1146e-13	6.35275e-12
gene-znf618	523.231	-3.52011	0.454505	-7.74494	9.56281e-15	1.1908e-13
gene-ggps1	1718.06	-3.51926	0.459578	-7.65758	1.89471e-14	2.30075e-13
gene-ctu2	662.124	-3.51925	0.342994	-10.2604	1.06287e-24	3.04191e-23
gene-gdpd5a	287.56	-3.51647	0.469598	-7.48826	6.97941e-14	7.96711e-13
gene-cat	3722.46	-3.51644	0.304364	-11.5534	7.0935e-31	3.0827e-29
gene-accs	1134.87	-3.51364	0.280426	-12.5296	5.13926e-36	3.02527e-34
gene-eif4g2a	5251.34	-3.51359	0.228372	-15.3854	2.05058e-53	2.68243e-51
gene-slc25a38a	64.7535	-3.51258	1.11923	-3.1384	0.00169871	0.00445103
gene-pik3ip1	1321.04	-3.51	0.37787	-9.2889	1.55889e-20	3.31773e-19
gene-trmt2a-2	225.694	-3.5092	0.552448	-6.35209	2.12403e-10	1.66458e-09
gene-LOC556707	387.284	-3.5075	0.363737	-9.64295	5.26534e-22	1.24205e-20
gene-ssbp3a	170.25	-3.50727	0.464799	-7.54579	4.49564e-14	5.23333e-13
gene-her8a	25.6951	-3.50612	0.988555	-3.54671	0.000390076	0.00116829
gene-rab11fip5a	371.78	-3.50537	0.609958	-5.7469	9.08927e-09	5.78288e-08
gene-uck2a	220.76	-3.50181	0.788819	-4.4393	9.02501e-06	3.66447e-05
gene-ucp2	2177.28	-3.49936	0.234392	-14.9295	2.11816e-50	2.48246e-48
gene-LOC110437808	167.949	-3.49888	0.44317	-7.89512	2.90032e-15	3.80553e-14
gene-dnajc5ga	1532.21	-3.49887	0.281818	-12.4154	2.15718e-35	1.20157e-33
gene-tbc1d16	581.938	-3.49807	0.296547	-11.796	4.0929e-32	1.88966e-30
gene-trib3	541.764	-3.49764	0.346283	-10.1005	5.49471e-24	1.50602e-22
gene-pcsk6	577.142	-3.49537	0.401219	-8.71189	2.98862e-18	5.16745e-17
gene-haus6	3378.24	-3.49318	0.242024	-14.4332	3.1997e-47	3.32833e-45
gene-ttc27-2	482.733	-3.49299	0.472372	-7.39458	1.41859e-13	1.56419e-12
gene-LOC110437877	84.2426	-3.49204	0.701188	-4.98017	6.35284e-07	3.09877e-06
gene-pik3c2b	1889.83	-3.49076	0.35586	-9.80936	1.02618e-22	2.56555e-21
gene-rasgef1ba	53.3651	-3.48837	0.823592	-4.23556	2.27986e-05	8.63943e-05
gene-nck2a	291.89	-3.48703	0.394307	-8.84345	9.28099e-19	1.68179e-17
gene-fam65c	2500.56	-3.48637	0.361309	-9.64928	4.95013e-22	1.1709e-20
gene-nobox	63.6386	-3.48416	0.679272	-5.12925	2.90893e-07	1.49404e-06
gene-LOC100150229	214.836	-3.48308	0.427352	-8.15036	3.62846e-16	5.22405e-15
gene-zgc:171435	364.473	-3.48239	0.382274	-9.10966	8.26413e-20	1.644e-18
gene-si:cabz01069013.3	444.534	-3.48223	0.82387	-4.22668	2.37168e-05	8.96509e-05
gene-syt13	443.151	-3.48067	0.436546	-7.97319	1.54627e-15	2.08376e-14
gene-nhej1	481.18	-3.47771	0.330527	-10.5217	6.85991e-26	2.15107e-24
gene-si:dkey-10f21.4	73.8909	-3.47269	0.843214	-4.1184	3.8151e-05	0.000139058
gene-arl6ip5a	79.2299	-3.46931	0.792973	-4.37507	1.21395e-05	4.81507e-05
gene-inpp5f	1015.13	-3.46782	0.263688	-13.1512	1.67416e-39	1.16566e-37
gene-ddc	142.835	-3.467	0.993569	-3.48944	0.000484037	0.0014258
gene-mettl4	261.22	-3.46552	0.374693	-9.24895	2.26705e-20	4.73921e-19
gene-fn1a-2	331.896	-3.46507	0.775426	-4.46861	7.87312e-06	3.23583e-05
gene-npc2	2471.61	-3.46381	0.262564	-13.1923	9.72286e-40	6.93752e-38
gene-cx34.5	175.645	-3.46329	0.834533	-4.14997	3.32518e-05	0.000122355
gene-scamp2l	950.699	-3.46164	0.303118	-11.4201	3.31844e-30	1.39079e-28
gene-zgc:77880	483.947	-3.46082	0.424888	-8.14527	3.78443e-16	5.44558e-15
gene-ccnh	867.786	-3.46025	0.304695	-11.3564	6.89057e-30	2.82841e-28
gene-gpd1l	972	-3.4588	0.295963	-11.6866	1.49272e-31	6.74746e-30
gene-exd2	1994.75	-3.45784	0.298155	-11.5974	4.2455e-31	1.86694e-29
gene-LOC108190732	67.7197	-3.45619	0.906243	-3.81376	0.00013687	0.000450226
gene-picalma	118.693	-3.45494	0.508577	-6.79333	1.09573e-11	9.96853e-11
gene-ccdc69	1000.47	-3.45347	0.301806	-11.4427	2.55804e-30	1.08261e-28
gene-gsnb	476.016	-3.45272	0.532969	-6.47828	9.27739e-11	7.57307e-10
gene-ppp1r26	984.99	-3.45128	0.367778	-9.38415	6.34244e-21	1.3969e-19
gene-agps	447.968	-3.45019	0.361532	-9.54326	1.38409e-21	3.18377e-20
gene-si:ch211-202f5.3	120.178	-3.44975	1.01803	-3.38866	0.000702359	0.00200284
gene-elovl1a	670.986	-3.44897	0.335274	-10.287	8.06427e-25	2.32857e-23
gene-hnrnpa1b	2435.23	-3.44812	0.381384	-9.04107	1.5515e-19	3.01692e-18
gene-si:dkey-238d18.4	141.313	-3.44709	0.49812	-6.92021	4.5098e-12	4.28969e-11
gene-ccdc149b	40.2498	-3.44655	0.831107	-4.14694	3.36943e-05	0.000123772
gene-mibp	1462.53	-3.44522	0.439047	-7.84703	4.25991e-15	5.49755e-14
gene-calr3a	1799.33	-3.44501	0.257175	-13.3956	6.41963e-41	4.91937e-39
gene-rhbdl2-2	72.8914	-3.44328	0.795469	-4.32862	1.50045e-05	5.87235e-05
gene-emc1-2	520.055	-3.44269	0.448116	-7.68259	1.55902e-14	1.90742e-13
gene-si:dkey-3k20.4	174.523	-3.43893	0.551088	-6.24026	4.36853e-10	3.2921e-09
gene-LOC100332443	692.083	-3.43855	0.321202	-10.7053	9.61665e-27	3.18111e-25
gene-si:ch211-212o1.2	61.7264	-3.43453	0.67119	-5.11707	3.10323e-07	1.58471e-06
gene-eno3	4954.21	-3.43392	0.355325	-9.66418	4.28038e-22	1.01899e-20
gene-atp2a2a	1199.56	-3.43191	0.288848	-11.8814	1.47901e-32	6.91478e-31
gene-rps6ka1	483.667	-3.43096	0.307923	-11.1423	7.8101e-29	2.97923e-27
gene-exosc4	639.297	-3.42953	0.335309	-10.228	1.48581e-24	4.2059e-23
gene-gig2o	245.004	-3.42802	0.393339	-8.71519	2.90279e-18	5.0291e-17
gene-dtl	2035.73	-3.42713	0.275176	-12.4543	1.32488e-35	7.53679e-34
gene-plekhg5b	801.142	-3.4269	0.289036	-11.8563	1.99586e-32	9.29762e-31
gene-fam3a	46.1362	-3.42635	0.945612	-3.62342	0.000290736	0.000892645
gene-zgc:158257	305.805	-3.4245	0.410294	-8.34645	7.0348e-17	1.07752e-15
gene-ptx4-2	57.2833	-3.4234	0.816014	-4.19527	2.72553e-05	0.000101764
gene-xbp1	2379.18	-3.42286	0.29963	-11.4236	3.18644e-30	1.3398e-28
gene-or111-11	46.365	-3.421	0.766473	-4.4633	8.07054e-06	3.30804e-05
gene-sytl4	602.608	-3.41303	0.296973	-11.4927	1.43535e-30	6.18587e-29
gene-thap11	517.967	-3.41113	0.321055	-10.6248	2.28554e-26	7.38125e-25
gene-abcf2a	4697.95	-3.41109	0.276453	-12.3388	5.59908e-35	3.04667e-33
gene-si:dkey-226l10.6	199.041	-3.411	0.684627	-4.98228	6.28397e-07	3.06865e-06
gene-gpr157-2	85.4036	-3.40816	0.886996	-3.84236	0.000121855	0.000404897
gene-si:dkey-206p8.1	105.708	-3.40501	0.591367	-5.75786	8.51883e-09	5.43865e-08
gene-hps4	544.59	-3.40433	0.36537	-9.31748	1.19136e-20	2.57575e-19
gene-hspa5	9229.14	-3.40294	0.308937	-11.015	3.23511e-28	1.17686e-26
gene-rrp9	423.331	-3.40165	0.450757	-7.54653	4.47002e-14	5.20584e-13
gene-mfsd6l	589.6	-3.40119	0.403894	-8.42099	3.73325e-17	5.8674e-16
gene-lsamp	64.2351	-3.40106	0.781066	-4.35438	1.33443e-05	5.26314e-05
gene-rbfox2	1248.35	-3.39933	0.387956	-8.76216	1.91539e-18	3.37717e-17
gene-arfgap3	626.715	-3.39711	0.498005	-6.82143	9.01385e-12	8.28488e-11
gene-LOC101882086	146.757	-3.39641	0.495252	-6.85796	6.98524e-12	6.50107e-11
gene-zgc:171566	907.642	-3.39577	0.326125	-10.4125	2.17492e-25	6.57324e-24
gene-fam171a1	2222.63	-3.39562	0.248233	-13.6791	1.35292e-42	1.12314e-40
gene-tdp2b	555.68	-3.3931	0.52846	-6.42074	1.35615e-10	1.08345e-09
gene-LOC100001832	253.052	-3.38994	0.49594	-6.83538	8.17907e-12	7.54706e-11
gene-alg3	755.663	-3.38979	0.402229	-8.42752	3.53078e-17	5.5627e-16
gene-si:ch73-382f3.1	688.564	-3.38858	0.352421	-9.61516	6.90041e-22	1.61891e-20
gene-mllt3	363.299	-3.38857	0.338784	-10.0022	1.49113e-23	3.97752e-22
gene-zcchc6	1748.45	-3.3854	0.246513	-13.7332	6.42657e-43	5.3695e-41
gene-rbm38	449.068	-3.3839	0.330481	-10.2393	1.32156e-24	3.7615e-23
gene-thoc3	1460.7	-3.38291	0.317668	-10.6492	1.75873e-26	5.73715e-25
gene-arid3b	1502.8	-3.38162	0.405227	-8.345	7.12145e-17	1.0895e-15
gene-si:ch211-147a11.3	696.423	-3.3794	0.488862	-6.9128	4.75192e-12	4.5084e-11
gene-pja2	187.027	-3.37895	0.795209	-4.24913	2.146e-05	8.17646e-05
gene-zgc:66443	715.037	-3.37843	0.275119	-12.2799	1.16174e-34	6.20419e-33
gene-vsig10	21.0012	-3.37831	1.07253	-3.14984	0.00163358	0.00429425
gene-trac	85.8696	-3.37801	0.587365	-5.75112	8.86523e-09	5.64867e-08
gene-zgc:153929	199.752	-3.37782	0.415297	-8.13349	4.171e-16	5.97859e-15
gene-unc13bb	1120.81	-3.37696	0.262473	-12.8659	7.0014e-38	4.49983e-36
gene-jmjd6	2041.26	-3.37445	0.304568	-11.0795	1.57804e-28	5.90649e-27
gene-nrbp2a	965.66	-3.37362	0.291443	-11.5756	5.48004e-31	2.39761e-29
gene-si:dkey-11f12.2	1321.34	-3.37217	0.263262	-12.8092	1.45639e-37	9.2005e-36
gene-tle3b	1781.68	-3.37078	0.249758	-13.4962	1.64759e-41	1.32118e-39
gene-tcirg1b	1734.27	-3.37061	0.320757	-10.5083	7.90937e-26	2.46523e-24
gene-znfl2a	145.686	-3.37033	1.08612	-3.1031	0.00191503	0.0049621
gene-phgdh	785.516	-3.37016	0.360163	-9.3573	8.17964e-21	1.78786e-19
gene-btg3	466.564	-3.36923	0.352213	-9.56589	1.11242e-21	2.58179e-20
gene-prps1b-2	350.301	-3.36653	0.34109	-9.86992	5.62109e-23	1.42737e-21
gene-tnfaip1-3	262.732	-3.36437	0.387913	-8.67301	4.20847e-18	7.19971e-17
gene-fnbp1l	664.154	-3.36286	0.465775	-7.21992	5.20178e-13	5.43052e-12
gene-grin2ab-2	465.417	-3.36206	0.390819	-8.6026	7.79304e-18	1.3073e-16
gene-eml2	1671.09	-3.35879	0.320949	-10.4652	1.24825e-25	3.82614e-24
gene-lsm11	388.151	-3.35846	0.336526	-9.97978	1.86881e-23	4.93919e-22
gene-mrpl48	213.95	-3.35738	0.410472	-8.1793	2.85497e-16	4.16132e-15
gene-spint2-2	329.789	-3.35628	0.365906	-9.17251	4.62141e-20	9.37347e-19
gene-pld1a	660.495	-3.35587	0.495083	-6.77838	1.21527e-11	1.09599e-10
gene-dhx30	1039.79	-3.35352	0.373073	-8.98891	2.49705e-19	4.77315e-18
gene-rnf128a	1465.21	-3.35247	0.251973	-13.3049	2.16794e-40	1.60893e-38
gene-slc5a5	123.923	-3.35244	0.600287	-5.58473	2.34059e-08	1.40952e-07
gene-tcf3b	23.0746	-3.35095	1.07548	-3.11575	0.00183475	0.00477222
gene-slc38a11	213.458	-3.34762	0.55146	-6.07046	1.27543e-09	9.11522e-09
gene-hic1l	984.811	-3.34672	0.309265	-10.8215	2.72236e-27	9.3517e-26
gene-wdr75	1651.05	-3.34334	0.275126	-12.152	5.59656e-34	2.84228e-32
gene-lztr1-2	916.382	-3.34286	0.481777	-6.93861	3.95979e-12	3.79018e-11
gene-bmp1b	427.746	-3.34217	0.465148	-7.18517	6.71241e-13	6.93491e-12
gene-pygb-2	804.592	-3.34211	0.368735	-9.06371	1.26085e-19	2.4703e-18
gene-xpo4-2	382.285	-3.33663	0.425338	-7.84465	4.34159e-15	5.58904e-14
gene-rps6ka3a	104.073	-3.33287	0.522514	-6.37853	1.7879e-10	1.40969e-09
gene-tsen2	307.504	-3.3302	0.372183	-8.94774	3.62842e-19	6.83488e-18
gene-arf5-2	545.7	-3.32961	0.587706	-5.66544	1.46648e-08	9.07823e-08
gene-lhx8a	1168.28	-3.32905	0.40836	-8.15226	3.57196e-16	5.14557e-15
gene-zc3hc1	1069.98	-3.32817	0.268923	-12.3759	3.52936e-35	1.94085e-33
gene-cax1	2206	-3.32692	0.266876	-12.4661	1.14245e-35	6.51777e-34
gene-supv3l1	204.207	-3.32576	0.668673	-4.97367	6.56959e-07	3.19607e-06
gene-LOC100150651	647.36	-3.32573	0.286786	-11.5965	4.29028e-31	1.88343e-29
gene-si:ch211-226l4.6	842.037	-3.32363	0.372436	-8.92403	4.49613e-19	8.39008e-18
gene-gpatch4	360.645	-3.3227	0.367187	-9.04908	1.44181e-19	2.80785e-18
gene-mgat1a	1142.39	-3.32264	0.256339	-12.9619	2.01198e-38	1.33621e-36
gene-mrpl1-2	120.516	-3.32245	0.669396	-4.96336	6.92857e-07	3.35621e-06
gene-aprt	481.182	-3.32097	0.36026	-9.21826	3.01966e-20	6.24199e-19
gene-serpine1	273.025	-3.32088	0.541312	-6.13488	8.52241e-10	6.21625e-09
gene-heatr5a	269.953	-3.32082	0.451596	-7.35353	1.93041e-13	2.09994e-12
gene-tbp	1737.41	-3.31602	0.309376	-10.7184	8.34102e-27	2.77331e-25
gene-si:dkey-253d23.2	714.653	-3.31419	0.326128	-10.1622	2.92315e-24	8.12367e-23
gene-katna1	489.942	-3.31356	0.340329	-9.73633	2.11032e-22	5.13234e-21
gene-rpp25l	635.894	-3.31353	0.339262	-9.76688	1.56185e-22	3.82359e-21
gene-gb:eh507706	755.589	-3.31154	0.275335	-12.0273	2.55313e-33	1.24771e-31
gene-trmt6	587.852	-3.31052	0.3171	-10.44	1.62842e-25	4.95044e-24
gene-bmi1b	896.061	-3.30728	0.298135	-11.0932	1.35305e-28	5.09382e-27
gene-fbxw7-3	294.598	-3.30545	0.523767	-6.31093	2.7737e-10	2.13942e-09
gene-hic2	511.925	-3.30457	0.332614	-9.93514	2.92764e-23	7.58288e-22
gene-fam60al	1629.73	-3.30415	0.238051	-13.88	8.37285e-44	7.45241e-42
gene-tmem223	203.954	-3.3039	0.421218	-7.84368	4.37514e-15	5.62664e-14
gene-zgc:173726	215.313	-3.30254	0.683971	-4.82849	1.37575e-06	6.37218e-06
gene-mettl21a	217.051	-3.3023	0.436626	-7.56323	3.9317e-14	4.62508e-13
gene-akr7a3	307.698	-3.29902	0.404091	-8.16404	3.24001e-16	4.69874e-15
gene-cnn3b	1441.95	-3.29901	0.320172	-10.3039	6.76736e-25	1.97611e-23
gene-LOC100331268	42.4379	-3.2965	0.775348	-4.25164	2.12214e-05	8.09268e-05
gene-arrdc1a	629.278	-3.29623	0.296998	-11.0985	1.27599e-28	4.81772e-27
gene-wdr4	561.611	-3.29575	0.304435	-10.8258	2.59812e-27	8.9725e-26
gene-unm_hu7910	616.118	-3.29493	0.427627	-7.70516	1.30683e-14	1.60722e-13
gene-wu:fe05a04	1302.66	-3.29435	0.336759	-9.7825	1.33856e-22	3.31137e-21
gene-aff1	374.194	-3.29348	0.409265	-8.04732	8.46243e-16	1.17337e-14
gene-tln2a	1206.59	-3.29234	0.267145	-12.3242	6.71406e-35	3.6305e-33
gene-abhd17c	329.255	-3.29159	0.660349	-4.98463	6.20812e-07	3.03619e-06
gene-sh3gl1a	459.377	-3.29025	0.34926	-9.42063	4.48407e-21	1.00122e-19
gene-limd2	451.249	-3.28923	0.343892	-9.56471	1.12521e-21	2.60914e-20
gene-ccnb1	10907.6	-3.28919	0.336597	-9.77188	1.48664e-22	3.64636e-21
gene-atp5g1	1847.2	-3.28876	0.309542	-10.6246	2.2895e-26	7.38485e-25
gene-mad2l1bp	455.308	-3.28636	0.440594	-7.45894	8.72226e-14	9.83523e-13
gene-LOC101885302	334.121	-3.28495	0.487361	-6.74028	1.58084e-11	1.40851e-10
gene-lmf2a	1116.08	-3.28331	0.331608	-9.90116	4.11478e-23	1.05731e-21
gene-itpr3	40.048	-3.28311	0.884063	-3.71366	0.000204282	0.000648897
gene-cdcp1a	622.771	-3.28281	0.452748	-7.25084	4.14181e-13	4.38224e-12
gene-rassf9	248.867	-3.2807	0.453585	-7.23281	4.73115e-13	4.9753e-12
gene-dhx32a	1021.19	-3.27956	0.30124	-10.8868	1.3317e-27	4.70566e-26
gene-pdik1l	834.325	-3.27903	0.282315	-11.6148	3.46614e-31	1.53464e-29
gene-unc5da	203.881	-3.27837	0.685257	-4.78414	1.71717e-06	7.83725e-06
gene-ubxn2a	755.918	-3.27784	0.298011	-10.999	3.86213e-28	1.39906e-26
gene-si:ch211-253b8.2	693.314	-3.27699	0.313762	-10.4442	1.55777e-25	4.74121e-24
gene-sepsecs	311.38	-3.27699	0.50788	-6.45229	1.10174e-10	8.89809e-10
gene-zbtb3	602.617	-3.27666	0.306429	-10.693	1.09741e-26	3.6209e-25
gene-si:ch73-27e22.7	74.6034	-3.27514	0.742073	-4.4135	1.01713e-05	4.08633e-05
gene-slc48a1b	508.145	-3.27449	0.331481	-9.87837	5.1669e-23	1.3185e-21
gene-glipr2-2	85.9434	-3.27342	0.581749	-5.62686	1.83524e-08	1.11951e-07
gene-zgc:171727	995.405	-3.27337	0.279473	-11.7127	1.09759e-31	4.99626e-30
gene-zfand2a	777.841	-3.27294	0.375869	-8.70766	3.10209e-18	5.36005e-17
gene-zc3h18-2	134.997	-3.27153	0.536614	-6.09661	1.08344e-09	7.80587e-09
gene-pros1	878.377	-3.26821	0.477959	-6.83784	8.0394e-12	7.42877e-11
gene-kxd1	220.313	-3.26777	0.389888	-8.38129	5.23497e-17	8.12409e-16
gene-mblac2	66.9158	-3.26672	0.77471	-4.2167	2.47905e-05	9.33826e-05
gene-ing5b	636.895	-3.26623	0.299671	-10.8994	1.16017e-27	4.12771e-26
gene-slc7a4	387.52	-3.2642	0.424349	-7.69224	1.44581e-14	1.77226e-13
gene-pdxdc1	1160.09	-3.26409	0.375353	-8.69606	3.43592e-18	5.90928e-17
gene-LOC100331115	206.942	-3.26271	0.409467	-7.96819	1.61017e-15	2.16537e-14
gene-mob1a-2	179.121	-3.26171	0.500843	-6.51245	7.39343e-11	6.10837e-10
gene-plpp2b	197.063	-3.2608	0.572589	-5.69484	1.2349e-08	7.711e-08
gene-glula	2793.19	-3.25893	0.335857	-9.70332	2.91851e-22	7.04494e-21
gene-hs3st1l2	71.1949	-3.25825	0.675125	-4.82614	1.39203e-06	6.44071e-06
gene-camk2g1	1565.99	-3.25818	0.352968	-9.23083	2.68536e-20	5.56428e-19
gene-znf989-2	149.987	-3.25775	0.521258	-6.24979	4.11015e-10	3.10914e-09
gene-LOC101882228	174.758	-3.25613	0.486973	-6.68647	2.28612e-11	1.99773e-10
gene-fbxo34	2377.3	-3.25613	0.30064	-10.8306	2.46446e-27	8.55656e-26
gene-lig4	552.587	-3.25528	0.315819	-10.3074	6.52249e-25	1.90676e-23
gene-nufip1	469.684	-3.25437	0.392529	-8.29076	1.12524e-16	1.69054e-15
gene-ppm1db-3	161.341	-3.25261	0.575124	-5.6555	1.5539e-08	9.5805e-08
gene-rnf180	195.725	-3.25154	0.435583	-7.46478	8.34362e-14	9.43114e-13
gene-si:dkey-182g1.2	534.821	-3.24796	0.476062	-6.82255	8.94383e-12	8.22636e-11
gene-zgc:162816	411.078	-3.24639	0.437371	-7.42251	1.14923e-13	1.28137e-12
gene-arhgef28-2	382.798	-3.24577	0.41458	-7.82906	4.91529e-15	6.30564e-14
gene-srm	922.524	-3.24456	0.388004	-8.36218	6.157e-17	9.47549e-16
gene-zgc:63972	94.9157	-3.24409	0.582977	-5.5647	2.62599e-08	1.56936e-07
gene-tmem184a	738.387	-3.24368	0.470545	-6.89346	5.44533e-12	5.13058e-11
gene-si:ch211-74f19.2	254.39	-3.24355	0.458658	-7.07183	1.529e-12	1.53084e-11
gene-nmnat1	134.575	-3.24342	0.673238	-4.81764	1.45267e-06	6.69614e-06
gene-nsdhl	431.333	-3.23753	0.346576	-9.34146	9.50136e-21	2.06455e-19
gene-LOC110438534	46.3508	-3.23728	0.749109	-4.32151	1.54964e-05	6.05205e-05
gene-spcs3	901.961	-3.23626	0.318712	-10.1542	3.17464e-24	8.8131e-23
gene-ctsa	2163.13	-3.23615	0.244288	-13.2473	4.67788e-40	3.37498e-38
gene-zgc:56628	121.883	-3.23571	0.537105	-6.02436	1.69785e-09	1.19047e-08
gene-clcnk	164.05	-3.2352	0.608046	-5.32065	1.03397e-07	5.67991e-07
gene-rab11al	428.88	-3.23397	0.37778	-8.56048	1.12402e-17	1.86027e-16
gene-fam212ab	1625.7	-3.23382	0.373364	-8.6613	4.66406e-18	7.95809e-17
gene-acrc	1124.52	-3.23355	0.328954	-9.82978	8.37993e-23	2.10932e-21
gene-kcnk5b	824.32	-3.23212	0.392792	-8.22858	1.89448e-16	2.80714e-15
gene-atic	2714.29	-3.23019	0.377579	-8.55499	1.17877e-17	1.94716e-16
gene-wu:fa19b12	469.334	-3.22968	0.306259	-10.5456	5.32411e-26	1.67965e-24
gene-asap3	176.505	-3.22958	0.533661	-6.05174	1.43291e-09	1.01431e-08
gene-zgc:100829	392.788	-3.22697	0.470664	-6.8562	7.07168e-12	6.57207e-11
gene-zgc:162183-2	154.329	-3.22443	0.450804	-7.15263	8.51313e-13	8.7241e-12
gene-prdx4	724.689	-3.22382	0.358085	-9.00295	2.19742e-19	4.20972e-18
gene-adat3	267.968	-3.22374	0.405741	-7.94531	1.93712e-15	2.58492e-14
gene-senp3b	924.518	-3.22335	0.281522	-11.4497	2.35908e-30	1.00332e-28
gene-aars	304.283	-3.22237	0.42013	-7.66995	1.72067e-14	2.09727e-13
gene-spata2l	511.316	-3.22231	0.461663	-6.97978	2.95635e-12	2.88191e-11
gene-stx3a	464.998	-3.22224	0.409424	-7.87018	3.54135e-15	4.60695e-14
gene-alg2	538.19	-3.22195	0.376568	-8.5561	1.16748e-17	1.93096e-16
gene-zgc:162928	121.332	-3.22021	0.684225	-4.70636	2.52185e-06	1.12308e-05
gene-ppp4r1	1406.62	-3.21952	0.323009	-9.9673	2.11915e-23	5.54987e-22
gene-pdia5	471.357	-3.21916	0.380518	-8.45992	2.67557e-17	4.26461e-16
gene-tjp3	949.91	-3.21912	0.272506	-11.813	3.34288e-32	1.54614e-30
gene-b4galt7	637.08	-3.21824	0.339245	-9.48648	2.38959e-21	5.43872e-20
gene-LOC103911143	29.8402	-3.21651	1.0734	-2.99655	0.00273051	0.00680945
gene-pdgfc	83.8322	-3.21561	0.772673	-4.16167	3.15934e-05	0.000116767
gene-nr4a2b	47.0413	-3.21456	1.07252	-2.99722	0.00272454	0.00679608
gene-tpp1	1730.63	-3.21416	0.376241	-8.54281	1.30995e-17	2.15696e-16
gene-rwdd2b	412.613	-3.21351	0.394682	-8.14201	3.88762e-16	5.58477e-15
gene-timm8b	194.459	-3.21222	0.425564	-7.54815	4.41468e-14	5.14602e-13
gene-zgc:162948	430.479	-3.21109	0.409287	-7.84556	4.31018e-15	5.55689e-14
gene-apoda.2	601.582	-3.20881	0.584323	-5.4915	3.98529e-08	2.31701e-07
gene-palld	1479.92	-3.20792	0.378792	-8.46881	2.47914e-17	3.96371e-16
gene-fam110a	789.271	-3.20742	0.411694	-7.79078	6.65944e-15	8.41396e-14
gene-sox9b	63.9765	-3.2064	0.821815	-3.90161	9.55536e-05	0.000323478
gene-pth1a	34.5217	-3.20578	0.879774	-3.64386	0.000268575	0.000831604
gene-zgc:153675	348.971	-3.20373	0.442994	-7.232	4.7595e-13	5.00104e-12
gene-zmynd19	1077.49	-3.20311	0.301259	-10.6324	2.10583e-26	6.83499e-25
gene-trmt2b	259.639	-3.20256	0.370104	-8.65314	5.01016e-18	8.52056e-17
gene-ptgfrn	1233.98	-3.20097	0.27453	-11.6598	2.04407e-31	9.15975e-30
gene-col28a2b	342.559	-3.20022	0.642561	-4.98042	6.34451e-07	3.0953e-06
gene-cckar	71.4282	-3.20005	0.640752	-4.99421	5.90771e-07	2.89747e-06
gene-ints3	2210.84	-3.19839	0.249672	-12.8103	1.4351e-37	9.08817e-36
gene-ube2g1b	1349.04	-3.19717	0.251191	-12.728	4.1321e-37	2.54217e-35
gene-abi1b	69.573	-3.19702	0.659054	-4.85092	1.22891e-06	5.73515e-06
gene-lman1	1319.83	-3.19682	0.33885	-9.43431	3.93579e-21	8.82606e-20
gene-pard6gb	481.492	-3.19674	0.331802	-9.63449	5.71729e-22	1.34499e-20
gene-slc37a1	913.151	-3.19639	0.26168	-12.2149	2.58816e-34	1.34881e-32
gene-mpzl3	257.976	-3.19533	0.505996	-6.31494	2.7026e-10	2.08955e-09
gene-jtb	1171.56	-3.19487	0.256829	-12.4397	1.59153e-35	8.96136e-34
gene-slc25a20	465.41	-3.1946	0.330752	-9.65859	4.52021e-22	1.0751e-20
gene-pomgnt1	209.497	-3.19372	0.395908	-8.06682	7.21508e-16	1.00526e-14
gene-tmem241	115.847	-3.19356	0.700374	-4.55979	5.12042e-06	2.17025e-05
gene-si:dkey-260c8.8	783.349	-3.19158	0.363058	-8.79084	1.48439e-18	2.64242e-17
gene-fastkd5	754.336	-3.19093	0.315203	-10.1234	4.35001e-24	1.19989e-22
gene-fkbp6-2	45.4519	-3.19089	0.756205	-4.21962	2.44717e-05	9.22756e-05
gene-rbm24a	224.45	-3.18839	0.508076	-6.27542	3.48701e-10	2.66658e-09
gene-mtmr4	1805.54	-3.18764	0.266459	-11.963	5.55398e-33	2.6689e-31
gene-dscc1	547.36	-3.1855	0.374983	-8.49506	1.97825e-17	3.18451e-16
gene-ccdc9	338.359	-3.18392	0.360935	-8.82131	1.13131e-18	2.03064e-17
gene-gtf2a2	205.02	-3.18316	0.710891	-4.47771	7.54473e-06	3.10628e-05
gene-nr2f1b	123.566	-3.18293	0.919563	-3.46135	0.000537471	0.00156716
gene-ttc27-3	330.791	-3.18006	0.545731	-5.82716	5.63778e-09	3.68934e-08
gene-oraov1	277.591	-3.17876	0.393171	-8.08494	6.21965e-16	8.73145e-15
gene-gmnn	883.585	-3.17854	0.553656	-5.741	9.41184e-09	5.97637e-08
gene-krcp	3774.08	-3.1785	0.273232	-11.6329	2.8028e-31	1.2452e-29
gene-baiap2a	541.627	-3.17702	0.622504	-5.10362	3.33224e-07	1.69298e-06
gene-pxna-2	237.255	-3.17686	0.72982	-4.35294	1.34321e-05	5.29535e-05
gene-bace2	511.423	-3.17573	0.483711	-6.56535	5.19119e-11	4.35842e-10
gene-gdap2	561.523	-3.17331	0.346268	-9.16431	4.98633e-20	1.0082e-18
gene-sept15-2	374.208	-3.17069	0.632224	-5.01513	5.2997e-07	2.61861e-06
gene-spryd4	129.033	-3.17063	0.785969	-4.03404	5.48268e-05	0.000193884
gene-usp30	397.408	-3.1696	0.534527	-5.92973	3.03436e-09	2.06118e-08
gene-zgc:113162	463.351	-3.16945	0.374331	-8.46698	2.51847e-17	4.01916e-16
gene-nepro-3	264.153	-3.169	0.634742	-4.99257	5.95797e-07	2.91936e-06
gene-g3bp1	4112.96	-3.16822	0.287104	-11.0351	2.58812e-28	9.49502e-27
gene-slc12a9	592.565	-3.1677	0.342544	-9.24755	2.29697e-20	4.7979e-19
gene-pon3.1	176.06	-3.16673	0.502563	-6.30116	2.95422e-10	2.27257e-09
gene-calub	948.848	-3.16554	0.25682	-12.3259	6.56855e-35	3.55925e-33
gene-uap1l1	274.6	-3.16501	0.583684	-5.42247	5.87809e-08	3.34612e-07
gene-zcchc10	563.231	-3.16494	0.29135	-10.863	1.72922e-27	6.05252e-26
gene-ets1	196.716	-3.16229	0.566335	-5.58378	2.35344e-08	1.41595e-07
gene-zgc:114200	727.102	-3.16224	0.271086	-11.6651	1.92195e-31	8.62745e-30
gene-tpm3	888.272	-3.16087	0.566351	-5.58111	2.38982e-08	1.43717e-07
gene-arsb	241.162	-3.16042	0.411949	-7.67188	1.69492e-14	2.06686e-13
gene-plekhg5a	333.942	-3.15923	0.545748	-5.78881	7.08884e-09	4.57191e-08
gene-slc46a1	264.649	-3.15528	0.438086	-7.20241	5.91556e-13	6.15089e-12
gene-LOC100535588	125.312	-3.15503	0.500695	-6.30129	2.95173e-10	2.27133e-09
gene-aplnr2	148.658	-3.15349	0.547933	-5.75524	8.65198e-09	5.51686e-08
gene-eif4enif1	4015.75	-3.15282	0.298474	-10.5631	4.4167e-26	1.40192e-24
gene-ntmt1	251.514	-3.1508	0.463497	-6.79788	1.06167e-11	9.68249e-11
gene-gne	700.845	-3.14973	0.298041	-10.5681	4.18725e-26	1.33527e-24
gene-march7	2635.74	-3.14835	0.226787	-13.8824	8.09981e-44	7.23425e-42
gene-scpep1	1572.61	-3.14744	0.392391	-8.0212	1.0472e-15	1.43207e-14
gene-spryd4-2	388.508	-3.14572	0.490328	-6.41555	1.40314e-10	1.11893e-09
gene-zmym4	2257.36	-3.14518	0.247783	-12.6933	6.44294e-37	3.93582e-35
gene-znf281b	2095.28	-3.14439	0.246157	-12.7739	2.29411e-37	1.43526e-35
gene-ercc4	989.072	-3.14302	0.277053	-11.3445	7.90169e-30	3.22302e-28
gene-wdr73	230.515	-3.14176	0.446105	-7.04264	1.88629e-12	1.86976e-11
gene-ssb	1247.88	-3.14125	0.261948	-11.9919	3.91982e-33	1.89771e-31
gene-LOC100332608	120.902	-3.13962	0.610705	-5.14097	2.7332e-07	1.40965e-06
gene-rgmb	170.722	-3.13957	0.463764	-6.76975	1.29006e-11	1.16142e-10
gene-csrnp1b	998.259	-3.13818	0.41029	-7.64869	2.03037e-14	2.46086e-13
gene-ext1a	544.41	-3.13737	0.347581	-9.02631	1.77555e-19	3.42432e-18
gene-umps	1734.62	-3.13675	0.385172	-8.14378	3.8312e-16	5.50676e-15
gene-fam210b	212.42	-3.13641	0.499273	-6.28195	3.34344e-10	2.55981e-09
gene-usp10	6490.56	-3.135	0.266162	-11.7785	5.037e-32	2.32141e-30
gene-lonrf1l	1053.26	-3.133	0.260702	-12.0175	2.87379e-33	1.39914e-31
gene-chst2a	673.455	-3.13258	0.289295	-10.8283	2.52735e-27	8.73977e-26
gene-xrn2	2666.86	-3.13166	0.264681	-11.8318	2.6727e-32	1.23838e-30
gene-alkbh1	182.744	-3.13086	0.43112	-7.26215	3.80992e-13	4.04429e-12
gene-si:dkey-167k11.5	292.035	-3.13019	0.627795	-4.98601	6.16376e-07	3.0162e-06
gene-LOC100534722	933.633	-3.12994	0.327097	-9.56885	1.08098e-21	2.51108e-20
gene-ptmab	547.848	-3.12993	0.56704	-5.51977	3.3945e-08	1.99412e-07
gene-trmt2a	173.434	-3.12899	0.811243	-3.85703	0.000114775	0.000383337
gene-chac1	2358.37	-3.12755	0.406509	-7.6937	1.4294e-14	1.75381e-13
gene-LOC100004180	152.804	-3.12695	0.577862	-5.41124	6.25911e-08	3.54742e-07
gene-ctbp2a	461.981	-3.12372	0.476258	-6.55889	5.42115e-11	4.53971e-10
gene-asb5a	25.4586	-3.12321	0.938463	-3.32801	0.000874685	0.00244498
gene-thap1	214.198	-3.12316	0.520294	-6.00269	1.94078e-09	1.34948e-08
gene-chd8	763.433	-3.12297	0.570069	-5.47823	4.29601e-08	2.48539e-07
gene-atp2a2b	3353.79	-3.12173	0.271717	-11.4889	1.49986e-30	6.45312e-29
gene-slc35f2	752.054	-3.12122	0.350885	-8.89526	5.82807e-19	1.07363e-17
gene-prdx6	191.938	-3.12067	0.579607	-5.3841	7.28067e-08	4.08586e-07
gene-cers2a	606.084	-3.1189	0.397106	-7.85409	4.02687e-15	5.21239e-14
gene-hook2	960.81	-3.11686	0.274316	-11.3623	6.44104e-30	2.66501e-28
gene-zc3h15	1026.99	-3.11614	0.280377	-11.1141	1.07126e-28	4.06249e-27
gene-fut11	425.486	-3.11599	0.323182	-9.6416	5.33509e-22	1.25736e-20
gene-snrpa	1203.62	-3.11573	0.278255	-11.1974	4.19915e-29	1.62574e-27
gene-pinx1	214.481	-3.11509	0.399352	-7.80036	6.17289e-15	7.83362e-14
gene-si:ch211-239e6.4	531.018	-3.11452	0.3738	-8.33205	7.94531e-17	1.21196e-15
gene-ptcd2	80.3385	-3.11258	0.584849	-5.32203	1.02617e-07	5.6383e-07
gene-svilb	811.47	-3.11255	0.509695	-6.1067	1.01714e-09	7.34662e-09
gene-si:dkey-103i16.6-2	558.716	-3.11216	0.409406	-7.60165	2.92367e-14	3.48326e-13
gene-pex11b	412.132	-3.11127	0.370841	-8.38977	4.87102e-17	7.58198e-16
gene-actn4	2486.06	-3.11052	0.602964	-5.15871	2.48651e-07	1.28935e-06
gene-rras	1357.81	-3.10847	0.242996	-12.7923	1.81067e-37	1.14107e-35
gene-lrrtm4	70.2332	-3.10804	0.604202	-5.14405	2.68882e-07	1.38842e-06
gene-rhpn2	744.779	-3.10777	0.276452	-11.2416	2.54676e-29	1.00401e-27
gene-thop1	4295.43	-3.10737	0.333118	-9.32815	1.07737e-20	2.33515e-19
gene-ugt5f1	444.706	-3.10732	0.309895	-10.027	1.15968e-23	3.11587e-22
gene-tpte	599.627	-3.10672	0.332449	-9.34495	9.19358e-21	2.00103e-19
gene-mrps34	381.844	-3.10651	0.720557	-4.31126	1.6233e-05	6.31495e-05
gene-tmem132e	627.599	-3.10638	0.369923	-8.39737	4.56586e-17	7.12841e-16
gene-ssfa2	857.358	-3.10501	0.361099	-8.59876	8.05789e-18	1.34998e-16
gene-mia3	2691.94	-3.10491	0.292182	-10.6266	2.24086e-26	7.24602e-25
gene-usp37	2643.16	-3.10478	0.273976	-11.3323	9.08213e-30	3.68709e-28
gene-tor2a	173.709	-3.10386	0.601841	-5.15727	2.50578e-07	1.29908e-06
gene-rcan1b	54.0539	-3.10266	0.822531	-3.77209	0.000161887	0.000525048
gene-si:ch73-109d9.2	829.312	-3.10251	0.27307	-11.3616	6.49614e-30	2.68352e-28
gene-arfip1	421.831	-3.10192	0.464885	-6.67245	2.51571e-11	2.18436e-10
gene-cyp2r1	208.252	-3.10151	0.389918	-7.95428	1.80172e-15	2.4117e-14
gene-lrrc3b	39.9893	-3.10094	0.766755	-4.04423	5.24951e-05	0.000186155
gene-nck2b	196.804	-3.10038	0.743001	-4.17278	3.00906e-05	0.000111626
gene-LOC110440161	100.17	-3.09989	0.520579	-5.9547	2.60548e-09	1.78436e-08
gene-trim35-28	405.147	-3.09611	0.405939	-7.62701	2.40252e-14	2.88893e-13
gene-slc9a3r1a-2	129.88	-3.0952	0.50092	-6.17903	6.44974e-10	4.76075e-09
gene-prmt9	589.817	-3.09434	0.320563	-9.65282	4.78241e-22	1.13329e-20
gene-atf7b	302.148	-3.09421	0.896036	-3.45322	0.000553936	0.0016119
gene-siah2l	213.497	-3.09348	0.417532	-7.40896	1.27293e-13	1.4126e-12
gene-ska2	971.414	-3.09302	0.280251	-11.0366	2.5447e-28	9.34899e-27
gene-ubash3ba	729.483	-3.09202	0.328447	-9.41407	4.77304e-21	1.06391e-19
gene-tbl2	834.127	-3.09176	0.317604	-9.73462	2.14625e-22	5.21483e-21
gene-aldh6a1	831.872	-3.09164	0.398959	-7.74927	9.24248e-15	1.15313e-13
gene-mrpl36	542.626	-3.09163	0.344887	-8.96418	3.12599e-19	5.92291e-18
gene-kank1a	915.351	-3.09103	0.405294	-7.62665	2.4093e-14	2.8944e-13
gene-khsrp	4613.48	-3.09021	0.253843	-12.1737	4.29068e-34	2.1963e-32
gene-zgc:77739	74.4616	-3.08967	0.60764	-5.0847	3.68203e-07	1.8594e-06
gene-cped1-2	59.2331	-3.08936	0.949886	-3.25235	0.00114456	0.00311693
gene-ndufaf2	47.46	-3.08923	0.712949	-4.33303	1.47072e-05	5.7647e-05
gene-dnd1	994.089	-3.08878	0.300748	-10.2703	9.58758e-25	2.75003e-23
gene-gcat	706.041	-3.08869	0.334516	-9.23333	2.62339e-20	5.44023e-19
gene-mkrn2	433.212	-3.08842	0.351593	-8.7841	1.57625e-18	2.79825e-17
gene-triap1	119.754	-3.08806	0.543776	-5.67892	1.35552e-08	8.42554e-08
gene-ptrh1	299.553	-3.08803	0.504201	-6.1246	9.09131e-10	6.60887e-09
gene-gramd4b	824.757	-3.08618	0.533154	-5.78852	7.10073e-09	4.57844e-08
gene-top1mt	221.517	-3.08562	0.38356	-8.04468	8.64729e-16	1.19708e-14
gene-si:dkeyp-34c12.1	22.2565	-3.08338	0.998847	-3.08694	0.00202228	0.00521299
gene-cpox	555.858	-3.08326	0.315513	-9.77219	1.4822e-22	3.6389e-21
gene-prkcda	1354.58	-3.08232	0.283074	-10.8887	1.30419e-27	4.62739e-26
gene-si:ch211-218o21.4	29.3757	-3.08202	0.958624	-3.21505	0.00130422	0.00350385
gene-hiat1a	1949.42	-3.08179	0.293936	-10.4846	1.01712e-25	3.13999e-24
gene-si:dkey-21c1.6	81.3246	-3.08094	0.59895	-5.1439	2.6909e-07	1.38922e-06
gene-LOC103911953	254.532	-3.08056	0.458655	-6.71652	1.86112e-11	1.64298e-10
gene-zmynd11	564.437	-3.08025	0.39475	-7.80305	6.04293e-15	7.67245e-14
gene-zgc:113019	641.599	-3.07975	0.329136	-9.35708	8.19737e-21	1.79022e-19
gene-ctnnal1	342.33	-3.07948	0.344296	-8.94427	3.74406e-19	7.03736e-18
gene-si:ch73-44m9.1	193.155	-3.07791	0.707457	-4.35066	1.35726e-05	5.3483e-05
gene-rrm2	2810	-3.07717	0.414773	-7.41893	1.18074e-13	1.31424e-12
gene-hpca-2	145.285	-3.0768	0.54425	-5.65329	1.57403e-08	9.69303e-08
gene-palm1b	431.071	-3.07603	0.377014	-8.15894	3.37977e-16	4.88774e-15
gene-atg10	221.224	-3.07458	0.583069	-5.2731	1.34136e-07	7.23805e-07
gene-phldb2b	701.461	-3.07423	0.282775	-10.8717	1.57317e-27	5.52122e-26
gene-abhd18	469.382	-3.0741	0.313094	-9.81847	9.37557e-23	2.35535e-21
gene-rif1-2	1639.52	-3.07144	0.540924	-5.67813	1.36172e-08	8.46205e-08
gene-tcea1	1196.23	-3.07	0.323681	-9.48465	2.43193e-21	5.5254e-20
gene-ctnnbip1	910.836	-3.06974	0.303246	-10.1229	4.37087e-24	1.20436e-22
gene-plekhm1	859.884	-3.06727	0.514539	-5.96121	2.50382e-09	1.7202e-08
gene-ap5m1	421.378	-3.06603	0.379142	-8.08676	6.12716e-16	8.61561e-15
gene-rrs1	619.945	-3.06477	0.395505	-7.74902	9.26013e-15	1.15477e-13
gene-pwp2h	688.169	-3.06369	0.371182	-8.25388	1.53334e-16	2.28116e-15
gene-podxl2	909.189	-3.06306	0.493257	-6.20988	5.30262e-10	3.9603e-09
gene-gclm	741.512	-3.06186	0.272769	-11.2251	3.06985e-29	1.20291e-27
gene-nucks1a	2665.32	-3.06171	0.247662	-12.3625	4.17151e-35	2.27946e-33
gene-si:dkey-85a20.4	1659.22	-3.06132	0.319407	-9.5844	9.29964e-22	2.1661e-20
gene-taf5l	1187.67	-3.06127	0.346772	-8.8279	1.06658e-18	1.91711e-17
gene-dhx37	1277.53	-3.06097	0.381175	-8.03035	9.71965e-16	1.33554e-14
gene-zgc:64022	91.8684	-3.06028	0.685629	-4.46346	8.06481e-06	3.30674e-05
gene-LOC110439961	58.2072	-3.05981	0.684466	-4.47036	7.80871e-06	3.21037e-05
gene-si:dkeyp-2e4.3	118.547	-3.05912	0.642675	-4.75997	1.93619e-06	8.7689e-06
gene-gldc	2383.53	-3.05575	0.342386	-8.92487	4.46223e-19	8.33281e-18
gene-ssh2a	1427.07	-3.05572	0.300303	-10.1755	2.55196e-24	7.13806e-23
gene-tinf2	976.211	-3.05547	0.299724	-10.1943	2.10303e-24	5.92716e-23
gene-fkbpl	339.649	-3.05486	0.337064	-9.06313	1.26764e-19	2.48172e-18
gene-zgc:101583-2	149.358	-3.05172	0.725223	-4.20798	2.57666e-05	9.67921e-05
gene-zgc:154064-2	919.898	-3.05003	0.375873	-8.11452	4.87708e-16	6.93692e-15
gene-si:dkey-9i23.15	341.556	-3.04986	0.358964	-8.4963	1.95731e-17	3.15276e-16
gene-pcyox1l	841.357	-3.04947	0.299231	-10.191	2.17468e-24	6.12243e-23
gene-cdh18a	34.8928	-3.0493	1.01015	-3.01866	0.00253895	0.00639081
gene-bcl3	250.708	-3.04825	0.466074	-6.54026	6.14119e-11	5.108e-10
gene-cry-dash	781.401	-3.04769	0.266079	-11.4541	2.24293e-30	9.57072e-29
gene-LOC103909578	42.066	-3.04754	0.928065	-3.28376	0.00102431	0.00281822
gene-fbxl2	486.495	-3.04733	0.363432	-8.38488	5.07773e-17	7.89899e-16
gene-ttl	1696.58	-3.04659	0.295945	-10.2944	7.46604e-25	2.17035e-23
gene-si:ch211-165g14.1	1495.14	-3.04638	0.349202	-8.72384	2.68915e-18	4.67774e-17
gene-zgc:193538	341.567	-3.04592	0.327675	-9.29554	1.46455e-20	3.13498e-19
gene-atad3	236.728	-3.04495	0.436374	-6.97784	2.99743e-12	2.91757e-11
gene-pigm	237.878	-3.04454	0.470846	-6.46611	1.00559e-10	8.16741e-10
gene-nrip1b	525.671	-3.04431	0.344674	-8.83243	1.02428e-18	1.8462e-17
gene-ezrb	1243.22	-3.04412	0.341286	-8.91957	4.68108e-19	8.71637e-18
gene-gtf2f2b-2	24.2241	-3.0441	0.977597	-3.11387	0.00184654	0.0048
gene-LOC100535691	830.701	-3.04328	0.337321	-9.02191	1.84831e-19	3.56198e-18
gene-slc44a1b	306.892	-3.04306	0.349886	-8.69731	3.39843e-18	5.84869e-17
gene-traip	506.499	-3.04059	0.344031	-8.83813	9.73369e-19	1.76056e-17
gene-si:zfos-943e10.1	1211.67	-3.03996	0.28475	-10.6759	1.31981e-26	4.33811e-25
gene-galk1	213.452	-3.03969	0.405885	-7.48903	6.93843e-14	7.93081e-13
gene-zgc:154064	638.18	-3.03923	0.393535	-7.72289	1.13724e-14	1.40599e-13
gene-nudcd1	952.333	-3.03868	0.29576	-10.2741	9.21616e-25	2.64936e-23
gene-klhl18	437.101	-3.03862	0.372464	-8.15816	3.40175e-16	4.91679e-15
gene-ssr1	1079.15	-3.0374	0.389596	-7.7963	6.37506e-15	8.08226e-14
gene-slc7a6os	521.9	-3.03598	0.360294	-8.42639	3.565e-17	5.61319e-16
gene-anxa5b	874.462	-3.03595	0.505538	-6.00539	1.90873e-09	1.32898e-08
gene-dok6	86.7625	-3.03517	0.580063	-5.23248	1.67247e-07	8.88342e-07
gene-zdhhc24-2	77.8833	-3.03471	0.804037	-3.77434	0.000160431	0.000520421
gene-tnk1	658.518	-3.03445	0.324452	-9.35253	8.55742e-21	1.86571e-19
gene-rhogc	1508.39	-3.03333	0.238696	-12.7079	5.34446e-37	3.2725e-35
gene-zgc:110843	208.353	-3.03282	0.400768	-7.5675	3.80463e-14	4.48334e-13
gene-aktip-2	894.907	-3.03236	0.258523	-11.7296	8.99253e-32	4.1224e-30
gene-notch1a	2667.85	-3.03169	0.273599	-11.0808	1.55539e-28	5.83857e-27
gene-mpzl2b-2	225.884	-3.02963	0.727107	-4.1667	3.09045e-05	0.0001144
gene-LOC101885715	836.682	-3.028	0.400397	-7.5625	3.95395e-14	4.6445e-13
gene-plekhg2	327.781	-3.02786	0.609172	-4.97045	6.67961e-07	3.24594e-06
gene-rarab	247.617	-3.02742	0.409509	-7.39281	1.43761e-13	1.58381e-12
gene-cdc37l1	521.219	-3.02729	0.303599	-9.97133	2.0348e-23	5.34516e-22
gene-crp7	42.3657	-3.02619	0.845743	-3.57815	0.000346038	0.00104668
gene-snrpb2	659.855	-3.0247	0.411972	-7.34201	2.1041e-13	2.286e-12
gene-mrpl17	375.377	-3.02354	0.345409	-8.75351	2.06816e-18	3.64156e-17
gene-pvrl4	356.736	-3.02292	0.424183	-7.12646	1.02986e-12	1.04728e-11
gene-rpusd2	347.964	-3.0229	0.507552	-5.95585	2.58719e-09	1.77231e-08
gene-trmt12	370.834	-3.02095	0.34893	-8.65777	4.8108e-18	8.19766e-17
gene-znrd1	340.537	-3.02091	0.351586	-8.59222	8.5304e-18	1.42638e-16
gene-mllt1a	1138.5	-3.02045	0.288166	-10.4816	1.04899e-25	3.23066e-24
gene-trmo	368.493	-3.02043	0.353632	-8.54117	1.32868e-17	2.18641e-16
gene-lrrc8c	821.34	-3.02037	0.287526	-10.5047	8.22134e-26	2.55631e-24
gene-zgc:56095	1562.44	-3.02015	0.252673	-11.9528	6.27937e-33	3.00632e-31
gene-cd82b	1646.8	-3.02003	0.281756	-10.7186	8.32528e-27	2.77163e-25
gene-prrg4	800.098	-3.0194	0.27882	-10.8292	2.50284e-27	8.66657e-26
gene-ptdss1a	664.08	-3.01628	0.379331	-7.95159	1.84132e-15	2.46216e-14
gene-chpfb	125.877	-3.01605	0.625705	-4.82025	1.43378e-06	6.61965e-06
gene-agk	78.2371	-3.01363	0.566166	-5.32287	1.02143e-07	5.61461e-07
gene-pomgnt1-2	483.112	-3.01279	0.324513	-9.28406	1.63146e-20	3.46934e-19
gene-gas2l3	494.652	-3.01236	0.340795	-8.83922	9.63913e-19	1.74468e-17
gene-cluha	2495.81	-3.0122	0.324967	-9.26925	1.87468e-20	3.94444e-19
gene-bcl2l13	363.56	-3.01102	0.370321	-8.13084	4.2631e-16	6.0971e-15
gene-plekhg2-2	97.9058	-3.01047	0.650765	-4.62605	3.72697e-06	1.61696e-05
gene-qrsl1	448.611	-3.00978	0.356251	-8.44848	2.95109e-17	4.69221e-16
gene-ell	1572.82	-3.00863	0.256754	-11.7179	1.0317e-31	4.70457e-30
gene-si:dkey-110k5.6	638.219	-3.00854	0.439451	-6.84613	7.58769e-12	7.03396e-11
gene-si:dkey-253i9.4-3	602.377	-3.00843	0.768932	-3.91248	9.13541e-05	0.000310316
gene-rpp25a	30.8881	-3.0081	1.01069	-2.97628	0.00291768	0.00722405
gene-plekhb2-2	246.434	-3.00712	0.458341	-6.56088	5.34913e-11	4.48375e-10
gene-tbcc	664.851	-3.00655	0.326607	-9.20541	3.40363e-20	6.98553e-19
gene-adam8a	373.465	-3.00654	0.507042	-5.92958	3.03716e-09	2.06255e-08
gene-zgc:112356	2145.15	-3.00624	0.366426	-8.20421	2.32115e-16	3.40623e-15
gene-pomgnt2	307.591	-3.00563	0.378659	-7.93755	2.06208e-15	2.74319e-14
gene-trdmt1	423.378	-3.00374	0.366212	-8.20217	2.36091e-16	3.4587e-15
gene-bet1l	468.021	-3.00363	0.324547	-9.25485	2.14528e-20	4.49191e-19
gene-ccdc106b	227.388	-3.00344	0.415423	-7.22984	4.83572e-13	5.07291e-12
gene-smad2	2256.27	-3.00183	0.250191	-11.9982	3.63199e-33	1.76165e-31
gene-nr2c2ap	174.597	-3.00138	0.416445	-7.20714	5.71412e-13	5.94861e-12
gene-tia1l-2	1155.05	-3.00129	0.571984	-5.24715	1.54468e-07	8.24753e-07
gene-gbgt1l2	50.0728	-3.00104	0.749586	-4.0036	6.23867e-05	0.000217861
gene-timm9	280.555	-3.00082	0.401387	-7.47615	7.65339e-14	8.69432e-13
gene-LOC110437782-2	345.723	-3.00059	0.563571	-5.32423	1.0138e-07	5.57624e-07
gene-sept9a	1204.63	-3.0005	0.410616	-7.30732	2.72514e-13	2.92394e-12
gene-znf280d	1266.68	-3.00007	0.246102	-12.1904	3.49912e-34	1.8018e-32
gene-fubp3	551.838	-2.99917	0.329762	-9.09496	9.46176e-20	1.87362e-18
gene-eif4g2b-2	2020.39	-2.99535	0.525756	-5.69722	1.21778e-08	7.61511e-08
gene-LOC101884695	47.364	-2.99371	0.738775	-4.05227	5.07238e-05	0.000180368
gene-txnipb	52.2553	-2.99306	0.821872	-3.64176	0.000270785	0.000837276
gene-LOC100150296	542.856	-2.99209	0.29993	-9.97597	1.94202e-23	5.12336e-22
gene-scnm1	525.77	-2.99191	0.378552	-7.90356	2.71047e-15	3.56364e-14
gene-ubxn7	488.594	-2.99173	0.312482	-9.57411	1.02743e-21	2.38882e-20
gene-pvrl3b	1710.32	-2.99103	0.304841	-9.81178	1.0019e-22	2.50969e-21
gene-gapvd1	241.551	-2.9909	0.456104	-6.5575	5.47156e-11	4.57896e-10
gene-stard7	1638.01	-2.99087	0.265763	-11.2539	2.21576e-29	8.78873e-28
gene-tmed9	1772.45	-2.99016	0.254718	-11.7391	8.03271e-32	3.68892e-30
gene-hmgxb4a	30.5492	-2.98947	0.864334	-3.45869	0.000542808	0.00158094
gene-LOC100334269	23.2764	-2.98889	1.0179	-2.93633	0.00332118	0.008101
gene-rp2	1026.38	-2.98798	0.28079	-10.6413	1.91394e-26	6.23559e-25
gene-LOC100535814	154.392	-2.98709	0.493457	-6.0534	1.4182e-09	1.00546e-08
gene-pi15a	50.2327	-2.98689	0.902175	-3.31077	0.000930405	0.00258483
gene-arcn1a	1461.72	-2.98596	0.245556	-12.16	5.07382e-34	2.58695e-32
gene-LOC100331510	146.467	-2.98573	0.45305	-6.59028	4.39012e-11	3.71112e-10
gene-slc37a2	1702.92	-2.9836	0.333842	-8.93715	3.99349e-19	7.48448e-18
gene-xpo6-2	234.994	-2.98309	0.5967	-4.99932	5.75331e-07	2.82925e-06
gene-ldlrap1a	883.803	-2.98195	0.269828	-11.0513	2.16158e-28	7.99817e-27
gene-tmem168b-2	227.684	-2.98173	0.597951	-4.98658	6.1456e-07	3.00845e-06
gene-ubn2b-2	274.84	-2.98134	0.35913	-8.30155	1.02762e-16	1.55379e-15
gene-mark3b	868.646	-2.98133	0.285145	-10.4555	1.38324e-25	4.22493e-24
gene-tmem51b	587.429	-2.98084	0.291174	-10.2373	1.34926e-24	3.83192e-23
gene-f11r.1-2	189.862	-2.9805	0.851576	-3.49999	0.000465282	0.00137509
gene-bcl2l13-2	271.032	-2.97997	0.642404	-4.63878	3.50465e-06	1.52536e-05
gene-si:ch211-59d15.9	185.342	-2.97893	0.535228	-5.56572	2.61076e-08	1.56097e-07
gene-tmco3	358.863	-2.97847	0.406257	-7.33147	2.27636e-13	2.46694e-12
gene-ctsc	2489.66	-2.97829	0.354279	-8.40661	4.2202e-17	6.60468e-16
gene-zgc:152938	499.041	-2.97829	0.349129	-8.53063	1.45554e-17	2.37705e-16
gene-si:ch211-236h17.3	685.582	-2.97717	0.334065	-8.91193	5.01529e-19	9.29857e-18
gene-rdh14a	293.47	-2.97704	0.391004	-7.61384	2.66074e-14	3.18318e-13
gene-chn1	719.788	-2.97654	0.35559	-8.37073	5.72612e-17	8.85446e-16
gene-arrdc2	1025.19	-2.97614	0.487329	-6.10704	1.01495e-09	7.33489e-09
gene-hspd1	3390.95	-2.97516	0.276628	-10.7551	5.60637e-27	1.88585e-25
gene-rrm1	3849.22	-2.97512	0.287549	-10.3465	4.34166e-25	1.28665e-23
gene-nin	1589.67	-2.97493	0.333072	-8.93178	4.192e-19	7.84516e-18
gene-brpf3b	1304.05	-2.97279	0.274811	-10.8176	2.8422e-27	9.73753e-26
gene-ect2	2249.91	-2.97155	0.312067	-9.52215	1.69638e-21	3.88145e-20
gene-adgre14	29.8938	-2.97151	0.908211	-3.27183	0.00106854	0.0029287
gene-eed	627.97	-2.97059	0.355218	-8.36271	6.12937e-17	9.43857e-16
gene-vetz	670.777	-2.9699	0.326162	-9.10558	8.58064e-20	1.70435e-18
gene-ppfibp1a	288.534	-2.96856	0.564811	-5.25584	1.47348e-07	7.89177e-07
gene-patl1	1650.82	-2.96746	0.320002	-9.27325	1.80551e-20	3.8149e-19
gene-crls1	370.255	-2.96734	0.347192	-8.54669	1.26669e-17	2.08706e-16
gene-map7a	52.4862	-2.96698	0.751035	-3.95053	7.79788e-05	0.000267797
gene-arntl1a	1041.51	-2.96578	0.267694	-11.079	1.58645e-28	5.92939e-27
gene-trmt11	505.597	-2.96549	0.320282	-9.25898	2.06401e-20	4.32874e-19
gene-f3b	269.259	-2.96542	0.376367	-7.87905	3.29868e-15	4.30423e-14
gene-wars2	271.936	-2.96432	0.407159	-7.28051	3.32568e-13	3.54772e-12
gene-dcps	763.358	-2.96418	0.319032	-9.29116	1.52613e-20	3.25605e-19
gene-erlec1	1468.14	-2.96394	0.308702	-9.60128	7.89577e-22	1.84741e-20
gene-dph1	446.267	-2.96167	0.347544	-8.52171	1.57218e-17	2.55464e-16
gene-sox13	81.6007	-2.96145	0.6728	-4.40168	1.07416e-05	4.29812e-05
gene-atp6v1ab-2	165.976	-2.96121	0.528882	-5.599	2.15597e-08	1.30593e-07
gene-si:dkeyp-68b7.7	1109.29	-2.95851	0.248866	-11.888	1.36699e-32	6.41422e-31
gene-rab35b	723.887	-2.95802	0.325724	-9.08139	1.07193e-19	2.11295e-18
gene-chp2	391.895	-2.95694	0.359884	-8.21638	2.09731e-16	3.09882e-15
gene-si:ch211-212o1.2-2	102.53	-2.95693	0.536823	-5.5082	3.6253e-08	2.12105e-07
gene-plppr1	67.7614	-2.95629	0.684614	-4.31818	1.5732e-05	6.13575e-05
gene-si:dkey-79d12.4	578.26	-2.95588	0.435948	-6.78034	1.19892e-11	1.08312e-10
gene-abcb6a	1346.03	-2.95471	0.27103	-10.9018	1.13015e-27	4.02642e-26
gene-dip2cb	552.815	-2.95256	0.389747	-7.57559	3.57501e-14	4.22429e-13
gene-stx11a	228.977	-2.95207	0.383386	-7.69998	1.36084e-14	1.67206e-13
gene-kpnb3	8068.02	-2.952	0.402286	-7.33806	2.16709e-13	2.3505e-12
gene-fam172a	2206.1	-2.95084	0.271333	-10.8753	1.51079e-27	5.31671e-26
gene-jarid2b	1188.64	-2.95014	0.322671	-9.14288	6.08132e-20	1.22008e-18
gene-sec11a	143.282	-2.94966	0.520403	-5.66803	1.44447e-08	8.95695e-08
gene-zmp:0000001114	1366.27	-2.9495	0.310038	-9.51335	1.84611e-21	4.21658e-20
gene-badb-2	133.066	-2.94919	0.780983	-3.77626	0.000159202	0.000516922
gene-tle2	1056.23	-2.94883	0.356322	-8.27575	1.2765e-16	1.91224e-15
gene-st6gal2a	351.061	-2.94879	0.399212	-7.38653	1.50708e-13	1.65894e-12
gene-smyd2a	648.157	-2.94863	0.307159	-9.59968	8.01964e-22	1.8747e-20
gene-lcmt2-2	106.678	-2.94474	0.828447	-3.55453	0.000378652	0.00113776
gene-mdh1ab	404.937	-2.94373	0.38182	-7.70974	1.26075e-14	1.55351e-13
gene-si:ch211-129c21.1	147.509	-2.94373	0.648936	-4.53624	5.7266e-06	2.40904e-05
gene-zgc:163143	352.431	-2.94339	0.395758	-7.43735	1.02728e-13	1.15134e-12
gene-ints5	1395.89	-2.94215	0.240184	-12.2496	1.68825e-34	8.97891e-33
gene-cnp	4707.38	-2.94156	0.334871	-8.78415	1.57547e-18	2.79825e-17
gene-cpped1	57.2039	-2.94075	0.723109	-4.06682	4.76592e-05	0.000170241
gene-si:ch211-231f6.6	217.946	-2.94049	0.453025	-6.4908	8.53828e-11	7.00285e-10
gene-ptp4a3	796.267	-2.94013	0.28257	-10.405	2.35311e-25	7.08698e-24
gene-ganab	2790.2	-2.94011	0.364536	-8.06535	7.30247e-16	1.0158e-14
gene-ptprz1b	364.094	-2.93945	0.485957	-6.04879	1.45941e-09	1.03223e-08
gene-imp3	298.067	-2.93804	0.365318	-8.04242	8.80806e-16	1.21803e-14
gene-gramd1c	652.471	-2.93708	0.556228	-5.28036	1.28933e-07	6.97036e-07
gene-pde12	639.337	-2.93611	0.320074	-9.17322	4.59088e-20	9.32614e-19
gene-tm2d1	384.287	-2.93407	0.313805	-9.34999	8.76537e-21	1.90944e-19
gene-galnt13	191.081	-2.93353	0.500993	-5.85543	4.7579e-09	3.14213e-08
gene-adnp2a	1018.28	-2.93176	0.298339	-9.82697	8.61712e-23	2.16691e-21
gene-wdr6	583.579	-2.93122	0.506142	-5.79129	6.98462e-09	4.51257e-08
gene-cap1	1410.62	-2.9308	0.359874	-8.14395	3.82576e-16	5.50201e-15
gene-cog8	435.929	-2.93065	0.389754	-7.51923	5.50984e-14	6.36532e-13
gene-ufsp1	153.493	-2.93044	0.513413	-5.70776	1.14471e-08	7.20336e-08
gene-ago4	2145.6	-2.93	0.258191	-11.3482	7.57245e-30	3.09848e-28
gene-copz2-2	107.208	-2.92975	0.627423	-4.66949	3.01952e-06	1.32715e-05
gene-papd5	1296.85	-2.92971	0.262341	-11.1676	5.87594e-29	2.25805e-27
gene-nsun4	265.88	-2.92779	0.423552	-6.91248	4.76254e-12	4.51683e-11
gene-gal3st3	108.941	-2.92755	0.624675	-4.68652	2.77888e-06	1.22952e-05
gene-LOC110437968	436.674	-2.92654	0.483892	-6.04791	1.46736e-09	1.03757e-08
gene-mrps24	145.041	-2.92589	0.508324	-5.75596	8.61504e-09	5.49466e-08
gene-tgfa	349.745	-2.92462	0.335213	-8.72466	2.6697e-18	4.64704e-17
gene-aldh3b1	629.702	-2.92353	0.438808	-6.66243	2.69329e-11	2.3284e-10
gene-ric3a	52.2079	-2.92302	0.712536	-4.10228	4.09101e-05	0.000148052
gene-atf7b-2	108.179	-2.92124	0.739877	-3.94828	7.87133e-05	0.000269998
gene-si:dkey-121a9.3	129.026	-2.92077	0.748907	-3.90005	9.6174e-05	0.000325494
gene-gpr107	1334.82	-2.92044	0.24252	-12.042	2.13632e-33	1.04797e-31
gene-mmp11b	113.114	-2.91968	0.855037	-3.41468	0.000638562	0.00183567
gene-spns1-2	581.158	-2.91965	0.619739	-4.7111	2.4638e-06	1.0995e-05
gene-sema6e	548.06	-2.91772	0.413139	-7.06234	1.63725e-12	1.63479e-11
gene-pdlim1	545.522	-2.91728	0.286329	-10.1885	2.2308e-24	6.27361e-23
gene-LOC101887003	77.0539	-2.917	0.682313	-4.27517	1.90989e-05	7.34928e-05
gene-eif4a1a	5968.72	-2.91599	0.283781	-10.2755	9.09002e-25	2.61601e-23
gene-crb3b	395.396	-2.91554	0.364192	-8.00551	1.18974e-15	1.61676e-14
gene-dennd2db	713.272	-2.91503	0.341361	-8.53943	1.34883e-17	2.21816e-16
gene-si:ch211-102l7.3	76.0977	-2.91493	0.624337	-4.66884	3.02905e-06	1.33088e-05
gene-b4galnt3b	841.261	-2.91368	0.342093	-8.51722	1.63426e-17	2.64721e-16
gene-trmt61b	218.587	-2.91282	0.393366	-7.40485	1.31297e-13	1.45392e-12
gene-si:ch211-269i23.2-2	192.68	-2.91261	0.677608	-4.29837	1.72061e-05	6.65753e-05
gene-igdcc3	702.226	-2.9122	0.285621	-10.196	2.06537e-24	5.82735e-23
gene-pcgf3	148.097	-2.91209	0.48688	-5.98112	2.21602e-09	1.53182e-08
gene-slc25a34	35.716	-2.91087	0.816849	-3.56353	0.000365896	0.00110263
gene-sde2-2	153.605	-2.90967	0.793696	-3.66597	0.000246399	0.000769285
gene-erbb4b	255.312	-2.90883	0.560057	-5.1938	2.06042e-07	1.08139e-06
gene-mat2aa	4280.68	-2.90803	0.234409	-12.4058	2.43028e-35	1.35079e-33
gene-wu:fi37e09	786.261	-2.90777	0.387381	-7.50624	6.08504e-14	7.00483e-13
gene-rgs14a	619.106	-2.90728	0.363568	-7.99654	1.27965e-15	1.73349e-14
gene-dock1	1371.71	-2.90513	0.403056	-7.20776	5.68797e-13	5.92377e-12
gene-xkrx	502.257	-2.904	0.293751	-9.88594	4.79058e-23	1.22489e-21
gene-tmem55ba-3	33.3048	-2.90357	0.896317	-3.23944	0.00119763	0.00324576
gene-pnp4a	32.7372	-2.90341	0.917743	-3.16364	0.00155808	0.00411207
gene-dnmt3bb.2	1212.35	-2.9024	0.320045	-9.06874	1.20403e-19	2.36075e-18
gene-ica1	238.342	-2.90179	0.556144	-5.21769	1.8117e-07	9.57648e-07
gene-use1	644.869	-2.90169	0.274936	-10.5541	4.86518e-26	1.53862e-24
gene-fam26e.1	53.7996	-2.8989	0.738607	-3.92482	8.67934e-05	0.000295911
gene-abhd17b	450.317	-2.89797	0.310606	-9.33006	1.05813e-20	2.29537e-19
gene-calm2a-2	460.388	-2.89768	0.554826	-5.22269	1.76343e-07	9.33087e-07
gene-nos1	121.951	-2.89715	0.920954	-3.14581	0.00165625	0.004349
gene-bop1	1250.85	-2.89682	0.319828	-9.05743	1.3356e-19	2.60492e-18
gene-itga5	1228.63	-2.89669	0.567634	-5.10309	3.34146e-07	1.69701e-06
gene-chd7	7132.27	-2.8952	0.371531	-7.79261	6.56372e-15	8.29707e-14
gene-cdca8	2594.21	-2.89395	0.225172	-12.8522	8.36416e-38	5.34914e-36
gene-zgc:92066	1826.45	-2.89347	0.307004	-9.42489	4.30572e-21	9.63893e-20
gene-plekhd1	78.1892	-2.89226	0.730552	-3.95902	7.52594e-05	0.000259008
gene-mrpl9	400.774	-2.89125	0.337425	-8.56857	1.04774e-17	1.73848e-16
gene-fkbp10b	290.086	-2.891	0.418556	-6.90707	4.94763e-12	4.68351e-11
gene-mettl1	246.312	-2.89073	0.434386	-6.65475	2.83788e-11	2.44769e-10
gene-mob3a	756.905	-2.8906	0.30495	-9.47892	2.5694e-21	5.82751e-20
gene-dpp4	237.115	-2.89016	0.403129	-7.1693	7.53799e-13	7.75075e-12
gene-otulina	231.351	-2.88913	0.388834	-7.43023	1.08413e-13	1.21034e-12
gene-gig2p	144.605	-2.88903	0.453619	-6.36886	1.90442e-10	1.49837e-09
gene-saal1-2	202.378	-2.88898	0.604275	-4.7809	1.74515e-06	7.95374e-06
gene-LOC100537077	171.372	-2.88834	0.492638	-5.86299	4.54593e-09	3.00905e-08
gene-asf1ba	1056.02	-2.88683	0.30849	-9.35794	8.13079e-21	1.77868e-19
gene-si:dkeyp-97b10.3	474.31	-2.88612	0.371916	-7.76013	8.48407e-15	1.0626e-13
gene-fam131bb	49.7736	-2.88517	0.752599	-3.83361	0.000126275	0.000418562
gene-qrich1	211.657	-2.88509	0.593069	-4.86468	1.14643e-06	5.37479e-06
gene-rbfa	349.238	-2.88358	0.354194	-8.14124	3.91238e-16	5.61722e-15
gene-zgc:152891	593.386	-2.88317	0.385106	-7.48669	7.06334e-14	8.05227e-13
gene-pdzrn4	59.1453	-2.88213	0.655751	-4.39515	1.10694e-05	4.41839e-05
gene-rnf103	1090.98	-2.88142	0.310721	-9.27334	1.80408e-20	3.8149e-19
gene-llgl2	783.915	-2.88064	0.361847	-7.96093	1.70754e-15	2.29156e-14
gene-si:ch211-89o9.4	159.614	-2.87961	0.517296	-5.56666	2.59666e-08	1.5529e-07
gene-hspa4b-4	180.746	-2.8784	0.459226	-6.26793	3.65879e-10	2.79217e-09
gene-surf2	224.423	-2.87826	0.464092	-6.20192	5.57772e-10	4.1502e-09
gene-mapk14b	885.342	-2.87812	0.44798	-6.42466	1.32162e-10	1.05685e-09
gene-si:ch211-11k18.4	1562.23	-2.87798	0.318482	-9.03656	1.61679e-19	3.12977e-18
gene-itgb5	420.04	-2.87699	0.371616	-7.74183	9.79983e-15	1.21856e-13
gene-st6gal1	281.489	-2.8762	0.517666	-5.5561	2.75866e-08	1.64333e-07
gene-eif4ebp3l	761.031	-2.87608	0.380459	-7.5595	4.0463e-14	4.74223e-13
gene-vwa9-2	156.46	-2.87598	0.888512	-3.23685	0.00120857	0.00327153
gene-dact2	65.1274	-2.8753	0.991835	-2.89897	0.00374396	0.00903917
gene-uck2b	827.953	-2.87362	0.325253	-8.83502	1.00083e-18	1.80645e-17
gene-pwwp2b	677.291	-2.87344	0.276826	-10.3799	3.05936e-25	9.15017e-24
gene-rbm4.1	381.06	-2.87343	0.32439	-8.85795	8.1502e-19	1.48243e-17
gene-tram1-2	390.967	-2.87304	0.5464	-5.25814	1.45523e-07	7.80534e-07
gene-minpp1b	318.221	-2.87284	0.464081	-6.1904	6.00127e-10	4.45001e-09
gene-bcl2l10	1238.47	-2.87156	0.336876	-8.52408	1.54029e-17	2.50597e-16
gene-tmem51a-2	291.789	-2.87101	0.342828	-8.37447	5.54714e-17	8.58283e-16
gene-rtkn2b	219.334	-2.87018	0.577116	-4.97331	6.58192e-07	3.20147e-06
gene-ecd-2	548.453	-2.87017	0.45682	-6.28294	3.32228e-10	2.54512e-09
gene-urb2	2123.26	-2.86739	0.28743	-9.97594	1.94245e-23	5.12336e-22
gene-dnajc15	101.974	-2.86715	0.501252	-5.71998	1.06535e-08	6.72851e-08
gene-cnnm2a	379.897	-2.86686	0.424947	-6.7464	1.51563e-11	1.35273e-10
gene-wu:fc33b09	193.906	-2.86651	0.688156	-4.1655	3.10673e-05	0.00011492
gene-lrrc47	758.143	-2.86649	0.29642	-9.67035	4.02989e-22	9.63787e-21
gene-fgfr1b	406.505	-2.86569	0.356628	-8.03553	9.31726e-16	1.28502e-14
gene-ppan	668.204	-2.86565	0.377742	-7.58628	3.29222e-14	3.90617e-13
gene-cpt2-2	202.954	-2.86515	0.529225	-5.41386	6.16805e-08	3.50041e-07
gene-LOC100330644	644.85	-2.86431	0.285935	-10.0173	1.27908e-23	3.42601e-22
gene-LOC110439800	314.439	-2.86382	0.389059	-7.3609	1.82673e-13	1.98966e-12
gene-ogfod1	579.431	-2.8632	0.383064	-7.47447	7.75179e-14	8.79838e-13
gene-trub2	619.687	-2.86273	0.342239	-8.3647	6.02679e-17	9.30536e-16
gene-znhit3	224.937	-2.8623	0.410929	-6.96544	3.2737e-12	3.16743e-11
gene-LOC100535213	40.1225	-2.862	0.97364	-2.93948	0.00328763	0.00802723
gene-LOC110439853	562.117	-2.86114	0.337855	-8.46853	2.48507e-17	3.97075e-16
gene-klhl13	221.246	-2.86107	0.648861	-4.40937	1.0367e-05	4.15917e-05
gene-zgc:194215	56.6156	-2.85945	0.67937	-4.20897	2.56541e-05	9.63972e-05
gene-mrpl14	277	-2.85872	0.456252	-6.26567	3.71227e-10	2.82965e-09
gene-camsap3	1231.18	-2.85747	0.284748	-10.0351	1.0687e-23	2.88036e-22
gene-LOC110437880	125.763	-2.85728	0.620231	-4.6068	4.08918e-06	1.75937e-05
gene-mrpl49-2	156.267	-2.85569	0.594201	-4.80593	1.54034e-06	7.07756e-06
gene-rhov	126.497	-2.8549	0.730124	-3.91016	9.22366e-05	0.000313191
gene-blzf1	1114.11	-2.85436	0.291545	-9.79047	1.23726e-22	3.0725e-21
gene-rpusd4	230.855	-2.85422	0.462699	-6.16863	6.88829e-10	5.06857e-09
gene-rragca-2	103.654	-2.85368	0.641533	-4.44822	8.65831e-06	3.52497e-05
gene-LOC100007655	3044.17	-2.85339	0.353422	-8.0736	6.82529e-16	9.53516e-15
gene-sel1l	1587.79	-2.85272	0.474462	-6.01254	1.82643e-09	1.2751e-08
gene-ppp4r1l	1342.93	-2.85181	0.315805	-9.0303	1.71205e-19	3.30923e-18
gene-LOC101886015	219.472	-2.85154	0.444346	-6.41739	1.38631e-10	1.10618e-09
gene-ccdc130-2	251.224	-2.85137	0.55891	-5.10166	3.36685e-07	1.70856e-06
gene-mief1	1150.31	-2.84933	0.274502	-10.38	3.0573e-25	9.15017e-24
gene-spout1	446.904	-2.84603	0.330667	-8.60695	7.50332e-18	1.25952e-16
gene-tanc1a	734.652	-2.8455	0.470231	-6.05129	1.43692e-09	1.01688e-08
gene-acvr1ba	1637.17	-2.84445	0.276624	-10.2827	8.42961e-25	2.42865e-23
gene-cnpy4-2	123.797	-2.84405	0.598712	-4.75027	2.03143e-06	9.16817e-06
gene-bmpr1ba	469.693	-2.8434	0.307896	-9.23495	2.58405e-20	5.36724e-19
gene-gfod2	277.956	-2.84256	0.387187	-7.34158	2.11091e-13	2.29244e-12
gene-cers5	511.172	-2.84232	0.352183	-8.07059	6.99604e-16	9.76317e-15
gene-dap	126.467	-2.84223	0.556065	-5.11133	3.19904e-07	1.62946e-06
gene-dgcr8-2	491.587	-2.84214	0.624304	-4.5525	5.30133e-06	2.24179e-05
gene-elac2	1477.07	-2.84095	0.31711	-8.95888	3.27983e-19	6.2008e-18
gene-cdc42ep4b	551.926	-2.83953	0.351854	-8.07019	7.0191e-16	9.78481e-15
gene-fkrp	414.991	-2.83949	0.419611	-6.76696	1.31517e-11	1.18074e-10
gene-LOC100332428	675.167	-2.83874	0.369813	-7.67615	1.63935e-14	2.00192e-13
gene-myo10	238.961	-2.83858	0.536195	-5.29393	1.19713e-07	6.50583e-07
gene-hdr	533.874	-2.83776	0.362633	-7.82542	5.05977e-15	6.47495e-14
gene-sde2	121.696	-2.83703	0.962171	-2.94857	0.00319249	0.0078237
gene-ptrhd1	122.765	-2.83651	0.486713	-5.82789	5.61315e-09	3.67601e-08
gene-man2b1	1442.41	-2.83625	0.332814	-8.52205	1.56753e-17	2.54869e-16
gene-lamtor4	310.089	-2.83557	0.352377	-8.04699	8.48572e-16	1.17534e-14
gene-pitpnaa	1479.61	-2.83462	0.263116	-10.7733	4.60387e-27	1.55876e-25
gene-LOC101884037	100.832	-2.83416	0.636227	-4.45463	8.40368e-06	3.43102e-05
gene-det1	793.84	-2.83102	0.269352	-10.5105	7.7297e-26	2.41213e-24
gene-peo1	800.661	-2.83043	0.30431	-9.30113	1.38964e-20	2.98451e-19
gene-si:ch211-266o15.1	1345.47	-2.8299	0.301095	-9.39869	5.5247e-21	1.22304e-19
gene-mfsd12a	853.362	-2.82915	0.409156	-6.9146	4.69186e-12	4.45305e-11
gene-si:zfos-464b6.2	392.63	-2.82831	0.377675	-7.48874	6.95403e-14	7.94514e-13
gene-tyw3	414.709	-2.828	0.326593	-8.65909	4.75538e-18	8.10857e-17
gene-utp11l-2	114.599	-2.82672	0.478307	-5.90985	3.42422e-09	2.30725e-08
gene-ctdnep1b	1015.28	-2.82656	0.260669	-10.8435	2.14181e-27	7.45631e-26
gene-LOC110438156	336.958	-2.82609	0.337714	-8.36831	5.8452e-17	9.03321e-16
gene-btr16	245.407	-2.82551	0.413223	-6.83774	8.04536e-12	7.43163e-11
gene-tm7sf3	822.527	-2.82395	0.282768	-9.98681	1.74089e-23	4.61522e-22
gene-sar1ab	156.334	-2.82145	0.438774	-6.43031	1.27347e-10	1.02023e-09
gene-neil3	424.298	-2.8202	0.405613	-6.95295	3.57726e-12	3.43802e-11
gene-bxdc2	580.53	-2.82003	0.342987	-8.22197	2.00187e-16	2.96457e-15
gene-ctdsp1	571.409	-2.81937	0.427468	-6.59551	4.238e-11	3.58955e-10
gene-cdkn3	289.439	-2.81862	0.347416	-8.11311	4.93416e-16	7.00655e-15
gene-wu:fb69f10	4345.11	-2.81815	0.316268	-8.91063	5.07453e-19	9.39495e-18
gene-wls	1199.49	-2.81741	0.262244	-10.7435	6.35958e-27	2.13091e-25
gene-mogs	619.633	-2.81224	0.371897	-7.56188	3.97281e-14	4.66454e-13
gene-gdf5	61.4912	-2.81216	0.700853	-4.01249	6.00825e-05	0.000210439
gene-siae	132.345	-2.81163	0.583818	-4.81594	1.46505e-06	6.74961e-06
gene-top1l	3798.3	-2.81067	0.217187	-12.9412	2.63378e-38	1.73141e-36
gene-ubn2b	610.224	-2.8106	0.286383	-9.81412	9.78894e-23	2.45444e-21
gene-bzw1a	5090.44	-2.80902	0.28573	-9.83102	8.27777e-23	2.08563e-21
gene-pcbp2	2217.37	-2.80883	0.257091	-10.9255	8.70942e-28	3.11578e-26
gene-slc30a7-2	332.904	-2.8086	0.433184	-6.48363	8.95409e-11	7.32764e-10
gene-acadm	1876.77	-2.80837	0.384273	-7.30827	2.70611e-13	2.90713e-12
gene-txndc5	1690.32	-2.80686	0.302641	-9.27453	1.78398e-20	3.78435e-19
gene-selt1a	916.06	-2.80587	0.280824	-9.99156	1.65943e-23	4.40379e-22
gene-zgc:113294	109.709	-2.8052	0.552282	-5.0793	3.78828e-07	1.91118e-06
gene-zgc:112183	75.2312	-2.80441	0.580798	-4.82854	1.37536e-06	6.37152e-06
gene-slc25a1a	425.323	-2.80284	0.425515	-6.58693	4.49004e-11	3.7931e-10
gene-coq10b	430.988	-2.80228	0.351077	-7.98196	1.44032e-15	1.94503e-14
gene-nhp2	785.423	-2.8017	0.306965	-9.12712	7.03465e-20	1.41025e-18
gene-tmem60-2	262.872	-2.80151	0.865107	-3.23834	0.00120228	0.00325734
gene-gas5	396.447	-2.7999	0.311737	-8.98162	2.66813e-19	5.09641e-18
gene-ago3b	2395.35	-2.79977	0.264253	-10.5951	3.14148e-26	1.00827e-24
gene-mon1a	108.445	-2.79799	0.488005	-5.73352	9.83662e-09	6.23387e-08
gene-wdr25	296.575	-2.79573	0.458356	-6.09948	1.06417e-09	7.67116e-09
gene-ntm	126.379	-2.79563	0.589032	-4.74614	2.07332e-06	9.34743e-06
gene-si:dkey-152b24.7	160.298	-2.79442	0.50469	-5.53689	3.07888e-08	1.82027e-07
gene-dnajc5ab	736.958	-2.79282	0.313289	-8.9145	4.90014e-19	9.09158e-18
gene-trim2b	169.171	-2.79236	0.471125	-5.92699	3.08531e-09	2.0936e-08
gene-adcy1a	82.0922	-2.79197	0.657394	-4.24702	2.1663e-05	8.24772e-05
gene-dnajc1	1690.71	-2.79193	0.247279	-11.2906	1.46083e-29	5.87531e-28
gene-pdss2	239.985	-2.79173	0.393059	-7.10258	1.22445e-12	1.23884e-11
gene-LOC100332329	1593.96	-2.79134	0.305888	-9.12535	7.15042e-20	1.43125e-18
gene-gart	932.589	-2.7909	0.472533	-5.90625	3.49977e-09	2.35387e-08
gene-stk3-2	475.807	-2.78969	0.513631	-5.43132	5.5939e-08	3.19347e-07
gene-slc39a6	1012.36	-2.78921	0.402567	-6.92855	4.25186e-12	4.06075e-11
gene-tmem234	160.942	-2.78907	0.422259	-6.60511	3.97223e-11	3.37312e-10
gene-shmt1	1877.57	-2.7887	0.412888	-6.75412	1.43702e-11	1.28567e-10
gene-ece1	474.394	-2.78816	0.449549	-6.20213	5.57024e-10	4.14583e-09
gene-dnajc25	89.9242	-2.78792	0.789432	-3.53155	0.000413131	0.00123235
gene-xrcc2	168.287	-2.78747	0.454009	-6.13968	8.26853e-10	6.03957e-09
gene-fggy	173.329	-2.78694	0.77027	-3.61813	0.000296738	0.000909778
gene-ndufv3	272.263	-2.78647	0.435666	-6.3959	1.59607e-10	1.26537e-09
gene-gmcl1	993.487	-2.78521	0.253798	-10.9741	5.09095e-28	1.83395e-26
gene-gmppb	631.823	-2.78408	0.378335	-7.35876	1.8563e-13	2.02016e-12
gene-tmub1	784.675	-2.78404	0.278134	-10.0097	1.38179e-23	3.68968e-22
gene-zgc:165519	261.211	-2.78339	0.603891	-4.6091	4.04412e-06	1.74287e-05
gene-cd3eap	216.886	-2.78298	0.466254	-5.96881	2.38996e-09	1.64634e-08
gene-tmem251	720.547	-2.78279	0.31347	-8.87737	6.84598e-19	1.25313e-17
gene-dnaja1	505.8	-2.7816	0.381535	-7.29054	3.08707e-13	3.29996e-12
gene-tm2d3	547.437	-2.77825	0.293133	-9.47779	2.59729e-21	5.8856e-20
gene-zhx3	586.885	-2.77776	0.347548	-7.99245	1.32287e-15	1.78829e-14
gene-LOC110438533	130.554	-2.77738	0.508689	-5.45988	4.76459e-08	2.743e-07
gene-zdhhc23b	79.9967	-2.77709	0.797713	-3.48132	0.000498955	0.00146557
gene-rftn2	812.577	-2.77657	0.318938	-8.70566	3.15745e-18	5.45207e-17
gene-klhl11	762.705	-2.77651	0.336357	-8.25465	1.52344e-16	2.26774e-15
gene-baxb	141.676	-2.77639	0.502231	-5.52812	3.23682e-08	1.90582e-07
gene-ptenb	1234.17	-2.77614	0.279292	-9.93993	2.79025e-23	7.25605e-22
gene-sdad1	1167.32	-2.77568	0.316244	-8.77702	1.67863e-18	2.97389e-17
gene-ctu1	596.74	-2.77525	0.35476	-7.8229	5.16187e-15	6.59909e-14
gene-vps54	1107.39	-2.77507	0.281661	-9.85252	6.68492e-23	1.69253e-21
gene-mcm10	619.559	-2.77442	0.27597	-10.0533	8.87983e-24	2.40331e-22
gene-ndrg1a	2010.88	-2.77369	0.318247	-8.71554	2.89382e-18	5.01692e-17
gene-fam84a	109.77	-2.77353	0.545113	-5.08799	3.61879e-07	1.82959e-06
gene-srsf6a	1947.59	-2.77349	0.305192	-9.08768	1.01177e-19	1.99893e-18
gene-adnpb-2	798.172	-2.77301	0.624166	-4.44275	8.88171e-06	3.61082e-05
gene-sulf1	809.673	-2.77235	0.474	-5.84885	4.94997e-09	3.26066e-08
gene-zgc:162160	139.401	-2.77233	0.542935	-5.10618	3.28733e-07	1.67181e-06
gene-polr3e	1843.2	-2.77213	0.24916	-11.1259	9.38668e-29	3.56487e-27
gene-cpm-3	219.09	-2.77213	0.372029	-7.45139	9.23636e-14	1.03833e-12
gene-whsc1l1	2898.22	-2.77197	0.278524	-9.95237	2.46258e-23	6.42329e-22
gene-tango6-2	459.781	-2.77195	0.414265	-6.69125	2.21276e-11	1.93624e-10
gene-rab33ba	356.896	-2.77142	0.333944	-8.29905	1.04943e-16	1.58399e-15
gene-carm1	1360.07	-2.77095	0.31922	-8.68037	3.94476e-18	6.76196e-17
gene-panx1a	507.912	-2.77072	0.461332	-6.00591	1.90267e-09	1.32547e-08
gene-znf1173	101.876	-2.7699	0.525717	-5.2688	1.37316e-07	7.39575e-07
gene-si:ch73-181d5.4	2317.04	-2.76835	0.32643	-8.48068	2.23872e-17	3.59041e-16
gene-si:dkey-110c1.10	98.4692	-2.7682	0.516879	-5.35561	8.52662e-08	4.74154e-07
gene-zgc:173742	606.776	-2.76583	0.332412	-8.32047	8.76144e-17	1.33331e-15
gene-mrpl46	259.974	-2.76548	0.368638	-7.50189	6.2902e-14	7.22494e-13
gene-sptlc2a	455.683	-2.76447	0.434977	-6.35544	2.07837e-10	1.63078e-09
gene-actr5	315.608	-2.76356	0.342405	-8.071	6.97228e-16	9.73526e-15
gene-ca10a	141.663	-2.76263	0.529544	-5.217	1.81844e-07	9.6082e-07
gene-ndufaf2-2	55.3146	-2.76162	0.667753	-4.13569	3.5389e-05	0.000129611
gene-atp6v1b2-2	333.851	-2.7616	0.9625	-2.8692	0.00411514	0.0098345
gene-klhl13-3	198.275	-2.76143	0.68876	-4.00928	6.09054e-05	0.000213091
gene-rhot1a	960.794	-2.75728	0.255766	-10.7805	4.25766e-27	1.44343e-25
gene-pycr3	546.348	-2.7572	0.336031	-8.2052	2.30207e-16	3.38015e-15
gene-pgam1b	590.406	-2.75636	0.279083	-9.87649	5.26433e-23	1.34072e-21
gene-zgc:86839	436.705	-2.75421	0.349761	-7.87454	3.42012e-15	4.4582e-14
gene-qtrtd1-2	118.449	-2.75273	0.511513	-5.38156	7.38441e-08	4.13811e-07
gene-them4	180.049	-2.75203	0.43381	-6.34387	2.2406e-10	1.74695e-09
gene-ptena	28.0867	-2.75165	0.940712	-2.92507	0.00344381	0.00837383
gene-mettl16	401.467	-2.7514	0.314708	-8.7427	2.27611e-18	3.99143e-17
gene-hk2-2	287.909	-2.7509	0.490687	-5.60622	2.06791e-08	1.25701e-07
gene-hbegfb	93.0168	-2.75089	0.611932	-4.49542	6.94327e-06	2.8774e-05
gene-golt1bb	658.47	-2.75085	0.334166	-8.23197	1.84153e-16	2.73025e-15
gene-med22	350.568	-2.75047	0.323132	-8.51189	1.71119e-17	2.76491e-16
gene-fxn	545.32	-2.7498	0.308316	-8.91877	4.71495e-19	8.77313e-18
gene-mvk	293.949	-2.74827	0.423817	-6.48457	8.89847e-11	7.28673e-10
gene-hdlbpa	9024.07	-2.74825	0.408092	-6.73438	1.64634e-11	1.46486e-10
gene-sfxn5a	60.8457	-2.74802	0.639116	-4.29973	1.71008e-05	6.62173e-05
gene-si:dkey-217l24.1	64.75	-2.74621	0.735954	-3.7315	0.000190343	0.000608052
gene-si:ch73-167i17.6	88.3807	-2.74602	0.563937	-4.86937	1.11954e-06	5.25502e-06
gene-dna2-2	1016.97	-2.74484	0.396702	-6.91914	4.54399e-12	4.31904e-11
gene-pkn2	1323.97	-2.74469	0.244718	-11.2157	3.41328e-29	1.33546e-27
gene-surf6	154.31	-2.744	0.439402	-6.24485	4.24218e-10	3.2062e-09
gene-igf2bp1	472.533	-2.74277	0.326634	-8.39707	4.57746e-17	7.13791e-16
gene-gatsl2	930.047	-2.74188	0.293411	-9.34482	9.20427e-21	2.00168e-19
gene-ndufaf4	98.1835	-2.74137	0.511076	-5.36391	8.14389e-08	4.54308e-07
gene-zgc:136472-2	170.593	-2.74117	0.466768	-5.87265	4.28888e-09	2.84764e-08
gene-armc1	863.856	-2.73959	0.282901	-9.68393	3.5289e-22	8.48674e-21
gene-tshz1	1292.62	-2.73922	0.350013	-7.82607	5.03366e-15	6.44473e-14
gene-rai14	552.405	-2.73866	0.617509	-4.43501	9.20682e-06	3.73226e-05
gene-plekhb2	348.05	-2.73696	0.341809	-8.00729	1.1726e-15	1.59598e-14
gene-gpatch3	381.673	-2.73657	0.338951	-8.07366	6.82214e-16	9.53516e-15
gene-znf511	189.438	-2.73634	0.409882	-6.67593	2.45672e-11	2.13815e-10
gene-rapgef1b	1198.39	-2.73611	0.26086	-10.4888	9.72591e-26	3.01119e-24
gene-zgc:171965	48.5184	-2.73574	0.716185	-3.81988	0.000133519	0.000440432
gene-nptna	141.465	-2.73562	0.487748	-5.60867	2.03893e-08	1.23997e-07
gene-plpp2b-2	168.837	-2.73547	0.614359	-4.45255	8.48552e-06	3.4617e-05
gene-pogza	1340.07	-2.73546	0.360611	-7.58563	3.30874e-14	3.92218e-13
gene-si:dkey-34l15.2-2	29.7049	-2.73372	0.92245	-2.96354	0.0030412	0.00750049
gene-si:dkey-30k6.5	937.9	-2.73279	0.305315	-8.95073	3.53135e-19	6.66173e-18
gene-mppe1	423.852	-2.73244	0.36762	-7.43277	1.06345e-13	1.18982e-12
gene-col4a3bpa	78.4848	-2.73141	0.887135	-3.07891	0.00207756	0.0053405
gene-fmr1	793.128	-2.73044	0.299862	-9.10565	8.5752e-20	1.70435e-18
gene-tob1a	632.065	-2.73033	0.299613	-9.11288	8.02267e-20	1.59842e-18
gene-cbx1a-2	120.275	-2.73017	0.471579	-5.78942	7.06287e-09	4.5563e-08
gene-atp2c1	1634.75	-2.73012	0.296544	-9.20647	3.37034e-20	6.9227e-19
gene-LOC100536757	163.552	-2.73009	0.524267	-5.20744	1.91459e-07	1.00895e-06
gene-mpp2a	48.225	-2.72957	0.73318	-3.72291	0.000196937	0.000627258
gene-bmt2-2	197.068	-2.7276	0.496844	-5.48985	4.02284e-08	2.33727e-07
gene-commd8	169.327	-2.72748	0.411352	-6.63053	3.34474e-11	2.86104e-10
gene-gnb1l	246.378	-2.72687	0.380052	-7.17499	7.23146e-13	7.44444e-12
gene-mettl13	428.762	-2.72523	0.378887	-7.19272	6.35151e-13	6.58569e-12
gene-mnta	426.038	-2.72448	0.447529	-6.08783	1.14452e-09	8.22079e-09
gene-polr1b-2	272.299	-2.72358	0.402466	-6.76722	1.31285e-11	1.17906e-10
gene-suv39h1b	1119.79	-2.72316	0.264574	-10.2926	7.60717e-25	2.20395e-23
gene-snx18a	114.751	-2.72237	0.550199	-4.94798	7.49882e-07	3.60882e-06
gene-sgpp2	159.499	-2.72148	0.47416	-5.73958	9.49129e-09	6.02386e-08
gene-fam83c	232.23	-2.72095	0.568126	-4.78934	1.67332e-06	7.65333e-06
gene-zgc:113054	385.033	-2.72079	0.599132	-4.54122	5.59288e-06	2.35662e-05
gene-arsa	140.007	-2.71986	0.477583	-5.69505	1.23334e-08	7.70309e-08
gene-irf2bp2a	830.086	-2.71943	0.27637	-9.83982	7.58457e-23	1.91283e-21
gene-nop58	1529.21	-2.71906	0.253449	-10.7282	7.50113e-27	2.50047e-25
gene-prss16	374.033	-2.71866	0.371495	-7.31816	2.51399e-13	2.71199e-12
gene-tmem246	739.891	-2.71854	0.36863	-7.37472	1.64695e-13	1.80218e-12
gene-si:dkey-114g7.4	1640.76	-2.71784	0.34949	-7.77657	7.45166e-15	9.36919e-14
gene-cnep1r1	624.735	-2.7177	0.356878	-7.61521	2.63272e-14	3.15275e-13
gene-ano5b	1163.19	-2.71762	0.370912	-7.32687	2.35588e-13	2.55206e-12
gene-si:ch211-59o9.10	923.006	-2.71686	0.304584	-8.9199	4.66704e-19	8.69648e-18
gene-sec62	489.006	-2.71665	0.316561	-8.58176	9.34352e-18	1.55631e-16
gene-si:ch211-67f13.7	269.416	-2.71604	0.38958	-6.97172	3.13088e-12	3.03833e-11
gene-zgc:55262	804.926	-2.71516	0.288444	-9.4131	4.81694e-21	1.07185e-19
gene-desi2	1342.58	-2.71442	0.255814	-10.6109	2.65086e-26	8.5292e-25
gene-polr3c	487.306	-2.7143	0.412951	-6.57293	4.93335e-11	4.15541e-10
gene-prpf38a-2	300.874	-2.71354	0.382328	-7.09741	1.27116e-12	1.2836e-11
gene-spop	1151.8	-2.71331	0.273584	-9.91762	3.48973e-23	8.99378e-22
gene-diexf	894.201	-2.71272	0.255147	-10.632	2.11533e-26	6.85723e-25
gene-traf3ip2a	91.5833	-2.71213	0.54958	-4.93492	8.01836e-07	3.84243e-06
gene-si:dkey-103i16.6	125.579	-2.71121	0.660262	-4.10626	4.02111e-05	0.000145776
gene-paics	1151.34	-2.71119	0.303073	-8.94566	3.69733e-19	6.95459e-18
gene-wu:fa25f02	909.373	-2.71012	0.338516	-8.00589	1.18607e-15	1.61262e-14
gene-pik3c2a	338.599	-2.70957	0.401762	-6.7442	1.53871e-11	1.37191e-10
gene-rasa1a	1102.69	-2.70776	0.291012	-9.3046	1.34492e-20	2.89325e-19
gene-si:ch73-281k2.5	73.7779	-2.70774	0.732071	-3.69874	0.000216671	0.000683972
gene-chd8-2	982.001	-2.70659	0.26415	-10.2464	1.22812e-24	3.50711e-23
gene-tmc1	68.1231	-2.7058	0.737711	-3.66783	0.000244619	0.000764188
gene-zgc:153343	268.087	-2.70484	0.373399	-7.24384	4.36171e-13	4.60925e-12
gene-acss1	222.705	-2.70443	0.511434	-5.28793	1.23709e-07	6.70892e-07
gene-abhd17ab	270.49	-2.70322	0.407002	-6.64178	3.09907e-11	2.65968e-10
gene-tipin-2	289.765	-2.70321	0.412103	-6.55955	5.39706e-11	4.521e-10
gene-sox4b	165.129	-2.70191	0.423135	-6.38545	1.70894e-10	1.35031e-09
gene-btbd6b-2	47.2022	-2.70113	0.689223	-3.91909	8.88848e-05	0.000302563
gene-hspa9-2	1805.04	-2.69835	0.287286	-9.39255	5.85635e-21	1.29434e-19
gene-rrp8	89.0345	-2.698	0.622726	-4.33257	1.47377e-05	5.77488e-05
gene-si:ch1073-15f19.2	65.0045	-2.69762	0.619226	-4.35644	1.32193e-05	5.21544e-05
gene-sin3b	1562.39	-2.69748	0.30273	-8.91052	5.07955e-19	9.39753e-18
gene-atxn7l2b	616.774	-2.69733	0.338743	-7.96277	1.68233e-15	2.26006e-14
gene-slx1b	426.042	-2.697	0.309084	-8.72577	2.64369e-18	4.60486e-17
gene-got2b	1704.23	-2.69619	0.299409	-9.00504	2.15597e-19	4.13642e-18
gene-znf131	152.938	-2.69597	0.443848	-6.07408	1.247e-09	8.92222e-09
gene-LOC108190350	455.672	-2.69357	0.3752	-7.17903	7.02068e-13	7.24184e-12
gene-gorab	623.045	-2.69354	0.310015	-8.68843	3.6748e-18	6.30756e-17
gene-ppdpfb	1307.04	-2.69303	0.358391	-7.51423	5.72488e-14	6.60785e-13
gene-tp53i11b	1276.03	-2.69294	0.266464	-10.1062	5.18626e-24	1.42298e-22
gene-smpd1	580.649	-2.69184	0.315424	-8.53402	1.41343e-17	2.31852e-16
gene-ergic3	577.609	-2.69082	0.278753	-9.65308	4.77005e-22	1.1314e-20
gene-alpl	377.391	-2.69043	0.564312	-4.76763	1.86407e-06	8.47189e-06
gene-ppp4r2a	1248.98	-2.69024	0.260246	-10.3373	4.77816e-25	1.41116e-23
gene-capn5a	496.808	-2.69012	0.302696	-8.88719	6.26713e-19	1.15124e-17
gene-zgc:66448	1277.77	-2.68969	0.23997	-11.2084	3.70838e-29	1.44437e-27
gene-gcfc2	877.58	-2.68944	0.270189	-9.9539	2.42496e-23	6.33155e-22
gene-zp3d.2	1286.59	-2.68898	0.286461	-9.38687	6.1807e-21	1.3636e-19
gene-sumo3b	2169.07	-2.6888	0.30605	-8.7855	1.55665e-18	2.7689e-17
gene-rexo4	497.443	-2.68752	0.320828	-8.37683	5.4374e-17	8.42309e-16
gene-gpc2	201.032	-2.68629	0.625337	-4.29575	1.74101e-05	6.73242e-05
gene-c1d	562.113	-2.68583	0.292917	-9.16928	4.76195e-20	9.63587e-19
gene-srfbp1	710.006	-2.68527	0.301385	-8.90978	5.11325e-19	9.45312e-18
gene-LOC110440214	298.954	-2.68412	0.408682	-6.56774	5.10844e-11	4.29311e-10
gene-sh3rf1	1199.69	-2.68375	0.279021	-9.61845	6.68329e-22	1.56939e-20
gene-nol12	400.506	-2.68366	0.41079	-6.53291	6.45023e-11	5.35644e-10
gene-specc1lb	1145.3	-2.68362	0.319011	-8.41231	4.02011e-17	6.31061e-16
gene-rrp1	508.756	-2.6835	0.387815	-6.91954	4.53115e-12	4.30841e-11
gene-rfwd3	1599.18	-2.68219	0.263894	-10.1639	2.87351e-24	7.99428e-23
gene-chp2-2	58.1468	-2.68205	0.665907	-4.02767	5.63327e-05	0.000198594
gene-rfwd2	1835.79	-2.68143	0.301763	-8.88587	6.34217e-19	1.1642e-17
gene-lsr	1277.08	-2.67925	0.263344	-10.1739	2.59204e-24	7.24234e-23
gene-snx9a	641.761	-2.6791	0.276228	-9.69888	3.0482e-22	7.34431e-21
gene-sp1	303.178	-2.67859	0.413344	-6.4803	9.15402e-11	7.48416e-10
gene-cbln1	89.3015	-2.67789	0.581144	-4.60797	4.06624e-06	1.75066e-05
gene-ankrd37	74.0991	-2.67711	0.730725	-3.66364	0.000248658	0.000775609
gene-si:ch73-95l15.5	1136.84	-2.67697	0.246181	-10.874	1.53336e-27	5.38882e-26
gene-slc2a8	401.485	-2.67667	0.313655	-8.53379	1.41624e-17	2.32018e-16
gene-tob1b	940.505	-2.6765	0.288722	-9.27018	1.85832e-20	3.91639e-19
gene-chid1	289.947	-2.67611	0.432212	-6.19165	5.95384e-10	4.41737e-09
gene-LOC101882378	80.4095	-2.67602	0.910018	-2.94062	0.00327552	0.00800144
gene-si:ch73-352p4.8	54.7253	-2.67546	0.69067	-3.87372	0.000107185	0.00035975
gene-cbr1	622.737	-2.67535	0.329526	-8.11877	4.70935e-16	6.70202e-15
gene-sept15	296.891	-2.67516	0.583467	-4.58493	4.54139e-06	1.94135e-05
gene-rasa4	41.8599	-2.67262	0.824472	-3.24162	0.00118853	0.00322314
gene-med14	1672.71	-2.67256	0.276469	-9.66676	4.17378e-22	9.97279e-21
gene-LOC561565-2	32.9254	-2.67252	0.845874	-3.15948	0.00158054	0.00416709
gene-zgc:162339	204.241	-2.6723	0.403161	-6.62837	3.39421e-11	2.90239e-10
gene-LOC110440070	261.498	-2.67224	0.501006	-5.33374	9.62077e-08	5.30638e-07
gene-tmem263-2	386.456	-2.67162	0.590858	-4.5216	6.13752e-06	2.57022e-05
gene-lmx1a	165.845	-2.67096	0.517999	-5.15629	2.51886e-07	1.30534e-06
gene-nifk	796.34	-2.67062	0.46348	-5.7621	8.30762e-09	5.31167e-08
gene-trpm4b.1	176.079	-2.66979	0.63395	-4.21136	2.53833e-05	9.54274e-05
gene-serpinb1l3	439.238	-2.66956	0.41353	-6.45554	1.07836e-10	8.72012e-10
gene-cmtm6	638.746	-2.66935	0.286848	-9.30579	1.33e-20	2.86353e-19
gene-pou2f1a	701.539	-2.66893	0.342432	-7.79406	6.48913e-15	8.20679e-14
gene-ddx39aa	2767.43	-2.6689	0.252749	-10.5595	4.59196e-26	1.45577e-24
gene-mlec	547.853	-2.66659	0.293124	-9.09714	9.27439e-20	1.84074e-18
gene-gipc2	235.961	-2.66602	0.386043	-6.90602	4.98453e-12	4.71528e-11
gene-slc4a7	1704.15	-2.66432	0.300299	-8.87224	7.16877e-19	1.31036e-17
gene-bcl7ba	390.146	-2.66388	0.373226	-7.13744	9.50842e-13	9.70361e-12
gene-sept5a	110.427	-2.66362	0.669319	-3.97959	6.90335e-05	0.000239202
gene-klhl15	736.922	-2.66222	0.299162	-8.89895	5.638e-19	1.04084e-17
gene-thumpd1	179.008	-2.661	0.442957	-6.00735	1.88579e-09	1.31407e-08
gene-acads	306.416	-2.658	0.517409	-5.13713	2.7896e-07	1.43731e-06
gene-nfkbiab	894.891	-2.65724	0.459876	-5.77818	7.55127e-09	4.85403e-08
gene-p4ha1b	49.2759	-2.65704	0.785536	-3.38245	0.000718421	0.00204235
gene-stard3	644.996	-2.65671	0.42289	-6.28228	3.33642e-10	2.55519e-09
gene-smim12	398.901	-2.65661	0.374438	-7.09495	1.29402e-12	1.30566e-11
gene-LOC108183667	48.541	-2.65634	0.880357	-3.01734	0.00255002	0.00641494
gene-got2a-2	322.384	-2.65602	0.47145	-5.63371	1.7637e-08	1.07892e-07
gene-l2hgdh	265.04	-2.65517	0.372937	-7.11963	1.08218e-12	1.09791e-11
gene-atp6v1ab	130.261	-2.6541	0.64985	-4.08418	4.42335e-05	0.000159146
gene-wdr43	2619.2	-2.65406	0.357578	-7.42232	1.15087e-13	1.28265e-12
gene-sap18	183.061	-2.65363	0.639524	-4.14938	3.33377e-05	0.000122639
gene-ptp4a2b	1750.98	-2.65308	0.255641	-10.3781	3.11792e-25	9.31456e-24
gene-zgc:92480-2	88.9343	-2.65282	0.660974	-4.0135	5.98262e-05	0.000209626
gene-si:ch211-94l19.4	505.695	-2.65201	0.446852	-5.93488	2.94062e-09	1.99908e-08
gene-mrpl3	473.984	-2.65174	0.343345	-7.72324	1.13413e-14	1.40282e-13
gene-cog1	974.184	-2.6509	0.251808	-10.5275	6.45488e-26	2.02652e-24
gene-ppp2r5ea	1906.87	-2.65009	0.227676	-11.6398	2.58749e-31	1.15152e-29
gene-mcee	173.394	-2.64973	0.477265	-5.55191	2.82572e-08	1.67942e-07
gene-fam222bb	1281.65	-2.64948	0.311555	-8.50404	1.83099e-17	2.95112e-16
gene-fbxw11a	1709.28	-2.64876	0.288364	-9.18549	4.09639e-20	8.3478e-19
gene-suclg2-2	72.4875	-2.64799	0.758332	-3.49186	0.000479672	0.00141326
gene-taf1a	330.261	-2.64728	0.526243	-5.03054	4.89106e-07	2.42921e-06
gene-b3galt6	333.849	-2.64711	0.534256	-4.95476	7.24178e-07	3.49552e-06
gene-ncbp1	219.345	-2.64594	0.436986	-6.05497	1.4044e-09	9.96585e-09
gene-zcchc7	328.729	-2.64571	0.534125	-4.95336	7.29441e-07	3.51895e-06
gene-uba3-2	116.267	-2.64548	0.790872	-3.34502	0.000822761	0.00231031
gene-lrrc42	424.799	-2.6445	0.306184	-8.63696	5.77299e-18	9.77295e-17
[truncated: 1,338 more rows]

## Sheet: GSE142352_Ovary-downregulated
gene_id	baseMean	log2FoldChange	lfcSE	stat	pvalue	padj
gene-LOC103910262-2	188.781	23.6109	4.78504	4.93431	8.04333e-07	3.85368e-06
gene-dnajc9	139.172	23.3537	4.78515	4.88045	1.05844e-06	4.98178e-06
gene-si:dkey-193p11.2	101.956	22.9211	4.7853	4.78989	1.66869e-06	7.63564e-06
gene-si:ch211-37e10.1	81.3666	22.6062	4.78544	4.72395	2.31306e-06	1.03688e-05
gene-zgc:162239	1627.48	14.2078	1.47441	9.63623	5.62147e-22	1.32365e-20
gene-si:dkeyp-50b9.1	1388.62	13.9789	1.47465	9.47946	2.55595e-21	5.80208e-20
gene-ttc29-2	833.281	13.242	1.47598	8.9717	2.91975e-19	5.54839e-18
gene-dcst1	796.307	13.1764	1.5112	8.71917	2.80241e-18	4.8617e-17
gene-rsph9	644.379	12.8711	1.47964	8.69879	3.35435e-18	5.77666e-17
gene-si:ch73-111k22.3	554.626	12.6546	1.49857	8.44443	3.05523e-17	4.85481e-16
gene-si:ch211-209a2.2	507.542	12.5267	1.48597	8.42997	3.45741e-17	5.45706e-16
gene-si:ch73-302o18.2	374.055	12.0866	1.49182	8.10192	5.4097e-16	7.64829e-15
gene-LOC110437964	318.746	11.8558	1.50196	7.89358	2.93649e-15	3.85104e-14
gene-LOC110440081	311.952	11.8246	1.49215	7.92451	2.29044e-15	3.03762e-14
gene-rab36	813.689	11.7654	1.44871	8.12134	4.61071e-16	6.57249e-15
gene-si:ch211-81a5.5	804.939	11.7496	1.45208	8.09154	5.89141e-16	8.29311e-15
gene-si:ch211-181d7.3	291.476	11.7263	1.53703	7.62919	2.36228e-14	2.84318e-13
gene-ccdc151-2	268.54	11.6082	1.50506	7.71276	1.2313e-14	1.51867e-13
gene-LOC103911664	258.779	11.5547	1.53582	7.52347	5.33432e-14	6.17631e-13
gene-LOC108191543	699.997	11.5518	1.48185	7.7955	6.41531e-15	8.12533e-14
gene-dnah9	3416.1	11.5186	0.728424	15.813	2.53083e-56	3.85595e-54
gene-LOC100149647-2	247.894	11.493	1.49937	7.66522	1.78527e-14	2.17295e-13
gene-wdr66-2	637.492	11.4104	1.51264	7.54336	4.58018e-14	5.32935e-13
gene-cremb	229.929	11.3847	1.51159	7.5316	5.01231e-14	5.81127e-13
gene-meiob	219.928	11.3199	1.55765	7.26731	3.66707e-13	3.89905e-12
gene-trim35-14	215.827	11.2931	1.50415	7.50794	6.00668e-14	6.9177e-13
gene-ppp1r32	213.88	11.2799	1.50639	7.48807	6.98948e-14	7.97417e-13
gene-si:ch1073-526c11.3	209.635	11.2511	1.50496	7.476	7.66205e-14	8.70034e-13
gene-ppp1r36	205.475	11.2221	1.50649	7.44921	9.39021e-14	1.05471e-12
gene-si:dkey-86l18.10	205.198	11.2202	1.50648	7.44794	9.48081e-14	1.06396e-12
gene-si:ch211-80h18.1	545.892	11.189	1.45454	7.69249	1.44297e-14	1.76962e-13
gene-prkd1	198.948	11.1754	1.52225	7.34134	2.11459e-13	2.29548e-12
gene-ribc2	195.113	11.1477	1.50968	7.38415	1.53427e-13	1.68744e-12
gene-pimr185	191.602	11.1213	1.50867	7.37161	1.68586e-13	1.8432e-12
gene-LOC108191006	505.525	11.0815	1.46579	7.5601	4.02764e-14	4.72249e-13
gene-rsph10b	184.321	11.0651	1.60329	6.90145	5.14739e-12	4.85692e-11
gene-LOC110438381	182.757	11.053	1.51378	7.30163	2.84308e-13	3.04669e-12
gene-LOC110437747	182.413	11.05	1.60264	6.89489	5.39054e-12	5.08265e-11
gene-dnai1.1	181.975	11.0471	1.51172	7.3076	2.71966e-13	2.91926e-12
gene-spaca9-2	181.955	11.0464	1.58654	6.96256	3.34136e-12	3.22807e-11
gene-si:dkey-248f6.3	174.362	10.9855	1.51873	7.23335	4.71222e-13	4.96143e-12
gene-mlst8	163.446	10.8916	1.59999	6.80729	9.94569e-12	9.08974e-11
gene-LOC100150117-2	154.335	10.809	1.53375	7.04744	1.8224e-12	1.8092e-11
gene-cyp11c1	414.514	10.7949	1.45741	7.40691	1.29277e-13	1.43339e-12
gene-dnah6-2	1263.76	10.7887	1.78408	6.04718	1.474e-09	1.04198e-08
gene-si:ch211-155m12.5-2	150.26	10.7702	1.6398	6.56803	5.09846e-11	4.2875e-10
gene-ccdc83	403.207	10.7516	1.45744	7.37703	1.6186e-13	1.77491e-12
gene-ccdc151	147.371	10.7432	1.58591	6.77413	1.25161e-11	1.12797e-10
gene-LOC110440082	147.132	10.7406	1.53014	7.01938	2.22853e-12	2.19555e-11
gene-LOC100330990	144.107	10.7101	1.5332	6.98543	2.83975e-12	2.77034e-11
gene-fam183a-2	141.13	10.6804	1.52562	7.00071	2.5466e-12	2.49504e-11
gene-kif6	139.985	10.6683	1.53168	6.96509	3.28205e-12	3.17432e-11
gene-LOC565709	135.549	10.622	1.52739	6.95434	3.5422e-12	3.40559e-11
gene-si:dkeyp-80c12.8	134.357	10.6097	1.54933	6.84794	7.49236e-12	6.95056e-11
gene-si:ch73-66d24.2	361.428	10.5972	1.46018	7.25745	3.9445e-13	4.18201e-12
gene-ccdc166	132.782	10.5925	1.53249	6.91196	4.78012e-12	4.53098e-11
gene-LOC110437903	132.296	10.5873	1.54274	6.86268	6.75782e-12	6.303e-11
gene-LOC101886239	132.038	10.5847	1.57822	6.70672	1.99047e-11	1.7512e-10
gene-LOC110440054	354.378	10.5693	1.4723	7.17878	7.03356e-13	7.25224e-12
gene-nptx2a	699.133	10.5398	1.10055	9.57686	1.00044e-21	2.32816e-20
gene-pimr188-2	126.638	10.5245	1.60566	6.55461	5.57867e-11	4.66325e-10
gene-pimr186	342.765	10.517	1.4614	7.19649	6.17833e-13	6.41639e-12
gene-si:dkey-256e7.8	117.183	10.4125	1.59574	6.5252	6.79093e-11	5.62854e-10
gene-odf3b	116.791	10.4066	1.61645	6.43796	1.21093e-10	9.73438e-10
gene-LOC110440193	949.162	10.4026	0.888791	11.7042	1.21354e-31	5.49509e-30
gene-saxo2	310.365	10.3724	1.49812	6.92364	4.40184e-12	4.1947e-11
gene-LOC108191508	113.718	10.3682	1.61096	6.43603	1.2264e-10	9.84656e-10
gene-angptl5	112.431	10.3522	1.53945	6.72459	1.7609e-11	1.55822e-10
gene-ankar	2429.8	10.3501	0.609413	16.9838	1.08291e-64	2.57324e-62
gene-LOC110438462	111.515	10.3402	1.55184	6.66316	2.67995e-11	2.31764e-10
gene-cfap57	1797.28	10.3256	0.66819	15.453	7.19916e-54	9.76259e-52
gene-stpg1	295.853	10.3083	1.46524	7.03519	1.98995e-12	1.96799e-11
gene-spag16	291.608	10.2879	1.47405	6.97937	2.96512e-12	2.88938e-11
gene-dnah5l	22243.1	10.2789	0.378335	27.1688	1.51682e-162	3.92872e-158
gene-LOC108191007	284.765	10.2481	1.48397	6.90591	4.98822e-12	4.71704e-11
gene-igsf5b	104.312	10.2446	1.5788	6.48889	8.64728e-11	7.08552e-10
gene-LOC100150117	103.682	10.2352	1.54737	6.6146	3.72547e-11	3.17204e-10
gene-LOC100004744	278.421	10.2209	1.48275	6.89323	5.45389e-12	5.13677e-11
gene-izumo1	552.148	10.2162	1.09751	9.30856	1.29577e-20	2.79449e-19
gene-LOC100333749	101.621	10.2065	1.5469	6.59804	4.16631e-11	3.5323e-10
gene-gb:co360592-3	101.603	10.2062	3.00453	3.39695	0.000681426	0.00194916
gene-LOC110440110	275.701	10.2024	1.46643	6.9573	3.46862e-12	3.33856e-11
gene-klhl10a	269.559	10.1747	1.48124	6.86904	6.46338e-12	6.03925e-11
gene-LOC103910036	99.2357	10.172	1.55115	6.5577	5.46428e-11	4.57434e-10
gene-LOC110437965	97.8619	10.1522	1.55087	6.54613	5.90481e-11	4.92086e-10
gene-pimr124	261.133	10.1288	1.4977	6.7629	1.35261e-11	1.21309e-10
gene-dab1b	255.694	10.0985	1.50037	6.73064	1.68917e-11	1.50039e-10
gene-eno4	766.063	10.0981	0.888942	11.3597	6.6367e-30	2.73286e-28
gene-LOC108190615	93.9892	10.0944	1.80054	5.6063	2.06701e-08	1.25675e-07
gene-inhbab	92.691	10.0742	1.58893	6.34026	2.29384e-10	1.7847e-09
gene-pimr122	92.5763	10.0722	1.562	6.4483	1.13114e-10	9.12698e-10
gene-terb2	88.3019	10.004	1.56266	6.4019	1.5346e-10	1.21963e-09
gene-spag6	1188.2	9.99433	0.745082	13.4137	5.02532e-41	3.88539e-39
gene-daw1	1664.85	9.99043	0.617854	16.1696	8.26687e-59	1.41801e-56
gene-LOC108179558	236.66	9.98104	1.49563	6.67345	2.4985e-11	2.17087e-10
gene-oc90	235.639	9.9748	1.49555	6.66965	2.56408e-11	2.22273e-10
gene-LOC103911601	85.3626	9.95428	1.70423	5.84093	5.19087e-09	3.41241e-08
gene-prdm14	85.1532	9.95115	1.56673	6.35154	2.13171e-10	1.6701e-09
gene-dzip1l	461.784	9.94373	1.07756	9.22799	2.75754e-20	5.70927e-19
gene-pimr108	84.2758	9.93692	1.5919	6.24219	4.31476e-10	3.25631e-09
gene-dnaaf3	227.273	9.92976	1.5252	6.51047	7.49147e-11	6.18345e-10
gene-LOC108180288	82.978	9.91417	1.56601	6.33086	2.43806e-10	1.89236e-09
gene-LOC110438410	224.038	9.90714	1.48255	6.6825	2.34905e-11	2.04858e-10
gene-LOC108180740	81.8999	9.89533	1.56781	6.31157	2.76223e-10	2.13248e-09
gene-asb14a	81.6899	9.89143	1.56633	6.31502	2.70124e-10	2.08912e-09
gene-zte38	661.531	9.88637	0.893099	11.0697	1.7593e-28	6.53767e-27
gene-LOC100148951	220.403	9.88398	1.48248	6.66718	2.60768e-11	2.25892e-10
gene-fank1	1106.92	9.8778	0.753645	13.1067	3.01462e-39	2.06021e-37
gene-si:dkey-37m8.3	80.7454	9.87475	1.56761	6.29926	2.99073e-10	2.29997e-09
gene-LOC561346	80.5167	9.87114	1.60493	6.15051	7.72332e-10	5.66209e-09
gene-LOC103908992	80.2779	9.86634	1.56797	6.29242	3.12545e-10	2.39858e-09
gene-axdnd1	875.231	9.86142	0.859206	11.4774	1.71444e-30	7.35192e-29
gene-fam166b	648.651	9.8582	0.902157	10.9274	8.52913e-28	3.05551e-26
gene-LOC103911781	212.483	9.83304	1.56677	6.276	3.47387e-10	2.65732e-09
gene-zgc:162239-2	211.576	9.81972	1.47501	6.65738	2.78756e-11	2.40589e-10
gene-si:ch211-198b3.4	75.5837	9.77941	1.57429	6.21195	5.23316e-10	3.90955e-09
gene-LOC100536098	75.0686	9.76987	1.5857	6.16125	7.21733e-10	5.30616e-09
gene-LOC110437716	74.8677	9.765	1.6621	5.87509	4.22624e-09	2.80893e-08
gene-tekt2	74.7915	9.76365	1.61262	6.05452	1.40834e-09	9.99109e-09
gene-LOC101882029	199.583	9.74287	1.57734	6.17676	6.54315e-10	4.82695e-09
gene-insl3	2211.16	9.72207	0.721568	13.4735	2.23909e-41	1.78445e-39
gene-rangap1b	72.5301	9.7192	1.70214	5.70998	1.12992e-08	7.1172e-08
gene-LOC796282	71.9106	9.70801	1.60595	6.04504	1.49377e-09	1.05509e-08
gene-c5h9orf84	192.896	9.69172	1.5108	6.41496	1.40855e-10	1.12255e-09
gene-LOC101883422	193.659	9.69127	1.49916	6.46448	1.0165e-10	8.25341e-10
gene-tekt1	1162.68	9.68498	0.683034	14.1794	1.22952e-45	1.19721e-43
gene-morn5	69.9353	9.66709	1.58838	6.08611	1.15685e-09	8.30479e-09
gene-si:dkey-267j14.7	378.148	9.65423	1.08686	8.88269	6.52638e-19	1.19632e-17
gene-catip	556.914	9.63853	0.922401	10.4494	1.47456e-25	4.49855e-24
gene-ubxn10	186.597	9.63581	1.52471	6.31976	2.61972e-10	2.0291e-09
gene-cremb-3	67.7219	9.62077	1.58932	6.05337	1.41846e-09	1.00546e-08
gene-ccdc135	916.564	9.61427	0.716328	13.4216	4.51894e-41	3.52546e-39
gene-LOC110439490	359.448	9.57982	1.09715	8.73152	2.51278e-18	4.37978e-17
gene-LOC565832	65.3939	9.57048	1.59117	6.01474	1.80171e-09	1.25886e-08
gene-pax6a	65.3177	9.56922	1.60912	5.94687	2.73325e-09	1.86742e-08
gene-gpib	175.722	9.55651	1.48344	6.44211	1.17824e-10	9.48633e-10
gene-pimr188	63.9152	9.53781	1.60398	5.94636	2.74178e-09	1.87276e-08
gene-ccdc78-2	63.8007	9.5353	1.60992	5.92283	3.16454e-09	2.14455e-08
gene-LOC103910044	63.7717	9.53362	1.64168	5.80723	6.35135e-09	4.12504e-08
gene-LOC110439360	511.987	9.52493	0.92623	10.2835	8.35985e-25	2.41123e-23
gene-lhfpl5a	63.2663	9.52279	1.59547	5.96865	2.39227e-09	1.64749e-08
gene-si:ch211-202m22.1	172.249	9.52239	1.48623	6.40707	1.48345e-10	1.18006e-09
gene-iqub	173.554	9.52137	1.76387	5.39799	6.7391e-08	3.7929e-07
gene-pimr212	339.576	9.51341	1.08759	8.74723	2.18657e-18	3.84223e-17
gene-si:dkeyp-81f3.4	170.226	9.50528	1.48366	6.40665	1.48747e-10	1.18253e-09
gene-scrt2	61.6918	9.48587	1.62784	5.82727	5.634e-09	3.68826e-08
gene-si:dkey-202b22.6	1491.74	9.48359	0.598622	15.8424	1.58736e-56	2.46193e-54
gene-sema4e	664.969	9.467	0.827225	11.4443	2.5115e-30	1.06465e-28
gene-LOC108179232	60.7284	9.46366	1.60087	5.91159	3.38831e-09	2.28484e-08
gene-rec8b	816.041	9.45131	0.718837	13.148	1.74624e-39	1.21258e-37
gene-armc4	792.573	9.43051	0.974227	9.68	3.66729e-22	8.79504e-21
gene-pimr54	59.3639	9.43049	1.61889	5.82527	5.70205e-09	3.72951e-08
gene-zdhhc8a	158.909	9.39751	1.67531	5.60942	2.03008e-08	1.23517e-07
gene-smyd1a	157.65	9.39341	1.49949	6.26441	3.74233e-10	2.85089e-09
gene-LOC101883222	57.4372	9.38407	1.76379	5.32039	1.03545e-07	5.68687e-07
gene-hsf5	1398.14	9.37895	0.556914	16.8409	1.22264e-63	2.75371e-61
gene-mmp19	155.257	9.37785	1.49686	6.26501	3.72802e-10	2.84082e-09
gene-LOC101886505	57.1411	9.37638	1.63737	5.72647	1.02542e-08	6.48738e-08
gene-si:ch211-261c8.5	308.107	9.35517	1.11071	8.42269	3.6793e-17	5.78965e-16
gene-LOC110440076	56.3296	9.35444	1.72462	5.42407	5.82557e-08	3.3206e-07
gene-dnah6-3	2103.85	9.35179	0.575882	16.2391	2.6698e-59	4.73634e-57
gene-si:ch211-121a2.2	1543.11	9.34925	0.586397	15.9435	3.15913e-57	5.01992e-55
gene-LOC108192030	152.299	9.34263	1.53904	6.07042	1.27575e-09	9.11522e-09
gene-LOC103911582	55.6908	9.33903	1.61876	5.76925	7.96238e-09	5.10353e-08
gene-LOC100330151	151.592	9.33755	1.49304	6.25407	3.99901e-10	3.03216e-09
gene-si:dkey-86l18.8	1039.85	9.31917	0.626109	14.8843	4.17056e-50	4.8224e-48
gene-pimr122-3	149.139	9.30822	1.61556	5.76162	8.33122e-09	5.32544e-08
gene-LOC103908994	54.2788	9.30207	1.62789	5.7142	1.10223e-08	6.95124e-08
gene-si:dkey-69c1.1	53.6397	9.28539	1.72713	5.37619	7.60774e-08	4.25682e-07
gene-LOC110440061	53.5632	9.28287	1.6266	5.70692	1.15036e-08	7.23018e-08
gene-LOC100005689	53.5535	9.28211	1.62141	5.72471	1.03609e-08	6.55173e-08
gene-LOC100331743	53.5344	9.28138	1.63228	5.68615	1.29935e-08	8.09582e-08
gene-hepacam	53.277	9.27536	1.64649	5.63342	1.76666e-08	1.08048e-07
gene-LOC101886500	53.2484	9.2746	1.64905	5.62421	1.8636e-08	1.13655e-07
gene-LOC110440002	873.994	9.2738	0.673047	13.7788	3.41809e-43	2.91223e-41
gene-lrguk	577.498	9.26608	0.793485	11.6777	1.6572e-31	7.47792e-30
gene-LOC560496	430.055	9.24932	0.920673	10.0463	9.54204e-24	2.57984e-22
gene-prph	52.3037	9.24825	1.62249	5.70004	1.1978e-08	7.5101e-08
gene-LOC101885332	52.3037	9.24825	1.62249	5.70004	1.1978e-08	7.5101e-08
gene-krt17	50.9682	9.21168	1.71326	5.37669	7.58692e-08	4.247e-07
gene-pimr132	276.681	9.21032	1.12127	8.21421	2.13563e-16	3.15006e-15
gene-tuba7l	5396.35	9.20399	0.353028	26.0716	7.66326e-150	6.61621e-146
gene-LOC103910311	50.7008	9.20338	1.6276	5.65455	1.56252e-08	9.63079e-08
gene-LOC103908855	50.4433	9.19629	1.63599	5.62124	1.89588e-08	1.15514e-07
gene-adgrf3a-2	49.661	9.17396	1.65718	5.53587	3.09682e-08	1.82921e-07
gene-prss60.3	49.6132	9.1724	1.64144	5.58802	2.29673e-08	1.38472e-07
gene-ttc34	270.973	9.16586	1.14333	8.01681	1.08525e-15	1.48254e-14
gene-nme8	402.789	9.16361	0.904406	10.1322	3.97632e-24	1.09798e-22
gene-si:dkey-19b23.12-2	134.313	9.16026	1.53459	5.9692	2.38413e-09	1.64276e-08
gene-ttll2	267.358	9.16024	1.11559	8.21112	2.19143e-16	3.22869e-15
gene-LOC103911894	399.125	9.15061	0.902496	10.1392	3.70039e-24	1.02397e-22
gene-si:dkey-217f16.5	48.7447	9.14584	1.69615	5.39211	6.9637e-08	3.91251e-07
gene-LOC797378-2	48.6306	9.14387	1.68888	5.41417	6.15722e-08	3.49503e-07
gene-LOC110437926	507.467	9.11997	1.73562	5.2546	1.48347e-07	7.94198e-07
gene-jupa	47.8479	9.11927	1.65916	5.49631	3.87825e-08	2.25985e-07
gene-si:ch211-151m7.3	47.8384	9.11924	1.64176	5.55456	2.78316e-08	1.65678e-07
gene-dnajb13	521.131	9.11764	0.794467	11.4764	1.73288e-30	7.41875e-29
gene-LOC562898-2	47.7145	9.11592	1.63979	5.55921	2.71002e-08	1.61659e-07
gene-LOC110437949	47.4282	9.10669	1.64919	5.52193	3.35302e-08	1.97155e-07
gene-si:ch73-222h13.1	1027.02	9.10126	0.604055	15.0669	2.67228e-51	3.29594e-49
gene-sh3gl2b	47.1231	9.09825	1.66153	5.47582	4.35495e-08	2.5178e-07
gene-morn3	47.0084	9.09403	1.64318	5.53441	3.12275e-08	1.84242e-07
gene-LOC101884206	46.9127	9.09044	1.80239	5.04356	4.56961e-07	2.27832e-06
gene-ccdc78-3	46.5697	9.08124	1.66684	5.44817	5.08901e-08	2.92198e-07
gene-LOC103908726	46.4455	9.077	1.64352	5.52289	3.3347e-08	1.96122e-07
gene-LOC110439345	46.0258	9.06407	1.65131	5.48903	4.04148e-08	2.34652e-07
gene-LOC108179511	45.8541	9.05885	1.66404	5.4439	5.21268e-08	2.98703e-07
gene-LOC110439055	45.8541	9.05885	1.66404	5.4439	5.21268e-08	2.98703e-07
gene-LOC103909593	45.8446	9.05874	1.69313	5.35029	8.78127e-08	4.86614e-07
gene-lrrc51	249.003	9.05791	1.13634	7.97109	1.57275e-15	2.11724e-14
gene-taar20r	45.4718	9.04553	2.04014	4.43377	9.2599e-06	3.75121e-05
gene-bco2b	122.76	9.03882	1.50382	6.01057	1.84869e-09	1.2903e-08
gene-cdc14aa	363.443	9.03171	0.944606	9.56135	1.16232e-21	2.69038e-20
gene-LOC108180169	121.138	9.02086	1.5593	5.78521	7.24221e-09	4.66386e-08
gene-pimr131	44.089	9.00217	1.66702	5.40017	6.65764e-08	3.75358e-07
gene-ankrd31	43.5068	8.98216	1.66676	5.38898	7.0857e-08	3.97933e-07
gene-ribc1	237.542	8.98083	1.09964	8.16706	3.16003e-16	4.59304e-15
gene-si:ch211-122l14.7	116.921	8.96855	1.50488	5.95965	2.52772e-09	1.73432e-08
gene-mkxb	117.407	8.96743	1.50441	5.96074	2.51092e-09	1.7237e-08
gene-si:dkey-145c18.2	233.87	8.96715	1.09716	8.17307	3.00652e-16	4.37482e-15
gene-LOC103910365	116.396	8.96206	1.51528	5.91446	3.32974e-09	2.24886e-08
gene-tb	42.5337	8.94973	1.66099	5.3882	7.11677e-08	3.99504e-07
gene-twf2	42.4287	8.94598	1.6698	5.35752	8.43706e-08	4.6965e-07
gene-zdhhc4	42.2568	8.93968	1.75056	5.10674	3.27763e-07	1.6672e-06
gene-drc1	569.893	8.93805	0.729801	12.2472	1.73831e-34	9.22623e-33
gene-casc1	571.636	8.93774	0.781348	11.4389	2.67346e-30	1.12961e-28
gene-ccdc169	225.217	8.92165	1.1065	8.06294	7.44839e-16	1.03554e-14
gene-irf4a	113.628	8.91992	1.50797	5.91518	3.31508e-09	2.24071e-08
gene-atp2a1	793.608	8.91353	0.642007	13.8839	7.93608e-44	7.11254e-42
gene-stk33	41.1023	8.89965	1.79321	4.96296	6.94254e-07	3.3611e-06
gene-pimr136	112.026	8.89936	1.50859	5.89914	3.6541e-09	2.44877e-08
gene-LOC103908853	40.9689	8.89534	1.68697	5.27297	1.34236e-07	7.24192e-07
gene-nsfa	111.663	8.89475	1.50786	5.89892	3.65885e-09	2.45131e-08
gene-LOC100334422	40.8069	8.89047	1.67499	5.30779	1.10964e-07	6.06347e-07
gene-LOC101885174	109.373	8.86492	1.51253	5.86097	4.60158e-09	3.04255e-08
gene-ttc25	1082.93	8.86367	0.549309	16.136	1.42416e-58	2.39528e-56
gene-si:ch211-222n4.2	108.753	8.85595	1.51776	5.83489	5.3825e-09	3.53389e-08
gene-hoxd3a	39.8144	8.85395	1.71258	5.16994	2.34168e-07	1.21913e-06
gene-LOC100535061	534.045	8.85295	0.855109	10.353	4.05516e-25	1.20312e-23
gene-si:ch211-241d24.1	39.6905	8.84985	1.67658	5.27851	1.3024e-07	7.03956e-07
gene-fbxo36b	215.504	8.84905	1.09936	8.0493	8.32672e-16	1.15579e-14
gene-pimr113	39.5379	8.84485	1.6794	5.26666	1.38927e-07	7.4794e-07
gene-mdh1b	633.614	8.84114	0.722267	12.2408	1.88132e-34	9.92426e-33
gene-si:dkey-73n10.8	39.2705	8.83394	1.75674	5.0286	4.94077e-07	2.45249e-06
gene-si:ch73-174h16.5	1383.84	8.83193	0.562207	15.7094	1.30402e-55	1.94111e-53
gene-dnai1.2	422.842	8.827	0.800836	11.0222	2.98561e-28	1.08916e-26
gene-gabrr2b	209.113	8.81478	1.10893	7.94891	1.88166e-15	2.51351e-14
gene-LOC101884685	38.4983	8.80699	1.9728	4.4642	8.03675e-06	3.29732e-05
gene-cavin4b	38.4882	8.80507	1.71964	5.12028	3.0508e-07	1.56102e-06
gene-kcnj1a.1	103.563	8.78563	1.52442	5.76328	8.24947e-09	5.27579e-08
gene-hormad1	1853.84	8.78525	0.441918	19.8798	6.08412e-88	4.04064e-85
gene-fam228a-2	103.583	8.78231	1.61751	5.42954	5.65001e-08	3.22408e-07
gene-LOC108182805	37.8397	8.78194	1.73378	5.0652	4.07962e-07	2.04859e-06
gene-LOC103911146	102.314	8.77597	1.52824	5.74252	9.32759e-09	5.93014e-08
gene-taar16f	202.651	8.75895	1.18952	7.3634	1.79278e-13	1.95433e-12
gene-LOC108191509	199.637	8.75407	1.1861	7.38057	1.57618e-13	1.73059e-12
gene-LOC110437789	36.9045	8.74472	1.69907	5.14677	2.65005e-07	1.37031e-06
gene-LOC100002266	36.8095	8.74223	2.08162	4.19971	2.67252e-05	0.000100045
gene-pimr47-3	36.79	8.74039	1.69215	5.16524	2.40128e-07	1.2479e-06
gene-clasp1b	36.7993	8.74005	1.89188	4.61978	3.84149e-06	1.66274e-05
gene-LOC110440060	100.347	8.7366	1.58343	5.5175	3.43857e-08	2.0191e-07
gene-rcan3-2	36.5228	8.72955	1.71636	5.08609	3.6552e-07	1.84728e-06
gene-LOC110440207	198.082	8.72691	1.10571	7.89255	2.96072e-15	3.87692e-14
gene-zgc:162324-3	198.119	8.72666	1.14107	7.64779	2.04455e-14	2.47689e-13
gene-LOC101882166	36.3793	8.72372	2.28747	3.8137	0.000136901	0.000450268
gene-si:ch211-10a23.2	199.016	8.72088	1.13787	7.66423	1.79901e-14	2.18761e-13
gene-rsph14	291.99	8.70532	0.91975	9.46487	2.93915e-21	6.63126e-20
gene-LOC100330229	97.076	8.69996	1.52035	5.72234	1.05065e-08	6.64056e-08
gene-pms2	35.5877	8.692	1.73961	4.99651	5.83757e-07	2.86579e-06
gene-tas1r3	35.4924	8.68856	1.70105	5.10778	3.25971e-07	1.65874e-06
gene-LOC103909227	35.4541	8.68647	1.76358	4.92547	8.41574e-07	4.01873e-06
gene-arf3a	35.4447	8.68634	1.72063	5.04835	4.45631e-07	2.22609e-06
gene-es1	35.3014	8.68009	1.85608	4.67658	2.91695e-06	1.2849e-05
gene-tex11	483.374	8.67907	0.76989	11.2731	1.78124e-29	7.11973e-28
gene-spaca6	385.295	8.6774	0.836199	10.3772	3.14903e-25	9.39666e-24
gene-tal2	35.0916	8.67172	1.74857	4.95931	7.07444e-07	3.42048e-06
gene-pimr133	285.93	8.66662	0.932284	9.29612	1.45664e-20	3.12063e-19
gene-LOC108191531	34.6912	8.65666	1.76415	4.90698	9.24903e-07	4.38592e-06
gene-ppil6	188.636	8.65552	1.16102	7.45509	8.98091e-14	1.01137e-12
gene-lcat	95.0436	8.6528	1.74137	4.96897	6.7309e-07	3.26903e-06
gene-LOC110439253	34.6047	8.65145	2.17184	3.98347	6.79153e-05	0.000235517
gene-armc3	842.737	8.64734	0.602555	14.3511	1.04816e-46	1.07306e-44
gene-taar18g	93.7257	8.63886	1.56044	5.53617	3.09162e-08	1.82655e-07
gene-cfap77	189.992	8.63696	1.30616	6.61247	3.77958e-11	3.21389e-10
gene-pimr134	463.022	8.62635	0.733814	11.7555	6.61724e-32	3.04428e-30
gene-slco5a1b	92.1527	8.62504	1.5409	5.59741	2.17572e-08	1.31697e-07
gene-klhl10b.2-2	33.8891	8.62138	2.29349	3.75907	0.000170544	0.000550367
gene-LOC108191530	33.8422	8.6211	1.94571	4.43082	9.38759e-06	3.79919e-05
gene-LOC110438336	92.2861	8.61374	1.6561	5.20123	1.97977e-07	1.04223e-06
gene-si:ch211-198o12.4	273.805	8.61235	0.919634	9.36498	7.60674e-21	1.66545e-19
gene-LOC108179646	33.6602	8.61145	2.09093	4.11847	3.81389e-05	0.000139034
gene-LOC110438404	33.6225	8.61131	1.73487	4.96366	6.91779e-07	3.35162e-06
gene-si:dkey-14d8.21	33.4793	8.60418	1.72145	4.99821	5.7866e-07	2.84292e-06
gene-pimr140	33.4506	8.60299	1.7192	5.00407	5.61338e-07	2.76352e-06
gene-pimr168	33.4222	8.6029	1.76969	4.86125	1.16645e-06	5.4594e-06
gene-pimr48-3	33.3839	8.60063	1.7122	5.02315	5.08296e-07	2.51921e-06
gene-cplx3b	33.174	8.59103	1.72014	4.99438	5.90266e-07	2.89554e-06
gene-cfap99	527.89	8.56731	0.694933	12.3283	6.38105e-35	3.4649e-33
gene-si:dkey-206f10.1	520.818	8.5555	0.785971	10.8853	1.35508e-27	4.78174e-26
gene-si:dkey-100n19.2-2	87.649	8.55537	1.65117	5.18141	2.20214e-07	1.15018e-06
gene-taar20v	32.3344	8.55456	1.72025	4.97287	6.59685e-07	3.20813e-06
gene-ccdc88aa	261.708	8.5473	0.922183	9.26855	1.88696e-20	3.96707e-19
gene-LOC108183630	32.191	8.547	2.04238	4.18483	2.85386e-05	0.00010628
gene-si:dkey-70b23.2	261.468	8.53797	0.920637	9.27398	1.79319e-20	3.79767e-19
gene-LOC566055	259.131	8.53273	0.92047	9.26998	1.86183e-20	3.92059e-19
gene-b3gat1a	86.4187	8.53206	1.53169	5.57036	2.54212e-08	1.52274e-07
gene-LOC110438663-2	31.7905	8.52968	1.72612	4.94153	7.75108e-07	3.72055e-06
gene-LOC101885031	31.7238	8.5272	1.73028	4.92823	8.2978e-07	3.9668e-06
gene-dnah6	459.202	8.52585	1.7443	4.88783	1.01953e-06	4.80737e-06
gene-si:ch211-140l13.3	257.653	8.52469	0.921963	9.24623	2.32541e-20	4.84948e-19
gene-LOC101882973	31.6666	8.52469	1.73578	4.91116	9.05405e-07	4.2974e-06
gene-tmem74b	31.6188	8.52216	1.72396	4.94335	7.67917e-07	3.6874e-06
gene-rdh8b	85.5693	8.51868	1.57596	5.40538	6.46714e-08	3.65334e-07
gene-adgrg11	31.5423	8.51761	1.88801	4.51142	6.43942e-06	2.68622e-05
gene-LOC103909570	31.4947	8.51585	1.75128	4.86263	1.15834e-06	5.42338e-06
gene-sycp1-2	3031.41	8.51573	0.405112	21.0207	4.24292e-98	4.77809e-95
gene-LOC103909239	31.3992	8.51109	1.84522	4.61251	3.97835e-06	1.7171e-05
gene-scn1ba-2	31.3518	8.51066	1.7883	4.75907	1.94483e-06	8.80495e-06
gene-LOC108190101	31.3327	8.5095	1.747	4.87092	1.11082e-06	5.21503e-06
gene-ccdc175	510.477	8.50682	0.681632	12.4801	9.5897e-36	5.4952e-34
gene-pimr172	31.1705	8.50187	1.73757	4.89296	9.93308e-07	4.69569e-06
gene-zgc:158260	31.0653	8.4957	1.82988	4.64277	3.43761e-06	1.49769e-05
gene-msrb1b	30.9794	8.49176	1.80901	4.69415	2.6772e-06	1.18757e-05
gene-LOC110438333-2	30.8652	8.48774	1.74473	4.86477	1.14587e-06	5.37376e-06
gene-LOC100330159	671.012	8.48492	0.662224	12.8128	1.3909e-37	8.8568e-36
gene-si:ch211-181d7.1	30.8172	8.48412	1.83726	4.6178	3.87824e-06	1.67781e-05
gene-LOC110440059	84.1177	8.47869	1.64671	5.14887	2.62058e-07	1.35588e-06
gene-trpc4a	165.51	8.47788	1.12519	7.53462	4.8976e-14	5.68592e-13
gene-pimr129	503.546	8.47164	0.712315	11.8931	1.28531e-32	6.0529e-31
gene-gpx3	82.8121	8.47064	1.54591	5.47938	4.26829e-08	2.47101e-07
gene-LOC798514	30.4262	8.46695	1.7408	4.86383	1.15134e-06	5.39453e-06
gene-LOC110440058	83.1839	8.46337	1.6604	5.0972	3.44711e-07	1.74587e-06
gene-LOC101883154	82.0969	8.45908	1.54977	5.45829	4.80729e-08	2.76697e-07
gene-LOC101883236	82.5439	8.45592	1.54354	5.47828	4.29483e-08	2.48526e-07
gene-ropn1l-2	322.711	8.45107	0.875261	9.65548	4.65957e-22	1.10621e-20
gene-ak7a	823.326	8.44934	0.559429	15.1035	1.53536e-51	1.9119e-49
gene-rps6kl1-2	30.0158	8.4461	1.84482	4.57827	4.68835e-06	1.99725e-05
gene-LOC100149647-3	29.8153	8.43639	2.11443	3.98991	6.60974e-05	0.000229828
gene-mlf1	398.822	8.42667	0.796101	10.5849	3.50063e-26	1.1218e-24
gene-si:ch211-198e20.10	80.6353	8.41728	1.6519	5.09552	3.4778e-07	1.76106e-06
gene-LOC110437928	79.0911	8.40447	1.56116	5.38348	7.30597e-08	4.09859e-07
gene-LOC103910510	29.0997	8.40139	2.20868	3.80381	0.000142489	0.000467521
gene-march9	29.0332	8.39855	1.7618	4.76702	1.8697e-06	8.49149e-06
gene-gb:ee300746	157.447	8.39477	1.1161	7.52154	5.41338e-14	6.25946e-13
gene-tex2l	28.9376	8.39332	1.85282	4.53003	5.89749e-06	2.4753e-05
gene-LOC110438903	28.8328	8.38892	1.74889	4.79672	1.61287e-06	7.3977e-06
gene-pimr213	233.093	8.37115	0.931105	8.99056	2.45974e-19	4.70529e-18
gene-LOC101882203	28.3748	8.36526	1.78827	4.67786	2.89886e-06	1.27801e-05
gene-si:ch1073-15f12.3	76.9064	8.36376	1.53779	5.43883	5.36318e-08	3.06784e-07
gene-LOC103910301	28.2509	8.35961	1.75379	4.76659	1.87374e-06	8.50835e-06
gene-LOC101886518	77.1627	8.35774	1.5566	5.36923	7.9072e-08	4.41961e-07
gene-slc34a1a	615.895	8.35703	0.604491	13.8249	1.80346e-43	1.57809e-41
gene-si:ch211-103e16.5	154.125	8.35173	1.12761	7.40656	1.29615e-13	1.43652e-12
gene-LOC100538266	28.0409	8.34828	1.78014	4.68967	2.73641e-06	1.21176e-05
gene-st8sia5	76.6094	8.34735	1.55608	5.36433	8.12486e-08	4.53441e-07
gene-smc1b	3543.07	8.34669	0.364088	22.9249	2.6213e-116	5.22264e-113
gene-si:ch211-214c7.5	228.533	8.34273	0.935763	8.91543	4.85907e-19	9.02186e-18
gene-LOC101882015	27.9264	8.34257	1.76693	4.7215	2.34116e-06	1.04838e-05
gene-LOC100332354	75.6758	8.34095	1.54507	5.39844	6.72221e-08	3.78587e-07
gene-si:dkey-27d5.11	27.8692	8.33971	1.76265	4.73134	2.23044e-06	1.00105e-05
gene-LOC100330916-2	27.8595	8.33854	1.86139	4.47975	7.47315e-06	3.07926e-05
gene-LOC108183855	75.3989	8.33508	1.54441	5.39692	6.77962e-08	3.81323e-07
gene-gpr31	27.6211	8.32679	1.76632	4.7142	2.42668e-06	1.08424e-05
gene-abhd2b-2	27.6114	8.32562	1.86998	4.45225	8.49753e-06	3.46551e-05
gene-LOC101884488	27.5925	8.32535	1.76457	4.71807	2.3809e-06	1.06507e-05
gene-LOC110437966	27.5544	8.32394	1.76899	4.70548	2.53266e-06	1.12736e-05
gene-LOC100537890	74.6065	8.32302	1.6825	4.94682	7.5434e-07	3.62758e-06
gene-LOC110438874	27.4875	8.31956	1.78218	4.6682	3.03847e-06	1.33457e-05
gene-LOC564671	75.1971	8.31824	1.60361	5.18721	2.13469e-07	1.11766e-06
gene-lrriq1	150.367	8.31244	1.16514	7.1343	9.72832e-13	9.92412e-12
gene-LOC110439017	27.3065	8.31161	1.98755	4.18184	2.89162e-05	0.000107624
gene-LOC101883590	27.2584	8.30696	1.93939	4.28328	1.84155e-05	7.10427e-05
gene-en2a-2	27.1917	8.30364	1.83157	4.53362	5.79826e-06	2.43681e-05
gene-si:ch1073-75f15.2	27.1157	8.30149	1.95935	4.23686	2.26669e-05	8.5949e-05
gene-frrs1l	27.1155	8.30062	1.76781	4.69542	2.66058e-06	1.1808e-05
gene-prss60.3-2	27.0867	8.29792	1.87909	4.41592	1.0058e-05	4.04837e-05
gene-LOC103912066	73.395	8.29765	1.61591	5.13496	2.82207e-07	1.45288e-06
gene-LOC103911387	27.0105	8.2947	1.76785	4.69196	2.70596e-06	1.1993e-05
gene-si:dkey-1h4.4	73.0804	8.28998	1.54878	5.3526	8.67009e-08	4.81381e-07
gene-ccdc113	587.587	8.28899	0.602495	13.7578	4.5738e-43	3.87144e-41
gene-msh5	581.852	8.27406	0.613	13.4976	1.61473e-41	1.30271e-39
gene-c3b.1	145.863	8.27058	1.14436	7.22723	4.92928e-13	5.16896e-12
gene-pimr50	26.5333	8.26815	1.87956	4.39899	1.08758e-05	4.34714e-05
gene-spa17	144.176	8.26759	1.13221	7.30216	2.83186e-13	3.03593e-12
gene-si:ch211-163l21.10-2	71.7449	8.26443	1.56174	5.29181	1.21109e-07	6.5755e-07
gene-LOC561283	287.568	8.26321	0.811831	10.1785	2.47383e-24	6.92698e-23
gene-efhc2	2240.72	8.26043	0.524176	15.7589	5.96599e-56	8.98401e-54
gene-stx11b.1-2	26.3618	8.26038	1.80292	4.58167	4.61269e-06	1.96923e-05
gene-olfml1	26.3143	8.25822	1.98859	4.15281	3.28422e-05	0.000120951
gene-LOC101885085	26.1134	8.24516	2.28142	3.61405	0.000301448	0.000923018
gene-krt1-19d	71.6871	8.24423	1.7558	4.69544	2.66036e-06	1.1808e-05
gene-si:dkey-21o22.2	26.0279	8.2421	1.82189	4.52393	6.07022e-06	2.54368e-05
gene-s100z	25.9801	8.23909	1.78779	4.60853	4.05521e-06	1.74736e-05
gene-ccdc103	1329.35	8.23903	0.521977	15.7843	3.99304e-56	6.04817e-54
gene-si:dkey-23f9.9	25.9038	8.23447	1.77918	4.62822	3.68814e-06	1.60091e-05
gene-LOC103908984	140.75	8.23164	1.17583	7.0007	2.54696e-12	2.49504e-11
gene-LOC108191731	25.7609	8.22757	2.02076	4.07152	4.6707e-05	0.000167209
gene-LOC108180207	559.432	8.22244	0.613693	13.3983	6.18662e-41	4.76904e-39
gene-LOC101885777	25.5985	8.21745	1.78326	4.60811	4.06343e-06	1.74974e-05
gene-LOC100149641	25.4268	8.2081	1.79832	4.56431	5.01147e-06	2.12581e-05
gene-taar20i	25.3883	8.20441	2.12355	3.86354	0.000111755	0.000373879
gene-LOC793479	67.8893	8.196	2.18026	3.75919	0.000170463	0.000550178
gene-gpr151	25.1882	8.1939	1.78953	4.5788	4.67648e-06	1.99252e-05
gene-LOC100000228	25.1406	8.19221	1.86223	4.39914	1.08682e-05	4.34536e-05
gene-LOC101885742	25.1023	8.18916	1.78892	4.57771	4.70098e-06	2.00164e-05
gene-onecutl	136.418	8.18663	1.15345	7.09749	1.27039e-12	1.28333e-11
gene-pimr46	25.0451	8.18599	1.79109	4.5704	4.86798e-06	2.06799e-05
gene-pimr126	68.4807	8.18584	1.5525	5.27267	1.3445e-07	7.25027e-07
gene-si:dkey-265c15.9-2	24.9117	8.17919	1.94858	4.19751	2.69866e-05	0.000100892
gene-pih1d2	406.945	8.17691	0.811889	10.0715	7.38773e-24	2.00576e-22
gene-si:dkey-7f3.9	67.5562	8.17645	1.55675	5.25225	1.50251e-07	8.04059e-07
gene-gdnfb	24.8353	8.17464	1.88122	4.3454	1.39022e-05	5.46901e-05
gene-pimr53	24.8351	8.17318	1.81113	4.51275	6.39938e-06	2.67124e-05
gene-pimr197	410.152	8.16926	0.764384	10.6874	1.16624e-26	3.8431e-25
gene-nkd3	66.9651	8.16714	1.64156	4.97523	6.51709e-07	3.17334e-06
gene-LOC110437723	24.6447	8.16343	2.40963	3.38783	0.000704473	0.00200773
gene-LOC103908682	24.5963	8.15902	2.63324	3.09847	0.00194522	0.00503279
gene-LOC103911188	24.5488	8.15588	1.96601	4.14845	3.34731e-05	0.000123082
gene-si:dkey-39a18.1	24.4057	8.14753	1.91073	4.26409	2.00719e-05	7.69512e-05
gene-LOC103911092-3	24.3009	8.14239	1.79945	4.52492	6.0418e-06	2.53341e-05
gene-h1f0	5326.93	8.1411	0.543619	14.9757	1.05775e-50	1.26837e-48
gene-si:ch211-286b4.4	728.361	8.1408	0.544205	14.9591	1.35944e-50	1.61517e-48
gene-LOC101882297	132.735	8.13421	1.14201	7.12269	1.05839e-12	1.07461e-11
gene-taar20c1	24.1479	8.13219	2.25587	3.60491	0.000312267	0.000953101
gene-LOC101886755	65.9714	8.13164	1.55425	5.23188	1.67796e-07	8.90593e-07
gene-tctex1d1	523.205	8.12585	0.60332	13.4686	2.39501e-41	1.90286e-39
gene-LOC110440025	23.9956	8.12425	1.80505	4.50084	6.76865e-06	2.81043e-05
gene-LOC101883914	23.9668	8.12128	1.95495	4.15422	3.264e-05	0.000120257
gene-LOC108180171	23.8811	8.1176	1.81673	4.46826	7.88602e-06	3.2401e-05
gene-LOC103908684	23.8811	8.1176	1.81673	4.46826	7.88602e-06	3.2401e-05
gene-LOC103910988	23.8241	8.11479	2.17237	3.73546	0.000187372	0.000599523
gene-LOC108191559-2	23.7761	8.1109	1.8066	4.48959	7.13607e-06	2.95447e-05
gene-myo1ha	64.8743	8.10662	1.58148	5.12598	2.95993e-07	1.51752e-06
gene-lrtm2b	23.6903	8.10587	1.81217	4.47303	7.71193e-06	3.17209e-05
gene-LOC110439185	23.6234	8.10082	1.84822	4.38304	1.17032e-05	4.65273e-05
gene-atp5ib	23.5952	8.10051	2.6229	3.08838	0.00201248	0.00519007
gene-dnali1	516.46	8.09956	0.651308	12.4358	1.66987e-35	9.36176e-34
gene-ttc29	23.4805	8.09379	1.92668	4.2009	2.65853e-05	9.96073e-05
gene-si:dkey-26i13.8	639.369	8.09288	0.551966	14.6619	1.13048e-48	1.22512e-46
gene-prf1.3	23.4612	8.09073	1.87713	4.31016	1.63133e-05	6.34144e-05
gene-kcnk17-2	23.4612	8.09073	1.87713	4.31016	1.63133e-05	6.34144e-05
gene-kif6-2	63.5393	8.08829	1.58746	5.09511	3.48545e-07	1.76356e-06
gene-LOC110439129	254.242	8.08491	0.818588	9.87666	5.25573e-23	1.33985e-21
gene-si:ch211-126g16.8	23.3278	8.08385	1.82929	4.41912	9.91038e-06	3.9964e-05
gene-wdr66	371.832	8.08184	0.99477	8.12433	4.49835e-16	6.41938e-15
gene-wdr95	1228.43	8.08057	0.645157	12.525	5.45149e-36	3.20179e-34
gene-ttll3	571.839	8.07996	0.616208	13.1124	2.79669e-39	1.91633e-37
gene-si:ch211-156l18.6-3	23.2036	8.07525	1.82639	4.42142	9.80564e-06	3.95663e-05
gene-LOC100534675	23.0319	8.06492	1.81693	4.43876	9.04801e-06	3.67209e-05
gene-LOC110440022	23.0319	8.06492	1.81693	4.43876	9.04801e-06	3.67209e-05
gene-LOC100537706	62.7943	8.05993	1.56076	5.16411	2.41589e-07	1.25499e-06
gene-LOC101884662	22.9556	8.05971	1.83212	4.39911	1.08697e-05	4.34536e-05
gene-taar20b	22.9267	8.05723	2.15313	3.7421	0.00018249	0.000584769
gene-LOC110440139	124.607	8.05606	1.13096	7.12321	1.05442e-12	1.071e-11
gene-fgf17	22.8506	8.05279	1.86484	4.31822	1.57295e-05	6.13571e-05
gene-LOC108180020	22.7935	8.05088	1.90651	4.22284	2.41243e-05	9.10718e-05
gene-nlrc3	22.7839	8.04927	1.82079	4.42076	9.83557e-06	3.96808e-05
gene-LOC100149041	22.7555	8.04865	2.04459	3.93655	8.26604e-05	0.000282713
gene-pcloa	123.995	8.04743	1.26199	6.37678	1.80846e-10	1.42504e-09
gene-LOC110438322	622.859	8.04033	0.615129	13.071	4.8254e-39	3.25476e-37
gene-fam20cb	22.5739	8.03523	1.86623	4.30559	1.66543e-05	6.46141e-05
gene-LOC110438331	427.047	8.03329	0.646072	12.434	1.70766e-35	9.55291e-34
gene-si:dkey-249p7.4	22.5169	8.03328	1.91806	4.18824	2.8113e-05	0.00010474
gene-LOC110437749	244.73	8.0297	0.823339	9.75261	1.79778e-22	4.38872e-21
gene-LOC110438333	22.345	8.021	1.83186	4.37861	1.19437e-05	4.74249e-05
gene-LOC101886834	22.2877	8.01744	1.82918	4.38307	1.17019e-05	4.65273e-05
gene-LOC108180238	22.1543	8.00997	1.968	4.0701	4.69936e-05	0.000168026
gene-LOC103910868	22.1636	8.00859	1.90741	4.19866	2.68495e-05	0.000100423
gene-LOC103909759	22.0971	8.00627	1.99687	4.00942	6.08684e-05	0.00021301
gene-LOC100535263	60.4377	8.00412	1.57588	5.07914	3.79144e-07	1.91241e-06
gene-pimr49	121.438	8.0033	1.15646	6.92053	4.49955e-12	4.28152e-11
gene-agbl2	891.394	7.99891	2.21999	3.60313	0.000314404	0.00095906
gene-lrrc23	836.041	7.99732	0.483559	16.5385	1.93938e-61	3.92437e-59
gene-si:ch211-106n13.3-3	121.028	7.99689	1.17725	6.79285	1.09942e-11	9.99507e-11
gene-LOC100002327	21.9538	7.99584	1.83362	4.36069	1.29653e-05	5.12301e-05
gene-si:ch211-163l21.10	120.293	7.99057	1.14828	6.95871	3.43404e-12	3.30773e-11
gene-sept8b	118.654	7.98544	1.15581	6.90896	4.88235e-12	4.62537e-11
gene-LOC101884649	21.7154	7.98104	1.94387	4.10575	4.03009e-05	0.000146011
gene-si:dkey-34o23.3	351.64	7.98025	0.703242	11.3478	7.60551e-30	3.1071e-28
gene-pimr147-2	21.6679	7.9778	2.42984	3.28326	0.00102613	0.00282262
gene-LOC101886807	21.5719	7.96932	2.18282	3.65092	0.000261298	0.000811204
gene-si:ch211-260p9.3	21.5435	7.96833	1.84368	4.32198	1.54634e-05	6.04006e-05
gene-LOC108190369	58.4352	7.96827	1.59002	5.01143	5.40275e-07	2.66597e-06
gene-LOC110438898	21.5246	7.96823	1.92184	4.14615	3.38116e-05	0.000124185
gene-LOC100006699	175.247	7.96726	0.940212	8.47389	2.37328e-17	3.79915e-16
gene-c18h15orf65	21.4579	7.96397	2.08733	3.81538	0.000135974	0.000447769
gene-LOC101884880	21.3815	7.95876	1.98458	4.01029	6.0643e-05	0.000212259
gene-LOC110439429	58.0058	7.95683	1.57273	5.05926	4.20897e-07	2.10864e-06
gene-noxo1b	21.343	7.95393	2.02901	3.92011	8.85091e-05	0.000301433
gene-trpc2a	21.3335	7.95355	1.91105	4.16188	3.15645e-05	0.000116676
gene-LOC101886539	21.2001	7.94599	1.87262	4.24324	2.20315e-05	8.37694e-05
gene-LOC103909265	21.2191	7.94599	1.8811	4.22411	2.39885e-05	9.06042e-05
gene-LOC101885472	21.1713	7.94241	1.9516	4.0697	4.70737e-05	0.000168266
gene-si:dkey-42p14.3	234.651	7.94094	0.905586	8.76884	1.80514e-18	3.18711e-17
gene-LOC108185367	21.1143	7.94031	1.89531	4.18944	2.7964e-05	0.000104245
gene-tcte1	536.397	7.93744	1.92925	4.11426	3.88427e-05	0.000141341
gene-msrb2	21.076	7.93654	1.85747	4.27276	1.93071e-05	7.42388e-05
gene-LOC110438801-2	21.0379	7.93469	1.85874	4.26885	1.96485e-05	7.54172e-05
gene-si:ch73-52f15.5	57.5659	7.93333	1.58268	5.0126	5.37003e-07	2.65083e-06
gene-rsph3	281.261	7.93168	0.804146	9.86348	5.99344e-23	1.51894e-21
gene-si:ch211-188i4.4	170.638	7.93	1.00137	7.91916	2.39121e-15	3.16317e-14
gene-LOC101883788	114.064	7.92821	1.14162	6.94468	3.79329e-12	3.63216e-11
gene-LOC557301	112.71	7.9272	1.19143	6.65354	2.86123e-11	2.46618e-10
gene-ttyh1-2	20.8757	7.92327	1.85284	4.27629	1.90033e-05	7.31357e-05
gene-chadlb	20.8755	7.92195	2.08032	3.80805	0.00014007	0.000460049
gene-LOC103909181	20.7898	7.91755	1.8616	4.2531	2.10834e-05	8.04601e-05
gene-si:dkey-48j7.3	171.981	7.91371	0.993492	7.96555	1.64487e-15	2.21088e-14
gene-lhx6	20.7135	7.91176	1.85543	4.2641	2.0071e-05	7.69512e-05
gene-zgc:152945	20.6371	7.90597	1.87973	4.2059	2.60041e-05	9.7571e-05
gene-LOC797212	20.5893	7.90224	1.94351	4.06596	4.7835e-05	0.000170752
gene-lcmt1	20.5893	7.90224	1.94351	4.06596	4.7835e-05	0.000170752
gene-dnai2b	167.414	7.90107	0.944577	8.36467	6.02849e-17	9.30536e-16
gene-pcdh1g2	20.5418	7.9002	1.86464	4.23685	2.26678e-05	8.5949e-05
gene-LOC108179554	20.5323	7.9001	1.92677	4.10019	4.12818e-05	0.000149273
gene-pimr144	20.4465	7.89417	1.96162	4.0243	5.71445e-05	0.000201155
gene-LOC110437816	20.4082	7.89045	1.86001	4.24217	2.21374e-05	8.41103e-05
gene-LOC101886347	55.3343	7.88838	1.57411	5.01133	5.40541e-07	2.66677e-06
gene-LOC559637	55.3057	7.88768	1.57452	5.00956	5.45534e-07	2.69038e-06
gene-LOC101882435	54.9814	7.88051	1.60445	4.91167	9.03037e-07	4.28773e-06
gene-ankrd31-2	166.352	7.86949	0.96375	8.16549	3.20142e-16	4.64538e-15
gene-zgc:171558	55.085	7.86853	1.58476	4.96512	6.86599e-07	3.32964e-06
gene-si:ch1073-440p11.2	20.0932	7.867	1.96789	3.99768	6.39655e-05	0.000223044
gene-LOC110438781-2	20.0456	7.86487	1.87135	4.20279	2.63649e-05	9.88245e-05
gene-ahsg1	54.9133	7.86445	1.57788	4.98417	6.22283e-07	3.04281e-06
gene-tssk6	108.874	7.86059	1.21359	6.47716	9.34659e-11	7.62475e-10
gene-znf366	54.2751	7.86027	1.58847	4.94832	7.48568e-07	3.60451e-06
gene-pimr128	599.396	7.85812	0.555839	14.1374	2.23402e-45	2.15105e-43
gene-LOC110440171	54.8184	7.85685	1.72949	4.54287	5.54929e-06	2.33939e-05
gene-taar20c	19.931	7.8552	2.02037	3.888	0.000101072	0.000340825
gene-pacrg	815.159	7.85497	0.476766	16.4755	5.50048e-61	1.0793e-58
gene-spata17	162.071	7.85421	0.945286	8.30882	9.666e-17	1.46323e-15
gene-LOC794378	19.8645	7.85259	2.00593	3.91468	9.05225e-05	0.000307734
gene-pimr122-2	161.67	7.85144	0.962585	8.15663	3.44512e-16	4.97392e-15
gene-LOC101887149	19.7974	7.84543	2.10395	3.7289	0.000192319	0.000613907
gene-LOC110439969	19.7688	7.84335	2.08552	3.76086	0.000169333	0.000546869
gene-si:dkey-23f9.8	19.7307	7.84087	1.93859	4.04463	5.24052e-05	0.000185938
gene-mlip	19.7117	7.84082	1.88731	4.1545	3.25996e-05	0.000120136
gene-LOC110439999	19.6734	7.83678	1.92156	4.07834	4.53594e-05	0.000162677
gene-LOC108184043	19.6162	7.83269	1.90731	4.10667	4.01401e-05	0.000145606
gene-LOC101886521-2	158.731	7.82458	0.977016	8.00865	1.15979e-15	1.5802e-14
gene-tm7sf2	209.573	7.82405	0.858798	9.11047	8.2028e-20	1.63306e-18
gene-atpaf2	53.3866	7.82138	1.62011	4.82767	1.38138e-06	6.39596e-06
gene-LOC101886521	52.7393	7.8209	1.62649	4.80844	1.5211e-06	6.99913e-06
gene-LOC103911576	263.893	7.82006	0.846938	9.23334	2.62329e-20	5.44023e-19
gene-si:dkey-91i10.3	106.411	7.81089	1.17178	6.66586	2.6312e-11	2.27852e-10
gene-LOC108191558	19.3012	7.80879	2.14795	3.63547	0.000277475	0.000855887
gene-LOC100536547	313.055	7.80491	0.694424	11.2394	2.6116e-29	1.02801e-27
gene-setd1bb-2	19.1011	7.79565	1.91939	4.06153	4.87513e-05	0.000173831
gene-grin2cb-2	19.0914	7.79356	1.91917	4.0609	4.88839e-05	0.000174232
gene-pkd1b	512.272	7.7911	0.773289	10.0753	7.10605e-24	1.93131e-22
gene-LOC101884995	102.521	7.79044	1.1872	6.56204	5.3077e-11	4.45046e-10
gene-si:ch211-126g16.10	19.0342	7.78936	1.9073	4.08398	4.42714e-05	0.000159254
gene-LOC110438183	51.5939	7.78858	1.66939	4.66553	3.07825e-06	1.35067e-05
gene-csdc2a	51.5462	7.788	1.70183	4.57625	4.73392e-06	2.01435e-05
gene-si:dkey-43k4.3	103.531	7.78784	1.15992	6.71411	1.89224e-11	1.66817e-10
gene-tmem132a	18.9961	7.7873	1.8931	4.11353	3.89657e-05	0.000141749
gene-zc2hc1c	157.871	7.78596	1.02974	7.56109	3.99699e-14	4.69081e-13
gene-pimr179	157.47	7.78432	1.01228	7.68987	1.47282e-14	1.80452e-13
gene-LOC107980443	18.9484	7.78306	1.89542	4.10625	4.02134e-05	0.000145776
gene-LOC100003556	18.9294	7.78294	1.98317	3.92449	8.69146e-05	0.000296246
gene-LOC100537673	103.597	7.7719	1.17294	6.62602	3.44852e-11	2.94397e-10
gene-LOC563567-2	51.4307	7.76623	1.64347	4.7255	2.29555e-06	1.02956e-05
gene-gas2l2	620.874	7.76343	0.607847	12.772	2.34966e-37	1.46647e-35
gene-ak1	203.552	7.76167	0.970101	8.0009	1.23518e-15	1.67411e-14
gene-LOC110437728-2	18.6525	7.75981	1.95618	3.96681	7.28401e-05	0.000251383
gene-LOC103909809	51.1445	7.75948	1.61464	4.8057	1.54209e-06	7.08437e-06
gene-cdk21	202.31	7.75351	0.834552	9.29063	1.53384e-20	3.26979e-19
gene-LOC110437794	50.2397	7.75239	1.69236	4.58081	4.6318e-06	1.97581e-05
gene-LOC103911631	18.5	7.74905	1.90145	4.07535	4.59457e-05	0.000164666
gene-sycp3	763.437	7.74877	0.519774	14.908	2.92595e-50	3.39843e-48
gene-LOC110437729	18.4141	7.74259	1.91436	4.04448	5.24389e-05	0.000185998
gene-iqcg	149.63	7.73956	0.97081	7.97227	1.55788e-15	2.09832e-14
gene-foxj1b	253.796	7.73678	0.86967	8.89622	5.77789e-19	1.06591e-17
gene-si:ch211-209f23.7	18.2997	7.73387	1.94423	3.97787	6.95358e-05	0.000240843
gene-LOC110440124	50.0474	7.72973	1.58678	4.87132	1.10854e-06	5.2062e-06
gene-LOC100536500	18.2328	7.72732	1.92286	4.01866	5.85311e-05	0.000205589
gene-LOC110439132	18.1947	7.72518	1.91306	4.03812	5.38816e-05	0.000190784
gene-LOC110438463	49.3043	7.72147	1.60363	4.81498	1.47211e-06	6.77883e-06
gene-LOC110438979	18.1183	7.71856	1.9096	4.04197	5.30038e-05	0.000187856
gene-nrgna	196.891	7.71419	0.834243	9.24694	2.31015e-20	4.82153e-19
gene-LOC108190663	1126.93	7.7032	0.468827	16.4308	1.15175e-60	2.24296e-58
gene-tekt3	48.5314	7.69865	1.60711	4.79038	1.66464e-06	7.62031e-06
gene-gpc1a-2	17.8702	7.69862	1.91658	4.01685	5.89803e-05	0.000206999
gene-wasf1	17.7844	7.69194	1.91481	4.01707	5.89263e-05	0.000206865
gene-si:ch211-284k5.2	243.037	7.69164	0.778297	9.88265	4.95062e-23	1.26456e-21
gene-LOC568866-2	17.7463	7.68966	1.96936	3.90466	9.43582e-05	0.000319892
gene-galnt8b.1	48.1117	7.686	1.59918	4.80622	1.53809e-06	7.06849e-06
gene-ppp2r2cb	17.6794	7.68292	1.93088	3.97897	6.92133e-05	0.000239793
gene-LOC110438021	48.4159	7.68158	1.59084	4.82864	1.37471e-06	6.36964e-06
gene-agr1	17.546	7.6736	2.06999	3.70707	0.000209673	0.000663986
gene-si:ch211-151h10.2	333.458	7.66948	0.673775	11.3828	5.09096e-30	2.11655e-28
gene-LOC110438781	17.5077	7.66936	1.92168	3.99096	6.58066e-05	0.000228878
gene-cfap74	706.849	7.66924	0.709612	10.8076	3.16717e-27	1.08366e-25
gene-LOC110437995	47.9389	7.66731	1.59516	4.8066	1.53516e-06	7.05799e-06
gene-LOC793148	17.4789	7.66568	2.26612	3.38273	0.000717693	0.00204072
gene-si:dkey-65l23.2	188.105	7.65744	0.84889	9.02053	1.87176e-19	3.60182e-18
gene-klhl23	142.148	7.65376	0.954839	8.01576	1.09458e-15	1.4945e-14
gene-agtr1a	139.964	7.64221	0.976392	7.82699	4.99674e-15	6.40384e-14
gene-LOC101887036	17.1355	7.63727	2.02548	3.77061	0.000162852	0.000528045
gene-LOC103909067	17.1069	7.63491	2.01322	3.79239	0.000149206	0.000487523
gene-qpctlb	17.021	7.62782	1.98205	3.84844	0.000118871	0.000396048
gene-LOC108183846	17.0116	7.6278	1.93388	3.9443	8.00338e-05	0.000274273
gene-taar20u	46.0314	7.6262	1.80074	4.23503	2.28524e-05	8.65855e-05
gene-LOC101884350	16.983	7.62547	1.93488	3.94106	8.11235e-05	0.000277824
gene-LOC571561	16.9638	7.6231	1.96595	3.87757	0.000105507	0.000354578
gene-zgc:172182	327.607	7.62033	0.69438	10.9743	5.08006e-28	1.83257e-26
gene-LOC101887156	92.2242	7.61842	1.25555	6.0678	1.29673e-09	9.25252e-09
gene-drc3	499.496	7.61806	0.596997	12.7606	2.71962e-37	1.69329e-35
gene-LOC110440181	92.1012	7.61774	1.27868	5.95751	2.56109e-09	1.75628e-08
gene-zgc:153219	16.8683	7.61436	2.2142	3.43888	0.000584135	0.00169141
gene-LOC101884942	16.8494	7.61366	1.94535	3.91378	9.08626e-05	0.000308728
gene-si:dkey-25e12.3-2	92.6812	7.60399	1.22752	6.19461	5.84307e-10	4.34016e-09
gene-ccdc115	16.7157	7.60181	1.97723	3.84468	0.000120709	0.000401705
gene-LOC110438010	45.7158	7.59761	1.60305	4.73948	2.14268e-06	9.63832e-06
gene-LOC101883276	16.5346	7.58744	1.97511	3.84152	0.000122273	0.000406232
gene-si:ch211-152c8.2	315.826	7.58476	0.655334	11.5739	5.58971e-31	2.44147e-29
gene-LOC110437948	44.6865	7.57924	1.60968	4.70852	2.4952e-06	1.11274e-05
gene-ccdc36	492.348	7.57812	0.539987	14.0339	9.67199e-45	9.0113e-43
gene-rhd	16.4199	7.57559	2.09169	3.62175	0.000292618	0.000897786
gene-lgi1b	16.401	7.57536	1.9544	3.87605	0.000106165	0.000356651
gene-LOC101886468	45.0288	7.57523	1.61012	4.70476	2.54167e-06	1.13074e-05
gene-taar20l	44.4668	7.57395	1.70643	4.43847	9.06005e-06	3.67639e-05
gene-has3	16.3724	7.57293	1.95886	3.86599	0.000110641	0.000370508
gene-LOC100329795	3133.39	7.56115	0.438721	17.2345	1.46253e-66	3.75059e-64
gene-LOC101882164	16.2482	7.56072	2.01151	3.75873	0.000170776	0.000550981
gene-LOC108179509	16.191	7.55577	1.99312	3.79093	0.000150086	0.000490087
gene-zgc:112408-3	16.134	7.55268	2.22059	3.4012	0.000670901	0.00192102
gene-zgc:194621	43.7706	7.54933	1.60797	4.69495	2.6667e-06	1.18332e-05
gene-muc5.2	130.215	7.54577	1.2895	5.85169	4.86605e-09	3.21192e-08
gene-LOC100534990	16.0384	7.54343	1.98316	3.80374	0.000142526	0.000467582
gene-LOC103910353	16.029	7.54315	2.10267	3.58741	0.00033398	0.001014
gene-LOC100536928	43.4747	7.53953	1.62013	4.65365	3.26106e-06	1.42509e-05
gene-LOC101887157	15.9715	7.53597	2.0152	3.73957	0.000184336	0.000590538
gene-pou3f1	15.9335	7.53345	1.96362	3.8365	0.000124798	0.000413984
gene-LOC103911046	15.9429	7.53345	2.00576	3.75592	0.000172709	0.000556384
gene-LOC110440115	15.9048	7.53096	1.96604	3.83051	0.000127876	0.000423382
gene-LOC103910249	43.1791	7.53019	1.61256	4.6697	3.01642e-06	1.32601e-05
gene-LOC110438326	43.0548	7.52699	1.69903	4.43016	9.4164e-06	3.80906e-05
gene-zgc:193811	275.449	7.51624	1.7975	4.1815	2.8959e-05	0.000107753
gene-LOC103911298	15.7426	7.51582	1.97031	3.81455	0.000136433	0.000449072
gene-si:ch211-271e10.1	171.693	7.51578	0.861796	8.72107	2.75583e-18	4.79052e-17
gene-cdkl1	607.061	7.5114	0.55122	13.6269	2.77197e-42	2.27205e-40
gene-si:ch73-103b9.2	342.374	7.51034	0.652101	11.5171	1.08153e-30	4.68441e-29
gene-LOC101884995-2	42.5683	7.50923	1.63589	4.59031	4.42595e-06	1.89639e-05
gene-dzank1-2	42.9489	7.50698	1.60895	4.66576	3.07471e-06	1.34934e-05
gene-LOC107197950	15.6282	7.50569	1.97559	3.79921	0.00014516	0.000475381
gene-or137-4	15.609	7.5031	1.99502	3.76092	0.000169291	0.000546802
gene-hykk.2	42.2727	7.49922	1.61209	4.65186	3.2896e-06	1.43707e-05
gene-dlg3	42.5769	7.49439	1.62057	4.62454	3.75436e-06	1.62721e-05
gene-LOC103910072	42.6054	7.4937	1.63513	4.58294	4.58489e-06	1.95865e-05
gene-LOC101882114	15.4849	7.49087	2.22834	3.36164	0.000774823	0.00218899
gene-LOC108181584	15.3896	7.48254	2.01457	3.71422	0.000203835	0.000647556
gene-si:dkey-159a18.1	15.3515	7.47998	1.98584	3.76666	0.000165448	0.000535927
gene-LOC108184002	15.3513	7.4784	2.4052	3.10926	0.00187556	0.00486859
gene-lrrc4bb	15.3323	7.47734	2.00035	3.73801	0.000185479	0.000593831
gene-si:ch211-232d19.4	83.4948	7.47579	1.17163	6.38065	1.7634e-10	1.39207e-09
gene-myo15ab	582.261	7.47335	0.504704	14.8074	1.31219e-49	1.4713e-47
gene-si:ch211-127n13.2	41.2713	7.47306	1.96841	3.7965	0.000146752	0.000480109
gene-zgc:174358-2	15.2656	7.47217	2.00511	3.72657	0.000194101	0.000618833
gene-LOC110440092	41.8994	7.47092	1.61285	4.63214	3.61909e-06	1.57226e-05
gene-pcsk9	15.2275	7.46921	2.15324	3.46882	0.000522745	0.00152835
gene-LOC101883176	336.294	7.46561	0.701984	10.635	2.04778e-26	6.66326e-25
gene-zgc:91968	15.1987	7.46435	2.04846	3.64388	0.000268557	0.000831604
gene-LOC100538123	15.1987	7.46435	2.04846	3.64388	0.000268557	0.000831604
gene-jakmip2	123.707	7.4641	0.984443	7.58206	3.40117e-14	4.02806e-13
gene-zgc:92162	41.1085	7.45901	1.65568	4.50511	6.63399e-06	2.75983e-05
gene-kctd20	208.459	7.45587	0.824835	9.03923	1.57784e-19	3.05896e-18
gene-taar20t	41.5748	7.45434	1.7199	4.33418	1.46303e-05	5.73803e-05
gene-LOC101882873	15.0748	7.4538	1.99683	3.73281	0.000189354	0.000605339
gene-ftr85	82.1209	7.45161	1.16881	6.37537	1.82519e-10	1.43735e-09
gene-nnt2	364.651	7.44723	0.625557	11.905	1.11528e-32	5.27133e-31
gene-rfx1a	1635.09	7.44194	0.375541	19.8166	2.14177e-87	1.38685e-84
gene-LOC566927	14.9317	7.44049	2.04001	3.64729	0.000265024	0.000821687
gene-or132-3	14.8362	7.42978	2.02477	3.66944	0.000243078	0.000759647
gene-scn1ba	120.492	7.42648	1.00197	7.41186	1.24537e-13	1.38261e-12
gene-maats1	1013.13	7.425	0.426662	17.4025	7.89437e-68	2.22252e-65
gene-LOC100007727	14.779	7.42439	2.01228	3.68954	0.000224661	0.000707384
gene-ankrd45	80.3652	7.42	1.16953	6.34444	2.23236e-10	1.74106e-09
gene-abcg2b-2	14.7217	7.41899	2.00491	3.70042	0.000215243	0.000679852
gene-b3gat1a-2	40.5158	7.4186	1.68041	4.41475	1.01128e-05	4.06728e-05
gene-LOC108191330	14.6931	7.41629	2.00318	3.70225	0.000213692	0.000675392
gene-adgre9	323.539	7.41457	0.648407	11.435	2.7939e-30	1.17667e-28
gene-iqca1-2	40.3631	7.41009	1.75134	4.23111	2.32545e-05	8.80062e-05
gene-capn9	78.6489	7.40628	1.19611	6.19198	5.94134e-10	4.40936e-09
gene-LOC103911992	39.4387	7.40062	1.73871	4.25639	2.07756e-05	7.93555e-05
gene-LOC110437838	14.5309	7.39991	2.02405	3.65599	0.000256189	0.000796489
gene-LOC108190067	14.5309	7.39991	2.02405	3.65599	0.000256189	0.000796489
gene-LOC110438844	14.5309	7.39991	2.02405	3.65599	0.000256189	0.000796489
gene-LOC101886224	196.012	7.39712	2.07549	3.56404	0.000365192	0.00110089
gene-LOC101884110	14.4547	7.3941	2.18679	3.38126	0.000721554	0.00205035
gene-lrrc10b	39.2672	7.39237	1.62431	4.55108	5.33724e-06	2.25587e-05
gene-pimr141	14.4164	7.38892	2.0117	3.67297	0.000239752	0.000750248
gene-LOC110437991	39.1433	7.38868	1.63623	4.51567	6.31155e-06	2.63798e-05
gene-LOC110439018	118.286	7.38535	0.986636	7.48538	7.13407e-14	8.12218e-13
gene-si:dkey-93n13.3-2	116.694	7.37874	0.971406	7.59594	3.05572e-14	3.63557e-13
gene-casc5	388.765	7.37692	0.60088	12.2769	1.20589e-34	6.4267e-33
gene-fam69c	116.265	7.37379	0.978677	7.53445	4.90397e-14	5.68821e-13
gene-pimr47	14.2447	7.37227	2.03487	3.62296	0.000291248	0.000893794
gene-LOC110439164	14.2542	7.37222	2.03069	3.63041	0.000282972	0.000871079
gene-LOC108191718	39.0848	7.36935	1.62566	4.53313	5.81159e-06	2.44162e-05
gene-neto2b-2	14.1875	7.36665	2.0541	3.58632	0.000335379	0.00101789
gene-LOC110438057	38.999	7.36634	1.62449	4.53455	5.77267e-06	2.42724e-05
gene-ccdc65	14.1397	7.36101	2.02089	3.64247	0.000270035	0.000835524
gene-LOC100150003-2	14.1397	7.36101	2.02089	3.64247	0.000270035	0.000835524
gene-ap3b2	38.3703	7.3591	1.65668	4.44207	8.90981e-06	3.62167e-05
gene-LOC108191595	14.1301	7.35874	2.27402	3.23601	0.00121215	0.00327963
gene-gabrd	14.1206	7.35822	2.07844	3.54026	0.000399728	0.00119471
gene-ttc12	618.457	7.35709	0.5079	14.4853	1.50045e-47	1.5734e-45
gene-ntn5-2	14.0539	7.35256	2.02854	3.62455	0.000289464	0.000888949
gene-zgc:101810	14.0349	7.35164	2.39882	3.06469	0.00217895	0.00557568
gene-LOC103911096-2	14.0347	7.34968	2.04996	3.58528	0.000336716	0.00102135
gene-ak8-2	188.644	7.34602	0.857933	8.56246	1.10484e-17	1.83086e-16
gene-si:dkey-78l4.13	13.968	7.34403	2.04947	3.58338	0.000339174	0.00102808
gene-LOC110439374	13.9394	7.34117	2.05944	3.56463	0.000364363	0.0010989
gene-LOC101882702	13.9394	7.34117	2.05944	3.56463	0.000364363	0.0010989
gene-bfsp2	13.9489	7.34114	2.0339	3.60939	0.000306919	0.000938106
gene-LOC108183829	13.9489	7.34114	2.0339	3.60939	0.000306919	0.000938106
gene-myhz1.2	38.312	7.34017	1.62951	4.50452	6.65247e-06	2.76707e-05
gene-fbln1	189.359	7.33796	0.796901	9.20812	3.31883e-20	6.8223e-19
gene-LOC100535191	152.763	7.33552	0.859976	8.52992	1.46449e-17	2.39015e-16
gene-cnn1a	13.8917	7.33542	2.03035	3.61288	0.000302812	0.000927085
gene-LOC103909076	13.8631	7.33256	2.03078	3.61071	0.000305365	0.000934237
gene-mfi2	422.893	7.33183	2.0804	3.52424	0.000424697	0.00126409
gene-glra2	13.8439	7.3297	2.08378	3.51751	0.000435623	0.00129408
gene-si:ch211-220f16.1	38.0448	7.32889	1.64747	4.44857	8.64458e-06	3.51994e-05
gene-fgf6b	13.8058	7.32682	2.03613	3.5984	0.000320185	0.000974859
gene-erich3	489.685	7.3215	0.559646	13.0824	4.15295e-39	2.8085e-37
gene-LOC110438822-2	13.7581	7.321	2.05656	3.55983	0.00037109	0.00111672
gene-stmn1b	969.098	7.31572	0.440511	16.6074	6.16388e-62	1.27721e-59
gene-fgf3	13.7103	7.31539	2.1622	3.38331	0.00071617	0.00203684
gene-c1ql4b-4	13.7103	7.31539	2.1622	3.38331	0.00071617	0.00203684
gene-LOC110440225	13.6531	7.30947	2.12857	3.43399	0.000594765	0.00171893
gene-si:ch73-272h24.1	37.4439	7.3071	1.63782	4.46147	8.13982e-06	3.33327e-05
gene-fam150a	72.9534	7.30671	1.30466	5.60045	2.13793e-08	1.29652e-07
gene-slc2a1a	13.5958	7.30356	2.10104	3.47616	0.000508646	0.0014915
gene-LOC101885758	37.3483	7.30269	1.63781	4.45883	8.24093e-06	3.36935e-05
gene-LOC110440116	220.899	7.30066	0.726786	10.0451	9.6516e-24	2.60674e-22
gene-LOC108191638	13.5578	7.30061	2.04426	3.57127	0.000355255	0.00107293
gene-LOC108179664	72.8577	7.29668	1.20806	6.03999	1.5412e-09	1.08482e-08
gene-si:ch211-255a21.2	37.1577	7.29517	1.66617	4.3784	1.19552e-05	4.74561e-05
gene-LOC108180085	221.06	7.29356	0.753518	9.67933	3.69112e-22	8.84401e-21
gene-si:dkey-208b23.5	756.456	7.28529	1.48309	4.91224	9.00401e-07	4.27678e-06
gene-LOC110440075	13.3861	7.28285	2.09442	3.47726	0.000506558	0.00148605
gene-LOC110439139	179.382	7.28279	0.832977	8.74308	2.26836e-18	3.98053e-17
gene-LOC101886714	13.3859	7.28065	2.39102	3.04499	0.00232685	0.00591093
gene-setd1bb	36.7472	7.27811	1.65584	4.39541	1.10562e-05	4.41447e-05
gene-qrfprb	73.7905	7.27643	1.20222	6.05249	1.42626e-09	1.01016e-08
gene-chst12b	13.3192	7.27392	2.10682	3.45255	0.000555306	0.00161498
gene-LOC103910364	180.705	7.27083	0.854355	8.51032	1.73452e-17	2.79912e-16
gene-LOC110438205	72.1602	7.26403	1.2075	6.01577	1.79037e-09	1.25162e-08
gene-six7	36.3561	7.26313	1.6465	4.41127	1.02768e-05	4.12554e-05
gene-zgc:111983	36.4901	7.25988	1.89678	3.82749	0.000129459	0.000428241
gene-LOC100331996	13.1569	7.25598	2.17199	3.3407	0.000835678	0.00234328
gene-LOC108181471	13.1475	7.25582	2.06289	3.5173	0.000435959	0.00129493
gene-LOC103908871	13.1283	7.2529	2.15479	3.36595	0.000762807	0.00215716
gene-gls2a	71.6731	7.25275	1.23346	5.88001	4.10242e-09	2.73365e-08
gene-si:dkey-27j5.5	35.9555	7.24792	1.64139	4.41572	1.00675e-05	4.05031e-05
gene-LOC100535405	72.3305	7.24449	1.22532	5.91234	3.37282e-09	2.27557e-08
gene-si:ch211-233g6.2	13.0141	7.24271	2.47185	2.93007	0.00338883	0.008251
gene-LOC110438901	13.0139	7.24059	2.10231	3.44412	0.000572931	0.00166139
gene-LOC103909470	35.8216	7.23804	1.72054	4.20684	2.58969e-05	9.72158e-05
gene-hcar1-2	12.9375	7.23161	2.21685	3.26212	0.00110583	0.00301972
gene-LOC110440093	12.9185	7.2314	2.09468	3.45226	0.000555906	0.00161618
gene-si:ch211-214b16.3	70.1668	7.22106	1.61673	4.46647	7.95215e-06	3.26571e-05
gene-cfap61	1252.16	7.21869	0.533285	13.5363	9.55298e-42	7.78088e-40
gene-capslb	139.864	7.21766	0.860912	8.38374	5.12733e-17	7.96659e-16
gene-nptxrb-3	34.7542	7.21607	1.68672	4.27817	1.88434e-05	7.25422e-05
gene-LOC103911277	12.7849	7.2159	2.07467	3.47809	0.000505003	0.00148216
gene-si:ch211-284e13.4-2	12.7755	7.21578	2.17119	3.32342	0.000889206	0.00248102
gene-si:dkey-210j14.3	68.5831	7.21056	1.2366	5.83095	5.51126e-09	3.61203e-08
gene-cfap77-3	69.4399	7.20401	1.78513	4.03556	5.44731e-05	0.000192721
gene-pimr123-2	12.661	7.20301	2.2704	3.17257	0.00151097	0.00399548
gene-si:rp71-1p14.7	380.173	7.20273	0.595804	12.0891	1.20624e-33	5.98521e-32
gene-LOC110440126	102.212	7.2024	1.0165	7.08551	1.38535e-12	1.39146e-11
gene-syngr3b	70.2887	7.20195	1.23439	5.83441	5.39824e-09	3.54333e-08
gene-gyg1b	12.6419	7.20023	2.1129	3.40776	0.000654993	0.00187874
gene-LOC110438469	12.6419	7.20023	2.1129	3.40776	0.000654993	0.00187874
gene-LOC101886926	34.3822	7.20008	1.65105	4.3609	1.29527e-05	5.11884e-05
gene-LOC101885577	12.6324	7.19978	2.30228	3.12724	0.00176454	0.00460766
gene-cacna2d4b-2	35.0105	7.19883	1.86533	3.85929	0.000113718	0.000379905
gene-LOC103909383	34.7721	7.19443	1.72995	4.15875	3.19998e-05	0.000118134
gene-LOC100329231	34.6673	7.19412	1.64862	4.36371	1.27874e-05	5.0589e-05
gene-si:dkey-22h13.5	12.5941	7.19389	2.08312	3.45342	0.000553532	0.0016109
gene-gfi1ab	12.5941	7.19389	2.08312	3.45342	0.000553532	0.0016109
gene-coro2bb	34.22	7.19323	1.65849	4.33722	1.44296e-05	5.66362e-05
gene-prss60.2-2	12.5749	7.19081	2.16644	3.31918	0.000902823	0.00251603
gene-LOC101882302	12.5463	7.1876	2.1515	3.34074	0.000835544	0.00234316
gene-LOC110438357	12.5369	7.18757	2.08463	3.44788	0.000564997	0.00163948
gene-LOC798566-2	12.5179	7.18666	2.48213	2.89536	0.00378725	0.00912669
gene-smc1a	34.0102	7.18511	1.6565	4.33752	1.44102e-05	5.6577e-05
gene-si:ch73-173p19.2	69.3633	7.18491	1.21454	5.91574	3.30381e-09	2.23381e-08
gene-si:dkey-145c18.3	12.5177	7.18439	2.13835	3.35978	0.000780035	0.00220108
gene-zgc:162324	103.087	7.18339	1.03178	6.96214	3.35132e-12	3.23527e-11
gene-taar20j	34.4668	7.18188	1.72396	4.16592	3.10099e-05	0.000114725
gene-si:ch211-77g15.32-2	12.4891	7.18119	2.1269	3.37636	0.000734517	0.00208376
gene-cnga3a	33.9242	7.18099	1.68621	4.25865	2.05662e-05	7.86484e-05
gene-si:dkey-151j17.4	268.064	7.17837	0.800182	8.97092	2.9404e-19	5.58353e-18
gene-LOC103910083	12.4605	7.17798	2.11715	3.39039	0.000697932	0.00199175
gene-ankef1b	682.538	7.1777	0.444497	16.1479	1.17487e-58	1.98891e-56
gene-pimr147	12.4129	7.17446	2.27527	3.15323	0.00161474	0.00424904
gene-LOC110439187	33.7142	7.17314	1.74659	4.10694	4.00939e-05	0.000145465
gene-si:ch211-278p9.2-2	33.6856	7.17178	1.74048	4.12058	3.77916e-05	0.000137865
gene-LOC103910452	12.3843	7.17117	2.30735	3.10797	0.00188378	0.00488796
gene-pimr48-2	12.3557	7.16786	2.3432	3.059	0.00222076	0.00567221
gene-traf5	305.426	7.1618	0.648347	11.0462	2.28603e-28	8.42255e-27
gene-slc17a7b	65.52	7.16146	1.48257	4.83044	1.36231e-06	6.31574e-06
gene-kirrel3l	338.694	7.16137	0.675206	10.6062	2.78864e-26	8.96136e-25
gene-si:ch73-290k24.6	134.178	7.1568	0.892974	8.01457	1.10523e-15	1.50825e-14
gene-LOC110439775	33.7514	7.15536	1.65044	4.33542	1.45485e-05	5.70766e-05
gene-gmnc	33.6942	7.15298	1.65106	4.33236	1.47519e-05	5.7787e-05
gene-LOC101886891	33.6561	7.15107	1.67006	4.28193	1.85275e-05	7.14642e-05
gene-LOC110438962	12.2029	7.14894	2.10892	3.38986	0.000699275	0.00199536
gene-si:ch211-278p9.2	66.531	7.14599	1.2123	5.89456	3.75684e-09	2.51372e-08
gene-best1	33.4939	7.14424	1.66173	4.29928	1.7135e-05	6.633e-05
gene-si:ch211-184m13.4	12.1647	7.14268	2.28107	3.13128	0.00174045	0.00454842
gene-iqch-2	506.075	7.14247	0.56356	12.6738	8.25701e-37	5.00855e-35
gene-LOC799523	68.6471	7.14159	1.54944	4.60916	4.043e-06	1.74287e-05
gene-si:ch211-270n8.3	12.098	7.13578	2.10873	3.38393	0.000714567	0.0020334
gene-barx2	12.098	7.13578	2.10873	3.38393	0.000714567	0.0020334
gene-dclk2b	12.098	7.13578	2.10873	3.38393	0.000714567	0.0020334
gene-pgp	32.7791	7.1331	1.78575	3.99446	6.48421e-05	0.000225798
gene-elavl3	97.3266	7.13299	1.03827	6.8701	6.41566e-12	6.00115e-11
gene-si:dkeyp-3f10.14	12.0788	7.13262	2.2139	3.22174	0.00127414	0.00343052
gene-si:ch73-81k8.2	164.399	7.12342	0.788145	9.03821	1.59255e-19	3.08517e-18
gene-spef2	1248.33	7.12181	0.382546	18.6169	2.34615e-77	1.04772e-74
gene-cfap58	624.256	7.11993	0.468166	15.2081	3.12294e-52	3.9846e-50
gene-LOC797394	11.9549	7.11926	2.11816	3.36107	0.000776421	0.00219279
gene-LOC108183310	32.4073	7.1154	1.66908	4.26306	2.01648e-05	7.72503e-05
gene-taar20o	32.8545	7.11406	1.68567	4.22031	2.43964e-05	9.20455e-05
gene-qrfpra	11.9071	7.11253	2.13445	3.33226	0.00086143	0.00241184
gene-LOC797974	11.888	7.10949	2.28724	3.10833	0.00188149	0.00488253
gene-LOC101882863	769.168	7.10484	0.455696	15.5912	8.3543e-55	1.20214e-52
gene-LOC559991	192.848	7.10374	0.734962	9.66545	4.22763e-22	1.00736e-20
gene-LOC103910253	11.8307	7.10263	2.2405	3.17011	0.00152379	0.0040269
gene-LOC565594	162.148	7.09962	0.916106	7.74978	9.20514e-15	1.14902e-13
gene-LOC110438780	11.7927	7.0991	2.1191	3.35005	0.000807979	0.00227225
gene-hfe2	31.9684	7.09536	1.66584	4.25934	2.05035e-05	7.84664e-05
gene-tacr3l	65.2225	7.09418	1.22676	5.78283	7.34533e-09	4.72792e-08
gene-pvalb1	11.7354	7.09235	2.12309	3.34058	0.000836031	0.00234402
gene-si:ch211-14k19.8	94.5122	7.08953	1.02626	6.90811	4.91158e-12	4.65137e-11
gene-p2rx3b	32.2439	7.08717	1.67916	4.22065	2.43595e-05	9.19195e-05
gene-LOC110440006	32.2439	7.08717	1.67916	4.22065	2.43595e-05	9.19195e-05
gene-wfs1a	63.8687	7.08555	1.21693	5.82249	5.79785e-09	3.78921e-08
gene-tnmd	11.6877	7.08552	2.16183	3.27755	0.00104711	0.00287605
gene-fabp1a	11.6877	7.08552	2.16183	3.27755	0.00104711	0.00287605
gene-nek12	353.476	7.0841	0.594762	11.9108	1.03953e-32	4.92226e-31
gene-LOC796257-2	11.6304	7.07867	2.14415	3.30138	0.000962093	0.00266458
gene-sycp2	639.745	7.07851	0.467142	15.1528	7.25968e-52	9.17235e-50
gene-LOC108180805	31.9194	7.0709	1.71095	4.13274	3.58462e-05	0.000131193
gene-kcnn1b	575.474	7.07009	0.518432	13.6375	2.39787e-42	1.97166e-40
gene-si:dkey-47k20.2	11.5541	7.06851	2.24742	3.14516	0.00165995	0.00435828
gene-LOC110437743	187.878	7.06687	0.760742	9.28944	1.55099e-20	3.30363e-19
gene-si:zfos-375h5.1	31.6905	7.06201	1.67985	4.20395	2.62301e-05	9.83476e-05
gene-LOC103911332	155.414	7.06153	0.803777	8.78544	1.55758e-18	2.7689e-17
gene-LOC108180723	11.4968	7.0615	2.21044	3.19462	0.00140017	0.00373365
gene-LOC110437768	2056.58	7.05903	0.350836	20.1206	4.86895e-90	3.70914e-87
gene-LOC101885372	11.4682	7.058	2.19524	3.21514	0.00130382	0.00350314
gene-si:dkey-265c15.9	31.6049	7.05798	1.71887	4.10617	4.02276e-05	0.000145788
gene-LOC110438303-2	31.538	7.05636	1.66586	4.23587	2.27673e-05	8.63012e-05
gene-LOC110439848	62.5427	7.0559	1.20004	5.87971	4.10977e-09	2.73784e-08
gene-pnx	11.3729	7.04754	2.16401	3.25671	0.00112713	0.00307271
gene-LOC796257	11.3729	7.04754	2.16401	3.25671	0.00112713	0.00307271
gene-si:ch211-57m13.9	186.378	7.04566	0.720611	9.77734	1.40865e-22	3.4715e-21
gene-LOC110437817	11.3537	7.04398	2.15466	3.26919	0.00107856	0.00295272
gene-kif26bb	61.9414	7.04076	1.23501	5.70096	1.19132e-08	7.47311e-08
gene-LOC101885529	11.3346	7.04073	2.30073	3.06021	0.00221183	0.00565144
gene-star	790.857	7.03888	0.682111	10.3193	5.76645e-25	1.69339e-23
gene-LOC101882861	11.306	7.03714	2.27648	3.09124	0.00199321	0.00514513
gene-mthfd1l-2	30.6803	7.03519	1.67199	4.20766	2.58024e-05	9.69123e-05
gene-LOC101884770	629.589	7.03468	2.35346	2.98908	0.00279822	0.00696489
gene-aqp3b	31.3284	7.03433	1.99821	3.52032	0.00043103	0.00128161
gene-LOC110438957-2	11.2584	7.03338	2.22891	3.15552	0.0016021	0.00421731
gene-sult1st5	11.2393	7.0299	2.14685	3.27452	0.00105842	0.00290403
gene-LOC563925	62.4365	7.02935	1.23965	5.67045	1.42425e-08	8.84217e-08
gene-wu:fc34e06	95.817	7.02679	1.41996	4.94858	7.4757e-07	3.60038e-06
gene-LOC108191800	11.2201	7.02638	2.21859	3.16705	0.00153996	0.00406755
gene-LOC101885628	11.2201	7.02638	2.21859	3.16705	0.00153996	0.00406755
gene-cremb-2	31.4898	7.02523	2.41271	2.91175	0.00359406	0.00871138
gene-LOC110438063	30.851	7.02404	1.6682	4.21055	2.54749e-05	9.57379e-05
gene-dnaaf1	546.391	7.02369	0.481237	14.5951	3.01827e-48	3.20394e-46
gene-LOC100149234	11.1724	7.01979	2.43883	2.87834	0.00399776	0.00958248
gene-nphs2	30.7936	7.01644	1.76133	3.9836	6.78778e-05	0.000235418
gene-LOC101885562	11.1248	7.01567	2.17333	3.22807	0.00124629	0.00336285
gene-si:dkey-183c6.9	30.66	7.00858	1.7976	3.89886	9.66476e-05	0.000326926
gene-fam213ab	30.5459	7.00549	1.79658	3.89934	9.64548e-05	0.000326359
gene-LOC101885738	30.7361	7.00124	2.08314	3.36091	0.000776875	0.00219383
gene-cidea	29.8789	6.99687	1.67681	4.17273	3.00973e-05	0.000111636
gene-LOC103910489	60.0524	6.99606	1.21697	5.74875	8.99037e-09	5.72462e-08
gene-LOC103908877	119.876	6.99325	0.880217	7.94492	1.94317e-15	2.59166e-14
gene-dzip1-2	117.073	6.99323	0.996048	7.02098	2.20323e-12	2.17229e-11
gene-si:ch73-265h17.1	180.719	6.99231	0.731994	9.55241	1.26709e-21	2.92503e-20
gene-neflb	29.7739	6.99174	1.68909	4.13934	3.48301e-05	0.000127654
gene-tmem184bb	58.8131	6.99101	1.28614	5.43566	5.45939e-08	3.11943e-07
gene-pimr190	30.1449	6.98861	1.69464	4.12396	3.72418e-05	0.000136032
gene-LOC110438501	29.6306	6.98726	1.83057	3.81699	0.000135091	0.000445165
gene-si:dkey-26i13.5	10.9148	6.98672	2.21316	3.1569	0.00159453	0.00419972
gene-cfap206	859.342	6.9858	0.677169	10.3162	5.95416e-25	1.74455e-23
gene-foxj1a	935.341	6.98491	0.531875	13.1326	2.14155e-39	1.47522e-37
gene-LOC108179567	88.4533	6.98356	1.24359	5.61564	1.95834e-08	1.19236e-07
gene-si:ch211-147k9.8-2	10.8768	6.98309	2.18336	3.19833	0.00138226	0.00369245
gene-nek5	10.8481	6.97942	2.19495	3.17977	0.00147394	0.0039048
gene-LOC101882952	10.8195	6.97573	2.20894	3.15796	0.00158879	0.00418629
gene-LOC101886598	10.7718	6.96833	2.17524	3.20347	0.0013578	0.0036331
gene-kcnq3	10.7623	6.96831	2.24441	3.10474	0.00190448	0.00493822
gene-taar20w	29.7441	6.96546	1.77389	3.92666	8.61351e-05	0.000293821
gene-si:ch211-199m3.4	1982.58	6.96495	0.332669	20.9366	2.4867e-97	2.68367e-94
gene-LOC100333085	10.7431	6.96463	2.17437	3.20306	0.00135975	0.00363757
gene-taar20c-2	10.7431	6.96463	2.17437	3.20306	0.00135975	0.00363757
gene-si:ch211-122l14.5	87.6608	6.96434	1.0057	6.92485	4.36446e-12	4.16214e-11
gene-fnbp1a	114.697	6.95901	0.949981	7.32542	2.38151e-13	2.57766e-12
gene-LOC110437967	10.6954	6.95724	2.25275	3.08833	0.00201283	0.00519007
gene-LOC101885013	10.6668	6.95348	2.2368	3.10867	0.0018793	0.00487734
gene-ghsra	10.6382	6.94972	2.22318	3.12602	0.0017719	0.004625
gene-si:ch211-160d14.6-2	10.6382	6.94972	2.22318	3.12602	0.0017719	0.004625
gene-pimr130	116.06	6.94669	0.873601	7.95179	1.83836e-15	2.45947e-14
gene-LOC101884874	10.6001	6.946	2.20505	3.15005	0.00163245	0.00429175
gene-zgc:92040	86.153	6.93883	1.02091	6.79669	1.07049e-11	9.75606e-11
gene-si:dkey-111e8.4-2	28.6958	6.9383	1.69449	4.09464	4.22828e-05	0.000152615
gene-scn3b	56.6282	6.93595	1.28555	5.39534	6.83946e-08	3.84438e-07
gene-swap70a	29.0381	6.93419	1.69655	4.08723	4.36554e-05	0.000157219
gene-LOC110438782	10.4951	6.93086	2.18975	3.16514	0.00155008	0.00409305
gene-iqch	171.085	6.93071	0.78218	8.86077	7.94653e-19	1.4464e-17
gene-LOC110437849-2	29.0571	6.92986	1.81204	3.82434	0.000131121	0.000433346
gene-LOC108180013	10.4665	6.92707	2.19009	3.16291	0.00156202	0.00412205
gene-LOC108179792	10.4187	6.91946	2.26238	3.05849	0.00222454	0.00567943
gene-egflam	399.204	6.91885	0.606595	11.4061	3.90013e-30	1.62669e-28
gene-dynlt1	141.731	6.91715	0.793192	8.72064	2.76622e-18	4.80536e-17
gene-tshba	10.3901	6.9156	2.24699	3.07773	0.00208587	0.00535867
gene-LOC110439364	10.352	6.91179	2.2159	3.11917	0.00181359	0.00472336
gene-LOC110439807	10.352	6.91179	2.2159	3.11917	0.00181359	0.00472336
gene-si:ch211-214c11.1	10.3615	6.91174	2.23403	3.09385	0.00197577	0.00510365
gene-pfkmb	10.3615	6.91174	2.23403	3.09385	0.00197577	0.00510365
gene-ccr10	28.5609	6.90409	1.82914	3.7745	0.000160326	0.000520182
gene-si:ch1073-324l1.1	10.2948	6.90405	2.24406	3.07658	0.00209387	0.00537548
gene-LOC108191931	226.766	6.90219	0.71572	9.6437	5.22707e-22	1.23415e-20
gene-LOC797842	10.2662	6.90016	2.26219	3.0502	0.00228686	0.00582174
gene-ppp2r2ba	27.9135	6.89857	1.6894	4.08345	4.43723e-05	0.000159557
gene-LOC110439036	27.7706	6.89665	1.88931	3.65035	0.000261887	0.000812739
gene-fam26f	10.247	6.89627	2.20634	3.12566	0.00177404	0.0046292
gene-taar20t-2	10.2375	6.89624	2.28327	3.02033	0.00252501	0.00636003
gene-tbx6l	55.0159	6.89247	1.26406	5.45262	4.9632e-08	2.8529e-07
gene-LOC110438538	10.1992	6.88858	2.31038	2.98157	0.00286771	0.00711461
gene-ccdc13	583.911	6.88527	0.443888	15.5113	2.91067e-54	4.05318e-52
gene-si:dkey-34o23.2	247.288	6.88519	0.648799	10.6122	2.61523e-26	8.42502e-25
gene-LOC110438035	28.113	6.88208	1.86497	3.69018	0.000224099	0.000705701
gene-LOC101885184	10.1325	6.88067	2.21819	3.10193	0.00192266	0.00497988
gene-LOC101885092	10.1325	6.88067	2.21819	3.10193	0.00192266	0.00497988
gene-si:dkey-40g16.6	27.4554	6.87435	1.71321	4.01256	6.00645e-05	0.000210404
gene-camkvb-2	56.13	6.87399	1.24643	5.51493	3.48912e-08	2.04646e-07
gene-c3b.1-2	276.628	6.87397	0.788858	8.71382	2.93792e-18	5.08549e-17
gene-LOC110438594	10.0753	6.87279	2.23964	3.06871	0.00214988	0.00550836
gene-LOC101885740	10.0848	6.87274	2.24576	3.06032	0.00221103	0.00564994
gene-LOC101886261	27.3601	6.86965	1.69451	4.05407	5.03343e-05	0.000179081
gene-si:ch211-248l17.3-3	10.0181	6.86483	2.27203	3.02145	0.0025157	0.00633966
gene-phyhiplb	163.357	6.86284	0.762233	9.0036	2.18436e-19	4.1878e-18
gene-aqp8a.1	9.97032	6.85686	2.22218	3.08564	0.00203114	0.00523208
gene-dnah7	4464.32	6.85681	0.360121	19.0403	7.91231e-81	3.94109e-78
gene-LOC100002481	27.5878	6.85541	1.7865	3.83735	0.00012437	0.000412777
gene-tbx3a	27.4735	6.85425	1.70761	4.01393	5.97154e-05	0.000209295
gene-LOC103911864	9.94171	6.85287	2.2227	3.08313	0.00204839	0.00527283
gene-si:dkey-182i3.11	9.94171	6.85287	2.2227	3.08313	0.00204839	0.00527283
gene-LOC110439175	9.91309	6.84886	2.22584	3.07697	0.00209113	0.00537059
gene-LOC108180199	9.90362	6.84865	2.37498	2.88366	0.00393078	0.00943745
gene-sp5a	53.308	6.84784	1.28144	5.34388	9.09778e-08	5.0297e-07
gene-zgc:173705	26.8638	6.84464	1.82756	3.74524	0.000180224	0.000578436
gene-or137-8	27.3111	6.84075	1.7863	3.82957	0.000128368	0.000424902
gene-utrnp	9.83672	6.83673	2.26988	3.01193	0.00259594	0.00652094
gene-adgre15	82.6205	6.83644	1.105	6.1868	6.13984e-10	4.54626e-09
gene-LOC100535622	219.598	6.83269	0.741897	9.20975	3.26883e-20	6.73021e-19
gene-LOC100151089-2	79.0082	6.83264	1.0623	6.43193	1.25996e-10	1.01047e-09
gene-pimr145	9.77001	6.82862	2.28258	2.99162	0.00277503	0.00691316
gene-or132-4	9.77948	6.82859	2.24973	3.03529	0.00240301	0.00608176
gene-sox21b	9.77948	6.82859	2.24973	3.03529	0.00240301	0.00608176
gene-LOC110438661	9.77948	6.82859	2.24973	3.03529	0.00240301	0.00608176
gene-mamdc2b	107.081	6.82783	0.975697	6.9979	2.59835e-12	2.54345e-11
gene-LOC100002818	54.5942	6.82534	1.3461	5.07044	3.96904e-07	1.99771e-06
gene-LOC110437849	26.5301	6.82517	1.70344	4.00669	6.15752e-05	0.00021526
gene-srgn-2	320.244	6.82374	0.599134	11.3893	4.72548e-30	1.96776e-28
gene-si:dkey-48g21.7	9.72225	6.82043	2.24019	3.04458	0.00233005	0.00591674
gene-LOC101886928	105.156	6.81829	0.948286	7.19012	6.4736e-13	6.70423e-12
gene-tmem8c	26.3487	6.81467	1.71603	3.97117	7.15196e-05	0.000247155
gene-galnt8b.2	52.9348	6.81201	1.25564	5.42513	5.79128e-08	3.30178e-07
gene-si:ch211-22d5.2	51.934	6.81189	1.31005	5.1997	1.99612e-07	1.04978e-06
gene-sebox	9.63641	6.80811	2.24617	3.03098	0.00243759	0.00615721
gene-stxbp1b-2	9.63641	6.80811	2.24617	3.03098	0.00243759	0.00615721
gene-arhgap9	212.13	6.80784	0.653803	10.4127	2.17011e-25	6.56636e-24
gene-si:dkey-92f12.2	1788.75	6.80412	0.367094	18.5351	1.07606e-76	4.35485e-74
gene-iqub-3	263.57	6.80397	0.832261	8.17529	2.95165e-16	4.29981e-15
gene-si:dkeyp-51b9.3	9.58865	6.7998	2.29606	2.96151	0.00306131	0.00754146
gene-LOC110438187	52.4199	6.79918	1.25383	5.42272	5.87003e-08	3.34226e-07
gene-ftr52p	26.4621	6.79918	1.70216	3.99444	6.4847e-05	0.000225798
gene-galnt8a.2	9.56003	6.79562	2.28278	2.9769	0.00291178	0.0072115
gene-zgc:174353-3	9.56003	6.79562	2.28278	2.9769	0.00291178	0.0072115
gene-chst3a	52.2194	6.7932	1.22241	5.55724	2.74071e-08	1.63339e-07
gene-LOC101883267	9.53142	6.79144	2.2723	2.9888	0.0028008	0.0069693
gene-ebf2	26.2713	6.78827	1.70694	3.97686	6.98326e-05	0.000241777
gene-si:dkey-23f9.11	25.7383	6.78444	1.81016	3.74798	0.000178262	0.000573205
gene-LOC110437961	9.47418	6.78306	2.25967	3.00178	0.00268403	0.00671033
gene-LOC108179597	9.47418	6.78306	2.25967	3.00178	0.00268403	0.00671033
gene-LOC100007210	9.47418	6.78306	2.25967	3.00178	0.00268403	0.00671033
gene-LOC110439447	9.47418	6.78306	2.25967	3.00178	0.00268403	0.00671033
gene-LOC103909426	26.1282	6.78076	1.70463	3.97784	6.95441e-05	0.000240843
gene-zbbx	536.19	6.77994	0.504974	13.4263	4.23947e-41	3.31742e-39
gene-cox5b2	232.383	6.77986	0.633928	10.695	1.07419e-26	3.54881e-25
gene-nkx2.9	25.7095	6.77908	1.71144	3.96103	7.46267e-05	0.000257035
gene-si:ch211-286b5.2	487.825	6.77854	0.835378	8.11433	4.88466e-16	6.94309e-15
gene-LOC101885459	9.41695	6.77464	2.25827	2.99992	0.00270049	0.00674454
gene-LOC795662-2	9.41695	6.77464	2.25827	2.99992	0.00270049	0.00674454
gene-spred3	25.966	6.77132	1.70747	3.9657	7.31809e-05	0.000252459
gene-olfcg8	9.39781	6.77049	2.3647	2.86315	0.00419449	0.00999463
gene-cpne4a	124.626	6.7701	0.998118	6.78287	1.17811e-11	1.06582e-10
gene-LOC108190589	25.9182	6.7673	1.72838	3.91541	9.02517e-05	0.000306894
gene-LOC110438065	9.35972	6.76617	2.26838	2.98282	0.00285604	0.00708904
gene-trpm1a	9.35972	6.76617	2.26838	2.98282	0.00285604	0.00708904
gene-slc18a1	9.35972	6.76617	2.26838	2.98282	0.00285604	0.00708904
gene-si:ch211-160d20.5	102.321	6.76303	0.88523	7.63985	2.17473e-14	2.62845e-13
gene-LOC103910488	9.33111	6.76192	2.27787	2.96852	0.00299233	0.0073906
gene-si:ch73-151m17.5	9.34058	6.7619	2.32451	2.90896	0.00362639	0.00877823
gene-col11a1a	25.3756	6.76024	1.7113	3.95035	7.80364e-05	0.00026796
gene-pimr115	76.0013	6.75734	1.06405	6.35058	2.14498e-10	1.67897e-09
gene-fam228a	150.981	6.75567	1.03784	6.50939	7.5458e-11	6.22432e-10
gene-rsph4a	985.772	6.75384	0.554571	12.1785	4.04683e-34	2.07558e-32
gene-LOC799072	9.27387	6.75334	2.30609	2.92849	0.00340615	0.00828926
gene-fam169aa-2	9.24526	6.74903	2.32503	2.90277	0.00369878	0.00893677
gene-glt8d2-2	50.5595	6.74649	1.29632	5.20435	1.94681e-07	1.02551e-06
gene-LOC100331077	25.5652	6.74552	1.76508	3.82165	0.00013256	0.000437604
gene-prss60.1	9.21664	6.74468	2.34751	2.87312	0.00406438	0.00972936
gene-LOC110439816	25.0892	6.74457	1.79279	3.76206	0.00016852	0.000544514
gene-vip	25.4985	6.7444	1.71497	3.93266	8.40095e-05	0.000286952
gene-ppef2b	180.494	6.74294	0.791543	8.51873	1.61316e-17	2.61631e-16
gene-ralyl	9.1975	6.74037	2.27717	2.95998	0.00307663	0.00757489
gene-bicc2	226.076	6.7394	0.682668	9.87214	5.4979e-23	1.39883e-21
gene-stx12l	24.9558	6.73655	1.71828	3.92052	8.83599e-05	0.000300974
gene-nitr3r.1l-2	9.16888	6.73605	2.27651	2.95894	0.00308704	0.00759689
gene-cand2-2	50.2157	6.73569	1.2364	5.44783	5.09885e-08	2.92698e-07
gene-ccdc173	348.622	6.73487	0.566172	11.8954	1.24992e-32	5.89695e-31
gene-LOC101886147	100.088	6.73014	0.920267	7.31325	2.60764e-13	2.80367e-12
gene-si:dkey-31b16.11	25.2885	6.72967	1.76524	3.81233	0.000137665	0.000452611
gene-LOC108179642	25.4505	6.72703	2.06495	3.25772	0.00112312	0.00306274
gene-nme5	446.382	6.72579	0.489398	13.743	5.61087e-43	4.70314e-41
gene-LOC108183355	75.2847	6.72551	1.04865	6.41351	1.42208e-10	1.13298e-09
gene-si:dkey-196j8.2	9.08304	6.72298	2.29268	2.93237	0.00336389	0.00819413
gene-spns2-2	9.08304	6.72298	2.29268	2.93237	0.00336389	0.00819413
gene-ablim2	142.263	6.72194	1.24569	5.39616	6.80814e-08	3.82843e-07
gene-ttpa	50.6824	6.71847	1.32934	5.05399	4.32674e-07	2.16513e-06
gene-LOC100149647	74.6553	6.71469	1.03894	6.46302	1.02637e-10	8.3257e-10
gene-smad3a	24.4498	6.71427	2.22028	3.02406	0.00249404	0.00628877
gene-LOC108181236	9.02581	6.71418	2.3192	2.89505	0.00379104	0.00913157
gene-LOC101884093	9.02581	6.71418	2.3192	2.89505	0.00379104	0.00913157
gene-tagln3b-2	9.03528	6.71414	2.3234	2.88979	0.00385496	0.00926829
gene-LOC103910380	25.0118	6.71365	1.76545	3.80279	0.000143073	0.000469144
gene-tnip2	173.446	6.71225	0.695036	9.65741	4.57273e-22	1.08659e-20
gene-pmfbp1	123.946	6.71191	0.817005	8.21526	2.11699e-16	3.12612e-15
gene-zmp:0000000755	514.501	6.70931	0.478925	14.0091	1.37102e-44	1.26825e-42
gene-si:ch211-173n18.3-2	8.97805	6.70528	2.30369	2.91067	0.00360653	0.00873587
gene-stxbp4	73.1293	6.70343	1.16181	5.76982	7.93573e-09	5.09023e-08
gene-hoxc13b	24.6398	6.69449	1.71941	3.89349	9.88143e-05	0.000333775
gene-si:ch211-160d14.6	24.183	6.69091	1.72528	3.87817	0.000105247	0.000353842
gene-LOC103910356	47.8315	6.69051	1.2851	5.20622	1.92724e-07	1.01541e-06
gene-LOC100536910	49.5279	6.68609	1.31514	5.08393	3.69701e-07	1.86659e-06
gene-LOC100004160	72.1465	6.68486	1.21488	5.50246	3.74518e-08	2.18576e-07
gene-LOC103909472	97.0156	6.68484	0.914233	7.31196	2.63265e-13	2.82939e-12
gene-dlx5a	8.83497	6.68296	2.30869	2.89469	0.00379529	0.0091401
gene-LOC101885212-2	24.0494	6.68245	1.72378	3.87662	0.00010592	0.000355873
gene-c24h18orf63	291.275	6.68045	0.556188	12.0111	3.10526e-33	1.50899e-31
gene-myhc4	24.3917	6.67958	1.72241	3.87803	0.000105305	0.000353963
gene-cyp27a1.2	8.80635	6.67845	2.31932	2.87948	0.00398327	0.00955285
gene-LOC571865	165.95	6.67571	0.738444	9.04024	1.56329e-19	3.03751e-18
gene-nptxrb	48.2118	6.67461	1.40423	4.75322	2.00198e-06	9.04787e-06
gene-pimr82	23.8682	6.67373	1.77682	3.75599	0.000172655	0.000556334
gene-dyrk4	192.438	6.67273	0.668404	9.98309	1.80756e-23	4.78219e-22
gene-e2f7	261.296	6.67016	0.594035	11.2286	2.95233e-29	1.15861e-27
gene-aep1	24.2676	6.66871	1.78586	3.73417	0.000188332	0.000602444
gene-LOC101885179	24.1723	6.6661	1.72702	3.85989	0.000113436	0.000379111
gene-mcmdc2	412.66	6.66037	0.598533	11.1278	9.18371e-29	3.49291e-27
gene-npas4l	8.70136	6.66019	2.32155	2.86886	0.00411952	0.00984133
gene-LOC110437910	8.70136	6.66019	2.32155	2.86886	0.00411952	0.00984133
gene-klhl10b.2	115.105	6.65961	1.0495	6.34551	2.21684e-10	1.72999e-09
gene-gabrb1	24.1916	6.65952	1.96316	3.39225	0.000693211	0.00197959
gene-caps2	118.613	6.6583	0.833691	7.98653	1.38789e-15	1.87521e-14
gene-LOC100001178-2	23.9528	6.65246	1.73281	3.83911	0.000123483	0.000409992
gene-neb-2	23.4958	6.65124	1.91296	3.47694	0.000507179	0.0014877
gene-si:ch211-176l24.4	8.64413	6.65102	2.31718	2.87031	0.00410067	0.00980715
gene-mapk15	882.372	6.64995	1.7487	3.80279	0.000143074	0.000469144
gene-pimr47-2	23.4103	6.64957	1.96299	3.38747	0.000705398	0.00200996
gene-plg	47.3817	6.64931	1.40227	4.74181	2.11813e-06	9.53787e-06
gene-LOC103910250	47.3152	6.64896	1.245	5.34053	9.26761e-08	5.11922e-07
gene-ryr2a	674.677	6.64819	0.46529	14.2883	2.58958e-46	2.62003e-44
gene-cyp4t8-2	8.61551	6.64642	2.31992	2.86493	0.00417102	0.00994692
gene-LOC100535728	354.445	6.64384	0.532837	12.4688	1.10469e-35	6.31625e-34
gene-LOC100331776	23.7525	6.64096	1.7281	3.84292	0.000121579	0.000404136
gene-nrxn1b	121.387	6.6405	0.961592	6.90573	4.99446e-12	4.72122e-11
gene-LOC100006761	70.0382	6.63884	1.08707	6.10712	1.01443e-09	7.3332e-09
gene-pimr63	46.0283	6.63462	1.2826	5.17278	2.30633e-07	1.20194e-06
gene-LOC103909878	23.6475	6.63388	1.73252	3.82904	0.000128646	0.000425658
gene-frmpd2	164.067	6.63048	0.733916	9.03439	1.64924e-19	3.19021e-18
gene-lrrtm1	45.7803	6.62683	1.284	5.16107	2.45547e-07	1.27428e-06
gene-zgc:112408	23.4281	6.61992	1.73851	3.80782	0.000140198	0.000460354
gene-LOC103909850	46.1514	6.61359	1.27982	5.1676	2.37119e-07	1.23301e-06
gene-ccdc88aa-2	182.64	6.60555	0.72388	9.1252	7.16032e-20	1.43212e-18
gene-zgc:195001	67.6732	6.5996	1.62098	4.07136	4.67399e-05	0.000167304
gene-itgb7-3	23.3515	6.59726	2.18346	3.02147	0.00251547	0.00633966
gene-nlgn4a	68.9977	6.59691	1.11774	5.902	3.59128e-09	2.41041e-08
gene-LOC103910262	22.6659	6.59675	1.7391	3.7932	0.00014872	0.000486119
gene-si:dkey-199f5.3	67.9968	6.5957	1.04268	6.32574	2.52016e-10	1.95375e-09
gene-LOC100538302	23.0466	6.59463	1.8106	3.64223	0.000270281	0.000836187
gene-mef2b	115.329	6.59237	0.849291	7.7622	8.34697e-15	1.04644e-13
gene-si:dkey-162h11.3	263.631	6.59191	0.783192	8.41673	3.87147e-17	6.08095e-16
gene-LOC101884238-2	68.5491	6.58953	1.05997	6.2167	5.07721e-10	3.79852e-09
gene-zgc:92249	2410.01	6.58728	0.304027	21.6667	4.22583e-104	6.19823e-101
gene-si:ch73-110p20.1	67.5386	6.58532	1.05828	6.22266	4.88797e-10	3.66541e-09
gene-tnnc1b	22.4275	6.58464	1.83976	3.57907	0.000344821	0.00104349
gene-LOC101887033	44.2919	6.57932	1.29379	5.0853	3.67052e-07	1.85466e-06
gene-LOC101882097	22.7602	6.57816	1.73832	3.78421	0.000154198	0.000502058
gene-si:dkey-124l13.1	44.9875	6.57632	1.30134	5.05352	4.33751e-07	2.16968e-06
gene-tgm1l3	111.048	6.57448	0.835665	7.86736	3.62201e-15	4.7048e-14
gene-zmp:0000000794	65.8795	6.57428	1.14181	5.75776	8.52365e-09	5.44039e-08
gene-LOC103911637	22.7125	6.57379	1.75554	3.74459	0.000180689	0.000579713
gene-tmem163b	22.2557	6.56992	1.74448	3.76613	0.0001658	0.0005368
gene-LOC561147	67.6234	6.56939	1.04542	6.28396	3.30054e-10	2.52921e-09
gene-LOC108179074	155.033	6.56812	0.771241	8.51631	1.64723e-17	2.66656e-16
gene-LOC563500	112.544	6.56792	0.887732	7.39853	1.37696e-13	1.52152e-12
gene-slc4a8	453.294	6.5676	0.538916	12.1867	3.65994e-34	1.88088e-32
gene-LOC100331480	179.652	6.56427	0.67803	9.68138	3.61798e-22	8.68483e-21
gene-ccdc114	571.207	6.56424	0.47346	13.8644	1.04087e-43	9.20119e-42
gene-LOC110439135	46.2165	6.5626	1.59365	4.11796	3.82234e-05	0.000139283
gene-ttc6	1291.82	6.56246	0.382561	17.154	5.86642e-66	1.46102e-63
gene-LOC101884387	22.5027	6.56131	1.76221	3.72334	0.000196606	0.000626359
gene-si:dkey-263f15.2	89.0395	6.56025	0.901455	7.27739	3.40331e-13	3.62456e-12
gene-LOC103911763	22.0934	6.55919	1.75449	3.73851	0.000185111	0.000592726
gene-slc10a4	22.4932	6.55847	1.83005	3.58376	0.000338679	0.0010267
gene-LOC108179505	22.0743	6.55841	1.80211	3.6393	0.000273382	0.000844568
gene-adgb	1324.37	6.55152	0.379767	17.2514	1.09168e-66	2.82756e-64
gene-si:dkey-58i8.5	66.784	6.55148	1.05983	6.18163	6.34442e-10	4.68702e-09
gene-LOC100001363	21.9504	6.54997	1.74673	3.74985	0.00017694	0.00056945
gene-tshr	89.2484	6.54936	0.923667	7.09061	1.33521e-12	1.34512e-11
gene-cfap43	1894.03	6.54918	0.56232	11.6467	2.38479e-31	1.06314e-29
gene-ccdc78	44.1095	6.5467	1.2534	5.22317	1.75889e-07	9.31067e-07
gene-LOC108183698	22.3689	6.54552	1.88873	3.46557	0.000529115	0.0015454
gene-LOC110440125	196.863	6.5449	0.63522	10.3034	6.8048e-25	1.98481e-23
gene-fam83b	21.693	6.5417	2.16649	3.01949	0.00253199	0.00637577
gene-m1ap	481.065	6.54095	0.465069	14.0645	6.27819e-45	5.89528e-43
gene-cetn2	65.449	6.5401	1.08829	6.00952	1.86072e-09	1.298e-08
gene-si:ch73-344o19.1	198.891	6.53903	0.905439	7.22195	5.12486e-13	5.35886e-12
gene-LOC101885948	21.7404	6.53605	1.78909	3.65327	0.000258917	0.000804199
gene-hoxc6b	42.9465	6.53591	1.31793	4.95921	7.07786e-07	3.42131e-06
gene-LOC100007785	43.7185	6.53458	1.30313	5.01454	5.31616e-07	2.62624e-06
gene-c3a.6	1642.14	6.53073	0.460174	14.1919	1.0286e-45	1.00535e-43
gene-ccdc105	1019.2	6.52802	0.348225	18.7465	2.06575e-78	9.72817e-76
gene-sept3	130.525	6.5265	0.753862	8.65742	4.8258e-18	8.21783e-17
gene-olfcq19	21.4736	6.52643	2.13093	3.06271	0.00219342	0.00560992
gene-LOC101886535	21.4163	6.52354	2.20898	2.95319	0.00314513	0.00772004
gene-scg5	43.2796	6.51987	1.294	5.03853	4.69113e-07	2.33619e-06
gene-dzank1	135.053	6.51575	1.01201	6.43844	1.20707e-10	9.70643e-10
gene-LOC108183934	21.3778	6.51143	1.77386	3.67077	0.000241822	0.000756089
gene-LOC100534851	21.3017	6.50861	1.80385	3.60818	0.000308348	0.00094225
gene-prkar2ab	85.8337	6.50678	0.904855	7.19096	6.43353e-13	6.66806e-12
gene-celsr1b	648.158	6.5046	0.948346	6.85888	6.94006e-12	6.46366e-11
gene-bag2	21.2634	6.50363	1.76036	3.69449	0.000220331	0.00069468
gene-dnm1b	106.601	6.50286	0.851283	7.6389	2.19082e-14	2.64543e-13
gene-LOC108185957	21.2253	6.50213	1.76782	3.67805	0.000235022	0.000736759
gene-si:dkey-14d8.20	42.7927	6.50198	1.27894	5.08389	3.6978e-07	1.86663e-06
gene-LOC100148581	42.8125	6.50158	1.78435	3.64367	0.000268777	0.000832064
gene-si:ch211-13f8.1	21.2061	6.49981	1.75713	3.69911	0.000216358	0.000683068
gene-LOC110438020	41.8781	6.49893	1.30519	4.97928	6.38205e-07	3.11185e-06
gene-tsga10	925.814	6.49831	0.400021	16.2449	2.42634e-59	4.33412e-57
gene-grm6a	21.1584	6.49652	1.785	3.63951	0.000273153	0.000843963
gene-LOC101884463	21.558	6.49534	1.80389	3.60073	0.000317324	0.000967056
gene-kcnj5	42.5257	6.49379	1.2545	5.17639	2.26223e-07	1.17991e-06
gene-LOC108190121	41.5248	6.49175	1.39127	4.66606	3.07031e-06	1.3478e-05
gene-lim2.2	107.687	6.49121	0.869403	7.46628	8.24934e-14	9.3304e-13
gene-LOC108183538	21.0725	6.49051	1.7712	3.66447	0.000247856	0.000773274
gene-kcna4	61.8537	6.49021	1.22499	5.29818	1.1696e-07	6.37092e-07
gene-spag8	275.743	6.487	2.12141	3.05787	0.00222914	0.00569004
gene-znf541	360.666	6.48625	0.513356	12.635	1.35398e-36	8.13674e-35
gene-myh7bb	20.9293	6.48463	2.02747	3.19838	0.00138201	0.00369215
gene-prok2	123.63	6.4801	0.943049	6.87144	6.35574e-12	5.9494e-11
gene-pimr64	104.769	6.47801	0.889855	7.27985	3.34195e-13	3.5636e-12
gene-LOC103909573	21.1574	6.4709	1.75782	3.6812	0.000232139	0.000728803
gene-LOC103911530	21.3575	6.46905	2.12352	3.04639	0.0023161	0.00588655
gene-zgc:123035	21.0907	6.46529	1.80531	3.58127	0.000341931	0.00103552
gene-si:ch211-149b19.2	108.725	6.46316	1.13412	5.69884	1.20622e-08	7.55376e-08
gene-rad21b	228.673	6.46286	0.597	10.8256	2.60491e-27	8.984e-26
gene-LOC108184035	20.6431	6.46197	1.87745	3.44189	0.000577674	0.00167383
gene-nkx3.2	62.9195	6.46141	1.10447	5.85023	4.90881e-09	3.23767e-08
gene-LOC101885315	40.7139	6.46011	1.34783	4.79299	1.64316e-06	7.52866e-06
gene-usp21	61.9762	6.46003	1.05205	6.14041	8.23109e-10	6.01392e-09
gene-LOC100331080	40.6472	6.45562	1.3142	4.9122	9.00608e-07	4.27698e-06
gene-LOC110439101	20.9093	6.45352	1.76086	3.66499	0.000247352	0.000771887
gene-LOC100329676	20.8901	6.45058	1.78205	3.61975	0.000294892	0.000904442
gene-LOC108183290	20.4619	6.44786	1.76961	3.64366	0.000268788	0.000832064
gene-LOC100332973	20.8331	6.44387	1.90252	3.38702	0.000706563	0.00201283
gene-acot15-2	20.3473	6.44318	2.00884	3.20741	0.00133936	0.0035908
gene-fam110c	40.1797	6.43915	1.3207	4.87554	1.08509e-06	5.09978e-06
gene-fhod3a	165.921	6.43561	0.728188	8.83784	9.75883e-19	1.76388e-17
gene-klhl10b.1-2	40.7223	6.42946	1.29236	4.97497	6.52564e-07	3.17648e-06
gene-srgn	335.81	6.42841	0.888764	7.23297	4.72543e-13	4.9713e-12
gene-si:dkey-32e6.6	120.89	6.42713	0.822847	7.81084	5.6808e-15	7.2375e-14
gene-pih1d3-3	20.1184	6.42463	1.88954	3.4001	0.00067361	0.00192808
gene-dnah3	1913.7	6.42373	0.410989	15.63	4.55097e-55	6.65958e-53
gene-urgcp	20.0803	6.42052	1.79531	3.57628	0.000348516	0.00105393
gene-fbn2a	234.732	6.41983	0.748693	8.57472	9.93268e-18	1.65126e-16
gene-cep126-2	163.852	6.41567	0.756588	8.47975	2.25678e-17	3.61714e-16
gene-mtl5	539.048	6.41233	0.428053	14.9802	9.89035e-51	1.19149e-48
gene-LOC108179803	19.9277	6.41053	1.78495	3.59143	0.000328873	0.000999547
gene-adgrg11-2	81.1482	6.40887	0.950871	6.74	1.58387e-11	1.41072e-10
gene-LOC101883877	142.54	6.40501	0.888324	7.21022	5.5861e-13	5.82001e-12
gene-scn4aa	77.831	6.40319	1.89288	3.38278	0.000717564	0.00204058
gene-LOC100330136	19.8322	6.40249	1.80217	3.55265	0.00038137	0.00114566
gene-LOC110437881	19.756	6.39923	1.82461	3.50717	0.000452894	0.00134138
gene-fgf4	39.8637	6.39846	1.28848	4.96589	6.83871e-07	3.31703e-06
gene-crfb16	20.1459	6.39667	1.80191	3.54994	0.00038532	0.00115551
gene-map1aa	378.996	6.39641	0.491385	13.0171	9.782e-39	6.5132e-37
gene-LOC110440066	39.7776	6.39401	1.4153	4.51777	6.24952e-06	2.61458e-05
gene-LOC797114	19.7177	6.394	1.78446	3.58316	0.000339456	0.0010287
gene-dnaaf3l	457.231	6.39082	0.713164	8.96123	3.21078e-19	6.07468e-18
gene-hmx3b	20.0696	6.38849	1.85798	3.43841	0.00058514	0.00169375
gene-LOC101883751	58.9422	6.38703	1.06645	5.98907	2.11041e-09	1.46037e-08
gene-LOC110438081	58.8563	6.38486	1.06146	6.01514	1.7973e-09	1.25612e-08
gene-LOC101885872	75.8566	6.37858	1.19316	5.34596	8.99375e-08	4.9775e-07
gene-endou2	41.113	6.37697	1.90645	3.34494	0.00082299	0.00231071
gene-LOC101885539	60.9718	6.37118	1.35767	4.69273	2.69578e-06	1.1954e-05
gene-LOC100537554	58.9984	6.37002	1.05589	6.03282	1.61127e-09	1.13191e-08
gene-gpr27	39.9007	6.36713	1.34318	4.74033	2.13373e-06	9.6014e-06
gene-muc5.1	467.772	6.36511	0.692992	9.18498	4.11609e-20	8.38135e-19
gene-LOC101886642	75.6555	6.36396	1.06973	5.94914	2.69555e-09	1.84361e-08
gene-steap3	19.6784	6.36132	1.82408	3.48741	0.000487723	0.00143519
gene-cilp2	38.8144	6.3608	1.28943	4.93302	8.09677e-07	3.87499e-06
gene-pimr209	206.572	6.36057	0.792871	8.0222	1.03868e-15	1.42193e-14
gene-LOC101882691	37.9662	6.3571	1.3272	4.78987	1.66887e-06	7.63564e-06
gene-LOC570021	59.4457	6.35463	1.12581	5.64449	1.65671e-08	1.0178e-07
gene-cldna	38.5663	6.35142	1.28941	4.92585	8.39961e-07	4.01177e-06
gene-mcm6	1709.6	6.35096	0.406379	15.6282	4.68078e-55	6.81106e-53
gene-LOC103909543	37.7754	6.35003	1.33239	4.76589	1.88026e-06	8.53351e-06
gene-sypb	247.871	6.34302	0.601992	10.5367	5.85069e-26	1.8413e-24
gene-LOC100331278	149.994	6.34265	0.772137	8.21441	2.13216e-16	3.14673e-15
gene-hcn3	75.5495	6.3364	0.974444	6.50258	7.89534e-11	6.4961e-10
gene-flj13639	76.3116	6.33393	0.974441	6.50007	8.02836e-11	6.60135e-10
gene-si:dkey-254e1.1-2	519.026	6.33117	0.894201	7.08026	1.43888e-12	1.44452e-11
gene-si:ch211-176g13.7	19.23	6.32937	1.79359	3.52888	0.000417322	0.00124356
gene-slc38a3a-2	37.2028	6.32934	1.35859	4.65874	3.18148e-06	1.39289e-05
gene-LOC110439824	151.137	6.32892	0.682593	9.27187	1.82906e-20	3.86101e-19
gene-oc90-2	73.4418	6.32859	1.1716	5.40169	6.60177e-08	3.7237e-07
gene-si:ch211-76m11.7	54.4407	6.32763	1.62997	3.88205	0.000103579	0.000348686
gene-soga3	18.8113	6.32577	1.82635	3.46361	0.000532974	0.00155509
gene-ccdc153	94.9981	6.32307	0.834154	7.58022	3.44961e-14	4.0817e-13
gene-rab39ba	75.539	6.31994	0.92498	6.83252	8.34369e-12	7.69623e-11
gene-wnt7bb	37.7457	6.31972	1.27737	4.94746	7.51863e-07	3.61701e-06
gene-pak6b	130.818	6.30948	0.721891	8.74021	2.32671e-18	4.07554e-17
gene-LOC100007738	37.4118	6.30684	1.28279	4.91652	8.80984e-07	4.19301e-06
gene-shisa7b	207.337	6.30537	0.619302	10.1814	2.40028e-24	6.74292e-23
gene-LOC796922-2	18.858	6.30123	1.81504	3.47167	0.000517224	0.00151391
gene-shank2	37.2302	6.29746	1.39572	4.51197	6.42269e-06	2.68e-05
gene-opn4.1	96.6175	6.29647	1.06628	5.90511	3.52419e-09	2.36845e-08
gene-LOC101886078	18.4202	6.29506	1.80667	3.48434	0.000493352	0.00145027
gene-nos1apb	18.4202	6.29506	1.80667	3.48434	0.000493352	0.00145027
gene-glt8d2	18.7911	6.29447	1.81523	3.46759	0.000525141	0.00153449
gene-ank1b	183.33	6.29425	0.710132	8.86349	7.75458e-19	1.41345e-17
gene-nrxn1b-2	76.7291	6.28954	1.14501	5.493	3.95161e-08	2.29898e-07
gene-LOC103909073	36.9824	6.28931	1.28199	4.90588	9.30108e-07	4.40738e-06
gene-pimr138	773.273	6.28622	0.394753	15.9244	4.28779e-57	6.77184e-55
gene-LOC103911994	18.3057	6.28619	1.79773	3.49674	0.000470981	0.00139066
gene-glis3	55.7165	6.28609	1.08006	5.82012	5.88071e-09	3.83668e-08
gene-l3mbtl1	111.709	6.28478	0.835541	7.52181	5.40232e-14	6.25191e-13
gene-LOC101882069	73.6973	6.2826	1.01057	6.21689	5.07115e-10	3.7954e-09
gene-phox2bb	36.0103	6.28135	1.35034	4.65169	3.29223e-06	1.43798e-05
gene-dlx1a	36.7534	6.28068	1.28049	4.9049	9.34739e-07	4.42689e-06
gene-prg4b	56.6313	6.27944	1.17491	5.34461	9.06135e-08	5.0117e-07
gene-zgc:194398-2	18.1818	6.27882	1.85814	3.37909	0.000727257	0.00206429
gene-eif2ak1	74.6025	6.2775	1.07527	5.83809	5.28035e-09	3.46947e-08
gene-fam129aa	55.5163	6.27625	1.21398	5.16997	2.34135e-07	1.21913e-06
gene-dgat2	125.496	6.27436	1.22954	5.10303	3.34263e-07	1.69726e-06
gene-LOC556054	53.524	6.27327	1.16544	5.38274	7.336e-08	4.11455e-07
gene-pde4a	162.973	6.27104	0.691269	9.07179	1.17077e-19	2.30077e-18
gene-noxo1a	164.421	6.26768	0.645127	9.71541	2.59212e-22	6.27462e-21
gene-LOC110438987	36.1908	6.25805	1.47493	4.24296	2.20591e-05	8.38507e-05
gene-glulc	35.0847	6.24777	1.42108	4.39649	1.10013e-05	4.39401e-05
gene-pkdcca	18.1805	6.2466	1.81067	3.44989	0.000560806	0.00162859
gene-LOC110439161	35.5798	6.23234	1.30248	4.78496	1.71018e-06	7.80946e-06
gene-LOC100004582	191.741	6.22372	0.686963	9.05976	1.30734e-19	2.55558e-18
gene-zgc:123244-2	70.8063	6.2237	1.05422	5.90361	3.55633e-09	2.38881e-08
gene-proser2	104.051	6.21964	0.821886	7.56752	3.80403e-14	4.48334e-13
gene-sall3b	69.5483	6.21541	0.971318	6.39895	1.56454e-10	1.24228e-09
gene-LOC108180038	51.244	6.21302	1.19421	5.20264	1.96476e-07	1.03455e-06
gene-si:dkey-42l23.2	17.361	6.21218	2.05713	3.01982	0.00252924	0.00637007
gene-fshr-2	67.1732	6.21198	1.3907	4.46679	7.94033e-06	3.26138e-05
gene-LOC100147849	34.9694	6.20836	1.33984	4.63364	3.59285e-06	1.56138e-05
gene-cdc42ep1a	17.342	6.20736	1.82131	3.40818	0.000653985	0.00187647
gene-si:dkey-196h17.9	17.3229	6.20628	1.88502	3.29242	0.000993282	0.00274187
gene-LOC101886225	85.6689	6.20185	0.948039	6.54176	6.07978e-11	5.05854e-10
gene-LOC559800	52.625	6.20155	1.08383	5.72189	1.05345e-08	6.65659e-08
gene-LOC108181140	52.6254	6.19889	1.18993	5.20947	1.89377e-07	9.98384e-07
gene-rassf7b	137.103	6.1965	0.711116	8.71377	2.93926e-18	5.08549e-17
gene-si:ch211-191o15.6	50.6048	6.19644	1.21612	5.09527	3.48238e-07	1.7627e-06
gene-or137-9	17.5413	6.1946	1.81221	3.41825	0.000630252	0.00181299
gene-LOC110440031	34.6828	6.19401	1.37711	4.49784	6.86483e-06	2.84717e-05
gene-cacna2d4a	35.4548	6.193	1.37231	4.51282	6.39721e-06	2.67076e-05
gene-LOC101882124	52.2052	6.19031	1.07654	5.75021	8.91328e-09	5.67789e-08
gene-LOC103908896	34.5113	6.18884	1.30057	4.75858	1.94963e-06	8.82511e-06
gene-isg15	102.714	6.18737	0.795723	7.77578	7.49863e-15	9.42368e-14
gene-arl15a	17.0464	6.18615	1.92324	3.21652	0.00129754	0.00348845
gene-myh7ba	101.199	6.184	0.883452	6.99982	2.56296e-12	2.50976e-11
gene-si:dkey-57n24.6	1375.06	6.18265	0.359227	17.211	2.19611e-66	5.57661e-64
gene-amh	1170.13	6.18001	0.559862	11.0385	2.49287e-28	9.17156e-27
gene-pfkmb-2	34.3201	6.17728	1.61118	3.83401	0.000126073	0.000418013
gene-LOC101882732	34.2349	6.17692	1.46091	4.22814	2.35627e-05	8.90946e-05
gene-LOC100334841	120.502	6.17673	0.809167	7.63344	2.28571e-14	2.75615e-13
gene-kif1ab	303.565	6.17489	0.529246	11.6673	1.87165e-31	8.41626e-30
gene-mapkapk3	120.082	6.17025	0.860842	7.16769	7.62731e-13	7.83637e-12
gene-si:dkey-204a24.11	34.015	6.16583	1.35335	4.55599	5.21402e-06	2.20703e-05
gene-cdc42se2-2	16.7983	6.16473	1.92415	3.20387	0.00135595	0.00362965
gene-plcd3b	120.187	6.1639	0.757853	8.13337	4.17518e-16	5.98055e-15
gene-ptger2a	33.8721	6.16161	1.31635	4.68084	2.85707e-06	1.26131e-05
gene-cnga1	52.3376	6.1616	1.1923	5.16784	2.36821e-07	1.23195e-06
gene-si:dkey-183c6.8	134.678	6.16025	0.687872	8.95551	3.38156e-19	6.38847e-18
gene-zgc:194114	302.799	6.15944	0.501008	12.2941	9.74262e-35	5.23535e-33
gene-LOC110438879	33.8528	6.1586	1.37528	4.47808	7.53163e-06	3.10187e-05
gene-krtt1c19e	16.7314	6.1554	1.82503	3.37277	0.000744174	0.00210908
gene-nsmfa	65.5804	6.15388	1.05215	5.84886	4.94939e-09	3.26066e-08
gene-dnah1	8869.49	6.15146	0.787776	7.80863	5.78113e-15	7.35809e-14
gene-si:ch73-106g13.1	82.7781	6.14952	0.908156	6.77144	1.27508e-11	1.14833e-10
gene-paplnb	32.528	6.14029	1.44135	4.26009	2.04346e-05	7.82375e-05
gene-pdk3b	82.1677	6.13723	0.875766	7.00785	2.42011e-12	2.37707e-11
gene-rundc3aa	16.512	6.13606	1.83195	3.34948	0.000809644	0.00227595
gene-chrdl2	34.0331	6.13372	1.3579	4.51706	6.27052e-06	2.6221e-05
gene-dydc2	261.573	6.13247	0.569956	10.7596	5.34221e-27	1.79933e-25
gene-LOC110439590	50.1731	6.13243	1.08566	5.64858	1.61775e-08	9.94572e-08
gene-prss60.2	16.407	6.12676	1.86306	3.28855	0.00100704	0.00277468
gene-hlfb	16.7399	6.12562	1.82664	3.35349	0.000797998	0.00224662
gene-rhbdl1	165.334	6.12538	0.631451	9.70048	3.00085e-22	7.23696e-21
gene-si:dkey-23f9.12	16.3498	6.1216	1.85035	3.30835	0.000938478	0.00260559
gene-cacng1b	16.302	6.11811	1.92394	3.17998	0.00147284	0.003903
gene-si:ch211-254p10.2	401.688	6.11757	0.575293	10.6338	2.07415e-26	6.74059e-25
gene-sox14	16.245	6.11646	1.95746	3.12469	0.00177994	0.0046432
gene-armc2	409.343	6.11584	0.475009	12.8752	6.20625e-38	4.0187e-36
gene-foxq1a	16.2163	6.11424	1.97496	3.09588	0.00196232	0.0050718
gene-LOC103910422	16.2639	6.11399	1.83824	3.32601	0.000880994	0.00246023
gene-si:ch211-145o7.3	65.5878	6.11349	0.939167	6.50948	7.54121e-11	6.22252e-10
gene-LOC101885216	80.6795	6.11285	0.907566	6.73544	1.63437e-11	1.4547e-10
gene-si:dkey-30j10.5	16.6063	6.11284	1.83977	3.32261	0.000891782	0.00248741
gene-ccdc178	457.759	6.10761	0.425504	14.3538	1.00819e-46	1.04037e-44
gene-LOC110438606	16.5871	6.10752	1.91232	3.19377	0.00140429	0.00374318
gene-slc16a10	561.213	6.10683	0.435187	14.0327	9.83965e-45	9.13465e-43
gene-taar20c1-2	16.1781	6.10656	1.83501	3.3278	0.000875346	0.0024463
gene-LOC101885895	32.641	6.10494	1.41157	4.32493	1.5258e-05	5.96524e-05
gene-popdc3	16.1303	6.10197	1.86533	3.27126	0.00107071	0.00293373
gene-hoxc8a	81.6312	6.10065	0.853712	7.14603	8.93242e-13	9.13378e-12
gene-LOC110439927	181.062	6.10062	0.772915	7.893	2.95001e-15	3.86681e-14
gene-cbln18	16.4537	6.09938	1.87906	3.24598	0.00117049	0.00317986
gene-pimr109	349.835	6.09837	0.607572	10.0373	1.04515e-23	2.81982e-22
gene-fam161a	126.876	6.09832	0.77733	7.84522	4.32207e-15	5.56944e-14
gene-si:ch211-196h16.12	16.0636	6.09688	1.84491	3.3047	0.000950782	0.00263636
gene-wasf3a	79.6393	6.09188	0.885693	6.87809	6.06583e-12	5.68831e-11
gene-slc32a1	63.8715	6.09076	0.962139	6.33044	2.44467e-10	1.89692e-09
gene-LOC100149223	15.9967	6.09034	1.91332	3.18312	0.00145698	0.00386612
gene-omd	32.231	6.08806	1.30696	4.65818	3.19011e-06	1.39596e-05
gene-chrna2a	33.2029	6.08655	1.48616	4.09547	4.21305e-05	0.000152108
gene-LOC110438029	15.93	6.08401	1.84011	3.30632	0.000945304	0.00262313
gene-LOC103908931	65.0334	6.08377	0.970602	6.26804	3.65615e-10	2.79098e-09
gene-LOC101885779	16.3584	6.08335	2.08851	2.91277	0.00358238	0.00868468
gene-tnxba	16.2437	6.08102	1.83698	3.31034	0.000931819	0.00258821
gene-hspb6	32.002	6.07814	1.30901	4.64329	3.42903e-06	1.49445e-05
gene-LOC103909273	15.8536	6.07675	1.86782	3.25339	0.00114037	0.00310683
gene-fam102ba	807.953	6.07636	0.362263	16.7733	3.82463e-63	8.32452e-61
gene-LOC101884175	47.4452	6.07214	1.18468	5.12556	2.96659e-07	1.52064e-06
gene-itga6l	32.7831	6.07075	1.44939	4.18848	2.80832e-05	0.000104659
gene-drd2l	329.409	6.06972	0.517852	11.721	9.95383e-32	4.54699e-30
gene-LOC103912007	30.8389	6.06638	1.53931	3.94098	8.11492e-05	0.000277875
gene-LOC103911288	32.5258	6.06388	1.40883	4.30418	1.67604e-05	6.49737e-05
gene-LOC110440090	31.6109	6.06033	1.32157	4.58571	4.52447e-06	1.93496e-05
gene-pdzd7b	93.098	6.05915	0.854983	7.08687	1.37182e-12	1.3788e-11
gene-ahr1b	143.678	6.05662	0.738414	8.20219	2.36042e-16	3.4587e-15
gene-olfm1a	15.6342	6.05654	1.88534	3.21244	0.00131613	0.00353401
gene-foxp3b	31.4676	6.05216	1.34095	4.51334	6.38151e-06	2.6655e-05
gene-LOC110438051	15.3575	6.03049	1.8877	3.19462	0.00140017	0.00373365
gene-kcnj1a.5	15.3289	6.02772	1.88007	3.20611	0.00134544	0.00360561
gene-LOC101884945	142.045	6.02703	0.766379	7.86429	3.71201e-15	4.81687e-14
gene-tekt4	398.449	6.02365	0.741034	8.12872	4.3386e-16	6.20167e-15
gene-LOC108190784	15.6237	6.02216	1.91834	3.13925	0.00169379	0.00443901
gene-st6galnac6	31.6477	6.01967	1.44264	4.17269	3.01023e-05	0.000111638
gene-LOC101884281	15.5281	6.01383	1.8581	3.23655	0.00120986	0.00327388
gene-LOC103909796	30.5995	6.01206	1.31556	4.56996	4.87813e-06	2.07197e-05
gene-mxb	58.7965	6.00788	1.23681	4.85756	1.1884e-06	5.55812e-06
gene-eps8l1	45.3461	6.00616	1.19929	5.00811	5.49684e-07	2.70981e-06
gene-LOC101884245	370.279	6.00527	0.605596	9.9163	3.53629e-23	9.10471e-22
gene-adam19b	134.418	6.00338	0.773727	7.75905	8.55695e-15	1.07121e-13
gene-camkva	30.38	6.0014	1.31833	4.55226	5.30727e-06	2.24394e-05
gene-sema5bb	106.659	6.00063	0.740083	8.10805	5.14407e-16	7.29663e-15
gene-si:ch211-76m11.7-2	29.4081	5.99518	1.47859	4.05467	5.02046e-05	0.000178669
gene-ns:zf-e68	89.0145	5.9945	0.870941	6.88279	5.869e-12	5.51371e-11
gene-dclre1c	14.9569	5.99346	1.88151	3.18546	0.00144523	0.00384039
gene-prox2-2	44.002	5.99342	1.25477	4.77652	1.78353e-06	8.12152e-06
gene-itm2ca	104.629	5.99318	0.756281	7.92454	2.28995e-15	3.03762e-14
gene-tbx19	31.2755	5.99265	1.57579	3.80295	0.000142985	0.000469022
gene-ccdc39	227.939	5.99151	0.561368	10.6731	1.36078e-26	4.45583e-25
gene-poln	501.024	5.98914	0.530494	11.2897	1.47466e-29	5.92173e-28
gene-myf6	14.8613	5.98272	1.91024	3.13192	0.00173668	0.00454086
gene-LOC108190346	15.1942	5.98223	1.85913	3.21776	0.00129195	0.00347412
gene-jac10	15.1942	5.98223	1.85913	3.21776	0.00129195	0.00347412
gene-bcat1	281.252	5.97505	0.520388	11.4819	1.62613e-30	6.98482e-29
gene-LOC101883470	15.1179	5.97272	1.89241	3.15615	0.00159865	0.00420928
gene-si:dkey-90m5.4	137.543	5.97157	0.906175	6.58986	4.40238e-11	3.72027e-10
gene-grin1a	132.767	5.97068	0.672276	8.88129	6.60916e-19	1.21064e-17
gene-lrrc72	60.3108	5.96827	1.06524	5.60274	2.10989e-08	1.28072e-07
gene-rnf32-2	416.264	5.96638	0.567402	10.5153	7.3475e-26	2.2984e-24
gene-abhd2b	14.6896	5.96568	1.87222	3.18642	0.00144045	0.0038305
gene-si:ch211-117c9.5	678.639	5.96157	0.366265	16.2767	1.44569e-59	2.60033e-57
gene-LOC110439934	29.6165	5.96133	1.60465	3.71504	0.00020317	0.000645602
gene-snap25b	28.8165	5.95968	1.40201	4.2508	2.13004e-05	8.11922e-05
gene-si:dkey-166k12.1	29.5211	5.95738	1.45954	4.08169	4.47095e-05	0.000160613
gene-mss51	59.6903	5.95717	0.980104	6.0781	1.21612e-09	8.72054e-09
gene-gsg1l	74.8179	5.95527	0.908564	6.55459	5.57948e-11	4.66325e-10
gene-nexn	28.7401	5.95518	1.39881	4.25731	2.06901e-05	7.90756e-05
gene-pkmb	43.6002	5.94824	1.17931	5.04382	4.56339e-07	2.27607e-06
gene-rgs22	100.212	5.94577	0.823108	7.22356	5.06447e-13	5.3e-12
gene-LOC108183639	28.0624	5.94195	1.80728	3.28778	0.00100979	0.00278152
gene-sstr5	28.4634	5.9412	1.40123	4.23998	2.23542e-05	8.48721e-05
gene-tdh2	43.2854	5.93684	1.13334	5.23835	1.62023e-07	8.62423e-07
gene-rad9b	466.281	5.93521	0.420208	14.1244	2.6852e-45	2.5759e-43
gene-LOC103909333	14.3652	5.93334	1.93591	3.06489	0.00217751	0.00557253
gene-LOC110438467	14.3652	5.93334	1.93591	3.06489	0.00217751	0.00557253
gene-iqcd	379.537	5.93217	0.599864	9.8892	4.63736e-23	1.18688e-21
gene-si:ch211-106n13.3	57.9077	5.9305	1.14138	5.1959	2.03729e-07	1.06991e-06
gene-shha-2	14.6695	5.93019	1.87117	3.16923	0.00152842	0.00403831
gene-fam167ab	58.5455	5.92866	0.987684	6.00259	1.94192e-09	1.34991e-08
gene-si:dkey-204a24.10	57.7832	5.92727	0.968082	6.1227	9.20034e-10	6.68373e-09
gene-LOC100538098	100.716	5.92652	0.777466	7.62287	2.48097e-14	2.97636e-13
gene-LOC101883396	28.844	5.92619	1.36596	4.33848	1.43473e-05	5.63557e-05
gene-gnat2	28.863	5.92607	1.33226	4.44812	8.66268e-06	3.5262e-05
gene-ttyh1	28.0912	5.92522	1.46271	4.05085	5.10323e-05	0.000181365
gene-si:dkey-110c1.7	28.8438	5.92437	1.36278	4.34726	1.37852e-05	5.42711e-05
gene-zgc:109949	144.877	5.9236	0.644294	9.19394	3.78709e-20	7.74798e-19
gene-histh1l	1453.33	5.92325	0.335154	17.6732	6.74644e-70	2.03185e-67
gene-fbn2	649.233	5.91596	0.646994	9.14377	6.03141e-20	1.21194e-18
gene-LOC101882287	14.5455	5.91548	1.96877	3.00466	0.00265877	0.00665681
gene-LOC101885094	43.2941	5.91515	1.12019	5.28048	1.28846e-07	6.96709e-07
gene-LOC100004921-2	84.33	5.91433	0.853986	6.92556	4.34266e-12	4.14594e-11
gene-LOC108190590	72.0327	5.91415	0.927064	6.37944	1.77735e-10	1.4018e-09
gene-LOC108179735	28.5863	5.91197	1.3334	4.43376	9.26034e-06	3.75121e-05
gene-mapk12b	27.8145	5.91074	1.46293	4.04033	5.33754e-05	0.000189095
gene-LOC108192206	14.1363	5.90976	1.8825	3.13932	0.00169338	0.00443841
gene-LOC103909118	14.1171	5.90801	1.95025	3.02937	0.00245068	0.00618847
gene-LOC101885342	43.1606	5.90743	1.22308	4.82997	1.36555e-06	6.32833e-06
gene-LOC108179930	56.9058	5.90546	1.04914	5.62885	1.81417e-08	1.10718e-07
gene-taar20q	42.3409	5.90439	1.12128	5.26576	1.39611e-07	7.51153e-07
gene-cnrip1a	41.4262	5.90301	1.2137	4.86367	1.15231e-06	5.39807e-06
gene-LOC568754	42.2454	5.90199	1.18077	4.99842	5.78008e-07	2.8408e-06
gene-LOC103910933	28.3668	5.90052	1.33825	4.40915	1.03779e-05	4.16288e-05
gene-LOC101885930	964.427	5.90028	0.318167	18.5446	9.01729e-77	3.76704e-74
gene-LOC108190033	56.0288	5.89984	0.984934	5.99009	2.09729e-09	1.45245e-08
gene-ngs	42.1978	5.89941	1.11184	5.30598	1.12068e-07	6.11989e-07
gene-si:zfos-1056e6.1	95.0038	5.8989	1.0281	5.73769	9.59764e-09	6.08838e-08
gene-ubxn11	286.07	5.8986	0.570337	10.3423	4.53471e-25	1.34079e-23
gene-LOC110437833	28.2999	5.89572	1.42417	4.13977	3.47655e-05	0.000127436
gene-LOC103909309	42.6452	5.89283	1.10887	5.31428	1.07078e-07	5.86599e-07
gene-gpr85	14.3164	5.89213	1.90932	3.08598	0.00202885	0.00522723
gene-eef1a1b-2	14.2878	5.88959	1.90204	3.09646	0.00195849	0.00506358
gene-or109-7-3	13.9263	5.88864	1.9952	2.9514	0.00316337	0.00775675
gene-LOC110439743	13.8977	5.88543	1.97961	2.97303	0.00294876	0.00729612
gene-LOC103910100	14.2306	5.88439	1.89105	3.1117	0.00186014	0.00483052
gene-LOC103911264	13.8882	5.88389	1.89016	3.11291	0.00185251	0.00481311
gene-acot12	349.388	5.88366	0.446487	13.1777	1.17968e-39	8.37118e-38
gene-cfap53	465.227	5.88158	0.422042	13.936	3.82756e-44	3.47852e-42
gene-gata3	96.5	5.87685	0.792404	7.41649	1.20267e-13	1.33692e-12
gene-col17a1a	177.215	5.87677	0.772436	7.6081	2.78148e-14	3.32303e-13
gene-LOC110437840	14.1828	5.87571	1.96564	2.9892	0.00279705	0.00696265
gene-ttc9	41.5108	5.87541	1.12161	5.23838	1.61995e-07	8.62423e-07
gene-LOC101885027	27.0608	5.86865	1.42933	4.10587	4.02802e-05	0.000145957
gene-LOC110440198	27.7466	5.86676	1.42314	4.12241	3.74922e-05	0.000136869
gene-LOC110439005	26.8317	5.8652	1.58843	3.69245	0.000222103	0.000699753
gene-si:dkey-109l4.6	14.0397	5.86338	1.91276	3.06541	0.00217375	0.00556512
gene-aqp4	342.493	5.863	0.706463	8.2991	1.04906e-16	1.58399e-15
gene-LOC103908940	26.8508	5.86124	1.50011	3.9072	9.33731e-05	0.000316801
gene-LOC100329490	13.6593	5.86117	1.91375	3.06266	0.00219382	0.0056104
gene-LOC110438775	57.371	5.86031	1.19679	4.8967	9.74572e-07	4.61301e-06
gene-si:ch211-125o16.4-2	27.5944	5.85894	1.90519	3.07525	0.00210323	0.00539844
gene-LOC100149966	82.6771	5.85754	0.82534	7.09713	1.27379e-12	1.28575e-11
gene-ak7b	1099.63	5.85701	0.470806	12.4404	1.57765e-35	8.90252e-34
gene-si:ch211-130h14.4	317.555	5.85666	0.51205	11.4377	2.71118e-30	1.14368e-28
gene-pcyt1bb	13.9253	5.85267	1.89273	3.09218	0.0019869	0.00513036
gene-tdo2a-2	26.7555	5.852	1.42789	4.09834	4.16121e-05	0.000150404
gene-dnaaf2	257.657	5.8426	0.571103	10.2304	1.4493e-24	4.11153e-23
gene-LOC103911047	13.4779	5.84002	1.92523	3.03342	0.00241801	0.00611432
gene-gnb5a	69.446	5.83991	0.982219	5.94563	2.75391e-09	1.87956e-08
gene-fgl2b-2	27.1936	5.83905	1.59021	3.67187	0.000240782	0.000753017
gene-c1qtnf2	40.4519	5.83779	1.11517	5.23486	1.65107e-07	8.77938e-07
gene-si:dkey-37g12.1	175.769	5.83266	0.650434	8.96734	3.03762e-19	5.75969e-18
gene-mybpc3	27.1168	5.83257	1.48203	3.93552	8.30175e-05	0.000283747
gene-si:ch211-146m13.3	26.393	5.832	1.42477	4.09329	4.25298e-05	0.0001534
gene-LOC103909012	27.0693	5.83168	1.35007	4.31955	1.5635e-05	6.10221e-05
gene-apodb	189.476	5.83151	0.560167	10.4103	2.22503e-25	6.71684e-24
gene-hpcal4	27.7266	5.82737	1.43631	4.05717	4.96704e-05	0.000176816
gene-LOC103910728	13.2968	5.82305	1.96162	2.96849	0.00299265	0.0073906
gene-LOC108190435	69.0069	5.82285	1.10974	5.24706	1.54549e-07	8.24845e-07
gene-LOC100536487	13.3062	5.82166	1.90172	3.06126	0.00220404	0.00563264
gene-si:dkey-9i23.14	212.208	5.82139	0.59462	9.79011	1.24167e-22	3.0805e-21
gene-morn5-2	27.5644	5.81932	1.42657	4.07923	4.51852e-05	0.000162097
gene-lgi3	93.5981	5.81907	0.758882	7.66794	1.74777e-14	2.12891e-13
gene-LOC103909193	80.9682	5.81345	0.836387	6.95067	3.63553e-12	3.48755e-11
gene-soga3a	66.5097	5.81337	0.894391	6.49981	8.04236e-11	6.61077e-10
gene-stk33-2	26.6114	5.80778	1.36706	4.24839	2.15315e-05	8.20128e-05
gene-comtb	27.4783	5.8074	1.50815	3.85069	0.000117785	0.000392681
gene-pld4	64.0502	5.80736	1.11901	5.18972	2.10612e-07	1.10359e-06
gene-zymnd12-2	145.095	5.80592	0.647116	8.97199	2.91194e-19	5.53761e-18
gene-nfil3-5	13.4769	5.80477	1.91283	3.03466	0.00240811	0.00609165
gene-LOC110438793	13.4769	5.80477	1.91283	3.03466	0.00240811	0.00609165
gene-atp8b4	1365.01	5.80151	0.300573	19.3015	5.21937e-83	2.93885e-80
gene-pimr146-2	13.1059	5.80118	1.93989	2.99047	0.00278549	0.00693789
gene-si:ch211-278p9.3	26.4206	5.79709	1.35919	4.26511	1.99804e-05	7.66232e-05
gene-zgc:153395	13.0582	5.79411	1.90899	3.03517	0.002404	0.00608305
gene-LOC101885212	52.098	5.79387	0.995051	5.82268	5.79111e-09	3.78585e-08
gene-flrt1b	144.34	5.78937	0.665232	8.70278	3.23851e-18	5.5846e-17
gene-efhc1	1388.76	5.78819	0.344774	16.7884	2.969e-63	6.51696e-61
gene-si:ch211-107e6.5	331.199	5.78802	0.479086	12.0814	1.32473e-33	6.53556e-32
gene-chrna3	39.0779	5.78702	1.12839	5.12855	2.91978e-07	1.49872e-06
gene-efcab6	1909.88	5.78684	0.348833	16.5891	8.35121e-62	1.7167e-59
gene-ano2	26.2295	5.78387	1.46151	3.95746	7.57517e-05	0.000260633
gene-dpysl5a	534.404	5.78331	0.5913	9.78066	1.3632e-22	3.36911e-21
gene-LOC110438194	26.9441	5.7831	1.45122	3.98501	6.74781e-05	0.000234157
gene-gls2b	132.93	5.78254	0.736846	7.8477	4.23739e-15	5.47121e-14
gene-drd4b	12.9437	5.78204	1.91943	3.01237	0.00259218	0.00651277
gene-si:dkey-110c1.7-2	13.2955	5.78167	1.94981	2.96525	0.00302439	0.00746472
gene-cadm3	218.722	5.77984	0.893579	6.46819	9.91806e-11	8.05795e-10
gene-LOC103911363	12.9151	5.77906	1.92587	3.00076	0.00269306	0.00673095
gene-kcnip4	13.2669	5.77899	1.94022	2.97852	0.00289643	0.00717899
gene-mapk11	40.3638	5.77715	1.23483	4.67848	2.89004e-06	1.27499e-05
gene-LOC101884570	54.2511	5.77656	1.21774	4.74369	2.09861e-06	9.45325e-06
gene-LOC110437898	13.2002	5.77391	1.9243	3.00052	0.00269519	0.00673498
gene-LOC555793-2	25.9913	5.77322	1.46218	3.94835	7.86919e-05	0.00026996
gene-cacnb4a	51.992	5.77284	0.980151	5.88975	3.86784e-09	2.58198e-08
gene-sv2bb	129.08	5.77101	0.680337	8.48257	2.20272e-17	3.53706e-16
gene-kif25	13.1811	5.77065	1.91964	3.00611	0.00264613	0.00663031
gene-dnal1	560.854	5.77051	0.413032	13.9711	2.33994e-44	2.14159e-42
gene-p4htm	187.913	5.76603	0.728759	7.91212	2.53037e-15	3.33703e-14
gene-htra3a	38.3722	5.76507	1.28017	4.50337	6.68828e-06	2.78107e-05
gene-LOC101884359	12.7815	5.76291	1.91647	3.00705	0.00263798	0.00661297
gene-muc21	25.8289	5.76246	1.36987	4.20659	2.59252e-05	9.73032e-05
gene-tmem200c	65.5821	5.75941	0.936375	6.15075	7.71192e-10	5.65693e-09
gene-LOC101883356	222.708	5.75889	0.781822	7.36598	1.75846e-13	1.91853e-12
gene-LOC103910375	39.9057	5.75719	1.26858	4.53828	5.67137e-06	2.38814e-05
gene-LOC110438023	25.6858	5.75478	1.35631	4.24296	2.20593e-05	8.38507e-05
gene-flrt1a	38.1427	5.75426	1.30214	4.41908	9.91197e-06	3.99642e-05
gene-LOC103909385	63.6768	5.75415	1.20342	4.78149	1.74001e-06	7.93449e-06
gene-rnf223	13.0285	5.75251	1.99826	2.87876	0.00399241	0.0095721
gene-LOC110438548	36.7125	5.75	1.64982	3.48524	0.0004917	0.00144638
gene-klhl3	113.094	5.74734	0.724126	7.93693	2.0724e-15	2.7555e-14
gene-phospho2	26.2668	5.74727	1.44175	3.98632	6.7105e-05	0.000233081
gene-slc16a8	25.5236	5.74511	1.36701	4.2027	2.63756e-05	9.88501e-05
gene-mical3b-3	126.656	5.74299	0.673601	8.52582	1.51736e-17	2.47022e-16
gene-cfap52-2	673.926	5.73325	0.679593	8.4363	3.27554e-17	5.19215e-16
gene-LOC101885123	12.8377	5.73165	1.9702	2.90917	0.00362395	0.00877315
gene-gpr55a	24.5515	5.72897	1.48237	3.86473	0.000111211	0.000372252
gene-LOC108182487	12.4762	5.72787	1.92671	2.97288	0.00295016	0.0072989
gene-mxc	38.1324	5.72784	1.14185	5.01629	5.26802e-07	2.60494e-06
gene-s100b	37.4561	5.7264	1.15475	4.95901	7.0855e-07	3.42391e-06
gene-LOC100332592	61.9407	5.72619	0.93655	6.11413	9.70852e-10	7.03386e-09
gene-LOC103908954	99.2348	5.72606	0.765432	7.48082	7.38585e-14	8.40145e-13
gene-rasa3	281.385	5.7235	0.55966	10.2267	1.50508e-24	4.2558e-23
gene-camk1ga	50.2742	5.72107	1.11745	5.11973	3.05968e-07	1.56464e-06
gene-npr3-2	63.0262	5.71972	0.891234	6.41775	1.38301e-10	1.10424e-09
gene-si:dkey-271j15.3	37.9224	5.71954	1.13189	5.05308	4.34747e-07	2.17382e-06
gene-si:ch211-222f23.6	61.5399	5.7184	0.973542	5.87381	4.25883e-09	2.82913e-08
gene-adgrf7	37.8557	5.71705	1.14485	4.99369	5.92353e-07	2.90303e-06
gene-cdkn1cb	50.7314	5.71665	1.0144	5.63549	1.74563e-08	1.06838e-07
gene-vsig10l	128.092	5.7163	0.753552	7.58581	3.30408e-14	3.91845e-13
gene-cfap45	564.862	5.71102	0.415488	13.7453	5.4327e-43	4.56858e-41
gene-galnt8a.1	24.9225	5.70938	1.40624	4.06004	4.90633e-05	0.000174799
gene-LOC100007754	36.9791	5.70868	1.19227	4.78808	1.68385e-06	7.69874e-06
gene-neurod1	36.1976	5.70707	1.25083	4.56263	5.05158e-06	2.14212e-05
gene-sstr1a	49.7497	5.70701	1.00186	5.6964	1.22365e-08	7.64995e-08
gene-si:dkey-254e1.1	702.642	5.70553	0.390182	14.6227	2.01125e-48	2.17056e-46
gene-LOC110439533	12.2853	5.70491	1.93256	2.952	0.00315723	0.0077441
gene-gria4a	174.505	5.70346	0.577894	9.86938	5.65119e-23	1.43361e-21
gene-LOC103910035	24.084	5.70193	1.50373	3.79185	0.000149527	0.00048851
gene-col5a3b	294.227	5.69926	0.513533	11.0981	1.281e-28	4.82958e-27
gene-LOC797048	49.4444	5.69803	0.999341	5.70179	1.18557e-08	7.44243e-08
gene-slc26a6l	120.351	5.6894	0.740065	7.68771	1.49793e-14	1.83442e-13
gene-cntnap1	119.967	5.68906	1.55511	3.65829	0.000253901	0.000790611
gene-LOC110438363	12.1423	5.68885	1.94781	2.92064	0.00349314	0.00848661
gene-LOC110440045	12.1517	5.68866	1.96306	2.89786	0.00375722	0.00906682
gene-rltpr	12.4655	5.6865	1.96154	2.89899	0.00374366	0.00903917
gene-LOC103909305	12.4655	5.6865	1.96154	2.89899	0.00374366	0.00903917
gene-zmp:0000000629	12.1231	5.68521	1.95519	2.90776	0.00364029	0.00880694
gene-cdh27	24.5122	5.68454	1.44171	3.94292	8.04951e-05	0.000275817
gene-ttll9	296.568	5.68198	0.500486	11.3529	7.17114e-30	2.93892e-28
gene-si:ch73-173h19.3	605.02	5.68083	0.382363	14.8571	6.25315e-50	7.13492e-48
gene-si:dkeyp-77h1.4	275.983	5.67924	0.891356	6.37146	1.87242e-10	1.47364e-09
gene-wnt4b	12.3701	5.67705	1.96497	2.88913	0.00386308	0.00928588
gene-lect2l	24.3695	5.67645	1.90988	2.97215	0.00295725	0.00731503
gene-si:dkey-11o18.5	187.3	5.67634	0.841112	6.74861	1.49269e-11	1.33349e-10
gene-si:ch211-149a19.3	48.6335	5.67419	0.987254	5.74745	9.05977e-09	5.76553e-08
gene-mtnr1bb	12.3224	5.67128	1.93572	2.92981	0.00339166	0.00825556
gene-cyb5d1	330.103	5.67048	0.467388	12.1323	7.12409e-34	3.5969e-32
gene-foxg1a	82.714	5.66821	0.88343	6.41614	1.39771e-10	1.11494e-09
gene-LOC101885134	12.2652	5.66473	1.93675	2.92486	0.00344612	0.00837868
gene-apbb3	48.2804	5.66316	0.995508	5.68871	1.28e-08	7.98106e-08
gene-LOC110438198	25.2074	5.65742	1.92246	2.94279	0.00325265	0.00795157
gene-pou3f3b	35.6622	5.65325	1.17731	4.80184	1.57214e-06	7.21346e-06
gene-fhdc4	23.978	5.65302	1.38655	4.07705	4.56116e-05	0.000163559
gene-usp28	115.744	5.65201	0.860264	6.57008	5.02869e-11	4.23158e-10
gene-LOC108183497	12.1316	5.64723	1.95222	2.89272	0.0038192	0.00919
gene-LOC101884733	47.8506	5.64668	1.46572	3.8525	0.000116917	0.00038997
gene-LOC101884106	48.308	5.64411	1.01924	5.53759	3.06664e-08	1.81469e-07
gene-si:dkey-33i11.3	311.856	5.64284	0.512461	11.0113	3.37255e-28	1.22514e-26
gene-clec3ba	11.7606	5.64108	1.94938	2.89378	0.00380629	0.00916292
gene-hnrnpd-3	23.1014	5.63967	1.4698	3.83704	0.000124528	0.000413208
gene-zmp:0000000650	71.8851	5.63708	0.863132	6.53095	6.53529e-11	5.4236e-10
gene-LOC110438302	36.7477	5.63619	1.26816	4.4444	8.8139e-06	3.58494e-05
gene-LOC100334962	11.7033	5.6343	1.95066	2.88841	0.00387191	0.00930214
gene-LOC101886526	12.0171	5.63426	1.9443	2.89783	0.00375757	0.00906682
gene-crybb1l3	22.8723	5.62903	1.55712	3.61504	0.000300307	0.000919849
gene-map6a	22.9392	5.62897	1.46881	3.83234	0.000126928	0.000420405
gene-cdk15	57.7715	5.62521	0.949914	5.92181	3.18419e-09	2.1573e-08
gene-prrx1b	23.501	5.6242	1.37396	4.09341	4.25071e-05	0.000153339
gene-LOC103911615	49.4895	5.62169	1.52804	3.67901	0.000234141	0.000734556
gene-hoxb10a	24.12	5.61946	1.46607	3.83301	0.000126584	0.000419533
gene-mmel1	175.808	5.6166	0.555348	10.1137	4.80534e-24	1.32126e-22
gene-nme2a	82.9101	5.61619	0.804829	6.97812	2.99163e-12	2.91302e-11
gene-evpla	107.366	5.61593	1.14796	4.89207	9.97787e-07	4.71514e-06
gene-chchd3b	185.176	5.61278	0.560623	10.0117	1.35408e-23	3.61941e-22
gene-ido1	11.5125	5.60982	1.95906	2.86353	0.00418947	0.00998634
gene-fndc7a	46.5629	5.60852	1.08516	5.16835	2.36163e-07	1.22903e-06
gene-grk5	172.367	5.607	0.596503	9.39979	5.46695e-21	1.21336e-19
gene-akr1b1	22.5861	5.6069	1.48792	3.76827	0.000164383	0.000532744
gene-otpa	22.5575	5.60488	1.48433	3.77604	0.00015934	0.000517306
gene-adora2aa-2	11.769	5.60312	1.95249	2.86972	0.00410829	0.00982303
gene-LOC103909745	22.4622	5.60026	1.49438	3.74756	0.000178564	0.000574034
gene-si:ch211-197h24.8	23.0717	5.59792	1.43996	3.88755	0.000101262	0.000341421
gene-map3k7cl	23.1002	5.59738	1.43316	3.90562	9.39853e-05	0.000318711
gene-LOC108180142	34.955	5.59658	1.19367	4.68856	2.75128e-06	1.21772e-05
gene-pax2a	89.5137	5.59571	0.896922	6.23879	4.40956e-10	3.32205e-09
gene-si:dkey-63d15.12	46.0766	5.59517	1.01457	5.51484	3.49103e-08	2.04712e-07
gene-rasgrf2b	22.3667	5.5931	1.49881	3.73168	0.000190204	0.000607682
gene-dpysl3	489.125	5.59016	0.39371	14.1987	9.3334e-46	9.1918e-44
gene-golga7ba	245.257	5.58751	0.650667	8.58737	8.89859e-18	1.48411e-16
gene-si:dkeyp-46h3.1	124.916	5.58532	0.655899	8.51551	1.65855e-17	2.6832e-16
gene-slc2a2	90.9423	5.58519	0.740599	7.54145	4.64757e-14	5.40533e-13
gene-gng3	22.2044	5.58373	1.52465	3.66231	0.000249955	0.000779167
gene-si:ch211-110e21.3	44.9324	5.58207	1.17468	4.75199	2.01425e-06	9.10013e-06
gene-wu:fk65c09	57.6648	5.58041	1.30443	4.27803	1.88552e-05	7.25765e-05
gene-hkdc1-2	22.7187	5.57502	1.40509	3.96774	7.25563e-05	0.000250504
gene-zgc:165423	22.7282	5.57487	1.38223	4.03324	5.50141e-05	0.000194449
gene-trim46a	22.0327	5.57075	1.49262	3.7322	0.000189811	0.000606502
gene-dub	21.8707	5.56832	1.60875	3.46126	0.00053765	0.00156743
gene-frem3-2	57.6344	5.56644	0.97414	5.71421	1.10217e-08	6.95124e-08
gene-LOC101885280	245.606	5.56364	0.541591	10.2728	9.34838e-25	2.6844e-23
gene-zgc:165507	136.815	5.561	0.672114	8.27389	1.29657e-16	1.94119e-15
gene-LOC110439712	21.7369	5.55382	1.55056	3.58181	0.000341226	0.0010337
gene-pnp6-2	21.4792	5.55162	1.86669	2.97405	0.00293899	0.00727473
gene-hfm1	1210.78	5.55145	0.29852	18.5966	3.42305e-77	1.50272e-74
gene-clrn1	102.489	5.55096	0.96055	5.77894	7.51706e-09	4.83365e-08
gene-ccdc40	134.946	5.54978	0.647177	8.57538	9.87624e-18	1.64293e-16
gene-slc10a1	21.6797	5.54909	1.53438	3.6165	0.000298611	0.000915087
gene-scamp5a	57.1	5.54841	1.03593	5.35595	8.51074e-08	4.73548e-07
gene-tmeff2a	22.9847	5.54749	1.48134	3.74492	0.000180449	0.000579086
gene-ch25hl2	33.7532	5.54496	1.25485	4.41881	9.9244e-06	4.00081e-05
gene-slc5a11	76.4822	5.54308	1.06307	5.21423	1.84581e-07	9.74484e-07
gene-hoxc5a	55.261	5.54128	0.91206	6.07556	1.23552e-09	8.84745e-09
gene-si:ch211-223a21.4	22.2604	5.54121	1.66171	3.33465	0.000854082	0.00239204
gene-LOC103909310	33.5907	5.53952	1.16325	4.76209	1.91596e-06	8.68484e-06
gene-nt5e	87.7851	5.53933	1.04216	5.31522	1.06531e-07	5.83848e-07
gene-masp1	233.831	5.53844	0.621536	8.91089	5.06238e-19	9.37917e-18
gene-zgc:110425	928.74	5.53686	0.314056	17.6301	1.44592e-69	4.25577e-67
gene-zgc:172065	44.216	5.53376	1.00533	5.50444	3.70352e-08	2.16293e-07
gene-lhx3	22.7747	5.53041	1.52025	3.63782	0.000274959	0.000848934
gene-phka1b	22.9272	5.52982	1.6764	3.29864	0.000971551	0.00268532
gene-mst1	56.1748	5.52961	0.968853	5.70738	1.14731e-08	7.21601e-08
gene-syt12	31.9901	5.52778	1.27972	4.31952	1.56366e-05	6.10221e-05
gene-rasgrf2a	54.7171	5.52667	0.930073	5.94219	2.81234e-09	1.91589e-08
gene-zgc:153031	65.3614	5.5258	0.846716	6.52615	6.74801e-11	5.59476e-10
gene-si:ch211-274p24.2	22.6508	5.52546	1.49004	3.70826	0.000208691	0.000661303
gene-LOC101883633	22.7842	5.52461	1.61098	3.42935	0.000605021	0.00174603
gene-pou2f2a	394.421	5.52394	0.565102	9.77511	1.44e-22	3.54201e-21
gene-si:ch211-119e14.9	21.2696	5.52383	1.55258	3.55784	0.000373921	0.00112472
gene-cfap44	468.17	5.5231	0.414599	13.3216	1.73454e-40	1.2947e-38
gene-hey1	129.845	5.52007	0.724415	7.62004	2.53596e-14	3.04092e-13
gene-LOC110439489	22.5363	5.51709	1.5064	3.66242	0.000249839	0.000778897
gene-ucp3	21.8123	5.51464	1.39698	3.94755	7.89538e-05	0.000270751
gene-LOC101886578	73.9741	5.51442	1.07879	5.11169	3.19296e-07	1.62701e-06
gene-aqp12	88.5252	5.50984	0.791382	6.9623	3.34757e-12	3.23286e-11
gene-hoxc6a	42.8241	5.50695	1.03338	5.32909	9.87087e-08	5.43391e-07
gene-tecpr1b	53.9156	5.50495	0.931631	5.90894	3.44322e-09	2.31824e-08
gene-LOC110438466	65.017	5.50478	0.853459	6.44997	1.11875e-10	9.02985e-10
gene-LOC103910383	32.7988	5.5025	1.20103	4.58148	4.61699e-06	1.97074e-05
gene-gdpd4a	140.363	5.50225	0.59274	9.28274	1.65179e-20	3.50969e-19
gene-abch1-2	54.3821	5.50171	0.915779	6.00768	1.88197e-09	1.31176e-08
gene-LOC108183408	32.1322	5.50093	1.17251	4.69159	2.71091e-06	1.20129e-05
gene-LOC100332770	86.4093	5.49956	0.733997	7.49262	6.75141e-14	7.72386e-13
gene-LOC100536913	55.0298	5.49873	0.970039	5.66857	1.43993e-08	8.9331e-08
gene-synm-3	213.154	5.49831	0.641756	8.5676	1.05667e-17	1.75216e-16
gene-pimr67	87.9625	5.49728	0.847115	6.48941	8.61707e-11	7.063e-10
gene-si:dkey-237h12.3-2	72.0867	5.49617	1.0649	5.16122	2.45344e-07	1.27362e-06
gene-LOC101882071	53.5247	5.4954	0.935949	5.87147	4.31945e-09	2.8672e-08
gene-LOC110439582	42.4519	5.49493	1.06895	5.14047	2.74046e-07	1.41311e-06
gene-LOC108179658-2	41.4417	5.49116	1.18957	4.61608	3.91055e-06	1.69009e-05
gene-ahrrb-3	20.8402	5.48979	1.50218	3.65456	0.000257621	0.000800366
gene-si:ch211-168d1.3	84.9697	5.48529	0.743618	7.37649	1.6252e-13	1.78139e-12
gene-LOC100538089	85.4265	5.48235	0.742377	7.38485	1.52624e-13	1.67932e-12
gene-epn3b	179.429	5.48085	0.59605	9.19529	3.73975e-20	7.65718e-19
gene-ect2l	86.0548	5.4778	0.845968	6.47519	9.46945e-11	7.71769e-10
gene-ptn	116.624	5.47584	0.64155	8.53533	1.39752e-17	2.29532e-16
gene-slc24a2	122.349	5.47277	0.853087	6.41526	1.40586e-10	1.12075e-09
gene-LOC103909344	73.8382	5.4714	1.04878	5.21694	1.81905e-07	9.60949e-07
gene-r3hdml	32.0072	5.46446	1.33073	4.10636	4.01946e-05	0.000145748
gene-ntrk2b	62.5277	5.46085	0.87026	6.27496	3.49723e-10	2.6736e-09
gene-nefma	41.431	5.4594	1.07931	5.05822	4.23195e-07	2.11974e-06
gene-helz2	168.135	5.45786	0.656426	8.31452	9.21234e-17	1.39864e-15
gene-LOC101885607	40.4972	5.45705	1.18559	4.60283	4.16785e-06	1.79173e-05
gene-si:dkey-233e3.2	21.6393	5.45496	1.52232	3.58332	0.000339259	0.00102822
gene-si:rp71-56i13.6-2	79.2869	5.44837	1.12793	4.8304	1.36259e-06	6.31574e-06
gene-kcnab1b	21.5632	5.44773	1.57398	3.46113	0.000537916	0.00156792
gene-myb	20.8486	5.44765	1.40398	3.88014	0.000104397	0.000351259
gene-dytn	118.775	5.44618	0.965504	5.64077	1.69295e-08	1.0376e-07
gene-cep89	743.394	5.44565	0.363237	14.992	8.28194e-51	1.00709e-48
gene-kcnj1a.6	20.2104	5.44555	1.52634	3.5677	0.000360122	0.001087
gene-si:ch73-54f23.4	20.1818	5.44332	1.5226	3.57502	0.000350208	0.00105863
gene-adm2b	41.43	5.43746	1.02248	5.31789	1.04976e-07	5.75936e-07
gene-LOC795051	123.357	5.43651	0.799828	6.7971	1.06748e-11	9.73204e-11
gene-LOC100331149	52.0445	5.43584	0.937601	5.79761	6.72679e-09	4.3525e-08
gene-LOC101884966	134.171	5.43577	0.598286	9.08557	1.03159e-19	2.03652e-18
gene-LOC101887113	105.023	5.43421	0.7585	7.16442	7.81171e-13	8.01629e-12
gene-hoxd4a	19.9718	5.43261	1.6178	3.35803	0.000784998	0.00221387
gene-grk7b	20.5814	5.42748	1.43058	3.79389	0.000148303	0.000484816
gene-LOC101886905	32.0344	5.42689	1.35215	4.01352	5.98204e-05	0.000209626
gene-cpe-2	31.0528	5.42244	1.18972	4.55777	5.17004e-06	2.18949e-05
gene-lrrc34	267.238	5.42102	0.764831	7.08787	1.36192e-12	1.36937e-11
gene-myha	51.5292	5.41999	0.968111	5.59852	2.16186e-08	1.3092e-07
gene-oscp1a	19.8479	5.41887	1.52169	3.56109	0.000369317	0.0011119
gene-c20h2orf81	70.615	5.41808	0.828498	6.53964	6.1665e-11	5.1274e-10
gene-LOC108190384	30.8717	5.41497	1.18581	4.56647	4.96003e-06	2.10468e-05
gene-shox	40.8573	5.41473	1.21408	4.45993	8.19862e-06	3.35417e-05
gene-LOC101882092	39.1136	5.41381	1.31675	4.11149	3.93108e-05	0.000142884
gene-si:ch211-217k17.9	40.7432	5.41368	1.05529	5.13003	2.89699e-07	1.4882e-06
gene-prokr1a	70.9477	5.41147	0.858436	6.30387	2.90299e-10	2.23515e-09
gene-LOC100148433	28.9462	5.408	1.85575	2.91418	0.0035662	0.00865033
gene-b3gnt7	120.266	5.40604	0.691895	7.81338	5.56725e-15	7.10682e-14
gene-LOC100332737	20.2189	5.40165	1.41935	3.80573	0.000141388	0.000464083
gene-fam155a	20.8951	5.40156	1.54532	3.49544	0.000473284	0.0013965
gene-lrrc58a	30.4233	5.39269	1.21586	4.4353	9.19444e-06	3.72801e-05
gene-ccdc24	146.895	5.3918	0.682219	7.90332	2.71561e-15	3.5686e-14
gene-si:dkey-32n7.7	30.4612	5.38993	1.29301	4.16851	3.06594e-05	0.000113574
gene-zgc:158328	29.7658	5.38958	1.34128	4.01823	5.86379e-05	0.000205936
gene-bcl11ba	58.6646	5.38782	0.978797	5.50453	3.70152e-08	2.16271e-07
gene-foxd3	19.9613	5.38374	1.42272	3.78412	0.000154251	0.00050217
gene-LOC108183587	28.9369	5.38339	1.34081	4.01503	5.94394e-05	0.000208412
gene-LOC103911899	39.8942	5.38211	1.18725	4.53325	5.80841e-06	2.44068e-05
gene-klhl41a	50.9557	5.38163	1.01796	5.28669	1.24552e-07	6.75183e-07
gene-grapb	70.2786	5.38163	0.911392	5.90485	3.52964e-09	2.3715e-08
gene-abcc2	19.1611	5.38071	1.74885	3.07671	0.00209299	0.00537428
gene-LOC110438103	19.9706	5.38035	1.8461	2.91445	0.0035632	0.00864385
gene-tm7sf2-2	304.145	5.37645	0.8054	6.67551	2.46373e-11	2.14354e-10
gene-LOC100329258	19.2467	5.37541	1.56394	3.4371	0.000587978	0.0017014
gene-LOC108191292	19.8277	5.37333	1.41677	3.79266	0.00014904	0.000487102
gene-dnase2b	20.4467	5.37129	1.52625	3.51928	0.000432721	0.00128615
gene-LOC101886199	28.3362	5.37101	1.65787	3.23969	0.00119658	0.00324326
gene-LOC103908810	19.0654	5.36922	1.72173	3.1185	0.00181774	0.00473274
gene-si:dkey-74k8.4	544.422	5.3666	1.51129	3.551	0.000383768	0.00115113
gene-LOC100333826	127.903	5.3651	0.603361	8.89204	5.99994e-19	1.10451e-17
gene-ccl19a.1	149.874	5.36335	0.63871	8.39716	4.57402e-17	7.13685e-16
gene-LOC108190986	84.1586	5.36324	1.08079	4.96235	6.96469e-07	3.36993e-06
gene-klf1	19.0559	5.36199	1.58997	3.37239	0.000745187	0.00211172
gene-nadl1.2	19.0273	5.35935	1.58125	3.38931	0.000700691	0.00199875
gene-metrn-2	89.6756	5.35509	0.920565	5.81718	5.98498e-09	3.90275e-08
gene-LOC100535592	93.4226	5.35506	1.16168	4.60974	4.03171e-06	1.73868e-05
gene-si:dkey-262k9.2	68.096	5.35452	1.32974	4.02674	5.65566e-05	0.000199248
gene-LOC101885828	70.7255	5.35186	1.03023	5.19482	2.04916e-07	1.0757e-06
gene-gata1b	28.9837	5.34939	1.19895	4.46174	8.12984e-06	3.33077e-05
gene-LOC108180722	28.1736	5.34876	1.4254	3.75246	0.000175108	0.000563832
gene-tmem37	38.3111	5.34471	1.10514	4.83622	1.32333e-06	6.14366e-06
gene-LOC797378	19.4176	5.34309	1.63458	3.26878	0.00108014	0.00295643
gene-LOC110438024	28.126	5.34082	1.32395	4.03402	5.48318e-05	0.000193884
gene-LOC110437982	38.7965	5.33907	1.11081	4.80645	1.53631e-06	7.06159e-06
gene-LOC101883505	20.1318	5.33823	1.66866	3.19912	0.0013785	0.00368391
gene-LOC101886663	28.0496	5.33733	1.3373	3.99113	6.57582e-05	0.000228758
gene-LOC110439623	49.7724	5.33693	1.19805	4.45467	8.40215e-06	3.43093e-05
gene-poln-2	206.865	5.3347	0.687198	7.76298	8.2957e-15	1.04052e-13
gene-tp53inp2	639.884	5.33389	0.359441	14.8394	8.14759e-50	9.21532e-48
gene-LOC101887046	28.6973	5.33368	1.21065	4.40564	1.05474e-05	4.22564e-05
gene-ripply2	46.3233	5.33324	1.15691	4.60989	4.02879e-06	1.73771e-05
gene-zgc:153219-2	19.9411	5.33319	1.55222	3.43585	0.000590701	0.00170832
gene-alx4a	47.962	5.3327	1.002	5.32207	1.02594e-07	5.63819e-07
gene-fam83fb	18.6934	5.33266	1.56872	3.39937	0.000675406	0.00193236
gene-pcdh19	95.2003	5.33205	0.704308	7.57061	3.71462e-14	4.38325e-13
gene-zgc:163061	1264.46	5.32938	0.374099	14.2459	4.75468e-46	4.73658e-44
gene-triobpa	94.9141	5.32789	0.706954	7.53641	4.8309e-14	5.611e-13
gene-si:ch211-209j10.6	76.9254	5.32716	0.765297	6.96091	3.38077e-12	3.2625e-11
gene-epx	48.7615	5.3165	1.03751	5.12428	2.9867e-07	1.52931e-06
gene-vwa11	105.611	5.30749	0.750477	7.07215	1.52548e-12	1.5279e-11
gene-si:dkey-81j8.6	38.5664	5.3008	1.21594	4.35941	1.30413e-05	5.1499e-05
gene-si:ch211-209f23.6	37.7186	5.29924	1.03645	5.11286	3.17312e-07	1.61913e-06
gene-LOC110440100	37.1282	5.29798	1.06719	4.96442	6.89081e-07	3.34043e-06
gene-dnah9l	200.407	5.29631	0.649596	8.15324	3.54315e-16	5.10691e-15
gene-si:ch211-281g13.4	55.8967	5.29573	0.885732	5.97893	2.24609e-09	1.55177e-08
gene-si:ch211-250g4.3	317.154	5.29558	0.427778	12.3793	3.38364e-35	1.86467e-33
gene-LOC100150280	63.7656	5.28827	0.942772	5.60928	2.03173e-08	1.23588e-07
gene-skor1a	82.5821	5.28705	0.77666	6.80742	9.93663e-12	9.08467e-11
gene-LOC110437770	35.3264	5.28511	1.77855	2.97158	0.0029627	0.00732711
gene-kcnj14	18.6637	5.28426	1.44046	3.66846	0.000244015	0.000762483
gene-b3gat1b	28.2954	5.28309	1.23466	4.27899	1.8774e-05	7.22965e-05
gene-LOC103909379	55.3145	5.28229	0.98403	5.36801	7.96088e-08	4.44679e-07
gene-eef2l2-2	156.782	5.28013	1.13765	4.64125	3.46306e-06	1.50776e-05
gene-myhz1.1	18.0255	5.27881	1.55928	3.38541	0.000710717	0.002024
gene-LOC101882238	17.9875	5.27858	1.59174	3.31624	0.000912366	0.00253962
gene-h2afy2	1291.05	5.27639	0.383364	13.7634	4.23134e-43	3.59331e-41
gene-slc16a12a-2	27.5906	5.27567	1.21256	4.35085	1.35612e-05	5.34464e-05
gene-fam117ba	27.5619	5.27414	1.20931	4.36126	1.29314e-05	5.11197e-05
gene-si:ch211-14k19.8-2	206.851	5.26827	0.580652	9.07302	1.15759e-19	2.27659e-18
gene-LOC108179942-2	26.6471	5.26448	1.38912	3.78978	0.000150779	0.000491731
gene-LOC110439937	74.2626	5.26356	0.773667	6.80339	1.02183e-11	9.32898e-11
gene-ptpn5	27.9043	5.26335	1.21681	4.32552	1.52172e-05	5.9502e-05
gene-asb2a.2	17.768	5.25998	1.58589	3.31674	0.000910734	0.0025359
gene-tnni3k	18.9775	5.25913	1.55974	3.37179	0.000746815	0.00211563
gene-LOC101885829	979.577	5.25852	0.415792	12.647	1.16231e-36	7.00113e-35
gene-gad1b	72.7953	5.2573	0.771284	6.81631	9.34117e-12	8.56445e-11
gene-pimr175	18.3488	5.25681	1.50377	3.49576	0.000472716	0.00139499
gene-si:ch211-176g6.2	45.415	5.2547	1.06502	4.9339	8.06023e-07	3.85969e-06
gene-LOC103909422	64.2492	5.25229	0.827504	6.34715	2.19342e-10	1.71378e-09
gene-ankrd29-2	17.6249	5.25126	1.63731	3.20725	0.00134009	0.00359201
gene-si:ch211-51a19.5	111.884	5.25078	0.997015	5.2665	1.3905e-07	7.48448e-07
gene-pimr62	18.1962	5.24646	1.4421	3.63808	0.000274682	0.000848181
gene-acy3.2	108.606	5.24572	0.666695	7.86825	3.59624e-15	4.67601e-14
gene-comtb-2	18.7866	5.24403	1.55833	3.36516	0.000764983	0.00216261
gene-slc27a4	26.2845	5.2434	1.37341	3.81779	0.000134654	0.000443895
gene-sema3bl-2	192.747	5.23938	0.652333	8.03177	9.60786e-16	1.32158e-14
gene-slc6a14	17.5199	5.23931	1.58883	3.29758	0.000975203	0.00269426
gene-LOC103909331	54.8738	5.23774	0.89144	5.87559	4.2133e-09	2.80176e-08
gene-neurod2	28.3134	5.23642	1.46464	3.57524	0.000349909	0.0010579
gene-pak7	80.3099	5.23496	0.829668	6.30971	2.79562e-10	2.15568e-09
gene-si:ch73-287m6.1	145.717	5.23288	0.920566	5.68442	1.31258e-08	8.16847e-08
gene-hnrnpa3	324.959	5.23101	0.613376	8.52822	1.48617e-17	2.42255e-16
gene-tex47	26.7605	5.23061	1.21513	4.30455	1.67325e-05	6.48785e-05
gene-lyrm5b	17.348	5.22845	1.69554	3.08365	0.00204475	0.00526453
gene-mxa	71.2783	5.2262	0.777476	6.72202	1.79225e-11	1.58434e-10
gene-spdef	61.9422	5.22528	0.852049	6.1326	8.64561e-10	6.30078e-09
gene-LOC103911999	18.5767	5.22316	1.60858	3.24705	0.00116606	0.00316884
gene-LOC110437788	26.5602	5.2199	1.20722	4.32391	1.53286e-05	5.99104e-05
gene-si:ch211-25d12.7	17.8623	5.21929	1.45555	3.5858	0.00033605	0.00101957
gene-LOC101885859	27.1123	5.21815	1.27861	4.0811	4.48222e-05	0.000160948
gene-sult2st3	148.315	5.21769	1.46787	3.5546	0.000378553	0.00113759
gene-gpr132a	17.824	5.21373	1.51469	3.44212	0.000577168	0.00167273
gene-LOC110440144	17.2241	5.21254	1.57617	3.30709	0.000942712	0.00261654
gene-mmp28	97.5513	5.21221	0.66312	7.86012	3.83762e-15	4.97488e-14
gene-cldn18	17.1669	5.20782	1.57587	3.30472	0.000950707	0.00263636
gene-hhipl1	70.8765	5.20579	0.777583	6.69484	2.15914e-11	1.89252e-10
gene-jcada	17.1191	5.20461	1.60612	3.24048	0.00119327	0.00323462
gene-si:dkey-192j17.1	35.9239	5.20218	1.11215	4.67758	2.90285e-06	1.27912e-05
gene-LOC108192159	26.2263	5.20151	1.21321	4.28738	1.80789e-05	6.97856e-05
gene-LOC110437888	34.5326	5.2013	1.47978	3.51491	0.000439902	0.00130514
gene-p2ry8	17.6523	5.20024	1.46714	3.54447	0.00039341	0.00117759
gene-apobb.2	61.4354	5.19858	0.852908	6.09512	1.09357e-09	7.8767e-09
gene-rab6bb	35.2379	5.19813	1.04868	4.95682	7.16572e-07	3.46074e-06
gene-glipr1b	43.0399	5.19673	1.10201	4.71566	2.40924e-06	1.07715e-05
gene-LOC110439819	43.0782	5.19471	1.01947	5.09548	3.4786e-07	1.76113e-06
gene-crabp2a	17.5667	5.1945	1.72869	3.00488	0.00265686	0.00665398
gene-LOC103909721	26.5781	5.19084	1.22774	4.22797	2.35806e-05	8.91494e-05
gene-LOC101883139	215.874	5.19001	0.532644	9.74386	1.9597e-22	4.77499e-21
gene-dnah2	3548.73	5.18989	0.468574	11.0759	1.64158e-28	6.12661e-27
gene-LOC103910704	34.39	5.18595	1.09602	4.73163	2.2272e-06	9.99941e-06
gene-LOC100535984	18.1377	5.18479	1.65271	3.13715	0.001706	0.0044674
gene-dcakd	43.163	5.17673	0.955802	5.41611	6.09092e-08	3.45967e-07
gene-si:rp71-7l19.2	17.347	5.17457	1.46446	3.53343	0.000410202	0.00122418
gene-si:ch211-153j24.3	16.7088	5.17116	1.65864	3.11771	0.00182259	0.00474346
gene-ccdc40-2	155.056	5.16982	0.558856	9.25073	2.22969e-20	4.66488e-19
gene-sema3c	60.6813	5.16204	1.14671	4.50163	6.74357e-06	2.80227e-05
gene-hmgn3	75.3782	5.16068	0.980788	5.26177	1.42677e-07	7.66379e-07
gene-sdhda	66.4526	5.15995	0.984652	5.24038	1.60243e-07	8.53476e-07
gene-slc4a3	179.974	5.15869	0.526375	9.80041	1.1213e-22	2.7899e-21
gene-zgc:77938	41.8856	5.15296	1.01297	5.08699	3.63784e-07	1.83887e-06
gene-LOC101885299	16.4894	5.15287	1.68596	3.05635	0.00224051	0.00571571
gene-LOC555645	58.6027	5.1472	0.983051	5.23595	1.64142e-07	8.73167e-07
gene-ank3b	1314.95	5.14671	0.336711	15.2852	9.59088e-53	1.24207e-50
gene-kif17	659.807	5.14659	0.650034	7.9174	2.42521e-15	3.20486e-14
gene-elmod1	371.108	5.14433	0.495883	10.3741	3.25294e-25	9.69555e-24
gene-LOC110438164	16.9559	5.1414	1.45984	3.52188	0.000428491	0.00127435
gene-LOC103910872	32.4731	5.13888	1.31868	3.89699	9.73939e-05	0.000329321
gene-eps8l1-2	64.2311	5.13812	1.15057	4.46573	7.9798e-06	3.27551e-05
gene-atp1b3a	76.9102	5.13404	0.775623	6.61924	3.61042e-11	3.07712e-10
gene-si:ch211-199m3.1	25.586	5.13375	1.30665	3.92894	8.53215e-05	0.000291314
gene-ldlrad2	25.5383	5.13227	1.25258	4.09735	4.17901e-05	0.00015098
gene-otol1b	16.8509	5.1313	1.47837	3.47091	0.000518696	0.00151736
gene-c15h3orf80	49.3337	5.1308	0.957932	5.35613	8.50257e-08	4.73195e-07
gene-LOC799681	16.8698	5.13047	1.78324	2.87705	0.00401415	0.00961621
gene-LOC110437763	17.4127	5.12755	1.60664	3.19148	0.00141548	0.00377184
gene-LOC100333723	24.195	5.12698	1.48928	3.44259	0.000576176	0.00167005
gene-c3a.3	83.1775	5.12219	0.706918	7.2458	4.29891e-13	4.54474e-12
gene-LOC101884710	41.5793	5.12186	0.962056	5.32387	1.01584e-07	5.58628e-07
gene-ush1ga	49.4183	5.11463	0.952696	5.36859	7.93554e-08	4.43449e-07
gene-LOC108181087	24.0616	5.11436	1.39011	3.67912	0.000234042	0.000734421
gene-LOC101882875	26.0713	5.11428	1.46174	3.49877	0.000467411	0.00138122
gene-LOC103909138	16.6123	5.10859	1.5917	3.20953	0.00132953	0.00356851
gene-phf19	969.246	5.10782	0.556173	9.18389	4.15812e-20	8.4603e-19
gene-LOC110438150	16.5361	5.10488	1.48239	3.44368	0.00057386	0.00166389
gene-si:dkey-6f10.3	25.8712	5.10294	1.48645	3.43297	0.000597011	0.00172445
gene-LOC100537816	15.9551	5.10097	1.61196	3.16445	0.00155379	0.00410116
gene-tcirg1a	189.592	5.10059	0.519516	9.81797	9.42174e-23	2.36465e-21
gene-cdk20	271.939	5.09937	0.443404	11.5005	1.31117e-30	5.66957e-29
gene-obscnb	529.856	5.0986	0.569905	8.9464	3.67261e-19	6.91309e-18
gene-LOC110439817	48.2556	5.0983	0.96221	5.29854	1.16735e-07	6.36104e-07
gene-si:dkeyp-27e10.3	40.9016	5.09774	1.11885	4.55622	5.2082e-06	2.20493e-05
gene-si:ch211-210p4.6	271.68	5.09681	0.579453	8.79589	1.41913e-18	2.53147e-17
gene-pcdh18b	24.9085	5.09533	1.2364	4.12111	3.77055e-05	0.00013757
gene-foxn4	151.129	5.09448	0.654013	7.78957	6.72388e-15	8.4871e-14
gene-LOC100005637	17.0596	5.09263	1.67252	3.04489	0.00232763	0.00591232
gene-khdrbs3	114.342	5.09263	0.606073	8.40267	4.36437e-17	6.82618e-16
gene-bscl2l	24.2419	5.09017	1.43419	3.54916	0.000386457	0.00115852
gene-col17a1b	106.073	5.08841	0.687615	7.40009	1.36097e-13	1.5045e-12
gene-alcamb	458.136	5.08832	0.627526	8.10854	5.123e-16	7.27073e-15
gene-tuba2	232.187	5.08599	0.537137	9.4687	2.83346e-21	6.39839e-20
gene-LOC101885981	24.2417	5.08482	1.23012	4.13359	3.57147e-05	0.00013073
gene-grid2ipa	50.636	5.08215	1.21243	4.19171	2.76865e-05	0.000103285
gene-olfml3b	49.6647	5.08204	1.12908	4.50106	6.76165e-06	2.80882e-05
gene-LOC110439426	16.8785	5.08197	1.61035	3.15582	0.00160049	0.00421368
gene-bmper	48.3404	5.08152	0.899925	5.6466	1.63649e-08	1.00561e-07
gene-LOC110438072	89.9172	5.08095	0.70388	7.21848	5.25708e-13	5.48605e-12
gene-b3galt4	16.8593	5.07911	1.61503	3.14491	0.00166137	0.00436156
gene-col15a1b	33.2239	5.07884	1.29662	3.917	8.96581e-05	0.000304995
gene-thbs2a	131.361	5.07816	0.604863	8.39556	4.63668e-17	7.22592e-16
gene-cyb561	24.1176	5.07732	1.29353	3.92517	8.66692e-05	0.000295527
gene-cldn19	25.3748	5.0762	1.43106	3.54717	0.000389391	0.00116651
gene-p4ha2	217.591	5.07565	0.481733	10.5362	5.88135e-26	1.8487e-24
gene-LOC100538248	32.4614	5.07515	1.10274	4.6023	4.17842e-06	1.79568e-05
gene-trpc1	91.6697	5.07003	0.839781	6.03732	1.56694e-09	1.10196e-08
gene-LOC101882900	39.5194	5.06846	1.05795	4.79085	1.66079e-06	7.60543e-06
gene-si:ch211-39k3.2	82.9251	5.06825	0.829312	6.1114	9.87622e-10	7.14935e-09
gene-LOC108190381	16.7257	5.06451	1.65385	3.06226	0.00219675	0.00561679
gene-si:ch211-1o7.2	202.253	5.06311	0.51193	9.89024	4.58913e-23	1.17686e-21
gene-zgc:92789	578.384	5.06001	0.489746	10.3319	5.05415e-25	1.48758e-23
gene-si:ch211-120k19.1	16.6399	5.05854	1.63017	3.10307	0.00191524	0.00496214
gene-wu:fb59d01	245.849	5.05727	0.572757	8.8297	1.04954e-18	1.8904e-17
gene-elavl4	151.903	5.05625	0.533647	9.4749	2.67013e-21	6.03482e-20
gene-casp7	318.445	5.05611	0.453565	11.1475	7.36677e-29	2.81426e-27
gene-LOC101884238	49.7963	5.05137	1.37465	3.67465	0.000238175	0.000745494
gene-abcg2d	39.6517	5.05132	1.07974	4.67829	2.89278e-06	1.27598e-05
gene-gfap	15.9064	5.04642	1.47858	3.41302	0.000642478	0.0018459
gene-rsad2	16.5351	5.04404	1.7543	2.87525	0.0040371	0.00966584
gene-LOC100008366	272.751	5.04389	0.499936	10.0891	6.17473e-24	1.68527e-22
gene-chd5	283.144	5.04333	0.554872	9.08918	9.97899e-20	1.97302e-18
gene-zgc:77375	216.26	5.04108	0.57704	8.73611	2.41281e-18	4.21403e-17
gene-LOC110438630	54.9763	5.03425	0.830448	6.06209	1.3436e-09	9.56588e-09
gene-LOC569340	71.225	5.03296	0.74555	6.75067	1.47167e-11	1.31576e-10
gene-LOC796940	24.0019	5.03202	1.45236	3.46473	0.000530769	0.00154918
gene-zgc:92275	31.0028	5.03191	1.10643	4.54788	5.41885e-06	2.28775e-05
gene-si:dkey-83m22.7	23.8685	5.03074	1.2464	4.03621	5.43206e-05	0.000192207
gene-ndel1a	920.287	5.02922	0.30002	16.763	4.55303e-63	9.82734e-61
gene-si:ch211-197n1.2	54.7379	5.02862	0.859847	5.84828	4.96686e-09	3.27096e-08
gene-LOC100537855	15.1059	5.02353	1.69781	2.95884	0.00308803	0.00759862
gene-ky-3	15.6488	5.0232	1.52977	3.28362	0.00102483	0.00281934
gene-anxa6	102.036	5.0218	0.672168	7.47105	7.95546e-14	9.01375e-13
gene-LOC103910397	16.2582	5.01996	1.6916	2.96758	0.0030015	0.00741104
gene-LOC103910906	15.0679	5.01745	1.6303	3.07763	0.00208656	0.00535991
gene-xrra1	418.046	5.0173	0.397335	12.6274	1.49172e-36	8.94375e-35
gene-si:dkeyp-10a3.2	31.7162	5.0158	1.12063	4.47586	7.61046e-06	3.13185e-05
gene-mtnr1c	22.4968	5.0156	1.41849	3.53586	0.000406444	0.00121352
gene-slc6a9	360.233	5.01218	0.414506	12.0919	1.16497e-33	5.80267e-32
gene-arhgef3	335.298	5.01062	0.899944	5.5677	2.58125e-08	1.5444e-07
gene-itih3a	15.5152	5.01002	1.49782	3.34487	0.000823202	0.00231105
gene-iffo2b	96.2699	5.00958	0.989217	5.06419	4.10137e-07	2.05831e-06
gene-si:ch211-256a21.4	23.03	5.00865	1.2484	4.01207	6.01881e-05	0.000210781
gene-mdm1	262.548	5.0083	0.427813	11.7068	1.17698e-31	5.33886e-30
gene-LOC110437997	30.5067	5.00803	1.11094	4.50793	6.54632e-06	2.72677e-05
gene-LOC103909980	47.2406	5.00791	1.05117	4.76415	1.89651e-06	8.60271e-06
gene-plp2	338.608	5.00481	0.441267	11.3419	8.13666e-30	3.31364e-28
gene-zmynd10-3	29.6015	5.00285	1.3242	3.778	0.00015809	0.000513633
gene-zgc:101540	85.0993	5.00007	0.695368	7.19055	6.45323e-13	6.6858e-12
gene-LOC101883465	22.7727	4.9995	1.59065	3.14306	0.00167192	0.00438614
gene-camk2d1	15.3816	4.99649	1.4886	3.35649	0.000789378	0.00222502
gene-ctnnd2b	121.701	4.9956	0.677271	7.37607	1.63032e-13	1.78625e-12
gene-xdh	99.0133	4.99471	0.735604	6.78995	1.12176e-11	1.01875e-10
gene-LOC108183338	14.8006	4.99286	1.6891	2.95593	0.00311724	0.00766249
gene-top1	62.6023	4.99186	0.860844	5.7988	6.67895e-09	4.32479e-08
gene-LOC103910369	45.4589	4.9903	0.933896	5.34353	9.11562e-08	5.03849e-07
gene-msh4	724.611	4.98841	0.528874	9.43213	4.01826e-21	9.0032e-20
gene-col10a1b	127.595	4.98607	1.24885	3.99253	6.53731e-05	0.000227523
gene-si:ch211-59d15.4	15.2766	4.9853	1.50941	3.30281	0.000957205	0.00265218
gene-si:dkey-100n19.2	62.6696	4.98452	1.07356	4.64297	3.43433e-06	1.49651e-05
gene-itih5	30.525	4.984	1.47116	3.38781	0.00070454	0.00200773
gene-LOC110439102	15.2099	4.98061	1.5141	3.28948	0.00100374	0.00276779
gene-meig1-2	44.3626	4.97926	1.09512	4.54679	5.4471e-06	2.2993e-05
gene-neb	21.9434	4.97906	1.42552	3.4928	0.000477987	0.00140878
gene-majin	35.9717	4.97794	1.50835	3.30026	0.000965949	0.00267383
gene-LOC100331349	327.12	4.97774	0.731354	6.80619	1.00215e-11	9.15575e-11
gene-cfap73	66.8584	4.97751	0.855163	5.82054	5.86593e-09	3.828e-08
gene-LOC100150591	22.4956	4.97536	1.4035	3.54495	0.000392681	0.00117568
gene-LOC101882371	60.1249	4.97421	0.816443	6.09254	1.11135e-09	7.99588e-09
gene-LOC799924	106.173	4.97356	0.683945	7.27187	3.54538e-13	3.77275e-12
gene-tfap2c	48.2315	4.96993	1.60517	3.09621	0.00196009	0.0050672
gene-gpr153	15.6859	4.96898	1.6846	2.94966	0.00318127	0.00779768
gene-si:ch211-256m1.8	43.9338	4.96868	1.14134	4.35338	1.34052e-05	5.28556e-05
gene-ewsr1a	22.3813	4.9682	1.28426	3.86853	0.000109493	0.00036698
gene-tuft1a-2	23.6385	4.96805	1.49536	3.32231	0.000892757	0.00248986
gene-LOC101884705	15.0858	4.9661	1.53433	3.23665	0.00120942	0.00327328
gene-palmda	22.8573	4.96598	1.30519	3.80479	0.000141923	0.000465782
gene-acot15	29.5428	4.96586	1.32949	3.73517	0.000187588	0.000600136
gene-LOC103908836	51.0187	4.96402	1.07254	4.6283	3.68674e-06	1.60057e-05
gene-LOC101884805	37.381	4.96348	1.05989	4.68301	2.82695e-06	1.24886e-05
gene-cyp8b3	38.0007	4.96148	1.42677	3.47743	0.000506236	0.00148544
gene-aspn	15.0285	4.96079	1.51834	3.26725	0.00108597	0.0029702
gene-si:ch211-255g12.8	139.287	4.95966	0.73961	6.70577	2.00344e-11	1.76201e-10
gene-LOC108181448	22.2666	4.95897	1.31741	3.76418	0.000167099	0.000540397
[truncated: 2,577 more rows]

## Sheet: GSE142355_Ovary-upregulated
gene_id	baseMean	log2FoldChange	lfcSE	stat	pvalue	padj
gene-zgc:173544-2	376.648	-25.3859	4.78487	-5.30546	1.12389e-07	1.38006e-06
gene-LOC100332505	8073.72	-14.9169	1.36095	-10.9607	5.90704e-28	1.33972e-25
gene-zgc:173544	2294.09	-14.3919	1.62373	-8.86345	7.75791e-19	6.6396e-17
gene-wu:fi09b08	1515.95	-13.7939	3.71026	-3.71778	0.000200978	0.000985338
gene-zgc:171474	6342.44	-13.6416	1.17529	-11.607	3.79674e-31	1.11831e-28
gene-LOC564755	1242.28	-13.5069	1.57688	-8.56561	1.07504e-17	7.9734e-16
gene-qdprb2-4	1009	-13.2068	1.8552	-7.11881	1.0886e-12	3.87591e-11
gene-LOC110437821	983.51	-13.1699	1.56879	-8.39495	4.6609e-17	3.18401e-15
gene-si:dkeyp-98a7.8	863.702	-12.9825	1.56678	-8.28612	1.17007e-16	7.64764e-15
gene-zgc:152652	5338.83	-12.8459	1.02094	-12.5824	2.63894e-36	1.36026e-33
gene-LOC110440097	1744.51	-12.7226	1.78367	-7.13281	9.83429e-13	3.51801e-11
gene-si:ch211-146l10.8	9392.45	-12.6258	0.834832	-15.1237	1.12969e-51	2.84681e-48
gene-LOC100537972	3698.26	-12.5617	1.24371	-10.1002	5.51407e-24	8.01661e-22
gene-qdprb2-6	2008.32	-12.529	3.76162	-3.33074	0.00086616	0.00344158
gene-LOC100332822	1881.53	-12.5005	1.87731	-6.65875	2.76168e-11	7.67585e-10
gene-zp2.6	602.732	-12.4635	1.57217	-7.92757	2.23477e-15	1.23621e-13
gene-si:ch211-125e6.13	2792.44	-12.4573	1.17679	-10.5858	3.46845e-26	6.29315e-24
gene-si:ch211-250e5.16	3252.14	-12.1176	1.07853	-11.2352	2.73752e-29	6.97606e-27
gene-LOC108184065	440.139	-12.01	1.63326	-7.35338	1.9325e-13	7.96894e-12
gene-si:ch211-125e6.12	2011.33	-11.9763	1.19461	-10.0252	1.18118e-23	1.69552e-21
gene-zp2.3	2000.21	-11.9669	1.19772	-9.99145	1.66128e-23	2.34011e-21
gene-LOC100537597	5847.13	-11.9413	0.836731	-14.2714	3.30071e-46	4.99067e-43
gene-zgc:171750	9507.67	-11.9027	0.810712	-14.6818	8.43714e-49	1.73959e-45
gene-si:dkeyp-98a7.4	393.314	-11.8476	1.75978	-6.73243	1.66856e-11	4.81462e-10
gene-si:dkeyp-20e4.8-2	945.37	-11.8244	1.40428	-8.42024	3.75719e-17	2.62194e-15
gene-si:ch211-12h2.6-2	2324.72	-11.7752	1.09782	-10.726	7.68914e-27	1.54327e-24
gene-LOC795984-3	373.908	-11.7747	1.5858	-7.42511	1.12683e-13	4.87719e-12
gene-si:ch73-160p18.3	5114.45	-11.7474	0.839142	-13.9993	1.57503e-44	1.78608e-41
gene-LOC110438210	360.019	-11.72	1.70863	-6.85928	6.92089e-12	2.15612e-10
gene-zgc:175136	3935.79	-11.7158	0.871761	-13.4392	3.56368e-41	3.36768e-38
gene-wu:fi42e03	7641.4	-11.6592	1.10415	-10.5594	4.5945e-26	8.14089e-24
gene-zgc:171977	7820.5	-11.6295	0.995834	-11.6782	1.64792e-31	5.26406e-29
gene-ca15b	2266.62	-11.609	1.02365	-11.3408	8.23698e-30	2.30636e-27
gene-zgc:173837	5064.8	-11.5879	0.878641	-13.1884	1.02293e-39	8.59263e-37
gene-zgc:171818	5046.12	-11.5858	0.873694	-13.2607	3.91147e-40	3.412e-37
gene-LOC100331830	786.638	-11.5599	1.42045	-8.13817	4.01312e-16	2.4533e-14
gene-si:dkey-172k15.19	2717.85	-11.4818	0.931347	-12.3281	6.39064e-35	2.7873e-32
gene-LOC101885477	718.644	-11.4271	1.36788	-8.35383	6.60842e-17	4.46068e-15
gene-si:ch1073-75o15.3	1686.25	-11.4106	1.25577	-9.08657	1.0221e-19	9.61873e-18
gene-LOC100331909-2	1590.07	-11.3313	1.25199	-9.05062	1.42157e-19	1.32136e-17
gene-si:ch211-250e5.16-2	1917.9	-11.3286	1.20392	-9.40974	4.97384e-21	5.64033e-19
gene-si:ch211-127b11.1	270.122	-11.3055	1.64452	-6.87467	6.21326e-12	1.94368e-10
gene-zgc:165539	4729.8	-11.2676	0.773824	-14.5609	4.98135e-48	8.69054e-45
gene-LOC100331909	662.175	-11.2253	1.38691	-8.09372	5.78703e-16	3.45394e-14
gene-zgc:153499	1972.12	-11.2201	1.06666	-10.5188	7.07388e-26	1.23412e-23
gene-si:dkey-90l23.1	5739.21	-11.1783	1.00241	-11.1514	7.05144e-29	1.73833e-26
gene-si:ch211-146l10.7	8797.3	-11.1014	0.878147	-12.6419	1.24072e-36	6.69989e-34
gene-mcm6l	1416.57	-11.0494	1.06266	-10.3978	2.53594e-25	4.16776e-23
gene-si:ch211-263m18.4	6571.32	-11.0226	0.856074	-12.8757	6.16506e-38	4.11246e-35
gene-LOC100301575	529.638	-10.9908	1.46411	-7.50682	6.05799e-14	2.74791e-12
gene-retsatl	9459.85	-10.9719	0.866015	-12.6695	8.73096e-37	4.82971e-34
gene-si:ch1073-75o15.4	900.235	-10.9558	1.23835	-8.8471	8.98251e-19	7.57336e-17
gene-zgc:175135	2042.32	-10.9289	3.07392	-3.55538	0.000377437	0.00168642
gene-LOC100535847-2	199.434	-10.8679	1.60377	-6.77647	1.23144e-11	3.65086e-10
gene-wu:fi09b08-2	3801.28	-10.7854	0.91495	-11.7879	4.50551e-32	1.50272e-29
gene-si:dkeyp-98a7.7	1068.23	-10.7512	1.25599	-8.55993	1.12931e-17	8.34293e-16
gene-si:ch211-154a22.8-3	756.221	-10.6941	1.19211	-8.97076	2.94486e-19	2.6399e-17
gene-si:dkey-240e12.6	3679.21	-10.6518	0.84686	-12.5779	2.79188e-36	1.40711e-33
gene-si:dkey-241l7.6	5482.13	-10.6273	0.854753	-12.4332	1.72678e-35	7.6791e-33
gene-LOC100536860	6976.1	-10.6167	0.807223	-13.1521	1.65487e-39	1.34044e-36
gene-zgc:173556	9906.12	-10.4623	0.839167	-12.4675	1.1225e-35	5.1922e-33
gene-si:ch211-14a17.7	5024.84	-10.4585	0.803212	-13.0209	9.31117e-39	6.81217e-36
gene-si:dkey-216e24.3	1201.33	-10.4444	1.13575	-9.19608	3.71237e-20	3.7091e-18
gene-LOC108179180	147.074	-10.4286	1.62204	-6.42932	1.28173e-10	3.14948e-09
gene-ppfibp1a-2	136.494	-10.3207	1.65946	-6.21933	4.99287e-10	1.10692e-08
gene-LOC100332229	6708.38	-10.2507	0.729757	-14.0467	8.06926e-45	1.01673e-41
gene-LOC110439932	598.754	-10.2325	1.18152	-8.66044	4.69936e-18	3.62522e-16
gene-LOC100535847	128.305	-10.2314	1.71519	-5.96516	2.44389e-09	4.66169e-08
gene-zp2.5	3752.03	-10.2286	0.787942	-12.9814	1.55954e-38	1.07183e-35
gene-zgc:171776	3820.97	-10.1713	0.901916	-11.2775	1.69518e-29	4.47053e-27
gene-si:ch211-250e5.3	1867.33	-10.1443	0.883302	-11.4845	1.5776e-30	4.47248e-28
gene-zp2.2	6647.01	-10.1411	0.662007	-15.3187	5.73959e-53	1.62717e-49
gene-zp3a.1	9067.28	-10.1224	0.606065	-16.7019	1.27063e-62	1.4409e-58
gene-si:zfos-1505d6.3	694.212	-10.0821	1.28915	-7.82067	5.2542e-15	2.80389e-13
gene-si:dkey-229d11.5	8540.97	-10.0798	0.643295	-15.6691	2.4612e-55	9.30332e-52
gene-si:dkey-152b24.6	2643.64	-10.0423	0.797666	-12.5896	2.40791e-36	1.27003e-33
gene-LOC100332822-2	4381.86	-10.0343	0.853177	-11.7611	6.19265e-32	2.00642e-29
gene-LOC100536038	1906.21	-10	0.840087	-11.9036	1.13388e-32	4.01817e-30
gene-zp3.2	8003.45	-9.96232	0.91797	-10.8526	1.93933e-27	4.09787e-25
gene-LOC101883897	417.129	-9.90596	1.55282	-6.37935	1.77846e-10	4.21479e-09
gene-zgc:171445	7703.7	-9.90292	0.586555	-16.8832	5.98161e-64	1.35663e-59
gene-gtf3ab	782.276	-9.86619	3.04783	-3.23712	0.00120742	0.0045557
gene-LOC100148225	6702.37	-9.83972	0.788613	-12.4772	9.9366e-36	4.69504e-33
gene-cldnd	6691.64	-9.81199	0.755279	-12.9912	1.37213e-38	9.72495e-36
gene-zgc:171779	9475.33	-9.80743	0.81553	-12.0258	2.59935e-33	9.99207e-31
gene-zp3a.2	6728.33	-9.79415	0.683936	-14.3203	1.63492e-46	2.64857e-43
gene-zgc:136254	2941.43	-9.78894	0.715996	-13.6718	1.49688e-42	1.61663e-39
gene-ncapg	272.314	-9.78782	1.70857	-5.72866	1.01225e-08	1.66723e-07
gene-si:ch1073-263o8.2	8715.7	-9.66786	0.598124	-16.1636	9.10472e-59	5.16237e-55
gene-si:ch211-214b16.2	85.9658	-9.65391	1.66766	-5.7889	7.08507e-09	1.21367e-07
gene-h1m	9288.82	-9.65255	1.11585	-8.65039	5.13242e-18	3.9193e-16
gene-si:dkeyp-46h3.8	1317.5	-9.62056	0.914867	-10.5158	7.30526e-26	1.26476e-23
gene-si:ch73-14h10.2-4	220.725	-9.58547	1.49685	-6.40377	1.51587e-10	3.65355e-09
gene-zp2.1	950.571	-9.54679	0.891842	-10.7046	9.68808e-27	1.91066e-24
gene-zgc:111868	9374.81	-9.50681	0.728516	-13.0495	6.39291e-39	4.83304e-36
gene-kpna7	6381.17	-9.47021	0.835482	-11.335	8.80028e-30	2.43403e-27
gene-zgc:113424	1204.71	-9.45331	0.856718	-11.0343	2.60976e-28	6.16556e-26
gene-si:dkey-192l18.10	73.6195	-9.43017	1.68089	-5.61022	2.02075e-08	3.08002e-07
gene-LOC108184066	68.7512	-9.33151	1.69109	-5.51803	3.42813e-08	4.90845e-07
gene-espl1-3	167.882	-9.3309	1.43075	-6.52167	6.95293e-11	1.80055e-09
gene-si:dkey-241l7.5	5343	-9.28143	0.794877	-11.6766	1.67968e-31	5.291e-29
gene-si:dkey-241l7.2	3598.1	-9.23012	1.01508	-9.09302	9.63245e-20	9.14075e-18
gene-zglp1	1397.7	-9.22225	0.753991	-12.2312	2.11663e-34	9.05756e-32
gene-si:ch211-12h2.6	567.464	-9.21644	0.971956	-9.48236	2.48592e-21	2.87656e-19
gene-zgc:171446	5147.29	-9.18217	0.858727	-10.6928	1.10028e-26	2.15123e-24
gene-si:dkey-179j5.5-3	61.2768	-9.16514	1.77097	-5.17522	2.27647e-07	2.5854e-06
gene-zgc:162969	2009.52	-9.16142	0.734914	-12.466	1.14467e-35	5.1922e-33
gene-LOC103909927	1656.49	-9.15507	0.874218	-10.4723	1.15805e-25	1.97478e-23
gene-zp3	9438.18	-9.1514	0.837455	-10.9276	8.50345e-28	1.90949e-25
gene-zgc:171734	280.701	-9.12509	1.2117	-7.53084	5.04157e-14	2.30066e-12
gene-spns1	59.4901	-9.12246	2.31557	-3.93962	8.16093e-05	0.000449903
gene-birc5b	357.743	-9.09464	1.16702	-7.79305	6.54087e-15	3.41813e-13
gene-kcnc2	139.583	-9.06406	1.42334	-6.36818	1.9129e-10	4.50982e-09
gene-crp2	4632.36	-9.04649	0.64236	-14.0832	4.81649e-45	6.82737e-42
gene-LOC110438624	53.5704	-8.97161	1.73254	-5.1783	2.23914e-07	2.54942e-06
gene-abhd15a	53.478	-8.96931	2.12321	-4.22442	2.3956e-05	0.000155501
gene-stab2-2	50.6039	-8.88895	1.9044	-4.66758	3.04775e-06	2.56677e-05
gene-si:dkey-46g23.2	3447.5	-8.80227	0.821769	-10.7114	9.00191e-27	1.79091e-24
gene-LOC110440102	1778.96	-8.6919	0.681129	-12.761	2.70667e-37	1.61546e-34
gene-gbgt1l4	549.84	-8.63711	1.23592	-6.98842	2.77997e-12	9.32688e-11
gene-cmss1-2	42.2206	-8.62801	1.77127	-4.87109	1.10983e-06	1.05939e-05
gene-si:dkey-112g5.16-2	41.9867	-8.61976	1.80247	-4.78219	1.73393e-06	1.56551e-05
gene-LOC108179134	561.992	-8.57639	0.976087	-8.78651	1.54282e-18	1.25416e-16
gene-zgc:171670	4437.96	-8.55287	1.12121	-7.62824	2.37987e-14	1.14597e-12
gene-tmprss4b	323.984	-8.54083	1.02505	-8.33208	7.94325e-17	5.32997e-15
gene-qdprb2-5	408.402	-8.53177	1.8614	-4.58352	4.57205e-06	3.6667e-05
gene-zgc:195245	1478.64	-8.49735	0.664049	-12.7963	1.72025e-37	1.08376e-34
gene-si:dkeyp-46h3.2	3957.92	-8.49406	1.03668	-8.19353	2.53676e-16	1.59576e-14
gene-nkain4	37.8299	-8.46962	1.7956	-4.71688	2.39494e-06	2.07794e-05
gene-cldng	4903.09	-8.4335	0.54033	-15.6081	6.41583e-55	2.07873e-51
gene-ppp1r8b-2	35.4009	-8.37341	1.99609	-4.19491	2.72976e-05	0.000174791
gene-cth1	1340.43	-8.32512	0.809617	-10.2828	8.42573e-25	1.29119e-22
gene-si:ch73-90k17.1	3516.97	-8.32329	0.633609	-13.1363	2.03908e-39	1.5947e-36
gene-si:ch211-145c1.1	1254.58	-8.1925	0.671225	-12.2053	2.91273e-34	1.22335e-31
gene-zar1	3831.68	-8.16849	0.551494	-14.8116	1.23355e-49	2.79769e-46
gene-si:ch211-241j12.4	259.753	-8.08388	0.996218	-8.11457	4.87506e-16	2.95632e-14
gene-LOC110438972	28.7929	-8.07539	2.54811	-3.16917	0.00152877	0.00557796
gene-si:dkeyp-50f7.2	9851.87	-8.05418	0.575133	-14.004	1.47292e-44	1.75821e-41
gene-chia.4	2664.91	-7.98015	0.735312	-10.8527	1.93529e-27	4.09787e-25
gene-si:ch73-132k15.2	1655.43	-7.97209	1.18493	-6.7279	1.72126e-11	4.96039e-10
gene-zgc:171426	3870.8	-7.93739	0.755685	-10.5036	8.31704e-26	1.42902e-23
gene-sgf29	60.0995	-7.86963	2.16029	-3.64285	0.000269637	0.00126901
gene-isg20	141.61	-7.8609	1.54882	-5.07543	3.8663e-07	4.14599e-06
gene-zgc:56231	4583.5	-7.85693	0.652558	-12.0402	2.18426e-33	8.54119e-31
gene-LOC110439410	24.2816	-7.82983	1.9239	-4.06976	4.70611e-05	0.000280368
gene-lcorl-3	57.9167	-7.81476	2.10229	-3.71725	0.000201401	0.000986987
gene-LOC565175	97.4632	-7.7947	1.49563	-5.21165	1.87171e-07	2.17471e-06
gene-si:dkey-43p13.5	354.224	-7.67763	0.987436	-7.77532	7.52561e-15	3.89412e-13
gene-LOC100535162	1181.2	-7.67715	0.743288	-10.3286	5.23006e-25	8.23734e-23
gene-si:dkey-207j16.5	21.7037	-7.66743	2.20857	-3.47167	0.000517227	0.00220959
gene-LOC100535338	90.338	-7.65866	1.35476	-5.65313	1.57548e-08	2.47062e-07
gene-si:dkey-208k4.2	1114	-7.65629	0.656549	-11.6614	2.00694e-31	6.23527e-29
gene-LOC110438347	640.378	-7.58349	0.713522	-10.6283	2.20185e-26	4.06e-24
gene-tmprss4b-2	325.782	-7.50016	0.833566	-8.99767	2.30551e-19	2.09156e-17
gene-ddx31	137.113	-7.49163	1.70634	-4.39046	1.13114e-05	8.06988e-05
gene-tuba4l	9581.83	-7.44263	0.509087	-14.6196	2.10747e-48	3.98312e-45
gene-si:dkey-88l16.5	371.043	-7.43591	0.77895	-9.54607	1.34716e-21	1.60808e-19
gene-LOC101884743	18.2966	-7.42148	2.0368	-3.6437	0.000268744	0.00126612
gene-buc2l	2329.86	-7.40993	0.545096	-13.5938	4.35799e-42	4.49269e-39
gene-elovl7b	1153.4	-7.40722	0.612818	-12.0871	1.23498e-33	4.91392e-31
gene-foxh1	372.353	-7.40477	0.800461	-9.25064	2.23162e-20	2.3432e-18
gene-mettl14-2	43.4882	-7.38517	1.60462	-4.60246	4.17538e-06	3.38326e-05
gene-gbgt1l1	193.322	-7.36072	0.951897	-7.73269	1.05301e-14	5.30717e-13
gene-cx44.2	306.004	-7.33603	0.872462	-8.40842	4.15564e-17	2.86474e-15
gene-zgc:165518	3930.1	-7.31492	0.608972	-12.0119	3.07611e-33	1.16277e-30
gene-ltk	16.6232	-7.28312	2.0779	-3.50505	0.000456527	0.00199154
gene-otx1b	886.429	-7.27012	0.683405	-10.6381	1.98179e-26	3.68418e-24
gene-pabpc1l	761.153	-7.22694	0.642198	-11.2535	2.22698e-29	5.78847e-27
gene-epas1b-3	44.8725	-7.2092	1.63083	-4.42057	9.84409e-06	7.15819e-05
gene-LOC108181630	15.6584	-7.19671	2.12372	-3.38873	0.000702162	0.00286989
gene-pfdn5-3	15.5477	-7.18669	2.10551	-3.41327	0.000641877	0.00265426
gene-zgc:110788	283.911	-7.16947	0.951711	-7.53324	4.94983e-14	2.26335e-12
gene-prokr1b	15.3325	-7.16661	2.11186	-3.39351	0.000690026	0.00282691
gene-phex	2619.24	-7.1597	0.793947	-9.01785	1.9182e-19	1.75422e-17
gene-hs3st3b1a	15.111	-7.14607	2.1673	-3.29722	0.000976484	0.00381642
gene-si:dkey-37o8.1	1128.79	-7.12831	0.898574	-7.93292	2.1406e-15	1.18701e-13
gene-trim35-29	832.388	-7.11859	0.674882	-10.5479	5.19431e-26	9.13233e-24
gene-birc5b-2	239.401	-7.11733	1.2909	-5.51346	3.51842e-08	5.03139e-07
gene-cx44.2-2	14.8138	-7.11673	2.14778	-3.31353	0.000921256	0.00362871
gene-dnajc6	13.8016	-7.01455	2.19561	-3.19481	0.00139924	0.00517023
gene-LOC100334800	379.138	-7.00888	0.779601	-8.99035	2.46454e-19	2.22692e-17
gene-si:ch73-78o10.1	171.887	-6.97581	1.16158	-6.00547	1.90783e-09	3.72372e-08
gene-cyp2x7-2	159.28	-6.96985	1.39713	-4.9887	6.07869e-07	6.22976e-06
gene-si:ch73-303b9.1	1681.18	-6.94825	0.637607	-10.8974	1.18622e-27	2.612e-25
gene-kcns3b	149.449	-6.9265	1.07258	-6.45778	1.06252e-10	2.64232e-09
gene-wu:fi34b01	895.764	-6.92421	0.624641	-11.0851	1.48188e-28	3.57543e-26
gene-si:ch211-198m1.1	143.038	-6.92327	0.975236	-7.09907	1.25602e-12	4.42064e-11
gene-vamp8-2	31.3847	-6.92187	1.85265	-3.7362	0.000186825	0.000924544
gene-pitpnc1	12.8778	-6.91482	2.2069	-3.13327	0.0017287	0.00619383
gene-etv5b-2	284.083	-6.86901	1.02659	-6.69111	2.21487e-11	6.2635e-10
gene-slc9a2	51.9769	-6.86543	1.39572	-4.91893	8.70201e-07	8.56976e-06
gene-gtf3ab-2	2466.74	-6.84061	0.605039	-11.3061	1.22452e-29	3.26731e-27
gene-si:ch211-223m11.2	912.264	-6.83488	0.664231	-10.2899	7.82449e-25	1.21547e-22
gene-si:ch211-14a17.7-2	409.995	-6.81603	1.16513	-5.85003	4.91499e-09	8.76352e-08
gene-lmo7b	131.827	-6.80467	0.973981	-6.98645	2.8192e-12	9.44454e-11
gene-zgc:153049	28.5003	-6.77522	1.66725	-4.06371	4.82995e-05	0.000286538
gene-twsg1b-2	70.6203	-6.77025	1.2478	-5.42575	5.77118e-08	7.62792e-07
gene-slbp2	2713.96	-6.76964	0.555322	-12.1905	3.49416e-34	1.41513e-31
gene-aifm1	174.918	-6.76088	0.987093	-6.84929	7.42187e-12	2.29956e-10
gene-mbd1b	105.85	-6.74983	1.38932	-4.85838	1.1835e-06	1.12402e-05
gene-buc	5985.74	-6.73158	0.498454	-13.5049	1.46303e-41	1.44268e-38
gene-gla-2	46.6724	-6.71795	1.44423	-4.65158	3.29406e-06	2.73961e-05
gene-zp3b	9496.8	-6.71224	0.630908	-10.639	1.962e-26	3.67754e-24
gene-si:dkey-167i21.2	1930.87	-6.67075	0.546876	-12.1979	3.1893e-34	1.31515e-31
gene-LOC100329495	102.466	-6.64226	1.17226	-5.66622	1.45985e-08	2.30727e-07
gene-LOC100332626	173.616	-6.6264	0.971802	-6.81867	9.18892e-12	2.78616e-10
gene-lrrc3b	25.6658	-6.62435	1.68539	-3.93044	8.47898e-05	0.000465062
gene-zgc:194551	33.985	-6.58794	2.10507	-3.12956	0.00175069	0.00626173
gene-st8sia2	42.2659	-6.577	1.4612	-4.50109	6.76048e-06	5.14868e-05
gene-espn	24.7139	-6.57106	1.75208	-3.75044	0.000176527	0.000880502
gene-zgc:162592	335.917	-6.56924	0.713994	-9.20069	3.5565e-20	3.56909e-18
gene-caprin2	2706.36	-6.56912	0.649239	-10.1182	4.58859e-24	6.75775e-22
gene-s100a1	1074.94	-6.54982	0.582067	-11.2527	2.24597e-29	5.78847e-27
gene-vtg1	655.49	-6.52232	1.70622	-3.82266	0.000132018	0.000685321
gene-dapk2b	109.414	-6.51334	1.18772	-5.48388	4.16094e-08	5.82531e-07
gene-LOC101884695	87.3368	-6.49107	1.10948	-5.85054	4.89973e-09	8.74319e-08
gene-plxna3	23.401	-6.49063	1.70616	-3.80423	0.000142248	0.000730732
gene-si:dkey-88l16.3	3610.43	-6.48082	0.829961	-7.80859	5.78295e-15	3.05017e-13
gene-ush1gb	28.7205	-6.47568	1.80075	-3.5961	0.00032302	0.00147853
gene-LOC556707	70.4717	-6.4696	1.56643	-4.13017	3.62499e-05	0.000223745
gene-tph1a	92.2773	-6.46822	1.10905	-5.83221	5.46989e-09	9.64674e-08
gene-si:ch211-157j23.2	294.158	-6.45777	0.73991	-8.72778	2.59725e-18	2.07414e-16
gene-zp3c	3428.45	-6.4514	0.507356	-12.7157	4.83535e-37	2.74164e-34
gene-si:ch211-286b5.4	860.741	-6.43745	0.703159	-9.15504	5.43363e-20	5.33483e-18
gene-tecrl2b	65.447	-6.42329	1.27697	-5.0301	4.90219e-07	5.13304e-06
gene-mtus1a-2	183.028	-6.39482	1.19436	-5.3542	8.59355e-08	1.0852e-06
gene-hsd3b2	306.836	-6.3494	1.1782	-5.38907	7.08242e-08	9.18932e-07
gene-si:ch211-11i22.4	976.491	-6.34482	0.581569	-10.9098	1.03457e-27	2.3004e-25
gene-LOC103911953	20.9873	-6.3338	1.73753	-3.64529	0.000267094	0.00126018
gene-LOC100004180	78.2449	-6.33275	1.08542	-5.83436	5.39972e-09	9.53783e-08
gene-bmp15	807.846	-6.31411	0.582709	-10.8358	2.32954e-27	4.84715e-25
gene-si:ch211-132b12.8	3280.98	-6.31359	0.528237	-11.9522	6.32383e-33	2.3133e-30
gene-zgc:100911	169.781	-6.31298	0.87014	-7.25513	4.0127e-13	1.54251e-11
gene-donson	95.1896	-6.27606	1.0884	-5.76631	8.10252e-09	1.36022e-07
gene-st3gal8	959.436	-6.25982	0.58086	-10.7768	4.43013e-27	8.97102e-25
gene-heatr5a	48.4898	-6.24552	1.3242	-4.71644	2.40012e-06	2.08067e-05
gene-opn7d	163.094	-6.24161	0.906155	-6.88802	5.65758e-12	1.77967e-10
gene-zbtb42	24.6275	-6.23742	1.82515	-3.41747	0.000632052	0.00261778
gene-si:ch211-207i20.2-2	69.5209	-6.22758	1.24248	-5.01224	5.38007e-07	5.59468e-06
gene-acp5a	19.4089	-6.22077	1.7608	-3.53293	0.000410984	0.00181557
gene-prickle1a	87.2623	-6.20339	1.01928	-6.08603	1.15744e-09	2.35222e-08
gene-slc16a3	438.198	-6.19949	1.11046	-5.58282	2.36645e-08	3.54732e-07
gene-pi15a	23.1628	-6.15215	1.81439	-3.39076	0.00069698	0.0028518
gene-crygmxl1	18.2196	-6.13109	1.85023	-3.31369	0.000920723	0.00362724
gene-si:ch211-103b1.2	2004.43	-6.12843	0.547362	-11.1963	4.25156e-29	1.05962e-26
gene-si:ch211-157j23.3	80.6231	-6.0878	1.07322	-5.67246	1.40763e-08	2.23251e-07
gene-lrrtm4	17.6089	-6.08106	1.80834	-3.36278	0.000771617	0.00311337
gene-hapln4	184.677	-6.0759	1.11146	-5.46658	4.58814e-08	6.31426e-07
gene-si:ch211-14a17.6	92.6386	-6.05539	0.985491	-6.14455	8.01913e-10	1.69658e-08
gene-LOC100334275	350.039	-6.04448	0.672983	-8.98162	2.66818e-19	2.40136e-17
gene-LOC101885715	168.001	-6.03523	0.862955	-6.99368	2.67775e-12	9.04104e-11
gene-lmo7b-2	41.3537	-6.0316	1.39051	-4.33768	1.43993e-05	9.95052e-05
gene-si:dkey-68o6.5-2	398.625	-6.0246	0.938723	-6.41787	1.38194e-10	3.36713e-09
gene-LOC101886161	242.895	-6.01038	0.748701	-8.02774	9.92886e-16	5.77402e-14
gene-scn1a	78.2089	-5.99904	1.11522	-5.37924	7.47992e-08	9.6389e-07
gene-LOC564674	423.197	-5.99765	0.715791	-8.37905	5.33558e-17	3.61227e-15
gene-usp5	108.1	-5.99289	1.73822	-3.44772	0.000565337	0.0023828
gene-LOC108181540	125.291	-5.99012	0.936434	-6.39674	1.5873e-10	3.81432e-09
gene-zgc:110348	16.5239	-5.98842	1.81771	-3.29448	0.00098603	0.00384643
gene-lrrc3	16.3311	-5.97296	1.88918	-3.16166	0.00156871	0.00570349
gene-si:ch211-241j12.3	1527.56	-5.95693	0.541147	-11.008	3.49828e-28	8.17949e-26
gene-LOC565175-2	105.172	-5.94822	1.20398	-4.94045	7.79421e-07	7.75659e-06
gene-cracr2ab	16.0462	-5.94621	1.82869	-3.25161	0.00114751	0.00436965
gene-zgc:171699	55.3117	-5.94079	1.9783	-3.00298	0.00267348	0.00889984
gene-LOC100536170	20.3506	-5.93787	1.86445	-3.18479	0.0014486	0.00533001
gene-nags-2	15.5938	-5.90806	1.92857	-3.06343	0.00218812	0.00755696
gene-htr5aa	25.978	-5.88969	1.58493	-3.71606	0.000202356	0.000990168
gene-pou5f3	319.882	-5.88313	0.694946	-8.46559	2.54859e-17	1.80632e-15
gene-esamb	15.2808	-5.8754	1.84716	-3.18078	0.00146881	0.00539825
gene-si:ch211-39i2.2	566.326	-5.87297	0.651588	-9.01331	1.99922e-19	1.82098e-17
gene-syne2a	81.4213	-5.86407	1.11801	-5.24508	1.56216e-07	1.85594e-06
gene-st3gal2	57.1177	-5.86137	1.21846	-4.81049	1.50559e-06	1.3847e-05
gene-bco2a	102.261	-5.85885	1.13142	-5.1783	2.23917e-07	2.54942e-06
gene-LOC110439861	69.4181	-5.83454	1.14326	-5.10342	3.33573e-07	3.61982e-06
gene-LOC100331268	35.3717	-5.80599	1.39905	-4.14994	3.32556e-05	0.000207594
gene-b4galnt2.2-2	92.3021	-5.79165	1.2282	-4.71557	2.41036e-06	2.08812e-05
gene-si:ch211-14a17.6-2	557.656	-5.78836	0.689958	-8.38944	4.88483e-17	3.32697e-15
gene-zgc:112146	246.655	-5.77412	1.09942	-5.25198	1.50469e-07	1.79141e-06
gene-zp3d.1	1074.69	-5.76714	0.65414	-8.81637	1.18231e-18	9.78641e-17
gene-LOC100537342	23.8521	-5.76502	1.58309	-3.64164	0.000270909	0.00127394
gene-heatr1	44.756	-5.75119	1.28172	-4.48708	7.22046e-06	5.44415e-05
gene-dhx33	23.4061	-5.73882	1.59115	-3.60672	0.00031009	0.0014277
gene-ctss2.1	3743.34	-5.73317	0.592381	-9.67818	3.73302e-22	4.67762e-20
gene-prkar1b-2	22.4067	-5.69237	1.70549	-3.33768	0.000844806	0.00337149
gene-si:dkey-1h24.2-2	13.2563	-5.6699	1.9118	-2.96574	0.00301951	0.00986317
gene-LOC566119	203.338	-5.66805	0.880415	-6.43793	1.21111e-10	2.99215e-09
gene-st6gal2a	279.954	-5.61833	0.677305	-8.29512	1.08474e-16	7.15169e-15
gene-LOC559843	1196.63	-5.61623	0.769103	-7.30231	2.82866e-13	1.12947e-11
gene-ddx19	2294.35	-5.592	0.601107	-9.30283	1.36758e-20	1.49119e-18
gene-LOC100332428-2	80.8276	-5.58356	1.76307	-3.16696	0.00154044	0.00561691
gene-trim2b	20.9514	-5.58258	1.62729	-3.43059	0.000602268	0.00251231
gene-rdh10b	3602.62	-5.57578	0.615742	-9.05538	1.36094e-19	1.27021e-17
gene-ftr86	764.766	-5.55529	0.558439	-9.94789	2.57596e-23	3.56237e-21
gene-scarb1	4040.91	-5.54413	0.529669	-10.4672	1.22244e-25	2.06902e-23
gene-rab15	245.372	-5.5439	0.718487	-7.71607	1.19973e-14	5.99338e-13
gene-LOC110437953	29.2191	-5.54144	1.45558	-3.80703	0.000140643	0.000723799
gene-spsb4a	20.3377	-5.54067	1.63756	-3.38349	0.000715697	0.00291943
gene-lsm14b	2515.78	-5.52363	0.544565	-10.1432	3.55262e-24	5.26623e-22
gene-zgc:77112	1515.6	-5.52341	0.644067	-8.57583	9.83736e-18	7.33919e-16
gene-trpc7b	45.9667	-5.51438	1.30717	-4.21855	2.45876e-05	0.000159191
gene-pik3r3b-4	288.046	-5.50365	0.820749	-6.70565	2.00513e-11	5.70594e-10
gene-bmb	2109.33	-5.49497	0.60168	-9.13271	6.68071e-20	6.44895e-18
gene-zgc:194551-2	180.477	-5.49408	1.10022	-4.9936	5.92627e-07	6.09007e-06
gene-irf1a	77.781	-5.48744	1.1461	-4.78794	1.68499e-06	1.52886e-05
gene-acap3b	429.905	-5.48503	0.734021	-7.47257	7.86435e-14	3.47011e-12
gene-tmem55ba-2	19.452	-5.47967	1.66652	-3.28808	0.00100872	0.00392213
gene-kdf1a	114.459	-5.46595	0.862763	-6.3354	2.36725e-10	5.49533e-09
gene-rlf-2	26.8875	-5.45471	1.59093	-3.42863	0.000606643	0.00252638
gene-dusp4-2	27.3054	-5.45183	1.49341	-3.6506	0.000261629	0.00123749
gene-pth1a	94.2691	-5.44314	0.991175	-5.4916	3.98304e-08	5.60557e-07
gene-cpeb1b	3122.82	-5.43065	0.523175	-10.3802	3.05213e-25	4.90939e-23
gene-orc1-2	512.039	-5.42799	0.708398	-7.66234	1.82569e-14	8.88554e-13
gene-si:dkey-1d7.3	66.8499	-5.42173	1.1655	-4.65184	3.28991e-06	2.73717e-05
gene-elovl6l	368.795	-5.42128	0.891864	-6.07859	1.21243e-09	2.45956e-08
gene-pdp1	96.7357	-5.41921	1.08657	-4.98744	6.1185e-07	6.2649e-06
gene-zar1l-2	1359.22	-5.39036	0.730666	-7.37732	1.61507e-13	6.77074e-12
gene-f2rl1.1	557.123	-5.3708	0.570025	-9.42204	4.424e-21	5.04202e-19
gene-ttc27-2	195.18	-5.36808	0.72365	-7.41806	1.18846e-13	5.09533e-12
gene-gdf3	2761.72	-5.3414	0.569509	-9.37897	6.66225e-21	7.48019e-19
gene-vrtn	56.6403	-5.33747	1.05611	-5.05388	4.32917e-07	4.58382e-06
gene-pif1	1398.72	-5.30639	0.571103	-9.29147	1.52166e-20	1.63821e-18
gene-si:ch211-214c7.4	1067.02	-5.30525	0.583092	-9.09848	9.16071e-20	8.72962e-18
gene-nanos3	156.384	-5.30095	0.79561	-6.66275	2.68758e-11	7.48824e-10
gene-gpc5c	54.9862	-5.29356	1.05985	-4.99465	5.89418e-07	6.06787e-06
gene-si:ch211-160j14.2	548.655	-5.28263	0.6894	-7.66265	1.82132e-14	8.88335e-13
gene-rasgef1ba	22.2887	-5.27811	1.58822	-3.32329	0.000889619	0.00351876
gene-znf710a	164.254	-5.2656	0.805235	-6.53921	6.18444e-11	1.61593e-09
gene-rab11fip5a	38.83	-5.26152	1.29006	-4.07851	4.53256e-05	0.000271379
gene-dnajc11a-2	53.0171	-5.26122	1.54653	-3.40196	0.000669056	0.00275394
gene-LOC101884616	31.2076	-5.25099	1.38004	-3.80497	0.000141823	0.000729374
gene-si:dkeyp-34c12.1	92.814	-5.24895	1.30262	-4.02954	5.58857e-05	0.000324332
gene-trmt2a	162.998	-5.24507	1.5179	-3.45548	0.000549314	0.00232651
gene-si:ch1073-127d16.1	51.8322	-5.24218	1.24177	-4.22155	2.42632e-05	0.000157225
gene-zgc:77118	1566.34	-5.23037	0.672312	-7.77969	7.27046e-15	3.77332e-13
gene-lrrc4c	37.6501	-5.21936	1.30102	-4.01175	6.02713e-05	0.000346766
gene-unc5a	16.0894	-5.21114	1.73327	-3.00653	0.00264246	0.0088095
gene-cux2a	147.954	-5.20202	0.766363	-6.78794	1.13744e-11	3.39883e-10
gene-si:dkey-16j16.4	335.857	-5.196	0.639126	-8.12985	4.29821e-16	2.61349e-14
gene-LOC101884895	137.93	-5.18613	0.767085	-6.76083	1.37203e-11	3.99969e-10
gene-slc2a15b	413.585	-5.18589	0.636961	-8.14162	3.90009e-16	2.39065e-14
gene-fam65a	38.2006	-5.16975	1.55439	-3.32591	0.000881303	0.00349257
gene-si:rp71-45k5.2	181.654	-5.16442	0.799766	-6.45741	1.06507e-10	2.64576e-09
gene-rrbp1b-2	231.424	-5.15586	0.970998	-5.30986	1.09712e-07	1.35159e-06
gene-zgc:194948	35.6386	-5.13343	1.41243	-3.63445	0.00027857	0.00130537
gene-vsig10	28.6169	-5.13233	1.41248	-3.63355	0.000279544	0.00130885
gene-zgc:136302	293.773	-5.13075	0.627207	-8.18032	2.83092e-16	1.75905e-14
gene-apbb2b	62.4743	-5.11569	1.00686	-5.08085	3.75754e-07	4.03699e-06
gene-siva1	3845.4	-5.09876	0.494601	-10.3088	6.42752e-25	1.00535e-22
gene-vgll3	21.1621	-5.09623	1.56859	-3.24892	0.00115844	0.0044009
gene-sh3gl2a	169.012	-5.09312	0.911459	-5.58788	2.29859e-08	3.46163e-07
gene-lin28a	364.043	-5.08515	0.604893	-8.40669	4.21727e-17	2.89841e-15
gene-xpo4-2	74.4009	-5.0844	0.946831	-5.36991	7.87767e-08	1.0077e-06
gene-LOC103908986	597.841	-5.07193	0.573082	-8.85027	8.73099e-19	7.41644e-17
gene-ptcd2	53.5207	-5.06706	1.05567	-4.79987	1.58771e-06	1.45198e-05
gene-st6galnac1.2	409.09	-5.06553	0.631662	-8.01937	1.06288e-15	6.16526e-14
gene-synj1	45.9452	-5.06265	1.23605	-4.09584	4.20648e-05	0.000254272
gene-mcoln2	401.646	-5.06081	0.746875	-6.77597	1.2357e-11	3.65871e-10
gene-LOC103910017	20.1687	-5.05539	1.69047	-2.99052	0.00278502	0.0092171
gene-gtf2f2b	39.9646	-5.05508	1.16374	-4.34382	1.40026e-05	9.70891e-05
gene-abcd3a	82.5872	-5.04292	1.00243	-5.03071	4.88659e-07	5.11907e-06
gene-si:ch211-215a10.4	400.422	-5.01366	0.597822	-8.38655	5.00605e-17	3.39932e-15
gene-atrn-2	52.7666	-5.00868	1.48162	-3.38055	0.00072342	0.00294669
gene-znf618	120.109	-5.0028	0.868921	-5.75748	8.53774e-09	1.42379e-07
gene-trpc5b	123.389	-5.00209	1.03319	-4.84141	1.28921e-06	1.20974e-05
gene-tmem5	109.232	-5.00097	1.31808	-3.79414	0.000148159	0.000756811
gene-tmem168b-2	61.8241	-4.98387	1.20849	-4.12404	3.72283e-05	0.000228694
gene-snai3	87.2189	-4.96343	0.906201	-5.47718	4.32153e-08	6.02041e-07
gene-tln2a-2	31.096	-4.96075	1.24606	-3.98117	6.85782e-05	0.000386402
gene-zgc:77739	92.8826	-4.9558	0.86082	-5.75707	8.55866e-09	1.42623e-07
gene-slc17a9b	445.34	-4.9471	0.594403	-8.32279	8.59152e-17	5.73105e-15
gene-srgap1b	388.063	-4.94253	0.612576	-8.06844	7.1201e-16	4.19439e-14
gene-rpp25a	30.7479	-4.94246	1.2757	-3.87432	0.000106922	0.000569379
gene-pax1b	89.106	-4.94041	0.982724	-5.02726	4.97528e-07	5.19997e-06
gene-trim35-27	173.273	-4.92824	0.902197	-5.46248	4.69518e-08	6.4226e-07
gene-si:dkey-121a9.3	203.752	-4.91193	0.877229	-5.59937	2.15135e-08	3.25284e-07
gene-larp6	1884.61	-4.90941	0.504293	-9.73523	2.13344e-22	2.7337e-20
gene-tmem144b	912.743	-4.90538	0.533529	-9.19421	3.77777e-20	3.75788e-18
gene-ptk7a	24.2262	-4.90128	1.46723	-3.3405	0.000836276	0.00334157
gene-lipg	1111.17	-4.90104	0.531215	-9.22609	2.80699e-20	2.90696e-18
gene-tmx2b	323.864	-4.89903	0.724319	-6.76364	1.34571e-11	3.93816e-10
gene-svopl-2	173.272	-4.8927	0.692589	-7.06436	1.61354e-12	5.57851e-11
gene-cnpy2	263.171	-4.89209	0.70514	-6.93775	3.98383e-12	1.28525e-10
gene-pold1	410.991	-4.89091	0.864105	-5.66009	1.51297e-08	2.38458e-07
gene-LOC101887092	18.1348	-4.88599	1.64031	-2.9787	0.00289476	0.00952047
gene-zbtb8a	382.081	-4.88538	0.627194	-7.78926	6.74034e-15	3.51428e-13
gene-zgc:66479	840.915	-4.88513	0.651806	-7.49476	6.64213e-14	2.98304e-12
gene-las1l	212.612	-4.87055	0.772854	-6.30203	2.93772e-10	6.7505e-09
gene-cdcp1b	937.251	-4.85566	0.520785	-9.32373	1.12326e-20	1.23667e-18
gene-tmem59l	660.549	-4.84281	0.771965	-6.27336	3.53345e-10	8.03797e-09
gene-pi4kab	141.27	-4.83611	0.944951	-5.11785	3.09042e-07	3.39422e-06
gene-rarab-2	71.7482	-4.82689	1.06162	-4.54673	5.4486e-06	4.25971e-05
gene-fbxl8	81.7043	-4.82418	1.11898	-4.31124	1.62345e-05	0.000110404
gene-snx10a	604.255	-4.82357	0.5504	-8.76374	1.88871e-18	1.51363e-16
gene-zgc:162945-2	868.346	-4.81459	0.580775	-8.28995	1.13298e-16	7.44808e-15
gene-LOC101885894	22.3823	-4.81449	1.40644	-3.42317	0.000618955	0.00257104
gene-LOC101884821	40.1186	-4.80974	1.22947	-3.91205	9.15154e-05	0.000497977
gene-tph1a-2	72.2467	-4.80366	1.35096	-3.55573	0.000376931	0.00168516
gene-olfm2a	50.2833	-4.79278	1.01852	-4.70564	2.53076e-06	2.17745e-05
gene-slc12a9	109.727	-4.7891	0.929807	-5.15064	2.59596e-07	2.91323e-06
gene-zgc:73340	169.275	-4.78873	0.733061	-6.53251	6.46752e-11	1.68602e-09
gene-zgc:152891	387.457	-4.77973	0.834917	-5.7248	1.03554e-08	1.70065e-07
gene-zgc:55621	1568.71	-4.77755	0.567856	-8.41331	3.986e-17	2.75618e-15
gene-kank1b	311.673	-4.77326	0.605628	-7.8815	3.23473e-15	1.75092e-13
gene-LOC101887148	77.0748	-4.75679	1.13388	-4.19513	2.72709e-05	0.000174669
gene-LOC108190994	36.7272	-4.74844	1.29247	-3.67392	0.000238854	0.00114553
gene-jmy	37.8156	-4.74197	1.12453	-4.21684	2.47752e-05	0.000160223
gene-vldlr	2819.97	-4.73726	0.788427	-6.00849	1.87256e-09	3.6675e-08
gene-cntn5	53.2331	-4.73253	1.02007	-4.6394	3.49419e-06	2.8807e-05
gene-si:ch211-157c3.4	183.217	-4.73183	1.25517	-3.76988	0.000163329	0.000822996
gene-alox5b.3	692.898	-4.72977	0.603117	-7.84222	4.4265e-15	2.36776e-13
gene-gmnn	4436.18	-4.72687	0.481038	-9.82639	8.66701e-23	1.14284e-20
gene-tgfbrap1	209.942	-4.72621	1.01171	-4.67152	2.98981e-06	2.52448e-05
gene-hnmt	359.047	-4.72145	0.679529	-6.94811	3.70202e-12	1.20635e-10
gene-ext1b	81.6293	-4.71719	0.954512	-4.94199	7.73307e-07	7.7025e-06
gene-LOC103911715	25.8384	-4.70871	1.4649	-3.21436	0.00130735	0.00486955
gene-trim36	838.379	-4.70073	0.763316	-6.15831	7.35261e-10	1.5717e-08
gene-si:dkey-115f9.3	31.468	-4.6987	1.19833	-3.92106	8.8162e-05	0.000482159
gene-fbxo32	750.976	-4.68088	0.713507	-6.56038	5.36692e-11	1.41867e-09
gene-fjx1	271.009	-4.68024	0.729561	-6.41515	1.40686e-10	3.41258e-09
gene-chtf18-2	418.343	-4.67656	1.41384	-3.3077	0.000940668	0.00368915
gene-cdca9	1250.1	-4.66775	1.12911	-4.13402	3.56471e-05	0.000220594
gene-si:dkey-226l10.6-2	66.2855	-4.66547	1.04942	-4.44578	8.75719e-06	6.46527e-05
gene-syt13	414.092	-4.66476	0.675825	-6.90231	5.1162e-12	1.61609e-10
gene-aff2	35.3797	-4.64831	1.21615	-3.82214	0.000132299	0.000686622
gene-wdr91	142.238	-4.64607	0.724865	-6.40956	1.45937e-10	3.52863e-09
gene-zgc:63694	166.347	-4.64474	0.844037	-5.503	3.73382e-08	5.29268e-07
gene-neurod6a	40.263	-4.64197	1.11818	-4.15137	3.30489e-05	0.000206488
gene-ext1a	203.753	-4.6411	0.688086	-6.74494	1.53091e-11	4.42871e-10
gene-ccna1	4358.55	-4.64073	0.885143	-5.24292	1.58057e-07	1.87192e-06
gene-uchl5-2	70.1428	-4.63974	0.921509	-5.03494	4.78e-07	5.01899e-06
gene-si:ch211-282j22.3	182.185	-4.63921	0.868025	-5.34456	9.0637e-08	1.13634e-06
gene-tmem44	880.612	-4.63853	0.523735	-8.85663	8.24707e-19	7.03171e-17
gene-adgrd1	35.0731	-4.62999	1.13841	-4.06707	4.7608e-05	0.000283101
gene-sycp2l	692.399	-4.6285	0.558681	-8.28468	1.18426e-16	7.71813e-15
gene-cers2a	182.084	-4.62727	0.672707	-6.87858	6.04542e-12	1.8964e-10
gene-spire2	89.9959	-4.62654	1.27164	-3.63825	0.000274498	0.00128895
gene-prickle2a	53.7035	-4.61332	1.01873	-4.52849	5.94057e-06	4.59053e-05
gene-trim35-7	384.709	-4.60807	0.765836	-6.01705	1.77622e-09	3.50302e-08
gene-si:ch211-137a8.2	864.786	-4.597	0.530551	-8.66459	4.53142e-18	3.5076e-16
gene-elovl7a-2	191.488	-4.59114	0.901464	-5.09298	3.52481e-07	3.80679e-06
gene-cited4b-2	692.114	-4.58487	0.739553	-6.19952	5.66363e-10	1.24348e-08
gene-gdf9	256.351	-4.57681	0.855541	-5.34961	8.81441e-08	1.10938e-06
gene-ccser1-2	63.9258	-4.57429	0.995563	-4.59468	4.33418e-06	3.50318e-05
gene-dolk	38.3236	-4.57114	1.1425	-4.00099	6.30775e-05	0.000360443
gene-zgc:163014	117.562	-4.56996	0.815524	-5.6037	2.09819e-08	3.17881e-07
gene-dnaja3a	232.759	-4.56606	0.630953	-7.23677	4.59496e-13	1.74271e-11
gene-rab11fip1a	291.941	-4.56429	0.667049	-6.84252	7.78141e-12	2.39136e-10
gene-fkrp	150.149	-4.56343	1.04114	-4.38312	1.16994e-05	8.31014e-05
gene-nanog	1593.46	-4.56231	0.78528	-5.80979	6.25504e-09	1.08708e-07
gene-ssbp3a	62.9417	-4.5619	0.929497	-4.90792	9.20466e-07	9.01e-06
gene-cdc37l1	217.287	-4.56063	0.914925	-4.9847	6.20574e-07	6.34278e-06
gene-fam89a	334.355	-4.55759	0.647181	-7.04222	1.89194e-12	6.5014e-11
gene-plekhg5b	52.5583	-4.55611	1.01476	-4.48985	7.12748e-06	5.38479e-05
gene-map1lc3c	2206.91	-4.55481	0.488136	-9.33102	1.04859e-20	1.16579e-18
gene-oclnb	282.026	-4.5529	0.927203	-4.91036	9.09101e-07	8.92186e-06
gene-LOC100536112	32.875	-4.55123	1.5081	-3.01785	0.00254574	0.00854838
gene-prkra	371.655	-4.54279	0.616874	-7.36422	1.78189e-13	7.41529e-12
gene-akap1b	1520.2	-4.5315	0.549728	-8.24317	1.6771e-16	1.07752e-14
gene-tia1	157.082	-4.52317	0.795471	-5.68615	1.29933e-08	2.07819e-07
gene-si:dkey-191g9.5	50.5383	-4.52069	1.29678	-3.48608	0.000490156	0.00211024
gene-ggt1a	23.0708	-4.50737	1.33332	-3.38056	0.000723376	0.00294669
gene-LOC110440070	41.856	-4.50152	1.13941	-3.95076	7.79048e-05	0.000432
gene-LOC110437877	54.4188	-4.50091	1.20847	-3.72447	0.000195723	0.000963327
gene-LOC108179755	22.3492	-4.49722	1.48186	-3.03484	0.00240662	0.00816975
gene-rbpms2b	2401.2	-4.49406	0.80717	-5.56768	2.58154e-08	3.83428e-07
gene-siah2l	77.7996	-4.48829	0.957894	-4.68558	2.79168e-06	2.37492e-05
gene-eif4e1c	40.6825	-4.48659	1.08292	-4.14303	3.42751e-05	0.000212952
gene-LOC110439997	41.1761	-4.48511	1.07131	-4.18656	2.83217e-05	0.000180432
gene-gb:bm035769	38.2307	-4.48415	1.3042	-3.43825	0.000585494	0.00245091
gene-zfpm2b	103.551	-4.48235	1.22194	-3.66821	0.000244252	0.00116599
gene-ek1	70.2978	-4.47145	0.978238	-4.57092	4.8559e-06	3.8584e-05
gene-LOC101882529	27.0111	-4.46919	1.25453	-3.56243	0.000367432	0.00164886
gene-ccnb2	4258.76	-4.46108	0.607714	-7.34075	2.12399e-13	8.66404e-12
gene-zgc:55413	917.142	-4.4564	0.590972	-7.5408	4.67088e-14	2.14444e-12
gene-lcmt2-2	112.118	-4.45345	1.2084	-3.68542	0.000228328	0.00110063
gene-zgc:152968	639.692	-4.43103	0.708817	-6.25131	4.07027e-10	9.18545e-09
gene-zgc:112399	60.8426	-4.42824	0.952956	-4.64684	3.37058e-06	2.79607e-05
gene-uchl1	1984.47	-4.42526	0.523983	-8.44544	3.02915e-17	2.12697e-15
gene-trmt6	350.424	-4.42204	0.605197	-7.30677	2.73634e-13	1.09454e-11
gene-rpain	922.257	-4.41613	0.521528	-8.46769	2.50316e-17	1.78528e-15
gene-st3gal1	551.709	-4.41294	0.545314	-8.09248	5.84638e-16	3.48021e-14
gene-si:dkey-253i9.4-2	17.2419	-4.40759	1.48664	-2.9648	0.00302884	0.00988689
gene-si:ch211-217a12.1	88.7893	-4.40691	0.947268	-4.65223	3.28371e-06	2.73301e-05
gene-znf131	60.0425	-4.4052	0.91374	-4.82106	1.42797e-06	1.32189e-05
gene-gapvd1	34.3602	-4.40476	1.12423	-3.91802	8.92781e-05	0.000487206
gene-fam110a	221.323	-4.40136	0.854372	-5.15158	2.58301e-07	2.90301e-06
gene-sepsecs	340.988	-4.38032	0.787035	-5.5656	2.61257e-08	3.86769e-07
gene-hic2	58.6985	-4.37532	0.980095	-4.46418	8.03746e-06	5.98849e-05
gene-amt	66.7024	-4.37029	1.20423	-3.62913	0.000284383	0.00132767
gene-zgc:101583-2	21.1096	-4.36919	1.39341	-3.1356	0.00171502	0.0061526
gene-slc35f2	760.632	-4.36723	1.15556	-3.7793	0.00015727	0.000797424
gene-alg1	1247	-4.36334	0.536263	-8.13656	4.06656e-16	2.47929e-14
gene-si:ch211-189e2.3-2	695.815	-4.35865	0.754904	-5.77378	7.75132e-09	1.31488e-07
gene-wdr7	146.925	-4.35556	0.892198	-4.88183	1.05107e-06	1.01135e-05
gene-micall2a	602.204	-4.34918	0.744922	-5.83844	5.26906e-09	9.32883e-08
gene-cited4b	669.559	-4.34667	0.719715	-6.03944	1.54649e-09	3.0794e-08
gene-slco4a1	49.5519	-4.34142	1.08237	-4.01104	6.04518e-05	0.000347452
gene-ttyh2l	223.791	-4.3296	0.624761	-6.93001	4.20815e-12	1.35185e-10
gene-ryr2b	86.4955	-4.32147	0.86235	-5.01127	5.4072e-07	5.61774e-06
gene-sacm1lb	376	-4.31344	0.766911	-5.62443	1.86125e-08	2.86191e-07
gene-cpt1cb	99.4624	-4.30764	0.872358	-4.93793	7.8956e-07	7.83685e-06
gene-xpo6-2	50.7274	-4.30198	1.03188	-4.16906	3.05854e-05	0.000193278
gene-pfklb	150.139	-4.29989	0.74108	-5.8022	6.54514e-09	1.13143e-07
gene-tmem79a	229.794	-4.29876	0.903438	-4.75822	1.95304e-06	1.74115e-05
gene-fign	54.3389	-4.29856	1.00382	-4.28222	1.85039e-05	0.000123541
gene-LOC797085	827.301	-4.29838	0.619436	-6.93919	3.94357e-12	1.27408e-10
gene-si:ch211-117k10.3	30.0199	-4.29184	1.35924	-3.15753	0.00159113	0.00577206
gene-shmt2	136.17	-4.28793	0.705379	-6.0789	1.21007e-09	2.45698e-08
gene-nasp-2	5431.42	-4.28414	0.595801	-7.19055	6.45292e-13	2.38359e-11
gene-serinc5	346.577	-4.28175	0.58927	-7.26619	3.69777e-13	1.43605e-11
gene-si:ch211-241b2.4	367.194	-4.27984	0.650185	-6.5825	4.62597e-11	1.23723e-09
gene-si:ch211-113a14.27	95.4972	-4.27191	1.34574	-3.1744	0.00150147	0.0054978
gene-aass	28.073	-4.26822	1.23272	-3.46243	0.000535315	0.00227284
gene-setd8b-3	459.535	-4.26351	0.921868	-4.62486	3.74848e-06	3.07026e-05
gene-spire1a	118.93	-4.2597	0.746463	-5.70651	1.15317e-08	1.86547e-07
gene-dnajb12b	45.8115	-4.25537	1.25525	-3.39006	0.000698763	0.00285806
gene-samd10a	29.2163	-4.25437	1.37083	-3.10351	0.00191241	0.00674759
gene-si:dkeyp-121d2.7	174.799	-4.25275	0.681643	-6.23896	4.40477e-10	9.89112e-09
gene-tdp2b	397.182	-4.24682	1.18004	-3.59887	0.000319599	0.00146523
gene-ryr2b-3	77.5617	-4.23682	0.958382	-4.42081	9.83335e-06	7.15726e-05
gene-si:ch211-89o9.4	111.764	-4.23269	0.794227	-5.32932	9.85788e-08	1.22374e-06
gene-asah1a-2	284.247	-4.23261	0.897035	-4.71844	2.37659e-06	2.06438e-05
gene-zgc:112183	19.2621	-4.23145	1.37784	-3.07108	0.00213284	0.00739306
gene-eomesa	366.476	-4.23141	0.68479	-6.17913	6.44547e-10	1.39621e-08
gene-LOC101884989	49.6084	-4.22954	1.08234	-3.90778	9.31467e-05	0.000505641
gene-syngr2b	328.638	-4.22365	0.711641	-5.93508	2.93699e-09	5.49142e-08
gene-npm2b	3034.76	-4.22343	0.515555	-8.19202	2.56885e-16	1.60943e-14
gene-mpp6b	67.2786	-4.22096	0.887037	-4.7585	1.95041e-06	1.7395e-05
gene-dnajc25	22.8672	-4.21745	1.30721	-3.22631	0.00125398	0.00469855
gene-mfsd6l	334.499	-4.213	0.586619	-7.18183	6.87839e-13	2.52022e-11
gene-pdzrn4	40.7833	-4.21164	1.35082	-3.11784	0.00182183	0.0064743
gene-dok6	146.209	-4.19495	0.802117	-5.22985	1.69648e-07	1.99152e-06
gene-cacng5b	25.8803	-4.18389	1.34664	-3.10693	0.00189044	0.00668255
gene-zgc:194209	36.5595	-4.17918	1.09239	-3.82572	0.000130388	0.000678101
gene-tfap2e	109.223	-4.1763	0.751933	-5.55408	2.79074e-08	4.0967e-07
gene-irbp	185.271	-4.17318	1.09505	-3.81097	0.000138424	0.000714162
gene-si:ch73-15b2.5	1463.64	-4.16939	0.523938	-7.95781	1.75117e-15	9.85523e-14
gene-ipmkb	416.822	-4.16924	0.8796	-4.73993	2.13794e-06	1.88305e-05
gene-uck2a	189.999	-4.16811	1.05895	-3.93608	8.28238e-05	0.000455601
gene-prtfdc1	405.118	-4.16614	0.590449	-7.05589	1.71498e-12	5.90225e-11
gene-si:dkey-121h17.7	349.737	-4.16247	0.634464	-6.56061	5.35898e-11	1.41867e-09
gene-abhd17b	144.869	-4.15774	0.686464	-6.05675	1.389e-09	2.78784e-08
gene-zgc:101663	636.123	-4.15372	0.687631	-6.04062	1.53522e-09	3.05964e-08
gene-clcn3-2	48.8774	-4.15093	1.37915	-3.00977	0.00261448	0.00873805
gene-cyp2x7	78.4692	-4.14475	1.37754	-3.00881	0.00262276	0.0087576
gene-ica1	111.137	-4.14454	1.02276	-4.05229	5.0718e-05	0.000298465
gene-rcan1b	39.8328	-4.13373	1.07568	-3.84289	0.000121595	0.000637634
gene-mtdhb	292.464	-4.13159	1.11735	-3.69766	0.000217598	0.00105519
gene-magi3a	294.046	-4.13043	0.66402	-6.22035	4.96048e-10	1.10082e-08
gene-ncbp1	59.9663	-4.12847	0.905667	-4.55848	5.15254e-06	4.06609e-05
gene-si:ch211-167j6.3	944.512	-4.128	0.610042	-6.76674	1.31712e-11	3.86947e-10
gene-zbtb18	79.3867	-4.12712	0.812148	-5.08173	3.74017e-07	4.02023e-06
gene-neurod6b	65.8853	-4.12703	0.96819	-4.26262	2.0204e-05	0.00013375
gene-traf6	110.329	-4.12419	0.918945	-4.48796	7.19073e-06	5.42715e-05
gene-si:ch211-225h24.2	523.765	-4.12375	0.566284	-7.28213	3.28595e-13	1.2916e-11
gene-LOC108181182-2	93.9461	-4.12307	0.880549	-4.68238	2.83561e-06	2.40778e-05
gene-fbxo30a	333.133	-4.1162	0.719249	-5.72291	1.04715e-08	1.71475e-07
gene-LOC103910009	139.923	-4.11619	0.967323	-4.25524	2.08826e-05	0.0001378
gene-cyp11a1	1248.84	-4.1155	0.683047	-6.0252	1.689e-09	3.34262e-08
gene-aqp7	55.5165	-4.11364	1.12147	-3.66808	0.00024438	0.00116622
gene-clcn5b	42.6214	-4.11128	0.99425	-4.13506	3.54867e-05	0.000219828
gene-ccdc106b	106.07	-4.11118	1.01184	-4.06309	4.84282e-05	0.000287151
gene-fam78aa	61.3797	-4.10984	1.11839	-3.67477	0.00023806	0.00114221
gene-ptpn4a	91.459	-4.10826	1.25105	-3.28385	0.001024	0.00397541
gene-alpl	138.599	-4.10764	0.922742	-4.45156	8.52468e-06	6.31004e-05
gene-zgc:66440	42.3025	-4.10144	1.30205	-3.14998	0.00163282	0.00590328
gene-im:7136940	383.203	-4.10036	0.586466	-6.99164	2.71684e-12	9.15572e-11
gene-fech	245.639	-4.09929	0.707343	-5.79533	6.81866e-09	1.17424e-07
gene-galnt13	36.6961	-4.09743	1.12461	-3.64344	0.000269019	0.00126689
gene-ccnjl	499.825	-4.09116	0.540675	-7.56675	3.82678e-14	1.78216e-12
gene-tlcd2	130.296	-4.08066	0.698395	-5.84291	5.12963e-09	9.10328e-08
gene-ccnj	205.408	-4.08063	0.683452	-5.97061	2.36364e-09	4.52383e-08
gene-dia1a	450.247	-4.07223	0.57599	-7.06995	1.54985e-12	5.37472e-11
gene-arhgap4b	48.0568	-4.07041	0.955231	-4.26118	2.03353e-05	0.00013458
gene-sptlc2a	655.965	-4.06762	0.602139	-6.75529	1.42554e-11	4.13973e-10
gene-slc5a6a	121.477	-4.06566	0.794558	-5.11688	3.10624e-07	3.40073e-06
gene-fgd4a	34.8639	-4.06172	1.23848	-3.27961	0.00103949	0.00402646
gene-emilin1b	24.8117	-4.05932	1.30826	-3.10285	0.00191669	0.0067606
gene-homeza	147.918	-4.05799	0.731004	-5.55126	2.83624e-08	4.15614e-07
gene-ugt2a2-2	32.5723	-4.05099	1.20675	-3.35695	0.000788078	0.00317189
gene-slc7a4	163.206	-4.04581	1.00714	-4.01711	5.89154e-05	0.000339827
gene-cnpy4-2	161.311	-4.04479	0.858028	-4.71405	2.42837e-06	2.10131e-05
gene-ntrk3a	26.4422	-4.0261	1.32113	-3.04747	0.00230773	0.00789193
gene-si:dkey-170l10.1	26.5658	-4.0215	1.19583	-3.36292	0.000771218	0.00311232
gene-zgc:162160	73.2752	-4.02138	1.00274	-4.0104	6.06149e-05	0.000348302
gene-gpr161	197.797	-4.01901	0.680846	-5.90296	3.5703e-09	6.5726e-08
gene-sybu	1593.98	-4.01842	0.587144	-6.84402	7.70028e-12	2.36964e-10
gene-sh3bp5b	537.446	-4.01658	0.582329	-6.89744	5.29474e-12	1.67016e-10
gene-sox11b	905.998	-4.0128	0.568495	-7.05864	1.68143e-12	5.79556e-11
gene-btg2	2005.67	-4.01168	0.521795	-7.68824	1.49171e-14	7.35478e-13
gene-znrf3	222.811	-4.01077	0.872325	-4.5978	4.2698e-06	3.45484e-05
gene-rrbp1b	1855.7	-4.01072	0.620976	-6.45873	1.05583e-10	2.62856e-09
gene-fam107b	43.3016	-4.00897	1.30955	-3.06133	0.00220352	0.00760437
gene-bach2a	19.8873	-4.00473	1.33375	-3.00261	0.00267679	0.00890505
gene-fam65c	1822.53	-4.0045	0.579653	-6.90845	4.89965e-12	1.56073e-10
gene-si:ch73-350k19.1	37.6343	-3.99958	1.08952	-3.67096	0.000241642	0.00115597
gene-plxna1b	255.047	-3.99604	0.676692	-5.90526	3.52094e-09	6.487e-08
gene-zgc:165508	43.3688	-3.98821	1.16669	-3.41841	0.000629882	0.00260974
gene-zgc:163040	25.832	-3.98067	1.21912	-3.26521	0.00109384	0.00420337
gene-zgc:113054	792.83	-3.97937	0.543911	-7.31622	2.55049e-13	1.02562e-11
gene-tcf19l	225.62	-3.96405	0.679881	-5.83051	5.52587e-09	9.72279e-08
gene-zgc:163030	618.015	-3.96323	0.659776	-6.00693	1.89064e-09	3.69335e-08
gene-trrap	146.496	-3.95695	0.704302	-5.61826	1.92895e-08	2.95799e-07
gene-wasla-3	80.329	-3.95354	0.920232	-4.29624	1.73718e-05	0.000117085
gene-gnb1l	65.0852	-3.95202	1.26508	-3.12393	0.0017845	0.00635859
gene-slc2a3b	75.5996	-3.95113	0.906594	-4.35821	1.31128e-05	9.17613e-05
gene-pcxa	480.445	-3.951	0.540274	-7.31296	2.61321e-13	1.04898e-11
gene-akip1-3	210.62	-3.95083	0.672815	-5.87209	4.30336e-09	7.77072e-08
gene-LOC797855	409.914	-3.94971	0.704225	-5.60859	2.03978e-08	3.10276e-07
gene-zgc:66449	381.175	-3.94094	0.593515	-6.64	3.13673e-11	8.58155e-10
gene-LOC101884037	158.619	-3.93741	0.90175	-4.36641	1.26308e-05	8.88269e-05
gene-fscn2a	27.8012	-3.93632	1.30286	-3.02128	0.00251708	0.00847371
gene-bora	82.1007	-3.93318	0.894423	-4.39745	1.09528e-05	7.8412e-05
gene-galnt6	765.729	-3.92715	0.612891	-6.40758	1.4785e-10	3.57107e-09
gene-mycla	2089.79	-3.9263	0.485974	-8.07924	6.51702e-16	3.85917e-14
gene-calub	249.581	-3.92365	0.850102	-4.6155	3.92142e-06	3.1992e-05
gene-dhrs13a.2	758.037	-3.92254	0.62521	-6.27396	3.51988e-10	8.01514e-09
gene-fhdc2	620.073	-3.9207	0.642673	-6.10062	1.05655e-09	2.17446e-08
gene-LOC566194	267.701	-3.91911	0.661029	-5.9288	3.05161e-09	5.6823e-08
gene-dnajc25-2	54.9418	-3.91751	0.922412	-4.24703	2.16623e-05	0.000142324
gene-casd1	1031.54	-3.91221	0.635884	-6.15239	7.63244e-10	1.62539e-08
gene-tmem160	214.766	-3.90209	0.624245	-6.25089	4.08119e-10	9.19179e-09
gene-si:dkey-245n4.2	31.2708	-3.89982	1.13302	-3.44197	0.000577485	0.00242454
gene-mfsd4aa	670.552	-3.88777	0.544886	-7.13502	9.6776e-13	3.46742e-11
gene-tmem70	859.463	-3.88413	0.546426	-7.10823	1.17539e-12	4.17833e-11
gene-tomm70a-2	61.6334	-3.88171	1.02784	-3.77656	0.000159008	0.000804619
gene-cax1	1252.21	-3.87893	0.803877	-4.82528	1.39805e-06	1.29791e-05
gene-si:dkey-104n9.1	43.459	-3.87849	1.0656	-3.63974	0.000272918	0.00128312
gene-hsd17b12a	844.787	-3.87805	0.710216	-5.46037	4.75132e-08	6.47985e-07
gene-tdgf1	406.872	-3.8776	0.691201	-5.60995	2.02388e-08	3.08272e-07
gene-tram1-2	585.652	-3.87611	1.19875	-3.23345	0.00122304	0.00460544
gene-si:dkeyp-120h9.1	114.297	-3.87448	0.904123	-4.28535	1.82454e-05	0.000122175
gene-srgap3	53.672	-3.87414	1.04697	-3.70033	0.00021532	0.00104571
gene-si:ch211-222h17.9	55.5704	-3.87145	1.00706	-3.84432	0.000120888	0.000634074
gene-zgc:56628	142.907	-3.86603	0.736441	-5.2496	1.52426e-07	1.81281e-06
gene-pdia4	4166.41	-3.85075	0.506478	-7.60299	2.89358e-14	1.37871e-12
gene-sh3gl1a	868.089	-3.84822	0.522602	-7.36358	1.79041e-13	7.4371e-12
gene-rarab	148.177	-3.84129	0.707884	-5.42644	5.74894e-08	7.60711e-07
gene-mgarp	229.265	-3.8411	0.621545	-6.17992	6.41325e-10	1.39056e-08
gene-gba3	163.047	-3.84033	0.660142	-5.81743	5.97595e-09	1.04338e-07
gene-dctpp1	152.869	-3.84002	1.19681	-3.20856	0.00133402	0.00495829
gene-fasn	100.436	-3.83864	0.770986	-4.97887	6.3957e-07	6.5076e-06
gene-pcgf3	84.832	-3.83782	0.837683	-4.58147	4.61713e-06	3.6979e-05
gene-rcc1	2564.16	-3.83777	0.499568	-7.68217	1.56417e-14	7.69532e-13
gene-rab3db	276.652	-3.82797	0.624714	-6.12755	8.92449e-10	1.86723e-08
gene-pik3ip1	1059.87	-3.82756	0.559927	-6.83582	8.15366e-12	2.50237e-10
gene-snapc1a	372.182	-3.82755	0.592073	-6.46466	1.01529e-10	2.53042e-09
gene-atg16l1	96.3611	-3.82594	0.745129	-5.1346	2.82743e-07	3.13729e-06
gene-LOC108180337	68.553	-3.82182	1.05419	-3.62537	0.000288546	0.00134434
gene-pus3	1180.4	-3.8212	0.521795	-7.32317	2.42175e-13	9.75581e-12
gene-si:dkey-16p21.8	432.189	-3.82008	0.905873	-4.21702	2.47556e-05	0.000160142
gene-fgd4b	326.579	-3.81894	0.84844	-4.50114	6.7591e-06	5.14868e-05
gene-si:ch211-207i20.2	60.6859	-3.81887	0.950872	-4.01618	5.9149e-05	0.000341088
gene-aifm4	282.635	-3.80441	0.723173	-5.26072	1.43496e-07	1.72104e-06
gene-xrn2	2344.64	-3.80271	0.540744	-7.03235	2.0308e-12	6.92608e-11
gene-znf503	273.539	-3.80077	0.890698	-4.26719	1.97952e-05	0.00013135
gene-zgc:110239	3232.25	-3.79926	0.489868	-7.75568	8.78705e-15	4.48852e-13
gene-mgat4b	352.861	-3.79918	0.733932	-5.17648	2.26109e-07	2.56921e-06
gene-pygl	787.652	-3.7983	0.868269	-4.37457	1.21673e-05	8.59136e-05
gene-rnf11b	225.23	-3.79659	0.611764	-6.20597	5.43603e-10	1.19931e-08
gene-mcoln3b	634.776	-3.79434	0.636993	-5.95664	2.57473e-09	4.88503e-08
gene-fam65b	128.562	-3.79429	0.805991	-4.70761	2.50635e-06	2.15809e-05
gene-zgc:172323	114.651	-3.79378	1.16434	-3.25832	0.00112076	0.00428575
gene-cdt1	1868.88	-3.79275	0.695737	-5.45142	4.99689e-08	6.76594e-07
gene-pskh1-2	93.1624	-3.7914	1.00269	-3.78124	0.000156051	0.000792838
gene-dennd2db	761.1	-3.79135	0.688771	-5.50451	3.70189e-08	5.25399e-07
gene-npm2a	362.375	-3.78202	0.677121	-5.58544	2.33108e-08	3.50358e-07
gene-dia1b	357.151	-3.77858	0.672428	-5.61931	1.91723e-08	2.942e-07
gene-cpdb	1111.2	-3.77702	0.511228	-7.38814	1.489e-13	6.30048e-12
gene-lmx1a	386.364	-3.77582	0.568019	-6.64734	2.9843e-11	8.18426e-10
gene-mob2a	45.3799	-3.77363	1.06746	-3.53514	0.000407557	0.00180183
gene-prkcha	258.782	-3.77014	0.617848	-6.10206	1.0471e-09	2.15893e-08
gene-ddx28-2	438.681	-3.76723	0.863624	-4.36212	1.2881e-05	9.03899e-05
gene-unc5db	47.0711	-3.76302	0.97847	-3.84583	0.000120147	0.00063092
gene-abhd6b	60.9536	-3.76263	0.968805	-3.88379	0.000102841	0.000550754
gene-LOC108182821	44.3646	-3.76049	1.00182	-3.75366	0.000174269	0.000871343
gene-rhoq	144.188	-3.7589	0.955324	-3.93469	8.33054e-05	0.000458028
gene-si:dkeyp-114g9.1	392.932	-3.75768	0.833259	-4.50962	6.49433e-06	4.97303e-05
gene-neu3.2	54.6661	-3.75663	0.904372	-4.15385	3.26925e-05	0.000204599
gene-mpdz	64.7336	-3.75336	1.0911	-3.43999	0.000581728	0.00243874
gene-zgc:114123	1760.03	-3.75335	0.53997	-6.95103	3.6263e-12	1.18679e-10
gene-ecd-2	366.178	-3.75105	0.601977	-6.23121	4.62848e-10	1.03219e-08
gene-si:dkey-3k20.4	60.6247	-3.74993	0.910749	-4.11742	3.83145e-05	0.000234288
gene-hhat	82.6723	-3.74918	0.85707	-4.37442	1.21758e-05	8.59469e-05
gene-foxo3a	323.911	-3.74176	0.58495	-6.39671	1.58762e-10	3.81432e-09
gene-ripk2	112.021	-3.73808	0.858536	-4.35401	1.33668e-05	9.32511e-05
gene-LOC553492	701.509	-3.73531	0.519714	-7.18724	6.61147e-13	2.43818e-11
gene-lmcd1	303.424	-3.7339	0.608641	-6.13482	8.5258e-10	1.79208e-08
gene-gpr180	72.3946	-3.73102	0.913501	-4.08431	4.42087e-05	0.000265252
gene-uncx4.1	137.711	-3.73048	0.683034	-5.46164	4.71756e-08	6.44544e-07
gene-tmem243a	97.0265	-3.7277	0.732398	-5.08972	3.58586e-07	3.86537e-06
gene-gyg1a	6686.94	-3.72437	0.568372	-6.5527	5.65055e-11	1.48671e-09
gene-polr3g	85.3381	-3.71978	0.920936	-4.03913	5.36501e-05	0.000312756
gene-chchd4a	89.3944	-3.71971	0.884732	-4.20433	2.61859e-05	0.000168463
gene-ctu1	588.983	-3.71923	0.573848	-6.48121	9.09914e-11	2.29809e-09
gene-zcchc6	97.8176	-3.71617	0.831931	-4.46692	7.9352e-06	5.92397e-05
gene-etv5a-3	314.203	-3.71494	1.05149	-3.53302	0.000410848	0.00181532
gene-fzd5	45.7032	-3.71175	1.13691	-3.26478	0.00109548	0.00420754
gene-fig4b	40.3911	-3.71111	1.03568	-3.58324	0.000339354	0.00153931
gene-bokb	464.909	-3.70678	0.544257	-6.81071	9.71158e-12	2.93678e-10
gene-zgc:66443	616.927	-3.70509	0.618709	-5.98842	2.11889e-09	4.09339e-08
gene-ctif	38.9723	-3.69992	1.07782	-3.43277	0.00059745	0.00249497
gene-mfsd1	151.005	-3.69787	0.836082	-4.42285	9.7406e-06	7.09659e-05
gene-pes	149.907	-3.68924	0.654411	-5.6375	1.72532e-08	2.67648e-07
gene-si:ch211-202f5.3-2	533.598	-3.68827	0.545208	-6.76488	1.3342e-11	3.9095e-10
gene-lig1	85.1222	-3.68755	0.926858	-3.97855	6.9337e-05	0.000389924
gene-dnajc14	389.918	-3.68754	0.842254	-4.37819	1.19671e-05	8.46845e-05
gene-mid1ip1l	5433.1	-3.68558	0.544422	-6.7697	1.29046e-11	3.80099e-10
gene-si:dkey-91m3.1	49.4871	-3.68436	0.944748	-3.89983	9.62602e-05	0.000520673
gene-LOC103909967	354.744	-3.68005	1.20746	-3.04777	0.00230548	0.00788853
gene-si:dkey-153k10.7-2	56.8555	-3.67486	0.913683	-4.02203	5.76993e-05	0.00033359
gene-fgfr1b	49.1676	-3.67473	0.947999	-3.8763	0.000106057	0.000565351
gene-hid1b	572.81	-3.67379	0.587453	-6.25377	4.00657e-10	9.06317e-09
gene-LOC101882208	41.981	-3.6708	1.14801	-3.19753	0.00138611	0.00512923
gene-klhl12	120.902	-3.67036	0.802635	-4.57289	4.81053e-06	3.82952e-05
gene-fscn1a	600.126	-3.66858	0.972134	-3.77374	0.000160821	0.000812703
gene-smpd1	198.196	-3.66853	0.633881	-5.78741	7.1479e-09	1.22258e-07
gene-LOC100535213	260.044	-3.66849	0.85501	-4.29058	1.78204e-05	0.000119824
gene-klhl18	118.741	-3.6679	0.694361	-5.28241	1.27496e-07	1.54631e-06
gene-setd4	2366.89	-3.6653	0.487891	-7.51253	5.79945e-14	2.64119e-12
gene-fastk	212.072	-3.66424	0.679623	-5.39158	6.98404e-08	9.07206e-07
gene-LOC100334439	1056.71	-3.65718	0.788156	-4.64018	3.48109e-06	2.87095e-05
gene-zgc:77151	427.038	-3.65459	0.641979	-5.69269	1.25055e-08	2.00583e-07
gene-zgc:174164	218.794	-3.65434	0.61578	-5.93449	2.94768e-09	5.50233e-08
gene-st6gal2b	215.694	-3.65431	0.855848	-4.26981	1.95637e-05	0.000129928
gene-abat	292.026	-3.65431	0.580961	-6.2901	3.17253e-10	7.26798e-09
gene-ankrd22	514.405	-3.65018	0.567702	-6.42976	1.27809e-10	3.14736e-09
gene-slc1a5	84.5364	-3.64947	0.786001	-4.64309	3.43241e-06	2.8401e-05
gene-LOC101884923	228.875	-3.64273	0.668529	-5.44888	5.06889e-08	6.84301e-07
gene-smcr8a	410.156	-3.64104	0.614949	-5.92088	3.20224e-09	5.94815e-08
gene-ccne1-2	132.326	-3.64104	0.780872	-4.66279	3.11951e-06	2.61458e-05
gene-zp2l2	224.826	-3.63886	0.841433	-4.3246	1.52809e-05	0.000104483
gene-znf385c	85.3307	-3.63831	0.760743	-4.78257	1.73072e-06	1.56323e-05
gene-slitrk5b	195.473	-3.63747	0.902677	-4.02964	5.58616e-05	0.000324274
gene-slc6a16b	253.776	-3.63717	0.612879	-5.93457	2.94615e-09	5.50233e-08
gene-bicc1a-2	67.8946	-3.63491	0.856654	-4.24315	2.20406e-05	0.000144558
gene-slc46a1	328.097	-3.63346	0.746606	-4.86664	1.13512e-06	1.08125e-05
gene-si:dkeyp-34c12.1-2	145.674	-3.63136	1.02542	-3.54135	0.000398089	0.00176582
gene-LOC100332443	486.535	-3.63038	0.808269	-4.49155	7.0708e-06	5.35118e-05
gene-ccdc130	441.589	-3.62847	0.813592	-4.45982	8.20295e-06	6.09976e-05
gene-arsb	88.6416	-3.62735	0.759422	-4.77646	1.78409e-06	1.60377e-05
gene-xpo5	216.953	-3.62405	0.691563	-5.24037	1.60253e-07	1.89299e-06
gene-tgfa	165.69	-3.62135	0.650759	-5.56481	2.62432e-08	3.88003e-07
gene-fbxo43	2095.71	-3.6135	0.5206	-6.94104	3.89228e-12	1.2593e-10
gene-zgc:66024	940.639	-3.61264	0.545429	-6.62348	3.50837e-11	9.54075e-10
gene-pop1	335.936	-3.61251	0.597181	-6.04926	1.45508e-09	2.91309e-08
gene-si:ch211-10d23.5	316.111	-3.60913	0.616145	-5.85759	4.69633e-09	8.42664e-08
gene-pycr3	123.974	-3.6066	1.0277	-3.50939	0.000449137	0.00196498
gene-gata2b	42.374	-3.60546	1.15295	-3.12717	0.00176496	0.00630289
gene-gys2	188.992	-3.60195	0.855198	-4.21183	2.5331e-05	0.000163352
gene-LOC100535500	117.624	-3.59975	0.787862	-4.56901	4.9004e-06	3.89014e-05
gene-slc38a11	248.817	-3.59774	0.597371	-6.02263	1.7161e-09	3.39035e-08
gene-efr3ba	46.5359	-3.59502	0.989636	-3.63267	0.000280505	0.00131308
gene-chordc1a	117.495	-3.59186	0.698677	-5.14095	2.73358e-07	3.04059e-06
gene-aplnr2	86.0205	-3.58954	0.871458	-4.11901	3.8051e-05	0.000232865
gene-unc5c	69.5672	-3.58318	0.810348	-4.42178	9.78894e-06	7.12952e-05
gene-ppp1r14aa	493.225	-3.5812	0.597475	-5.99389	2.04877e-09	3.97055e-08
gene-si:ch211-198a12.6-2	518.521	-3.57827	1.1691	-3.0607	0.00220824	0.00761601
gene-ppp1r3b-3	146.516	-3.57636	1.02328	-3.49499	0.000474081	0.00205194
gene-jmjd6	253.17	-3.57339	0.796907	-4.48407	7.32314e-06	5.51423e-05
gene-parn	3573.51	-3.57102	0.478387	-7.46472	8.34788e-14	3.67631e-12
gene-axin2	255.364	-3.56811	0.716301	-4.9813	6.31578e-07	6.43784e-06
gene-prmt9	332.744	-3.56487	0.629997	-5.65856	1.52652e-08	2.39927e-07
gene-btr12	60.4633	-3.56051	0.894135	-3.98208	6.83158e-05	0.00038504
gene-pacs1a-2	55.6388	-3.55923	0.975696	-3.64789	0.000264406	0.00124984
gene-b3galt6	59.5938	-3.55677	1.07244	-3.31652	0.000911473	0.00359392
gene-rnf217	70.4327	-3.55344	0.810902	-4.38209	1.17548e-05	8.34428e-05
gene-si:dkey-42i9.8	386.724	-3.55322	0.753583	-4.7151	2.41595e-06	2.09216e-05
gene-zgc:162936	180.792	-3.55298	0.861177	-4.12572	3.6957e-05	0.000227458
gene-si:ch211-189e2.3	56.6268	-3.55293	0.976216	-3.6395	0.000273173	0.00128397
gene-LOC110439961	30.6753	-3.55291	1.139	-3.11931	0.00181274	0.00644604
gene-si:ch73-204p21.2	380.556	-3.55096	0.649629	-5.46613	4.59972e-08	6.31536e-07
gene-si:ch211-175m2.5-2	47.0331	-3.54539	1.10776	-3.2005	0.0013719	0.00508326
gene-zgc:165453	251.609	-3.54278	0.872923	-4.05852	4.93845e-05	0.000291824
gene-slc19a2	56.6288	-3.54086	0.853504	-4.14861	3.34501e-05	0.000208535
gene-st6gal1	219.153	-3.54004	0.699448	-5.0612	4.16625e-07	4.42578e-06
gene-ches1	32.5595	-3.53946	1.12359	-3.15013	0.001632	0.00590235
gene-tctex1d4	25.9961	-3.53687	1.18816	-2.97676	0.00291309	0.00956654
gene-pcyox1	150.73	-3.53633	0.686402	-5.15198	2.5775e-07	2.89825e-06
gene-pvrl3b	293.292	-3.52477	0.822604	-4.28489	1.82826e-05	0.000122351
gene-myh9a	2604.33	-3.52333	0.791536	-4.45126	8.53694e-06	6.31705e-05
gene-apbb1	66.8815	-3.5221	0.816696	-4.31262	1.61332e-05	0.000109814
gene-LOC568037	104.059	-3.51954	0.986131	-3.56904	0.000358289	0.00161326
gene-gss	153.116	-3.51941	0.64983	-5.4159	6.09816e-08	8.01775e-07
gene-foxq1b	53.6606	-3.51736	1.11181	-3.16362	0.00155821	0.0056726
gene-wee2	560.681	-3.51448	1.11154	-3.16181	0.00156794	0.00570185
gene-pard3ab	327.833	-3.51319	0.646875	-5.43102	5.60329e-08	7.42544e-07
gene-LOC100331115	44.6365	-3.5102	0.970581	-3.61659	0.000298507	0.00138392
gene-zgc:113294	168.505	-3.50875	0.773508	-4.53615	5.72907e-06	4.44984e-05
gene-xpo4	69.2062	-3.50846	1.07317	-3.26926	0.00107831	0.00415072
gene-rnf13	134.535	-3.50699	0.787061	-4.45581	8.35784e-06	6.19869e-05
gene-zgc:103510	29.758	-3.50675	1.14632	-3.05913	0.0022198	0.00764889
gene-pon3.2	471.637	-3.50562	0.632867	-5.53927	3.03734e-08	4.41078e-07
gene-ap1g2	157.766	-3.50328	0.639819	-5.47541	4.36489e-08	6.07119e-07
gene-slc25a51b	314.446	-3.49865	0.820128	-4.26598	1.99025e-05	0.000131985
gene-slc39a13	179.54	-3.49558	0.796362	-4.38944	1.13645e-05	8.10013e-05
gene-cap1	1163.28	-3.49327	0.591133	-5.90945	3.43255e-09	6.3396e-08
gene-uck2a-2	277.689	-3.49207	0.875452	-3.98888	6.63868e-05	0.000375943
gene-ctnnal1	31.389	-3.48578	1.14086	-3.05541	0.00224755	0.00772575
gene-zdhhc8b	170.642	-3.48322	0.676544	-5.14855	2.62504e-07	2.94295e-06
gene-aldh18a1	1637.27	-3.47964	0.496329	-7.01074	2.37054e-12	8.04848e-11
gene-prickle3	155.73	-3.47709	0.742509	-4.68289	2.82853e-06	2.40266e-05
gene-kbtbd4-2	42.384	-3.47667	0.99508	-3.49386	0.000476095	0.00205908
gene-etv5b	298.396	-3.47659	0.870746	-3.99266	6.53368e-05	0.000371109
gene-cacna2d3a	41.1641	-3.47566	1.09969	-3.1606	0.00157446	0.00572165
gene-si:ch211-195b11.7	104.074	-3.46752	0.734153	-4.72315	2.32218e-06	2.0241e-05
gene-zgc:66455	405.518	-3.46354	0.601507	-5.7581	8.5064e-09	1.42066e-07
gene-si:dkeyp-2e4.2	258.142	-3.46291	0.586982	-5.89951	3.64594e-09	6.69011e-08
gene-LOC100005008	110.836	-3.46043	0.847373	-4.08371	4.43224e-05	0.000265864
gene-ostf1-2	56.8381	-3.46023	0.908065	-3.81055	0.000138658	0.000715042
gene-tbc1d16	444.631	-3.45839	0.532826	-6.49065	8.54656e-11	2.17062e-09
gene-cldnd1a	200.714	-3.45767	0.671731	-5.1474	2.6412e-07	2.95763e-06
gene-fam73b	138.785	-3.4552	0.743961	-4.64433	3.41185e-06	2.82618e-05
gene-zdhhc18b	535.013	-3.45205	0.557794	-6.18875	6.06433e-10	1.32122e-08
gene-shdb	222.599	-3.45135	0.859478	-4.01563	5.92862e-05	0.000341793
gene-gpc2	135.128	-3.4495	0.92645	-3.72335	0.000196594	0.000966143
gene-si:ch211-59d15.9	319.812	-3.44873	0.64741	-5.32697	9.98671e-08	1.2377e-06
gene-rassf9	36.2142	-3.44785	1.01118	-3.40973	0.000650266	0.00268488
gene-nobox	46.0986	-3.44554	1.08827	-3.16607	0.00154514	0.00563044
gene-cul1a	276.041	-3.44516	0.706215	-4.87835	1.06978e-06	1.02677e-05
gene-satb1a	92.7473	-3.4445	0.727871	-4.73229	2.21998e-06	1.94473e-05
gene-atp8a1	55.8858	-3.44411	0.903394	-3.81242	0.000137614	0.000710631
gene-gemin4-2	262.314	-3.44121	0.666974	-5.15944	2.47693e-07	2.79347e-06
gene-homer2	88.9346	-3.44057	0.80531	-4.27235	1.93424e-05	0.000128587
gene-tspan36	444.708	-3.43863	0.647745	-5.30862	1.10459e-07	1.35858e-06
gene-sh3yl1-2	64.5121	-3.43816	1.10181	-3.12047	0.00180562	0.00642478
gene-pdgfd	90.5459	-3.43794	0.846325	-4.06219	4.86137e-05	0.000288175
gene-zbtb2a	593.273	-3.43222	0.751361	-4.568	4.92398e-06	3.90612e-05
gene-mettl21a	592.977	-3.42868	0.539225	-6.35853	2.03688e-10	4.78719e-09
gene-zgc:165514	283.724	-3.4283	0.716608	-4.78406	1.71792e-06	1.55352e-05
gene-rab11al	85.1203	-3.42808	1.10428	-3.10436	0.00190692	0.00673136
gene-LOC100002814	30.5652	-3.42672	1.07903	-3.17574	0.00149455	0.00547778
gene-pvrl1b	41.0078	-3.42465	0.948839	-3.60931	0.000307017	0.00141787
gene-zgc:195081	45.0194	-3.42201	0.954441	-3.58535	0.000336624	0.00152938
gene-ankha	378.132	-3.42027	0.575566	-5.94244	2.80812e-09	5.27219e-08
gene-LOC100536708	45.9263	-3.41458	1.04333	-3.27278	0.00106495	0.00410766
gene-elmo1	198.835	-3.40856	0.622826	-5.47274	4.4313e-08	6.14687e-07
gene-zc3h18-2	62.1874	-3.40667	0.951581	-3.58001	0.000343583	0.001556
gene-zgc:162928	79.4307	-3.40566	0.773191	-4.40468	1.0594e-05	7.61656e-05
gene-baiap2l1b	563.042	-3.40292	0.661041	-5.14782	2.63527e-07	2.95296e-06
gene-mrps36	76.4332	-3.39793	0.844808	-4.02213	5.76734e-05	0.00033359
gene-baiap2l1a	363.53	-3.39411	0.5564	-6.10012	1.05986e-09	2.17929e-08
gene-ptcd1	381.808	-3.39402	0.666032	-5.09588	3.47124e-07	3.7543e-06
gene-gpr160	339.381	-3.39148	0.594111	-5.7085	1.13977e-08	1.84906e-07
gene-wsb2	56.5114	-3.3886	0.922457	-3.67346	0.000239291	0.00114666
gene-crsp7	834.268	-3.38834	0.585999	-5.78216	7.37462e-09	1.25757e-07
gene-fam169ab-2	56.8931	-3.38737	1.08905	-3.11039	0.0018684	0.00661598
gene-pex11b	204.861	-3.38579	1.12007	-3.02285	0.0025041	0.00844003
gene-trpn1	64.5047	-3.38197	0.892254	-3.79037	0.000150426	0.000767183
gene-slc25a44a	135.805	-3.3775	0.722425	-4.67523	2.9362e-06	2.4876e-05
gene-wdr47b	257.478	-3.37671	0.704349	-4.79409	1.63417e-06	1.48967e-05
gene-fbxl18	166.907	-3.37541	0.845588	-3.99179	6.55752e-05	0.00037209
gene-sema6e	80.7564	-3.37462	0.832765	-4.05231	5.07152e-05	0.000298465
gene-marveld2b	118.504	-3.37364	0.800671	-4.21352	2.51425e-05	0.00016232
gene-rnf152	45.6166	-3.36857	1.09681	-3.07126	0.00213157	0.0073898
gene-LOC110438156	164.385	-3.36575	0.814987	-4.12983	3.63038e-05	0.000223985
gene-LOC101886419	647.979	-3.36542	0.605409	-5.55892	2.71456e-08	4.0004e-07
gene-lmbr1l	47.9085	-3.36269	1.00428	-3.34835	0.000812944	0.00325982
gene-si:dkey-6e2.2	112.086	-3.35956	0.787852	-4.2642	2.00618e-05	0.000132925
gene-hmgb3b	1630.9	-3.35411	0.516182	-6.49792	8.14369e-11	2.0776e-09
gene-LOC100333111	318.95	-3.35146	0.964803	-3.47372	0.000513292	0.0021936
gene-adck4	43.3857	-3.35104	1.02464	-3.27046	0.00107375	0.00413596
gene-tom1	514.577	-3.3503	0.628491	-5.33071	9.78303e-08	1.21578e-06
gene-LOC110438429	73.8855	-3.34911	0.965272	-3.4696	0.000521233	0.00222419
gene-si:ch73-366l1.5	195.958	-3.34691	0.75944	-4.40708	1.04775e-05	7.54619e-05
gene-ggps1	1137.7	-3.34614	0.610036	-5.48515	4.13124e-08	5.78731e-07
gene-trmo	338.491	-3.34516	0.556769	-6.00816	1.87638e-09	3.67181e-08
gene-ppp4ca	1129.55	-3.34449	0.498894	-6.70382	2.03041e-11	5.77064e-10
gene-zgc:162958	70.5995	-3.34433	0.843295	-3.96579	7.31524e-05	0.000408644
gene-tspan36-2	640.272	-3.33643	0.635195	-5.25262	1.49954e-07	1.78903e-06
gene-abhd15a-2	75.1989	-3.3358	0.957659	-3.48329	0.000495289	0.00212911
gene-gpc1b	363.183	-3.33498	0.618216	-5.39453	6.87023e-08	8.93958e-07
gene-zgc:101562	209.194	-3.33157	0.608769	-5.47263	4.43399e-08	6.14687e-07
gene-prkg1a	37.3157	-3.33019	1.02683	-3.24317	0.0011821	0.00447802
gene-dnmt1	5926.6	-3.32971	0.495608	-6.71844	1.83684e-11	5.26005e-10
gene-agps	671.894	-3.32896	0.713314	-4.66689	3.05788e-06	2.57243e-05
gene-vps54	249.8	-3.32739	0.579484	-5.74199	9.35678e-09	1.55125e-07
gene-si:ch211-226l4.6	1219.77	-3.32429	0.700619	-4.74479	2.08721e-06	1.84507e-05
gene-frmd6	274.328	-3.322	0.720238	-4.61237	3.98097e-06	3.24079e-05
gene-znf395a	812.158	-3.31628	0.516728	-6.41784	1.38218e-10	3.36713e-09
gene-mgat3a	142.983	-3.31535	0.831201	-3.98863	6.64564e-05	0.000376244
gene-pdcd4b	60.6441	-3.31495	0.883239	-3.75318	0.000174609	0.00087266
gene-adcy5	175.559	-3.31433	0.805783	-4.11317	3.90258e-05	0.000238188
gene-rab33ba	180.312	-3.31208	0.633152	-5.23109	1.68512e-07	1.9792e-06
gene-dnajc15	145.092	-3.30975	0.649879	-5.09288	3.52663e-07	3.80695e-06
gene-si:dkey-256h2.1	1803.15	-3.30684	0.582539	-5.6766	1.37401e-08	2.18531e-07
gene-zgc:101800	290.091	-3.30605	0.626293	-5.27876	1.30059e-07	1.57319e-06
gene-lrig1	118.761	-3.30494	0.763795	-4.32699	1.51158e-05	0.000103598
gene-ccnb1	5164.57	-3.30227	0.700937	-4.71123	2.46229e-06	2.12499e-05
gene-slc5a5	91.6429	-3.30049	0.775361	-4.25671	2.07457e-05	0.000136936
gene-bard1	399.962	-3.2978	0.724627	-4.55103	5.33836e-06	4.18796e-05
gene-rtkn2b	398.5	-3.29767	0.548129	-6.01622	1.78532e-09	3.51787e-08
gene-tmem62	100.939	-3.29707	0.721853	-4.56751	4.93554e-06	3.91391e-05
gene-haus6	1397.07	-3.2944	0.673765	-4.88953	1.01075e-06	9.78393e-06
gene-gdpd5a	203.042	-3.28977	0.612709	-5.36922	7.90782e-08	1.01042e-06
gene-taf5l	630.056	-3.2885	0.63897	-5.14655	2.65314e-07	2.96712e-06
gene-zgc:101130	54.9676	-3.28752	0.972518	-3.38042	0.000723761	0.00294702
gene-tmem164	52.2088	-3.2859	0.939268	-3.49837	0.000468113	0.0020327
gene-atic	933.16	-3.28319	0.691994	-4.74454	2.08984e-06	1.84642e-05
gene-btg3-2	317.408	-3.27991	0.842642	-3.89241	9.92529e-05	0.000533931
gene-tatdn2	1311.53	-3.27904	0.70414	-4.65681	3.2115e-06	2.68078e-05
gene-traf3ip2a	56.9302	-3.27622	0.964463	-3.39694	0.000681449	0.00279885
gene-slc2a8	121.192	-3.27511	0.891515	-3.67365	0.000239112	0.00114604
gene-itchb	50.2095	-3.27379	0.972817	-3.36527	0.000764691	0.00309148
gene-elovl4b	139.699	-3.271	0.712555	-4.59052	4.42143e-06	3.56227e-05
gene-seh1l	593.984	-3.26742	0.623888	-5.23719	1.63038e-07	1.92189e-06
gene-pacs2	84.4752	-3.26483	0.820271	-3.98018	6.88622e-05	0.000387638
gene-exoc5	300.632	-3.26338	0.892966	-3.65453	0.000257649	0.00122121
gene-sema5a	85.0017	-3.26321	0.878017	-3.71657	0.000201945	0.000988587
gene-slc35e2b	66.438	-3.2631	0.995167	-3.27895	0.00104196	0.00403408
gene-mnta	168.841	-3.26079	0.653875	-4.98686	6.1368e-07	6.2808e-06
gene-cntf	49.2253	-3.25982	0.945143	-3.44902	0.000562631	0.00237271
gene-sh3d21	538.373	-3.25973	0.673892	-4.83717	1.31699e-06	1.23172e-05
gene-si:ch73-166o21.1	72.2564	-3.2571	0.791792	-4.11358	3.89573e-05	0.000237833
gene-tnfrsf1b	98.0166	-3.2567	0.794491	-4.09911	4.14749e-05	0.000251303
gene-zgc:92591	572.999	-3.25519	0.556041	-5.85422	4.79262e-09	8.56553e-08
gene-trim9	196.239	-3.25356	0.617455	-5.2693	1.36943e-07	1.6468e-06
gene-ecd	87.3076	-3.25259	0.742576	-4.38014	1.18602e-05	8.40589e-05
gene-zmym2	68.4155	-3.25086	0.884397	-3.67579	0.000237113	0.00113814
gene-slc25a44b	149.372	-3.25035	0.701157	-4.63569	3.55747e-06	2.92649e-05
gene-nxph1	58.8771	-3.2485	0.913681	-3.5554	0.000377408	0.00168642
gene-usp16	646.007	-3.24821	0.594219	-5.46636	4.59375e-08	6.31432e-07
gene-dhcr24	141.541	-3.24562	0.682873	-4.75289	2.00533e-06	1.77938e-05
gene-pgs1	150.052	-3.24561	0.723618	-4.48526	7.28266e-06	5.48558e-05
gene-si:dkey-206p8.1	60.2237	-3.24125	0.872021	-3.71694	0.000201648	0.000987985
gene-zgc:194215	61.261	-3.24085	1.03072	-3.14427	0.00166502	0.00600553
gene-nsun4	295.003	-3.23985	0.607172	-5.33598	9.50324e-08	1.1849e-06
gene-mrpl1-2	312.199	-3.23867	0.832345	-3.89102	9.98245e-05	0.000536371
gene-dscc1	682.372	-3.23247	0.518677	-6.23213	4.60126e-10	1.02713e-08
gene-si:ch211-167b20.8	1418.56	-3.23206	0.608569	-5.31093	1.0907e-07	1.3444e-06
gene-slc9a7	473.39	-3.23182	0.568954	-5.68027	1.34479e-08	2.14335e-07
gene-fbxl17	41.7287	-3.23135	0.942901	-3.42703	0.000610213	0.00253985
gene-ccser2a-2	91.4065	-3.23054	0.755117	-4.2782	1.88414e-05	0.000125573
gene-zfyve9a	228.135	-3.22832	0.691235	-4.67036	3.00677e-06	2.53602e-05
gene-tbrg1	467.515	-3.22813	0.526756	-6.12831	8.88154e-10	1.85996e-08
gene-pprc1	1889.15	-3.22725	0.564056	-5.7215	1.0559e-08	1.72659e-07
gene-zgc:101765	130.493	-3.2271	0.774749	-4.16535	3.10869e-05	0.000195823
gene-bcl2l13-2	182.715	-3.22586	0.855238	-3.77189	0.000162016	0.000817653
gene-tshz3a	83.8419	-3.22435	0.869276	-3.70924	0.000207885	0.00101372
gene-pygb-2	518.437	-3.21972	0.531254	-6.06061	1.3561e-09	2.72663e-08
gene-rpusd2	347.516	-3.2189	0.658049	-4.89158	1.00032e-06	9.69126e-06
gene-hyou1	2740	-3.2171	0.516639	-6.22699	4.75493e-10	1.05831e-08
gene-itprip	378.179	-3.21688	0.906262	-3.54961	0.000385796	0.00171801
gene-zgc:91908	551.159	-3.21656	0.563578	-5.70739	1.14722e-08	1.85718e-07
gene-naglu	53.0017	-3.21618	1.02917	-3.125	0.00177802	0.00634149
gene-zgc:154064	258.195	-3.21599	0.569748	-5.64459	1.65571e-08	2.58011e-07
gene-lhx8a	817.305	-3.21472	0.639386	-5.02783	4.96072e-07	5.18714e-06
gene-LOC100333048	159.062	-3.21376	0.648361	-4.95675	7.16836e-07	7.20643e-06
gene-atp2a2a	435.663	-3.21096	0.616739	-5.20636	1.92584e-07	2.23417e-06
gene-katna1	459.014	-3.21049	0.583431	-5.50278	3.73852e-08	5.29605e-07
gene-arhgef28	103.138	-3.20822	0.799846	-4.01105	6.04494e-05	0.000347452
gene-hcst	49.8051	-3.20821	0.918823	-3.49165	0.000480039	0.00207416
gene-raph1a	52.2157	-3.20765	0.959523	-3.34296	0.0008289	0.00331534
gene-uprt	182.252	-3.20507	0.647788	-4.94771	7.50903e-07	7.51566e-06
gene-zgc:171965	71.0591	-3.20373	0.866123	-3.69893	0.000216506	0.00105034
gene-wdr73	132.843	-3.20282	1.07131	-2.98962	0.00279321	0.00923872
gene-inadl	365.308	-3.20268	0.682534	-4.69233	2.70105e-06	2.3056e-05
gene-polr2ea	101.102	-3.20138	0.798056	-4.01147	6.03428e-05	0.00034709
gene-smyd5	592.741	-3.20035	0.53658	-5.96434	2.45631e-09	4.67751e-08
gene-mboat1	47.4016	-3.19818	1.05621	-3.02798	0.00246195	0.008319
gene-macc1	433.075	-3.19767	0.711003	-4.4974	6.87883e-06	5.22477e-05
gene-galnt12	79.373	-3.19669	0.76573	-4.1747	2.98383e-05	0.000189032
gene-gbgt1l2	34.8976	-3.19532	1.02119	-3.12901	0.00175399	0.00627058
gene-nars2	461.206	-3.19147	0.626301	-5.09574	3.47375e-07	3.75522e-06
gene-zgc:152986	1727.26	-3.19114	0.513804	-6.21082	5.27103e-10	1.16517e-08
gene-sb:cb288	559.348	-3.19032	0.544839	-5.85553	4.75501e-09	8.51845e-08
gene-aak1a	228.521	-3.18917	0.631503	-5.05012	4.41531e-07	4.66415e-06
gene-gnai2b	262.676	-3.18544	0.576721	-5.52336	3.3257e-08	4.77083e-07
gene-sardh	83.6346	-3.18415	0.862139	-3.69331	0.00022135	0.00107109
gene-LOC101885164	1359.83	-3.18144	0.638529	-4.98246	6.27825e-07	6.40246e-06
gene-si:ch211-11k18.4	1469.92	-3.17797	0.648169	-4.903	9.43854e-07	9.21111e-06
gene-LOC100003133	76.7574	-3.17678	0.884407	-3.59198	0.00032817	0.00149877
gene-senp8	65.211	-3.17506	0.813769	-3.90167	9.55299e-05	0.000517339
gene-ninl	1246.92	-3.17471	0.521571	-6.08683	1.15172e-09	2.34312e-08
gene-ociad1	1418.59	-3.17439	0.513941	-6.17657	6.55106e-10	1.41773e-08
gene-ldb2a	64.986	-3.17219	0.856615	-3.70317	0.000212926	0.0010363
gene-asap3	37.5508	-3.17145	1.02856	-3.08338	0.00204665	0.00715114
gene-st3gal3b	142.128	-3.16837	0.865041	-3.66269	0.000249584	0.00118745
gene-supv3l1-2	418.928	-3.16759	0.581256	-5.44956	5.04957e-08	6.82505e-07
gene-org	3721.11	-3.16375	0.475291	-6.65645	2.80512e-11	7.76802e-10
gene-cdc34a	640.165	-3.16184	0.59943	-5.27474	1.32944e-07	1.60381e-06
gene-si:dkey-217l24.1	35.1668	-3.15876	1.02318	-3.0872	0.0020205	0.00707504
gene-ptprma	87.5588	-3.1587	0.736666	-4.28784	1.80421e-05	0.000121063
gene-rest	96.6119	-3.15789	0.836959	-3.77305	0.000161264	0.000814674
gene-dph1	439.178	-3.15398	0.590872	-5.33783	9.40632e-08	1.1754e-06
gene-lpcat1	587.434	-3.14793	0.578726	-5.43942	5.34552e-08	7.13575e-07
gene-mylipa	652.058	-3.14564	0.718006	-4.38108	1.18091e-05	8.37756e-05
gene-abcb5	314.876	-3.14522	0.631148	-4.98333	6.24987e-07	6.37925e-06
gene-morn4	36.4309	-3.14312	1.0287	-3.05543	0.00224736	0.00772575
gene-cd9b	594.423	-3.14127	0.686501	-4.57578	4.74455e-06	3.78363e-05
gene-b3gat3	189.632	-3.14012	0.766165	-4.09848	4.15865e-05	0.000251716
gene-lmf2a	101.646	-3.13878	0.820655	-3.82473	0.000130918	0.000680234
gene-LOC100003291	41.9964	-3.12802	0.977396	-3.20036	0.00137254	0.00508398
gene-spg7	64.0191	-3.12651	0.991532	-3.15321	0.00161486	0.00584691
gene-ei24	43.6214	-3.12596	0.922604	-3.3882	0.000703542	0.00287449
gene-cacna1da	38.9891	-3.12384	0.955017	-3.27098	0.00107176	0.00413041
gene-si:dkey-177p2.6	83.1272	-3.12193	0.884344	-3.53022	0.000415209	0.0018328
gene-stk38l	595.939	-3.12148	0.537126	-5.81145	6.19339e-09	1.07719e-07
gene-sinup	983.054	-3.11934	0.716161	-4.35565	1.32675e-05	9.26725e-05
gene-hs3st1	599.815	-3.11828	0.587512	-5.3076	1.11077e-07	1.36543e-06
gene-ppp1r3da	218.723	-3.11723	0.587459	-5.3063	1.1187e-07	1.37443e-06
gene-mllt3	367.679	-3.11706	0.563387	-5.53272	3.15295e-08	4.54891e-07
gene-cyp2aa9	33.2559	-3.11617	1.03199	-3.01957	0.00253131	0.00851403
gene-ptx4-2	76.9865	-3.1153	0.812553	-3.83397	0.000126093	0.000658483
gene-chst2a	542.13	-3.11389	0.51652	-6.0286	1.65383e-09	3.27587e-08
gene-nup35	646.708	-3.11302	0.56958	-5.46546	4.6171e-08	6.33489e-07
gene-rbpms	257.327	-3.11252	0.608285	-5.11687	3.10642e-07	3.40073e-06
gene-st3gal5	651.513	-3.11092	0.83737	-3.7151	0.00020312	0.000993267
gene-tmem51a	190.203	-3.10943	0.787439	-3.94879	7.85487e-05	0.000434614
gene-pigw	234.173	-3.10889	0.587797	-5.28905	1.22953e-07	1.49682e-06
gene-btbd7	103.63	-3.10868	0.761055	-4.0847	4.41339e-05	0.000264943
gene-ippk	195.402	-3.10809	0.676754	-4.59265	4.37652e-06	3.53363e-05
gene-gopc	362.576	-3.10776	0.620771	-5.00628	5.54911e-07	5.74937e-06
gene-si:dkeyp-118h3.6	360.132	-3.10478	0.616215	-5.03848	4.69251e-07	4.9317e-06
gene-si:dkey-194g4.1	81.2456	-3.10337	0.769805	-4.03137	5.54526e-05	0.00032223
gene-si:dkey-260j18.2	335.204	-3.10101	0.559944	-5.53808	3.05808e-08	4.42895e-07
gene-arpp21	280.941	-3.10014	0.714153	-4.341	1.41833e-05	9.81325e-05
gene-tsen2	256.134	-3.09866	0.581786	-5.32611	1.00341e-07	1.24289e-06
gene-vps51	88.4124	-3.09652	0.825244	-3.75225	0.000175257	0.000875512
gene-cited1	126.507	-3.09455	0.710259	-4.35692	1.31903e-05	9.22323e-05
gene-kat2a	321.851	-3.09404	0.709929	-4.35824	1.31112e-05	9.17613e-05
gene-cad	2519.38	-3.09327	0.484382	-6.38601	1.70267e-10	4.05073e-09
gene-ckbb	7824.34	-3.09269	0.664272	-4.65576	3.2278e-06	2.69241e-05
gene-unc119a	93.354	-3.08954	0.782302	-3.94929	7.8382e-05	0.00043401
gene-sp8b	60.1011	-3.08919	1.01565	-3.04158	0.00235336	0.00802862
gene-hspa13	194.822	-3.08751	0.864354	-3.57204	0.000354214	0.0015965
gene-lpcat4	749.493	-3.08523	0.53606	-5.75538	8.64471e-09	1.43952e-07
gene-elf2b	48.4956	-3.08312	0.983648	-3.13437	0.00172224	0.00617459
gene-zgc:113984	66.1708	-3.08083	0.854368	-3.60597	0.000310986	0.00143066
gene-gatsl3	158.853	-3.08039	0.762576	-4.03945	5.35763e-05	0.000312448
gene-nptna	264.647	-3.07927	0.573029	-5.37366	7.71528e-08	9.9028e-07
gene-surf4l	133.017	-3.07876	0.681793	-4.51569	6.3112e-06	4.85049e-05
gene-ska3-2	238.415	-3.07196	1.0165	-3.02209	0.00251033	0.00845725
gene-arl6ip5a	165.767	-3.07099	0.683216	-4.4949	6.96022e-06	5.28129e-05
gene-pcyt1aa	284.238	-3.06896	0.575168	-5.33576	9.51428e-08	1.18563e-06
gene-gdf10a	59.1462	-3.06879	0.822692	-3.73018	0.00019134	0.000944829
gene-ptpn13	349.589	-3.06861	0.562165	-5.45856	4.80016e-08	6.53467e-07
gene-ajuba	498.449	-3.06849	0.564025	-5.44034	5.31788e-08	7.111e-07
gene-hk2	269.362	-3.06825	0.600287	-5.1113	3.19954e-07	3.48873e-06
gene-slc4a2b	104.263	-3.06703	0.849384	-3.61089	0.000305148	0.00141125
gene-ptdss2	98.115	-3.06647	0.71817	-4.26984	1.95611e-05	0.000129928
gene-ppp1r26	571.539	-3.06647	0.610944	-5.01923	5.18802e-07	5.40736e-06
gene-LOC101885114	98.011	-3.06615	0.740081	-4.14299	3.42808e-05	0.000212952
gene-umps	1219.26	-3.06607	0.592722	-5.17285	2.30546e-07	2.61439e-06
gene-nrip1b	73.2933	-3.06429	0.799459	-3.83295	0.000126616	0.000660452
gene-hace1	60.4844	-3.06241	0.886462	-3.45464	0.000551028	0.00233202
gene-her7	120.439	-3.06239	0.761182	-4.02321	5.74107e-05	0.000332247
gene-pald1a	1336.71	-3.06216	0.594644	-5.14956	2.61091e-07	2.92856e-06
gene-fastkd1	149.866	-3.06051	0.793933	-3.85487	0.000115793	0.000611166
gene-zmp:0000000529	56.0348	-3.05846	0.907178	-3.3714	0.000747862	0.00303317
gene-irs4a	114.59	-3.05841	0.689358	-4.4366	9.13898e-06	6.71435e-05
gene-ranbp10-2	120.371	-3.05731	0.795994	-3.84087	0.000122597	0.000641971
gene-jtb	683.731	-3.05702	0.552948	-5.52859	3.22814e-08	4.64556e-07
gene-dna2-2	234.835	-3.05694	0.62535	-4.88837	1.01672e-06	9.83335e-06
gene-hs2st1b	63.4386	-3.05358	0.875224	-3.48891	0.000484999	0.0020924
gene-atg10	325.143	-3.05348	0.627357	-4.86722	1.13181e-06	1.07855e-05
gene-zgc:171727	421.864	-3.05267	0.620085	-4.923	8.52296e-07	8.41169e-06
gene-ndst2b	103.772	-3.05105	0.743452	-4.1039	4.0624e-05	0.000246747
gene-tmem87b	92.4577	-3.04887	0.879075	-3.46827	0.000523819	0.00223396
gene-galcb	825.011	-3.04733	0.554496	-5.49567	3.89223e-08	5.49662e-07
gene-tcerg1b	279.376	-3.0434	0.689154	-4.41614	1.00479e-05	7.28072e-05
gene-tln2b	114.641	-3.04187	0.715218	-4.25307	2.10859e-05	0.000138979
gene-LOC110437968	137.517	-3.04155	0.973646	-3.12387	0.00178488	0.00635896
gene-plscr3b	395.521	-3.03957	0.565774	-5.37241	7.76897e-08	9.96608e-07
gene-yif1b	247.566	-3.03941	0.850814	-3.57235	0.000353791	0.00159491
gene-ftr84	36.9552	-3.0382	0.971042	-3.12881	0.00175517	0.00627379
gene-fmr1	474.148	-3.03489	0.525514	-5.77509	7.69103e-09	1.30661e-07
gene-stx5a	116.564	-3.03319	0.865319	-3.50529	0.000456113	0.0019905
gene-csgalnact2	186.26	-3.03145	0.681993	-4.44498	8.7898e-06	6.48723e-05
gene-spint1b	235.135	-3.02995	0.672704	-4.50414	6.6642e-06	5.08731e-05
gene-cog1	664.743	-3.02911	0.533482	-5.67801	1.36274e-08	2.16892e-07
gene-zgc:114200	388.559	-3.02756	0.535513	-5.65357	1.57149e-08	2.46654e-07
gene-lnpa	869.746	-3.02256	0.549174	-5.50384	3.71605e-08	5.2708e-07
gene-frmpd4	312.904	-3.02183	0.793447	-3.80849	0.000139821	0.000720549
gene-si:ch211-261a10.5	184.704	-3.01996	0.686169	-4.40119	1.07658e-05	7.72437e-05
gene-qtrt1	790.195	-3.01555	0.527291	-5.71895	1.07185e-08	1.75014e-07
gene-zmpste24-2	132.747	-3.01304	1.01221	-2.97669	0.0029138	0.00956654
gene-ammecr1	429.843	-3.01288	0.609936	-4.93967	7.82563e-07	7.78103e-06
gene-aprt	521.926	-3.01251	0.590419	-5.10233	3.35504e-07	3.63904e-06
gene-hmg20b	304.24	-3.01204	0.633717	-4.75298	2.00442e-06	1.77926e-05
gene-phc3	125.581	-3.01074	0.767861	-3.92095	8.8202e-05	0.000482261
gene-adarb1b	102.176	-3.01033	0.72059	-4.17759	2.94618e-05	0.00018696
gene-uqcrq-2	70.6045	-3.00718	0.839252	-3.58317	0.000339446	0.00153942
gene-smad4a	228.721	-3.00198	0.776656	-3.86526	0.000110969	0.000587757
gene-pdp2	99.232	-3.00121	0.847342	-3.54191	0.000397241	0.0017631
gene-mdh1ab	311.036	-3.00095	0.550273	-5.45356	4.93718e-08	6.70109e-07
gene-pdxka	164.803	-2.99847	0.623525	-4.8089	1.51763e-06	1.39408e-05
gene-mfsd2aa	620.476	-2.99554	0.582595	-5.14172	2.72241e-07	3.03255e-06
gene-polr3c	640.369	-2.99352	0.547297	-5.46964	4.50938e-08	6.23234e-07
gene-si:dkey-153k10.6-2	61.0406	-2.9934	0.831896	-3.59829	0.000320313	0.00146791
gene-pik3ap1-2	139.051	-2.99299	0.737845	-4.05639	4.9838e-05	0.000293973
gene-mettl13	279.668	-2.99226	0.575743	-5.19723	2.02283e-07	2.33356e-06
gene-igf2bp3	796.71	-2.99191	0.706064	-4.23745	2.26077e-05	0.000147764
gene-glipr2l	707.138	-2.9847	0.609181	-4.89953	9.60646e-07	9.35485e-06
gene-mvk	404.702	-2.98458	0.604153	-4.94011	7.80792e-07	7.76682e-06
gene-rasa2	44.5446	-2.98441	0.898133	-3.32291	0.00089084	0.00352297
gene-actr5	627.395	-2.98307	0.515891	-5.78237	7.36538e-09	1.25694e-07
gene-csf3b	85.2873	-2.98207	0.905459	-3.29344	0.000989696	0.00385861
gene-ppp2r2aa	96.6608	-2.97896	0.790581	-3.76806	0.00016452	0.000828629
gene-smad2	1472.41	-2.97759	0.483132	-6.16311	7.13285e-10	1.52616e-08
gene-man2a2	64.9629	-2.97757	0.787709	-3.78004	0.000156805	0.000795782
gene-gemin5	818.738	-2.97744	0.499946	-5.95553	2.59236e-09	4.90364e-08
gene-smyd3	177.088	-2.97506	0.858471	-3.46553	0.00052918	0.00225301
gene-LOC110440055	61.5865	-2.97311	0.845571	-3.51609	0.000437946	0.00192195
gene-xpo7	96.6297	-2.96792	0.730259	-4.0642	4.81978e-05	0.000286084
gene-alkbh8	551.062	-2.9673	0.602928	-4.92148	8.58907e-07	8.46589e-06
gene-gemin8	282.966	-2.96521	0.596556	-4.97055	6.67638e-07	6.76587e-06
gene-si:ch211-239e6.4	868.731	-2.96473	0.718689	-4.1252	3.70419e-05	0.000227857
gene-her2	117.099	-2.96466	0.682726	-4.34238	1.40945e-05	9.76369e-05
gene-grin3ba	93.456	-2.9618	0.706431	-4.19263	2.75738e-05	0.00017646
gene-picalma	49.702	-2.96177	0.991178	-2.98813	0.00280693	0.0092814
gene-cry2	211.161	-2.96031	0.756773	-3.91176	9.16268e-05	0.000498344
gene-plpp5	484.306	-2.95881	0.534188	-5.53889	3.04398e-08	4.41567e-07
gene-fam129ba	446.89	-2.95832	0.555548	-5.32505	1.00923e-07	1.24874e-06
gene-zgc:101016	577.673	-2.95614	0.541317	-5.461	4.73458e-08	6.46479e-07
gene-dock1	263.688	-2.95599	0.630687	-4.68693	2.77329e-06	2.36105e-05
gene-sncaip	64.3993	-2.95569	0.911602	-3.2423	0.00118568	0.00448934
gene-klhl35	96.1611	-2.95426	0.738768	-3.9989	6.3638e-05	0.000363005
gene-ptdss1a	553.755	-2.95363	0.551719	-5.3535	8.62708e-08	1.08883e-06
gene-eif4g2a	2107.68	-2.95172	0.493597	-5.98003	2.23102e-09	4.30267e-08
gene-myo9b	245.881	-2.95151	0.577257	-5.11299	3.17104e-07	3.46098e-06
gene-brpf1	178.259	-2.95068	0.655882	-4.49879	6.8341e-06	5.19476e-05
gene-si:dkeyp-2e4.7	134.926	-2.94778	0.652748	-4.51595	6.30334e-06	4.84609e-05
gene-sardh-2	133.089	-2.94277	0.655143	-4.49179	7.0627e-06	5.34832e-05
gene-ccdc58	494.979	-2.94141	0.533711	-5.51125	3.56302e-08	5.09196e-07
gene-slc35a1	176.6	-2.94018	0.712709	-4.12536	3.70157e-05	0.000227758
gene-rufy1	811.259	-2.93578	0.523667	-5.6062	2.06815e-08	3.1396e-07
gene-prmt6	769.052	-2.93498	0.507057	-5.78827	7.11168e-09	1.2173e-07
gene-setd8b-2	249.835	-2.93409	0.844096	-3.47602	0.000508915	0.00217942
gene-rogdi	674.846	-2.93364	0.53678	-5.46526	4.62223e-08	6.3381e-07
gene-cited2	150.179	-2.9326	0.831873	-3.5253	0.000423003	0.0018643
gene-mtmr7a-2	143.671	-2.93174	0.881975	-3.32406	0.00088716	0.00351148
gene-wu:fe02h09	212.779	-2.92767	0.709845	-4.12437	3.71748e-05	0.000228427
gene-aldh3b1	445.053	-2.92445	0.537321	-5.44264	5.24954e-08	7.03662e-07
gene-rrp9-2	330.35	-2.92369	0.639144	-4.57439	4.77604e-06	3.80472e-05
gene-thop1	3903.3	-2.92291	0.540784	-5.40494	6.48288e-08	8.45983e-07
gene-cita	455.681	-2.92113	0.795807	-3.67066	0.00024193	0.0011571
gene-nudt19	68.2477	-2.92086	0.778506	-3.75187	0.000175518	0.00087643
gene-rgs20	51.0266	-2.91916	0.904855	-3.2261	0.00125489	0.00470117
gene-gsnb	248.221	-2.91893	0.596543	-4.89308	9.92722e-07	9.63412e-06
gene-herpud1	1334.08	-2.91581	0.505648	-5.76648	8.09437e-09	1.35985e-07
gene-tln2a	174.352	-2.91548	0.611142	-4.77054	1.83729e-06	1.64572e-05
gene-si:ch73-299h12.4	170.635	-2.91536	0.865771	-3.36736	0.000758911	0.00307194
gene-hlcs	153.194	-2.91341	0.674764	-4.31767	1.57684e-05	0.000107492
gene-pmaip1	191.147	-2.9111	0.797404	-3.65072	0.000261508	0.00123717
gene-pold3	628.826	-2.91094	0.621431	-4.68426	2.8097e-06	2.38845e-05
gene-orc6	732.983	-2.90985	0.614152	-4.738	2.15834e-06	1.89785e-05
gene-ehmt1a	534.836	-2.90945	0.631872	-4.60449	4.13484e-06	3.35281e-05
gene-ftsj2	163.819	-2.90909	0.852701	-3.41162	0.000645773	0.00266876
gene-wdr4	820.947	-2.90842	0.50013	-5.81532	6.05164e-09	1.05578e-07
gene-si:ch211-59o9.10	1321.56	-2.90595	0.615792	-4.71905	2.36945e-06	2.05976e-05
gene-dhrs13b-2	158.848	-2.90452	0.69376	-4.18664	2.83115e-05	0.000180417
gene-prr11	1199.97	-2.90295	0.766417	-3.78769	0.000152057	0.000774458
gene-zgc:152863	301.382	-2.90259	0.693012	-4.18837	2.80967e-05	0.000179301
gene-nol10	706.405	-2.9003	0.522862	-5.54697	2.90662e-08	4.24483e-07
gene-erbb4b	106.771	-2.89932	0.805318	-3.60021	0.00031796	0.0014589
gene-dvl2	138.152	-2.89862	0.67831	-4.2733	1.92599e-05	0.000128098
gene-LOC100538279	86.6735	-2.89843	0.783095	-3.70125	0.000214542	0.00104282
gene-micall2b	390.984	-2.89702	0.594915	-4.86964	1.118e-06	1.06628e-05
gene-disc1	62.9817	-2.89434	0.861373	-3.36014	0.000779025	0.00313991
gene-nudcd1	556.477	-2.89291	0.539324	-5.36395	8.14217e-08	1.03193e-06
gene-LOC108184060	131.413	-2.89197	0.656581	-4.40458	1.05987e-05	7.61656e-05
gene-psmd2	222.907	-2.88873	0.639942	-4.51404	6.36037e-06	4.88332e-05
gene-spsb1-2	480.614	-2.88867	0.693124	-4.16761	3.07812e-05	0.000194299
gene-zgc:163143	537.065	-2.88761	0.556255	-5.19116	2.08985e-07	2.39746e-06
gene-ano3	103.252	-2.88706	0.684154	-4.21991	2.44405e-05	0.000158329
gene-tmem38b	113.129	-2.88674	0.675336	-4.27452	1.91548e-05	0.000127474
gene-wasla-2	94.6821	-2.88648	0.721926	-3.9983	6.37985e-05	0.000363738
gene-nbr1b-2	96.005	-2.88502	0.745424	-3.87031	0.000108697	0.000577476
gene-gtf2a1l	263.013	-2.88361	0.577143	-4.99635	5.8425e-07	6.02582e-06
gene-anapc5	460.608	-2.87859	0.562506	-5.11745	3.09702e-07	3.39654e-06
gene-si:ch211-253b8.2	309.321	-2.87826	0.653819	-4.40223	1.07142e-05	7.6898e-05
gene-gab1	102.531	-2.87526	0.699065	-4.11301	3.90539e-05	0.000238295
gene-thap1	153.359	-2.87474	0.643598	-4.46666	7.94488e-06	5.92925e-05
gene-maml3	149.889	-2.87149	0.765757	-3.74987	0.000176926	0.000882101
gene-pdia5	288.055	-2.87123	0.576509	-4.98037	6.34624e-07	6.46307e-06
gene-rbm24a	56.5742	-2.86906	0.81743	-3.50985	0.000448359	0.00196233
gene-pofut1	342.725	-2.86905	0.636785	-4.50553	6.62061e-06	5.05915e-05
gene-zgc:113293	217.225	-2.86677	0.808063	-3.5477	0.000388608	0.00172884
gene-rrm1	3851.13	-2.86666	0.49693	-5.76874	7.98673e-09	1.34876e-07
gene-zhx3	445.597	-2.86642	0.527738	-5.43151	5.58793e-08	7.41407e-07
gene-cxcr4a	56.3619	-2.86641	0.86456	-3.31546	0.000914937	0.0036057
gene-alg8	116.237	-2.8641	0.789343	-3.62846	0.000285114	0.00133026
gene-rpp21-2	225.703	-2.86273	0.653592	-4.38	1.1868e-05	8.40884e-05
gene-dhx30	333.663	-2.86228	0.606564	-4.71885	2.37185e-06	2.06106e-05
gene-mkrn2	449.181	-2.86071	0.523916	-5.46024	4.75481e-08	6.48071e-07
gene-fbxo5	2050.43	-2.85943	0.494691	-5.78025	7.45919e-09	1.27008e-07
gene-gpr137c	432.043	-2.85919	0.551599	-5.18346	2.17802e-07	2.49231e-06
gene-nmnat1	153.954	-2.85697	0.743552	-3.84232	0.000121876	0.000638668
gene-ykt6	519.124	-2.85657	0.551462	-5.18001	2.21879e-07	2.53218e-06
gene-ids	517.13	-2.85516	0.669688	-4.26341	2.01327e-05	0.000133356
gene-march7	1603.35	-2.85461	0.506258	-5.63864	1.71403e-08	2.66079e-07
gene-lman1	858.657	-2.85309	0.546126	-5.22424	1.74875e-07	2.04652e-06
gene-igf1rb-2	100.829	-2.85272	0.878928	-3.24568	0.00117171	0.00444761
gene-znf1181	140.398	-2.85193	0.662213	-4.30666	1.65739e-05	0.000112477
gene-LOC100538044	40.9827	-2.84935	0.922057	-3.09021	0.00200014	0.00701241
gene-senp3b	828.467	-2.844	0.511173	-5.56367	2.64164e-08	3.90055e-07
gene-pde11al	73.261	-2.84288	0.788664	-3.60468	0.000312534	0.00143691
gene-cipcb	43.1754	-2.84062	0.927916	-3.06128	0.00220389	0.00760448
gene-chtf8-2	183.15	-2.83902	0.907992	-3.1267	0.00176781	0.00631026
gene-ctu2	474.709	-2.83876	0.592942	-4.78759	1.68798e-06	1.53073e-05
gene-usp45	59.6312	-2.83696	0.824678	-3.44008	0.000581541	0.00243841
gene-mettl2a	442.006	-2.83695	0.662689	-4.28097	1.86078e-05	0.000124162
gene-capn5a	64.1791	-2.82986	0.935206	-3.02592	0.00247877	0.0083671
gene-dock5	41.8324	-2.82953	0.937349	-3.01866	0.00253899	0.00853353
gene-mhc1laa	179.532	-2.8295	0.674889	-4.19254	2.75852e-05	0.000176483
gene-si:rp71-15i12.1	413.649	-2.82914	0.803211	-3.52229	0.000427834	0.00188413
gene-si:dkey-253d23.2	257.616	-2.82796	0.814095	-3.47374	0.000513253	0.0021936
gene-podxl2	590.775	-2.82689	0.529877	-5.33498	9.55539e-08	1.19009e-06
gene-fam212ab	2572.29	-2.82338	0.572271	-4.93365	8.07062e-07	8.00357e-06
gene-si:dkey-85k15.4	735.85	-2.8188	0.592542	-4.75713	1.96368e-06	1.7472e-05
gene-rmnd5b	575.41	-2.81818	0.845862	-3.33172	0.000863108	0.00343246
gene-add1	635.604	-2.817	0.63428	-4.44126	8.94339e-06	6.58987e-05
gene-homeza-2	202.755	-2.81673	0.660246	-4.26618	1.98848e-05	0.000131906
gene-kif16ba	68.1543	-2.81573	0.772418	-3.64534	0.000267038	0.00126018
gene-cacna1i	57.4845	-2.815	0.836511	-3.36517	0.000764965	0.00309196
gene-fkbp14	213.507	-2.81442	0.6978	-4.03328	5.50031e-05	0.000320028
gene-vps9d1	1124.63	-2.81145	0.514341	-5.46611	4.60008e-08	6.31536e-07
gene-zfand2a	718.755	-2.81075	0.60139	-4.67375	2.95751e-06	2.50098e-05
gene-f3b	415.31	-2.81054	0.582558	-4.82448	1.40371e-06	1.30156e-05
gene-fam126b	39.7063	-2.80626	0.924202	-3.03641	0.00239411	0.00814068
gene-fam173b	322.717	-2.80239	0.552426	-5.07287	3.91852e-07	4.19603e-06
gene-zgc:153675	909.889	-2.80084	0.605359	-4.62674	3.71459e-06	3.0447e-05
gene-LOC100330838	184.095	-2.80024	0.824919	-3.39456	0.000687384	0.00281813
gene-kcnk6	309.792	-2.79986	0.671644	-4.16867	3.06384e-05	0.00019356
gene-ino80b	213.008	-2.79983	0.709695	-3.94512	7.97614e-05	0.000440787
gene-sec61a1l	1729.29	-2.79962	0.573084	-4.88518	1.03333e-06	9.96846e-06
gene-abhd18	276.696	-2.79962	0.577159	-4.85069	1.23036e-06	1.16269e-05
gene-LOC110437808	89.864	-2.79795	0.714297	-3.91707	8.963e-05	0.000488656
gene-impad1	308.117	-2.7974	0.673211	-4.15531	3.24847e-05	0.000203579
gene-prrg2	793.429	-2.79657	0.499333	-5.60061	2.13602e-08	3.23181e-07
gene-nbas	139.042	-2.79642	0.917079	-3.04927	0.00229399	0.00785205
gene-zgc:100846	82.816	-2.79562	0.931375	-3.0016	0.00268563	0.00892847
gene-plp1a	127.786	-2.79302	0.64682	-4.31808	1.57391e-05	0.000107325
gene-zdhhc3a	167.453	-2.79183	0.683722	-4.08329	4.44034e-05	0.00026628
gene-zc3h18	162.607	-2.79007	0.75698	-3.68579	0.000227993	0.00109925
gene-mtf2	420.447	-2.7882	0.774655	-3.59927	0.000319106	0.00146327
gene-bace2	485.986	-2.78719	0.536594	-5.19422	2.05578e-07	2.36436e-06
gene-ntmt1	504.598	-2.78651	0.55784	-4.99517	5.87831e-07	6.0545e-06
gene-cbx2	237.127	-2.7858	0.591196	-4.71215	2.45122e-06	2.11624e-05
gene-abt1	466.526	-2.78413	0.574934	-4.84252	1.28204e-06	1.206e-05
gene-LOC100534785	69.3996	-2.78307	0.761238	-3.65598	0.000256199	0.00121484
gene-dap1b	1262.26	-2.78243	0.674723	-4.12382	3.72642e-05	0.000228853
gene-zmym4	1275.72	-2.78116	0.490205	-5.67346	1.39944e-08	2.22264e-07
gene-chp2	207.067	-2.78107	0.5984	-4.6475	3.3598e-06	2.78953e-05
gene-accs	532.549	-2.77485	0.573569	-4.83787	1.31237e-06	1.22791e-05
gene-lrrc47	847.383	-2.77469	0.577864	-4.80164	1.57371e-06	1.44151e-05
gene-LOC571446	50.9001	-2.77462	0.847011	-3.27577	0.00105374	0.00406925
gene-rab3da	76.164	-2.77392	0.831642	-3.33547	0.000851549	0.00339441
gene-gdap2	438.694	-2.76902	0.582223	-4.75594	1.97525e-06	1.75475e-05
gene-tomm70a	98.7537	-2.76849	0.782067	-3.53996	0.000400181	0.00177372
gene-cdc16-2	259.435	-2.76825	0.593055	-4.66778	3.04472e-06	2.56517e-05
gene-fam210aa	171.686	-2.76671	0.616186	-4.49006	7.12015e-06	5.38104e-05
gene-arl8bb	130.545	-2.76612	0.65101	-4.24896	2.14762e-05	0.000141223
gene-si:ch73-47f2.1	49.2562	-2.76447	0.868665	-3.18244	0.0014604	0.00536995
gene-si:ch73-106l15.3	389.435	-2.76299	0.697843	-3.95933	7.51606e-05	0.000418626
gene-wee2-2	1148.26	-2.7613	0.516682	-5.34429	9.07744e-08	1.13744e-06
gene-cnp	2559.91	-2.75997	0.479955	-5.75048	8.89879e-09	1.47857e-07
gene-LOC100331556	127.299	-2.75629	0.719596	-3.83033	0.000127974	0.000666309
gene-tmem266	400.002	-2.7551	0.575614	-4.78637	1.69824e-06	1.53789e-05
gene-zc3hc1	769.483	-2.75382	0.522856	-5.26689	1.38757e-07	1.66685e-06
gene-si:ch1073-357b18.4	140.618	-2.75264	0.731346	-3.76381	0.000167347	0.000840253
gene-fbxo22	217.49	-2.75159	0.76608	-3.59177	0.000328435	0.00149968
gene-ctsla	5171.34	-2.74943	0.48097	-5.71643	1.08787e-08	1.77503e-07
gene-pard3aa	47.5367	-2.7494	0.861648	-3.19086	0.00141848	0.00523194
gene-znf326	610.677	-2.74836	0.516391	-5.32224	1.02497e-07	1.26751e-06
gene-zgc:171566	357.369	-2.7481	0.833286	-3.2979	0.000974097	0.0038084
gene-fam76b	898.354	-2.74795	0.497651	-5.52184	3.35459e-08	4.80923e-07
gene-gabpb2a	390.743	-2.7456	0.605424	-4.535	5.76039e-06	4.4711e-05
gene-elp2	378.685	-2.74093	0.715197	-3.83242	0.000126891	0.000661736
gene-klhl29	136.179	-2.74032	0.642117	-4.26763	1.97561e-05	0.000131129
gene-cdk5	125.308	-2.73847	0.657447	-4.16531	3.10933e-05	0.000195823
gene-tyw3	331.288	-2.738	0.596838	-4.58752	4.48549e-06	3.61004e-05
gene-exoc3	137.585	-2.73789	0.766825	-3.57042	0.000356408	0.00160543
gene-LOC100333625	164.365	-2.73694	0.731066	-3.74376	0.000181284	0.000901849
gene-LOC110438186	98.0007	-2.73605	0.704103	-3.88587	0.000101965	0.000546796
gene-arhgap1	138.015	-2.736	0.76868	-3.55935	0.000371771	0.00166504
gene-dtl	558.794	-2.7349	0.693533	-3.94344	8.03226e-05	0.000443348
gene-atad1a	344.525	-2.73333	0.71221	-3.83782	0.000124133	0.000649438
gene-slx1b	399.559	-2.73321	0.56063	-4.87524	1.08675e-06	1.04173e-05
gene-c23h20orf24	987.463	-2.73299	0.496382	-5.50583	3.67437e-08	5.23084e-07
gene-exd2	821.177	-2.73284	0.589668	-4.63454	3.57732e-06	2.93856e-05
gene-rbm38	418.943	-2.73248	0.631798	-4.32493	1.52579e-05	0.000104389
gene-galnt18a	92.3298	-2.73109	0.793977	-3.43976	0.000582229	0.00244039
gene-xkrx	294.603	-2.7295	0.574908	-4.74771	2.05733e-06	1.82195e-05
gene-LOC100534722	60.737	-2.72904	0.844197	-3.2327	0.00122626	0.00461374
gene-hrasb	314.074	-2.72892	0.559856	-4.87432	1.09184e-06	1.04617e-05
gene-lrpprc	191.768	-2.72678	0.696017	-3.91769	8.94012e-05	0.00048758
gene-irf5	612.542	-2.72666	0.510003	-5.34636	8.97405e-08	1.1276e-06
gene-bzw1b	6461.03	-2.7258	0.627101	-4.34666	1.38224e-05	9.6075e-05
gene-commd9	152.351	-2.72521	0.807278	-3.37581	0.000735999	0.00299041
gene-abhd17aa	333.69	-2.72508	0.549353	-4.96052	7.03045e-07	7.08355e-06
gene-LOC100330644	158.449	-2.72367	0.633596	-4.29874	1.71771e-05	0.000115876
gene-tmem53	320.78	-2.7228	0.542168	-5.02206	5.1119e-07	5.33538e-06
gene-opa3	126.291	-2.72262	0.71737	-3.79527	0.000147481	0.000754027
gene-ngef	194.129	-2.72182	0.759489	-3.58375	0.0003387	0.00153716
gene-palld	1379.56	-2.72168	0.589713	-4.61526	3.926e-06	3.20178e-05
gene-arl4d-2	139.195	-2.72113	0.725297	-3.75174	0.000175613	0.00087671
gene-gpt2	224.33	-2.71975	0.799636	-3.40124	0.000670821	0.0027607
gene-tpm3	924.02	-2.71941	0.64949	-4.18699	2.82678e-05	0.00018024
gene-fbxo30b	631.089	-2.719	0.691475	-3.93217	8.41819e-05	0.000462104
gene-dus1l	701.728	-2.71779	0.518434	-5.24231	1.5858e-07	1.87714e-06
gene-sel1l	940.404	-2.71764	0.564033	-4.81822	1.44842e-06	1.33919e-05
gene-esr2a	75.9959	-2.71709	0.80093	-3.39242	0.000692792	0.00283619
gene-polr1b-2	97.2226	-2.71701	0.863093	-3.148	0.00164394	0.00593798
gene-timm10b	344.747	-2.71689	0.547193	-4.96514	6.86519e-07	6.93861e-06
gene-lztr1	364	-2.71523	0.691409	-3.9271	8.59751e-05	0.00047088
gene-bmp1b	193.937	-2.7139	0.627342	-4.32604	1.51817e-05	0.000103962
gene-pus1	823.993	-2.71302	0.498807	-5.43903	5.35728e-08	7.14194e-07
gene-pnkd	74.0788	-2.71302	0.745681	-3.6383	0.000274439	0.00128894
gene-rbm19-2	68.8035	-2.71074	0.91515	-2.96207	0.0030558	0.00995626
gene-LOC110437765	125.173	-2.70985	0.657529	-4.12126	3.76805e-05	0.000230889
gene-LOC100535588	162.106	-2.70925	0.662107	-4.09186	4.27936e-05	0.000258196
gene-metrnl	542.105	-2.70867	0.588891	-4.59962	4.2326e-06	3.42841e-05
gene-gcat	624.256	-2.70797	0.521199	-5.19566	2.03997e-07	2.34855e-06
gene-epm2a	52.4748	-2.707	0.835563	-3.23973	0.00119642	0.00451872
gene-diexf	889.381	-2.70645	0.523843	-5.16653	2.38474e-07	2.69755e-06
gene-zgc:162948	418.198	-2.70405	0.542286	-4.98638	6.15204e-07	6.29356e-06
gene-asb3	786.275	-2.7025	0.694133	-3.89334	9.88737e-05	0.000532523
gene-aak1b	89.7043	-2.70128	0.709175	-3.80904	0.000139506	0.000719255
gene-kdm7ab-2	114.96	-2.70062	0.66812	-4.04212	5.29696e-05	0.000309467
gene-lamtor1	346.138	-2.70055	0.563592	-4.79168	1.65394e-06	1.50588e-05
gene-trim16	340.993	-2.69952	0.7896	-3.41884	0.00062889	0.00260706
gene-tmem110l	237.892	-2.6994	0.768401	-3.51301	0.000443062	0.00194233
gene-ap5m1	346.747	-2.69916	0.590328	-4.57231	4.82377e-06	3.83601e-05
gene-si:ch1073-143l10.2	240.505	-2.69898	0.620671	-4.34848	1.37084e-05	9.53993e-05
gene-rab35b	1371.01	-2.69702	0.599173	-4.50124	6.75579e-06	5.14856e-05
gene-mad2l1bp	275.442	-2.6965	0.859003	-3.1391	0.00169467	0.00609789
gene-entpd4	665.643	-2.69635	0.717249	-3.7593	0.00017039	0.000854021
gene-tonsl	124.565	-2.69582	0.651095	-4.14044	3.46637e-05	0.000214978
gene-zgc:113019	922.616	-2.69534	0.502276	-5.36625	8.03883e-08	1.0237e-06
gene-ptp4a3	797.646	-2.69423	0.63246	-4.25992	2.04499e-05	0.00013518
gene-tmem203	486.055	-2.69401	0.593794	-4.53694	5.70766e-06	4.43473e-05
gene-c24h7orf50	695.484	-2.69379	0.563373	-4.78155	1.73953e-06	1.56869e-05
gene-cdc42ep4b	135.331	-2.69231	0.842293	-3.19641	0.00139151	0.00514584
gene-llgl1	403.315	-2.69159	0.536408	-5.0178	5.22668e-07	5.44266e-06
gene-dnmt3bb.2	233.035	-2.69094	0.74754	-3.59973	0.000318547	0.0014613
gene-si:dkey-114g7.4	934.272	-2.68939	0.538781	-4.99162	5.98738e-07	6.14174e-06
gene-trpv4	104.721	-2.68908	0.699089	-3.84655	0.000119791	0.000629516
gene-ildr1a	513.316	-2.68698	0.83185	-3.23012	0.00123737	0.00464781
gene-arhgap28	78.4561	-2.68649	0.799862	-3.35869	0.000783127	0.0031542
gene-igdcc3	190.943	-2.68647	0.59426	-4.52069	6.16377e-06	4.74683e-05
gene-eepd1	469.907	-2.68605	0.66366	-4.04733	5.18051e-05	0.000303681
gene-kcnk5b	406.456	-2.68434	0.573544	-4.68027	2.86492e-06	2.43175e-05
gene-ubxn2a	470.111	-2.68432	0.589951	-4.55008	5.36264e-06	4.20265e-05
gene-pik3cd	154.428	-2.68311	0.748179	-3.58619	0.000335542	0.00152568
gene-zgc:152977	779.659	-2.68254	0.675296	-3.97238	7.11571e-05	0.000398775
gene-mettl1	316.862	-2.6818	0.548298	-4.89113	1.00259e-06	9.7091e-06
gene-mertka	113.007	-2.68149	0.809844	-3.31112	0.000929237	0.0036557
gene-mbtps1-2	276.247	-2.68063	0.703312	-3.81144	0.00013816	0.000713143
gene-hmha1b	806.4	-2.68033	0.709618	-3.77715	0.000158635	0.00080327
gene-slc12a8	383.808	-2.67995	0.674247	-3.97472	7.04608e-05	0.000395376
gene-arid3b	662.994	-2.67926	0.534505	-5.01259	5.37017e-07	5.58695e-06
gene-fn3krp	62.7557	-2.67908	0.815414	-3.28554	0.00101786	0.00395496
gene-ddx52	1024.69	-2.67701	0.525657	-5.0927	3.52993e-07	3.80869e-06
gene-hbegfa	864.355	-2.67677	0.5503	-4.86421	1.14912e-06	1.09321e-05
gene-zgc:158376	150.943	-2.67623	0.795031	-3.36619	0.000762139	0.00308336
gene-gsto2	789.016	-2.67569	0.759715	-3.52196	0.000428366	0.0018857
gene-trim32	188.615	-2.67318	0.59516	-4.49153	7.07121e-06	5.35118e-05
gene-ficd	426.955	-2.6712	0.851525	-3.13696	0.00170708	0.00613439
gene-chd8	168.114	-2.66982	0.614595	-4.34403	1.39895e-05	9.70278e-05
gene-pgap2	337.82	-2.669	0.632023	-4.22295	2.41122e-05	0.000156336
gene-txlng	151.906	-2.66828	0.680956	-3.91843	8.91271e-05	0.000486616
gene-ect2	1003.67	-2.66645	0.694489	-3.83944	0.000123314	0.000645456
gene-fnbp1l	1038.53	-2.66622	0.748744	-3.56092	0.000369556	0.00165676
gene-gramd4b	106.161	-2.66609	0.883828	-3.01653	0.00255687	0.00857585
gene-acrc	862.881	-2.66496	0.533571	-4.99457	5.89664e-07	6.06787e-06
gene-scnm1	546.374	-2.6645	0.530811	-5.01968	5.17579e-07	5.3971e-06
gene-nansa	623.926	-2.66127	0.578192	-4.60274	4.16962e-06	3.3798e-05
gene-arl9	96.7413	-2.65985	0.724213	-3.67274	0.000239965	0.00114916
gene-bop1	1199.61	-2.65889	0.485707	-5.47427	4.39319e-08	6.10524e-07
gene-rwdd2b	576.57	-2.65855	0.529256	-5.02319	5.08207e-07	5.3067e-06
gene-erap1b	1197.05	-2.65233	0.579927	-4.57355	4.7952e-06	3.81865e-05
gene-si:rp71-46j2.7	124.063	-2.64878	0.672744	-3.93728	8.24109e-05	0.000453692
gene-LOC100538118	117.829	-2.64817	0.818094	-3.237	0.00120792	0.00455681
gene-tlr18	184.828	-2.64609	0.655534	-4.03654	5.42457e-05	0.000316027
gene-si:ch73-389k6.1	192.847	-2.6458	0.783036	-3.37889	0.000727786	0.00296128
gene-lipia	260.278	-2.64555	0.646302	-4.09337	4.25148e-05	0.000256836
gene-golph3	107.18	-2.64467	0.812212	-3.25613	0.00112944	0.0043124
gene-mgat5	1006.52	-2.64443	0.630171	-4.19638	2.71219e-05	0.000173764
gene-rps6ka3a	44.4856	-2.64309	0.87488	-3.02109	0.00251868	0.00847782
gene-gne	264.414	-2.6404	0.566313	-4.66243	3.12493e-06	2.61719e-05
gene-si:ch211-202f5.3	420.473	-2.6402	0.67363	-3.91936	8.87846e-05	0.000484979
gene-pomgnt2	127.275	-2.63692	0.641799	-4.10863	3.98014e-05	0.0002424
gene-suv420h1-2	338.45	-2.63646	0.80247	-3.28543	0.00101826	0.00395583
gene-rab1bb	263.711	-2.63607	0.630894	-4.17831	2.93683e-05	0.000186471
gene-pdss2	421.753	-2.63358	0.526446	-5.00257	5.65713e-07	5.84794e-06
gene-rasa1a	366.539	-2.63341	0.536151	-4.91169	9.0293e-07	8.86897e-06
gene-tram2	966.698	-2.63298	0.603905	-4.35992	1.30112e-05	9.11913e-05
gene-gpd1l	172.117	-2.63289	0.739976	-3.55808	0.000373575	0.00167246
gene-urod	212.737	-2.6289	0.605644	-4.34067	1.4205e-05	9.82279e-05
gene-cfl1l	856.474	-2.62814	0.555842	-4.72821	2.26507e-06	1.98041e-05
gene-si:ch211-199o1.2	82.4589	-2.62788	0.753398	-3.48804	0.000486576	0.00209801
gene-chek2	58.4355	-2.62769	0.828488	-3.17166	0.00151569	0.00554118
gene-imp3	522.397	-2.62609	0.546944	-4.80138	1.57573e-06	1.44277e-05
gene-crls1	334.629	-2.6245	0.553497	-4.74166	2.11969e-06	1.86988e-05
gene-tmem57a	696.001	-2.62267	0.826912	-3.17165	0.00151576	0.00554118
gene-ttll4	1977.61	-2.6216	0.511982	-5.1205	3.04725e-07	3.35331e-06
gene-zgc:173480	210.521	-2.6208	0.594823	-4.40603	1.05285e-05	7.5805e-05
gene-mgat1a	824.725	-2.61907	0.498376	-5.25521	1.47853e-07	1.76769e-06
gene-napgb	47.4857	-2.61821	0.861861	-3.03786	0.00238268	0.00811157
gene-fam113	539.924	-2.6158	0.687873	-3.80273	0.000143107	0.000734648
gene-LOC100334104	272.603	-2.61513	0.617072	-4.23797	2.25549e-05	0.000147505
gene-kdm3b	231.207	-2.61437	0.654602	-3.99383	6.50131e-05	0.000369779
gene-hspa5	12875.1	-2.61326	0.516083	-5.06364	4.11326e-07	4.37975e-06
gene-cdc14ab	63.3236	-2.61197	0.860637	-3.03492	0.00240597	0.00816975
gene-cog5	134.904	-2.60948	0.652301	-4.00043	6.32275e-05	0.000361118
gene-ttc27-3	267.86	-2.60915	0.585066	-4.45958	8.21193e-06	6.10244e-05
gene-clcn2b	120.393	-2.60866	0.80245	-3.25088	0.0011505	0.00437956
gene-smim12	640.177	-2.60852	0.50826	-5.13226	2.86287e-07	3.17195e-06
gene-scd	356.193	-2.60809	0.835606	-3.12119	0.0018012	0.00641005
gene-camlg	175.241	-2.60784	0.701145	-3.71941	0.000199691	0.000979454
gene-ttyh3a	106.44	-2.60702	0.683632	-3.81349	0.000137017	0.000708191
gene-g3bp1	4461.16	-2.60663	0.466305	-5.58998	2.27101e-08	3.42692e-07
gene-fdxacb1	381.802	-2.60555	0.539777	-4.8271	1.38538e-06	1.28826e-05
gene-ror1	101.222	-2.60388	0.682975	-3.81256	0.000137535	0.000710382
gene-bag4	743.72	-2.60321	0.552387	-4.71265	2.44514e-06	2.1126e-05
gene-dcps	337.751	-2.60159	0.595063	-4.37196	1.23134e-05	8.6783e-05
gene-cul9	138.207	-2.60054	0.646576	-4.02202	5.77016e-05	0.00033359
gene-btaf1	2120.36	-2.60051	0.47789	-5.44165	5.27893e-08	7.06348e-07
gene-zgc:56676	2432.71	-2.59997	0.477722	-5.44244	5.25546e-08	7.03798e-07
gene-LOC100332191	63.3599	-2.59937	0.802313	-3.23985	0.00119593	0.00451761
gene-chpf2	258.539	-2.59754	0.56929	-4.56278	5.04814e-06	3.99762e-05
gene-lamp2	4638.01	-2.59703	0.523341	-4.96242	6.9622e-07	7.02387e-06
gene-unc13bb	210.456	-2.59519	0.691986	-3.75035	0.000176588	0.000880609
gene-rnf103	401.428	-2.59267	0.533648	-4.85839	1.18342e-06	1.12402e-05
gene-trmt12	321.972	-2.59045	0.543518	-4.76609	1.8784e-06	1.67923e-05
gene-zgc:112185	474.11	-2.58629	0.625516	-4.13466	3.55485e-05	0.000220104
gene-fam222bb	859.811	-2.586	0.506569	-5.10493	3.30909e-07	3.59608e-06
gene-slc25a36b	111.121	-2.58558	0.745717	-3.46725	0.000525818	0.00224039
gene-pou2f1a	304.588	-2.58454	0.71274	-3.6262	0.000287618	0.00134082
gene-rab41-2	177.847	-2.5817	0.609028	-4.23904	2.24474e-05	0.000146928
gene-os9-2	297.37	-2.57887	0.600456	-4.29485	1.74811e-05	0.000117752
gene-top1mt	613.938	-2.57767	0.672845	-3.83099	0.000127627	0.000664962
gene-arl8	653.825	-2.57672	0.511984	-5.03282	4.83324e-07	5.0702e-06
gene-si:dkeyp-68b7.7	467.655	-2.57664	0.711494	-3.62145	0.000292955	0.00136124
gene-fxn	447.285	-2.57663	0.552468	-4.66386	3.10337e-06	2.60394e-05
gene-cdk7	907.74	-2.57565	0.498435	-5.16747	2.37282e-07	2.68675e-06
gene-hiat1a	571.343	-2.57457	0.530943	-4.84905	1.24055e-06	1.17183e-05
gene-pdia6	1650.09	-2.57417	0.526615	-4.88814	1.01793e-06	9.84085e-06
gene-slc48a1b	161.512	-2.57371	0.717304	-3.58804	0.000333175	0.00151754
gene-spout1	544.15	-2.5719	0.520328	-4.94285	7.69898e-07	7.67529e-06
gene-unc119b	565.635	-2.57167	0.695963	-3.69512	0.000219784	0.0010642
gene-eef2a.1	214.377	-2.57128	0.695812	-3.69538	0.000219562	0.00106335
gene-oxsr1a	86.5383	-2.56996	0.785054	-3.27361	0.00106184	0.00409777
gene-htr5ab	100.341	-2.5693	0.808206	-3.17902	0.00147774	0.0054258
gene-fbxo34	1211.22	-2.56901	0.501419	-5.12348	2.99951e-07	3.31363e-06
gene-stx11a	452.313	-2.56854	0.528935	-4.85605	1.19749e-06	1.13494e-05
gene-tmem132e	121.581	-2.56783	0.745326	-3.44525	0.000570535	0.0023998
gene-slc25a1a	574.071	-2.56583	0.513578	-4.99599	5.85357e-07	6.0345e-06
gene-plcg1	430.05	-2.56454	0.538322	-4.76395	1.8984e-06	1.6948e-05
gene-dhx37	1049.55	-2.56368	0.492539	-5.20503	1.93965e-07	2.24597e-06
gene-igf2bp1	116.669	-2.56363	0.780881	-3.28299	0.00102712	0.00398615
gene-hccsb	486.17	-2.55837	0.678379	-3.77129	0.000162404	0.000819189
gene-ciz1a	263.683	-2.55631	0.663341	-3.85368	0.000116355	0.000613418
gene-zp3d.2	1114.6	-2.55592	0.557995	-4.58055	4.6376e-06	3.71139e-05
gene-ambra1b	195.96	-2.55521	0.806507	-3.16824	0.00153366	0.005594
gene-zgc:174935	473.518	-2.55461	0.643821	-3.96789	7.25119e-05	0.000405466
gene-si:ch211-165g14.1	864.469	-2.55139	0.711727	-3.58478	0.000337363	0.00153181
gene-rnf146	221.036	-2.55014	0.629511	-4.05098	5.1003e-05	0.000299753
gene-kcnh8	65.9127	-2.54928	0.780266	-3.2672	0.00108618	0.00417819
gene-trim47	243.956	-2.54884	0.643272	-3.96231	7.42275e-05	0.000414344
gene-LOC100150296	466.882	-2.54399	0.557901	-4.55992	5.11723e-06	4.04386e-05
gene-vps26b	116.36	-2.54291	0.832732	-3.05369	0.00226043	0.00776296
gene-ddx39ab-2	1017.63	-2.54265	0.672454	-3.78115	0.000156104	0.000792934
gene-btbd6b-2	52.1742	-2.54196	0.839145	-3.02922	0.00245187	0.00829727
gene-dhrs13a.3	196.412	-2.54174	0.584949	-4.34523	1.39132e-05	9.66215e-05
gene-uap1l1	269.748	-2.54075	0.722504	-3.51659	0.000437132	0.00191949
gene-qsox1	420.522	-2.53965	0.652216	-3.89388	9.86555e-05	0.000531475
gene-fbxl2	371.763	-2.53943	0.541821	-4.68685	2.77447e-06	2.36116e-05
gene-rfwd2	668.363	-2.53809	0.560044	-4.53194	5.84449e-06	4.52398e-05
gene-im:7147486	574.89	-2.53704	0.532414	-4.76517	1.88693e-06	1.68553e-05
gene-dph3	151.791	-2.53438	0.634755	-3.99269	6.53283e-05	0.000371109
gene-cep170b	425.003	-2.5343	0.703114	-3.60439	0.000312888	0.00143824
gene-h2afx	721.389	-2.53413	0.654323	-3.87291	0.000107543	0.000572015
gene-tbcc	828.224	-2.5332	0.495279	-5.11469	3.1426e-07	3.43821e-06
gene-plxnb2a	248.933	-2.53279	0.658074	-3.8488	0.0001187	0.000624476
gene-stim2b	121.323	-2.53222	0.68523	-3.69542	0.000219521	0.00106335
gene-herc2	91.661	-2.53119	0.712841	-3.55085	0.000383991	0.00171132
gene-aurka	2141.07	-2.53065	0.780098	-3.24401	0.00117858	0.00446694
gene-ccnh	741.735	-2.53047	0.504001	-5.02075	5.14694e-07	5.36949e-06
gene-cdc5l	2101.75	-2.52961	0.544366	-4.64689	3.36969e-06	2.79607e-05
gene-gtf3c6	328.744	-2.52872	0.561148	-4.50633	6.59591e-06	5.04537e-05
gene-fbxo38-2	130.717	-2.52864	0.673346	-3.75533	0.000173115	0.000866529
gene-LOC108191695	407.389	-2.52831	0.587717	-4.30193	1.69317e-05	0.000114426
gene-zmynd19	598.859	-2.52683	0.672254	-3.75874	0.000170771	0.000855366
gene-fgf14	283.782	-2.52678	0.669354	-3.77496	0.000160035	0.000809093
gene-ralgapa2	132.79	-2.52611	0.681088	-3.70894	0.000208132	0.00101471
gene-f11r.1	257.562	-2.52534	0.647512	-3.90007	9.61662e-05	0.000520288
gene-manba	445.612	-2.52461	0.826175	-3.05577	0.0022448	0.00771979
gene-vps18	492.371	-2.52354	0.521059	-4.84311	1.27823e-06	1.20292e-05
gene-msh3	76.3932	-2.52348	0.740476	-3.40791	0.000654621	0.00270138
gene-tmem223	281.421	-2.52205	0.569242	-4.43053	9.40016e-06	6.88394e-05
gene-ypel3	712.895	-2.52096	0.566395	-4.45088	8.5518e-06	6.32599e-05
gene-LOC100535691	504.157	-2.5201	0.527044	-4.78157	1.7393e-06	1.56869e-05
gene-btr18	282.73	-2.51897	0.809986	-3.10989	0.00187156	0.00662614
gene-hpdl	74.5354	-2.51722	0.819701	-3.0709	0.00213414	0.00739644
gene-hdr	480.982	-2.51529	0.53844	-4.67145	2.99087e-06	2.52448e-05
gene-impdh2	1521.16	-2.51441	0.664798	-3.78222	0.000155437	0.000790428
gene-vetz	148.676	-2.51401	0.682477	-3.68365	0.000229918	0.00110759
gene-plekhm2	343.56	-2.51363	0.547517	-4.59097	4.4119e-06	3.55712e-05
gene-dctd	341.693	-2.51332	0.556727	-4.51446	6.34776e-06	4.87694e-05
gene-nup160	903.453	-2.5112	0.801145	-3.13451	0.0017214	0.00617254
gene-si:ch211-188c16.1	1275.21	-2.50867	0.678118	-3.69947	0.000216053	0.00104882
gene-nol7	982.467	-2.5085	0.496272	-5.0547	4.3107e-07	4.5664e-06
gene-phka1a	401.479	-2.50781	0.759364	-3.30251	0.000958248	0.00375485
gene-slc39a6	722.761	-2.50742	0.595643	-4.2096	2.55827e-05	0.000164881
gene-focad	518.044	-2.50735	0.520692	-4.81543	1.46886e-06	1.35531e-05
gene-acss2	74.4379	-2.50722	0.73453	-3.41336	0.000641671	0.00265426
gene-LOC110439853	443.388	-2.50709	0.610838	-4.10434	4.05472e-05	0.000246413
gene-sp3a	204.148	-2.50454	0.618495	-4.04941	5.13468e-05	0.000301539
gene-thoc3	904.707	-2.50447	0.57371	-4.36539	1.26898e-05	8.91588e-05
gene-pde12	479.816	-2.50405	0.596587	-4.19729	2.70126e-05	0.000173113
gene-dusp12	511.575	-2.504	0.526335	-4.75743	1.96075e-06	1.74597e-05
gene-zgc:65997-3	101.364	-2.5029	0.697022	-3.59085	0.000329606	0.00150382
gene-rpp38	519.572	-2.49944	0.576746	-4.33369	1.4663e-05	0.000100955
gene-si:ch211-232h12.2	108.061	-2.49934	0.709876	-3.52081	0.000430231	0.00189248
gene-med7-2	368.213	-2.49871	0.720759	-3.46677	0.000526752	0.00224394
gene-sec31b	488.758	-2.49814	0.540404	-4.62272	3.78734e-06	3.09894e-05
gene-tmed1a	402.19	-2.49771	0.764737	-3.26611	0.00109037	0.00419145
gene-scamp2l	147.007	-2.49739	0.749575	-3.33174	0.000863042	0.00343246
gene-ppm1la	531.078	-2.49728	0.511738	-4.88	1.06085e-06	1.01907e-05
gene-znf507	188.074	-2.49709	0.593777	-4.20544	2.60575e-05	0.00016775
gene-atxn7l2b	753.411	-2.49682	0.516704	-4.83221	1.35025e-06	1.25971e-05
gene-si:ch73-382f3.1	733.895	-2.49637	0.511446	-4.88101	1.05545e-06	1.0143e-05
gene-phf12b-2	222.958	-2.49569	0.728308	-3.4267	0.000610974	0.00254255
gene-dab2	3690.25	-2.49444	0.541614	-4.60556	4.11359e-06	3.33678e-05
gene-asap1b	407.04	-2.49257	0.545317	-4.57087	4.85703e-06	3.8584e-05
gene-kpna2	4243.59	-2.49002	0.623444	-3.99398	6.4972e-05	0.000369778
gene-cltca	238.331	-2.48966	0.653208	-3.81143	0.000138164	0.000713143
gene-tm9sf4	610.536	-2.48965	0.513845	-4.84513	1.26528e-06	1.19221e-05
gene-pros1	476.912	-2.48898	0.700517	-3.55307	0.000380766	0.00169895
gene-serp1	1304.75	-2.48861	0.523948	-4.74973	2.03686e-06	1.80524e-05
gene-bin1b	402.402	-2.48814	0.634422	-3.9219	8.78531e-05	0.000480702
gene-amot	53.8282	-2.48759	0.821748	-3.02719	0.00246836	0.0083369
gene-rdh14a	283.733	-2.48645	0.562471	-4.42058	9.84356e-06	7.15819e-05
gene-ubap2b	306.466	-2.48403	0.744735	-3.33546	0.000851595	0.00339441
gene-nsdhl	864.873	-2.48324	0.560787	-4.42812	9.50563e-06	6.95444e-05
gene-nbeab	73.0138	-2.48251	0.815809	-3.043	0.00234235	0.00800067
gene-ptpn11a	185.566	-2.48202	0.610608	-4.06484	4.8066e-05	0.00028546
gene-gart	658.353	-2.48189	0.508176	-4.88392	1.03995e-06	1.00239e-05
gene-nup155	1114.64	-2.48157	0.622718	-3.98506	6.74622e-05	0.000380987
gene-zgc:171435	383.749	-2.47958	0.580047	-4.27479	1.91316e-05	0.000127357
gene-supt5h	152.112	-2.47839	0.817569	-3.03142	0.00243409	0.00824449
gene-tanc1a	288.417	-2.47825	0.654458	-3.78673	0.000152645	0.000777104
gene-wrap53	531.651	-2.47808	0.520005	-4.76549	1.884e-06	1.68357e-05
gene-gale	784.978	-2.47742	0.498626	-4.9685	6.7474e-07	6.82565e-06
gene-pcyox1l	310.098	-2.4764	0.552551	-4.48176	7.40293e-06	5.5614e-05
gene-ssh2a	1017.72	-2.47589	0.489979	-5.05306	4.34785e-07	4.59931e-06
gene-tspan7b	182.082	-2.47469	0.69154	-3.57853	0.000345536	0.00156361
gene-snrpa	1255.36	-2.47467	0.482054	-5.1336	2.8425e-07	3.15246e-06
[truncated: 504 more rows]

## Sheet: GSE142355_Degs_Ovary-downregula
gene_id	baseMean	log2FoldChange	lfcSE	stat	pvalue	padj
[truncated: 4,461 more rows]

## Sheet: GSE111882_Ovary-upregulated
gene_id	baseMean	log2FoldChange	lfcSE	stat	pvalue	padj
[truncated: 2,947 more rows]

[truncated: 4 more sheets: GSE111882_Degs_Ovary-downregula, Overlap-DEGs, Overlap_Ovary-upregulated DEGs, Overlap_Ovary-downregulated DEG]
