# Supplementary material for: Comprehensive Transcriptome Analysis Reveals Sex-Specific Alternative Splicing Events in Zebrafish Gonads
Source: Life (Basel). 2022 Sep 16;12(9):1441. doi: 10.3390/life12091441 (PMC9501657; doi:10.3390/life12091441)
Supplement: Supplementary file 1 [file life-12-01441-s001.zip › Table S2.xlsx]

## Sheet: chromosome proportion of DEGs
	Ovary-upregulated DEGs on current chromosome/Total genes on current chromosome(%)		Ovary-downregulated DEGs on current chromosome/Total genes on current chromosome(%)		ratio
chr1	3.09423	chr1	7.24332		2.34091
chr2	3.98352	chr2	7.3489		1.84483
chr3	3.30117	chr3	4.62164		1.4
chr4	0.369945	chr4	1.49254		4.03448
chr5	4.54274	chr5	6.45547		1.42105
chr6	3.02782	chr6	7.44681		2.45946
chr7	2.88875	chr7	5.96189		2.06383
chr8	3.04288	chr8	6.50069		2.13636
chr9	5.13796	chr9	5.32826		1.03704
chr10	4.14313	chr10	6.96798		1.68182
chr11	4.00844	chr11	7.48945		1.86842
chr12	3.13076	chr12	6.07735		1.94118
chr13	3.36538	chr13	7.78846		2.31429
chr14	4.15335	chr14	5.96379		1.4359
chr15	3.45679	chr15	6.17284		1.78571
chr16	4.42122	chr16	9.24437		2.09091
chr17	4.44646	chr17	7.44102		1.67347
chr18	2.86976	chr18	7.94702		2.76923
chr19	5.62561	chr19	7.56547		1.34483
chr20	3.56883	chr20	8.01165		2.2449
chr21	4.02635	chr21	7.17423		1.78182
chr22	3.35938	chr22	5.07812		1.51163
chr23	3.06931	chr23	7.12871		2.32258
chr24	5.53506	chr24	9.10209		1.64444
chr25	2.6694	chr25	8.62423		3.23077
chrM	0	chrM	0		#DIV/0!

## Sheet: Ovary-upregulated DEGs
	Ovary-upregulated DEGs in chromosome
chr1	44
chr10	44
chr11	38
chr12	34
chr13	35
chr14	39
chr15	42
chr16	55
chr17	49
chr18	26
chr19	58
chr2	58
chr20	49
chr21	55
chr22	43
chr23	31
chr24	45
chr25	26
chr3	65
chr4	29
chr5	76
chr6	37
chr7	47
chr8	44
chr9	54

## Sheet: Ovary-downregulated DEGs
	Ovary-upregulated DEGs in chromosome
chr1	103
chr10	74
chr11	71
chr12	66
chr13	81
chr14	56
chr15	75
chr16	115
chr17	82
chr18	72
chr19	78
chr2	107
chr20	110
chr21	98
chr22	65
chr23	72
chr24	74
chr25	84
chr3	91
chr4	117
chr5	108
chr6	91
chr7	97
chr8	94
chr9	56
