# Supplementary material for: Comprehensive Transcriptome Analysis Reveals Sex-Specific Alternative Splicing Events in Zebrafish Gonads
Source: Life (Basel). 2022 Sep 16;12(9):1441. doi: 10.3390/life12091441 (PMC9501657; doi:10.3390/life12091441)
Supplement: Supplementary file 1 [file life-12-01441-s001.zip › Table S3.xlsx]

## Sheet: GSE142352_degs_enrich.go.BP.df
	ID	Description	GeneRatio	BgRatio	pvalue	p.adjust	qvalue	geneID	Count
GO:0035082	GO:0035082	axoneme assembly	35/4227	47/17036	1.14473e-12	2.82703e-09	2.65183e-09	dnajb13/ccdc114/dnaaf2/pih1d2/dnah5/dnali1/dnal1/dnaaf4/lrriq1/iqcg/gas8/daw1/spag1a/ccdc39/lrrc6/cfap206/rp1l1b/drc1/tbc1d32/dnai1.2/dnai1.1/dnah5l/dnaaf3l/dnaaf3/ccdc103/rsph9/dzip1/ccdc65/ttc26/ccdc151/ccdc40/ttll3/dnaaf1/si:dkey-208b23.5/dnah7	35
GO:0120031	GO:0120031	plasma membrane bounded cell projection assembly	133/4227	311/17036	2.16595e-12	2.82703e-09	2.65183e-09	si:ch73-222h13.1/si:dkey-26i13.8/arl13b/arl6/gpm6ab/tekt4/ift46/dnajb13/dbnla/prickle2b/srgap2/ptpdc1a/ccdc114/cby1/cdc42ep1a/foxj1b/ablim2/ablim1b/llgl2/cep131/tekt3/cdc42ep4b/dnaaf2/dld/pax2a/wdr35/fgfr2/cetn4/fmr1/sept6/lect2l/ehd1a/ift80/clrn1/sirt2/nek8/pih1d2/rilp/tekt1/dync2h1/dnah5/enpp2/itga8/dnali1/ahi1/sh3yl1/dnal1/ttbk2a/wtip/dnaaf4/cfap161/lrriq1/iqcg/gas8/cep126/daw1/cfap20/tekt2/sp…	133
GO:0030031	GO:0030031	cell projection assembly	140/4227	333/17036	2.66868e-12	2.82703e-09	2.65183e-09	si:ch73-222h13.1/si:dkey-26i13.8/arl13b/arl6/gpm6ab/tekt4/ift46/dnajb13/dbnla/prickle2b/srgap2/ptpdc1a/ccdc114/rac1a/cby1/cdc42ep1a/foxj1b/ablim2/rhoq/ablim1b/llgl2/cep131/tekt3/cdc42ep4b/dnaaf2/dld/pax2a/wdr35/fgfr2/cetn4/fmr1/sept6/lect2l/ehd1a/ift80/clrn1/sirt2/nek8/pih1d2/rilp/tekt1/dync2h1/dnah5/enpp2/itga8/dnali1/ahi1/sh3yl1/dnal1/ttbk2a/wtip/dnaaf4/cfap161/lrriq1/iqcg/gas8/cep126/daw1/cfap…	140
GO:0060271	GO:0060271	cilium assembly	115/4227	263/17036	1.20984e-11	9.6122e-09	9.01651e-09	si:ch73-222h13.1/si:dkey-26i13.8/arl13b/arl6/tekt4/ift46/dnajb13/prickle2b/ptpdc1a/ccdc114/cby1/foxj1b/llgl2/cep131/tekt3/dnaaf2/dld/pax2a/wdr35/fgfr2/cetn4/sept6/lect2l/ehd1a/ift80/clrn1/sirt2/nek8/pih1d2/rilp/tekt1/dync2h1/dnah5/enpp2/itga8/dnali1/ahi1/dnal1/ttbk2a/wtip/dnaaf4/cfap161/lrriq1/iqcg/gas8/cep126/daw1/cfap20/tekt2/spag1a/snx10a/gmnn/fam92a1/elmo1/ccdc13/cdc14aa/ccdc39/tctex1d1/ift57…	115
GO:0044782	GO:0044782	cilium organization	117/4227	275/17036	6.7405e-11	4.28426e-08	4.01876e-08	si:ch73-222h13.1/si:dkey-26i13.8/arl13b/arl6/tekt4/ift46/dnajb13/prickle2b/ptpdc1a/ccdc114/cby1/foxj1b/llgl2/cep131/tekt3/dnaaf2/dld/pax2a/wdr35/fgfr2/cetn4/sept6/lect2l/ehd1a/ift80/clrn1/sirt2/nek8/pih1d2/rilp/tekt1/dync2h1/dnah5/enpp2/itga8/dnali1/ahi1/dnal1/ttbk2a/wtip/dnaaf4/cfap161/lrriq1/iqcg/gas8/cep126/daw1/cfap20/tekt2/spag1a/snx10a/gmnn/fam92a1/elmo1/ccdc13/cdc14aa/ccdc39/tctex1d1/ift57…	117
GO:0003341	GO:0003341	cilium movement	42/4227	68/17036	1.12084e-10	5.93674e-08	5.56883e-08	si:ch73-222h13.1/dnah6/tekt4/rfx3/dnah1/ccdc114/dnah9/cep131/tekt3/spa17/tekt1/dnaaf4/zbbx/gas8/cfap20/tekt2/ccdc39/ift57/lrrc6/cfap206/afg1lb/drc1/dnai1.2/dnai1.1/cfap53/ippk/lrrc23/dnaaf3/dnah3/glis2b/ccdc103/foxj1a/rsph9/wdr66/ccdc65/ccdc151/dnah9l/ccdc40/ttll3/gle1/si:dkey-208b23.5/dnah7	42
GO:0001578	GO:0001578	microtubule bundle formation	35/4227	53/17036	2.75022e-10	1.2486e-07	1.17122e-07	dnajb13/ccdc114/dnaaf2/pih1d2/dnah5/dnali1/dnal1/dnaaf4/lrriq1/iqcg/gas8/daw1/spag1a/ccdc39/lrrc6/cfap206/rp1l1b/drc1/tbc1d32/dnai1.2/dnai1.1/dnah5l/dnaaf3l/dnaaf3/ccdc103/rsph9/dzip1/ccdc65/ttc26/ccdc151/ccdc40/ttll3/dnaaf1/si:dkey-208b23.5/dnah7	35
GO:0001539	GO:0001539	cilium or flagellum-dependent cell motility	17/4227	18/17036	6.89426e-10	2.2122e-07	2.07511e-07	tekt4/rfx3/tekt3/dnaaf2/zgc:66426/tekt1/daw1/cfap20/tekt2/ccdc39/cfap57/lrrc6/drc1/efhc1/foxj1a/rsph9/ccdc65	17
GO:0060285	GO:0060285	cilium-dependent cell motility	17/4227	18/17036	6.89426e-10	2.2122e-07	2.07511e-07	tekt4/rfx3/tekt3/dnaaf2/zgc:66426/tekt1/daw1/cfap20/tekt2/ccdc39/cfap57/lrrc6/drc1/efhc1/foxj1a/rsph9/ccdc65	17
GO:0007017	GO:0007017	microtubule-based process	177/4227	475/17036	6.96098e-10	2.2122e-07	2.07511e-07	si:ch73-222h13.1/si:dkey-26i13.8/crmp1/dnah6/map9/bora/tekt4/zgc:65894/rfx3/apc/ewsr1a/katnal2/ift46/map6a/ska2/dnajb13/tuba7l/tuba2/dnah1/kif17/ccdc114/dnah9/kif20bb/ndel1a/llgl2/cep131/tekt3/dnaaf2/tuba4l/wdr35/nin/si:ch1073-266p11.2/aurkb/rgs14a/cetn4/cetn2/fmr1/ccdc69/diaph2/ccdc88b/si:ch211-235e9.8/pih1d2/spa17/eml2/tekt1/dync2h1/dnah5/gapdh/dync1i1/dnali1/stmn1b/map7a/dnal1/mapre3a/stard9/c…	177
GO:0034470	GO:0034470	ncRNA processing	108/4227	259/17036	1.44555e-09	4.17633e-07	3.91751e-07	trmt10c/ptcd1/exosc9/pwp2h/esf1/thumpd1/ddx56/fbxw11b/ints2/nsun5/mettl1/tsen2/ddx49/wdr18/rpusd4/gnl3l/rrp9/heatr1/snu13b/c1d/trmt2b/trmt5/si:dkey-85a20.4/ints10/thg1l/trmt12/ints5/exosc3/urb1/rrp8/pih1d2/mettl16/mrpl44/rbfa/gnl2/alkbh8/fbl/dcaf13/pop1/trmt61b/nol10/utp15/dus3l/exosc7/bop1/lin28a/nsun2/srfbp1/elp2/ago2/exosc4/imp3/nsun4/tyw3/ebna1bp2/riok1/rpf2/ints7/rpl7l1/trmt6/rexo4/pus1/nhp2…	108
GO:0070286	GO:0070286	axonemal dynein complex assembly	22/4227	28/17036	3.45996e-09	9.16314e-07	8.59528e-07	ccdc114/dnaaf2/pih1d2/dnah5/dnali1/dnal1/dnaaf4/lrriq1/daw1/spag1a/ccdc39/drc1/dnai1.2/dnai1.1/dnah5l/dnaaf3l/dnaaf3/ccdc103/ccdc65/ccdc151/ccdc40/dnah7	22
GO:0000226	GO:0000226	microtubule cytoskeleton organization	122/4227	324/17036	1.58713e-07	3.87991e-05	3.63947e-05	crmp1/map9/bora/zgc:65894/apc/ewsr1a/katnal2/map6a/ska2/dnajb13/tuba7l/tuba2/ccdc114/ndel1a/llgl2/cep131/dnaaf2/tuba4l/nin/si:ch1073-266p11.2/aurkb/rgs14a/cetn4/cetn2/ccdc69/diaph2/ccdc88b/pih1d2/eml2/dnah5/gapdh/dnali1/stmn1b/map7a/dnal1/mapre3a/ccdc88c/kiz/wtip/dnaaf4/lrriq1/kif23/pard6a/iqcg/gas8/cep126/daw1/map7d1b/spag1a/stmn1a/pard6gb/atat1/ccdc13/cdc14aa/ccdc39/usp33/map4l/map1sb/lrrc6/tub…	122
GO:0034660	GO:0034660	ncRNA metabolic process	126/4227	339/17036	2.30916e-07	5.2418e-05	4.91695e-05	trmt10c/ptcd1/exosc9/pwp2h/dis3/esf1/thumpd1/ddx56/fbxw11b/ints2/nsun5/mettl1/tsen2/ddx49/wdr18/rpusd4/gnl3l/rrp9/heatr1/snu13b/c1d/trmt2b/trmt5/snapc1b/si:dkey-85a20.4/ints10/thg1l/trmt12/ints5/exosc3/urb1/nars2/rrp8/pih1d2/mettl16/cd3eap/mrpl44/trim71/rbfa/gnl2/alkbh8/fbl/dcaf13/pop1/trmt61b/qrsl1/nol10/utp15/dus3l/exosc7/bop1/lin28a/vars2/nsun2/srfbp1/elp2/ago2/exosc4/imp3/nsun4/rpap2/tyw3/ebn…	126
GO:0007018	GO:0007018	microtubule-based movement	78/4227	187/17036	2.60391e-07	5.51682e-05	5.17494e-05	si:ch73-222h13.1/si:dkey-26i13.8/dnah6/tekt4/rfx3/ift46/dnah1/kif17/ccdc114/dnah9/kif20bb/ndel1a/cep131/tekt3/wdr35/fmr1/si:ch211-235e9.8/spa17/tekt1/dync2h1/dnah5/dync1i1/stard9/kif6/dnaaf4/zbbx/kif23/gas8/kifc3/cfap20/tekt2/ccdc39/kif1ab/ift57/lrrc6/cfap206/kif25/afg1lb/drc1/kif26bb/ift172/kif13bb/wdr34/dnai1.2/dnai1.1/cfap53/ippk/lrrc23/tmem201/lca5/mak/dnah5l/dnaaf3/dnah3/kif21a/glis2b/mapk8i…	78
GO:0006364	GO:0006364	rRNA processing	61/4227	138/17036	4.83955e-07	9.61256e-05	9.01685e-05	exosc9/pwp2h/esf1/ddx56/fbxw11b/nsun5/ddx49/wdr18/gnl3l/rrp9/heatr1/snu13b/c1d/exosc3/urb1/rrp8/pih1d2/mettl16/rbfa/gnl2/fbl/dcaf13/nol10/utp15/exosc7/bop1/srfbp1/imp3/nsun4/ebna1bp2/riok1/rpf2/rpl7l1/rexo4/nhp2/ddx52/dkc1/bysl/ftsj3/fam207a/ncl/exosc10/znhit6/rrs1/rrp7a/ddx47/tbl3/znhit3/las1l/exosc2/ddx54/wdr12/nol11/nop10/mphosph10/dhx37/tsr2/abt1/rrp1/ddx18/wdr75	61
GO:0016072	GO:0016072	rRNA metabolic process	66/4227	154/17036	6.63919e-07	0.000124114	0.000116422	exosc9/pwp2h/dis3/esf1/ddx56/fbxw11b/nsun5/ddx49/wdr18/gnl3l/rrp9/heatr1/snu13b/c1d/exosc3/urb1/rrp8/pih1d2/mettl16/cd3eap/rbfa/gnl2/fbl/dcaf13/nol10/utp15/exosc7/bop1/srfbp1/exosc4/imp3/nsun4/ebna1bp2/riok1/chd7/rpf2/taf1b/rpl7l1/rexo4/nhp2/ddx52/dkc1/bysl/ftsj3/fam207a/ncl/exosc10/znhit6/rrs1/rrp7a/ddx47/tbl3/znhit3/las1l/exosc2/ddx54/wdr12/nol11/nop10/mphosph10/dhx37/tsr2/abt1/rrp1/ddx18/wdr75	66
GO:1901137	GO:1901137	carbohydrate derivative biosynthetic process	164/4227	484/17036	3.56491e-06	0.000629405	0.000590399	gart/atic/si:dkey-26i13.5/chst12b/dctd/mogs/si:dkey-37g12.1/pgam1b/st8sia4/pigo/b3galt6/st3gal8/pfklb/cant1b/st6galnac1.2/nme2a/adkb/chst3b/pank2/elovl6l/galnt2/adka/b3gat2/chst3a/cox5b2/hs3st1/nme5/st3gal5/fut11/mgat4b/syvn1/zgc:92907/trmt12/fkrp/gucy2f/mgat1a/itm2ca/gal3st2/adcy3a/pomgnt2/adcy2a/gapdh/galnt1/alg2/pigv/gapdhs/ext1a/gnpnat1/eno4/b3gnt2b/acss1/si:ch211-132f19.7/fut8a/cmpk2/alk/gpi…	164
GO:0042254	GO:0042254	ribosome biogenesis	81/4227	209/17036	5.17772e-06	0.000866042	0.000812372	exosc9/pwp2h/esf1/ltv1/ddx56/fbxw11b/nle1/nsun5/ddx49/wdr18/gnl3l/rrp9/heatr1/snu13b/c1d/urb2/polr1c/exosc3/nmd3/urb1/rrp8/pih1d2/mettl16/rbfa/gnl2/fbl/dcaf13/wdr43/nol10/utp15/exosc7/bop1/mrpl36/srfbp1/imp3/nsun4/ebna1bp2/riok1/znf622/rpf2/cebpz/rpl7l1/bxdc2/rexo4/sdad1/noc4l/nhp2/mrpl22/ddx52/dkc1/mrpl20/bysl/ftsj3/fam207a/ncl/exosc10/znhit6/rrs1/rrp7a/ddx47/mrps7/ppan/tbl3/rcl1/znhit3/las1l/su…	81
GO:0051726	GO:0051726	regulation of cell cycle	150/4227	442/17036	8.34402e-06	0.00125456	0.00117681	fbxl18/map9/bora/junba/apc/si:ch211-57m13.9/ewsr1a/pmaip1/btg3/ccna1/prr11/ect2/id1/si:ch211-122l14.7/si:ch1073-526c11.3/pimr46/psme2/dbf4b/becn1/hexim1/eme1/waca/cep131/pimr47/si:ch211-202m22.1/pdcd2/zfyve26/mad2l1bp/cdkn3/fbxo5/si:ch1073-266p11.2/aurkb/si:dkey-27i16.2/pimr212/ccna2/sirt2/nf1a/pimr209/pimr108/si:dkey-79d12.5/hormad1/wnt4b/gnl2/phactr4b/ccne2/dbf4/nek10/fbxo43/pimr175/pimr168/si:…	150
GO:0009799	GO:0009799	specification of symmetry	102/4227	280/17036	8.68479e-06	0.00125456	0.00117681	dnah6/arl6/lmo7b/pkd2/rfx3/apc/tdgf1/ptpn11a/ift46/robo3/rargb/wdr18/trib3/dnah9/ppp4cb/foxh1/ep300a/foxj1b/armc4/tcf7l2/camk2g1/cep131/meis1b/dld/fgfr2/sept6/pitx2/pdlim7/nek8/enpp2/gdf6a/sybu/gdf3/ahi1/wtip/dnaaf4/pak1/daw1/eomesa/cfap20/snx10a/tdp2b/gmnn/rbm24a/ctnnb2/ccdc39/chd7/prrx1a/ift57/lrrc6/scn12aa/ankrd6b/meis2b/max/notch1a/dnai1.1/cfap53/dub/slc8a4a/ippk/lpar3/ncl/dnmt3bb.1/ubxn10/dn…	102
GO:0009855	GO:0009855	determination of bilateral symmetry	102/4227	280/17036	8.68479e-06	0.00125456	0.00117681	dnah6/arl6/lmo7b/pkd2/rfx3/apc/tdgf1/ptpn11a/ift46/robo3/rargb/wdr18/trib3/dnah9/ppp4cb/foxh1/ep300a/foxj1b/armc4/tcf7l2/camk2g1/cep131/meis1b/dld/fgfr2/sept6/pitx2/pdlim7/nek8/enpp2/gdf6a/sybu/gdf3/ahi1/wtip/dnaaf4/pak1/daw1/eomesa/cfap20/snx10a/tdp2b/gmnn/rbm24a/ctnnb2/ccdc39/chd7/prrx1a/ift57/lrrc6/scn12aa/ankrd6b/meis2b/max/notch1a/dnai1.1/cfap53/dub/slc8a4a/ippk/lpar3/ncl/dnmt3bb.1/ubxn10/dn…	102
GO:0022412	GO:0022412	cellular process involved in reproduction in multicellular organism	43/4227	96/17036	1.50929e-05	0.00208544	0.0019562	zp3c/nanos3/tdgf1/smad2/ca15b/zfyve26/psme4a/si:ch211-67f13.7/rgs14a/nme5/dnd1/hormad1/paqr7b/zp3d.2/zp3d.1/zgc:173556/zp3/zp3.2/iqcg/spaca4l/zp3b/buc/mei4/zar1/zp3a.2/zp3a.1/gsdf/amh/wwtr1/birc5b/hnrnpa1b/abhd2b/sycp3/pde3a/ccnb1/mettl3/bmp15/cdh1/m1ap/grip2a/piwil1/hnrnpa3/kdm6a	43
GO:0003351	GO:0003351	epithelial cilium movement	18/4227	29/17036	2.30201e-05	0.00304825	0.00285934	dnah6/rfx3/dnah9/cep131/dnaaf4/gas8/ccdc39/ift57/lrrc6/cfap53/ippk/lrrc23/ccdc103/foxj1a/dnah9l/ccdc40/gle1/si:dkey-208b23.5	18
GO:0016584	GO:0016584	nucleosome positioning	14/4227	20/17036	2.65969e-05	0.00338099	0.00317147	si:dkey-108k21.10/si:dkey-108k21.21/zgc:153405/si:ch211-113a14.24/smarca1/histh1l/h1m/si:dkey-23a13.9/si:dkey-23a13.17/si:ch73-368j24.11/si:ch73-368j24.12/si:ch1073-153i20.4/zgc:110425/zgc:163061	14
GO:0007346	GO:0007346	regulation of mitotic cell cycle	93/4227	259/17036	4.01727e-05	0.00491034	0.00460604	map9/bora/si:ch211-57m13.9/ewsr1a/pmaip1/btg3/si:ch211-122l14.7/si:ch1073-526c11.3/pimr46/psme2/eme1/pimr47/si:ch211-202m22.1/pdcd2/mad2l1bp/fbxo5/aurkb/pimr212/pimr209/pimr108/si:dkey-79d12.5/wnt4b/gnl2/pimr175/pimr168/id2a/gpr132a/pimr60/pimr62/trpm7/si:ch211-160d20.5/pimr179/mcl1a/top2b/pimr82/ints3/cdc14aa/ppp1r7/pimr141/pimr54/pimr140/pimr50/pimr53/pimr65/pimr66/pimr67/pimr68/plk3/dtl/anapc4…	93
GO:0007368	GO:0007368	determination of left/right symmetry	90/4227	252/17036	6.64995e-05	0.00782724	0.00734217	dnah6/arl6/lmo7b/pkd2/rfx3/apc/tdgf1/ptpn11a/rargb/wdr18/trib3/dnah9/foxh1/ep300a/foxj1b/armc4/tcf7l2/camk2g1/cep131/meis1b/dld/fgfr2/sept6/pitx2/pdlim7/nek8/enpp2/gdf3/ahi1/wtip/dnaaf4/pak1/daw1/cfap20/snx10a/tdp2b/gmnn/rbm24a/ccdc39/chd7/prrx1a/ift57/lrrc6/scn12aa/meis2b/notch1a/dnai1.1/cfap53/dub/slc8a4a/ippk/lpar3/ncl/dnmt3bb.1/ubxn10/dnah5l/ndrg4/mical2b/cald1b/glis2b/ttc25/smarca4a/adap2/fl…	90
GO:0000278	GO:0000278	mitotic cell cycle	154/4227	476/17036	0.000103451	0.0117417	0.011014	fbxl18/ncapd3/map9/bora/zgc:65894/zdhhc8a/apc/si:ch211-57m13.9/ewsr1a/pmaip1/btg3/ska2/ccna1/tuba7l/tuba2/si:ch211-122l14.7/si:ch1073-526c11.3/pimr46/psme2/eme1/ndel1a/meis1b/tuba4l/pimr47/si:ch211-202m22.1/pdcd2/zfyve26/mad2l1bp/fbxo5/si:ch1073-266p11.2/aurkb/cetn4/cetn2/pimr212/diaph2/ccna2/ppp2r2ba/usp16/pimr209/trim71/dscc1/pimr108/si:dkey-79d12.5/wnt4b/gnl2/ccne2/pimr175/pimr168/snx9a/id2a/g…	154
GO:0048609	GO:0048609	multicellular organismal reproductive process	54/4227	137/17036	0.000107972	0.0118322	0.011099	zp3c/tsga10/nanos3/tdgf1/smad2/ca15b/zfyve26/psme4a/si:ch211-67f13.7/vip/rgs14a/nme5/dnd1/diaph2/hormad1/paqr7b/zp3d.2/zp3d.1/zgc:173556/zp3/zp3.2/iqcg/spaca4l/zp3b/buc/mei4/zar1/zp3a.2/zp3a.1/gsdf/sass6/amh/wwtr1/birc5b/si:ch211-225h24.2/hnrnpa1b/nanog/abhd2b/sycp3/pde3a/hsf5/ccnb1/mettl3/dnaaf1/lgr4/bmp15/cdh1/m1ap/grip2a/spata6/ggt1a/piwil1/hnrnpa3/kdm6a	54
GO:0036158	GO:0036158	outer dynein arm assembly	9/4227	11/17036	0.000117709	0.0124694	0.0116966	ccdc114/dnah5/dnal1/dnaaf4/lrriq1/dnai1.2/dnai1.1/dnah5l/ccdc151	9
GO:0032504	GO:0032504	multicellular organism reproduction	54/4227	138/17036	0.000135049	0.0138447	0.0129867	zp3c/tsga10/nanos3/tdgf1/smad2/ca15b/zfyve26/psme4a/si:ch211-67f13.7/vip/rgs14a/nme5/dnd1/diaph2/hormad1/paqr7b/zp3d.2/zp3d.1/zgc:173556/zp3/zp3.2/iqcg/spaca4l/zp3b/buc/mei4/zar1/zp3a.2/zp3a.1/gsdf/sass6/amh/wwtr1/birc5b/si:ch211-225h24.2/hnrnpa1b/nanog/abhd2b/sycp3/pde3a/hsf5/ccnb1/mettl3/dnaaf1/lgr4/bmp15/cdh1/m1ap/grip2a/spata6/ggt1a/piwil1/hnrnpa3/kdm6a	54
GO:0007276	GO:0007276	gamete generation	53/4227	135/17036	0.000140401	0.0139436	0.0130795	zp3c/tsga10/nanos3/tdgf1/smad2/ca15b/zfyve26/psme4a/si:ch211-67f13.7/rgs14a/nme5/dnd1/diaph2/hormad1/paqr7b/zp3d.2/zp3d.1/zgc:173556/zp3/zp3.2/iqcg/spaca4l/zp3b/buc/mei4/zar1/zp3a.2/zp3a.1/gsdf/sass6/amh/wwtr1/birc5b/si:ch211-225h24.2/hnrnpa1b/nanog/abhd2b/sycp3/pde3a/hsf5/ccnb1/mettl3/dnaaf1/lgr4/bmp15/cdh1/m1ap/grip2a/spata6/ggt1a/piwil1/hnrnpa3/kdm6a	53
GO:0032259	GO:0032259	methylation	69/4227	187/17036	0.000149162	0.0143647	0.0134745	eed/zc3h13/prmt9/setd4/apc/nsun5/mettl1/comtb/setmar/lcmt1/trmt2b/trmt5/si:dkey-85a20.4/trmt12/rrp8/mettl16/trmt11/mettl6/alkbh8/fbl/trmt61b/pcmtl/smyd2a/dnmt3ab/ehmt2/setdb1a/rnmt/jarid2b/nsun2/nsun4/tyw3/tgs1/mettl13/trmt6/pou5f3/wdr5/ftsj3/mettl21a/prdm5/dnmt3bb.2/dnmt3bb.1/cmtr1/prdm14/prmt6/trdmt1/bmt2/mettl2a/carm1/shmt1/dnmt1/coq5/trmt2a/ehmt1a/ntmt1/hemk1/shmt2/mettl3/cmtr2/trmt44/mettl4/…	69
GO:0019953	GO:0019953	sexual reproduction	60/4227	158/17036	0.0001589	0.014571	0.013668	zp3c/tsga10/nanos3/tdgf1/smad2/park7/ca15b/zfyve26/psme4a/si:ch211-67f13.7/vip/rgs14a/nme5/dnd1/diaph2/hormad1/paqr7b/zp3d.2/zp3d.1/zgc:173556/zp3/zp3.2/iqcg/trpc6b/spaca4l/zp3b/buc/mei4/zar1/zp3a.2/zp3a.1/gsdf/stx2a/trpc2b/sass6/amh/wwtr1/birc5b/si:ch211-225h24.2/hnrnpa1b/nanog/abhd2b/sycp3/bmb/pde3a/hsf5/ccnb1/mettl3/dnaaf1/lgr4/bmp15/cdh1/m1ap/grip2a/spata6/ggt1a/piwil1/hnrnpa3/kdm6a/plcd4b	60
GO:0007281	GO:0007281	germ cell development	34/4227	77/17036	0.000160474	0.014571	0.013668	zp3c/nanos3/smad2/zfyve26/psme4a/si:ch211-67f13.7/dnd1/hormad1/paqr7b/zp3d.2/zp3d.1/zgc:173556/zp3/zp3.2/iqcg/spaca4l/zp3b/buc/mei4/zar1/zp3a.2/zp3a.1/gsdf/amh/wwtr1/hnrnpa1b/abhd2b/sycp3/pde3a/ccnb1/mettl3/bmp15/piwil1/hnrnpa3	34
GO:0046777	GO:0046777	protein autophosphorylation	62/4227	165/17036	0.000176165	0.0155514	0.0145877	melk/si:ch211-57m13.9/mapkapk3/si:ch211-122l14.7/si:ch1073-526c11.3/pimr46/camk2g1/pimr47/si:ch211-202m22.1/pimr212/si:ch211-167j9.5/pimr209/pimr108/ptk2ab/si:ch73-340m8.2/ptk2ba/pimr175/pimr168/pimr60/pimr62/si:ch211-160d20.5/pimr179/pimr82/yrk/tnk2b/pimr141/pimr54/pimr140/pimr50/pimr53/pimr65/pimr66/pimr67/mknk2a/pimr68/yes1/ppp2r5a/ppp2r5ea/pimr130/pimr136/pimr131/pimr128/pimr129/pimr115/pimr1…	62
GO:0044703	GO:0044703	multi-organism reproductive process	60/4227	159/17036	0.000194218	0.0166818	0.0156479	zp3c/tsga10/nanos3/tdgf1/smad2/park7/ca15b/zfyve26/psme4a/si:ch211-67f13.7/vip/rgs14a/nme5/dnd1/diaph2/hormad1/paqr7b/zp3d.2/zp3d.1/zgc:173556/zp3/zp3.2/iqcg/trpc6b/spaca4l/zp3b/buc/mei4/zar1/zp3a.2/zp3a.1/gsdf/stx2a/trpc2b/sass6/amh/wwtr1/birc5b/si:ch211-225h24.2/hnrnpa1b/nanog/abhd2b/sycp3/bmb/pde3a/hsf5/ccnb1/mettl3/dnaaf1/lgr4/bmp15/cdh1/m1ap/grip2a/spata6/ggt1a/piwil1/hnrnpa3/kdm6a/plcd4b	60
GO:0030001	GO:0030001	metal ion transport	147/4227	458/17036	0.000221117	0.0184923	0.0173463	atp1a1a.5/slc24a2/fam155a/si:dkey-28b4.8/pkd2/trpc4a/ryr1a/rem1/slc8a1a/wnk2/slc39a11/scn4aa/letm1/slc38a6/kcns3a/kcnk1b/slc8a3/kcnh5b/vip/klhl3/hephl1a/atp1b3b/si:ch211-261a10.5/scn3b/slc13a5b/stim1a/trpc2a/kcnj13/kcnj14/si:ch211-254p10.2/kcnn4/si:dkey-201i6.2/atp2c1/scn1ba/zgc:162160/fxyd1/kcnk10b/lgals3b/kcnh1a/trpm7/hcn4/slc12a1/slc30a4/neto2b/si:ch211-260p9.3/kcng4a/itpr2/bcl2l10/trpc6b/kcnk…	147
GO:0007292	GO:0007292	female gamete generation	26/4227	55/17036	0.000247205	0.020144	0.0188956	zp3c/nanos3/smad2/zfyve26/si:ch211-67f13.7/diaph2/hormad1/paqr7b/zp3d.2/zp3d.1/zgc:173556/zp3/zp3.2/zp3b/buc/mei4/zar1/zp3a.2/zp3a.1/gsdf/wwtr1/birc5b/pde3a/ccnb1/mettl3/bmp15	26
GO:0000463	GO:0000463	maturation of LSU-rRNA from tricistronic rRNA transcript (SSU-rRNA, 5.8S rRNA, LSU-rRNA)	10/4227	14/17036	0.000317893	0.024645	0.0231177	urb1/gnl2/bop1/rpf2/rpl7l1/ftsj3/znhit6/znhit3/wdr12/ddx18	10
GO:0048477	GO:0048477	oogenesis	24/4227	50/17036	0.00031795	0.024645	0.0231177	zp3c/nanos3/smad2/zfyve26/si:ch211-67f13.7/hormad1/paqr7b/zp3d.2/zp3d.1/zgc:173556/zp3/zp3.2/zp3b/buc/mei4/zar1/zp3a.2/zp3a.1/gsdf/wwtr1/pde3a/ccnb1/mettl3/bmp15	24
GO:0031936	GO:0031936	negative regulation of chromatin silencing	13/4227	21/17036	0.000339964	0.025724	0.0241298	si:dkey-108k21.10/si:dkey-108k21.21/zgc:153405/si:ch211-113a14.24/histh1l/h1m/si:dkey-23a13.9/si:dkey-23a13.17/si:ch73-368j24.11/si:ch73-368j24.12/si:ch1073-153i20.4/zgc:110425/zgc:163061	13
GO:0045815	GO:0045815	positive regulation of gene expression, epigenetic	15/4227	26/17036	0.000353046	0.0260926	0.0244756	wbp2/zmiz1a/si:dkey-108k21.10/si:dkey-108k21.21/zgc:153405/si:ch211-113a14.24/histh1l/h1m/si:dkey-23a13.9/si:dkey-23a13.17/si:ch73-368j24.11/si:ch73-368j24.12/si:ch1073-153i20.4/zgc:110425/zgc:163061	15
GO:0016556	GO:0016556	mRNA modification	9/4227	12/17036	0.000366474	0.0264694	0.024829	zc3h13/a1cf/fmr1/pus1/dkc1/cmtr1/pus3/mettl3/cmtr2	9
GO:0030029	GO:0030029	actin filament-based process	157/4227	499/17036	0.000389817	0.0275298	0.0258237	fscn1b/dmd/tmod1/cnn1a/si:ch211-176g13.8/myo18aa/dbnla/mef2ca/ect2/srgap2/slc8a1a/flnb/rac3b/rac1a/baiap2l1a/mlst8/cdc42ep1a/ablim2/rhoq/llgl2/cdc42ep4b/fmn2b/pdlim1/plek2/cfl1l/sorbs2b/diaph2/pdlim7/scn3b/zgc:158689/bves/tmod4/phactr4b/scn1ba/spire1b/ptk2ba/cdc42bpaa/cfl2/si:ch211-195o20.7/sptbn5/si:ch211-175f11.5/evla/smyd2a/prox1a/sptb/asb2b/iqsec3b/kif23/vaspb/ehd2b/scn1bb/fhod3a/tpm3/spire1a…	157
GO:0000466	GO:0000466	maturation of 5.8S rRNA from tricistronic rRNA transcript (SSU-rRNA, 5.8S rRNA, LSU-rRNA)	12/4227	19/17036	0.000445941	0.0306597	0.0287597	exosc9/exosc3/urb1/gnl2/exosc7/bop1/ftsj3/exosc10/rrs1/exosc2/wdr12/abt1	12
GO:0016073	GO:0016073	snRNA metabolic process	19/4227	37/17036	0.000453432	0.0306597	0.0287597	exosc9/ints2/snapc1b/ints10/ints5/exosc3/mettl16/exosc7/exosc4/rpap2/ints7/snapc1a/nhp2/dkc1/ell/exosc10/exosc2/nop10/ints6	19
GO:0060969	GO:0060969	negative regulation of gene silencing	14/4227	24/17036	0.000476783	0.031567	0.0296107	dnd1/si:dkey-108k21.10/si:dkey-108k21.21/zgc:153405/si:ch211-113a14.24/histh1l/h1m/si:dkey-23a13.9/si:dkey-23a13.17/si:ch73-368j24.11/si:ch73-368j24.12/si:ch1073-153i20.4/zgc:110425/zgc:163061	14
GO:0008610	GO:0008610	lipid biosynthetic process	97/4227	290/17036	0.000539668	0.0350013	0.0328322	msmo1/lef1/pi4k2a/tecrb/slc27a1b/rdh8b/apc/pigo/smpd1/tm7sf2/dgat2/zgc:77375/tamm41/pik3c2b/degs1/elovl6l/scdb/pdss2/ggps1/st3gal5/nsdhl/mid1ip1l/gal3st2/fdps/mboat7/pigv/ptdss1a/cyp11c1/crls1/rcor1/cers3b/pik3c2a/cyp19a1a/st3gal4/cyp51/cers2a/srd5a1/lpcat1/ptdss1b/acot11a/tecrl2b/elovl1a/ptgs2a/pld1a/rdh10b/cnr1/hsd3b2/nus1/si:ch73-21k16.1/st6galnac6/ch25hl2/smpd4/pgap2/pigs/faxdc2/cers1/cers5/m…	97
GO:0060968	GO:0060968	regulation of gene silencing	21/4227	43/17036	0.000554862	0.035267	0.0330814	dnd1/trim71/setdb1a/znf644a/nanog/si:dkey-108k21.10/si:dkey-108k21.21/zgc:153405/si:ch211-113a14.24/histh1l/h1m/tarbp2/si:dkey-23a13.9/si:dkey-23a13.17/si:ch73-368j24.11/si:ch73-368j24.12/si:ch1073-153i20.4/zgc:110425/ajuba/naa40/zgc:163061	21
GO:0071804	GO:0071804	cellular potassium ion transport	57/4227	155/17036	0.000590058	0.0360616	0.0338268	atp1a1a.5/pkd2/wnk2/kcns3a/kcnk1b/kcnh5b/atp1b3b/si:ch211-261a10.5/kcnj13/kcnj14/kcnn4/si:dkey-201i6.2/zgc:162160/kcnk10b/kcnh1a/hcn4/slc12a1/neto2b/kcng4a/kcnk6/kcnj1a.6/kcnj1a.5/kcnj1a.1/kcnj5/slc9a3.1/atp1b3a/slc12a7a/kcnn1a/si:rp71-39b20.4/kcnb2/kcnq3/kcnk2b/kcnk5b/kcns3b/kcnf1a/tmem38b/kcnh1b/atp1b2a/si:dkey-192j17.1/kcnj11l/kcna1a/hcn4l/kcnh6a/kcnc3a/kcnc2/wnk1b/kcnd2/kcnh7/kcnj3b/atp1b1a/s…	57
GO:0071805	GO:0071805	potassium ion transmembrane transport	57/4227	155/17036	0.000590058	0.0360616	0.0338268	atp1a1a.5/pkd2/wnk2/kcns3a/kcnk1b/kcnh5b/atp1b3b/si:ch211-261a10.5/kcnj13/kcnj14/kcnn4/si:dkey-201i6.2/zgc:162160/kcnk10b/kcnh1a/hcn4/slc12a1/neto2b/kcng4a/kcnk6/kcnj1a.6/kcnj1a.5/kcnj1a.1/kcnj5/slc9a3.1/atp1b3a/slc12a7a/kcnn1a/si:rp71-39b20.4/kcnb2/kcnq3/kcnk2b/kcnk5b/kcns3b/kcnf1a/tmem38b/kcnh1b/atp1b2a/si:dkey-192j17.1/kcnj11l/kcna1a/hcn4l/kcnh6a/kcnc3a/kcnc2/wnk1b/kcnd2/kcnh7/kcnj3b/atp1b1a/s…	57
GO:0009451	GO:0009451	RNA modification	44/4227	113/17036	0.000609341	0.0360632	0.0338283	zc3h13/thumpd1/nsun5/mettl1/rpusd4/a1cf/trmt5/si:dkey-85a20.4/thg1l/fmr1/trmt12/mettl16/alkbh8/fbl/trmt61b/rpusd2/nsun2/elp2/nsun4/tyw3/tgs1/trmt6/pus1/nhp2/dkc1/ftsj3/cmtr1/adarb2/pus3/pus7/qtrt1/dph3/trub2/nop10/elp4/mettl3/cmtr2/mtfmt/ctu2/trmt44/ctu1/wdr4/lcmt2/adat3	44
GO:0031935	GO:0031935	regulation of chromatin silencing	15/4227	27/17036	0.00061278	0.0360632	0.0338283	setdb1a/si:dkey-108k21.10/si:dkey-108k21.21/zgc:153405/si:ch211-113a14.24/histh1l/h1m/si:dkey-23a13.9/si:dkey-23a13.17/si:ch73-368j24.11/si:ch73-368j24.12/si:ch1073-153i20.4/zgc:110425/naa40/zgc:163061	15
GO:0000460	GO:0000460	maturation of 5.8S rRNA	13/4227	22/17036	0.000642559	0.0363236	0.0340725	exosc9/exosc3/urb1/gnl2/exosc7/bop1/ftsj3/exosc10/rrs1/las1l/exosc2/wdr12/abt1	13
GO:0000470	GO:0000470	maturation of LSU-rRNA	13/4227	22/17036	0.000642559	0.0363236	0.0340725	snu13b/urb1/gnl2/bop1/rpf2/rpl7l1/nhp2/ftsj3/znhit6/znhit3/las1l/wdr12/ddx18	13
GO:0000910	GO:0000910	cytokinesis	35/4227	85/17036	0.000651493	0.0363236	0.0340725	map9/sept3/apc/ect2/becn1/zfyve26/fbxo5/si:ch1073-266p11.2/aurkb/sept6/sept8b/snx9a/kif23/jtb/cdc14aa/plk3/efhc1/rtkn2b/unc119b/zgc:162239/snx33/sept15/sept12/sept9a/rab11fip4a/e2f7/rab11fip4b/aurka/si:dkey-187j14.4/zgc:172065/e2f8/cdt1/cdc14b/ikbkb/sept5a	35
GO:0061371	GO:0061371	determination of heart left/right asymmetry	64/4227	179/17036	0.000676627	0.0370745	0.0347769	dnah6/lmo7b/pkd2/apc/ptpn11a/rargb/trib3/foxh1/ep300a/foxj1b/armc4/camk2g1/meis1b/fgfr2/sept6/pdlim7/nek8/enpp2/gdf3/wtip/pak1/cfap20/snx10a/gmnn/rbm24a/chd7/prrx1a/lrrc6/scn12aa/meis2b/dnai1.1/dub/slc8a4a/lpar3/ncl/ubxn10/dnah5l/ndrg4/mical2b/cald1b/glis2b/ttc25/smarca4a/adap2/ccdc103/foxj1a/gpr22a/pkp2/atp6v1f/cacna1c/tbx1/foxn4/rangrf/tbx3a/dzip1/ccdc151/bmpr2a/catip/ccdc40/ntn1a/rp2/dnaaf1/at…	64
GO:0043414	GO:0043414	macromolecule methylation	50/4227	133/17036	0.000701074	0.0377629	0.0354227	eed/zc3h13/prmt9/setd4/apc/nsun5/mettl1/setmar/lcmt1/trmt5/si:dkey-85a20.4/trmt12/mettl16/alkbh8/fbl/trmt61b/smyd2a/dnmt3ab/ehmt2/setdb1a/jarid2b/nsun2/nsun4/tyw3/tgs1/mettl13/trmt6/pou5f3/wdr5/ftsj3/prdm5/dnmt3bb.2/dnmt3bb.1/cmtr1/prdm14/prmt6/carm1/dnmt1/ehmt1a/ntmt1/hemk1/mettl3/cmtr2/trmt44/phf19/suv39h1b/setd1bb/prmt2/wdr4/lcmt2	50
GO:0006813	GO:0006813	potassium ion transport	63/4227	176/17036	0.000716657	0.0379589	0.0356065	atp1a1a.5/pkd2/wnk2/kcns3a/kcnk1b/kcnh5b/vip/atp1b3b/si:ch211-261a10.5/kcnj13/kcnj14/kcnn4/si:dkey-201i6.2/zgc:162160/kcnk10b/kcnh1a/hcn4/slc12a1/neto2b/kcng4a/kcnk6/kcnj1a.6/kcnj1a.5/kcnj1a.1/kcnj5/hcn3/slc9a3.1/atp1b3a/slc12a7a/kcnn1a/si:rp71-39b20.4/kcnb2/kcnq3/kcnab1b/kcnk2b/kcnk5b/kcns3b/kcnf1a/tmem38b/kcnt1/kcnh1b/atp1b2a/si:dkey-192j17.1/kcnj11l/kcna1a/hcn4l/kcnh6a/kcnc3a/kcnc2/wnk1b/kcnd2…	63
GO:0090407	GO:0090407	organophosphate biosynthetic process	112/4227	345/17036	0.000742783	0.0386978	0.0362996	gart/atic/dctd/si:dkey-37g12.1/pgam1b/pi4k2a/slc27a1b/pigo/zgc:77375/tamm41/pik3c2b/pfklb/ipmkb/plcd3b/nme2a/pank2/ckba/elovl6l/cox5b2/nme5/gucy2f/adcy3a/adcy2a/fdps/gapdh/mboat7/pigv/gapdhs/ptdss1a/crls1/eno4/acss1/si:ch211-132f19.7/cmpk2/gpib/pkma/si:ch211-260p9.3/pik3c2a/si:dkey-145c18.3/si:dkey-145c18.2/gmps/adcy2b/lpcat1/ptdss1b/rrm2/uck2b/prtfdc1/elovl1a/plcd1b/pld1a/pfkpb/adcy1a/ckbb/paics…	112
GO:0001510	GO:0001510	RNA methylation	22/4227	47/17036	0.000859233	0.0440426	0.0413132	zc3h13/nsun5/mettl1/trmt5/si:dkey-85a20.4/trmt12/mettl16/alkbh8/fbl/trmt61b/nsun2/nsun4/tyw3/tgs1/trmt6/ftsj3/cmtr1/mettl3/cmtr2/trmt44/wdr4/lcmt2	22
GO:0030036	GO:0030036	actin cytoskeleton organization	151/4227	487/17036	0.000997161	0.0503012	0.047184	fscn1b/dmd/tmod1/cnn1a/si:ch211-176g13.8/myo18aa/dbnla/mef2ca/ect2/slc8a1a/flnb/rac3b/rac1a/baiap2l1a/mlst8/cdc42ep1a/ablim2/rhoq/llgl2/cdc42ep4b/fmn2b/pdlim1/plek2/cfl1l/sorbs2b/diaph2/pdlim7/zgc:158689/bves/tmod4/phactr4b/spire1b/ptk2ba/cdc42bpaa/cfl2/si:ch211-195o20.7/sptbn5/si:ch211-175f11.5/evla/smyd2a/prox1a/sptb/asb2b/iqsec3b/kif23/vaspb/ehd2b/fhod3a/tpm3/spire1a/elmo1/thsd7aa/ppp1r9a/wasf…	151
GO:0006486	GO:0006486	protein glycosylation	65/4227	185/17036	0.00104168	0.0509302	0.047774	mogs/st8sia4/b3galt6/st3gal8/st6galnac1.2/galnt2/b3gat2/st3gal5/fut11/mgat4b/syvn1/zgc:92907/fkrp/mgat1a/pomgnt2/galnt1/alg2/ext1a/b3gnt2b/fut8a/alk/serp1/st3gal2/st8sia2/b3gat1a/st3gal4/si:ch1073-440p11.2/st3gal1/ext1b/extl2/st3gal3b/uggt1/alg3/nus1/st6galnac6/st8sia5/sdf2/st6gal1/alg13/mgat5/zgc:194551/b3gnt7/gmppb/zgc:101663/galnt6/galnt8a.2/galnt8a.1/galnt18a/st8sia6/mgat3a/alg1/galnt8b.1/gal…	65
GO:0043413	GO:0043413	macromolecule glycosylation	65/4227	185/17036	0.00104168	0.0509302	0.047774	mogs/st8sia4/b3galt6/st3gal8/st6galnac1.2/galnt2/b3gat2/st3gal5/fut11/mgat4b/syvn1/zgc:92907/fkrp/mgat1a/pomgnt2/galnt1/alg2/ext1a/b3gnt2b/fut8a/alk/serp1/st3gal2/st8sia2/b3gat1a/st3gal4/si:ch1073-440p11.2/st3gal1/ext1b/extl2/st3gal3b/uggt1/alg3/nus1/st6galnac6/st8sia5/sdf2/st6gal1/alg13/mgat5/zgc:194551/b3gnt7/gmppb/zgc:101663/galnt6/galnt8a.2/galnt8a.1/galnt18a/st8sia6/mgat3a/alg1/galnt8b.1/gal…	65
GO:0044458	GO:0044458	motile cilium assembly	8/4227	11/17036	0.00112155	0.0540037	0.0506569	llgl2/ahi1/lrrc6/dnaaf3/rsph9/dnaaf1/spata6/si:ch211-163l21.10	8
GO:0001947	GO:0001947	heart looping	48/4227	129/17036	0.00114665	0.0540037	0.0506569	lmo7b/pkd2/apc/trib3/foxh1/ep300a/foxj1b/meis1b/pdlim7/nek8/gdf3/wtip/pak1/cfap20/snx10a/rbm24a/chd7/prrx1a/lrrc6/scn12aa/meis2b/dub/slc8a4a/ncl/ndrg4/mical2b/cald1b/glis2b/smarca4a/adap2/ccdc103/foxj1a/gpr22a/pkp2/atp6v1f/cacna1c/tbx1/foxn4/rangrf/tbx3a/dzip1/bmpr2a/ccdc40/ntn1a/rp2/dnaaf1/atp2a2a/dhrs9	48
GO:0046112	GO:0046112	nucleobase biosynthetic process	11/4227	18/17036	0.00115552	0.0540037	0.0506569	gart/mthfd1b/prtfdc1/ppat/mthfd1l/cad/shmt1/aprt/dhodh/umps/cps1	11
GO:0006342	GO:0006342	chromatin silencing	21/4227	45/17036	0.00117475	0.0541066	0.0507535	eed/rrp8/setdb1a/bmi1b/mbd3a/mbd3b/si:dkey-108k21.10/si:dkey-108k21.21/zgc:153405/si:ch211-113a14.24/histh1l/fam172a/h1m/si:dkey-23a13.9/si:dkey-23a13.17/si:ch73-368j24.11/si:ch73-368j24.12/si:ch1073-153i20.4/zgc:110425/naa40/zgc:163061	21
GO:0030198	GO:0030198	extracellular matrix organization	50/4227	136/17036	0.00124498	0.0565221	0.0530193	col17a1a/col5a3b/fbn2a/mmp13a/col1a1b/plce1/loxl3b/col17a1b/loxl3a/efemp2a/otol1b/mmp28/fkrp/postnb/kirrel3l/has3/mmp23bb/col11a2/col8a2/ddr2b/col15a1b/hmcn1/col5a1/mmp11b/ecm2/col9a3/si:dkey-32e6.6/lamb2/itga5/sulf1/fbln1/mmp15a/lamb4/col5a3a/kank2/si:dkey-14d8.6/si:dkey-61l1.4/myh9a/col5a2b/p4htm/mmp24/vangl2/ntn4/b3gat3/col4a6/col4a5/si:dkey-6n6.1/plod1a/col5a2a/col28a2a	50
GO:0098662	GO:0098662	inorganic cation transmembrane transport	118/4227	372/17036	0.00140567	0.0629186	0.0590194	atp1a1a.5/slc24a2/fam155a/si:dkey-28b4.8/pkd2/hvcn1/trpc4a/ryr1a/rem1/wnk2/park7/scn4aa/letm1/kcns3a/kcnk1b/kcnh5b/cox5b2/atp1b3b/si:ch211-261a10.5/scn3b/stim1a/trpc2a/kcnj13/kcnj14/si:ch211-254p10.2/kcnn4/si:dkey-201i6.2/atp2c1/scn1ba/zgc:162160/fxyd1/kcnk10b/kcnh1a/hcn4/slc12a1/slc30a4/nnt2/neto2b/si:ch211-260p9.3/kcng4a/itpr2/bcl2l10/trpc6b/kcnk6/kcnj1a.6/kcnj1a.5/kcnj1a.1/kcnj5/scn1bb/trpn1/c…	118
GO:0003006	GO:0003006	developmental process involved in reproduction	39/4227	101/17036	0.00145141	0.0640638	0.0600936	zp3c/nanos3/smad2/zfyve26/psme4a/si:ch211-67f13.7/nme5/dnd1/gdf9/hormad1/paqr7b/zp3d.2/zp3d.1/zgc:173556/zp3/zp3.2/iqcg/cyp19a1a/spaca4l/zp3b/buc/mei4/zar1/zp3a.2/zp3a.1/gsdf/amh/wwtr1/hnrnpa1b/abhd2b/sycp3/pde3a/anxa1a/ccnb1/anxa1b/mettl3/bmp15/piwil1/hnrnpa3	39
GO:0035803	GO:0035803	egg coat formation	10/4227	16/17036	0.00153701	0.0655449	0.061483	zp3c/si:ch211-67f13.7/zp3d.2/zp3d.1/zgc:173556/zp3/zp3.2/zp3b/zp3a.2/zp3a.1	10
GO:0021602	GO:0021602	cranial nerve morphogenesis	12/4227	21/17036	0.00156147	0.0655449	0.061483	six3b/rest/mdga2a/homer2/dlx5a/chd7/cad/slit1b/tuba1a/st8sia6/smarca4a/chn1	12
GO:2000243	GO:2000243	positive regulation of reproductive process	12/4227	21/17036	0.00156147	0.0655449	0.061483	zp3c/smad2/si:ch211-67f13.7/vip/zp3d.2/zp3d.1/zgc:173556/zp3b/zar1/zp3a.2/zp3a.1/pde3a	12
GO:0070085	GO:0070085	glycosylation	68/4227	198/17036	0.00159994	0.0655449	0.061483	mogs/st8sia4/b3galt6/st3gal8/st6galnac1.2/galnt2/b3gat2/st3gal5/fut11/mgat4b/syvn1/zgc:92907/fkrp/mgat1a/pomgnt2/galnt1/alg2/ext1a/b3gnt2b/fut8a/alk/serp1/st3gal2/st8sia2/b3gat1a/st3gal4/si:ch1073-440p11.2/st3gal1/ext1b/extl2/st3gal3b/uggt1/alg3/nus1/st6galnac6/st8sia5/sdf2/st6gal1/alg13/mgat5/zgc:194551/b3gnt7/gmppb/zgc:101663/galnt6/galnt8a.2/galnt8a.1/galnt18a/st8sia6/mgat3a/alg1/galnt8b.1/gal…	68
GO:0032465	GO:0032465	regulation of cytokinesis	15/4227	29/17036	0.00162934	0.0655449	0.061483	map9/ect2/becn1/zfyve26/si:ch1073-266p11.2/aurkb/cdc14aa/plk3/rab11fip4a/e2f7/rab11fip4b/aurka/e2f8/cdc14b/ikbkb	15
GO:0045910	GO:0045910	negative regulation of DNA recombination	15/4227	29/17036	0.00162934	0.0655449	0.061483	terf2ip/si:dkey-108k21.10/si:dkey-108k21.21/zgc:153405/si:ch211-113a14.24/helb/histh1l/h1m/si:dkey-23a13.9/si:dkey-23a13.17/si:ch73-368j24.11/si:ch73-368j24.12/si:ch1073-153i20.4/zgc:110425/zgc:163061	15
GO:1905268	GO:1905268	negative regulation of chromatin organization	15/4227	29/17036	0.00162934	0.0655449	0.061483	jarid2b/prmt6/si:dkey-108k21.10/si:dkey-108k21.21/zgc:153405/si:ch211-113a14.24/histh1l/h1m/si:dkey-23a13.9/si:dkey-23a13.17/si:ch73-368j24.11/si:ch73-368j24.12/si:ch1073-153i20.4/zgc:110425/zgc:163061	15
GO:0045814	GO:0045814	negative regulation of gene expression, epigenetic	21/4227	46/17036	0.0016615	0.0660032	0.0619128	eed/rrp8/setdb1a/bmi1b/mbd3a/mbd3b/si:dkey-108k21.10/si:dkey-108k21.21/zgc:153405/si:ch211-113a14.24/histh1l/fam172a/h1m/si:dkey-23a13.9/si:dkey-23a13.17/si:ch73-368j24.11/si:ch73-368j24.12/si:ch1073-153i20.4/zgc:110425/naa40/zgc:163061	21
GO:0009101	GO:0009101	glycoprotein biosynthetic process	79/4227	237/17036	0.00186325	0.0731038	0.0685734	si:dkey-26i13.5/chst12b/mogs/st8sia4/b3galt6/st3gal8/cant1b/st6galnac1.2/chst3b/galnt2/b3gat2/chst3a/hs3st1/st3gal5/fut11/mgat4b/syvn1/zgc:92907/fkrp/mgat1a/itm2ca/pomgnt2/galnt1/alg2/ext1a/b3gnt2b/fut8a/alk/serp1/st3gal2/st8sia2/b3gat1a/st3gal4/si:ch1073-440p11.2/st3gal1/ext1b/extl2/st3gal3b/uggt1/alg3/itm2cb/nus1/st6galnac6/st8sia5/sdf2/st6gal1/alg13/mgat5/zgc:194551/b3gnt7/gmppb/zgc:101663/gal…	79
GO:0046390	GO:0046390	ribose phosphate biosynthetic process	60/4227	173/17036	0.00224539	0.0870225	0.0816295	gart/atic/si:dkey-37g12.1/pgam1b/pfklb/nme2a/pank2/elovl6l/cox5b2/nme5/gucy2f/adcy3a/adcy2a/gapdh/gapdhs/eno4/acss1/si:ch211-132f19.7/gpib/pkma/gmps/adcy2b/uck2b/prtfdc1/elovl1a/pfkpb/adcy1a/paics/ppat/cad/si:dkey-206f10.1/uck1/pgam2/adssl/ampd2a/uckl1b/pfkma/elovl4b/eno3/pfkpa/coasy/dcakd/pkmb/prps1a/pdha1a/ak1/scn1lab/ak4/pfkmb/adcy7/aprt/dhodh/elovl7a/uck2a/impdh2/umps/adcy5/nme8/pfkla/elovl7b	60
GO:0009260	GO:0009260	ribonucleotide biosynthetic process	59/4227	170/17036	0.00238644	0.0913748	0.0857121	gart/atic/si:dkey-37g12.1/pgam1b/pfklb/nme2a/pank2/elovl6l/cox5b2/nme5/gucy2f/adcy3a/adcy2a/gapdh/gapdhs/eno4/acss1/si:ch211-132f19.7/gpib/pkma/gmps/adcy2b/uck2b/prtfdc1/elovl1a/pfkpb/adcy1a/paics/ppat/cad/si:dkey-206f10.1/uck1/pgam2/adssl/ampd2a/uckl1b/pfkma/elovl4b/eno3/pfkpa/coasy/dcakd/pkmb/pdha1a/ak1/scn1lab/ak4/pfkmb/adcy7/aprt/dhodh/elovl7a/uck2a/impdh2/umps/adcy5/nme8/pfkla/elovl7b	59
GO:0043628	GO:0043628	ncRNA 3'-end processing	15/4227	30/17036	0.00251762	0.0929286	0.0871696	ptcd1/exosc9/ints2/ints5/exosc3/fbl/exosc7/exosc4/ints7/dkc1/exosc10/elac2/polr3k/exosc2/ints6	15
GO:0009165	GO:0009165	nucleotide biosynthetic process	72/4227	215/17036	0.00251873	0.0929286	0.0871696	gart/atic/dctd/si:dkey-37g12.1/pgam1b/tamm41/pfklb/nme2a/pank2/elovl6l/cox5b2/nme5/gucy2f/adcy3a/adcy2a/gapdh/gapdhs/eno4/acss1/si:ch211-132f19.7/cmpk2/gpib/pkma/si:dkey-145c18.3/si:dkey-145c18.2/gmps/adcy2b/rrm2/uck2b/prtfdc1/elovl1a/pfkpb/adcy1a/paics/ppat/cad/si:dkey-206f10.1/uck1/pgam2/nadk2/adssl/rrm1/ampd2a/uckl1b/pfkma/nmnat1/elovl4b/eno3/pfkpa/coasy/dcakd/pkmb/nos1/prps1a/pdha1a/nos2a/ak1…	72
GO:0072522	GO:0072522	purine-containing compound biosynthetic process	60/4227	174/17036	0.00261169	0.0929286	0.0871696	gart/atic/si:dkey-37g12.1/pgam1b/pfklb/nme2a/adkb/pank2/elovl6l/adka/cox5b2/nme5/gucy2f/adcy3a/adcy2a/gapdh/gapdhs/eno4/acss1/si:ch211-132f19.7/mthfd1b/gpib/pkma/gmps/adcy2b/prtfdc1/elovl1a/pfkpb/adcy1a/paics/ppat/mthfd1l/si:dkey-206f10.1/pgam2/adssl/ampd2a/pfkma/elovl4b/eno3/pfkpa/coasy/dcakd/pkmb/shmt1/nos1/prps1a/pdha1a/nos2a/ak1/scn1lab/ak4/pfkmb/adcy7/aprt/elovl7a/impdh2/adcy5/nme8/pfkla/elo…	60
GO:0030705	GO:0030705	cytoskeleton-dependent intracellular transport	30/4227	75/17036	0.00261936	0.0929286	0.0871696	ift46/map6a/kif17/ndel1a/cep131/wdr35/fmr1/ccdc88b/si:ch211-235e9.8/dync2h1/ccdc88c/kif23/kif1ab/ift57/hook1/ift172/kif13bb/wdr34/tmem201/lca5/mak/hook2/mapk8ip3/rhot1a/flr/ndel1b/ccdc88aa/ttc26/kif5ab/ift81	30
GO:0006734	GO:0006734	NADH metabolic process	8/4227	12/17036	0.00263171	0.0929286	0.0871696	mdh1b/pfklb/pfkpb/gpd1b/pfkma/pfkpa/pfkmb/nudt12	8
GO:0060046	GO:0060046	regulation of acrosome reaction	8/4227	12/17036	0.00263171	0.0929286	0.0871696	zp3c/si:ch211-67f13.7/zp3d.2/zp3d.1/zgc:173556/zp3b/zp3a.2/zp3a.1	8
GO:2000344	GO:2000344	positive regulation of acrosome reaction	8/4227	12/17036	0.00263171	0.0929286	0.0871696	zp3c/si:ch211-67f13.7/zp3d.2/zp3d.1/zgc:173556/zp3b/zp3a.2/zp3a.1	8
GO:0045765	GO:0045765	regulation of angiogenesis	35/4227	91/17036	0.00267342	0.0931525	0.0873796	syk/ptenb/jcada/thbs2b/ism1/thbs2a/tnmd/sirt2/bmper/enpp2/ptk2ba/ptena/prkd1/utp15/elmo1/scg2b/arhgap18/kdr/thbs1b/sox11b/adgrg6/serpinf1/birc5b/itgb1a/nrp1a/tmem184a/vegfab/tek/anxa1a/anxa1b/ntn1a/ptger3/vhl/prok2/thbs1a	35
GO:0098660	GO:0098660	inorganic ion transmembrane transport	124/4227	400/17036	0.00269667	0.0931525	0.0873796	atp1a1a.5/slc24a2/fam155a/si:dkey-28b4.8/pkd2/hvcn1/trpc4a/ryr1a/rem1/wnk2/park7/scn4aa/letm1/kcns3a/kcnk1b/kcnh5b/cox5b2/atp1b3b/si:ch211-261a10.5/scn3b/stim1a/trpc2a/kcnj13/kcnj14/si:ch211-254p10.2/kcnn4/si:dkey-201i6.2/atp2c1/scn1ba/zgc:162160/fxyd1/kcnk10b/kcnh1a/hcn4/slc12a1/slc30a4/nnt2/neto2b/si:ch211-260p9.3/kcng4a/itpr2/bcl2l10/trpc6b/kcnk6/kcnj1a.6/kcnj1a.5/kcnj1a.1/kcnj5/scn1bb/trpn1/c…	124
GO:1901342	GO:1901342	regulation of vasculature development	38/4227	101/17036	0.00284247	0.0971331	0.0911136	syk/ptenb/jcada/thbs2b/ism1/thbs2a/tnmd/sirt2/bmper/enpp2/ptk2ba/ptena/prkd1/utp15/elmo1/scg2b/arhgap18/kdr/thbs1b/sox11b/adgrg6/serpinf1/stab1/birc5b/hoxc9a/itgb1a/nrp1a/arntl1a/tmem184a/vegfab/tek/anxa1a/anxa1b/ntn1a/ptger3/vhl/prok2/thbs1a	38
GO:0048562	GO:0048562	embryonic organ morphogenesis	126/4227	408/17036	0.00290197	0.0971959	0.0911724	lmo7b/pkd2/apc/tdgf1/ptpn11a/auts2a/rap1ab/trib3/ece1/chd5/sox9a/foxh1/ep300a/foxj1b/six3b/camk2g1/nolc1/meis1b/loxl3b/znf503/emx2/polr1c/pax2a/dcdc2b/jag1b/runx3/lbh/msx1a/polr1a/sparc/pitx2/pdlim7/nek8/sox4b/bmper/macc1/itga8/phactr4b/gdf3/wdr43/meis2a/wtip/pak1/sema3d/gas8/slc44a4/cfap20/snx10a/hoxa4a/hoxa3a/rit1/dlx5a/tinagl1/rbm24a/wls/chd7/pkn2/prrx1a/lrrc6/scn12aa/mmachc/meis2b/ahsa1a/sox1…	126
GO:0060287	GO:0060287	epithelial cilium movement involved in determination of left/right asymmetry	10/4227	17/17036	0.00290548	0.0971959	0.0911724	dnah6/rfx3/dnah9/cep131/dnaaf4/ccdc39/cfap53/ippk/ccdc40/gle1	10
GO:0022414	GO:0022414	reproductive process	84/4227	259/17036	0.00326297	0.107122	0.100483	ncapd3/zp3c/tsga10/nanos3/tdgf1/smad2/park7/ca15b/meiob/ercc4/eme1/zfyve26/psme4a/si:ch211-67f13.7/fbxo5/vip/rgs14a/nme5/dnd1/gdf9/tex11/diaph2/zgc:195212/msh5/hormad1/paqr7b/zp3d.2/zp3d.1/fbxo43/zgc:173556/zp3/zp3.2/msh4/iqcg/cyp19a1a/trpc6b/pdik1l/top2b/spaca4l/rad21b/zp3b/hfm1/buc/mei4/zar1/zp3a.2/zp3a.1/gsdf/stx2a/trpc2b/sass6/amh/wwtr1/birc5b/si:ch211-225h24.2/hnrnpa1b/rec8b/nanog/abhd2b/syc…	84
GO:0034340	GO:0034340	response to type I interferon	7/4227	10/17036	0.00333701	0.107122	0.100483	stat1a/pias4a/cav1/stat2/mettl3/stat1b/ddx58	7
GO:0060337	GO:0060337	type I interferon signaling pathway	7/4227	10/17036	0.00333701	0.107122	0.100483	stat1a/pias4a/cav1/stat2/mettl3/stat1b/ddx58	7
GO:0071357	GO:0071357	cellular response to type I interferon	7/4227	10/17036	0.00333701	0.107122	0.100483	stat1a/pias4a/cav1/stat2/mettl3/stat1b/ddx58	7
GO:0098655	GO:0098655	cation transmembrane transport	127/4227	414/17036	0.00361486	0.11488	0.107761	atp1a1a.5/slc24a2/fam155a/si:dkey-28b4.8/p2rx3b/pkd2/hvcn1/trpc4a/ryr1a/rem1/wnk2/park7/scn4aa/letm1/kcns3a/kcnk1b/kcnh5b/rhd/cox5b2/atp1b3b/si:ch211-261a10.5/scn3b/stim1a/trpc2a/kcnj13/kcnj14/si:ch211-254p10.2/kcnn4/rhbg/si:dkey-201i6.2/atp2c1/scn1ba/zgc:162160/fxyd1/kcnk10b/kcnh1a/hcn4/slc12a1/slc30a4/nnt2/neto2b/si:ch211-260p9.3/kcng4a/itpr2/bcl2l10/trpc6b/cngb1a/kcnk6/kcnj1a.6/kcnj1a.5/kcnj1a…	127
GO:1901293	GO:1901293	nucleoside phosphate biosynthetic process	72/4227	218/17036	0.00372664	0.11726	0.109993	gart/atic/dctd/si:dkey-37g12.1/pgam1b/tamm41/pfklb/nme2a/pank2/elovl6l/cox5b2/nme5/gucy2f/adcy3a/adcy2a/gapdh/gapdhs/eno4/acss1/si:ch211-132f19.7/cmpk2/gpib/pkma/si:dkey-145c18.3/si:dkey-145c18.2/gmps/adcy2b/rrm2/uck2b/prtfdc1/elovl1a/pfkpb/adcy1a/paics/ppat/cad/si:dkey-206f10.1/uck1/pgam2/nadk2/adssl/rrm1/ampd2a/uckl1b/pfkma/nmnat1/elovl4b/eno3/pfkpa/coasy/dcakd/pkmb/nos1/prps1a/pdha1a/nos2a/ak1…	72
GO:0042273	GO:0042273	ribosomal large subunit biogenesis	24/4227	58/17036	0.00403795	0.124901	0.117161	nle1/snu13b/urb1/gnl2/bop1/ebna1bp2/znf622/rpf2/rpl7l1/bxdc2/sdad1/nhp2/mrpl20/ftsj3/znhit6/rrs1/ppan/znhit3/las1l/surf6/wdr12/aamp/heatr3/ddx18	24
GO:0050708	GO:0050708	regulation of protein secretion	23/4227	55/17036	0.00412794	0.124901	0.117161	arfip1/rfx3/mtnr1bb/hmgb1a/tlr8b/tcf7l2/panx1a/hmgb1b/mtnr1ba/ica1/tnfrsf21/rfx6/tlr5b/tlr5a/nkx6.1/hmgn3/syt9b/scamp5a/anxa1a/anxa1b/lgr4/ano1/zgc:153759	23
GO:0009132	GO:0009132	nucleoside diphosphate metabolic process	22/4227	52/17036	0.00420107	0.124901	0.117161	pgam1b/pfklb/nme2a/nme5/gapdh/gapdhs/eno4/cmpk2/gpib/pkma/pfkpb/pgam2/pfkma/eno3/pfkpa/pkmb/ak1/scn1lab/ak4/pfkmb/nme8/pfkla	22
GO:0046031	GO:0046031	ADP metabolic process	18/4227	40/17036	0.00422538	0.124901	0.117161	pgam1b/pfklb/gapdh/gapdhs/eno4/gpib/pkma/pfkpb/pgam2/pfkma/eno3/pfkpa/pkmb/ak1/scn1lab/ak4/pfkmb/pfkla	18
GO:0043066	GO:0043066	negative regulation of apoptotic process	72/4227	219/17036	0.004228	0.124901	0.117161	tiprl/si:ch211-57m13.9/hyou1/si:ch211-122l14.7/si:ch1073-526c11.3/pimr46/heatr1/socs3b/pimr47/supv3l1/si:ch211-202m22.1/vip/aurkb/nme5/maea/pimr212/psenen/pimr209/pimr108/lgals3b/pimr175/pimr168/pimr60/pimr62/herpud1/si:ch211-160d20.5/bcl2l10/pimr179/mcl1a/pimr82/pimr141/pimr54/pimr49/pimr140/pimr50/pimr53/pimr65/pimr66/pimr67/pimr68/chd8/pimr130/pimr136/pimr131/pimr128/pimr129/pimr115/pimr113/pi…	72
GO:0006006	GO:0006006	glucose metabolic process	20/4227	46/17036	0.0042784	0.124901	0.117161	pfklb/dcxr/g6pc3/maea/gapdh/gapdhs/khk/gpib/arpp19a/pask/pfkpb/ppp1r3b/pcxa/fam3a/pfkma/pfkpa/zgc:153343/fam3c/pfkmb/pcxb	20
GO:0046939	GO:0046939	nucleotide phosphorylation	20/4227	46/17036	0.0042784	0.124901	0.117161	pgam1b/pfklb/nme2a/nme5/pnkp/gapdh/gapdhs/eno4/gpib/pkma/pfkpb/pgam2/pfkma/eno3/pfkpa/pkmb/scn1lab/pfkmb/nme8/pfkla	20
GO:0042127	GO:0042127	regulation of cell proliferation	87/4227	272/17036	0.00429008	0.124901	0.117161	ing2/lef1/apc/btg3/fgfr1b/ptenb/jcada/llgl2/fgfr3/fgfr2/vip/hbegfa/pdgfc/tnmd/sirt2/si:ch211-167j9.5/nf1a/csf3r/trim71/si:dkey-79d12.5/ptk2ab/ndrg1b/gdf6a/ptk2ba/ptena/smyd2a/id2a/alk/trpm7/dusp22a/tbrg1/pid1/ago3b/ndrg1a/dusp22b/tnk2b/ddr2b/mycb/ing5b/chd8/atraid/kdr/sh3rf1/tnfrsf21/btc/tgfb1b/rb1/hbegfb/btg2/fbn2b/matk/si:dkey-42i9.4/stat1a/nanog/dlec1/hhla2b.2/hhla2b.1/pax6a/tes/tob1a/emp2/e2f…	87
GO:0043902	GO:0043902	positive regulation of multi-organism process	12/4227	23/17036	0.00432319	0.124901	0.117161	zp3c/smad2/si:ch211-67f13.7/vip/zp3d.2/zp3d.1/zgc:173556/zp3b/zar1/zp3a.2/zp3a.1/pde3a	12
GO:0097435	GO:0097435	supramolecular fiber organization	132/4227	435/17036	0.00463329	0.132654	0.124433	fscn1b/dmd/tmod1/apc/katnal2/fbn2a/si:ch211-176g13.8/myo18aa/dbnla/mef2ca/slc8a1a/rac3b/baiap2l1a/cdc42ep1a/rhoq/ndel1a/cdc42ep4b/fmn2b/loxl3b/cfl1l/si:ch1073-266p11.2/loxl3a/sorbs2b/efemp2a/diaph2/ccdc88b/eml2/zgc:158689/bves/tmod4/stmn1b/spire1b/cfl2/si:ch211-175f11.5/evla/smyd2a/prox1a/sptb/ccdc88c/asb2b/cep126/vaspb/fhod3a/col11a2/tpm3/stmn1a/spire1a/ppp1r9a/cap1/rbm24a/ccdc13/abi1b/map1sb/my…	132
GO:0034765	GO:0034765	regulation of ion transmembrane transport	62/4227	185/17036	0.00469964	0.133352	0.125088	pkd2/hvcn1/rem1/wnk2/park7/scn4aa/kcns3a/kcnh5b/scn3b/stim1a/kcnj13/kcnj14/si:dkey-201i6.2/scn1ba/zgc:162160/fxyd1/kcnh1a/hcn4/neto2b/kcng4a/bcl2l10/kcnj1a.6/kcnj1a.5/kcnj1a.1/kcnj5/scn1bb/cacng7a/shisa7b/si:rp71-39b20.4/kcnb2/scn12aa/kcns3b/kcnf1a/cacna1sa/kcnh1b/pm20d1.2/si:dkey-192j17.1/kcnj11l/kcna1a/hcn4l/cacnb1/scn4ab/kcnh6a/kcnc3a/cacna1aa/cacna1ha/cacng1b/cacng4b/ano6/kcnc2/wnk1b/kcnd2/ca…	62
GO:0003143	GO:0003143	embryonic heart tube morphogenesis	50/4227	144/17036	0.00483124	0.134073	0.125765	lmo7b/pkd2/apc/ptpn11a/trib3/foxh1/ep300a/foxj1b/camk2g1/meis1b/pdlim7/nek8/gdf3/wtip/pak1/cfap20/snx10a/rbm24a/chd7/prrx1a/lrrc6/scn12aa/meis2b/dub/slc8a4a/ncl/ndrg4/mical2b/cald1b/glis2b/smarca4a/adap2/ccdc103/foxj1a/gpr22a/pkp2/atp6v1f/cacna1c/tbx1/foxn4/rangrf/tbx3a/dzip1/bmpr2a/ccdc40/ntn1a/rp2/dnaaf1/atp2a2a/dhrs9	50
GO:0060562	GO:0060562	epithelial tube morphogenesis	79/4227	245/17036	0.00499233	0.134073	0.125765	rasa3/lmo7b/pkd2/apc/tdgf1/ptpn11a/trib3/dvl1b/sox9a/foxh1/ep300a/foxj1b/camk2g1/meis1b/pax2a/nin/msx1a/klhl3/sparc/pcdh19/pdlim7/nek8/bmper/phactr4b/gdf3/wtip/pak1/pard6a/vaspb/cfap20/snx10a/pard6gb/rbm24a/chd7/prrx1a/lrrc6/scn12aa/meis2b/shroom3/dub/slc8a4a/ncl/ndrg4/mical2b/cald1b/irx3b/sox10/glis2b/smarca4a/adap2/ccdc103/foxj1a/sox9b/gpr22a/pkp2/atp6v1f/cacna1c/gata3/gdnfb/tbx1/foxn4/rangrf/t…	79
GO:0034762	GO:0034762	regulation of transmembrane transport	63/4227	189/17036	0.00504685	0.134073	0.125765	pkd2/hvcn1/rem1/wnk2/park7/scn4aa/kcns3a/kcnh5b/scn3b/stim1a/kcnj13/kcnj14/si:dkey-201i6.2/scn1ba/zgc:162160/fxyd1/kcnh1a/hcn4/neto2b/kcng4a/bcl2l10/pid1/kcnj1a.6/kcnj1a.5/kcnj1a.1/kcnj5/scn1bb/cacng7a/shisa7b/si:rp71-39b20.4/kcnb2/scn12aa/kcns3b/kcnf1a/cacna1sa/kcnh1b/pm20d1.2/si:dkey-192j17.1/kcnj11l/kcna1a/hcn4l/cacnb1/scn4ab/kcnh6a/kcnc3a/cacna1aa/cacna1ha/cacng1b/cacng4b/ano6/kcnc2/wnk1b/kcn…	63
GO:0007339	GO:0007339	binding of sperm to zona pellucida	10/4227	18/17036	0.00509292	0.134073	0.125765	zp3c/si:ch211-67f13.7/zp3d.2/zp3d.1/zgc:173556/zp3/zp3.2/zp3b/zp3a.2/zp3a.1	10
GO:0007340	GO:0007340	acrosome reaction	10/4227	18/17036	0.00509292	0.134073	0.125765	zp3c/si:ch211-67f13.7/zp3d.2/zp3d.1/zgc:173556/zp3b/zp3a.2/zp3a.1/stx2a/plcd4b	10
GO:0050777	GO:0050777	negative regulation of immune response	10/4227	18/17036	0.00509292	0.134073	0.125765	loxl3b/loxl3a/pias4a/socs1a/irak3/b2m/anxa1a/anxa1b/mettl3/serping1	10
GO:0050796	GO:0050796	regulation of insulin secretion	10/4227	18/17036	0.00509292	0.134073	0.125765	rfx3/mtnr1bb/tcf7l2/mtnr1ba/ica1/rfx6/nkx6.1/hmgn3/syt9b/ano1	10
GO:0000003	GO:0000003	reproduction	84/4227	263/17036	0.00515444	0.134073	0.125765	ncapd3/zp3c/tsga10/nanos3/tdgf1/smad2/park7/ca15b/meiob/ercc4/eme1/zfyve26/psme4a/si:ch211-67f13.7/fbxo5/vip/rgs14a/nme5/dnd1/gdf9/tex11/diaph2/zgc:195212/msh5/hormad1/paqr7b/zp3d.2/zp3d.1/fbxo43/zgc:173556/zp3/zp3.2/msh4/iqcg/cyp19a1a/trpc6b/pdik1l/top2b/spaca4l/rad21b/zp3b/hfm1/buc/mei4/zar1/zp3a.2/zp3a.1/gsdf/stx2a/trpc2b/sass6/amh/wwtr1/birc5b/si:ch211-225h24.2/hnrnpa1b/rec8b/nanog/abhd2b/syc…	84
GO:0061640	GO:0061640	cytoskeleton-dependent cytokinesis	24/4227	59/17036	0.00523092	0.134073	0.125765	map9/sept3/apc/ect2/zfyve26/fbxo5/aurkb/sept6/sept8b/snx9a/kif23/jtb/efhc1/rtkn2b/unc119b/zgc:162239/snx33/sept15/sept12/sept9a/si:dkey-187j14.4/zgc:172065/cdt1/sept5a	24
GO:0060548	GO:0060548	negative regulation of cell death	78/4227	242/17036	0.00531052	0.134073	0.125765	si:dkey-9i23.15/tiprl/ptpn11a/si:ch211-57m13.9/hyou1/si:ch211-122l14.7/park7/si:ch1073-526c11.3/pimr46/heatr1/socs3b/pimr47/supv3l1/si:ch211-202m22.1/vip/aurkb/nme5/maea/pimr212/psenen/pimr209/pimr108/lgals3b/pimr175/pimr168/pacrg/pimr60/pimr62/herpud1/si:ch211-160d20.5/bcl2l10/pimr179/mcl1a/pimr82/txndc12/pimr141/pimr54/pimr49/pimr140/pimr50/pimr53/pimr65/pimr66/pimr67/pimr68/chd8/pimr130/pimr13…	78
GO:0006171	GO:0006171	cAMP biosynthetic process	8/4227	13/17036	0.00535787	0.134073	0.125765	adcy3a/adcy2a/si:ch211-132f19.7/adcy2b/adcy1a/si:dkey-206f10.1/adcy7/adcy5	8
GO:0006560	GO:0006560	proline metabolic process	8/4227	13/17036	0.00535787	0.134073	0.125765	pycr1b/zgc:92040/aldh18a1/oat/noxred1/pycr3/prodhb/dao.2	8
GO:0045580	GO:0045580	regulation of T cell differentiation	8/4227	13/17036	0.00535787	0.134073	0.125765	loxl3b/loxl3a/ndrg1b/sh3rf1/gata3/anxa1a/anxa1b/mettl3	8
GO:0046058	GO:0046058	cAMP metabolic process	8/4227	13/17036	0.00535787	0.134073	0.125765	adcy3a/adcy2a/si:ch211-132f19.7/adcy2b/adcy1a/si:dkey-206f10.1/adcy7/adcy5	8
GO:0071025	GO:0071025	RNA surveillance	8/4227	13/17036	0.00535787	0.134073	0.125765	pcid2/exosc9/supv3l1/exosc3/exosc7/exosc4/exosc10/exosc2	8
GO:0043069	GO:0043069	negative regulation of programmed cell death	72/4227	221/17036	0.00540755	0.134259	0.125939	tiprl/si:ch211-57m13.9/hyou1/si:ch211-122l14.7/si:ch1073-526c11.3/pimr46/heatr1/socs3b/pimr47/supv3l1/si:ch211-202m22.1/vip/aurkb/nme5/maea/pimr212/psenen/pimr209/pimr108/lgals3b/pimr175/pimr168/pimr60/pimr62/herpud1/si:ch211-160d20.5/bcl2l10/pimr179/mcl1a/pimr82/pimr141/pimr54/pimr49/pimr140/pimr50/pimr53/pimr65/pimr66/pimr67/pimr68/chd8/pimr130/pimr136/pimr131/pimr128/pimr129/pimr115/pimr113/pi…	72
GO:0006164	GO:0006164	purine nucleotide biosynthetic process	55/4227	162/17036	0.00552298	0.136062	0.12763	gart/atic/si:dkey-37g12.1/pgam1b/pfklb/nme2a/pank2/elovl6l/cox5b2/nme5/gucy2f/adcy3a/adcy2a/gapdh/gapdhs/eno4/acss1/si:ch211-132f19.7/gpib/pkma/gmps/adcy2b/prtfdc1/elovl1a/pfkpb/adcy1a/paics/ppat/si:dkey-206f10.1/pgam2/adssl/ampd2a/pfkma/elovl4b/eno3/pfkpa/coasy/dcakd/pkmb/nos1/prps1a/pdha1a/nos2a/ak1/scn1lab/ak4/pfkmb/adcy7/aprt/elovl7a/impdh2/adcy5/nme8/pfkla/elovl7b	55
GO:0051302	GO:0051302	regulation of cell division	21/4227	50/17036	0.00564465	0.137642	0.129112	map9/ect2/becn1/zfyve26/si:ch1073-266p11.2/aurkb/kdf1a/gdf3/cdc14aa/plk3/tgfb1b/rbl2/rab11fip4a/e2f7/rab11fip4b/aurka/e2f8/fgf3/cdc14b/ikbkb/fgf17	21
GO:0009135	GO:0009135	purine nucleoside diphosphate metabolic process	18/4227	41/17036	0.00581041	0.137642	0.129112	pgam1b/pfklb/gapdh/gapdhs/eno4/gpib/pkma/pfkpb/pgam2/pfkma/eno3/pfkpa/pkmb/ak1/scn1lab/ak4/pfkmb/pfkla	18
GO:0009179	GO:0009179	purine ribonucleoside diphosphate metabolic process	18/4227	41/17036	0.00581041	0.137642	0.129112	pgam1b/pfklb/gapdh/gapdhs/eno4/gpib/pkma/pfkpb/pgam2/pfkma/eno3/pfkpa/pkmb/ak1/scn1lab/ak4/pfkmb/pfkla	18
GO:0009185	GO:0009185	ribonucleoside diphosphate metabolic process	18/4227	41/17036	0.00581041	0.137642	0.129112	pgam1b/pfklb/gapdh/gapdhs/eno4/gpib/pkma/pfkpb/pgam2/pfkma/eno3/pfkpa/pkmb/ak1/scn1lab/ak4/pfkmb/pfkla	18
GO:2000241	GO:2000241	regulation of reproductive process	18/4227	41/17036	0.00581041	0.137642	0.129112	zp3c/smad2/si:ch211-67f13.7/fbxo5/vip/hormad1/zp3d.2/zp3d.1/fbxo43/zgc:173556/zp3b/zar1/zp3a.2/zp3a.1/nanog/pde3a/mettl3/bmp15	18
GO:0022603	GO:0022603	regulation of anatomical structure morphogenesis	117/4227	383/17036	0.00584699	0.137642	0.129112	cdc42se2/syk/musk/dpysl2b/dbnla/mapk14b/qrich1/dvl1b/cdkl5/foxh1/ptenb/cdc42ep1a/jcada/rhoq/thbs2b/cdc42ep4b/osr1/ism1/thbs2a/fmr1/pitx2/tnmd/sirt2/bmper/bves/enpp2/sema6e/rspo3/gdf3/ptk2ba/si:ch211-266o15.1/ptena/prkd1/smyd2a/id2a/wtip/pak1/utp15/sema3d/cfap20/ncaldb/sema4ab/pard6gb/elmo1/zmym4/rbm24a/palmda/col15a1b/tnika/palm1b/scg2b/sema4e/klf2b/arhgap18/kdr/rhov/thbs1b/sox11b/adgrg6/notch1a/…	117
GO:1902275	GO:1902275	regulation of chromatin organization	24/4227	60/17036	0.00670202	0.154142	0.14459	meis3/ehmt2/setdb1a/jarid2b/hnrnpub/jdp2b/dnmt3bb.2/prmt6/si:dkey-108k21.10/si:dkey-108k21.21/zgc:153405/si:ch211-113a14.24/histh1l/h1m/tlk1b/si:dkey-23a13.9/si:dkey-23a13.17/si:ch73-368j24.11/si:ch73-368j24.12/si:ch1073-153i20.4/zgc:110425/naa40/zgc:163061/phf19	24
GO:0006635	GO:0006635	fatty acid beta-oxidation	12/4227	24/17036	0.0067152	0.154142	0.14459	tysnd1/acoxl/hadhab/acadl/acadm/echdc2/hadhaa/eci1/acox1/acox3/acaa2/cpt2	12
GO:0072330	GO:0072330	monocarboxylic acid biosynthetic process	42/4227	119/17036	0.00673256	0.154142	0.14459	lef1/pgam1b/tecrb/apc/park7/pfklb/elovl6l/scdb/gapdh/gapdhs/eno4/rcor1/gpib/pkma/asns/acot11a/tecrl2b/elovl1a/ptgs2a/rdh10b/pfkpb/pgam2/pfkma/elovl4b/eno3/pfkpa/fads2/abhd2b/pkmb/hsd17b12a/zgc:101540/anxa1a/anxa1b/gad1b/scn1lab/pfkmb/hsd17b12b/elovl7a/elovl8b/lipg/pfkla/elovl7b	42
GO:0051188	GO:0051188	cofactor biosynthetic process	54/4227	160/17036	0.00677424	0.154142	0.14459	pgam1b/mat2aa/pfklb/pank2/elovl6l/qdpra/hmbsb/mettl16/gapdh/gapdhs/eno4/acss1/coq6/mthfd1b/gpib/pkma/zgc:153031/si:dkey-145c18.3/si:dkey-145c18.2/iba57/elovl1a/pfkpb/mmachc/mthfd1l/pgam2/nadk2/gss/pfkma/nmnat1/elovl4b/eno3/pfkpa/tmem14ca/coasy/dcakd/pkmb/duox/si:ch73-141c7.1/slc25a39/coq5/pdha1a/coq4/alad/spra/scn1lab/pfkmb/mthfs/gclm/elovl7a/cpox/ido1/coq10b/pfkla/elovl7b	54
GO:0044283	GO:0044283	small molecule biosynthetic process	114/4227	374/17036	0.00693669	0.154142	0.14459	lef1/pgam1b/tecrb/apc/park7/pfklb/pycr1b/g6pc3/ipmkb/plcd3b/pgp/nme2a/aldh18a1/adkb/elovl6l/adka/scdb/nme5/maea/qdpra/gapdh/gapdhs/eno4/hmgcl/rcor1/coq6/noxred1/mthfd1b/gpib/pkma/si:ch211-260p9.3/zgc:153031/has3/gmps/arpp19a/cyp51/asns/uck2b/acot11a/prtfdc1/tecrl2b/glula/elovl1a/ptgs2a/plcd1b/rdh10b/pfkpb/nt5e/mmachc/enpp1/mthfd1l/itpkb/cad/nus1/pycr3/uck1/glulc/pgam2/itpkca/pcxa/ippk/uckl1b/fam3…	114
GO:0001522	GO:0001522	pseudouridine synthesis	9/4227	16/17036	0.0070589	0.154142	0.14459	rpusd4/rpusd2/pus1/nhp2/dkc1/pus3/pus7/trub2/nop10	9
GO:0007030	GO:0007030	Golgi organization	22/4227	54/17036	0.00717638	0.154142	0.14459	blzf1/pi4k2a/tmed2/si:dkey-27b3.2/myo18aa/tmed9/lman2/vmp1/atp8b2/sptbn5/plk3/tmed5/ubxn2a/lman1/atp8b3/plekhm2/cog7/atp8b4/tmed1a/lman2lb/tmed7/cog3	22
GO:0009113	GO:0009113	purine nucleobase biosynthetic process	7/4227	11/17036	0.00721407	0.154142	0.14459	gart/mthfd1b/prtfdc1/ppat/mthfd1l/shmt1/aprt	7
GO:0019320	GO:0019320	hexose catabolic process	7/4227	11/17036	0.00721407	0.154142	0.14459	pfklb/galk1/gale/pfkpb/pfkma/pfkpa/pfkmb	7
GO:0071027	GO:0071027	nuclear RNA surveillance	7/4227	11/17036	0.00721407	0.154142	0.14459	pcid2/exosc9/exosc3/exosc7/exosc4/exosc10/exosc2	7
GO:0071028	GO:0071028	nuclear mRNA surveillance	7/4227	11/17036	0.00721407	0.154142	0.14459	pcid2/exosc9/exosc3/exosc7/exosc4/exosc10/exosc2	7
GO:0008033	GO:0008033	tRNA processing	35/4227	96/17036	0.00721996	0.154142	0.14459	trmt10c/ptcd1/thumpd1/mettl1/tsen2/rpusd4/trmt2b/trmt5/si:dkey-85a20.4/thg1l/trmt12/alkbh8/pop1/trmt61b/dus3l/nsun2/elp2/tyw3/trmt6/pus1/pus3/dus2/elac2/dus1l/polr3k/qtrt1/dph3/elp4/mtfmt/ctu2/trmt44/ctu1/wdr4/lcmt2/adat3	35
GO:0034404	GO:0034404	nucleobase-containing small molecule biosynthetic process	35/4227	96/17036	0.00721996	0.154142	0.14459	pgam1b/pfklb/nme2a/adkb/adka/nme5/gapdh/gapdhs/eno4/gpib/pkma/gmps/uck2b/prtfdc1/pfkpb/nt5e/enpp1/cad/uck1/pgam2/uckl1b/pfkma/eno3/pfkpa/pkmb/cnp/scn1lab/pfkmb/dhodh/nudt12/uck2a/impdh2/umps/nme8/pfkla	35
GO:0030073	GO:0030073	insulin secretion	13/4227	27/17036	0.00722694	0.154142	0.14459	rfx3/mtnr1bb/park7/tcf7l2/mtnr1ba/ica1/rfx6/nkx6.1/hmgn3/syt9b/anxa1a/anxa1b/ano1	13
GO:0046883	GO:0046883	regulation of hormone secretion	14/4227	30/17036	0.00757545	0.160498	0.150552	rfx3/mtnr1bb/tcf7l2/vip/mtnr1ba/ica1/rfx6/nkx6.1/amh/hmgn3/syt9b/anxa1a/anxa1b/ano1	14
GO:0006165	GO:0006165	nucleoside diphosphate phosphorylation	19/4227	45/17036	0.00773473	0.161793	0.151766	pgam1b/pfklb/nme2a/nme5/gapdh/gapdhs/eno4/gpib/pkma/pfkpb/pgam2/pfkma/eno3/pfkpa/pkmb/scn1lab/pfkmb/nme8/pfkla	19
GO:1901659	GO:1901659	glycosyl compound biosynthetic process	18/4227	42/17036	0.00784755	0.161793	0.151766	nme2a/adkb/adka/nme5/trmt12/gmps/uck2b/tyw3/prtfdc1/cad/uck1/uckl1b/dhodh/uck2a/impdh2/umps/lcmt2/nme8	18
GO:0006096	GO:0006096	glycolytic process	16/4227	36/17036	0.00789108	0.161793	0.151766	pgam1b/pfklb/gapdh/gapdhs/eno4/gpib/pkma/pfkpb/pgam2/pfkma/eno3/pfkpa/pkmb/scn1lab/pfkmb/pfkla	16
GO:0006757	GO:0006757	ATP generation from ADP	16/4227	36/17036	0.00789108	0.161793	0.151766	pgam1b/pfklb/gapdh/gapdhs/eno4/gpib/pkma/pfkpb/pgam2/pfkma/eno3/pfkpa/pkmb/scn1lab/pfkmb/pfkla	16
GO:0031532	GO:0031532	actin cytoskeleton reorganization	16/4227	36/17036	0.00789108	0.161793	0.151766	rac3b/baiap2l1a/plek2/zgc:158689/ptk2ba/thsd7aa/phactr1/parvb/parvg/rac3a/baiap2a/baiap2l1b/anxa1a/anxa1b/parvab/zmp:0000001168	16
GO:0043062	GO:0043062	extracellular structure organization	51/4227	151/17036	0.00818967	0.166838	0.156499	col17a1a/col5a3b/fbn2a/mmp13a/col1a1b/plce1/loxl3b/col17a1b/loxl3a/efemp2a/otol1b/mmp28/fkrp/postnb/kirrel3l/has3/mmp23bb/col11a2/col8a2/ddr2b/col15a1b/hmcn1/col5a1/mmp11b/ecm2/col9a3/si:dkey-32e6.6/lamb2/itga5/sulf1/fbln1/mmp15a/lamb4/col5a3a/kank2/si:dkey-14d8.6/si:dkey-61l1.4/myh9a/col5a2b/p4htm/mmp24/vangl2/ntn4/b3gat3/col4a6/col4a5/si:dkey-6n6.1/lipg/plod1a/col5a2a/col28a2a	51
GO:0035036	GO:0035036	sperm-egg recognition	10/4227	19/17036	0.00838373	0.169704	0.159187	zp3c/si:ch211-67f13.7/zp3d.2/zp3d.1/zgc:173556/zp3/zp3.2/zp3b/zp3a.2/zp3a.1	10
GO:0051301	GO:0051301	cell division	70/4227	218/17036	0.00872011	0.175396	0.164526	ncapd3/map9/bora/sept3/apc/ska2/ect2/becn1/mcmbp/zfyve26/fbxo5/si:ch1073-266p11.2/aurkb/rgs14a/maea/sept6/sept8b/nek8/kdf1a/gdf3/snx9a/kif23/arpp19a/jtb/cdca8/cdc14aa/cdc20/ttc19/plk3/anapc4/katna1/efhc1/cdc40/zgc:86839/rtkn2b/tgfb1b/unc119b/zgc:162239/sass6/sde2/anapc10/snx33/sept15/rbl2/cdc27/sept12/sept9a/rab11fip4a/e2f7/chfr/cntrl/rab11fip4b/sdc4/aurka/si:dkey-187j14.4/zgc:172065/e2f8/fgf3/pi…	70
GO:0002791	GO:0002791	regulation of peptide secretion	23/4227	58/17036	0.00885578	0.177004	0.166035	arfip1/rfx3/mtnr1bb/hmgb1a/tlr8b/tcf7l2/panx1a/hmgb1b/mtnr1ba/ica1/tnfrsf21/rfx6/tlr5b/tlr5a/nkx6.1/hmgn3/syt9b/scamp5a/anxa1a/anxa1b/lgr4/ano1/zgc:153759	23
GO:0008285	GO:0008285	negative regulation of cell proliferation	30/4227	81/17036	0.00959144	0.19051	0.178704	ing2/apc/btg3/ptenb/llgl2/vip/tnmd/sirt2/si:dkey-79d12.5/ptena/smyd2a/tbrg1/ing5b/chd8/atraid/tnfrsf21/rb1/btg2/si:dkey-42i9.4/dlec1/hhla2b.2/hhla2b.1/tob1a/e2f7/btg1/cdkn1ba/si:ch73-361p23.3/si:cabz01029535.1/men1/zgc:153759	30
GO:0048382	GO:0048382	mesendoderm development	8/4227	14/17036	0.00980063	0.192262	0.180347	tdgf1/foxh1/osr1/pitx2/gdf3/eomesa/rasl11b/cdh1	8
GO:1905516	GO:1905516	positive regulation of fertilization	8/4227	14/17036	0.00980063	0.192262	0.180347	zp3c/si:ch211-67f13.7/zp3d.2/zp3d.1/zgc:173556/zp3b/zp3a.2/zp3a.1	8
GO:0009152	GO:0009152	purine ribonucleotide biosynthetic process	52/4227	156/17036	0.010118	0.19727	0.185045	gart/atic/si:dkey-37g12.1/pgam1b/pfklb/nme2a/pank2/elovl6l/cox5b2/nme5/gucy2f/adcy3a/adcy2a/gapdh/gapdhs/eno4/acss1/si:ch211-132f19.7/gpib/pkma/gmps/adcy2b/prtfdc1/elovl1a/pfkpb/adcy1a/paics/ppat/si:dkey-206f10.1/pgam2/adssl/ampd2a/pfkma/elovl4b/eno3/pfkpa/coasy/dcakd/pkmb/pdha1a/ak1/scn1lab/ak4/pfkmb/adcy7/aprt/elovl7a/impdh2/adcy5/nme8/pfkla/elovl7b	52
GO:0001508	GO:0001508	action potential	13/4227	28/17036	0.0104708	0.202243	0.18971	scn4aa/scn3b/scn1ba/scn1bb/prrx1a/scn12aa/rnf121/scn4ab/kcnh6a/cacna1ha/scn1lab/atp1b1a/slc4a3	13
GO:0009062	GO:0009062	fatty acid catabolic process	17/4227	40/17036	0.0106242	0.202243	0.18971	slc27a4/acads/tysnd1/acoxl/hadhab/acadl/acadm/echdc2/si:ch73-21k16.1/hadhaa/abhd2b/eci1/phyh/acox1/acox3/acaa2/cpt2	17
GO:0000018	GO:0000018	regulation of DNA recombination	16/4227	37/17036	0.0107549	0.202243	0.18971	ercc2/terf2ip/si:dkey-108k21.10/si:dkey-108k21.21/zgc:153405/si:ch211-113a14.24/helb/histh1l/h1m/si:dkey-23a13.9/si:dkey-23a13.17/si:ch73-368j24.11/si:ch73-368j24.12/si:ch1073-153i20.4/zgc:110425/zgc:163061	16
GO:0007338	GO:0007338	single fertilization	16/4227	37/17036	0.0107549	0.202243	0.18971	zp3c/park7/si:ch211-67f13.7/zp3d.2/zp3d.1/zgc:173556/zp3/zp3.2/trpc6b/zp3b/zp3a.2/zp3a.1/stx2a/trpc2b/bmb/plcd4b	16
GO:0042866	GO:0042866	pyruvate biosynthetic process	16/4227	37/17036	0.0107549	0.202243	0.18971	pgam1b/pfklb/gapdh/gapdhs/eno4/gpib/pkma/pfkpb/pgam2/pfkma/eno3/pfkpa/pkmb/scn1lab/pfkmb/pfkla	16
GO:0046879	GO:0046879	hormone secretion	16/4227	37/17036	0.0107549	0.202243	0.18971	rfx3/mtnr1bb/park7/tcf7l2/vip/mtnr1ba/ica1/slc44a4/rfx6/nkx6.1/amh/hmgn3/syt9b/anxa1a/anxa1b/ano1	16
GO:0015672	GO:0015672	monovalent inorganic cation transport	87/4227	281/17036	0.0109451	0.20461	0.191929	atp1a1a.5/pkd2/hvcn1/wnk2/park7/scn4aa/slc38a6/kcns3a/kcnk1b/kcnh5b/vip/cox5b2/klhl3/atp1b3b/si:ch211-261a10.5/scn3b/slc13a5b/kcnj13/kcnj14/kcnn4/si:dkey-201i6.2/scn1ba/zgc:162160/fxyd1/kcnk10b/kcnh1a/hcn4/slc12a1/nnt2/neto2b/kcng4a/kcnk6/kcnj1a.6/kcnj1a.5/kcnj1a.1/kcnj5/scn1bb/hcn3/slc9a3.1/atp1b3a/slc12a7a/kcnn1a/si:rp71-39b20.4/kcnb2/kcnq3/kcnab1b/scn12aa/kcnk2b/mfsd4b/kcnk5b/kcns3b/kcnf1a/tme…	87
GO:0000469	GO:0000469	cleavage involved in rRNA processing	9/4227	17/17036	0.0117315	0.21676	0.203327	exosc9/exosc3/gnl2/exosc7/nhp2/exosc10/rrs1/exosc2/abt1	9
GO:0018126	GO:0018126	protein hydroxylation	9/4227	17/17036	0.0117315	0.21676	0.203327	p4ha1a/p4ha1b/crtap/p4ha2/jmjd6/p4htm/ogfod1/unm_hu7910/plod1a	9
GO:0019318	GO:0019318	hexose metabolic process	26/4227	69/17036	0.0119376	0.219293	0.205703	man2b1/pfklb/dcxr/g6pc3/galk1/maea/gapdh/gapdhs/khk/gale/gpib/arpp19a/fuca1.1/pask/pfkpb/ppp1r3b/pcxa/pofut1/fam3a/pfkfb1/pfkma/pfkpa/zgc:153343/fam3c/pfkmb/pcxb	26
GO:0051223	GO:0051223	regulation of protein transport	29/4227	79/17036	0.0123011	0.223387	0.209543	arfip1/rfx3/mtnr1bb/hmgb1a/tlr8b/tcf7l2/cep131/sar1ab/si:ch211-210b2.2/panx1a/hmgb1b/mtnr1ba/ica1/si:dkey-206p8.1/anxa13l/tnfrsf21/rfx6/tlr5b/tlr5a/nkx6.1/hmgn3/syt9b/scamp5a/mief1/anxa1a/anxa1b/lgr4/ano1/zgc:153759	29
GO:0070201	GO:0070201	regulation of establishment of protein localization	29/4227	79/17036	0.0123011	0.223387	0.209543	arfip1/rfx3/mtnr1bb/hmgb1a/tlr8b/tcf7l2/cep131/sar1ab/si:ch211-210b2.2/panx1a/hmgb1b/mtnr1ba/ica1/si:dkey-206p8.1/anxa13l/tnfrsf21/rfx6/tlr5b/tlr5a/nkx6.1/hmgn3/syt9b/scamp5a/mief1/anxa1a/anxa1b/lgr4/ano1/zgc:153759	29
GO:0009124	GO:0009124	nucleoside monophosphate biosynthetic process	37/4227	106/17036	0.0127072	0.229452	0.215232	gart/atic/dctd/pgam1b/pfklb/cox5b2/gapdh/gapdhs/eno4/gpib/pkma/gmps/uck2b/prtfdc1/pfkpb/paics/ppat/uck1/pgam2/adssl/ampd2a/uckl1b/pfkma/eno3/pfkpa/pkmb/prps1a/ak1/scn1lab/ak4/pfkmb/aprt/dhodh/uck2a/impdh2/umps/pfkla	37
GO:0009988	GO:0009988	cell-cell recognition	10/4227	20/17036	0.0130868	0.234971	0.22041	zp3c/si:ch211-67f13.7/zp3d.2/zp3d.1/zgc:173556/zp3/zp3.2/zp3b/zp3a.2/zp3a.1	10
GO:0006400	GO:0006400	tRNA modification	24/4227	63/17036	0.013258	0.235384	0.220797	thumpd1/mettl1/trmt5/si:dkey-85a20.4/thg1l/trmt12/alkbh8/trmt61b/nsun2/elp2/tyw3/trmt6/pus1/pus3/qtrt1/dph3/elp4/mtfmt/ctu2/trmt44/ctu1/wdr4/lcmt2/adat3	24
GO:0046474	GO:0046474	glycerophospholipid biosynthetic process	24/4227	63/17036	0.013258	0.235384	0.220797	pi4k2a/slc27a1b/pigo/zgc:77375/tamm41/pik3c2b/pigv/ptdss1a/crls1/pik3c2a/ptdss1b/pld1a/pgap2/pigs/pik3cd/zgc:158659/mppe1/pign/pigm/cdipt/pigw/cept1a/piga/si:ch211-168k14.2	24
GO:0009156	GO:0009156	ribonucleoside monophosphate biosynthetic process	36/4227	103/17036	0.0135347	0.23799	0.223241	gart/atic/pgam1b/pfklb/cox5b2/gapdh/gapdhs/eno4/gpib/pkma/gmps/uck2b/prtfdc1/pfkpb/paics/ppat/uck1/pgam2/adssl/ampd2a/uckl1b/pfkma/eno3/pfkpa/pkmb/prps1a/ak1/scn1lab/ak4/pfkmb/aprt/dhodh/uck2a/impdh2/umps/pfkla	36
GO:0016074	GO:0016074	snoRNA metabolic process	7/4227	12/17036	0.0136294	0.23799	0.223241	exosc3/fbl/exosc4/dkc1/exosc10/zgc:103759/exosc2	7
GO:0061157	GO:0061157	mRNA destabilization	7/4227	12/17036	0.0136294	0.23799	0.223241	mettl16/zfp36l1a/pabpc1b/rbm24a/zfp36l1b/cth1/mettl3	7
GO:0022402	GO:0022402	cell cycle process	142/4227	486/17036	0.0139789	0.238241	0.223477	fbxl18/ncapd3/map9/bora/sept3/zdhhc8a/apc/ewsr1a/pmaip1/ccna1/prr11/ect2/psme2/dbf4b/becn1/meiob/ercc4/eme1/ndel1a/llgl2/cep131/meis1b/pdcd2/mcmbp/zfyve26/mad2l1bp/cdkn3/fbxo5/si:ch1073-266p11.2/aurkb/rgs14a/cetn4/cetn2/ccdc69/sept6/diaph2/zgc:195212/ccna2/sept8b/msh5/usp16/trim71/dscc1/hormad1/wnt4b/gnl2/ccne2/dbf4/nek10/fbxo43/snx9a/id2a/mapre3a/gpr132a/kiz/msh4/orc3/wtip/kif23/pard6a/cep126/mc…	142
GO:0043269	GO:0043269	regulation of ion transport	71/4227	226/17036	0.0141833	0.238241	0.223477	pkd2/hvcn1/rem1/wnk2/park7/scn4aa/kcns3a/kcnh5b/vip/scn3b/stim1a/kcnj13/kcnj14/si:dkey-201i6.2/scn1ba/zgc:162160/fxyd1/lgals3b/kcnh1a/hcn4/neto2b/kcng4a/bcl2l10/kcnj1a.6/kcnj1a.5/kcnj1a.1/kcnj5/scn1bb/cacng7a/shisa7b/si:rp71-39b20.4/kcnb2/scn12aa/kcns3b/kcnf1a/cldnb/cacna1sa/kcnh1b/nkain4/pm20d1.2/si:dkey-192j17.1/snx16/syt12/kcnj11l/syt9b/kcna1a/hcn4l/cacnb1/scn4ab/kcnh6a/kcnc3a/cacna1aa/cacna1h…	71
GO:0009566	GO:0009566	fertilization	16/4227	38/17036	0.0143782	0.238241	0.223477	zp3c/park7/si:ch211-67f13.7/zp3d.2/zp3d.1/zgc:173556/zp3/zp3.2/trpc6b/zp3b/zp3a.2/zp3a.1/stx2a/trpc2b/bmb/plcd4b	16
GO:0042073	GO:0042073	intraciliary transport	12/4227	26/17036	0.0144992	0.238241	0.223477	ift46/cep131/wdr35/dync2h1/ift57/ift172/wdr34/lca5/mak/flr/ttc26/ift81	12
GO:0009112	GO:0009112	nucleobase metabolic process	15/4227	35/17036	0.0146336	0.238241	0.223477	gart/xdh/aldh6a1/mthfd1b/uraha/prtfdc1/ppat/mthfd1l/cad/shmt1/gmpr2/aprt/dhodh/umps/cps1	15
GO:0030261	GO:0030261	chromosome condensation	15/4227	35/17036	0.0146336	0.238241	0.223477	ncapd3/top2b/si:dkey-108k21.10/si:dkey-108k21.21/zgc:153405/si:ch211-113a14.24/histh1l/h1m/si:dkey-23a13.9/si:dkey-23a13.17/si:ch73-368j24.11/si:ch73-368j24.12/si:ch1073-153i20.4/zgc:110425/zgc:163061	15
GO:0071697	GO:0071697	ectodermal placode morphogenesis	15/4227	35/17036	0.0146336	0.238241	0.223477	tdgf1/sox9a/foxh1/pax2a/msx1a/bmper/homer2/dlx5a/fzd8a/st8sia6/axin1/sox9b/gata3/tfap2c/fgf3	15
GO:0001841	GO:0001841	neural tube formation	13/4227	29/17036	0.014741	0.238241	0.223477	tdgf1/dvl1b/nin/pcdh19/phactr4b/pard6a/vaspb/pard6gb/shroom3/vangl2/mdka/cdh1/zic2a	13
GO:0031122	GO:0031122	cytoplasmic microtubule organization	13/4227	29/17036	0.014741	0.238241	0.223477	katnal2/si:ch1073-266p11.2/ccdc88b/ccdc88c/cep126/ccdc13/katna1/hook1/camsap2a/birc5b/nanog/hook2/ccdc88aa	13
GO:0009108	GO:0009108	coenzyme biosynthetic process	44/4227	131/17036	0.0147427	0.238241	0.223477	pgam1b/mat2aa/pfklb/pank2/elovl6l/qdpra/mettl16/gapdh/gapdhs/eno4/acss1/coq6/mthfd1b/gpib/pkma/zgc:153031/si:dkey-145c18.3/si:dkey-145c18.2/elovl1a/pfkpb/mthfd1l/pgam2/nadk2/pfkma/nmnat1/elovl4b/eno3/pfkpa/coasy/dcakd/pkmb/si:ch73-141c7.1/coq5/pdha1a/coq4/spra/scn1lab/pfkmb/mthfs/elovl7a/ido1/coq10b/pfkla/elovl7b	44
GO:0008283	GO:0008283	cell proliferation	114/4227	383/17036	0.0147611	0.238241	0.223477	abcb6a/melk/ing2/lef1/apc/ptpn11a/btg3/fgfr1b/ptenb/jcada/llgl2/fgfr3/ism1/fgfr2/vip/cetn4/irf2/hbegfa/pdgfc/tnmd/sirt2/si:ch211-167j9.5/nf1a/csf3r/trim71/si:dkey-79d12.5/ptk2ab/ndrg1b/gdf6a/ptk2ba/ptena/smyd2a/id2a/alk/trpm7/sema3d/dusp22a/tbrg1/pid1/ago3b/ndrg1a/csf3b/dusp22b/tnk2b/ddr2b/wls/mycb/ing5b/chd8/atraid/kdr/sh3rf1/tnfrsf21/btc/tgfb1b/rb1/hbegfb/btg2/fbn2b/matk/si:dkey-42i9.4/stat1a/p…	114
GO:0005977	GO:0005977	glycogen metabolic process	14/4227	32/17036	0.0147683	0.238241	0.223477	ugp2a/phka2/phkg2/pygl/khk/gyg1a/pask/ppp1r3b/pygma/phka1b/gyg1b/gys2/pygmb/zgc:77112	14
GO:0006073	GO:0006073	cellular glucan metabolic process	14/4227	32/17036	0.0147683	0.238241	0.223477	ugp2a/phka2/phkg2/pygl/khk/gyg1a/pask/ppp1r3b/pygma/phka1b/gyg1b/gys2/pygmb/zgc:77112	14
GO:0030072	GO:0030072	peptide hormone secretion	14/4227	32/17036	0.0147683	0.238241	0.223477	rfx3/mtnr1bb/park7/tcf7l2/vip/mtnr1ba/ica1/rfx6/nkx6.1/hmgn3/syt9b/anxa1a/anxa1b/ano1	14
GO:0044042	GO:0044042	glucan metabolic process	14/4227	32/17036	0.0147683	0.238241	0.223477	ugp2a/phka2/phkg2/pygl/khk/gyg1a/pask/ppp1r3b/pygma/phka1b/gyg1b/gys2/pygmb/zgc:77112	14
GO:0019359	GO:0019359	nicotinamide nucleotide biosynthetic process	21/4227	54/17036	0.0153819	0.245647	0.230423	pgam1b/pfklb/gapdh/gapdhs/eno4/gpib/pkma/si:dkey-145c18.3/si:dkey-145c18.2/pfkpb/pgam2/nadk2/pfkma/nmnat1/eno3/pfkpa/pkmb/scn1lab/pfkmb/ido1/pfkla	21
GO:0019363	GO:0019363	pyridine nucleotide biosynthetic process	21/4227	54/17036	0.0153819	0.245647	0.230423	pgam1b/pfklb/gapdh/gapdhs/eno4/gpib/pkma/si:dkey-145c18.3/si:dkey-145c18.2/pfkpb/pgam2/nadk2/pfkma/nmnat1/eno3/pfkpa/pkmb/scn1lab/pfkmb/ido1/pfkla	21
GO:0045017	GO:0045017	glycerolipid biosynthetic process	28/4227	77/17036	0.015735	0.250029	0.234535	pi4k2a/slc27a1b/pigo/dgat2/zgc:77375/tamm41/pik3c2b/pigv/ptdss1a/crls1/pik3c2a/ptdss1b/pld1a/si:ch73-21k16.1/pgap2/pigs/pik3cd/zgc:158659/mppe1/pign/pigm/cdipt/pigw/cnep1r1/ctdnep1b/cept1a/piga/si:ch211-168k14.2	28
GO:0003007	GO:0003007	heart morphogenesis	77/4227	249/17036	0.0163463	0.258451	0.242434	lmo7b/pkd2/apc/tdgf1/ptpn11a/mef2ca/trib3/foxh1/ep300a/foxj1b/camk2g1/meis1b/ids/pdlim7/nek8/cadm4/fbxo32/gdf3/cyp26c1/wtip/pak1/cfap20/snx10a/rbm24a/chd7/prrx1a/lrrc6/scn12aa/klf2b/meis2b/dpf3/adgrg6/myh6/dub/slc8a4a/nrg2a/fbn2b/ncl/wwtr1/csrp1a/ndrg4/mical2b/cald1b/glis2b/smarca4a/adap2/ccdc103/foxj1a/gpr22a/pkp2/mybpc1/atp6v1f/cacna1c/tbx1/foxn4/ltbp3/vcana/nr2f1a/rangrf/sebox/tbx3a/dzip1/tbx1…	77
GO:0032787	GO:0032787	monocarboxylic acid metabolic process	70/4227	224/17036	0.0167265	0.261232	0.245043	lef1/hadh/pgam1b/tecrb/apc/slc27a4/acads/park7/pfklb/acsf2/elovl6l/scdb/tysnd1/acoxl/gapdh/aldh5a1/gapdhs/cyp26c1/eno4/acss1/rcor1/hadhab/gpib/pkma/acadl/asns/acot11a/tecrl2b/elovl1a/ptgs2a/acadm/rdh10b/pfkpb/echdc2/si:ch73-21k16.1/hadhaa/pgam2/pcxa/pfkma/elovl4b/eno3/pfkpa/fads2/abhd2b/pkmb/hsd17b12a/zgc:101540/si:ch211-256m1.8/eci1/phyh/pparaa/acot15/pdha1a/anxa1a/anxa1b/gad1b/scn1lab/acox1/pfk…	70
GO:0006090	GO:0006090	pyruvate metabolic process	19/4227	48/17036	0.0168384	0.261232	0.245043	pgam1b/pfklb/gapdh/gapdhs/eno4/gpib/pkma/pfkpb/pgam2/pcxa/pfkma/eno3/pfkpa/pkmb/pdha1a/scn1lab/pfkmb/pcxb/pfkla	19
GO:0051053	GO:0051053	negative regulation of DNA metabolic process	19/4227	48/17036	0.0168384	0.261232	0.245043	rnf169/gmnn/hnrnpub/terf2ip/terf1/si:dkey-108k21.10/si:dkey-108k21.21/zgc:153405/si:ch211-113a14.24/helb/histh1l/h1m/si:dkey-23a13.9/si:dkey-23a13.17/si:ch73-368j24.11/si:ch73-368j24.12/si:ch1073-153i20.4/zgc:110425/zgc:163061	19
GO:0010817	GO:0010817	regulation of hormone levels	35/4227	101/17036	0.0169164	0.261232	0.245043	lef1/rdh8b/rfx3/apc/mtnr1bb/park7/tcf7l2/ide/vip/mtnr1ba/ica1/cyp11c1/cyp26c1/rcor1/cyp19a1a/slc44a4/rdh10b/rfx6/nkx6.1/amh/hmgn3/cyp17a2/syt9b/cyp11a2/cyp11a1/hsd17b12a/fdx1b/anxa1a/anxa1b/ache/cyp2r1/hsd17b12b/ano1/slc5a5/dhrs9	35
GO:0008154	GO:0008154	actin polymerization or depolymerization	46/4227	139/17036	0.0169967	0.261232	0.245043	tmod1/si:ch211-176g13.8/dbnla/rac3b/baiap2l1a/cdc42ep1a/cdc42ep4b/fmn2b/cfl1l/diaph2/zgc:158689/tmod4/spire1b/cfl2/si:ch211-175f11.5/evla/sptb/vaspb/spire1a/cap1/abi1b/arpc5b/dbn1/pfn2/zgc:114123/fmnl3/msrb2/twf1a/mical2b/cdc42ep1b/rac3a/zgc:86896/baiap2a/kank2/baiap2l1b/waslb/mical3b/add2/kank1b/cdc42ep2/si:dkey-40c11.2/kank1a/gsnb/catip/zgc:101810/kank3	46
GO:1902903	GO:1902903	regulation of supramolecular fiber organization	48/4227	146/17036	0.0170155	0.261232	0.245043	tmod1/apc/si:ch211-176g13.8/dbnla/rac3b/baiap2l1a/cdc42ep1a/cdc42ep4b/fmn2b/eml2/zgc:158689/tmod4/spire1b/si:ch211-175f11.5/evla/smyd2a/sptb/vaspb/spire1a/rbm24a/map1sb/myoc/arpc5b/dbn1/limk1b/camsap2a/pfn2/zgc:114123/terf1/twf1a/cyp11a1/cdc42ep1b/rac3a/zgc:86896/baiap2a/kank2/baiap2l1b/waslb/add2/kank1b/cdc42ep2/si:dkey-40c11.2/kank1a/gsnb/zgc:101810/fhod1/map1aa/kank3	48
GO:0051403	GO:0051403	stress-activated MAPK cascade	18/4227	45/17036	0.0175532	0.268193	0.251573	mapk14b/mapk8ip2/dusp22a/dusp22b/ripk1l/ripk2/ankrd6b/sh3rf1/map3k7/mapk10/csrp1a/magi3a/mapk8ip1a/mapk8ip3/axin1/klhdc10/mapk14a/map3k12	18
GO:0043900	GO:0043900	regulation of multi-organism process	17/4227	42/17036	0.0182408	0.276627	0.259484	zp3c/smad2/si:ch211-67f13.7/vip/zp3d.2/zp3d.1/gpatch3/zgc:173556/zp3b/zar1/zp3a.2/zp3a.1/nanog/cav1/pde3a/tarbp2/bmp15	17
GO:0034661	GO:0034661	ncRNA catabolic process	9/4227	18/17036	0.0183701	0.276627	0.259484	exosc9/dis3/exosc3/exosc7/lin28a/exosc4/exosc10/zgc:103759/exosc2	9
GO:0016053	GO:0016053	organic acid biosynthetic process	63/4227	200/17036	0.018792	0.276627	0.259484	lef1/pgam1b/tecrb/apc/park7/pfklb/pycr1b/aldh18a1/elovl6l/scdb/gapdh/gapdhs/eno4/rcor1/noxred1/mthfd1b/gpib/pkma/zgc:153031/has3/asns/acot11a/tecrl2b/glula/elovl1a/ptgs2a/rdh10b/pfkpb/mthfd1l/cad/pycr3/glulc/pgam2/pfkma/csad/elovl4b/eno3/pfkpa/fads2/abhd2b/pkmb/hsd17b12a/zgc:101540/shmt1/bcat1/anxa1a/anxa1b/gad1b/scn1lab/pfkmb/shmt2/mthfs/hsd17b12b/elovl7a/elovl8b/gls2a/lipg/got1l1/plod1a/cps1/ph…	63
GO:0009914	GO:0009914	hormone transport	16/4227	39/17036	0.0188815	0.276627	0.259484	rfx3/mtnr1bb/park7/tcf7l2/vip/mtnr1ba/ica1/slc44a4/rfx6/nkx6.1/amh/hmgn3/syt9b/anxa1a/anxa1b/ano1	16
GO:0010256	GO:0010256	endomembrane system organization	54/4227	168/17036	0.0189167	0.276627	0.259484	blzf1/pi4k2a/zdhhc8a/tmed2/si:dkey-27b3.2/myo18aa/zgc:152977/baiap2l1a/tmed9/lman2/anxa6/vmp1/zgc:158689/atp8b2/ndrg1b/sptbn5/ndrg1a/zgc:123035/plk3/si:ch73-111k22.3/arv1/tmed5/hook1/vps18/ubxn2a/lman1/atp8b3/pacsin1a/plekhm2/bin2a/si:ch73-206p6.1/cavin4b/cog7/cav2/cav1/atp8b4/bmb/cdipt/tmed1a/baiap2a/baiap2l1b/ano6/lemd3/tmpoa/lman2lb/bin2b/si:dkey-92f12.2/dysf/plscr3b/ano9b/ctdnep1b/tmed7/lnpa/…	54
GO:0006222	GO:0006222	UMP biosynthetic process	6/4227	10/17036	0.0189757	0.276627	0.259484	uck2b/uck1/uckl1b/dhodh/uck2a/umps	6
GO:0009173	GO:0009173	pyrimidine ribonucleoside monophosphate metabolic process	6/4227	10/17036	0.0189757	0.276627	0.259484	uck2b/uck1/uckl1b/dhodh/uck2a/umps	6
GO:0009174	GO:0009174	pyrimidine ribonucleoside monophosphate biosynthetic process	6/4227	10/17036	0.0189757	0.276627	0.259484	uck2b/uck1/uckl1b/dhodh/uck2a/umps	6
GO:0043144	GO:0043144	snoRNA processing	6/4227	10/17036	0.0189757	0.276627	0.259484	exosc3/fbl/exosc4/dkc1/exosc10/exosc2	6
GO:0046049	GO:0046049	UMP metabolic process	6/4227	10/17036	0.0189757	0.276627	0.259484	uck2b/uck1/uckl1b/dhodh/uck2a/umps	6
GO:0043588	GO:0043588	skin development	10/4227	21/17036	0.0195187	0.281957	0.264483	llgl2/bves/kdf1a/nrg2a/fbln1/rps6ka3a/anxa1a/anxa1b/atp1b1a/ikbkb	10
GO:0090276	GO:0090276	regulation of peptide hormone secretion	10/4227	21/17036	0.0195187	0.281957	0.264483	rfx3/mtnr1bb/tcf7l2/mtnr1ba/ica1/rfx6/nkx6.1/hmgn3/syt9b/ano1	10
GO:0021514	GO:0021514	ventral spinal cord interneuron differentiation	11/4227	24/17036	0.0201193	0.28434	0.266719	dla/dld/dlc/nkx2.9/notch1a/gata3/tal2/foxn4/notch1b/lhx3/evx2	11
GO:0030488	GO:0030488	tRNA methylation	11/4227	24/17036	0.0201193	0.28434	0.266719	mettl1/trmt5/si:dkey-85a20.4/trmt12/alkbh8/trmt61b/nsun2/tyw3/trmt6/trmt44/lcmt2	11
GO:0019395	GO:0019395	fatty acid oxidation	13/4227	30/17036	0.0202205	0.28434	0.266719	tysnd1/acoxl/hadhab/acadl/acadm/echdc2/hadhaa/eci1/phyh/acox1/acox3/acaa2/cpt2	13
GO:0019674	GO:0019674	NAD metabolic process	13/4227	30/17036	0.0202205	0.28434	0.266719	mdh1b/pfklb/si:dkey-145c18.3/si:dkey-145c18.2/pfkpb/nadk2/gpd1b/pfkma/nmnat1/pfkpa/pfkmb/nudt12/ido1	13
GO:0034440	GO:0034440	lipid oxidation	13/4227	30/17036	0.0202205	0.28434	0.266719	tysnd1/acoxl/hadhab/acadl/acadm/echdc2/hadhaa/eci1/phyh/acox1/acox3/acaa2/cpt2	13
GO:2000181	GO:2000181	negative regulation of blood vessel morphogenesis	13/4227	30/17036	0.0202205	0.28434	0.266719	ptenb/thbs2b/ism1/thbs2a/tnmd/sirt2/ptena/arhgap18/thbs1b/serpinf1/hoxc9a/ntn1a/thbs1a	13
GO:0051241	GO:0051241	negative regulation of multicellular organismal process	65/4227	208/17036	0.0204959	0.286943	0.269161	pros1/anxa5b/apc/musk/jupa/id1/srgap2/ptenb/thbs2b/llgl2/loxl3b/ism1/thbs2a/npas4l/loxl3a/smyd5/tnmd/rest/sirt2/sema6e/rspo3/gpatch3/ptena/id2a/sema3d/rgma/sema4ab/irf4a/ptch2/sema4e/klf2b/arhgap18/thbs1b/id2b/tnfrsf21/plg/notch1a/serpinf1/pias4a/amh/si:ch211-129c21.1/hoxc9a/sema5a/sox10/atp2a1/axin1/lpar2a/axin2/irak3/sema3c/anxa1a/anxa1b/her7/sema5bb/ntn1a/ptger3/si:cabz01029535.1/her8a/lgr4/sp…	65
GO:0090087	GO:0090087	regulation of peptide transport	29/4227	82/17036	0.0210892	0.293954	0.275737	arfip1/rfx3/mtnr1bb/hmgb1a/tlr8b/tcf7l2/cep131/sar1ab/si:ch211-210b2.2/panx1a/hmgb1b/mtnr1ba/ica1/si:dkey-206p8.1/anxa13l/tnfrsf21/rfx6/tlr5b/tlr5a/nkx6.1/hmgn3/syt9b/scamp5a/mief1/anxa1a/anxa1b/lgr4/ano1/zgc:153759	29
GO:0045944	GO:0045944	positive regulation of transcription by RNA polymerase II	128/4227	440/17036	0.0215129	0.298551	0.280049	tet2/maml3/si:ch73-109d9.2/bcl9/lef1/junba/pnx/lhx6/hmgb1a/ssbp2/mef2ca/nr2f1b/nr1d4b/rargb/jupa/sox13/sox9a/foxh1/epas1a/hmx3b/pprc1/osr1/mycla/npas4l/dpf2l/sirt2/meis3/zbtb16b/hmgb1b/onecutl/osr2/foxo3a/si:ch211-160f23.5/prox1a/gabpb1/eomesa/nr1d2b/top2b/hoxa3a/myclb/dlx5a/ctnnb2/ssbp3a/lhx8a/tcea1/adcyap1b/mycb/si:dkeyp-68b7.7/dpf3/max/si:ch211-195d17.2/atf6/lmx1a/hnrnpub/rfx6/si:ch73-21k16.1/…	128
GO:0009100	GO:0009100	glycoprotein metabolic process	83/4227	274/17036	0.0219951	0.303914	0.28508	si:dkey-26i13.5/chst12b/mogs/st8sia4/b3galt6/st3gal8/man2b1/park7/cant1b/st6galnac1.2/chst3b/galnt2/b3gat2/chst3a/hs3st1/st3gal5/fut11/mgat4b/syvn1/zgc:92907/fkrp/mgat1a/itm2ca/pomgnt2/galnt1/alg2/ext1a/b3gnt2b/fut8a/alk/serp1/st3gal2/st8sia2/b3gat1a/st3gal4/si:ch1073-440p11.2/st3gal1/ext1b/extl2/st3gal3b/uggt1/alg3/itm2cb/nus1/st6galnac6/st8sia5/sdf2/st6gal1/alg13/mgat5/zgc:194551/b3gnt7/gmppb/z…	83
GO:0046394	GO:0046394	carboxylic acid biosynthetic process	62/4227	198/17036	0.0222258	0.305774	0.286824	lef1/pgam1b/tecrb/apc/park7/pfklb/pycr1b/aldh18a1/elovl6l/scdb/gapdh/gapdhs/eno4/rcor1/noxred1/mthfd1b/gpib/pkma/zgc:153031/has3/asns/acot11a/tecrl2b/glula/elovl1a/ptgs2a/rdh10b/pfkpb/mthfd1l/cad/pycr3/glulc/pgam2/pfkma/elovl4b/eno3/pfkpa/fads2/abhd2b/pkmb/hsd17b12a/zgc:101540/shmt1/bcat1/anxa1a/anxa1b/gad1b/scn1lab/pfkmb/shmt2/mthfs/hsd17b12b/elovl7a/elovl8b/gls2a/lipg/got1l1/plod1a/cps1/phgdh/p…	62
GO:0035725	GO:0035725	sodium ion transmembrane transport	22/4227	59/17036	0.0223891	0.306692	0.287686	atp1a1a.5/wnk2/scn4aa/atp1b3b/scn3b/scn1ba/fxyd1/slc12a1/neto2b/scn1bb/slc9a3.1/atp1b3a/scn12aa/atp1b2a/scn4ab/wnk1b/scn1lab/atp1b1a/slc9a7/slc12a10.2/slc12a10.3/slc9a2	22
GO:0000712	GO:0000712	resolution of meiotic recombination intermediates	7/4227	13/17036	0.0232795	0.307947	0.288863	meiob/ercc4/eme1/msh4/top2b/hfm1/rmi1	7
GO:0009129	GO:0009129	pyrimidine nucleoside monophosphate metabolic process	7/4227	13/17036	0.0232795	0.307947	0.288863	dctd/uck2b/uck1/uckl1b/dhodh/uck2a/umps	7
GO:0009130	GO:0009130	pyrimidine nucleoside monophosphate biosynthetic process	7/4227	13/17036	0.0232795	0.307947	0.288863	dctd/uck2b/uck1/uckl1b/dhodh/uck2a/umps	7
GO:0021603	GO:0021603	cranial nerve formation	7/4227	13/17036	0.0232795	0.307947	0.288863	mdga2a/homer2/dlx5a/tuba1a/st8sia6/smarca4a/chn1	7
GO:0046365	GO:0046365	monosaccharide catabolic process	7/4227	13/17036	0.0232795	0.307947	0.288863	pfklb/galk1/gale/pfkpb/pfkma/pfkpa/pfkmb	7
GO:0050779	GO:0050779	RNA destabilization	7/4227	13/17036	0.0232795	0.307947	0.288863	mettl16/zfp36l1a/pabpc1b/rbm24a/zfp36l1b/cth1/mettl3	7
GO:0086001	GO:0086001	cardiac muscle cell action potential	7/4227	13/17036	0.0232795	0.307947	0.288863	scn3b/scn1ba/scn1bb/prrx1a/kcnh6a/atp1b1a/slc4a3	7
GO:0045786	GO:0045786	negative regulation of cell cycle	47/4227	145/17036	0.0233357	0.307947	0.288863	apc/btg3/prr11/hexim1/eme1/waca/cdkn3/fbxo5/aurkb/si:dkey-79d12.5/hormad1/wnt4b/fbxo43/id2a/gpr132a/mcl1a/top2b/ints3/gmnn/cdc14aa/plk3/dtl/ppp1r13bb/rb1/siah2l/btg2/si:dkey-42i9.4/cdkn1cb/rbl2/e2f7/mdm1/btg1/cdkn1ba/chek2/chfr/gas1b/dlg1/brinp3a.1/brinp3a.2/e2f8/men1/stk33/cdt1/cdc14b/rad9b/tp73/cdkn1d	47
GO:0071696	GO:0071696	ectodermal placode development	17/4227	43/17036	0.0233528	0.307947	0.288863	tdgf1/sox9a/foxh1/pax2a/msx1a/bmper/homer2/dlx5a/pnocb/fzd8a/st8sia6/axin1/sox9b/gata3/parp3/tfap2c/fgf3	17
GO:0051493	GO:0051493	regulation of cytoskeleton organization	77/4227	253/17036	0.0238234	0.311947	0.292615	tmod1/bora/apc/map6a/ska2/si:ch211-176g13.8/dbnla/ect2/rac3b/baiap2l1a/mlst8/cdc42ep1a/afap1/rhoq/cep131/cdc42ep4b/fmn2b/zgc:66426/eml2/zgc:158689/tmod4/stmn1b/spire1b/ptk2ba/si:ch211-175f11.5/evla/smyd2a/mapre3a/sptb/vaspb/stmn1a/atat1/spire1a/rbm24a/map1sb/myoc/rhov/arpc5b/stmn4/hnrnpub/si:dkey-6b12.5/dbn1/limk1b/rassf1/camsap2a/pfn2/zgc:114123/terf1/phldb2b/ek1/twf1a/cyp11a1/cdc42ep1b/arhgap17…	77
GO:0033043	GO:0033043	regulation of organelle organization	130/4227	449/17036	0.0238927	0.311947	0.292615	tmod1/bora/apc/ewsr1a/pmaip1/slc25a1a/map6a/ska2/si:ch211-176g13.8/dbnla/ect2/rac3b/baiap2l1a/mlst8/cdc42ep1a/afap1/rhoq/cep131/cdc42ep4b/fmn2b/pdcd2/zgc:66426/sar1ab/mad2l1bp/fbxo5/aurkb/meis3/bbc3/eml2/zgc:158689/hormad1/tmod4/wnt4b/gnl2/stmn1b/spire1b/fbxo43/ptk2ba/si:ch211-175f11.5/evla/smyd2a/mapre3a/sptb/vaspb/mcl1a/ehmt2/setdb1a/stmn1a/jarid2b/atat1/spire1a/rbm24a/cdc14aa/ppp1r7/map1sb/ezr…	130
GO:0006403	GO:0006403	RNA localization	27/4227	76/17036	0.0239506	0.311947	0.292615	pcid2/ltv1/ddx19/a1cf/thoc3/exosc3/si:dkeyp-97b10.3/nmd3/eny2/igf2bp3/thoc1/ndc1/hnrnpub/sdad1/slbp2/ncbp2/exosc10/znhit6/rrs1/thoc5/snupn/igf2bp1/znhit3/exosc2/gle1/nup35/upf3a	27
GO:0006661	GO:0006661	phosphatidylinositol biosynthetic process	16/4227	40/17036	0.0243864	0.316327	0.296723	pi4k2a/slc27a1b/pigo/pik3c2b/pigv/pik3c2a/pgap2/pigs/pik3cd/zgc:158659/mppe1/pign/pigm/cdipt/pigw/piga	16
GO:0006814	GO:0006814	sodium ion transport	34/4227	100/17036	0.0245119	0.316662	0.297038	atp1a1a.5/wnk2/scn4aa/slc38a6/klhl3/atp1b3b/scn3b/slc13a5b/scn1ba/fxyd1/hcn4/slc12a1/neto2b/scn1bb/slc9a3.1/atp1b3a/scn12aa/mfsd4b/cldnb/nkain4/atp1b2a/hcn4l/slc17a6a/slc5a12/scn4ab/wnk1b/scn1lab/atp1b1a/slc9a7/slc12a10.2/slc12a10.3/slc38a7/slc9a2/slc38a11	34
GO:0072329	GO:0072329	monocarboxylic acid catabolic process	20/4227	53/17036	0.0250726	0.322594	0.302602	slc27a4/acads/tysnd1/acoxl/aldh5a1/hadhab/acadl/acadm/echdc2/si:ch73-21k16.1/hadhaa/abhd2b/si:ch211-256m1.8/eci1/phyh/acox1/fah/acox3/acaa2/cpt2	20
GO:0006997	GO:0006997	nucleus organization	15/4227	37/17036	0.025378	0.325207	0.305054	zdhhc8a/zgc:152977/psme4a/ahctf1/fam118b/ndc1/ubxn2a/bmb/coil/lemd3/tmpoa/si:dkey-92f12.2/ctdnep1b/piwil1/nup35	15
GO:0071910	GO:0071910	determination of liver left/right asymmetry	8/4227	16/17036	0.0259088	0.330675	0.310182	rargb/dld/fgfr2/sept6/gmnn/gpr22a/ccdc151/dnah7	8
GO:0009064	GO:0009064	glutamine family amino acid metabolic process	19/4227	50/17036	0.0264962	0.33682	0.315947	pycr1b/zgc:92040/aldh18a1/oat/noxred1/gmps/asns/glula/cad/pycr3/glulc/gls2b/si:ch211-256m1.8/prodhb/nos1/dao.2/nos2a/gls2a/cps1	19
GO:0001838	GO:0001838	embryonic epithelial tube formation	13/4227	31/17036	0.0270901	0.341636	0.320464	tdgf1/dvl1b/nin/pcdh19/phactr4b/pard6a/vaspb/pard6gb/shroom3/vangl2/mdka/cdh1/zic2a	13
GO:1901343	GO:1901343	negative regulation of vasculature development	13/4227	31/17036	0.0270901	0.341636	0.320464	ptenb/thbs2b/ism1/thbs2a/tnmd/sirt2/ptena/arhgap18/thbs1b/serpinf1/hoxc9a/ntn1a/thbs1a	13
GO:0034472	GO:0034472	snRNA 3'-end processing	9/4227	19/17036	0.0273578	0.342295	0.321082	exosc9/ints2/ints5/exosc3/exosc7/exosc4/ints7/exosc2/ints6	9
GO:0098781	GO:0098781	ncRNA transcription	9/4227	19/17036	0.0273578	0.342295	0.321082	snapc1b/cd3eap/rpap2/chd7/snapc1a/taf1b/ell/ncl/nol11	9
GO:0006383	GO:0006383	transcription by RNA polymerase III	12/4227	28/17036	0.0277016	0.343382	0.322102	maf1/tbp/snapc1b/gtf3c6/polr3glb/snapc1a/brf1b/gtf3c5/polr3k/polr3g/zgc:112356/polr3d	12
GO:0009218	GO:0009218	pyrimidine ribonucleotide metabolic process	10/4227	22/17036	0.0279849	0.343382	0.322102	nme2a/nme5/uck2b/cad/uck1/uckl1b/dhodh/uck2a/umps/nme8	10
GO:0009220	GO:0009220	pyrimidine ribonucleotide biosynthetic process	10/4227	22/17036	0.0279849	0.343382	0.322102	nme2a/nme5/uck2b/cad/uck1/uckl1b/dhodh/uck2a/umps/nme8	10
GO:0046132	GO:0046132	pyrimidine ribonucleoside biosynthetic process	10/4227	22/17036	0.0279849	0.343382	0.322102	nme2a/nme5/uck2b/cad/uck1/uckl1b/dhodh/uck2a/umps/nme8	10
GO:0046134	GO:0046134	pyrimidine nucleoside biosynthetic process	10/4227	22/17036	0.0279849	0.343382	0.322102	nme2a/nme5/uck2b/cad/uck1/uckl1b/dhodh/uck2a/umps/nme8	10
GO:0005975	GO:0005975	carbohydrate metabolic process	96/4227	325/17036	0.0286293	0.349085	0.327452	slc5a3a/mdh1b/si:dkey-26i13.5/chst12b/nansa/mogs/ugp2a/pgam1b/dgat2/mdh2/b3gat1b/man2b1/phka2/pfklb/dcxr/g6pc3/ptenb/pgp/phkg2/galk1/chst3b/chst3a/pygl/maea/b4galt7/ganab/gapdh/gpd1l/gapdhs/ext1a/khk/eno4/ptena/b3gnt2b/mdh1ab/gale/zgc:66313/gpib/pkma/has3/lctlb/arpp19a/treh/fuca1.1/casd1/ext1b/fggy/extl2/chst2a/gyg1a/pask/pfkpb/pgam2/ppp1r3b/neu3.2/pcxa/pygma/phka1b/gpd1b/ippk/hyal2b/zgc:194551/b…	96
GO:0030041	GO:0030041	actin filament polymerization	40/4227	122/17036	0.0286694	0.349085	0.327452	tmod1/si:ch211-176g13.8/dbnla/rac3b/baiap2l1a/cdc42ep1a/cdc42ep4b/fmn2b/diaph2/zgc:158689/tmod4/spire1b/si:ch211-175f11.5/evla/sptb/vaspb/spire1a/arpc5b/dbn1/pfn2/zgc:114123/fmnl3/msrb2/twf1a/cdc42ep1b/rac3a/zgc:86896/baiap2a/kank2/baiap2l1b/waslb/add2/kank1b/cdc42ep2/si:dkey-40c11.2/kank1a/gsnb/catip/zgc:101810/kank3	40
GO:0022613	GO:0022613	ribonucleoprotein complex biogenesis	93/4227	314/17036	0.0288393	0.349814	0.328136	exosc9/pwp2h/esf1/patl1/ltv1/ddx56/fbxw11b/nle1/nsun5/ddx49/wdr18/gnl3l/rrp9/heatr1/snu13b/c1d/urb2/polr1c/prpf19/exosc3/nmd3/urb1/rrp8/pih1d2/mettl16/rbfa/prpf31/gnl2/fbl/dcaf13/wdr43/nol10/srsf10b/clns1a/utp15/exosc7/bop1/mrpl36/srfbp1/imp3/nsun4/ebna1bp2/riok1/znf622/rpf2/cebpz/rpl7l1/bxdc2/rexo4/sdad1/celf4/noc4l/nhp2/mrpl22/ddx52/dkc1/mrpl20/bysl/ftsj3/fam207a/ncl/exosc10/zgc:56304/znhit6/rr…	93
GO:0072525	GO:0072525	pyridine-containing compound biosynthetic process	21/4227	57/17036	0.0289773	0.350152	0.328452	pgam1b/pfklb/gapdh/gapdhs/eno4/gpib/pkma/si:dkey-145c18.3/si:dkey-145c18.2/pfkpb/pgam2/nadk2/pfkma/nmnat1/eno3/pfkpa/pkmb/scn1lab/pfkmb/ido1/pfkla	21
GO:0006979	GO:0006979	response to oxidative stress	29/4227	84/17036	0.0292699	0.351018	0.329265	per1a/park7/nme5/gpx3/sirt2/ercc2/trpm7/sesn2/prdx1/ptgs2a/apoda.2/prdx6/msra/diablob/prdx5/ncl/msrb2/apodb/epx/cat/duox/hmox1a/msrb3/prdx4/anxa1a/anxa1b/gpx8/nfe2l2a/cerkl	29
GO:0009306	GO:0009306	protein secretion	29/4227	84/17036	0.0292699	0.351018	0.329265	arfip1/rfx3/mtnr1bb/hmgb1a/tlr8b/park7/tcf7l2/vip/panx1a/hmgb1b/mtnr1ba/ica1/wls/rab15/tnfrsf21/rfx6/tlr5b/tlr5a/mia3/nkx6.1/hmgn3/syt9b/scamp5a/rab3db/anxa1a/anxa1b/lgr4/ano1/zgc:153759	29
GO:0032271	GO:0032271	regulation of protein polymerization	39/4227	119/17036	0.0306274	0.365277	0.34264	tmod1/si:ch211-176g13.8/dbnla/rac3b/baiap2l1a/cdc42ep1a/cdc42ep4b/fmn2b/eml2/zgc:158689/tmod4/spire1b/si:ch211-175f11.5/evla/sptb/vaspb/spire1a/arpc5b/dbn1/pfn2/zgc:114123/terf1/twf1a/cyp11a1/cdc42ep1b/rac3a/zgc:86896/baiap2a/kank2/baiap2l1b/waslb/add2/kank1b/cdc42ep2/si:dkey-40c11.2/kank1a/gsnb/zgc:101810/kank3	39
GO:0051258	GO:0051258	protein polymerization	50/4227	158/17036	0.0306888	0.365277	0.34264	mxa/mxb/tmod1/si:ch211-176g13.8/dbnla/rac3b/baiap2l1a/cdc42ep1a/ndel1a/cdc42ep4b/fmn2b/diaph2/eml2/zgc:158689/tmod4/spire1b/si:ch211-175f11.5/evla/sptb/vaspb/spire1a/arpc5b/dbn1/pfn2/zgc:114123/fmnl3/terf1/msrb2/twf1a/mxg/cyp11a1/cdc42ep1b/rac3a/zgc:86896/ndel1b/baiap2a/kank2/baiap2l1b/waslb/add2/kank1b/cdc42ep2/si:dkey-40c11.2/kank1a/gsnb/catip/zgc:101810/kank3/mxc/mxe	50
GO:0010970	GO:0010970	transport along microtubule	23/4227	64/17036	0.0308993	0.36641	0.343703	ift46/kif17/ndel1a/cep131/wdr35/fmr1/si:ch211-235e9.8/dync2h1/kif23/ift57/ift172/kif13bb/wdr34/tmem201/lca5/mak/mapk8ip3/rhot1a/flr/ndel1b/ttc26/kif5ab/ift81	23
GO:0000904	GO:0000904	cell morphogenesis involved in differentiation	135/4227	472/17036	0.0315045	0.372198	0.349132	en1b/crmp1/tet2/arl13b/unc5c/apc/musk/dpysl2b/robo3/dbnla/cdkl5/pcdh17/rac1a/foxj1b/unk/emx2/matn3b/zfyve26/fmr1/tnmd/rest/exosc3/ncam1b/alcamb/pitpnaa/bves/sema6e/ptk2ab/gdf6a/marcksb/dpysl5a/hdc/nptnb/clns1a/pak1/sema3d/vaspb/rbm7/hnrnpr/ncaldb/top2b/sema4ab/pard6gb/tmem106bb/thsd7aa/si:ch211-241e1.3/ephb3a/usp33/ssbp3a/ptprfb/col15a1b/ptch2/tnr/map1sb/sema4e/si:ch211-106n13.3/lama4/cnr1/katna1…	135
GO:0008654	GO:0008654	phospholipid biosynthetic process	30/4227	88/17036	0.0319639	0.372903	0.349794	pi4k2a/slc27a1b/pigo/zgc:77375/tamm41/pik3c2b/fdps/mboat7/pigv/ptdss1a/crls1/pik3c2a/lpcat1/ptdss1b/pld1a/pgap2/pigs/pik3cd/zgc:158659/mppe1/pign/pigm/cdipt/pigw/mvk/serinc5/lpcat2/cept1a/piga/si:ch211-168k14.2	30
GO:0009163	GO:0009163	nucleoside biosynthetic process	15/4227	38/17036	0.0325518	0.372903	0.349794	nme2a/adkb/adka/nme5/gmps/uck2b/prtfdc1/cad/uck1/uckl1b/dhodh/uck2a/impdh2/umps/nme8	15
GO:0030217	GO:0030217	T cell differentiation	15/4227	38/17036	0.0325518	0.372903	0.349794	snapc3/loxl3b/loxl3a/ndrg1b/eomesa/chd7/sh3rf1/gemin5/rag2/tnpo3/gata3/anxa1a/anxa1b/mettl3/jak3	15
GO:0042455	GO:0042455	ribonucleoside biosynthetic process	15/4227	38/17036	0.0325518	0.372903	0.349794	nme2a/adkb/adka/nme5/gmps/uck2b/prtfdc1/cad/uck1/uckl1b/dhodh/uck2a/impdh2/umps/nme8	15
GO:0051453	GO:0051453	regulation of intracellular pH	15/4227	38/17036	0.0325518	0.372903	0.349794	tcirg1a/slc4a5/ca15b/tcirg1b/slc9a3.1/slc4a2b/si:ch73-173p19.2/atp6v0a1a/slc4a1a/rogdi/slc9a7/slc4a8/slc26a6l/slc26a6/slc9a2	15
GO:0006612	GO:0006612	protein targeting to membrane	22/4227	61/17036	0.0329295	0.372903	0.349794	zgc:77880/vps37a/golga7ba/golga7/zdhhc4/slc9a3r1a/zdhhc24/si:ch211-210b2.2/sec61b/srp14/zdhhc7/zdhhc18b/sec62/pex3/tram2/efhc1/tram1/zdhhc23b/zdhhc20b/mief1/sec61a1/sec61a1l	22
GO:0072175	GO:0072175	epithelial tube formation	22/4227	61/17036	0.0329295	0.372903	0.349794	tdgf1/dvl1b/sox9a/pax2a/nin/msx1a/sparc/pcdh19/bmper/phactr4b/pard6a/vaspb/pard6gb/shroom3/sox9b/gata3/tfap2c/vangl2/mdka/cdh1/fgf3/zic2a	22
GO:0002819	GO:0002819	regulation of adaptive immune response	6/4227	11/17036	0.0330896	0.372903	0.349794	trpm4b.1/loxl3b/loxl3a/trpm4a/anxa1a/anxa1b	6
GO:0002822	GO:0002822	regulation of adaptive immune response based on somatic recombination of immune receptors built from immunoglobulin superfamily domains	6/4227	11/17036	0.0330896	0.372903	0.349794	trpm4b.1/loxl3b/loxl3a/trpm4a/anxa1a/anxa1b	6
GO:0006002	GO:0006002	fructose 6-phosphate metabolic process	6/4227	11/17036	0.0330896	0.372903	0.349794	pfklb/pfkpb/pfkma/pfkpa/pfkmb/pfkla	6
GO:0032836	GO:0032836	glomerular basement membrane development	6/4227	11/17036	0.0330896	0.372903	0.349794	plce1/kirrel3l/sulf1/kank2/myh9a/p4htm	6
GO:0046632	GO:0046632	alpha-beta T cell differentiation	6/4227	11/17036	0.0330896	0.372903	0.349794	loxl3b/loxl3a/eomesa/sh3rf1/anxa1a/anxa1b	6
GO:0060035	GO:0060035	notochord cell development	6/4227	11/17036	0.0330896	0.372903	0.349794	vps18/rab32a/cav1/atp6v1e1b/ngs/atp6v1f	6
GO:0000079	GO:0000079	regulation of cyclin-dependent protein serine/threonine kinase activity	14/4227	35/17036	0.0340684	0.378564	0.355104	ccna1/hexim1/ccna2/ccne2/ccnl1a/ccnl1b/ccnjl/ccny/cdkn1cb/ccnd2b/cdkn1ba/ccnh/ccnb1/ccnb2	14
GO:0000082	GO:0000082	G1/S transition of mitotic cell cycle	14/4227	35/17036	0.0340684	0.378564	0.355104	psme2/meis1b/trim71/ccne2/gpr132a/plk3/rb1/rbl2/e2f7/ccnd2b/cdkn1ba/anxa1a/anxa1b/usp37	14
GO:0006112	GO:0006112	energy reserve metabolic process	14/4227	35/17036	0.0340684	0.378564	0.355104	ugp2a/phka2/phkg2/pygl/khk/gyg1a/pask/ppp1r3b/pygma/phka1b/gyg1b/gys2/pygmb/zgc:77112	14
GO:1904029	GO:1904029	regulation of cyclin-dependent protein kinase activity	14/4227	35/17036	0.0340684	0.378564	0.355104	ccna1/hexim1/ccna2/ccne2/ccnl1a/ccnl1b/ccnjl/ccny/cdkn1cb/ccnd2b/cdkn1ba/ccnh/ccnb1/ccnb2	14
GO:0016052	GO:0016052	carbohydrate catabolic process	24/4227	68/17036	0.0345511	0.382297	0.358606	pgam1b/pfklb/galk1/pygl/gapdh/gapdhs/eno4/gale/gpib/pkma/pfkpb/pgam2/ppp1r3b/neu3.2/pygma/pfkma/eno3/pfkpa/pkmb/scn1lab/pfkmb/pygmb/enosf1/pfkla	24
GO:0048048	GO:0048048	embryonic eye morphogenesis	18/4227	48/17036	0.0346449	0.382297	0.358606	tdgf1/foxh1/six3b/znf503/pax2a/pitx2/sox4b/phactr4b/sox11b/mfap2/fzd8a/smarca4a/axin1/vangl2/six7/vax2/efnb2a/epb41l5	18
GO:0009953	GO:0009953	dorsal/ventral pattern formation	48/4227	152/17036	0.0348756	0.383511	0.359744	pkd2/tdgf1/ift46/robo3/smad9/snai1a/ppp4cb/foxh1/zbtb4/bambia/ddit4/jag1b/rest/bmper/gdf6a/sybu/rspo3/ctsba/pak1/eomesa/ctnnb2/lrrc6/ankrd6b/max/sox11b/pou5f3/chrdl2/alg13/acvr1ba/sulf1/szl/glcea/cav1/tob1a/ppp4ca/axin1/axin2/caprin2/bmpr1ba/ccl19a.1/foxn4/lhx3/sox19b/fgf3/ahcyl1/evx2/zic2a/gpr161	48
GO:0010107	GO:0010107	potassium ion import	21/4227	58/17036	0.0350906	0.384545	0.360714	atp1a1a.5/wnk2/atp1b3b/kcnj13/kcnj14/zgc:162160/slc12a1/kcnj1a.6/kcnj1a.5/kcnj1a.1/kcnj5/atp1b3a/slc12a7a/atp1b2a/kcnj11l/wnk1b/kcnj3b/atp1b1a/slc12a10.2/slc12a10.3/slc12a8	21
GO:0022604	GO:0022604	regulation of cell morphogenesis	59/4227	192/17036	0.0361867	0.39381	0.369404	cdc42se2/musk/dpysl2b/dbnla/qrich1/cdkl5/cdc42ep1a/rhoq/cdc42ep4b/fmr1/bves/sema6e/si:ch211-266o15.1/wtip/pak1/sema3d/ncaldb/sema4ab/pard6gb/zmym4/palmda/col15a1b/tnika/palm1b/sema4e/rhov/si:dkey-6b12.5/nkx6.1/arl3l1/dbn1/si:ch211-129c21.1/fmnl3/pik3cd/nrp1a/sema5a/lrrc4bb/cdc42ep1b/fmnl1a/plxnb2a/caprin2/plxnc1/sema3c/brwd3/anxa1a/rhogc/cdc42ep2/si:dkey-40c11.2/anxa1b/plxna1b/sema5bb/fmnl2b/ntn1…	59
GO:0010906	GO:0010906	regulation of glucose metabolic process	7/4227	14/17036	0.0367583	0.39381	0.369404	maea/khk/arpp19a/pask/ppp1r3b/fam3a/fam3c	7
GO:0016075	GO:0016075	rRNA catabolic process	7/4227	14/17036	0.0367583	0.39381	0.369404	exosc9/dis3/exosc3/exosc7/exosc4/exosc10/exosc2	7
GO:0006024	GO:0006024	glycosaminoglycan biosynthetic process	12/4227	29/17036	0.0368502	0.39381	0.369404	si:dkey-26i13.5/chst12b/b3galt6/chst3b/chst3a/ext1a/has3/ext1b/extl2/xylt1/chst7/glceb	12
GO:0008643	GO:0008643	carbohydrate transport	12/4227	29/17036	0.0368502	0.39381	0.369404	slc2a15b/mfsd2aa/slc35a4/tmem144b/pid1/mfsd12a/slc2a2/mfsd4b/slc2a1a/slc35b1/slc37a2/slc2a8	12
GO:0016525	GO:0016525	negative regulation of angiogenesis	12/4227	29/17036	0.0368502	0.39381	0.369404	ptenb/thbs2b/ism1/thbs2a/tnmd/sirt2/ptena/arhgap18/thbs1b/serpinf1/ntn1a/thbs1a	12
GO:0099111	GO:0099111	microtubule-based transport	23/4227	65/17036	0.0369011	0.39381	0.369404	ift46/kif17/ndel1a/cep131/wdr35/fmr1/si:ch211-235e9.8/dync2h1/kif23/ift57/ift172/kif13bb/wdr34/tmem201/lca5/mak/mapk8ip3/rhot1a/flr/ndel1b/ttc26/kif5ab/ift81	23
GO:0006733	GO:0006733	oxidoreduction coenzyme metabolic process	30/4227	89/17036	0.0370866	0.39381	0.369404	mdh1b/pgam1b/pfklb/gapdh/gapdhs/eno4/coq6/gpib/pkma/nnt2/si:dkey-145c18.3/si:dkey-145c18.2/pfkpb/pgam2/nadk2/gpd1b/pfkma/nmnat1/eno3/pfkpa/pkmb/si:ch73-141c7.1/coq5/coq4/scn1lab/pfkmb/nudt12/ido1/coq10b/pfkla	30
GO:0006399	GO:0006399	tRNA metabolic process	47/4227	149/17036	0.0371855	0.39381	0.369404	trmt10c/ptcd1/exosc9/thumpd1/mettl1/tsen2/rpusd4/trmt2b/trmt5/si:dkey-85a20.4/thg1l/trmt12/exosc3/nars2/alkbh8/pop1/trmt61b/qrsl1/dus3l/exosc7/vars2/nsun2/elp2/tyw3/rars2/trmt6/pus1/exosc10/pus3/dus2/elac2/si:ch211-256m1.8/dus1l/polr3k/qtrt1/exosc2/dph3/elp4/mtfmt/ctu2/trmt44/sepsecs/ctu1/wdr4/wars2/lcmt2/adat3	47
GO:0006643	GO:0006643	membrane lipid metabolic process	38/4227	117/17036	0.0371872	0.39381	0.369404	pigo/smpd1/si:ch73-267c23.10/degs1/elovl6l/st3gal5/gm2a/gal3st2/pigv/aldh5a1/galcb/cers3b/st3gal4/cers2a/elovl1a/arv1/galca/st6galnac6/smpd4/neu3.2/pgap2/pigs/cers1/cers5/elovl4b/mppe1/pign/pigm/pdxdc1/pigw/serinc5/gal3st3/gba2/acer2/elovl7a/elovl8b/piga/elovl7b	38
GO:0048469	GO:0048469	cell maturation	20/4227	55/17036	0.0373891	0.39381	0.369404	maea/rest/adnp2a/paqr7b/ctbp2a/snap25b/adnp2b/buc/gsdf/rb1/amh/e2f1/ndrg4/abhd2b/nsfa/pde3a/ccnb1/mettl3/epoa/bmp15	20
GO:1903670	GO:1903670	regulation of sprouting angiogenesis	11/4227	26/17036	0.0379717	0.39381	0.369404	syk/jcada/scg2b/arhgap18/sox11b/adgrg6/itgb1a/nrp1a/anxa1a/anxa1b/ptger3	11
GO:0006479	GO:0006479	protein methylation	25/4227	72/17036	0.0382104	0.39381	0.369404	eed/prmt9/setd4/setmar/lcmt1/fbl/smyd2a/ehmt2/setdb1a/jarid2b/mettl13/wdr5/prdm5/dnmt3bb.2/prdm14/prmt6/carm1/dnmt1/ehmt1a/ntmt1/hemk1/phf19/suv39h1b/setd1bb/prmt2	25
GO:0008213	GO:0008213	protein alkylation	25/4227	72/17036	0.0382104	0.39381	0.369404	eed/prmt9/setd4/setmar/lcmt1/fbl/smyd2a/ehmt2/setdb1a/jarid2b/mettl13/wdr5/prdm5/dnmt3bb.2/prdm14/prmt6/carm1/dnmt1/ehmt1a/ntmt1/hemk1/phf19/suv39h1b/setd1bb/prmt2	25
GO:0019362	GO:0019362	pyridine nucleotide metabolic process	25/4227	72/17036	0.0382104	0.39381	0.369404	mdh1b/pgam1b/pfklb/gapdh/gapdhs/eno4/gpib/pkma/nnt2/si:dkey-145c18.3/si:dkey-145c18.2/pfkpb/pgam2/nadk2/gpd1b/pfkma/nmnat1/eno3/pfkpa/pkmb/scn1lab/pfkmb/nudt12/ido1/pfkla	25
GO:0046496	GO:0046496	nicotinamide nucleotide metabolic process	25/4227	72/17036	0.0382104	0.39381	0.369404	mdh1b/pgam1b/pfklb/gapdh/gapdhs/eno4/gpib/pkma/nnt2/si:dkey-145c18.3/si:dkey-145c18.2/pfkpb/pgam2/nadk2/gpd1b/pfkma/nmnat1/eno3/pfkpa/pkmb/scn1lab/pfkmb/nudt12/ido1/pfkla	25
GO:0001655	GO:0001655	urogenital system development	58/4227	189/17036	0.0384653	0.39381	0.369404	fat1a/pkd2/tdgf1/ift46/slc41a1/plce1/pkd1b/camk2g1/pax2a/osr1/dcdc2b/tmem234/klhl3/nek8/kirrel3l/myo1eb/osr2/ptger2a/wtip/pard6gb/thsd7aa/ptgs2a/cdh6/lrrc6/ezrb/ift172/shroom3/nphs2/wwtr1/sulf1/sept15/irx3b/glis2b/kank2/cacna1c/gdnfb/anxa1a/myo1ca/vcana/anxa1b/inpp5e/ap1m2/ttc26/myh9a/usp40/etv5b/ccdc40/rp2/sec61a1/vhl/p4htm/sec61a1l/vangl2/kcnj10a/epoa/dnaaf1/ift81/epb41l5	58
GO:0051307	GO:0051307	meiotic chromosome separation	8/4227	17/17036	0.0385108	0.39381	0.369404	meiob/ercc4/eme1/msh4/top2b/hfm1/m1ap/rmi1	8
GO:0080154	GO:0080154	regulation of fertilization	8/4227	17/17036	0.0385108	0.39381	0.369404	zp3c/si:ch211-67f13.7/zp3d.2/zp3d.1/zgc:173556/zp3b/zp3a.2/zp3a.1	8
GO:0000038	GO:0000038	very long-chain fatty acid metabolic process	10/4227	23/17036	0.0387612	0.39381	0.369404	tecrb/slc27a4/elovl6l/tecrl2b/elovl1a/elovl4b/acox1/elovl7a/elovl8b/elovl7b	10
GO:0006636	GO:0006636	unsaturated fatty acid biosynthetic process	10/4227	23/17036	0.0387612	0.39381	0.369404	elovl6l/scdb/elovl1a/ptgs2a/elovl4b/fads2/anxa1a/anxa1b/elovl7a/elovl7b	10
GO:0007050	GO:0007050	cell cycle arrest	10/4227	23/17036	0.0387612	0.39381	0.369404	apc/prr11/cdkn3/cdc14aa/cdkn1cb/cdkn1ba/gas1b/cdc14b/tp73/cdkn1d	10
GO:0035050	GO:0035050	embryonic heart tube development	53/4227	171/17036	0.0388781	0.39381	0.369404	lmo7b/pkd2/apc/ptpn11a/trib3/foxh1/ep300a/foxj1b/camk2g1/meis1b/pitx2/pdlim7/nek8/gdf3/wtip/pak1/sema3d/cfap20/snx10a/pard6gb/rbm24a/chd7/prrx1a/lrrc6/scn12aa/meis2b/dub/slc8a4a/ncl/ndrg4/mical2b/cald1b/glis2b/smarca4a/adap2/ccdc103/foxj1a/gpr22a/pkp2/atp6v1f/cacna1c/tbx1/foxn4/rangrf/tbx3a/dzip1/bmpr2a/ccdc40/ntn1a/rp2/dnaaf1/atp2a2a/dhrs9	53
GO:0009148	GO:0009148	pyrimidine nucleoside triphosphate biosynthetic process	9/4227	20/17036	0.039034	0.39381	0.369404	nme2a/nme5/cmpk2/uck2b/cad/uck1/uckl1b/uck2a/nme8	9
GO:0009435	GO:0009435	NAD biosynthetic process	9/4227	20/17036	0.039034	0.39381	0.369404	pfklb/si:dkey-145c18.3/si:dkey-145c18.2/pfkpb/pfkma/nmnat1/pfkpa/pfkmb/ido1	9
GO:0031589	GO:0031589	cell-substrate adhesion	29/4227	86/17036	0.039686	0.399121	0.374386	blzf1/myo18aa/si:dkey-32n7.7/si:ch211-39f2.3/nid1a/bves/si:dkey-71b5.7/ddr2b/emilin2a/lama4/myoc/emilin1a/ecm2/si:dkey-32e6.6/lamb2/itgb1a/ek1/parvb/parvg/lamb4/pxna/tecta/ntn4/parvab/emilin2b/itgb4/si:dkey-6n6.1/itgb5/itgbl1	29
GO:0090150	GO:0090150	establishment of protein localization to membrane	33/4227	100/17036	0.0400767	0.401778	0.376879	blzf1/zgc:77880/vps37a/timm10/golga7ba/si:dkey-27b3.2/golga7/zdhhc4/slc9a3r1a/zdhhc24/si:ch211-210b2.2/sec61b/srp14/si:dkey-206p8.1/zdhhc7/agk/zdhhc18b/anxa13l/sec62/pex3/tram2/efhc1/timm13/tram1/zdhhc23b/zdhhc20b/mief1/nsfa/samm50l/sec61a1/sec61a1l/sys1/grip2a	33
GO:0044282	GO:0044282	small molecule catabolic process	60/4227	197/17036	0.041214	0.41188	0.386355	slc27a4/acads/pfklb/zgc:92040/ptenb/galk1/oat/tysnd1/acoxl/zgc:63568/zgc:77938/qdpra/si:dkey-40g16.6/aldh5a1/sdsl/ptena/hmgcl/gale/tdh2/hadhab/aldh6a1/got2a/uraha/acadl/acadm/pfkpb/cyp46a1.2/echdc2/si:ch73-21k16.1/hadhaa/oxct1b/pfkma/impa2/pfkpa/abhd2b/si:ch211-256m1.8/gcat/eci1/shmt1/phyh/prodhb/nos1/dao.2/nos2a/gldc/inpp5jb/acox1/pfkmb/shmt2/fah/got2b/enosf1/acox3/acaa2/cpt2/gls2a/amt/oxct1a/in…	60
GO:0032535	GO:0032535	regulation of cellular component size	63/4227	208/17036	0.0414092	0.412534	0.386969	tmod1/musk/dpysl2b/si:ch211-176g13.8/dbnla/cdkl5/rac3b/baiap2l1a/cdc42ep1a/cdc42ep4b/fmn2b/zgc:158689/tmod4/sema6e/spire1b/si:ch211-175f11.5/evla/sptb/clns1a/slc12a1/sema3d/vaspb/ncaldb/pex11b/sema4ab/pard6gb/spire1a/slc12a7a/sema4e/arpc5b/nkx6.1/arl3l1/dbn1/si:ch211-129c21.1/pfn2/zgc:114123/pik3cd/sema5a/twf1a/cdc42ep1b/rac3a/zgc:86896/baiap2a/kank2/baiap2l1b/waslb/lamtor4/sema3c/add2/kank1b/cdc…	63
GO:0007264	GO:0007264	small GTPase mediated signal transduction	116/4227	405/17036	0.0417899	0.414438	0.388754	rasa3/farp1/mcf2la/rasgrf2a/cdc42se2/psd3l/rasgef1bb/rab36/ksr1a/ect2/mcf2l2/rap1ab/plekhg5a/sipa1l2/rac3b/plce1/rhobtb1/rac1a/cdc42ep1a/rhoq/cdc42ep4b/dock1/psd2/lpar4/diaph2/rab33ba/arhgap32a/plekhg2/tnfaip1/gpr4/ksr1b/gpr55a/ngef/tiam1b/arhgef2/triob/rapgef5b/phactr4b/rab25b/rab11al/iqsec3b/plekhg7/zgc:162879/rasgrp4/rap2b/rapgef5a/setdb1a/rit1/ctnnal1/vav3b/ralab/rab2a/rab6bb/rab11bb/akap12b/…	116
GO:0021700	GO:0021700	developmental maturation	26/4227	76/17036	0.0418611	0.414438	0.388754	neurod2/maea/rest/prkcg/adnp2a/paqr7b/gdf6a/ctbp2a/snap25b/adnp2b/chd7/buc/vps18/gsdf/rb1/amh/e2f1/ndrg4/abhd2b/nsfa/pde3a/ccnb1/mettl3/epoa/bmp15/sin3b	26
GO:0031503	GO:0031503	protein-containing complex localization	38/4227	118/17036	0.0420958	0.415467	0.38972	pcid2/ltv1/dlg2/ift46/ddx19/kif17/cep131/si:dkey-196h17.9/wdr35/thoc3/dlg3/si:dkeyp-97b10.3/nmd3/dync2h1/eny2/cacng7a/thoc1/ift57/dnm3a/tnfaip2a/ift172/sdad1/wdr34/lca5/mak/rrs1/thoc5/flr/cacng4b/dnm1a/dnm1b/ttc26/dlg1/kif5ab/gle1/grip2a/ift81/epb41l5	38
GO:0062012	GO:0062012	regulation of small molecule metabolic process	18/4227	49/17036	0.0424225	0.415545	0.389793	lef1/apc/tysnd1/maea/khk/rcor1/arpp19a/pask/ppp1r3b/fam3a/fam3c/nos1/anxa1a/nos2a/anxa1b/scn1lab/shmt2/acaa2	18
GO:0030833	GO:0030833	regulation of actin filament polymerization	36/4227	111/17036	0.042496	0.415545	0.389793	tmod1/si:ch211-176g13.8/dbnla/rac3b/baiap2l1a/cdc42ep1a/cdc42ep4b/fmn2b/zgc:158689/tmod4/spire1b/si:ch211-175f11.5/evla/sptb/vaspb/spire1a/arpc5b/dbn1/pfn2/zgc:114123/twf1a/cdc42ep1b/rac3a/zgc:86896/baiap2a/kank2/baiap2l1b/waslb/add2/kank1b/cdc42ep2/si:dkey-40c11.2/kank1a/gsnb/zgc:101810/kank3	36
GO:0051052	GO:0051052	regulation of DNA metabolic process	36/4227	111/17036	0.042496	0.415545	0.389793	apc/wdr18/dbf4b/rnf169/ercc2/dscc1/dbf4/fam168a/setdb1a/gmnn/spire1a/hnrnpub/hmbox1b/pou5f3/terf2ip/terf1/si:dkey-108k21.10/si:dkey-108k21.21/zgc:153405/si:ch211-113a14.24/dnmt1/e2f7/helb/tnksb/histh1l/h1m/si:dkey-23a13.9/si:dkey-23a13.17/si:ch73-368j24.11/si:ch73-368j24.12/si:ch1073-153i20.4/zgc:110425/e2f8/cdt1/zgc:163061/ercc8	36
GO:1901657	GO:1901657	glycosyl compound metabolic process	30/4227	90/17036	0.0428033	0.417266	0.391408	pnp4a/nme2a/adkb/adka/nt5c1ba/nme5/trmt12/nt5c1ab/gmps/fuca1.1/uck2b/tyw3/prtfdc1/pnp5b/ppat/cad/uck1/uckl1b/uprt/prps1a/ak4/gba2/aprt/dhodh/uck2a/ahcyl1/impdh2/umps/lcmt2/nme8	30
GO:0044843	GO:0044843	cell cycle G1/S phase transition	14/4227	36/17036	0.0433712	0.42151	0.395388	psme2/meis1b/trim71/ccne2/gpr132a/plk3/rb1/rbl2/e2f7/ccnd2b/cdkn1ba/anxa1a/anxa1b/usp37	14
GO:0007015	GO:0007015	actin filament organization	81/4227	275/17036	0.0439867	0.426189	0.399777	fscn1b/tmod1/si:ch211-176g13.8/dbnla/rac3b/baiap2l1a/cdc42ep1a/rhoq/cdc42ep4b/fmn2b/cfl1l/sorbs2b/diaph2/zgc:158689/tmod4/spire1b/cfl2/si:ch211-175f11.5/evla/sptb/vaspb/fhod3a/tpm3/spire1a/ppp1r9a/cap1/abi1b/myoc/rhov/arpc5b/shroom3/si:dkey-6b12.5/dbn1/limk1b/dpysl3/pfn2/zgc:114123/fmnl3/lima1a/msrb2/twf1a/mical2b/cdc42ep1b/coro7/limd2/rac3a/zgc:86896/fscn1a/baiap2a/kank2/fscn2a/baiap2l1b/waslb/m…	81
GO:0030004	GO:0030004	cellular monovalent inorganic cation homeostasis	20/4227	56/17036	0.0449928	0.433307	0.406454	atp1a1a.5/tcirg1a/slc4a5/ca15b/tcirg1b/atp1b3b/slc9a3.1/atp1b3a/atp1b2a/slc4a2b/si:ch73-173p19.2/atp6v0a1a/slc4a1a/rogdi/atp1b1a/slc9a7/slc4a8/slc26a6l/slc26a6/slc9a2	20
GO:0032880	GO:0032880	regulation of protein localization	37/4227	115/17036	0.0449941	0.433307	0.406454	gpc5a/arfip1/bora/rfx3/mtnr1bb/hmgb1a/tlr8b/tcf7l2/cep131/sar1ab/vip/gpc2/si:ch211-210b2.2/panx1a/hmgb1b/mtnr1ba/ica1/si:dkey-206p8.1/gas8/anxa13l/adcyap1b/tnfrsf21/rfx6/tlr5b/tlr5a/nkx6.1/plekhm2/hmgn3/syt9b/scamp5a/mief1/anxa1a/anxa1b/dzip1l/lgr4/ano1/zgc:153759	37
GO:0000281	GO:0000281	mitotic cytokinesis	13/4227	33/17036	0.045667	0.435449	0.408464	map9/apc/zfyve26/fbxo5/aurkb/snx9a/kif23/jtb/efhc1/rtkn2b/unc119b/snx33/cdt1	13
GO:0006820	GO:0006820	anion transport	90/4227	309/17036	0.0458182	0.435449	0.408464	atp11a/slc27a1b/slc25a1b/slc38a9/slc27a4/stard7/slc25a1a/pitpnab/slc4a5/slc4a10a/slc16a9b/slc16a12b/slc16a8/slc16a3/slc38a6/mfsd2aa/slc34a1a/abca1b/atp10b/slc7a3b/stard14/slc7a11/slc13a5b/pitpnaa/zgc:91890/ttyh1/atp8b2/slc4a7/clns1a/slc12a1/abcc5/slc52a2/si:dkeyp-120h9.1/lrrc8da/slc12a7a/slc6a9/slco5a1b/oc90/enpp1/slc10a4/vps18/slc10a1/gabrg2/atp8b3/si:ch211-117c9.2/clcnk/prelid1b/ankha/slc4a2b/b…	90
GO:0002790	GO:0002790	peptide secretion	29/4227	87/17036	0.0458295	0.435449	0.408464	arfip1/rfx3/mtnr1bb/hmgb1a/tlr8b/park7/tcf7l2/vip/panx1a/hmgb1b/mtnr1ba/ica1/wls/rab15/tnfrsf21/rfx6/tlr5b/tlr5a/mia3/nkx6.1/hmgn3/syt9b/scamp5a/rab3db/anxa1a/anxa1b/lgr4/ano1/zgc:153759	29
GO:0006338	GO:0006338	chromatin remodeling	29/4227	87/17036	0.0458295	0.435449	0.408464	smarcad1b/npm1a/hmgb1a/npm2b/pbrm1/top1l/chd5/zmiz1a/psme4a/hmgb1b/jarid2a/zgc:173742/arid1ab/jarid2b/kdm4ab/chd8/dpf3/hmgb3b/top1/smarca4a/smarca1/kdm4aa/si:dkey-148h10.5/pbrm1l/hmgb3a/npm2a/piwil1/actr5/satb2	29
GO:0045930	GO:0045930	negative regulation of mitotic cell cycle	31/4227	94/17036	0.0459017	0.435449	0.408464	btg3/eme1/fbxo5/aurkb/si:dkey-79d12.5/wnt4b/id2a/gpr132a/mcl1a/top2b/ints3/cdc14aa/plk3/dtl/rb1/siah2l/btg2/si:dkey-42i9.4/cdkn1cb/rbl2/e2f7/btg1/cdkn1ba/chek2/chfr/dlg1/brinp3a.1/brinp3a.2/stk33/cdc14b/rad9b	31
GO:0072657	GO:0072657	protein localization to membrane	56/4227	184/17036	0.0477984	0.448038	0.420272	blzf1/gpc5a/zgc:77880/vps37a/arl13b/timm10/golga7ba/si:dkey-27b3.2/musk/golga7/dlg2/zdhhc4/slc9a3r1a/gpc2/dlg3/zdhhc24/si:ch211-210b2.2/sec61b/srp14/ankrd9/si:dkey-206p8.1/zdhhc7/agk/zdhhc18b/si:ch211-188c16.1/anxa13l/sec62/rab15/pex3/tram2/efhc1/fybb/ank1b/pacs1a/rnf121/timm13/si:ch211-126j24.1/tm9sf4/tm9sf1/tram1/zdhhc23b/zdhhc20b/rab3db/arl5c/mief1/nsfa/samm50l/pigw/zgc:110329/dlg1/sec61a1/sec…	56
GO:0042398	GO:0042398	cellular modified amino acid biosynthetic process	12/4227	30/17036	0.0479367	0.448038	0.420272	slc27a1b/ckba/ptdss1a/mthfd1b/zgc:153031/ptdss1b/ckbb/mthfd1l/gss/mthfs/gclm/plod1a	12
GO:0060788	GO:0060788	ectodermal placode formation	12/4227	30/17036	0.0479367	0.448038	0.420272	tdgf1/sox9a/foxh1/pax2a/msx1a/bmper/fzd8a/axin1/sox9b/gata3/tfap2c/fgf3	12
GO:0043488	GO:0043488	regulation of mRNA stability	16/4227	43/17036	0.0480672	0.448038	0.420272	csdc2a/vip/dnd1/fmr1/hnrnpa0a/mettl16/zfp36l1a/syncripl/pabpc1b/rbm24a/zfp36l1b/hnrnpub/ncl/carhsp1/cth1/mettl3	16
GO:0051049	GO:0051049	regulation of transport	126/4227	445/17036	0.048159	0.448038	0.420272	arfip1/pkd2/rfx3/hvcn1/mtnr1bb/hmgb1a/tlr8b/rap1ab/rem1/wnk2/park7/scn4aa/tcf7l2/cep131/inpp5f/sar1ab/kcns3a/kcnh5b/vip/cplx2/si:ch211-210b2.2/panx1a/scn3b/hmgb1b/stim1a/kcnj13/mtnr1ba/kcnj14/si:dkey-201i6.2/scn1ba/zgc:162160/rims2a/fxyd1/ica1/lgals3b/kcnh1a/si:dkey-206p8.1/trpm7/hcn4/cplx3b/neto2b/kcng4a/mctp2a/bcl2l10/pid1/kcnj1a.6/kcnj1a.5/kcnj1a.1/kcnj5/scn1bb/cacng7a/shisa7b/rims3/anxa13l/ra…	126
GO:0032990	GO:0032990	cell part morphogenesis	122/4227	430/17036	0.0484986	0.448038	0.420272	en1b/crmp1/unc5c/apc/musk/dpysl2b/robo3/dbnla/srgap2/cdkl5/pcdh17/rac1a/dpysl4/supv3l1/zfyve26/fmr1/pcdh18b/rest/exosc3/ncam1b/alcamb/pitpnaa/nyap2a/sema6e/gdf6a/dpysl5a/hdc/nptnb/clns1a/pak1/sema3d/vaspb/rbm7/hnrnpr/ncaldb/top2b/sema4ab/pard6gb/tmem106bb/thsd7aa/si:ch211-241e1.3/ephb3a/usp33/ssbp3a/ptprfb/chd7/col15a1b/tnika/ptch2/tnr/map1sb/sema4e/cnr1/katna1/fzd3a/cad/notch1a/unc5da/nkx6.1/rb1…	122
GO:0005996	GO:0005996	monosaccharide metabolic process	26/4227	77/17036	0.0487302	0.448038	0.420272	man2b1/pfklb/dcxr/g6pc3/galk1/maea/gapdh/gapdhs/khk/gale/gpib/arpp19a/fuca1.1/pask/pfkpb/ppp1r3b/pcxa/pofut1/fam3a/pfkfb1/pfkma/pfkpa/zgc:153343/fam3c/pfkmb/pcxb	26
GO:0061564	GO:0061564	axon development	114/4227	400/17036	0.0490529	0.448038	0.420272	en1b/crmp1/unc5c/apc/musk/dpysl2b/robo3/hmgb1a/dbnla/cdkl5/pcdh17/rac1a/zfyve26/rest/exosc3/ncam1b/alcamb/pitpnaa/sema6e/gdf6a/ptena/dpysl5a/hdc/nptnb/clns1a/pak1/sema3d/rgma/b3gat1a/vaspb/rbm7/hnrnpr/ncaldb/top2b/sema4ab/pard6gb/thsd7aa/si:ch211-241e1.3/ephb3a/usp33/ssbp3a/ptprfb/col15a1b/ptch2/tnr/map1sb/sema4e/cnr1/katna1/fzd3a/notch1a/unc5da/nefma/nkx6.1/rb1/ncam1a/nrxn2a/arl3l1/dbn1/dpysl3/t…	114
GO:0046530	GO:0046530	photoreceptor cell differentiation	30/4227	91/17036	0.0491489	0.448038	0.420272	arl13b/apc/pcdh17/kif17/ninl/gucy2f/bves/gdf6a/ahi1/id2a/ehmt2/znf644a/ift57/rp1l1b/sox11b/insm1a/rx1/dzank1/cc2d2a/dnmt3bb.2/pax6a/cdipt/ttc26/rp2/vangl2/six7/adipor1b/dlx1a/cerkl/neurod1	30
GO:0042391	GO:0042391	regulation of membrane potential	46/4227	148/17036	0.0491666	0.448038	0.420272	gabrr3a/trpm4b.1/scn4aa/gabrb1/kcnk1b/kcnh5b/si:ch211-261a10.5/scn3b/popdc3/bves/scn1ba/rims2a/kcnk10b/chrna2a/kcnh1a/kcnk6/pid1/chrnb4/chrna3/scn1bb/grin2da/rims3/prrx1a/slc6a9/scn12aa/kcnk2b/gabrr2b/kcnk5b/kcnt1/gabrg2/rnf121/kcnh1b/snx16/scn4ab/grin2aa/kcnh6a/trpm4a/cacna1ha/scn1lab/kcnh7/atp1b1a/chrna7/piezo1/gabrd/slc4a3/glra2	46
GO:0048705	GO:0048705	skeletal system morphogenesis	66/4227	221/17036	0.0493326	0.448038	0.420272	ptpn11a/auts2a/mef2ca/rargb/rap1ab/ece1/chd5/ep300a/nolc1/meis1b/loxl3b/polr1c/matn3b/jag1b/runx3/lbh/polr1a/pitx2/anxa6/macc1/itga8/wdr43/meis2a/pak1/sema3d/hoxa4a/hoxa3a/rit1/dlx5a/tinagl1/rbm24a/wls/chd7/pkn2/si:ch211-106n13.3/mmachc/ahsa1a/specc1lb/prdm5/ptpn11b/itga5/hoxc3a/hoxc4a/vwa1/smarca4a/hoxb3a/hoxb4a/xylt1/rarab/fscn1a/cacna1c/gata3/tbx1/foxd3/col7a1/matn4/fgf3/notch2/tp73/hoxd3a/hox…	66
GO:0007009	GO:0007009	plasma membrane organization	21/4227	60/17036	0.0500979	0.448038	0.420272	baiap2l1a/anxa6/zgc:158689/ndrg1b/ndrg1a/zgc:123035/arv1/pacsin1a/plekhm2/bin2a/si:ch73-206p6.1/cavin4b/cav2/cav1/baiap2a/baiap2l1b/ano6/bin2b/dysf/plscr3b/ano9b	21
GO:0007254	GO:0007254	JNK cascade	15/4227	40/17036	0.0511214	0.448038	0.420272	mapk8ip2/dusp22a/dusp22b/ripk1l/ripk2/ankrd6b/sh3rf1/map3k7/mapk10/csrp1a/magi3a/mapk8ip1a/mapk8ip3/axin1/map3k12	15
GO:0030490	GO:0030490	maturation of SSU-rRNA	15/4227	40/17036	0.0511214	0.448038	0.420272	pwp2h/fbxw11b/heatr1/dcaf13/nol10/srfbp1/riok1/ddx52/fam207a/rrs1/tbl3/nol11/dhx37/tsr2/abt1	15
GO:0090068	GO:0090068	positive regulation of cell cycle process	15/4227	40/17036	0.0511214	0.448038	0.420272	pmaip1/dbf4b/si:ch1073-266p11.2/aurkb/dbf4/cdc14aa/ppp1r7/anapc4/hnrnpub/e2f7/ccnd2b/anxa1a/anxa1b/e2f8/cdc14b	15
GO:0048840	GO:0048840	otolith development	18/4227	50/17036	0.0513811	0.448038	0.420272	ptenb/tectb/dcdc2b/jag1b/sparc/ptena/gas8/slc44a4/chd7/oc90/lrrc23/sox10/ttc25/hsp90b1/tecta/vangl2/fgf3/rhoab	18
GO:0007422	GO:0007422	peripheral nervous system development	23/4227	67/17036	0.0514277	0.448038	0.420272	dock1/pax2a/bace1/ndrg1b/sema3d/ndrg1a/ssbp3a/chd7/adgrg6/notch1a/nrg2a/dpysl3/ngfa/sox10/nsfa/gdnfb/rtn4r/notch1b/gfi1ab/foxd3/fgf3/gle1/ccdc141	23
GO:0035148	GO:0035148	tube formation	23/4227	67/17036	0.0514277	0.448038	0.420272	tdgf1/dvl1b/sox9a/pax2a/nin/msx1a/sparc/pcdh19/bmper/phactr4b/pard6a/vaspb/pard6gb/adgrg6/shroom3/sox9b/gata3/tfap2c/vangl2/mdka/cdh1/fgf3/zic2a	23
GO:0006144	GO:0006144	purine nucleobase metabolic process	10/4227	24/17036	0.0520768	0.448038	0.420272	gart/xdh/mthfd1b/uraha/prtfdc1/ppat/mthfd1l/shmt1/gmpr2/aprt	10
GO:0016180	GO:0016180	snRNA processing	10/4227	24/17036	0.0520768	0.448038	0.420272	exosc9/ints2/ints10/ints5/exosc3/exosc7/exosc4/ints7/exosc2/ints6	10
GO:0042446	GO:0042446	hormone biosynthetic process	10/4227	24/17036	0.0520768	0.448038	0.420272	rdh8b/cyp11c1/cyp19a1a/slc44a4/cyp17a2/cyp11a2/cyp11a1/hsd17b12a/fdx1b/hsd17b12b	10
GO:0048599	GO:0048599	oocyte development	10/4227	24/17036	0.0520768	0.448038	0.420272	nanos3/smad2/zfyve26/paqr7b/buc/gsdf/pde3a/ccnb1/mettl3/bmp15	10
GO:0001556	GO:0001556	oocyte maturation	6/4227	12/17036	0.0525498	0.448038	0.420272	paqr7b/gsdf/pde3a/ccnb1/mettl3/bmp15	6
GO:0002698	GO:0002698	negative regulation of immune effector process	6/4227	12/17036	0.0525498	0.448038	0.420272	loxl3b/loxl3a/gpatch3/anxa1a/anxa1b/serping1	6
GO:0006828	GO:0006828	manganese ion transport	6/4227	12/17036	0.0525498	0.448038	0.420272	atp2c1/trpc6b/trpc2b/trpc5b/trpc1/slc25a39	6
GO:0019368	GO:0019368	fatty acid elongation, unsaturated fatty acid	6/4227	12/17036	0.0525498	0.448038	0.420272	elovl6l/elovl1a/elovl4b/elovl7a/elovl8b/elovl7b	6
GO:0021884	GO:0021884	forebrain neuron development	6/4227	12/17036	0.0525498	0.448038	0.420272	lhx6/auts2a/prox1a/lhx8a/otpa/nr4a2b	6
GO:0034625	GO:0034625	fatty acid elongation, monounsaturated fatty acid	6/4227	12/17036	0.0525498	0.448038	0.420272	elovl6l/elovl1a/elovl4b/elovl7a/elovl8b/elovl7b	6
GO:0034626	GO:0034626	fatty acid elongation, polyunsaturated fatty acid	6/4227	12/17036	0.0525498	0.448038	0.420272	elovl6l/elovl1a/elovl4b/elovl7a/elovl8b/elovl7b	6
GO:0042135	GO:0042135	neurotransmitter catabolic process	6/4227	12/17036	0.0525498	0.448038	0.420272	comtb/aldh5a1/gldc/ache/amt/hnmt	6
GO:0071711	GO:0071711	basement membrane organization	6/4227	12/17036	0.0525498	0.448038	0.420272	hmcn1/lamb2/lamb4/ntn4/col4a6/col4a5	6
GO:0097475	GO:0097475	motor neuron migration	6/4227	12/17036	0.0525498	0.448038	0.420272	rest/mdga2a/nhsl1a/dab1b/prickle1b/vangl2	6
GO:0046467	GO:0046467	membrane lipid biosynthetic process	27/4227	81/17036	0.0525976	0.448038	0.420272	pigo/smpd1/degs1/elovl6l/st3gal5/gal3st2/pigv/cers3b/st3gal4/cers2a/elovl1a/st6galnac6/smpd4/pgap2/pigs/cers1/cers5/elovl4b/mppe1/pign/pigm/pigw/gal3st3/elovl7a/elovl8b/piga/elovl7b	27
GO:0048812	GO:0048812	neuron projection morphogenesis	120/4227	424/17036	0.0532589	0.448038	0.420272	en1b/crmp1/unc5c/apc/musk/dpysl2b/robo3/dbnla/srgap2/cdkl5/pcdh17/rac1a/dpysl4/zfyve26/fmr1/pcdh18b/rest/exosc3/ncam1b/alcamb/pitpnaa/nyap2a/sema6e/gdf6a/dpysl5a/hdc/nptnb/clns1a/pak1/sema3d/vaspb/rbm7/hnrnpr/ncaldb/top2b/sema4ab/pard6gb/tmem106bb/thsd7aa/si:ch211-241e1.3/ephb3a/usp33/ssbp3a/ptprfb/chd7/col15a1b/tnika/ptch2/tnr/map1sb/sema4e/cnr1/katna1/fzd3a/cad/notch1a/unc5da/nkx6.1/rb1/ncam1a/…	120
GO:0048858	GO:0048858	cell projection morphogenesis	120/4227	424/17036	0.0532589	0.448038	0.420272	en1b/crmp1/unc5c/apc/musk/dpysl2b/robo3/dbnla/srgap2/cdkl5/pcdh17/rac1a/dpysl4/zfyve26/fmr1/pcdh18b/rest/exosc3/ncam1b/alcamb/pitpnaa/nyap2a/sema6e/gdf6a/dpysl5a/hdc/nptnb/clns1a/pak1/sema3d/vaspb/rbm7/hnrnpr/ncaldb/top2b/sema4ab/pard6gb/tmem106bb/thsd7aa/si:ch211-241e1.3/ephb3a/usp33/ssbp3a/ptprfb/chd7/col15a1b/tnika/ptch2/tnr/map1sb/sema4e/cnr1/katna1/fzd3a/cad/notch1a/unc5da/nkx6.1/rb1/ncam1a/…	120
GO:0120039	GO:0120039	plasma membrane bounded cell projection morphogenesis	120/4227	424/17036	0.0532589	0.448038	0.420272	en1b/crmp1/unc5c/apc/musk/dpysl2b/robo3/dbnla/srgap2/cdkl5/pcdh17/rac1a/dpysl4/zfyve26/fmr1/pcdh18b/rest/exosc3/ncam1b/alcamb/pitpnaa/nyap2a/sema6e/gdf6a/dpysl5a/hdc/nptnb/clns1a/pak1/sema3d/vaspb/rbm7/hnrnpr/ncaldb/top2b/sema4ab/pard6gb/tmem106bb/thsd7aa/si:ch211-241e1.3/ephb3a/usp33/ssbp3a/ptprfb/chd7/col15a1b/tnika/ptch2/tnr/map1sb/sema4e/cnr1/katna1/fzd3a/cad/notch1a/unc5da/nkx6.1/rb1/ncam1a/…	120
GO:0007520	GO:0007520	myoblast fusion	9/4227	21/17036	0.0536704	0.448038	0.420272	mapk14b/rac1a/myof/dock1/kirrel3l/pgam2/jam3b/myf6/mapk14a	9
GO:0070838	GO:0070838	divalent metal ion transport	54/4227	178/17036	0.0539723	0.448038	0.420272	slc24a2/fam155a/si:dkey-28b4.8/pkd2/trpc4a/ryr1a/rem1/slc8a1a/slc39a11/letm1/slc8a3/stim1a/trpc2a/atp2c1/lgals3b/trpm7/slc30a4/si:ch211-260p9.3/itpr2/bcl2l10/trpc6b/trpn1/cacng7a/slc39a7/slc39a6/p2rx4a/atp2a2b/slc8a4a/trpc2b/trpc5b/cacna1sa/trpc1/atp2b1b/cacnb1/atp2a1/cacna1aa/cacna1ha/cacng1b/cacng4b/cax1/cacna1c/cacna1ba/nipa1/slc39a13/trpm5/tpcn2/atp2a2a/itpr3/cacna1sb/orai1a/bcl2l16/gpr161/ca…	54
GO:0072511	GO:0072511	divalent inorganic cation transport	54/4227	178/17036	0.0539723	0.448038	0.420272	slc24a2/fam155a/si:dkey-28b4.8/pkd2/trpc4a/ryr1a/rem1/slc8a1a/slc39a11/letm1/slc8a3/stim1a/trpc2a/atp2c1/lgals3b/trpm7/slc30a4/si:ch211-260p9.3/itpr2/bcl2l10/trpc6b/trpn1/cacng7a/slc39a7/slc39a6/p2rx4a/atp2a2b/slc8a4a/trpc2b/trpc5b/cacna1sa/trpc1/atp2b1b/cacnb1/atp2a1/cacna1aa/cacna1ha/cacng1b/cacng4b/cax1/cacna1c/cacna1ba/nipa1/slc39a13/trpm5/tpcn2/atp2a2a/itpr3/cacna1sb/orai1a/bcl2l16/gpr161/ca…	54
GO:0097485	GO:0097485	neuron projection guidance	73/4227	248/17036	0.0541053	0.448038	0.420272	crmp1/unc5c/apc/musk/dpysl2b/robo3/pcdh17/rac1a/dpysl4/rest/ncam1b/alcamb/sema6e/gdf6a/dpysl5a/hdc/nptnb/sema3d/vaspb/hnrnpr/ncaldb/top2b/sema4ab/si:ch211-241e1.3/ephb3a/usp33/ptprfb/col15a1b/ptch2/tnr/sema4e/fzd3a/unc5da/rb1/nrxn2a/arl3l1/dpysl3/si:ch211-129c21.1/slit1b/ephb2a/nrp1a/sema5a/ek1/ntng1a/ntn2/nptna/isl2a/kcnc3a/dpysl5b/e2f7/plxnb2a/plxnc1/lrrc17/lrtm2a/sema3c/rtn4r/plxna1b/sema5bb/d…	73
GO:0008064	GO:0008064	regulation of actin polymerization or depolymerization	36/4227	113/17036	0.054241	0.448038	0.420272	tmod1/si:ch211-176g13.8/dbnla/rac3b/baiap2l1a/cdc42ep1a/cdc42ep4b/fmn2b/zgc:158689/tmod4/spire1b/si:ch211-175f11.5/evla/sptb/vaspb/spire1a/arpc5b/dbn1/pfn2/zgc:114123/twf1a/cdc42ep1b/rac3a/zgc:86896/baiap2a/kank2/baiap2l1b/waslb/add2/kank1b/cdc42ep2/si:dkey-40c11.2/kank1a/gsnb/zgc:101810/kank3	36
GO:0030832	GO:0030832	regulation of actin filament length	36/4227	113/17036	0.054241	0.448038	0.420272	tmod1/si:ch211-176g13.8/dbnla/rac3b/baiap2l1a/cdc42ep1a/cdc42ep4b/fmn2b/zgc:158689/tmod4/spire1b/si:ch211-175f11.5/evla/sptb/vaspb/spire1a/arpc5b/dbn1/pfn2/zgc:114123/twf1a/cdc42ep1b/rac3a/zgc:86896/baiap2a/kank2/baiap2l1b/waslb/add2/kank1b/cdc42ep2/si:dkey-40c11.2/kank1a/gsnb/zgc:101810/kank3	36
GO:0046148	GO:0046148	pigment biosynthetic process	14/4227	37/17036	0.0543235	0.448038	0.420272	gart/hmbsb/mthfd1b/slc24a5/iba57/prtfdc1/ppat/mthfd1l/tmem14ca/slc25a39/shmt1/alad/aprt/cpox	14
GO:0008354	GO:0008354	germ cell migration	7/4227	15/17036	0.0544985	0.448038	0.420272	tdgf1/ca15b/rgs14a/dnd1/cdh1/grip2a/kdm6a	7
GO:0010675	GO:0010675	regulation of cellular carbohydrate metabolic process	7/4227	15/17036	0.0544985	0.448038	0.420272	maea/khk/arpp19a/pask/ppp1r3b/fam3a/fam3c	7
GO:0022011	GO:0022011	myelination in peripheral nervous system	7/4227	15/17036	0.0544985	0.448038	0.420272	dock1/bace1/ndrg1b/ndrg1a/chd7/adgrg6/sox10	7
GO:0043174	GO:0043174	nucleoside salvage	7/4227	15/17036	0.0544985	0.448038	0.420272	adkb/adka/uck2b/prtfdc1/uck1/uckl1b/uck2a	7
GO:1903672	GO:1903672	positive regulation of sprouting angiogenesis	7/4227	15/17036	0.0544985	0.448038	0.420272	syk/jcada/itgb1a/nrp1a/anxa1a/anxa1b/ptger3	7
GO:0006109	GO:0006109	regulation of carbohydrate metabolic process	8/4227	18/17036	0.0546234	0.448038	0.420272	maea/khk/arpp19a/pask/ppp1r3b/fam3a/fam3c/scn1lab	8
GO:0009208	GO:0009208	pyrimidine ribonucleoside triphosphate metabolic process	8/4227	18/17036	0.0546234	0.448038	0.420272	nme2a/nme5/uck2b/cad/uck1/uckl1b/uck2a/nme8	8
GO:0009209	GO:0009209	pyrimidine ribonucleoside triphosphate biosynthetic process	8/4227	18/17036	0.0546234	0.448038	0.420272	nme2a/nme5/uck2b/cad/uck1/uckl1b/uck2a/nme8	8
GO:0048515	GO:0048515	spermatid differentiation	8/4227	18/17036	0.0546234	0.448038	0.420272	psme4a/nme5/iqcg/spaca4l/amh/abhd2b/sycp3/piwil1	8
GO:0043487	GO:0043487	regulation of RNA stability	17/4227	47/17036	0.0549136	0.448038	0.420272	heatr1/csdc2a/vip/dnd1/fmr1/hnrnpa0a/mettl16/zfp36l1a/syncripl/pabpc1b/rbm24a/zfp36l1b/hnrnpub/ncl/carhsp1/cth1/mettl3	17
GO:0019725	GO:0019725	cellular homeostasis	109/4227	383/17036	0.055062	0.448038	0.420272	atp1a1a.5/pdia2/slc24a2/fam155a/si:dkey-28b4.8/tcirg1a/pkd2/nxnl2/auts2a/ryr1a/slc4a5/slc8a1a/ca15b/letm1/slc34a1a/lpar4/abcb7/tcirg1b/pde6a/anxa6/atp1b3b/gpr4/stim1a/gpr55a/fbxo32/atp2c1/ptger2a/trpm7/clns1a/slc12a1/slc30a4/si:ch211-260p9.3/itpr2/herpud1/bcl2l10/trpc6b/slc9a3.1/slc39a7/prdx1/txndc12/atp1b3a/slc12a7a/agtr1a/ackr4a/opn4.1/slc39a6/scara5/glrx5/prdx6/pdia6/rfx6/f2rl1.2/f2rl1.1/zgc:1…	109
GO:0000041	GO:0000041	transition metal ion transport	22/4227	64/17036	0.0551236	0.448038	0.420272	slc39a11/hephl1a/si:ch211-254p10.2/atp2c1/slc30a4/trpc6b/slc39a7/slc39a6/scara5/trpc2b/trpc5b/cp/trpc1/zgc:56095/steap2/fth1b/slc25a39/si:dkey-16p21.8/slc39a13/steap3/cox17/slc39a3	22
GO:0006694	GO:0006694	steroid biosynthetic process	22/4227	64/17036	0.0551236	0.448038	0.420272	msmo1/rdh8b/tm7sf2/nsdhl/cyp11c1/cyp19a1a/cyp51/srd5a1/hsd3b2/ch25hl2/faxdc2/cyb5r2/cyp11a2/cyp11a1/hsd17b12a/zgc:101540/mvk/fdx1b/hsd17b7/hsd17b12b/star/hsd3b1	22
GO:0098659	GO:0098659	inorganic cation import across plasma membrane	24/4227	71/17036	0.055988	0.452748	0.42469	atp1a1a.5/fam155a/atp1b3b/kcnj13/kcnj14/zgc:162160/slc12a1/kcnj1a.6/kcnj1a.5/kcnj1a.1/kcnj5/slc9a3.1/atp1b3a/slc12a7a/slc39a6/atp1b2a/kcnj11l/kcnj3b/atp1b1a/slc9a7/slc12a10.2/slc12a10.3/slc9a2/slc12a8	24
GO:0099587	GO:0099587	inorganic ion import across plasma membrane	24/4227	71/17036	0.055988	0.452748	0.42469	atp1a1a.5/fam155a/atp1b3b/kcnj13/kcnj14/zgc:162160/slc12a1/kcnj1a.6/kcnj1a.5/kcnj1a.1/kcnj5/slc9a3.1/atp1b3a/slc12a7a/slc39a6/atp1b2a/kcnj11l/kcnj3b/atp1b1a/slc9a7/slc12a10.2/slc12a10.3/slc9a2/slc12a8	24
GO:0006665	GO:0006665	sphingolipid metabolic process	26/4227	78/17036	0.0563821	0.454777	0.426594	smpd1/si:ch73-267c23.10/degs1/elovl6l/st3gal5/gm2a/aldh5a1/galcb/cers3b/cers2a/elovl1a/arv1/galca/st6galnac6/smpd4/neu3.2/cers1/cers5/elovl4b/pdxdc1/serinc5/gba2/acer2/elovl7a/elovl8b/elovl7b	26
GO:0048704	GO:0048704	embryonic skeletal system morphogenesis	53/4227	175/17036	0.0573537	0.461238	0.432654	ptpn11a/auts2a/rap1ab/ece1/chd5/ep300a/nolc1/meis1b/loxl3b/polr1c/runx3/lbh/polr1a/pitx2/macc1/itga8/wdr43/meis2a/pak1/sema3d/hoxa4a/hoxa3a/rit1/dlx5a/tinagl1/rbm24a/wls/chd7/pkn2/mmachc/ahsa1a/prdm5/ptpn11b/itga5/hoxc3a/hoxc4a/smarca4a/hoxb3a/hoxb4a/xylt1/fscn1a/cacna1c/gata3/tbx1/fgf3/tp73/hoxd3a/hoxd4a/dlx1a/zic2a/kdm6a/med14/dhrs9	53
GO:1990573	GO:1990573	potassium ion import across plasma membrane	19/4227	54/17036	0.0574733	0.461238	0.432654	atp1a1a.5/atp1b3b/kcnj13/kcnj14/zgc:162160/slc12a1/kcnj1a.6/kcnj1a.5/kcnj1a.1/kcnj5/atp1b3a/slc12a7a/atp1b2a/kcnj11l/kcnj3b/atp1b1a/slc12a10.2/slc12a10.3/slc12a8	19
GO:0044262	GO:0044262	cellular carbohydrate metabolic process	35/4227	110/17036	0.0579985	0.46428	0.435508	slc5a3a/ugp2a/dgat2/phka2/ptenb/pgp/phkg2/galk1/pygl/maea/ext1a/khk/ptena/b3gnt2b/has3/arpp19a/treh/ext1b/extl2/gyg1a/pask/ppp1r3b/pygma/phka1b/ippk/b3gnt7/fam3a/impa2/gyg1b/gys2/fam3c/inpp5jb/pygmb/inpp5l/zgc:77112	35
GO:0001822	GO:0001822	kidney development	54/4227	179/17036	0.0591694	0.472464	0.443184	fat1a/pkd2/tdgf1/ift46/slc41a1/plce1/pkd1b/camk2g1/pax2a/osr1/dcdc2b/tmem234/klhl3/nek8/kirrel3l/myo1eb/osr2/ptger2a/pard6gb/thsd7aa/ptgs2a/cdh6/lrrc6/ezrb/ift172/shroom3/nphs2/wwtr1/sulf1/sept15/irx3b/glis2b/kank2/cacna1c/gdnfb/myo1ca/vcana/inpp5e/ap1m2/ttc26/myh9a/usp40/etv5b/ccdc40/rp2/sec61a1/vhl/p4htm/sec61a1l/kcnj10a/epoa/dnaaf1/ift81/epb41l5	54
GO:0021915	GO:0021915	neural tube development	31/4227	96/17036	0.0596153	0.473643	0.444291	arl13b/dla/apc/tdgf1/dvl1b/foxh1/pax2a/nin/fmr1/pcdh19/rest/trim71/phactr4b/pard6a/vaspb/foxa3/pard6gb/wls/rnf152/en2b/shroom3/pou5f3/wnt10b/wnt1/rarab/vangl2/slc7a6os/mdka/cdh1/zic2a/gpr161	31
GO:0046434	GO:0046434	organophosphate catabolic process	31/4227	96/17036	0.0596153	0.473643	0.444291	pgam1b/smpd1/pfklb/ptenb/enpp2/gapdh/gpd1l/gapdhs/eno4/ptena/gpib/pkma/pfkpb/nt5e/enpp1/smpd4/pgam2/gpd1b/pfkma/eno3/impa2/pfkpa/pkmb/cnp/gdpd3a/inpp5jb/scn1lab/pfkmb/nudt12/inpp5l/pfkla	31
GO:0032273	GO:0032273	positive regulation of protein polymerization	23/4227	68/17036	0.0600536	0.475936	0.446441	rac3b/baiap2l1a/cdc42ep1a/cdc42ep4b/fmn2b/zgc:158689/spire1b/evla/vaspb/spire1a/arpc5b/zgc:114123/terf1/cyp11a1/cdc42ep1b/rac3a/zgc:86896/baiap2a/baiap2l1b/waslb/cdc42ep2/gsnb/zgc:101810	23
GO:0006816	GO:0006816	calcium ion transport	46/4227	150/17036	0.0602853	0.476584	0.447049	slc24a2/fam155a/si:dkey-28b4.8/pkd2/trpc4a/ryr1a/rem1/slc8a1a/letm1/slc8a3/stim1a/trpc2a/atp2c1/lgals3b/si:ch211-260p9.3/itpr2/bcl2l10/trpc6b/trpn1/cacng7a/p2rx4a/atp2a2b/slc8a4a/trpc2b/trpc5b/cacna1sa/trpc1/atp2b1b/cacnb1/atp2a1/cacna1aa/cacna1ha/cacng1b/cacng4b/cax1/cacna1c/cacna1ba/trpm5/tpcn2/atp2a2a/itpr3/cacna1sb/orai1a/bcl2l16/gpr161/cacnb4a	46
GO:0072524	GO:0072524	pyridine-containing compound metabolic process	25/4227	75/17036	0.0604659	0.476826	0.447276	mdh1b/pgam1b/pfklb/gapdh/gapdhs/eno4/gpib/pkma/nnt2/si:dkey-145c18.3/si:dkey-145c18.2/pfkpb/pgam2/nadk2/gpd1b/pfkma/nmnat1/eno3/pfkpa/pkmb/scn1lab/pfkmb/nudt12/ido1/pfkla	25
GO:0006259	GO:0006259	DNA metabolic process	133/4227	476/17036	0.0619983	0.487699	0.457476	tet2/lig4/poll/ssrp1b/rad23aa/apc/smarcad1b/hmgb1a/cry5/dnase2b/wdr18/top1l/park7/dbf4b/pms2/meiob/ercc4/eme1/dclre1a/ap5s1/supv3l1/mcmbp/ercc6/zfyve26/psme4a/cetn2/prpf19/neil3/rnf169/pnkp/ercc2/hmgb1b/gmnc/msh5/dscc1/dbf4/dnmt3ab/mta1/msh4/orc3/fam168a/zgc:173742/ddb2/setdb1a/eepd1/top2b/ints3/tdp2b/gmnn/spire1a/rad21b/rrm2/pif1/hfm1/si:ch73-382f3.1/paxip1/mbd3a/mei4/dtl/mcm3/hnrnpub/hmbox1b/re…	133
GO:0110053	GO:0110053	regulation of actin filament organization	39/4227	125/17036	0.0624372	0.489939	0.459577	tmod1/si:ch211-176g13.8/dbnla/rac3b/baiap2l1a/cdc42ep1a/cdc42ep4b/fmn2b/zgc:158689/tmod4/spire1b/si:ch211-175f11.5/evla/sptb/vaspb/spire1a/myoc/arpc5b/dbn1/limk1b/pfn2/zgc:114123/twf1a/cdc42ep1b/rac3a/zgc:86896/baiap2a/kank2/baiap2l1b/waslb/add2/kank1b/cdc42ep2/si:dkey-40c11.2/kank1a/gsnb/zgc:101810/fhod1/kank3	39
GO:0030641	GO:0030641	regulation of cellular pH	15/4227	41/17036	0.062723	0.49097	0.460543	tcirg1a/slc4a5/ca15b/tcirg1b/slc9a3.1/slc4a2b/si:ch73-173p19.2/atp6v0a1a/slc4a1a/rogdi/slc9a7/slc4a8/slc26a6l/slc26a6/slc9a2	15
GO:0000462	GO:0000462	maturation of SSU-rRNA from tricistronic rRNA transcript (SSU-rRNA, 5.8S rRNA, LSU-rRNA)	11/4227	28/17036	0.0646086	0.503924	0.472695	pwp2h/fbxw11b/heatr1/dcaf13/nol10/fam207a/rrs1/tbl3/dhx37/tsr2/abt1	11
GO:0072001	GO:0072001	renal system development	54/4227	180/17036	0.0647249	0.503924	0.472695	fat1a/pkd2/tdgf1/ift46/slc41a1/plce1/pkd1b/camk2g1/pax2a/osr1/dcdc2b/tmem234/klhl3/nek8/kirrel3l/myo1eb/osr2/ptger2a/pard6gb/thsd7aa/ptgs2a/cdh6/lrrc6/ezrb/ift172/shroom3/nphs2/wwtr1/sulf1/sept15/irx3b/glis2b/kank2/cacna1c/gdnfb/myo1ca/vcana/inpp5e/ap1m2/ttc26/myh9a/usp40/etv5b/ccdc40/rp2/sec61a1/vhl/p4htm/sec61a1l/kcnj10a/epoa/dnaaf1/ift81/epb41l5	54
GO:0055067	GO:0055067	monovalent inorganic cation homeostasis	26/4227	79/17036	0.0648536	0.503924	0.472695	atp1a1a.5/tcirg1a/slc4a5/ca15b/slc9a3r1a/tcirg1b/atp1b3b/slc12a1/slc9a3.1/atp1b3a/slc12a7a/atp1b2a/slc4a2b/si:ch73-173p19.2/atp6v0a1a/slc4a1a/rogdi/atp1b1a/slc9a7/slc4a8/slc26a6l/slc12a10.2/slc12a10.3/slc26a6/slc9a2/slc12a8	26
GO:0007411	GO:0007411	axon guidance	72/4227	247/17036	0.0666033	0.509212	0.477655	crmp1/unc5c/apc/musk/dpysl2b/robo3/pcdh17/rac1a/rest/ncam1b/alcamb/sema6e/gdf6a/dpysl5a/hdc/nptnb/sema3d/vaspb/hnrnpr/ncaldb/top2b/sema4ab/si:ch211-241e1.3/ephb3a/usp33/ptprfb/col15a1b/ptch2/tnr/sema4e/fzd3a/unc5da/rb1/nrxn2a/arl3l1/dpysl3/si:ch211-129c21.1/slit1b/ephb2a/nrp1a/sema5a/ek1/ntng1a/ntn2/nptna/isl2a/kcnc3a/dpysl5b/e2f7/plxnb2a/plxnc1/lrrc17/lrtm2a/sema3c/rtn4r/plxna1b/sema5bb/dzip1/et…	72
GO:0002040	GO:0002040	sprouting angiogenesis	38/4227	122/17036	0.0666656	0.509212	0.477655	syk/fbxw11b/jcada/gng2/fbxw11a/rspo3/foxf1/thsd7aa/tinagl1/scg2b/arhgap18/kdr/sox11b/tnfrsf21/adgrg6/nus1/hlx1/ccbe1/slc2a1a/fmnl3/itga5/itgb1a/nrp1a/lgals2a/jmjd6/ano6/e2f7/vegfab/plxnb2a/anxa1a/anxa1b/plxna1b/bmpr2a/ptger3/slc2a1b/e2f8/wars2/efnb2a	38
GO:0032956	GO:0032956	regulation of actin cytoskeleton organization	52/4227	173/17036	0.0667523	0.509212	0.477655	tmod1/si:ch211-176g13.8/dbnla/ect2/rac3b/baiap2l1a/mlst8/cdc42ep1a/rhoq/cdc42ep4b/fmn2b/zgc:158689/tmod4/spire1b/ptk2ba/si:ch211-175f11.5/evla/smyd2a/sptb/vaspb/spire1a/rbm24a/myoc/rhov/arpc5b/si:dkey-6b12.5/dbn1/limk1b/pfn2/zgc:114123/ek1/twf1a/cdc42ep1b/arhgap17b/rac3a/zgc:86896/baiap2a/kank2/baiap2l1b/waslb/add2/kank1b/rhogc/cdc42ep2/si:dkey-40c11.2/kank1a/gsnb/ccdc88aa/zgc:101810/fhod1/rhoab/…	52
GO:0048596	GO:0048596	embryonic camera-type eye morphogenesis	14/4227	38/17036	0.0670237	0.509212	0.477655	tdgf1/foxh1/six3b/znf503/pax2a/pitx2/sox4b/phactr4b/sox11b/fzd8a/smarca4a/six7/vax2/efnb2a	14
GO:0051262	GO:0051262	protein tetramerization	14/4227	38/17036	0.0670237	0.509212	0.477655	pkd2/pfklb/usp16/evla/trpm7/pfkpb/pfkma/pfkpa/shmt1/trpm6/pfkmb/shmt2/trpm1a/tp73	14
GO:0072528	GO:0072528	pyrimidine-containing compound biosynthetic process	14/4227	38/17036	0.0670237	0.509212	0.477655	dctd/tamm41/nme2a/nme5/cmpk2/uck2b/cad/uck1/uckl1b/dhodh/uck2a/umps/cps1/nme8	14
GO:0042274	GO:0042274	ribosomal small subunit biogenesis	19/4227	55/17036	0.0680733	0.509212	0.477655	pwp2h/ltv1/fbxw11b/heatr1/dcaf13/nol10/srfbp1/riok1/ddx52/fam207a/rrs1/rrp7a/mrps7/tbl3/surf6/nol11/dhx37/tsr2/abt1	19
GO:0003206	GO:0003206	cardiac chamber morphogenesis	10/4227	25/17036	0.0681006	0.509212	0.477655	ids/cadm4/klf2b/meis2b/adgrg6/nrg2a/wwtr1/ltbp3/nr2f1a/mybpc3	10
GO:0009994	GO:0009994	oocyte differentiation	10/4227	25/17036	0.0681006	0.509212	0.477655	nanos3/smad2/zfyve26/paqr7b/buc/gsdf/pde3a/ccnb1/mettl3/bmp15	10
GO:0021872	GO:0021872	forebrain generation of neurons	10/4227	25/17036	0.0681006	0.509212	0.477655	lef1/lhx6/auts2a/prox1a/lhx8a/otpa/fzd8a/axin1/nr4a2b/mettl3	10
GO:0032874	GO:0032874	positive regulation of stress-activated MAPK cascade	10/4227	25/17036	0.0681006	0.509212	0.477655	dusp22a/dusp22b/ripk1l/ripk2/ankrd6b/sh3rf1/mapk8ip3/axin1/klhdc10/map3k12	10
GO:0046131	GO:0046131	pyrimidine ribonucleoside metabolic process	10/4227	25/17036	0.0681006	0.509212	0.477655	nme2a/nme5/uck2b/cad/uck1/uckl1b/dhodh/uck2a/umps/nme8	10
GO:0050982	GO:0050982	detection of mechanical stimulus	10/4227	25/17036	0.0681006	0.509212	0.477655	pkd2/lhfpl5a/pkd1b/myo7aa/trpn1/trpa1a/trpa1b/tmc1/tmem132e/piezo1	10
GO:0070304	GO:0070304	positive regulation of stress-activated protein kinase signaling cascade	10/4227	25/17036	0.0681006	0.509212	0.477655	dusp22a/dusp22b/ripk1l/ripk2/ankrd6b/sh3rf1/mapk8ip3/axin1/klhdc10/map3k12	10
GO:1903510	GO:1903510	mucopolysaccharide metabolic process	10/4227	25/17036	0.0681006	0.509212	0.477655	si:dkey-26i13.5/chst12b/itih3a/itih1/chst3b/chst3a/has3/itih5/chst7/glceb	10
GO:0048588	GO:0048588	developmental cell growth	36/4227	115/17036	0.0681919	0.509212	0.477655	nanos3/ewsr1a/musk/dpysl2b/robo3/dbnla/cdkl5/pcdh17/sema6e/clns1a/sema3d/hnrnpr/ncaldb/sema4ab/pard6gb/thsd7aa/sema4e/katna1/nkx6.1/arl3l1/dbn1/tmem59l/si:ch211-129c21.1/pik3cd/nrp1a/sema5a/isl2a/sema3c/nos1/si:dkey-40c11.2/sema5bb/ntn1a/plxnb1b/col4a6/col4a5/mapk14a	36
GO:0009127	GO:0009127	purine nucleoside monophosphate biosynthetic process	29/4227	90/17036	0.0684183	0.509212	0.477655	gart/atic/pgam1b/pfklb/cox5b2/gapdh/gapdhs/eno4/gpib/pkma/gmps/prtfdc1/pfkpb/paics/ppat/pgam2/adssl/ampd2a/pfkma/eno3/pfkpa/pkmb/ak1/scn1lab/ak4/pfkmb/aprt/impdh2/pfkla	29
GO:0009168	GO:0009168	purine ribonucleoside monophosphate biosynthetic process	29/4227	90/17036	0.0684183	0.509212	0.477655	gart/atic/pgam1b/pfklb/cox5b2/gapdh/gapdhs/eno4/gpib/pkma/gmps/prtfdc1/pfkpb/paics/ppat/pgam2/adssl/ampd2a/pfkma/eno3/pfkpa/pkmb/ak1/scn1lab/ak4/pfkmb/aprt/impdh2/pfkla	29
GO:0032970	GO:0032970	regulation of actin filament-based process	53/4227	177/17036	0.0687126	0.510207	0.478589	tmod1/si:ch211-176g13.8/dbnla/ect2/rac3b/baiap2l1a/mlst8/cdc42ep1a/rhoq/cdc42ep4b/fmn2b/zgc:158689/tmod4/spire1b/ptk2ba/si:ch211-175f11.5/evla/smyd2a/sptb/vaspb/spire1a/rbm24a/myoc/rhov/arpc5b/abracl/si:dkey-6b12.5/dbn1/limk1b/pfn2/zgc:114123/ek1/twf1a/cdc42ep1b/arhgap17b/rac3a/zgc:86896/baiap2a/kank2/baiap2l1b/waslb/add2/kank1b/rhogc/cdc42ep2/si:dkey-40c11.2/kank1a/gsnb/ccdc88aa/zgc:101810/fhod1…	53
GO:0048667	GO:0048667	cell morphogenesis involved in neuron differentiation	113/4227	402/17036	0.06943	0.513397	0.481581	en1b/crmp1/unc5c/apc/musk/dpysl2b/robo3/dbnla/cdkl5/pcdh17/rac1a/foxj1b/unk/emx2/zfyve26/fmr1/rest/exosc3/ncam1b/alcamb/pitpnaa/sema6e/gdf6a/dpysl5a/hdc/nptnb/clns1a/pak1/sema3d/vaspb/rbm7/hnrnpr/ncaldb/top2b/sema4ab/pard6gb/tmem106bb/thsd7aa/si:ch211-241e1.3/ephb3a/usp33/ssbp3a/ptprfb/col15a1b/ptch2/tnr/map1sb/sema4e/cnr1/katna1/fzd3a/notch1a/unc5da/nkx6.1/rb1/ncam1a/nrxn2a/arl3l1/dbn1/dpysl3/tm…	113
GO:0016054	GO:0016054	organic acid catabolic process	42/4227	137/17036	0.0702999	0.513397	0.481581	slc27a4/acads/zgc:92040/oat/tysnd1/acoxl/qdpra/si:dkey-40g16.6/aldh5a1/sdsl/hmgcl/tdh2/hadhab/aldh6a1/got2a/acadl/acadm/echdc2/si:ch73-21k16.1/hadhaa/abhd2b/si:ch211-256m1.8/gcat/eci1/shmt1/phyh/prodhb/nos1/dao.2/nos2a/gldc/acox1/shmt2/fah/got2b/enosf1/acox3/acaa2/cpt2/gls2a/amt/ido1	42
GO:0046395	GO:0046395	carboxylic acid catabolic process	42/4227	137/17036	0.0702999	0.513397	0.481581	slc27a4/acads/zgc:92040/oat/tysnd1/acoxl/qdpra/si:dkey-40g16.6/aldh5a1/sdsl/hmgcl/tdh2/hadhab/aldh6a1/got2a/acadl/acadm/echdc2/si:ch73-21k16.1/hadhaa/abhd2b/si:ch211-256m1.8/gcat/eci1/shmt1/phyh/prodhb/nos1/dao.2/nos2a/gldc/acox1/shmt2/fah/got2b/enosf1/acox3/acaa2/cpt2/gls2a/amt/ido1	42
GO:0007219	GO:0007219	Notch signaling pathway	37/4227	119/17036	0.0711941	0.513397	0.481581	tet2/arl6/maml3/neurl1aa/jag1a/dla/zgc:114200/nle1/epas1a/llgl2/dld/snx5/jag1b/dlc/psenen/id2a/hey1/thsd7aa/angptl1a/chac1/cad/notch1a/pofut1/zgc:66440/si:ch73-78o10.1/rras/llgl1/dab2/notch1b/her7/mettl3/tspan5a/si:ch73-281k2.5/notch2/angptl2b/epb41l5/neurod1	37
GO:0009147	GO:0009147	pyrimidine nucleoside triphosphate metabolic process	9/4227	22/17036	0.0714527	0.513397	0.481581	nme2a/nme5/cmpk2/uck2b/cad/uck1/uckl1b/uck2a/nme8	9
GO:0014037	GO:0014037	Schwann cell differentiation	9/4227	22/17036	0.0714527	0.513397	0.481581	dock1/bace1/ndrg1b/ndrg1a/chd7/adgrg6/sox10/nsfa/gle1	9
GO:0021879	GO:0021879	forebrain neuron differentiation	9/4227	22/17036	0.0714527	0.513397	0.481581	lef1/lhx6/auts2a/prox1a/lhx8a/otpa/fzd8a/axin1/nr4a2b	9
GO:0048886	GO:0048886	neuromast hair cell differentiation	9/4227	22/17036	0.0714527	0.513397	0.481581	mcoln1a/dcdc2b/prox1a/slc44a4/insm1a/mgat5/mcoln1b/tmem132e/neurod1	9
GO:0031110	GO:0031110	regulation of microtubule polymerization or depolymerization	13/4227	35/17036	0.0715996	0.513397	0.481581	apc/ska2/eml2/stmn1b/mapre3a/stmn1a/map1sb/stmn4/camsap2a/terf1/cyp11a1/mapre3b/map1aa	13
GO:0050803	GO:0050803	regulation of synapse structure or activity	13/4227	35/17036	0.0715996	0.513397	0.481581	dbnla/neurod2/fmr1/si:ch211-276c2.2/dnm3a/dbn1/slc17a7b/slc17a6a/caprin2/dnm1a/si:dkey-40c11.2/dnm1b/ache	13
GO:0045088	GO:0045088	regulation of innate immune response	18/4227	52/17036	0.0731112	0.513397	0.481581	hmgb1a/tlr8b/sarm1/hmgb1b/gpatch3/tlr5b/tlr5a/hmgb3b/pias4a/cd40/cav1/socs1a/irak3/b2m/mettl3/hmgb3a/lgr4/ddx58	18
GO:0008544	GO:0008544	epidermis development	28/4227	87/17036	0.0733389	0.513397	0.481581	mcoln1a/col17a1a/foxj1b/llgl2/emx2/pax2a/dcdc2b/jag1b/kdf1a/prox1a/myo7aa/slc44a4/spint1b/insm1a/nrg2a/mgat5/pth1a/mcoln1b/znf750/crb3a/anxa1a/tmem132e/anxa1b/evpla/atp1b1a/fgf3/abca12/neurod1	28
GO:0032886	GO:0032886	regulation of microtubule-based process	28/4227	87/17036	0.0733389	0.513397	0.481581	bora/apc/map6a/ska2/cep131/eml2/stmn1b/mapre3a/cfap20/stmn1a/atat1/map1sb/drc1/stmn4/hnrnpub/rassf1/camsap2a/terf1/phldb2b/ek1/cyp11a1/foxj1a/mapre3b/mdm1/ccdc65/rassf7b/map1aa/zgc:162200	28
GO:0003002	GO:0003002	regionalization	113/4227	403/17036	0.0735189	0.513397	0.481581	arl13b/lef1/pkd2/apc/tdgf1/smad2/ift46/robo3/smad9/sbno1/hoxc6b/snai1a/ppp4cb/foxh1/zbtb4/bambia/ddit4/dld/pax2a/rtf1/jag1b/nin/fmr1/pitx2/pcdh10b/pdlim7/rest/dlc/bmper/gdf6a/sybu/rspo3/gdf3/kcnh1a/ctsba/dnaaf4/pak1/bcl2l10/foxa3/eomesa/cfap20/snx10a/hoxa4a/hoxa3a/hey1/cap1/rbm24a/ctnnb2/wls/chd7/buc/rnf152/en2b/ptch2/lrrc6/hes6/ankrd6b/max/sox11b/notch1a/pou5f3/chrdl2/alg13/kcnh1b/wwtr1/wnt10b/w…	113
GO:0051093	GO:0051093	negative regulation of developmental process	59/4227	200/17036	0.0738077	0.513397	0.481581	apc/musk/jupa/id1/srgap2/ptenb/thbs2b/llgl2/loxl3b/ism1/thbs2a/npas4l/loxl3a/smyd5/tnmd/rest/sirt2/sema6e/rspo3/ptena/id2a/sema3d/rgma/sema4ab/irf4a/ptch2/sema4e/klf2b/arhgap18/enpp1/thbs1b/id2b/tnfrsf21/notch1a/serpinf1/si:ch211-129c21.1/hoxc9a/sema5a/skilb/sox10/axin1/lpar2a/axin2/sema3c/anxa1a/anxa1b/her7/sema5bb/ntn1a/si:cabz01029535.1/her8a/spi1b/skor1a/rbpms2b/bmp15/fgf17/dlx1a/gpr161/thbs1a	59
GO:0071695	GO:0071695	anatomical structure maturation	20/4227	59/17036	0.074345	0.513397	0.481581	maea/rest/adnp2a/paqr7b/gdf6a/ctbp2a/snap25b/adnp2b/chd7/gsdf/rb1/e2f1/ndrg4/nsfa/pde3a/ccnb1/mettl3/epoa/bmp15/sin3b	20
GO:0006541	GO:0006541	glutamine metabolic process	8/4227	19/17036	0.0744529	0.513397	0.481581	gmps/asns/glula/cad/glulc/gls2b/gls2a/cps1	8
GO:0009084	GO:0009084	glutamine family amino acid biosynthetic process	8/4227	19/17036	0.0744529	0.513397	0.481581	pycr1b/aldh18a1/noxred1/glula/pycr3/glulc/gls2a/cps1	8
GO:0060897	GO:0060897	neural plate regionalization	8/4227	19/17036	0.0744529	0.513397	0.481581	tdgf1/smad2/sbno1/rspo3/foxa3/fzd8a/axin1/smarca1	8
GO:0035023	GO:0035023	regulation of Rho protein signal transduction	41/4227	134/17036	0.0749341	0.513397	0.481581	farp1/mcf2la/rasgrf2a/cdc42se2/ect2/mcf2l2/plekhg5a/lpar4/plekhg2/tnfaip1/gpr4/gpr55a/ngef/tiam1b/arhgef2/triob/plekhg7/vav3b/akap12b/f2rl1.2/f2rl1.1/zgc:171965/bcr/arhgef3/plekhg5b/si:dkey-65j6.2/cavin4b/obscnb/kank2/fgd4b/rasgrf2b/si:ch73-15b2.5/zgc:172079/plekhg4/arhgef40/obscna/eps8l3b/rhoab/arhgef7a/gpr18/p2ry8	41
GO:0007409	GO:0007409	axonogenesis	105/4227	373/17036	0.0751101	0.513397	0.481581	en1b/crmp1/unc5c/apc/musk/dpysl2b/robo3/dbnla/cdkl5/pcdh17/rac1a/zfyve26/rest/exosc3/ncam1b/alcamb/pitpnaa/sema6e/gdf6a/dpysl5a/hdc/nptnb/clns1a/pak1/sema3d/vaspb/rbm7/hnrnpr/ncaldb/top2b/sema4ab/pard6gb/thsd7aa/si:ch211-241e1.3/ephb3a/usp33/ssbp3a/ptprfb/col15a1b/ptch2/tnr/map1sb/sema4e/cnr1/katna1/fzd3a/notch1a/unc5da/nkx6.1/rb1/ncam1a/nrxn2a/arl3l1/dbn1/dpysl3/tmem59l/si:ch211-129c21.1/slit1b/…	105
GO:0002287	GO:0002287	alpha-beta T cell activation involved in immune response	5/4227	10/17036	0.0758927	0.513397	0.481581	loxl3b/loxl3a/eomesa/anxa1a/anxa1b	5
GO:0002292	GO:0002292	T cell differentiation involved in immune response	5/4227	10/17036	0.0758927	0.513397	0.481581	loxl3b/loxl3a/eomesa/anxa1a/anxa1b	5
GO:0002293	GO:0002293	alpha-beta T cell differentiation involved in immune response	5/4227	10/17036	0.0758927	0.513397	0.481581	loxl3b/loxl3a/eomesa/anxa1a/anxa1b	5
GO:0007035	GO:0007035	vacuolar acidification	5/4227	10/17036	0.0758927	0.513397	0.481581	tcirg1a/tcirg1b/si:ch73-173p19.2/atp6v0a1a/rogdi	5
GO:0016926	GO:0016926	protein desumoylation	5/4227	10/17036	0.0758927	0.513397	0.481581	senp7b/senp5/senp2/senp3b/si:dkey-100n23.3	5
GO:0032479	GO:0032479	regulation of type I interferon production	5/4227	10/17036	0.0758927	0.513397	0.481581	hmgb1a/zbtb16b/hmgb1b/gpatch3/pias4a	5
GO:0032606	GO:0032606	type I interferon production	5/4227	10/17036	0.0758927	0.513397	0.481581	hmgb1a/zbtb16b/hmgb1b/gpatch3/pias4a	5
GO:0034427	GO:0034427	nuclear-transcribed mRNA catabolic process, exonucleolytic, 3'-5'	5/4227	10/17036	0.0758927	0.513397	0.481581	exosc9/exosc3/exosc7/exosc4/exosc2	5
GO:0043516	GO:0043516	regulation of DNA damage response, signal transduction by p53 class mediator	5/4227	10/17036	0.0758927	0.513397	0.481581	spred2a/prpf19/smyd2a/spred3/scrt2	5
GO:0051764	GO:0051764	actin crosslink formation	5/4227	10/17036	0.0758927	0.513397	0.481581	baiap2l1a/zgc:158689/dpysl3/baiap2a/baiap2l1b	5
GO:0061383	GO:0061383	trabecula morphogenesis	5/4227	10/17036	0.0758927	0.513397	0.481581	ids/adgrg6/nrg2a/wwtr1/kdm6ba	5
GO:0061384	GO:0061384	heart trabecula morphogenesis	5/4227	10/17036	0.0758927	0.513397	0.481581	ids/adgrg6/nrg2a/wwtr1/kdm6ba	5
GO:0070142	GO:0070142	synaptic vesicle budding	5/4227	10/17036	0.0758927	0.513397	0.481581	picalma/picalmb/dnm3a/dnm1a/dnm1b	5
GO:0090503	GO:0090503	RNA phosphodiester bond hydrolysis, exonucleolytic	5/4227	10/17036	0.0758927	0.513397	0.481581	exosc9/exosc3/exosc7/exosc10/exosc2	5
GO:0001764	GO:0001764	neuron migration	15/4227	42/17036	0.075974	0.513397	0.481581	srgap2/rest/pomgnt2/mdga2a/nhsl1a/reln/dab1b/ctnnd2b/sh3rf1/nsmfa/nkx6.1/prickle1b/gata3/vangl2/cdh1	15
GO:0043648	GO:0043648	dicarboxylic acid metabolic process	15/4227	42/17036	0.075974	0.513397	0.481581	mdh1b/mdh2/zgc:92040/oat/mdh1ab/mthfd1b/zgc:153031/got2a/mthfd1l/shmt1/shmt2/got2b/mrps36/gls2a/got1l1	15
GO:1904018	GO:1904018	positive regulation of vasculature development	15/4227	42/17036	0.075974	0.513397	0.481581	syk/jcada/utp15/elmo1/kdr/stab1/birc5b/hoxc9a/itgb1a/nrp1a/vegfab/tek/anxa1a/anxa1b/ptger3	15
GO:0043534	GO:0043534	blood vessel endothelial cell migration	12/4227	32/17036	0.0764522	0.513397	0.481581	syk/plekhg5a/sema3d/thsd7aa/ccbe1/itga5/plekhg5b/nrp1a/cald1b/anxa1a/anxa1b/efnb2a	12
GO:1902105	GO:1902105	regulation of leukocyte differentiation	12/4227	32/17036	0.0764522	0.513397	0.481581	tfe3b/loxl3b/loxl3a/ndrg1b/sh3rf1/myb/spi1a/gata3/anxa1a/anxa1b/mettl3/spi1b	12
GO:0002027	GO:0002027	regulation of heart rate	7/4227	16/17036	0.0767349	0.513397	0.481581	scn3b/scn1ba/trpm7/hcn4/scn1bb/hcn4l/mybpc3	7
GO:0006614	GO:0006614	SRP-dependent cotranslational protein targeting to membrane	7/4227	16/17036	0.0767349	0.513397	0.481581	sec61b/srp14/tram2/efhc1/tram1/sec61a1/sec61a1l	7
GO:0006884	GO:0006884	cell volume homeostasis	7/4227	16/17036	0.0767349	0.513397	0.481581	clns1a/slc12a1/slc12a7a/slc12a10.2/slc12a10.3/piezo1/slc12a8	7
GO:0018200	GO:0018200	peptidyl-glutamic acid modification	7/4227	16/17036	0.0767349	0.513397	0.481581	cfap20/zgc:92789/tpgs2/agbl2/flr/ttll1/ttll3	7
GO:0021999	GO:0021999	neural plate anterior/posterior regionalization	7/4227	16/17036	0.0767349	0.513397	0.481581	tdgf1/smad2/sbno1/rspo3/foxa3/axin1/smarca1	7
GO:0035196	GO:0035196	production of miRNAs involved in gene silencing by miRNA	7/4227	16/17036	0.0767349	0.513397	0.481581	mrpl44/lin28a/ago2/spout1/dgcr8/tarbp2/mettl3	7
GO:0061041	GO:0061041	regulation of wound healing	7/4227	16/17036	0.0767349	0.513397	0.481581	pros1/becn1/plg/lgals2a/anxa1a/anxa1b/serping1	7
GO:0070588	GO:0070588	calcium ion transmembrane transport	39/4227	127/17036	0.0770399	0.514355	0.482479	slc24a2/fam155a/si:dkey-28b4.8/pkd2/trpc4a/ryr1a/rem1/letm1/stim1a/trpc2a/atp2c1/si:ch211-260p9.3/itpr2/bcl2l10/trpc6b/trpn1/cacng7a/atp2a2b/trpc2b/trpc5b/cacna1sa/trpc1/atp2b1b/cacnb1/atp2a1/cacna1aa/cacna1ha/cacng1b/cacng4b/cax1/cacna1c/cacna1ba/trpm5/tpcn2/atp2a2a/itpr3/cacna1sb/bcl2l16/cacnb4a	39
GO:0019367	GO:0019367	fatty acid elongation, saturated fatty acid	6/4227	13/17036	0.0776387	0.515106	0.483184	elovl6l/elovl1a/elovl4b/elovl7a/elovl8b/elovl7b	6
GO:0030330	GO:0030330	DNA damage response, signal transduction by p53 class mediator	6/4227	13/17036	0.0776387	0.515106	0.483184	spred2a/prpf19/smyd2a/spred3/e2f7/scrt2	6
GO:0110020	GO:0110020	regulation of actomyosin structure organization	6/4227	13/17036	0.0776387	0.515106	0.483184	ect2/smyd2a/rbm24a/myoc/limk1b/fhod1	6
GO:0015931	GO:0015931	nucleobase-containing compound transport	27/4227	84/17036	0.078647	0.520709	0.488439	pcid2/si:ch211-160d14.6/ltv1/ddx19/slc29a3/slc35a4/thoc3/si:dkeyp-97b10.3/nmd3/eny2/igf2bp3/thoc1/ndc1/slc35a1/sdad1/slbp2/ncbp2/rrs1/thoc5/snupn/slc35b1/igf2bp1/slc29a4/gle1/slc35a3a/nup35/upf3a	27
GO:0016571	GO:0016571	histone methylation	19/4227	56/17036	0.0799254	0.528072	0.495347	eed/prmt9/setmar/fbl/ehmt2/setdb1a/jarid2b/wdr5/prdm5/dnmt3bb.2/prdm14/prmt6/carm1/dnmt1/ehmt1a/phf19/suv39h1b/setd1bb/prmt2	19
GO:0002683	GO:0002683	negative regulation of immune system process	21/4227	63/17036	0.0803999	0.529008	0.496224	loxl3b/loxl3a/smyd5/sarm1/gpatch3/irf4a/tnfrsf21/pias4a/hhla2b.2/hhla2b.1/socs1a/lpar2a/irak3/b2m/anxa1a/anxa1b/mettl3/lgr4/spi1b/serping1/zgc:153759	21
GO:0030838	GO:0030838	positive regulation of actin filament polymerization	21/4227	63/17036	0.0803999	0.529008	0.496224	rac3b/baiap2l1a/cdc42ep1a/cdc42ep4b/fmn2b/zgc:158689/spire1b/evla/vaspb/spire1a/arpc5b/zgc:114123/cdc42ep1b/rac3a/zgc:86896/baiap2a/baiap2l1b/waslb/cdc42ep2/gsnb/zgc:101810	21
GO:0031098	GO:0031098	stress-activated protein kinase signaling cascade	30/4227	95/17036	0.0814227	0.533407	0.500351	slkb/si:dkey-81j8.6/mapk14b/map4k3a/map3k4/nek12/pak1/mapk8ip2/dusp22a/dusp22b/ripk1l/ripk2/tnika/map2k2b/ankrd6b/sh3rf1/map3k7/pak6b/mapk10/csrp1a/magi3a/tnikb/mapk8ip1a/mapk8ip3/axin1/klhdc10/taok3a/stk24b/mapk14a/map3k12	30
GO:0035567	GO:0035567	non-canonical Wnt signaling pathway	14/4227	39/17036	0.0815433	0.533407	0.500351	dvl1b/rspo3/fzd3a/dub/prdm5/fzd8a/szl/znrf3/rgs3a/fzd7b/vangl2/fzd5/frzb/fzd4	14
GO:0018198	GO:0018198	peptidyl-cysteine modification	11/4227	29/17036	0.0815721	0.533407	0.500351	zgc:77880/golga7ba/golga7/zdhhc4/zdhhc24/hmbsb/gapdh/zdhhc7/zdhhc18b/zdhhc23b/zdhhc20b	11
GO:0010639	GO:0010639	negative regulation of organelle organization	38/4227	124/17036	0.0821897	0.536343	0.503104	tmod1/apc/fbxo5/aurkb/eml2/hormad1/tmod4/wnt4b/fbxo43/si:ch211-175f11.5/sptb/mcl1a/jarid2b/hnrnpub/camsap2a/terf1/prmt6/twf1a/si:dkey-108k21.10/si:dkey-108k21.21/zgc:153405/si:ch211-113a14.24/kank2/mdm1/add2/histh1l/kank1b/kank1a/gsnb/h1m/si:dkey-23a13.9/si:dkey-23a13.17/si:ch73-368j24.11/si:ch73-368j24.12/si:ch1073-153i20.4/zgc:110425/zgc:163061/kank3	38
GO:0048514	GO:0048514	blood vessel morphogenesis	108/4227	386/17036	0.0823774	0.536466	0.50322	rasa3/dla/lpar2b/syk/fbxw11b/plekhg5a/ptenb/jcada/thbs2b/pald1a/meis1b/gng2/snx5/ism1/thbs2a/npas4l/fbxw11a/lpar4/tnmd/sirt2/fkrp/dlc/si:ch211-167j9.5/bmper/enpp2/ptk2ab/gdf6a/rspo3/fli1b/ptk2ba/ptena/wdr43/prkd1/utp15/pik3c2a/foxf1/ets1/elmo1/thsd7aa/tinagl1/kdm4ab/pld1a/scg2b/lama4/arhgap18/angptl1a/kdr/map3k7/thbs1b/sox11b/tnfrsf21/adgrg6/nus1/hlx1/notch1a/ccbe1/serpinf1/fbn2b/ell/wwtr1/slc2a1…	108
GO:0048706	GO:0048706	embryonic skeletal system development	57/4227	194/17036	0.0827644	0.537884	0.50455	nansa/ptpn11a/auts2a/rap1ab/ece1/chd5/ep300a/nolc1/meis1b/loxl3b/polr1c/runx3/lbh/polr1a/pitx2/macc1/itga8/gdf6a/wdr43/meis2a/pak1/sema3d/hoxa4a/hoxa3a/rit1/dlx5a/tinagl1/rbm24a/wls/chd7/pkn2/mmachc/ahsa1a/prdm5/ptpn11b/itga5/hoxc3a/hoxc4a/smarca4a/hoxb3a/hoxb4a/xylt1/fscn1a/cacna1c/gata3/tbx1/myhz2/fgf3/itpr3/tp73/hoxd3a/hoxd4a/dlx1a/zic2a/kdm6a/med14/dhrs9	57
GO:0003146	GO:0003146	heart jogging	16/4227	46/17036	0.084491	0.545757	0.511935	pkd2/apc/ptpn11a/foxh1/foxj1b/camk2g1/lrrc6/dub/adap2/ccdc103/foxj1a/dzip1/bmpr2a/ccdc40/ntn1a/dnaaf1	16
GO:0065002	GO:0065002	intracellular protein transmembrane transport	16/4227	46/17036	0.084491	0.545757	0.511935	timm10/timm50/sec61b/agk/tomm7/sec62/tram2/efhc1/timm13/tram1/chchd4b/sec61a1/sec61a1l/grpel1/dnajc15/hspd1	16
GO:0071806	GO:0071806	protein transmembrane transport	16/4227	46/17036	0.084491	0.545757	0.511935	timm10/timm50/sec61b/agk/tomm7/sec62/tram2/efhc1/timm13/tram1/chchd4b/sec61a1/sec61a1l/grpel1/dnajc15/hspd1	16
GO:0021510	GO:0021510	spinal cord development	24/4227	74/17036	0.0854923	0.551105	0.516951	dla/dld/loxl3b/loxl3a/dlc/nkx2.9/kif6/pard6gb/pogza/dab1b/insm1a/notch1a/otpa/nkx6.1/smarcd1/fzd8a/sulf1/gata3/tal2/nos1/foxn4/notch1b/lhx3/evx2	24
GO:0010631	GO:0010631	epithelial cell migration	18/4227	53/17036	0.085985	0.551802	0.517605	syk/plekhg5a/bace2/psenen/kcnj13/slc24a5/sema3d/thsd7aa/ccbe1/itga5/plekhg5b/nrp1a/cald1b/tek/pxna/anxa1a/anxa1b/efnb2a	18
GO:0006664	GO:0006664	glycolipid metabolic process	20/4227	60/17036	0.0864686	0.551802	0.517605	pigo/st3gal5/gm2a/gal3st2/pigv/aldh5a1/galcb/st3gal4/galca/st6galnac6/neu3.2/pgap2/pigs/mppe1/pign/pigm/pigw/gal3st3/gba2/piga	20
GO:0044264	GO:0044264	cellular polysaccharide metabolic process	20/4227	60/17036	0.0864686	0.551802	0.517605	ugp2a/phka2/phkg2/pygl/ext1a/khk/b3gnt2b/has3/ext1b/extl2/gyg1a/pask/ppp1r3b/pygma/phka1b/b3gnt7/gyg1b/gys2/pygmb/zgc:77112	20
GO:1901292	GO:1901292	nucleoside phosphate catabolic process	20/4227	60/17036	0.0864686	0.551802	0.517605	pgam1b/pfklb/gapdh/gapdhs/eno4/gpib/pkma/pfkpb/nt5e/enpp1/pgam2/pfkma/eno3/pfkpa/pkmb/cnp/scn1lab/pfkmb/nudt12/pfkla	20
GO:1903509	GO:1903509	liposaccharide metabolic process	20/4227	60/17036	0.0864686	0.551802	0.517605	pigo/st3gal5/gm2a/gal3st2/pigv/aldh5a1/galcb/st3gal4/galca/st6galnac6/neu3.2/pgap2/pigs/mppe1/pign/pigm/pigw/gal3st3/gba2/piga	20
GO:0006221	GO:0006221	pyrimidine nucleotide biosynthetic process	13/4227	36/17036	0.0875549	0.557614	0.523057	dctd/tamm41/nme2a/nme5/cmpk2/uck2b/cad/uck1/uckl1b/dhodh/uck2a/umps/nme8	13
GO:0003205	GO:0003205	cardiac chamber development	15/4227	43/17036	0.0909242	0.573956	0.538387	tmem87b/ids/cadm4/pak1/klf2b/meis2b/fntb/adgrg6/myh6/nrg2a/wwtr1/ltbp3/nr2f1a/tbx3a/mybpc3	15
GO:0031214	GO:0031214	biomineral tissue development	15/4227	43/17036	0.0909242	0.573956	0.538387	ptenb/fam20cb/galnt2/ptk2ba/ptena/chd7/oc90/enpp1/atraid/omd/ano6/abcc6a/mst1/lgr4/shox	15
GO:0048592	GO:0048592	eye morphogenesis	58/4227	199/17036	0.0915034	0.573956	0.538387	abcb6a/apc/tdgf1/reep6/pcdh17/kif17/pde6c/foxh1/six3b/meis1b/ninl/znf503/pax2a/pitx2/atp6v0e1/ift80/sox4b/bves/ptk2ab/phactr4b/gdf6a/marcksb/foxg1a/id2a/ehmt2/top2b/znf644a/cdh6/ift57/sox11b/insm1a/mfap2/rx1/dzank1/dnmt3bb.2/itga5/fzd8a/pax6a/smarca4a/cdipt/socs1a/nsfa/rab11fip4a/axin1/dnmt1/foxn4/rp2/vangl2/six7/vax2/fgf3/adipor1b/ubr3/efnb2a/epb41l5/zic2a/cerkl/neurod1	58
GO:0034446	GO:0034446	substrate adhesion-dependent cell spreading	9/4227	23/17036	0.0924687	0.573956	0.538387	bves/lama4/lamb2/parvb/parvg/lamb4/pxna/ntn4/parvab	9
GO:0035845	GO:0035845	photoreceptor cell outer segment organization	9/4227	23/17036	0.0924687	0.573956	0.538387	arl13b/kif17/ninl/gucy2f/ahi1/cc2d2a/ttc26/rp2/vangl2	9
GO:0045047	GO:0045047	protein targeting to ER	9/4227	23/17036	0.0924687	0.573956	0.538387	spcs3/sec61b/srp14/sec62/tram2/efhc1/tram1/sec61a1/sec61a1l	9
GO:0046330	GO:0046330	positive regulation of JNK cascade	9/4227	23/17036	0.0924687	0.573956	0.538387	dusp22a/dusp22b/ripk1l/ripk2/ankrd6b/sh3rf1/mapk8ip3/axin1/map3k12	9
GO:0050654	GO:0050654	chondroitin sulfate proteoglycan metabolic process	9/4227	23/17036	0.0924687	0.573956	0.538387	si:dkey-26i13.5/chst12b/chst3b/b3gat2/chst3a/b3gat1a/dcn/chst7/b3gat3	9
GO:0051293	GO:0051293	establishment of spindle localization	9/4227	23/17036	0.0924687	0.573956	0.538387	ndel1a/llgl2/diaph2/wtip/llgl1/ndel1b/ccdc151/vangl2/rhoab	9
GO:0051482	GO:0051482	positive regulation of cytosolic calcium ion concentration involved in phospholipase C-activating G protein-coupled signaling pathway	9/4227	23/17036	0.0924687	0.573956	0.538387	lpar4/gpr4/gpr55a/f2rl1.2/f2rl1.1/zgc:171965/zgc:172079/gpr18/p2ry8	9
GO:0051653	GO:0051653	spindle localization	9/4227	23/17036	0.0924687	0.573956	0.538387	ndel1a/llgl2/diaph2/wtip/llgl1/ndel1b/ccdc151/vangl2/rhoab	9
GO:0060219	GO:0060219	camera-type eye photoreceptor cell differentiation	9/4227	23/17036	0.0924687	0.573956	0.538387	pcdh17/gdf6a/ehmt2/znf644a/insm1a/rx1/pax6a/cdipt/six7	9
GO:0072599	GO:0072599	establishment of protein localization to endoplasmic reticulum	9/4227	23/17036	0.0924687	0.573956	0.538387	spcs3/sec61b/srp14/sec62/tram2/efhc1/tram1/sec61a1/sec61a1l	9
GO:0009166	GO:0009166	nucleotide catabolic process	19/4227	57/17036	0.0930631	0.575398	0.53974	pgam1b/pfklb/gapdh/gapdhs/eno4/gpib/pkma/pfkpb/nt5e/pgam2/pfkma/eno3/pfkpa/pkmb/cnp/scn1lab/pfkmb/nudt12/pfkla	19
GO:0090132	GO:0090132	epithelium migration	19/4227	57/17036	0.0930631	0.575398	0.53974	syk/plekhg5a/bace2/psenen/kcnj13/slc24a5/sema3d/thsd7aa/ccbe1/itga5/plekhg5b/nrp1a/cald1b/tek/pxna/anxa1a/anxa1b/cdh1/efnb2a	19
GO:0018345	GO:0018345	protein palmitoylation	12/4227	33/17036	0.0940438	0.580332	0.544368	zgc:77880/golga7ba/zdhhc8a/golga7/zdhhc4/zdhhc24/hhat/zdhhc7/zdhhc18b/zdhhc23b/zdhhc20b/zdhhc8b	12
GO:0015711	GO:0015711	organic anion transport	60/4227	207/17036	0.0952596	0.586696	0.550337	atp11a/slc27a1b/slc25a1b/slc38a9/slc27a4/stard7/slc25a1a/pitpnab/slc4a5/slc16a9b/slc16a12b/slc16a8/slc16a3/slc38a6/mfsd2aa/abca1b/atp10b/slc7a3b/stard14/slc7a11/slc13a5b/pitpnaa/zgc:91890/atp8b2/abcc5/slc52a2/si:dkeyp-120h9.1/slc6a9/slco5a1b/oc90/slc10a4/vps18/slc10a1/atp8b3/prelid1b/slc4a2b/osbpl5/atp8b4/slc7a10b/slc25a38a/slc4a1a/slc35b1/si:ch211-234h8.7/slc16a6b/zgc:92162/anxa1a/slc37a2/anxa1b…	60
GO:0006650	GO:0006650	glycerophospholipid metabolic process	46/4227	155/17036	0.0958471	0.589173	0.55266	pi4k2a/slc27a1b/pigo/tpte/zgc:77375/tamm41/si:ch73-267c23.10/pik3c2b/si:ch211-25d12.7/ptenb/pgp/mtmr7a/enpp2/pigv/ptdss1a/crls1/ptena/pik3c2a/ptdss1b/pip4k2ab/pld1a/smpd4/pgap2/mtmr1b/pigs/pip5k1ca/pik3cd/zgc:158659/impa2/mppe1/pign/pigm/cdipt/gdpd3a/socs1a/socs2/pigw/serinc5/inpp5e/inpp5jb/pi4kab/cept1a/inpp5l/piga/si:ch211-168k14.2/plcd4b	46
GO:0090596	GO:0090596	sensory organ morphogenesis	78/4227	275/17036	0.0973035	0.59137	0.554722	abcb6a/apc/tdgf1/reep6/pcdh17/kif17/sox9a/pde6c/foxh1/foxj1b/six3b/meis1b/ninl/znf503/emx2/pax2a/dcdc2b/jag1b/msx1a/sparc/pitx2/atp6v0e1/ift80/sox4b/bmper/bves/ptk2ab/phactr4b/gdf6a/marcksb/foxg1a/id2a/gas8/slc44a4/ehmt2/top2b/chd7/znf644a/cdh6/ift57/sox11b/adgrg6/insm1a/mfap2/rx1/dzank1/dnmt3bb.2/lrrc23/itga5/fzd8a/pax6a/sox10/ttc25/smarca4a/cdipt/socs1a/nsfa/rab11fip4a/axin1/dnmt1/sox9b/gata3/t…	78
GO:0001525	GO:0001525	angiogenesis	88/4227	313/17036	0.0980488	0.59137	0.554722	dla/lpar2b/syk/fbxw11b/plekhg5a/ptenb/jcada/thbs2b/pald1a/meis1b/gng2/ism1/thbs2a/fbxw11a/lpar4/tnmd/sirt2/si:ch211-167j9.5/bmper/enpp2/ptk2ab/rspo3/fli1b/ptk2ba/ptena/wdr43/prkd1/utp15/pik3c2a/foxf1/elmo1/thsd7aa/tinagl1/pld1a/scg2b/arhgap18/angptl1a/kdr/thbs1b/sox11b/tnfrsf21/adgrg6/nus1/hlx1/notch1a/ccbe1/serpinf1/slc2a1a/fmnl3/birc5b/itga5/plekhg5b/itgb1a/nrp1a/trpc1/cald1b/engl/ppp4ca/lgals2…	88
GO:0000154	GO:0000154	rRNA modification	8/4227	20/17036	0.0980655	0.59137	0.554722	nsun5/mettl16/fbl/nsun4/nhp2/dkc1/ftsj3/nop10	8
GO:0014044	GO:0014044	Schwann cell development	8/4227	20/17036	0.0980655	0.59137	0.554722	dock1/bace1/ndrg1b/ndrg1a/chd7/adgrg6/sox10/nsfa	8
GO:0042743	GO:0042743	hydrogen peroxide metabolic process	8/4227	20/17036	0.0980655	0.59137	0.554722	prdx1/prdx6/prdx5/cat/duox/hbba2/hbaa2/prdx4	8
GO:0042761	GO:0042761	very long-chain fatty acid biosynthetic process	8/4227	20/17036	0.0980655	0.59137	0.554722	tecrb/elovl6l/tecrl2b/elovl1a/elovl4b/elovl7a/elovl8b/elovl7b	8
GO:0045619	GO:0045619	regulation of lymphocyte differentiation	8/4227	20/17036	0.0980655	0.59137	0.554722	loxl3b/loxl3a/ndrg1b/sh3rf1/gata3/anxa1a/anxa1b/mettl3	8
GO:0051147	GO:0051147	regulation of muscle cell differentiation	8/4227	20/17036	0.0980655	0.59137	0.554722	mapk14b/smyd2a/rbm24a/carm1/myf6/dab2/rbpms2b/mapk14a	8
GO:0060896	GO:0060896	neural plate pattern specification	8/4227	20/17036	0.0980655	0.59137	0.554722	tdgf1/smad2/sbno1/rspo3/foxa3/fzd8a/axin1/smarca1	8
GO:1903707	GO:1903707	negative regulation of hemopoiesis	8/4227	20/17036	0.0980655	0.59137	0.554722	loxl3b/loxl3a/smyd5/irf4a/lpar2a/anxa1a/anxa1b/spi1b	8
GO:0060041	GO:0060041	retina development in camera-type eye	62/4227	215/17036	0.0989043	0.595299	0.558407	apc/tdgf1/ift46/reep6/prickle2b/pcdh17/pde6c/meis1b/snx5/hbegfa/pde6a/ccna2/atp6v0e1/ift80/bves/pomgnt2/prpf31/gnl2/gdf6a/marcksb/foxg1a/id2a/ehmt2/top2b/chd7/znf644a/cdh6/rp1l1b/paics/mcm3/cad/ift172/insm1a/rx1/clcc1/wwtr1/dnmt3bb.2/fen1/obscnb/pax6a/smarca4a/cdipt/igf2bp1/socs1a/llgl1/dnmt1/sox9b/atp6v1e1b/atp6v1f/foxn4/olfm1a/inpp5e/rp2/six7/vax2/fgf3/dlx1a/epb41l5/zic2a/ndp/cerkl/fzd4	62
GO:0031017	GO:0031017	exocrine pancreas development	16/4227	47/17036	0.0997567	0.597378	0.560357	apc/tcf7l2/jag1b/lnx2b/meis3/ptger2a/trpm7/ehmt2/ptgs2a/notch1a/dnmt3bb.2/ppdpfb/hoxc8a/isl2a/dnmt1/dhrs9	16
GO:0035272	GO:0035272	exocrine system development	16/4227	47/17036	0.0997567	0.597378	0.560357	apc/tcf7l2/jag1b/lnx2b/meis3/ptger2a/trpm7/ehmt2/ptgs2a/notch1a/dnmt3bb.2/ppdpfb/hoxc8a/isl2a/dnmt1/dhrs9	16
GO:0005976	GO:0005976	polysaccharide metabolic process	20/4227	61/17036	0.0998136	0.597378	0.560357	ugp2a/phka2/phkg2/pygl/ext1a/khk/b3gnt2b/has3/ext1b/extl2/gyg1a/pask/ppp1r3b/pygma/phka1b/b3gnt7/gyg1b/gys2/pygmb/zgc:77112	20
GO:0016331	GO:0016331	morphogenesis of embryonic epithelium	18/4227	54/17036	0.100241	0.597684	0.560644	tdgf1/dvl1b/nin/pitx2/pcdh19/sox4b/phactr4b/pard6a/vaspb/pard6gb/sox11b/shroom3/pou5f3/vangl2/vax2/mdka/cdh1/zic2a	18
GO:2001251	GO:2001251	negative regulation of chromosome organization	18/4227	54/17036	0.100241	0.597684	0.560644	aurkb/jarid2b/hnrnpub/terf1/prmt6/si:dkey-108k21.10/si:dkey-108k21.21/zgc:153405/si:ch211-113a14.24/histh1l/h1m/si:dkey-23a13.9/si:dkey-23a13.17/si:ch73-368j24.11/si:ch73-368j24.12/si:ch1073-153i20.4/zgc:110425/zgc:163061	18
GO:0030003	GO:0030003	cellular cation homeostasis	76/4227	268/17036	0.100856	0.600224	0.563027	atp1a1a.5/slc24a2/fam155a/si:dkey-28b4.8/tcirg1a/pkd2/ryr1a/slc4a5/slc8a1a/ca15b/letm1/lpar4/abcb7/tcirg1b/pde6a/anxa6/atp1b3b/gpr4/stim1a/gpr55a/atp2c1/ptger2a/trpm7/slc30a4/si:ch211-260p9.3/itpr2/herpud1/bcl2l10/trpc6b/slc9a3.1/slc39a7/atp1b3a/agtr1a/ackr4a/opn4.1/slc39a6/scara5/f2rl1.2/f2rl1.1/zgc:171965/atp2a2b/slc8a4a/trpc2b/trpc5b/cp/ccdc115/atp1b2a/trpc1/zgc:56095/slc4a2b/si:ch73-173p19.2/…	76
GO:0042692	GO:0042692	muscle cell differentiation	72/4227	253/17036	0.101557	0.601229	0.56397	mbnl2/dmd/tmod1/gne/lef1/apc/mat2aa/myo18aa/mef2ca/mapk14b/myh7ba/slc8a1a/rac1a/myof/dock1/fkrp/kirrel3l/popdc3/bves/pomgnt2/tmod4/cited4b/gdf6a/cyp26c1/smyd2a/prox1a/asb2b/gas8/tpm3/rbm24a/akap12b/myh6/pgam2/jam3b/gmppb/csrp1a/cavin4b/obscnb/ccdc78/ambra1b/sept15/lgals2a/carm1/flii/axin1/scube1/flncb/mybpc1/myf6/tbx1/myhz2/dab2/nr2f1a/smyd1a/rbfox2/tomm70a/igfn1.3/igfn1.1/vangl2/dysf/ache/sox6/m…	72
GO:0009116	GO:0009116	nucleoside metabolic process	25/4227	79/17036	0.102477	0.601229	0.56397	pnp4a/nme2a/adkb/adka/nt5c1ba/nme5/nt5c1ab/gmps/uck2b/prtfdc1/pnp5b/ppat/cad/uck1/uckl1b/uprt/prps1a/ak4/aprt/dhodh/uck2a/ahcyl1/impdh2/umps/nme8	25
GO:0006241	GO:0006241	CTP biosynthetic process	7/4227	17/17036	0.103492	0.601229	0.56397	nme2a/nme5/uck2b/uck1/uckl1b/uck2a/nme8	7
GO:0006613	GO:0006613	cotranslational protein targeting to membrane	7/4227	17/17036	0.103492	0.601229	0.56397	sec61b/srp14/tram2/efhc1/tram1/sec61a1/sec61a1l	7
GO:0007286	GO:0007286	spermatid development	7/4227	17/17036	0.103492	0.601229	0.56397	psme4a/iqcg/spaca4l/amh/abhd2b/sycp3/piwil1	7
GO:0030500	GO:0030500	regulation of bone mineralization	7/4227	17/17036	0.103492	0.601229	0.56397	galnt2/ptk2ba/enpp1/atraid/omd/ano6/abcc6a	7
GO:0032292	GO:0032292	peripheral nervous system axon ensheathment	7/4227	17/17036	0.103492	0.601229	0.56397	dock1/bace1/ndrg1b/ndrg1a/chd7/adgrg6/sox10	7
GO:0046036	GO:0046036	CTP metabolic process	7/4227	17/17036	0.103492	0.601229	0.56397	nme2a/nme5/uck2b/uck1/uckl1b/uck2a/nme8	7
GO:0046847	GO:0046847	filopodium assembly	7/4227	17/17036	0.103492	0.601229	0.56397	gpm6ab/srgap2/fmr1/dpysl3/fmnl3/nrp1a/trpc1	7
GO:0048771	GO:0048771	tissue remodeling	7/4227	17/17036	0.103492	0.601229	0.56397	pdlim7/rspo3/plg/anxa1a/anxa1b/acp5a/lgr4	7
GO:0051153	GO:0051153	regulation of striated muscle cell differentiation	7/4227	17/17036	0.103492	0.601229	0.56397	mapk14b/smyd2a/rbm24a/carm1/myf6/dab2/mapk14a	7
GO:0060996	GO:0060996	dendritic spine development	7/4227	17/17036	0.103492	0.601229	0.56397	dbnla/srgap2/fmr1/arf6a/dbn1/caprin2/si:dkey-40c11.2	7
GO:0070167	GO:0070167	regulation of biomineral tissue development	7/4227	17/17036	0.103492	0.601229	0.56397	galnt2/ptk2ba/enpp1/atraid/omd/ano6/abcc6a	7
GO:1903047	GO:1903047	mitotic cell cycle process	78/4227	276/17036	0.103673	0.601229	0.56397	fbxl18/ncapd3/map9/bora/zdhhc8a/apc/ewsr1a/pmaip1/ccna1/psme2/eme1/ndel1a/meis1b/pdcd2/zfyve26/mad2l1bp/fbxo5/si:ch1073-266p11.2/aurkb/diaph2/ccna2/usp16/trim71/dscc1/wnt4b/gnl2/ccne2/snx9a/id2a/gpr132a/wtip/kif23/cep126/mcl1a/top2b/ints3/jtb/cdca8/cdc14aa/ppp1r7/plk3/dtl/anapc4/mcm3/hnrnpub/efhc1/rtkn2b/rb1/ccnjl/siah2l/unc119b/sass6/birc5b/smc1a/snx33/rbl2/bmb/ndel1b/e2f7/ccnd2b/tmpoa/cdkn1ba/c…	78
GO:0006497	GO:0006497	protein lipidation	23/4227	72/17036	0.104523	0.603993	0.566562	zgc:77880/golga7ba/zdhhc8a/pigo/golga7/atg10/zdhhc4/zdhhc24/pigv/hhat/zdhhc7/zdhhc18b/pgap2/pigs/mppe1/zdhhc23b/pign/zdhhc20b/pigm/nmt1a/pigw/zdhhc8b/piga	23
GO:1902905	GO:1902905	positive regulation of supramolecular fiber organization	26/4227	83/17036	0.107488	0.603993	0.566562	rac3b/baiap2l1a/cdc42ep1a/cdc42ep4b/fmn2b/zgc:158689/spire1b/evla/vaspb/spire1a/rbm24a/arpc5b/limk1b/pfn2/zgc:114123/terf1/cyp11a1/cdc42ep1b/rac3a/zgc:86896/baiap2a/baiap2l1b/waslb/cdc42ep2/gsnb/zgc:101810	26
GO:0006354	GO:0006354	DNA-templated transcription, elongation	15/4227	44/17036	0.107597	0.603993	0.566562	pcid2/si:dkeyp-97b10.3/cd3eap/eny2/elp2/thoc1/ell2/ccnt2b/ell/thoc5/wdr61/brd4/znf326/pbrm1l/gtf2f2b	15
GO:0006672	GO:0006672	ceramide metabolic process	15/4227	44/17036	0.107597	0.603993	0.566562	smpd1/degs1/gm2a/aldh5a1/galcb/cers3b/cers2a/galca/st6galnac6/smpd4/neu3.2/cers1/cers5/gba2/acer2	15
GO:0006885	GO:0006885	regulation of pH	15/4227	44/17036	0.107597	0.603993	0.566562	tcirg1a/slc4a5/ca15b/tcirg1b/slc9a3.1/slc4a2b/si:ch73-173p19.2/atp6v0a1a/slc4a1a/rogdi/slc9a7/slc4a8/slc26a6l/slc26a6/slc9a2	15
GO:0002009	GO:0002009	morphogenesis of an epithelium	126/4227	460/17036	0.107625	0.603993	0.566562	rasa3/map9/lmo7b/pkd2/apc/tdgf1/ptpn11a/rap1ab/trib3/dvl1b/sox9a/foxh1/ptenb/ep300a/foxj1b/zbtb4/camk2g1/meis1b/desi2/pax2a/nin/msx1a/klhl3/sparc/pitx2/diaph2/pcdh19/pdlim7/ift80/nek8/sox4b/bmper/bves/phactr4b/gdf3/marcksb/ctsba/wtip/pak1/pard6a/bcl2l10/vaspb/eomesa/cfap20/snx10a/pard6gb/tdp2b/rbm24a/ctnnb2/chd7/prrx1a/tnika/buc/yes1/lrrc6/scn12aa/dsg2.1/meis2b/ezrb/akap12b/rhov/sox11b/shroom3/po…	126
GO:0140053	GO:0140053	mitochondrial gene expression	17/4227	51/17036	0.108068	0.603993	0.566562	trmt10c/mrps24/coa3a/mrpl43/supv3l1/ptcd3/trmt61b/qrsl1/rars2/elac2/mrps7/tufm/mrps34/mrpl12/c1qbp/mtif3/wars2	17
GO:0002286	GO:0002286	T cell activation involved in immune response	6/4227	14/17036	0.108299	0.603993	0.566562	loxl3b/cd74a/loxl3a/eomesa/anxa1a/anxa1b	6
GO:0009068	GO:0009068	aspartate family amino acid catabolic process	6/4227	14/17036	0.108299	0.603993	0.566562	sdsl/tdh2/got2a/si:ch211-256m1.8/gcat/got2b	6
GO:0019228	GO:0019228	neuronal action potential	6/4227	14/17036	0.108299	0.603993	0.566562	scn4aa/scn12aa/rnf121/scn4ab/cacna1ha/scn1lab	6
GO:0035675	GO:0035675	neuromast hair cell development	6/4227	14/17036	0.108299	0.603993	0.566562	mcoln1a/dcdc2b/slc44a4/insm1a/mcoln1b/tmem132e	6
GO:0046626	GO:0046626	regulation of insulin receptor signaling pathway	6/4227	14/17036	0.108299	0.603993	0.566562	si:ch211-25d12.7/pid1/grb10a/socs1a/baiap2l1b/socs2	6
GO:0060606	GO:0060606	tube closure	6/4227	14/17036	0.108299	0.603993	0.566562	tdgf1/dvl1b/phactr4b/vaspb/adgrg6/shroom3	6
GO:0090329	GO:0090329	regulation of DNA-dependent DNA replication	6/4227	14/17036	0.108299	0.603993	0.566562	wdr18/dbf4b/dbf4/e2f7/e2f8/cdt1	6
GO:2000765	GO:2000765	regulation of cytoplasmic translation	6/4227	14/17036	0.108299	0.603993	0.566562	dph1/lin28a/rbm24a/dph3/mettl3/cpeb1b	6
GO:0006213	GO:0006213	pyrimidine nucleoside metabolic process	10/4227	27/17036	0.108591	0.603993	0.566562	nme2a/nme5/uck2b/cad/uck1/uckl1b/dhodh/uck2a/umps/nme8	10
GO:0033559	GO:0033559	unsaturated fatty acid metabolic process	10/4227	27/17036	0.108591	0.603993	0.566562	elovl6l/scdb/elovl1a/ptgs2a/elovl4b/fads2/anxa1a/anxa1b/elovl7a/elovl7b	10
GO:0060059	GO:0060059	embryonic retina morphogenesis in camera-type eye	10/4227	27/17036	0.108591	0.603993	0.566562	reep6/pde6c/meis1b/atp6v0e1/gdf6a/foxg1a/smarca4a/fgf3/epb41l5/zic2a	10
GO:0008360	GO:0008360	regulation of cell shape	24/4227	76/17036	0.110046	0.603993	0.566562	cdc42se2/cdc42ep1a/rhoq/cdc42ep4b/bves/palmda/tnika/palm1b/rhov/si:dkey-6b12.5/fmnl3/cdc42ep1b/fmnl1a/plxnb2a/plxnc1/brwd3/anxa1a/rhogc/cdc42ep2/anxa1b/plxna1b/fmnl2b/plxnb1b/rhoab	24
GO:0002755	GO:0002755	MyD88-dependent toll-like receptor signaling pathway	5/4227	11/17036	0.111562	0.603993	0.566562	tlr8b/tlr5b/tlr5a/irak3/b2m	5
GO:0003373	GO:0003373	dynamin family protein polymerization involved in membrane fission	5/4227	11/17036	0.111562	0.603993	0.566562	mxa/mxb/mxg/mxc/mxe	5
GO:0003374	GO:0003374	dynamin family protein polymerization involved in mitochondrial fission	5/4227	11/17036	0.111562	0.603993	0.566562	mxa/mxb/mxg/mxc/mxe	5
GO:0006206	GO:0006206	pyrimidine nucleobase metabolic process	5/4227	11/17036	0.111562	0.603993	0.566562	aldh6a1/cad/dhodh/umps/cps1	5
GO:0009303	GO:0009303	rRNA transcription	5/4227	11/17036	0.111562	0.603993	0.566562	cd3eap/chd7/taf1b/ncl/nol11	5
GO:0032612	GO:0032612	interleukin-1 production	5/4227	11/17036	0.111562	0.603993	0.566562	hmgb1a/panx1a/hmgb1b/anxa1a/anxa1b	5
GO:0032652	GO:0032652	regulation of interleukin-1 production	5/4227	11/17036	0.111562	0.603993	0.566562	hmgb1a/panx1a/hmgb1b/anxa1a/anxa1b	5
GO:0034644	GO:0034644	cellular response to UV	5/4227	11/17036	0.111562	0.603993	0.566562	mapk14b/aurkb/pold3/mettl3/mapk14a	5
GO:0035336	GO:0035336	long-chain fatty-acyl-CoA metabolic process	5/4227	11/17036	0.111562	0.603993	0.566562	elovl6l/elovl1a/elovl4b/elovl7a/elovl7b	5
GO:0035337	GO:0035337	fatty-acyl-CoA metabolic process	5/4227	11/17036	0.111562	0.603993	0.566562	elovl6l/elovl1a/elovl4b/elovl7a/elovl7b	5
GO:0042551	GO:0042551	neuron maturation	5/4227	11/17036	0.111562	0.603993	0.566562	rest/ctbp2a/snap25b/ndrg4/nsfa	5
GO:0043255	GO:0043255	regulation of carbohydrate biosynthetic process	5/4227	11/17036	0.111562	0.603993	0.566562	maea/arpp19a/pask/fam3a/fam3c	5
GO:0045851	GO:0045851	pH reduction	5/4227	11/17036	0.111562	0.603993	0.566562	tcirg1a/tcirg1b/si:ch73-173p19.2/atp6v0a1a/rogdi	5
GO:0046838	GO:0046838	phosphorylated carbohydrate dephosphorylation	5/4227	11/17036	0.111562	0.603993	0.566562	ptenb/ptena/impa2/inpp5jb/inpp5l	5
GO:0046855	GO:0046855	inositol phosphate dephosphorylation	5/4227	11/17036	0.111562	0.603993	0.566562	ptenb/ptena/impa2/inpp5jb/inpp5l	5
GO:0051452	GO:0051452	intracellular pH reduction	5/4227	11/17036	0.111562	0.603993	0.566562	tcirg1a/tcirg1b/si:ch73-173p19.2/atp6v0a1a/rogdi	5
GO:0051899	GO:0051899	membrane depolarization	5/4227	11/17036	0.111562	0.603993	0.566562	scn4aa/scn12aa/scn4ab/cacna1ha/scn1lab	5
GO:0071545	GO:0071545	inositol phosphate catabolic process	5/4227	11/17036	0.111562	0.603993	0.566562	ptenb/ptena/impa2/inpp5jb/inpp5l	5
GO:0086010	GO:0086010	membrane depolarization during action potential	5/4227	11/17036	0.111562	0.603993	0.566562	scn4aa/scn12aa/scn4ab/cacna1ha/scn1lab	5
GO:2000053	GO:2000053	regulation of Wnt signaling pathway involved in dorsal/ventral axis specification	5/4227	11/17036	0.111562	0.603993	0.566562	sybu/rspo3/axin1/axin2/caprin2	5
GO:0006631	GO:0006631	fatty acid metabolic process	39/4227	131/17036	0.113005	0.609728	0.571942	hadh/tecrb/slc27a4/acads/acsf2/elovl6l/scdb/tysnd1/acoxl/aldh5a1/hadhab/acadl/acot11a/tecrl2b/elovl1a/ptgs2a/acadm/echdc2/si:ch73-21k16.1/hadhaa/elovl4b/fads2/abhd2b/hsd17b12a/eci1/phyh/pparaa/acot15/anxa1a/anxa1b/acox1/hsd17b12b/acox3/acaa2/elovl7a/elovl8b/cpt2/lipg/elovl7b	39
GO:0002218	GO:0002218	activation of innate immune response	12/4227	34/17036	0.11389	0.609728	0.571942	hmgb1a/tlr8b/sarm1/hmgb1b/gpatch3/tlr5b/tlr5a/cd40/irak3/b2m/lgr4/ddx58	12
GO:0006040	GO:0006040	amino sugar metabolic process	12/4227	34/17036	0.11389	0.609728	0.571942	gne/chst3b/chst3a/si:ch211-286b4.4/gnpnat1/chst2a/chia.4/mgat3a/cmah/pgm3/uap1l1/chst7	12
GO:0050663	GO:0050663	cytokine secretion	12/4227	34/17036	0.11389	0.609728	0.571942	hmgb1a/tlr8b/panx1a/hmgb1b/tnfrsf21/tlr5b/tlr5a/scamp5a/anxa1a/anxa1b/lgr4/zgc:153759	12
GO:0050707	GO:0050707	regulation of cytokine secretion	12/4227	34/17036	0.11389	0.609728	0.571942	hmgb1a/tlr8b/panx1a/hmgb1b/tnfrsf21/tlr5b/tlr5a/scamp5a/anxa1a/anxa1b/lgr4/zgc:153759	12
GO:0006029	GO:0006029	proteoglycan metabolic process	20/4227	62/17036	0.114392	0.609728	0.571942	si:dkey-26i13.5/chst12b/cant1b/chst3b/b3gat2/chst3a/hs3st1/ext1a/b3gat1a/ext1b/extl2/si:ch211-236h17.3/sulf1/glcea/xylt1/dcn/hs3st1l2/chst7/b3gat3/glceb	20
GO:0031123	GO:0031123	RNA 3'-end processing	20/4227	62/17036	0.114392	0.609728	0.571942	ptcd1/exosc9/ints2/supv3l1/lsm11/ints5/exosc3/fbl/exosc7/lin28a/exosc4/ints7/slbp2/dkc1/exosc10/elac2/polr3k/exosc2/cpeb1b/ints6	20
GO:0006873	GO:0006873	cellular ion homeostasis	77/4227	274/17036	0.115826	0.609728	0.571942	atp1a1a.5/slc24a2/fam155a/si:dkey-28b4.8/tcirg1a/pkd2/ryr1a/slc4a5/slc8a1a/ca15b/letm1/slc34a1a/lpar4/abcb7/tcirg1b/pde6a/anxa6/atp1b3b/gpr4/stim1a/gpr55a/atp2c1/ptger2a/trpm7/slc30a4/si:ch211-260p9.3/itpr2/herpud1/bcl2l10/trpc6b/slc9a3.1/slc39a7/atp1b3a/agtr1a/ackr4a/opn4.1/slc39a6/scara5/f2rl1.2/f2rl1.1/zgc:171965/atp2a2b/slc8a4a/trpc2b/trpc5b/cp/ccdc115/atp1b2a/trpc1/zgc:56095/slc4a2b/si:ch73-…	77
GO:0030166	GO:0030166	proteoglycan biosynthetic process	18/4227	55/17036	0.11589	0.609728	0.571942	si:dkey-26i13.5/chst12b/cant1b/chst3b/b3gat2/chst3a/hs3st1/ext1a/b3gat1a/ext1b/extl2/si:ch211-236h17.3/glcea/xylt1/hs3st1l2/chst7/b3gat3/glceb	18
GO:0009247	GO:0009247	glycolipid biosynthetic process	14/4227	41/17036	0.116177	0.609728	0.571942	pigo/st3gal5/gal3st2/pigv/st3gal4/st6galnac6/pgap2/pigs/mppe1/pign/pigm/pigw/gal3st3/piga	14
GO:0014866	GO:0014866	skeletal myofibril assembly	14/4227	41/17036	0.116177	0.609728	0.571942	myo18aa/mef2ca/bves/tmod4/tpm3/mybpc1/smyd1a/igfn1.3/igfn1.1/mybpc3/tpcn2/obsl1b/ttn.1/ttn.2	14
GO:0034754	GO:0034754	cellular hormone metabolic process	14/4227	41/17036	0.116177	0.609728	0.571942	lef1/rdh8b/apc/cyp11c1/cyp26c1/rcor1/cyp19a1a/rdh10b/cyp17a2/cyp11a2/cyp11a1/hsd17b12a/hsd17b12b/dhrs9	14
GO:0046890	GO:0046890	regulation of lipid biosynthetic process	14/4227	41/17036	0.116177	0.609728	0.571942	lef1/slc27a1b/apc/mid1ip1l/rcor1/cyp19a1a/mid1ip1b/fam3a/anxa1a/anxa1b/ddit3/cnep1r1/ctdnep1b/star	14
GO:0071229	GO:0071229	cellular response to acid chemical	14/4227	41/17036	0.116177	0.609728	0.571942	slc38a9/rargb/lamtor1/ptger2a/sesn2/rarab/shmt1/lamtor4/brinp3a.1/brinp3a.2/shmt2/ache/cpeb1b/nfe2l2a	14
GO:0042440	GO:0042440	pigment metabolic process	16/4227	48/17036	0.116621	0.609728	0.571942	gart/hmbsb/mthfd1b/trpm7/slc24a5/iba57/prtfdc1/ppat/mthfd1l/tmem14ca/hmox1a/slc25a39/shmt1/alad/aprt/cpox	16
GO:0000768	GO:0000768	syncytium formation by plasma membrane fusion	9/4227	24/17036	0.116704	0.609728	0.571942	mapk14b/rac1a/myof/dock1/kirrel3l/pgam2/jam3b/myf6/mapk14a	9
GO:0006949	GO:0006949	syncytium formation	9/4227	24/17036	0.116704	0.609728	0.571942	mapk14b/rac1a/myof/dock1/kirrel3l/pgam2/jam3b/myf6/mapk14a	9
GO:0018230	GO:0018230	peptidyl-L-cysteine S-palmitoylation	9/4227	24/17036	0.116704	0.609728	0.571942	zgc:77880/golga7ba/golga7/zdhhc4/zdhhc24/zdhhc7/zdhhc18b/zdhhc23b/zdhhc20b	9
GO:0018231	GO:0018231	peptidyl-S-diacylglycerol-L-cysteine biosynthetic process from peptidyl-cysteine	9/4227	24/17036	0.116704	0.609728	0.571942	zgc:77880/golga7ba/golga7/zdhhc4/zdhhc24/zdhhc7/zdhhc18b/zdhhc23b/zdhhc20b	9
GO:0042770	GO:0042770	signal transduction in response to DNA damage	9/4227	24/17036	0.116704	0.609728	0.571942	spred2a/prpf19/smyd2a/spred3/dtl/e2f7/chek2/stk33/scrt2	9
GO:0140253	GO:0140253	cell-cell fusion	9/4227	24/17036	0.116704	0.609728	0.571942	mapk14b/rac1a/myof/dock1/kirrel3l/pgam2/jam3b/myf6/mapk14a	9
GO:0048793	GO:0048793	pronephros development	37/4227	124/17036	0.117013	0.609728	0.571942	fat1a/pkd2/tdgf1/ift46/slc41a1/camk2g1/pax2a/osr1/dcdc2b/tmem234/nek8/kirrel3l/osr2/ptger2a/pard6gb/ptgs2a/cdh6/lrrc6/ift172/nphs2/wwtr1/sept15/irx3b/glis2b/vcana/ttc26/usp40/etv5b/ccdc40/rp2/sec61a1/vhl/p4htm/sec61a1l/epoa/dnaaf1/ift81	37
GO:1903530	GO:1903530	regulation of secretion by cell	44/4227	150/17036	0.117594	0.609728	0.571942	arfip1/rfx3/mtnr1bb/hmgb1a/tlr8b/rap1ab/tcf7l2/vip/cplx2/panx1a/hmgb1b/mtnr1ba/rims2a/ica1/trpm7/cplx3b/mctp2a/rims3/ralab/rab15/tnfrsf21/rfx6/napbb/tlr5b/tlr5a/rab27b/nkx6.1/zgc:162239/amh/hmgn3/syt12/syt9b/scamp5a/rab3db/cacna1ha/anxa1a/anxa1b/fes/mctp2b/lgr4/syt13/ano1/sept5a/zgc:153759	44
GO:0006913	GO:0006913	nucleocytoplasmic transport	31/4227	102/17036	0.11761	0.609728	0.571942	pcid2/kpnb3/ltv1/kpna7/ddx19/ipo9/lsg1/thoc3/si:dkeyp-97b10.3/kpna4/nmd3/eny2/nutf2/kpnb1/thoc1/sdad1/ncbp2/kpna1/rrs1/thoc5/snupn/tnpo2/kpna2/tnpo3/rpain/dzip1/heatr3/gle1/nup35/pttg1ipb/xpo4	31
GO:0050770	GO:0050770	regulation of axonogenesis	31/4227	102/17036	0.11761	0.609728	0.571942	musk/dpysl2b/dbnla/cdkl5/sema6e/pak1/sema3d/ncaldb/sema4ab/pard6gb/col15a1b/sema4e/nkx6.1/arl3l1/dbn1/si:ch211-129c21.1/pik3cd/nrp1a/sema5a/lrrc4bb/plxnb2a/plxnc1/sema3c/si:dkey-40c11.2/plxna1b/sema5bb/ntn1a/plxnb1b/vax2/rbpms2b/mapk14a	31
GO:0051169	GO:0051169	nuclear transport	31/4227	102/17036	0.11761	0.609728	0.571942	pcid2/kpnb3/ltv1/kpna7/ddx19/ipo9/lsg1/thoc3/si:dkeyp-97b10.3/kpna4/nmd3/eny2/nutf2/kpnb1/thoc1/sdad1/ncbp2/kpna1/rrs1/thoc5/snupn/tnpo2/kpna2/tnpo3/rpain/dzip1/heatr3/gle1/nup35/pttg1ipb/xpo4	31
GO:0007266	GO:0007266	Rho protein signal transduction	57/4227	199/17036	0.120687	0.623853	0.585192	farp1/mcf2la/rasgrf2a/cdc42se2/ect2/mcf2l2/plekhg5a/rac3b/rac1a/cdc42ep1a/rhoq/cdc42ep4b/lpar4/plekhg2/tnfaip1/gpr4/gpr55a/ngef/tiam1b/arhgef2/triob/phactr4b/plekhg7/ctnnal1/vav3b/akap12b/rhov/f2rl1.2/f2rl1.1/zgc:171965/rtkn2b/si:dkey-6b12.5/bcr/arhgef3/plekhg5b/si:dkey-65j6.2/cavin4b/obscnb/cdc42ep1b/rhot1a/arhgdig/rac3a/kank2/fgd4b/rhogc/cdc42ep2/rasgrf2b/si:ch73-15b2.5/zgc:172079/plekhg4/arhge…	57
GO:0008016	GO:0008016	regulation of heart contraction	21/4227	66/17036	0.120923	0.623853	0.585192	melk/pkd2/grk5/slc8a1a/trpm4b.1/scn3b/s100a1/scn1ba/trpm7/hcn4/scn1bb/prrx1a/scn12aa/parvb/hcn4l/kcnh6a/trpm4a/cacna1c/foxn4/mybpc3/atp2a2a	21
GO:0048884	GO:0048884	neuromast development	21/4227	66/17036	0.120923	0.623853	0.585192	mcoln1a/lef1/llgl2/dcdc2b/cd74a/rspo3/prox1a/slc44a4/insm1a/shroom3/cldnb/cd74b/mgat5/sulf1/cav1/mcoln1b/llgl1/wnk1b/tmem132e/ildr1b/neurod1	21
GO:0008361	GO:0008361	regulation of cell size	29/4227	95/17036	0.121424	0.625301	0.58655	musk/dpysl2b/dbnla/cdkl5/sema6e/clns1a/slc12a1/sema3d/ncaldb/sema4ab/pard6gb/slc12a7a/sema4e/nkx6.1/arl3l1/dbn1/si:ch211-129c21.1/pik3cd/sema5a/lamtor4/sema3c/si:dkey-40c11.2/sema5bb/ntn1a/slc12a10.2/slc12a10.3/piezo1/mapk14a/slc12a8	29
GO:0048703	GO:0048703	embryonic viscerocranium morphogenesis	32/4227	106/17036	0.121597	0.625301	0.58655	ptpn11a/auts2a/ece1/chd5/meis1b/loxl3b/polr1c/runx3/lbh/polr1a/pitx2/itga8/wdr43/meis2a/pak1/rit1/dlx5a/tinagl1/wls/pkn2/mmachc/prdm5/ptpn11b/itga5/smarca4a/fscn1a/tbx1/dlx1a/zic2a/kdm6a/med14/dhrs9	32
GO:0045785	GO:0045785	positive regulation of cell adhesion	11/4227	31/17036	0.123013	0.63054	0.591464	emilin2a/emilin1a/ecm2/si:dkey-32e6.6/hhla2b.2/hhla2b.1/gata3/anxa1a/anxa1b/emilin2b/si:dkey-6n6.1	11
GO:0006401	GO:0006401	RNA catabolic process	39/4227	132/17036	0.123453	0.63054	0.591464	pcid2/exosc9/dis3/patl1/parn/smg8/dcps/pde12/heatr1/csdc2a/supv3l1/tbp/vip/dnd1/fmr1/hnrnpa0a/exosc3/mettl16/zfp36l1a/syncripl/exosc7/ago3b/pabpc1b/lin28a/rbm24a/exosc4/zfp36l1b/hnrnpub/ncl/ncbp2/exosc10/zgc:103759/fen1/carhsp1/snd1/exosc2/cth1/mettl3/upf3a	39
GO:0098739	GO:0098739	import across plasma membrane	24/4227	77/17036	0.123828	0.63054	0.591464	atp1a1a.5/fam155a/atp1b3b/kcnj13/kcnj14/zgc:162160/slc12a1/kcnj1a.6/kcnj1a.5/kcnj1a.1/kcnj5/slc9a3.1/atp1b3a/slc12a7a/slc39a6/atp1b2a/kcnj11l/kcnj3b/atp1b1a/slc9a7/slc12a10.2/slc12a10.3/slc9a2/slc12a8	24
GO:0009142	GO:0009142	nucleoside triphosphate biosynthetic process	27/4227	88/17036	0.125286	0.63054	0.591464	pgam1b/pfklb/nme2a/cox5b2/nme5/gapdh/gapdhs/eno4/cmpk2/gpib/pkma/uck2b/pfkpb/cad/uck1/pgam2/uckl1b/pfkma/eno3/pfkpa/pkmb/ak1/scn1lab/pfkmb/uck2a/nme8/pfkla	27
GO:0006998	GO:0006998	nuclear envelope organization	8/4227	21/17036	0.125385	0.63054	0.591464	zdhhc8a/zgc:152977/ubxn2a/bmb/lemd3/tmpoa/si:dkey-92f12.2/ctdnep1b	8
GO:0009411	GO:0009411	response to UV	8/4227	21/17036	0.125385	0.63054	0.591464	mapk14b/aurkb/ercc2/ddb2/dtl/pold3/mettl3/mapk14a	8
GO:0050650	GO:0050650	chondroitin sulfate proteoglycan biosynthetic process	8/4227	21/17036	0.125385	0.63054	0.591464	si:dkey-26i13.5/chst12b/chst3b/b3gat2/chst3a/b3gat1a/chst7/b3gat3	8
GO:0072583	GO:0072583	clathrin-dependent endocytosis	8/4227	21/17036	0.125385	0.63054	0.591464	picalma/inpp5f/picalmb/unc119b/dnm1a/gak/dnm1b/dnajc6	8
GO:2000045	GO:2000045	regulation of G1/S transition of mitotic cell cycle	8/4227	21/17036	0.125385	0.63054	0.591464	psme2/plk3/rb1/rbl2/e2f7/ccnd2b/anxa1a/anxa1b	8
GO:0006220	GO:0006220	pyrimidine nucleotide metabolic process	13/4227	38/17036	0.125592	0.63054	0.591464	dctd/tamm41/nme2a/nme5/cmpk2/uck2b/cad/uck1/uckl1b/dhodh/uck2a/umps/nme8	13
GO:0032872	GO:0032872	regulation of stress-activated MAPK cascade	13/4227	38/17036	0.125592	0.63054	0.591464	mapk8ip2/dusp22a/dusp22b/ripk1l/ripk2/ankrd6b/sh3rf1/magi3a/mapk8ip1a/mapk8ip3/axin1/klhdc10/map3k12	13
GO:0070302	GO:0070302	regulation of stress-activated protein kinase signaling cascade	13/4227	38/17036	0.125592	0.63054	0.591464	mapk8ip2/dusp22a/dusp22b/ripk1l/ripk2/ankrd6b/sh3rf1/magi3a/mapk8ip1a/mapk8ip3/axin1/klhdc10/map3k12	13
GO:0001946	GO:0001946	lymphangiogenesis	15/4227	45/17036	0.125989	0.63054	0.591464	pkd2/syk/pkd1b/itga9/prkd1/prox1a/elmo1/cad/ccbe1/stab1/hoxc9a/e2f7/notch1b/e2f8/notch2	15
GO:0030148	GO:0030148	sphingolipid biosynthetic process	15/4227	45/17036	0.125989	0.63054	0.591464	smpd1/degs1/elovl6l/st3gal5/cers3b/cers2a/elovl1a/st6galnac6/smpd4/cers1/cers5/elovl4b/elovl7a/elovl8b/elovl7b	15
GO:0035637	GO:0035637	multicellular organismal signaling	15/4227	45/17036	0.125989	0.63054	0.591464	trpm4b.1/scn4aa/scn3b/scn1ba/scn1bb/cacng7a/prrx1a/scn12aa/rnf121/scn4ab/trpm4a/cacna1ha/cacng4b/scn1lab/ccdc141	15
GO:0036303	GO:0036303	lymph vessel morphogenesis	15/4227	45/17036	0.125989	0.63054	0.591464	pkd2/syk/pkd1b/itga9/prkd1/prox1a/elmo1/cad/ccbe1/stab1/hoxc9a/e2f7/notch1b/e2f8/notch2	15
GO:0051028	GO:0051028	mRNA transport	15/4227	45/17036	0.125989	0.63054	0.591464	pcid2/ddx19/thoc3/si:dkeyp-97b10.3/eny2/igf2bp3/thoc1/ndc1/slbp2/ncbp2/thoc5/igf2bp1/gle1/nup35/upf3a	15
GO:0006333	GO:0006333	chromatin assembly or disassembly	22/4227	70/17036	0.127122	0.635208	0.595843	si:dkey-108k21.10/si:dkey-108k21.21/si:ch73-36p18.1/zgc:153405/zgc:110216/si:ch211-113a14.18/si:ch211-113a14.24/asf1ba/smarca1/histh1l/h1m/tlk1b/si:dkey-148h10.5/pbrm1l/si:dkey-23a13.9/si:dkey-23a13.17/si:ch73-368j24.11/si:ch73-368j24.12/si:ch1073-153i20.4/zgc:110425/zgc:163061/ttn.2	22
GO:0006402	GO:0006402	mRNA catabolic process	34/4227	114/17036	0.129182	0.644488	0.604548	pcid2/exosc9/patl1/parn/smg8/dcps/pde12/csdc2a/supv3l1/tbp/vip/dnd1/fmr1/hnrnpa0a/exosc3/mettl16/zfp36l1a/syncripl/exosc7/ago3b/pabpc1b/rbm24a/exosc4/zfp36l1b/hnrnpub/ncl/ncbp2/exosc10/zgc:103759/carhsp1/exosc2/cth1/mettl3/upf3a	34
GO:0046486	GO:0046486	glycerolipid metabolic process	57/4227	200/17036	0.129438	0.644758	0.604801	pi4k2a/slc27a1b/pigo/tpte/dgat2/zgc:77375/tamm41/si:ch73-267c23.10/pik3c2b/si:ch211-25d12.7/ptenb/pgp/mtmr7a/enpp2/pigv/ptdss1a/crls1/ptena/apoba/agk/pik3c2a/ptdss1b/pip4k2ab/pld1a/si:ch73-21k16.1/smpd4/pgap2/mtmr1b/pigs/pip5k1ca/pik3cd/zgc:158659/impa2/mppe1/pign/pigm/abhd2b/cdipt/gdpd3a/socs1a/pnpla3/socs2/pigw/serinc5/inpp5e/inpp5jb/si:dkey-172j4.3/cnep1r1/ctdnep1b/pi4kab/cept1a/lipg/inpp5l/dg…	57
GO:0051046	GO:0051046	regulation of secretion	45/4227	155/17036	0.130277	0.647918	0.607765	arfip1/rfx3/mtnr1bb/hmgb1a/tlr8b/rap1ab/tcf7l2/vip/cplx2/panx1a/hmgb1b/mtnr1ba/rims2a/ica1/trpm7/cplx3b/mctp2a/rims3/ralab/rab15/tnfrsf21/rfx6/napbb/tlr5b/tlr5a/rab27b/nkx6.1/zgc:162239/amh/hmgn3/syt12/syt9b/scamp5a/rab3db/cacna1ha/anxa1a/anxa1b/ptger3/fes/mctp2b/lgr4/syt13/ano1/sept5a/zgc:153759	45
GO:0007229	GO:0007229	integrin-mediated signaling pathway	18/4227	56/17036	0.132926	0.652358	0.61193	loxl3b/adam8a/itga9/loxl3a/itga6l/itga10/itga8/phactr4b/si:ch211-188c16.1/fybb/itga5/itgb1a/itga11b/itga3a/im:7154036/itgb4/itgb5/itgbl1	18
GO:0042490	GO:0042490	mechanoreceptor differentiation	18/4227	56/17036	0.132926	0.652358	0.61193	mcoln1a/dla/foxj1b/camk2g1/emx2/pax2a/dcdc2b/jag1b/prox1a/myo7aa/slc44a4/insm1a/mgat5/mcoln1b/crb3a/tmem132e/fgf3/neurod1	18
GO:0042158	GO:0042158	lipoprotein biosynthetic process	23/4227	74/17036	0.13301	0.652358	0.61193	zgc:77880/golga7ba/zdhhc8a/pigo/golga7/atg10/zdhhc4/zdhhc24/pigv/hhat/zdhhc7/zdhhc18b/pgap2/pigs/mppe1/zdhhc23b/pign/zdhhc20b/pigm/nmt1a/pigw/zdhhc8b/piga	23
GO:0033866	GO:0033866	nucleoside bisphosphate biosynthetic process	10/4227	28/17036	0.133026	0.652358	0.61193	pank2/elovl6l/acss1/elovl1a/elovl4b/coasy/dcakd/pdha1a/elovl7a/elovl7b	10
GO:0034030	GO:0034030	ribonucleoside bisphosphate biosynthetic process	10/4227	28/17036	0.133026	0.652358	0.61193	pank2/elovl6l/acss1/elovl1a/elovl4b/coasy/dcakd/pdha1a/elovl7a/elovl7b	10
GO:0034033	GO:0034033	purine nucleoside bisphosphate biosynthetic process	10/4227	28/17036	0.133026	0.652358	0.61193	pank2/elovl6l/acss1/elovl1a/elovl4b/coasy/dcakd/pdha1a/elovl7a/elovl7b	10
GO:0048488	GO:0048488	synaptic vesicle endocytosis	10/4227	28/17036	0.133026	0.652358	0.61193	nlgn2b/picalma/nlgn3a/picalmb/amph/dnm3a/dnm1a/nlgn3b/dnm1b/nlgn2a	10
GO:0055075	GO:0055075	potassium ion homeostasis	10/4227	28/17036	0.133026	0.652358	0.61193	atp1a1a.5/atp1b3b/slc12a1/atp1b3a/slc12a7a/atp1b2a/atp1b1a/slc12a10.2/slc12a10.3/slc12a8	10
GO:0140238	GO:0140238	presynaptic endocytosis	10/4227	28/17036	0.133026	0.652358	0.61193	nlgn2b/picalma/nlgn3a/picalmb/amph/dnm3a/dnm1a/nlgn3b/dnm1b/nlgn2a	10
GO:0006760	GO:0006760	folic acid-containing compound metabolic process	7/4227	18/17036	0.13459	0.652358	0.61193	mthfd1b/zgc:153031/mthfd1l/zgc:171566/shmt1/shmt2/mthfs	7
GO:0031050	GO:0031050	dsRNA processing	7/4227	18/17036	0.13459	0.652358	0.61193	mrpl44/lin28a/ago2/spout1/dgcr8/tarbp2/mettl3	7
GO:0042744	GO:0042744	hydrogen peroxide catabolic process	7/4227	18/17036	0.13459	0.652358	0.61193	prdx1/prdx6/prdx5/cat/hbba2/hbaa2/prdx4	7
GO:0046040	GO:0046040	IMP metabolic process	7/4227	18/17036	0.13459	0.652358	0.61193	gart/atic/prtfdc1/paics/ppat/adssl/ampd2a	7
GO:0050890	GO:0050890	cognition	7/4227	18/17036	0.13459	0.652358	0.61193	vip/fmr1/nf1a/pcxa/ngfa/si:ch73-151m17.5/pappaa	7
GO:0050974	GO:0050974	detection of mechanical stimulus involved in sensory perception	7/4227	18/17036	0.13459	0.652358	0.61193	lhfpl5a/myo7aa/trpn1/trpa1a/trpa1b/tmc1/tmem132e	7
GO:0070918	GO:0070918	production of small RNA involved in gene silencing by RNA	7/4227	18/17036	0.13459	0.652358	0.61193	mrpl44/lin28a/ago2/spout1/dgcr8/tarbp2/mettl3	7
GO:0055082	GO:0055082	cellular chemical homeostasis	80/4227	288/17036	0.134745	0.652358	0.61193	atp1a1a.5/slc24a2/fam155a/si:dkey-28b4.8/tcirg1a/pkd2/ryr1a/slc4a5/slc8a1a/ca15b/letm1/slc34a1a/lpar4/abcb7/tcirg1b/pde6a/anxa6/atp1b3b/gpr4/stim1a/gpr55a/atp2c1/ptger2a/trpm7/slc30a4/si:ch211-260p9.3/itpr2/herpud1/bcl2l10/trpc6b/slc9a3.1/slc39a7/atp1b3a/agtr1a/ackr4a/opn4.1/slc39a6/scara5/rfx6/f2rl1.2/f2rl1.1/zgc:171965/atp2a2b/slc8a4a/trpc2b/trpc5b/cp/ccdc115/hmgn3/atp1b2a/trpc1/zgc:56095/slc4a…	80
GO:0035315	GO:0035315	hair cell differentiation	16/4227	49/17036	0.13507	0.652358	0.61193	mcoln1a/foxj1b/emx2/pax2a/dcdc2b/jag1b/prox1a/myo7aa/slc44a4/insm1a/mgat5/mcoln1b/crb3a/tmem132e/fgf3/neurod1	16
GO:0045787	GO:0045787	positive regulation of cell cycle	16/4227	49/17036	0.13507	0.652358	0.61193	pmaip1/dbf4b/si:ch1073-266p11.2/aurkb/dbf4/cdc14aa/ppp1r7/anapc4/hnrnpub/ccny/e2f7/ccnd2b/anxa1a/anxa1b/e2f8/cdc14b	16
GO:0030865	GO:0030865	cortical cytoskeleton organization	12/4227	35/17036	0.135954	0.654218	0.613675	ect2/llgl2/kif23/rtkn2b/si:dkey-178k16.1/fmnl3/nanog/fmnl1a/llgl1/waslb/fmnl2b/dlg1	12
GO:0046328	GO:0046328	regulation of JNK cascade	12/4227	35/17036	0.135954	0.654218	0.613675	mapk8ip2/dusp22a/dusp22b/ripk1l/ripk2/ankrd6b/sh3rf1/magi3a/mapk8ip1a/mapk8ip3/axin1/map3k12	12
GO:0043542	GO:0043542	endothelial cell migration	14/4227	42/17036	0.136278	0.654218	0.613675	syk/plekhg5a/sema3d/thsd7aa/ccbe1/itga5/plekhg5b/nrp1a/cald1b/tek/pxna/anxa1a/anxa1b/efnb2a	14
GO:0045089	GO:0045089	positive regulation of innate immune response	14/4227	42/17036	0.136278	0.654218	0.613675	hmgb1a/tlr8b/sarm1/hmgb1b/gpatch3/tlr5b/tlr5a/hmgb3b/cd40/irak3/b2m/hmgb3a/lgr4/ddx58	14
GO:0001568	GO:0001568	blood vessel development	120/4227	442/17036	0.136697	0.65524	0.614634	rasa3/dla/lpar2b/syk/fbxw11b/nr2f1b/plekhg5a/foxh1/ptenb/jcada/thbs2b/pald1a/meis1b/gng2/osr1/snx5/ism1/thbs2a/npas4l/fbxw11a/lpar4/tnmd/sirt2/fkrp/dlc/si:ch211-167j9.5/nf1a/bmper/enpp2/ptk2ab/gdf6a/rspo3/fli1b/ptk2ba/ptena/wdr43/prkd1/utp15/pik3c2a/foxf1/ets1/elmo1/si:rp71-45k5.2/zgc:113424/thsd7aa/tinagl1/kdm4ab/pld1a/scg2b/lama4/arhgap18/angptl1a/kdr/map3k7/thbs1b/sox11b/tnfrsf21/adgrg6/nus1/h…	120
GO:0048593	GO:0048593	camera-type eye morphogenesis	44/4227	152/17036	0.13808	0.660871	0.619916	abcb6a/tdgf1/reep6/pcdh17/pde6c/foxh1/six3b/meis1b/znf503/pax2a/pitx2/atp6v0e1/ift80/sox4b/bves/ptk2ab/phactr4b/gdf6a/marcksb/foxg1a/ehmt2/top2b/znf644a/cdh6/sox11b/insm1a/rx1/dnmt3bb.2/itga5/fzd8a/pax6a/smarca4a/cdipt/socs1a/dnmt1/foxn4/rp2/six7/vax2/fgf3/efnb2a/epb41l5/zic2a/cerkl	44
GO:0048675	GO:0048675	axon extension	30/4227	100/17036	0.138761	0.662138	0.621104	musk/dpysl2b/robo3/dbnla/cdkl5/pcdh17/sema6e/clns1a/sema3d/hnrnpr/ncaldb/sema4ab/thsd7aa/sema4e/katna1/nkx6.1/arl3l1/dbn1/tmem59l/si:ch211-129c21.1/nrp1a/sema5a/isl2a/sema3c/si:dkey-40c11.2/sema5bb/ntn1a/plxnb1b/col4a6/col4a5	30
GO:0048882	GO:0048882	lateral line development	30/4227	100/17036	0.138761	0.662138	0.621104	mcoln1a/lef1/lpar2b/apc/rltgr/llgl2/dcdc2b/cd74a/canx/rspo3/prox1a/slc44a4/insm1a/shroom3/cldnb/cd74b/mgat5/sulf1/cav1/mcoln1b/llgl1/cd9b/wnk1b/f11r.1/ntrk2b/tmem132e/gnb1b/fgf3/ildr1b/neurod1	30
GO:0016049	GO:0016049	cell growth	41/4227	141/17036	0.140585	0.663999	0.62285	nanos3/ewsr1a/musk/dpysl2b/robo3/dbnla/cdkl5/pcdh17/supv3l1/sema6e/clns1a/sema3d/wfdc1/hnrnpr/slc44a4/ncaldb/sema4ab/pard6gb/thsd7aa/sema4e/katna1/nkx6.1/arl3l1/dbn1/tmem59l/si:ch211-129c21.1/pik3cd/nrp1a/sema5a/isl2a/socs2/sema3c/nos1/si:dkey-40c11.2/sema5bb/ntn1a/plxnb1b/si:cabz01029535.1/col4a6/col4a5/mapk14a	41
GO:0048925	GO:0048925	lateral line system development	34/4227	115/17036	0.141476	0.663999	0.62285	mcoln1a/lef1/lpar2b/apc/rltgr/llgl2/col17a1b/dcdc2b/cd74a/canx/rspo3/prox1a/slc44a4/adgrg6/insm1a/shroom3/cldnb/cd74b/mgat5/sulf1/cav1/mcoln1b/nsfa/llgl1/cd9b/wnk1b/f11r.1/ntrk2b/tmem132e/foxd3/gnb1b/fgf3/ildr1b/neurod1	34
GO:0048762	GO:0048762	mesenchymal cell differentiation	46/4227	160/17036	0.143404	0.663999	0.62285	radil/lef1/esf1/dla/snai1a/llgl2/rtf1/lbh/polr1a/fmr1/anxa6/meis3/masp1/bmper/sema6e/phactr4b/wtip/pak1/sema3d/sema4ab/chd7/prrx1a/slc39a6/sema4e/nrg2a/si:ch211-129c21.1/nrp1a/sema5a/ek1/kctd15a/sox10/atp6v0a1a/smarca4a/fscn1a/olfm2a/cax1/sema3c/tbx1/sema5bb/foxd3/parp3/tfap2c/fgf3/zic2a/med14/dhrs9	46
GO:0008593	GO:0008593	regulation of Notch signaling pathway	17/4227	53/17036	0.143493	0.663999	0.62285	arl6/neurl1aa/jag1a/dla/llgl2/jag1b/id2a/thsd7aa/angptl1a/chac1/cad/llgl1/mettl3/tspan5a/angptl2b/epb41l5/neurod1	17
GO:0016358	GO:0016358	dendrite development	17/4227	53/17036	0.143493	0.663999	0.62285	dbnla/srgap2/cdkl5/fmr1/tmem106bb/si:ch211-241e1.3/map1sb/arf6a/dbn1/pacsin1a/ntn2/caprin2/si:dkey-40c11.2/ntn1a/rbpms2b/map1aa/zmp:0000001168	17
GO:0009063	GO:0009063	cellular amino acid catabolic process	25/4227	82/17036	0.143937	0.663999	0.62285	zgc:92040/oat/qdpra/si:dkey-40g16.6/aldh5a1/sdsl/hmgcl/tdh2/aldh6a1/got2a/si:ch211-256m1.8/gcat/shmt1/prodhb/nos1/dao.2/nos2a/gldc/shmt2/fah/got2b/enosf1/gls2a/amt/ido1	25
GO:0009201	GO:0009201	ribonucleoside triphosphate biosynthetic process	25/4227	82/17036	0.143937	0.663999	0.62285	pgam1b/pfklb/nme2a/cox5b2/nme5/gapdh/gapdhs/eno4/gpib/pkma/uck2b/pfkpb/cad/uck1/pgam2/uckl1b/pfkma/eno3/pfkpa/pkmb/scn1lab/pfkmb/uck2a/nme8/pfkla	25
GO:0006275	GO:0006275	regulation of DNA replication	9/4227	25/17036	0.144043	0.663999	0.62285	wdr18/dbf4b/dscc1/dbf4/gmnn/terf1/e2f7/e2f8/cdt1	9
GO:0009950	GO:0009950	dorsal/ventral axis specification	9/4227	25/17036	0.144043	0.663999	0.62285	sybu/rspo3/pak1/ctnnb2/glcea/axin1/axin2/caprin2/sox19b	9
GO:1901264	GO:1901264	carbohydrate derivative transport	9/4227	25/17036	0.144043	0.663999	0.62285	si:ch211-160d14.6/slc29a3/mfsd2aa/slc35a4/slc35a1/slc35b1/slc29a4/slc37a2/slc35a3a	9
GO:0006188	GO:0006188	IMP biosynthetic process	6/4227	15/17036	0.144166	0.663999	0.62285	gart/atic/prtfdc1/paics/ppat/ampd2a	6
GO:0009071	GO:0009071	serine family amino acid catabolic process	6/4227	15/17036	0.144166	0.663999	0.62285	sdsl/shmt1/dao.2/gldc/shmt2/amt	6
GO:0009749	GO:0009749	response to glucose	6/4227	15/17036	0.144166	0.663999	0.62285	khk/rfx6/hmgn3/nos2a/ache/ano1	6
GO:0030317	GO:0030317	flagellated sperm motility	6/4227	15/17036	0.144166	0.663999	0.62285	tacr3l/tacr1b/dnah1/iqcg/ccdc135/mettl3	6
GO:0030388	GO:0030388	fructose 1,6-bisphosphate metabolic process	6/4227	15/17036	0.144166	0.663999	0.62285	pfklb/pfkpb/pfkma/pfkpa/tigara/pfkmb	6
GO:0043001	GO:0043001	Golgi to plasma membrane protein transport	6/4227	15/17036	0.144166	0.663999	0.62285	blzf1/si:dkey-27b3.2/si:dkey-206p8.1/anxa13l/nsfa/sys1	6
GO:0044091	GO:0044091	membrane biogenesis	6/4227	15/17036	0.144166	0.663999	0.62285	nlgn2b/nlgn3a/cav2/cav1/nlgn3b/nlgn2a	6
GO:0046033	GO:0046033	AMP metabolic process	6/4227	15/17036	0.144166	0.663999	0.62285	nt5e/adssl/ampd2a/ak1/ak4/aprt	6
GO:0046653	GO:0046653	tetrahydrofolate metabolic process	6/4227	15/17036	0.144166	0.663999	0.62285	mthfd1b/zgc:153031/mthfd1l/shmt1/shmt2/mthfs	6
GO:0046717	GO:0046717	acid secretion	6/4227	15/17036	0.144166	0.663999	0.62285	slc6a9/oc90/zgc:92162/anxa1a/anxa1b/ptger3	6
GO:0048936	GO:0048936	peripheral nervous system neuron axonogenesis	6/4227	15/17036	0.144166	0.663999	0.62285	sema3d/ssbp3a/notch1a/dpysl3/rtn4r/notch1b	6
GO:0071709	GO:0071709	membrane assembly	6/4227	15/17036	0.144166	0.663999	0.62285	nlgn2b/nlgn3a/cav2/cav1/nlgn3b/nlgn2a	6
GO:0097722	GO:0097722	sperm motility	6/4227	15/17036	0.144166	0.663999	0.62285	tacr3l/tacr1b/dnah1/iqcg/ccdc135/mettl3	6
GO:1900076	GO:1900076	regulation of cellular response to insulin stimulus	6/4227	15/17036	0.144166	0.663999	0.62285	si:ch211-25d12.7/pid1/grb10a/socs1a/baiap2l1b/socs2	6
GO:0046578	GO:0046578	regulation of Ras protein signal transduction	47/4227	164/17036	0.145964	0.670818	0.629246	rasa3/farp1/mcf2la/rasgrf2a/cdc42se2/psd3l/ect2/mcf2l2/plekhg5a/psd2/lpar4/plekhg2/tnfaip1/gpr4/gpr55a/ngef/tiam1b/arhgef2/triob/iqsec3b/plekhg7/vav3b/akap12b/f2rl1.2/f2rl1.1/zgc:171965/bcr/arhgef3/plekhg5b/si:dkey-65j6.2/cavin4b/obscnb/kank2/fgd4b/rasa1a/rasgrf2b/rasa4/si:ch73-15b2.5/zgc:172079/plekhg4/arhgef40/obscna/eps8l3b/rhoab/arhgef7a/gpr18/p2ry8	47
GO:0030203	GO:0030203	glycosaminoglycan metabolic process	15/4227	46/17036	0.146069	0.670818	0.629246	si:dkey-26i13.5/chst12b/b3galt6/itih3a/itih1/chst3b/chst3a/ext1a/has3/ext1b/extl2/xylt1/itih5/chst7/glceb	15
GO:0034976	GO:0034976	response to endoplasmic reticulum stress	32/4227	108/17036	0.1469	0.671126	0.629535	pdia2/dnajb14/clgn/dgat2/dnajb12b/dnajb12a/erlec1/canx/syvn1/bbc3/serp1/herpud1/tmub1/uggt1/calr3b/sel1l/atf6/sdf2/rnf121/calr3a/pdia4/mbtps2/pdia3/cdipt/hsp90b1/hspa5/sdf2l1/xbp1/derl2/p4hb/os9/ddit3	32
GO:0007179	GO:0007179	transforming growth factor beta receptor signaling pathway	20/4227	64/17036	0.147229	0.671126	0.629535	smad2/smad9/bambia/ids/si:rp71-46j2.7/smad6b/dusp22a/si:dkey-222b8.1/tdp2b/dusp22b/tgfb1b/acvr1ba/tgfbr1b/skilb/mtmr4/pxna/bmpr1ba/bmpr2a/skor1a/smad3a	20
GO:0042445	GO:0042445	hormone metabolic process	20/4227	64/17036	0.147229	0.671126	0.629535	lef1/rdh8b/apc/ide/cyp11c1/cyp26c1/rcor1/cyp19a1a/slc44a4/rdh10b/cyp17a2/cyp11a2/cyp11a1/hsd17b12a/fdx1b/ache/cyp2r1/hsd17b12b/slc5a5/dhrs9	20
GO:0071559	GO:0071559	response to transforming growth factor beta	20/4227	64/17036	0.147229	0.671126	0.629535	smad2/smad9/bambia/ids/si:rp71-46j2.7/smad6b/dusp22a/si:dkey-222b8.1/tdp2b/dusp22b/tgfb1b/acvr1ba/tgfbr1b/skilb/mtmr4/pxna/bmpr1ba/bmpr2a/skor1a/smad3a	20
GO:0071560	GO:0071560	cellular response to transforming growth factor beta stimulus	20/4227	64/17036	0.147229	0.671126	0.629535	smad2/smad9/bambia/ids/si:rp71-46j2.7/smad6b/dusp22a/si:dkey-222b8.1/tdp2b/dusp22b/tgfb1b/acvr1ba/tgfbr1b/skilb/mtmr4/pxna/bmpr1ba/bmpr2a/skor1a/smad3a	20
GO:0036465	GO:0036465	synaptic vesicle recycling	11/4227	32/17036	0.147403	0.671126	0.629535	nlgn2b/picalma/nlgn3a/clrn1/picalmb/amph/dnm3a/dnm1a/nlgn3b/dnm1b/nlgn2a	11
GO:0045766	GO:0045766	positive regulation of angiogenesis	13/4227	39/17036	0.147616	0.671134	0.629542	syk/jcada/utp15/elmo1/kdr/birc5b/itgb1a/nrp1a/vegfab/tek/anxa1a/anxa1b/ptger3	13
GO:0007265	GO:0007265	Ras protein signal transduction	92/4227	336/17036	0.149934	0.680702	0.638517	rasa3/farp1/mcf2la/rasgrf2a/cdc42se2/psd3l/rab36/ksr1a/ect2/mcf2l2/rap1ab/plekhg5a/rac3b/rac1a/cdc42ep1a/rhoq/cdc42ep4b/psd2/lpar4/rab33ba/plekhg2/tnfaip1/gpr4/ksr1b/gpr55a/ngef/tiam1b/arhgef2/triob/phactr4b/rab25b/rab11al/iqsec3b/plekhg7/zgc:162879/rap2b/setdb1a/rit1/ctnnal1/vav3b/ralab/rab2a/rab6bb/rab11bb/akap12b/rhov/rab15/rab32a/rab27b/f2rl1.2/f2rl1.1/zgc:171965/rtkn2b/si:dkey-6b12.5/bcr/rab…	92
GO:0006825	GO:0006825	copper ion transport	5/4227	12/17036	0.153713	0.681645	0.639402	cp/steap2/si:dkey-16p21.8/steap3/cox17	5
GO:0007398	GO:0007398	ectoderm development	5/4227	12/17036	0.153713	0.681645	0.639402	tdgf1/klf2b/pou5f3/amer2/cdh1	5
GO:0010595	GO:0010595	positive regulation of endothelial cell migration	5/4227	12/17036	0.153713	0.681645	0.639402	syk/nrp1a/tek/anxa1a/anxa1b	5
GO:0010737	GO:0010737	protein kinase A signaling	5/4227	12/17036	0.153713	0.681645	0.639402	prkacba/akap1b/akap12a/akap12b/pja2	5
GO:0010830	GO:0010830	regulation of myotube differentiation	5/4227	12/17036	0.153713	0.681645	0.639402	mapk14b/rbm24a/carm1/myf6/mapk14a	5
GO:0018216	GO:0018216	peptidyl-arginine methylation	5/4227	12/17036	0.153713	0.681645	0.639402	prmt9/prdm14/prmt6/carm1/prmt2	5
GO:0030206	GO:0030206	chondroitin sulfate biosynthetic process	5/4227	12/17036	0.153713	0.681645	0.639402	si:dkey-26i13.5/chst12b/chst3b/chst3a/chst7	5
GO:0034969	GO:0034969	histone arginine methylation	5/4227	12/17036	0.153713	0.681645	0.639402	prmt9/prdm14/prmt6/carm1/prmt2	5
GO:0044332	GO:0044332	Wnt signaling pathway involved in dorsal/ventral axis specification	5/4227	12/17036	0.153713	0.681645	0.639402	sybu/rspo3/axin1/axin2/caprin2	5
GO:0046580	GO:0046580	negative regulation of Ras protein signal transduction	5/4227	12/17036	0.153713	0.681645	0.639402	rasa3/tnfaip1/akap12b/rasa1a/rasa4	5
GO:0051058	GO:0051058	negative regulation of small GTPase mediated signal transduction	5/4227	12/17036	0.153713	0.681645	0.639402	rasa3/tnfaip1/akap12b/rasa1a/rasa4	5
GO:0071425	GO:0071425	hematopoietic stem cell proliferation	5/4227	12/17036	0.153713	0.681645	0.639402	ism1/csf3b/tfec/mettl3/cyp2r1	5
GO:0071577	GO:0071577	zinc ion transmembrane transport	5/4227	12/17036	0.153713	0.681645	0.639402	slc30a4/slc39a7/slc39a6/slc39a13/slc39a3	5
GO:1902106	GO:1902106	negative regulation of leukocyte differentiation	5/4227	12/17036	0.153713	0.681645	0.639402	loxl3b/loxl3a/anxa1a/anxa1b/spi1b	5
GO:2000050	GO:2000050	regulation of non-canonical Wnt signaling pathway	5/4227	12/17036	0.153713	0.681645	0.639402	rspo3/prdm5/znrf3/rgs3a/vangl2	5
GO:2000514	GO:2000514	regulation of CD4-positive, alpha-beta T cell activation	5/4227	12/17036	0.153713	0.681645	0.639402	loxl3b/loxl3a/sh3rf1/anxa1a/anxa1b	5
GO:0017038	GO:0017038	protein import	27/4227	90/17036	0.153858	0.681645	0.639402	kpnb3/timm10/kpna7/ipo9/kpna4/timm50/agk/nutf2/tomm7/kpnb1/pex3/timm13/kpna1/snupn/tnpo2/kpna2/samm50l/tnpo3/rpain/dzip1/chchd4b/heatr3/grpel1/nup35/pttg1ipb/dnajc15/hspd1	27
GO:0034655	GO:0034655	nucleobase-containing compound catabolic process	60/4227	214/17036	0.154003	0.681645	0.639402	pcid2/exosc9/dis3/patl1/pgam1b/parn/smg8/dcps/pde12/pfklb/heatr1/csdc2a/supv3l1/tbp/vip/dnd1/fmr1/hnrnpa0a/exosc3/mettl16/gapdh/gapdhs/eno4/zfp36l1a/syncripl/gpib/pkma/exosc7/ago3b/pabpc1b/lin28a/rbm24a/exosc4/pfkpb/nt5e/zfp36l1b/enpp1/hnrnpub/rexo4/pgam2/ncl/ncbp2/exosc10/zgc:103759/pfkma/eno3/pfkpa/fen1/pkmb/cnp/carhsp1/snd1/exosc2/scn1lab/pfkmb/cth1/mettl3/nudt12/upf3a/pfkla	60
GO:0051051	GO:0051051	negative regulation of transport	16/4227	50/17036	0.155067	0.68377	0.641395	rap1ab/rem1/wnk2/cep131/vip/lgals3b/pid1/tnfrsf21/unc119b/amh/snx16/wnk1b/anxa1a/anxa1b/ptger3/lgr4	16
GO:0006094	GO:0006094	gluconeogenesis	8/4227	22/17036	0.156204	0.68377	0.641395	g6pc3/maea/gpib/arpp19a/pcxa/fam3a/fam3c/pcxb	8
GO:0006687	GO:0006687	glycosphingolipid metabolic process	8/4227	22/17036	0.156204	0.68377	0.641395	st3gal5/gm2a/aldh5a1/galcb/galca/st6galnac6/neu3.2/gba2	8
GO:0009065	GO:0009065	glutamine family amino acid catabolic process	8/4227	22/17036	0.156204	0.68377	0.641395	zgc:92040/oat/si:ch211-256m1.8/prodhb/nos1/dao.2/nos2a/gls2a	8
GO:0019319	GO:0019319	hexose biosynthetic process	8/4227	22/17036	0.156204	0.68377	0.641395	g6pc3/maea/gpib/arpp19a/pcxa/fam3a/fam3c/pcxb	8
GO:0044786	GO:0044786	cell cycle DNA replication	8/4227	22/17036	0.156204	0.68377	0.641395	dbf4b/dbf4/orc3/mcm3/e2f7/mcm6/e2f8/cdt1	8
GO:0051781	GO:0051781	positive regulation of cell division	8/4227	22/17036	0.156204	0.68377	0.641395	si:ch1073-266p11.2/aurkb/gdf3/cdc14aa/tgfb1b/fgf3/cdc14b/fgf17	8
GO:1902806	GO:1902806	regulation of cell cycle G1/S phase transition	8/4227	22/17036	0.156204	0.68377	0.641395	psme2/plk3/rb1/rbl2/e2f7/ccnd2b/anxa1a/anxa1b	8
GO:0060284	GO:0060284	regulation of cell development	85/4227	310/17036	0.157138	0.686912	0.644343	lef1/pnx/ewsr1a/musk/smad2/dpysl2b/dbnla/id1/srgap2/cdkl5/neurod2/fmr1/rest/sirt2/nf1a/sema6e/gnl2/ctbp2a/mdga2a/smyd2a/id2a/alk/pak1/sema3d/rgma/ncaldb/sema4ab/pard6gb/hey1/rbm24a/col15a1b/tnr/hes6/sema4e/zar1/id2b/stmn4/arf6a/notch1a/nsmfa/nkx6.1/arl3l1/dbn1/serpinf1/dpysl3/tcf3b/si:ch211-129c21.1/pacsin1a/ngfa/pik3cd/nrp1a/sema5a/neurod6a/lrrc4bb/sox10/lgals2a/carm1/elavl3/pde3a/plxnb2a/caprin…	85
GO:0034599	GO:0034599	cellular response to oxidative stress	14/4227	43/17036	0.158174	0.687654	0.645039	park7/nme5/sirt2/prdx1/prdx6/msra/diablob/prdx5/msrb2/msrb3/anxa1a/anxa1b/nfe2l2a/cerkl	14
GO:0048644	GO:0048644	muscle organ morphogenesis	14/4227	43/17036	0.158174	0.687654	0.645039	blzf1/fbxo32/klf2b/dpf3/nrg2a/wwtr1/mybpc1/igfn1.3/igfn1.1/dysf/mybpc3/obsl1b/ttn.1/ttn.2	14
GO:0048846	GO:0048846	axon extension involved in axon guidance	14/4227	43/17036	0.158174	0.687654	0.645039	sema6e/sema3d/hnrnpr/ncaldb/sema4ab/sema4e/arl3l1/si:ch211-129c21.1/sema5a/sema3c/sema5bb/ntn1a/col4a6/col4a5	14
GO:1902284	GO:1902284	neuron projection extension involved in neuron projection guidance	14/4227	43/17036	0.158174	0.687654	0.645039	sema6e/sema3d/hnrnpr/ncaldb/sema4ab/sema4e/arl3l1/si:ch211-129c21.1/sema5a/sema3c/sema5bb/ntn1a/col4a6/col4a5	14
GO:0008202	GO:0008202	steroid metabolic process	28/4227	94/17036	0.158482	0.687727	0.645107	msmo1/rdh8b/tm7sf2/nsdhl/cyp11c1/cyp26c1/npc2/cyp19a1a/cyp51/srd5a1/hsd3b2/arv1/cyp46a1.2/ch25hl2/faxdc2/cyp17a2/cyb5r2/cyp11a2/cyp11a1/hsd17b12a/zgc:101540/mvk/fdx1b/hsd17b7/cyp2r1/hsd17b12b/star/hsd3b1	28
GO:0001754	GO:0001754	eye photoreceptor cell differentiation	19/4227	61/17036	0.158623	0.687727	0.645107	apc/pcdh17/kif17/ninl/bves/gdf6a/ehmt2/znf644a/ift57/sox11b/insm1a/rx1/dzank1/dnmt3bb.2/pax6a/cdipt/six7/adipor1b/neurod1	19
GO:0051146	GO:0051146	striated muscle cell differentiation	63/4227	226/17036	0.159531	0.688727	0.646045	mbnl2/dmd/tmod1/gne/lef1/mat2aa/myo18aa/mef2ca/mapk14b/slc8a1a/rac1a/myof/dock1/fkrp/kirrel3l/popdc3/bves/pomgnt2/tmod4/gdf6a/cyp26c1/smyd2a/prox1a/asb2b/tpm3/rbm24a/myh6/pgam2/jam3b/gmppb/csrp1a/cavin4b/obscnb/ccdc78/ambra1b/sept15/lgals2a/carm1/flii/scube1/flncb/mybpc1/myf6/tbx1/myhz2/dab2/nr2f1a/smyd1a/rbfox2/tomm70a/igfn1.3/igfn1.1/vangl2/ache/mybpc3/tpcn2/nexn/mapk14a/neb/obsl1b/ttn.1/ttn.2/…	63
GO:0014902	GO:0014902	myotube differentiation	22/4227	72/17036	0.159864	0.688727	0.646045	dmd/myo18aa/mapk14b/rac1a/myof/dock1/kirrel3l/gdf6a/rbm24a/pgam2/jam3b/cavin4b/ccdc78/ambra1b/lgals2a/carm1/mybpc1/myf6/myhz2/rbfox2/mapk14a/klhl41a	22
GO:0008299	GO:0008299	isoprenoid biosynthetic process	10/4227	29/17036	0.160106	0.688727	0.646045	lef1/apc/pdss2/ggps1/fdps/rcor1/rdh10b/nus1/pdss1/mvk	10
GO:0046928	GO:0046928	regulation of neurotransmitter secretion	10/4227	29/17036	0.160106	0.688727	0.646045	rap1ab/cplx2/rims2a/trpm7/cplx3b/mctp2a/rims3/napbb/syt12/mctp2b	10
GO:0071166	GO:0071166	ribonucleoprotein complex localization	12/4227	36/17036	0.160154	0.688727	0.646045	pcid2/ltv1/ddx19/thoc3/si:dkeyp-97b10.3/nmd3/eny2/thoc1/sdad1/rrs1/thoc5/gle1	12
GO:0071426	GO:0071426	ribonucleoprotein complex export from nucleus	12/4227	36/17036	0.160154	0.688727	0.646045	pcid2/ltv1/ddx19/thoc3/si:dkeyp-97b10.3/nmd3/eny2/thoc1/sdad1/rrs1/thoc5/gle1	12
GO:0055080	GO:0055080	cation homeostasis	88/4227	322/17036	0.160853	0.690798	0.647988	atp1a1a.5/slc24a2/wfs1a/fam155a/si:dkey-28b4.8/tcirg1a/pkd2/ryr1a/slc4a5/slc8a1a/ca15b/slc9a3r1a/letm1/cnnm2a/lpar4/abcb7/tcirg1b/pde6a/anxa6/hephl1a/atp1b3b/gpr4/stim1a/gpr55a/atp2c1/ptger2a/trpm7/slc12a1/slc30a4/si:ch211-260p9.3/itpr2/herpud1/bcl2l10/trpc6b/slc9a3.1/slc39a7/atp1b3a/slc12a7a/agtr1a/ackr4a/opn4.1/slc39a6/scara5/f2rl1.2/f2rl1.1/zgc:171965/atp2a2b/slc8a4a/trpc2b/trpc5b/cp/ccdc115/a…	88
GO:0046700	GO:0046700	heterocycle catabolic process	70/4227	253/17036	0.161875	0.694249	0.651225	pcid2/exosc9/tet2/dis3/patl1/pgam1b/parn/smg8/dcps/pde12/pfklb/zgc:92040/heatr1/csdc2a/supv3l1/tbp/vip/dnd1/fmr1/hnrnpa0a/exosc3/mettl16/gapdh/gapdhs/eno4/xdh/zfp36l1a/aldh6a1/syncripl/gpib/pkma/uraha/exosc7/ago3b/pabpc1b/lin28a/rbm24a/exosc4/pfkpb/nt5e/zfp36l1b/enpp1/hnrnpub/rexo4/pgam2/ncl/ncbp2/exosc10/zgc:103759/pfkma/eno3/pfkpa/fen1/pkmb/cnp/hmox1a/carhsp1/snd1/prodhb/dao.2/exosc2/scn1lab/pf…	70
GO:0051783	GO:0051783	regulation of nuclear division	17/4227	54/17036	0.163365	0.699696	0.656335	bora/ewsr1a/pmaip1/pdcd2/mad2l1bp/fbxo5/aurkb/hormad1/wnt4b/gnl2/fbxo43/mcl1a/cdc14aa/ppp1r7/anapc4/hnrnpub/cdc14b	17
GO:0051495	GO:0051495	positive regulation of cytoskeleton organization	26/4227	87/17036	0.164659	0.703763	0.660149	rac3b/baiap2l1a/cdc42ep1a/cdc42ep4b/fmn2b/zgc:158689/spire1b/evla/vaspb/spire1a/rbm24a/arpc5b/limk1b/pfn2/zgc:114123/terf1/cyp11a1/cdc42ep1b/rac3a/zgc:86896/baiap2a/baiap2l1b/waslb/cdc42ep2/gsnb/zgc:101810	26
GO:0006260	GO:0006260	DNA replication	37/4227	128/17036	0.164782	0.703763	0.660149	lig4/ssrp1b/wdr18/top1l/dbf4b/eme1/mcmbp/gmnc/dscc1/dbf4/orc3/zgc:173742/gmnn/rrm2/pif1/dtl/mcm3/pold3/rrm1/nfia/sde2/top1/fen1/terf1/gins3/nfixb/e2f7/mcm10/helb/mcm6/e2f8/poln/orc6/cdt1/nfic/pold2/rmi1	37
GO:0007283	GO:0007283	spermatogenesis	20/4227	65/17036	0.165442	0.703763	0.660149	tsga10/psme4a/nme5/hormad1/iqcg/spaca4l/mei4/sass6/amh/si:ch211-225h24.2/abhd2b/sycp3/hsf5/mettl3/dnaaf1/lgr4/m1ap/spata6/ggt1a/piwil1	20
GO:0050657	GO:0050657	nucleic acid transport	20/4227	65/17036	0.165442	0.703763	0.660149	pcid2/ltv1/ddx19/thoc3/si:dkeyp-97b10.3/nmd3/eny2/igf2bp3/thoc1/ndc1/sdad1/slbp2/ncbp2/rrs1/thoc5/snupn/igf2bp1/gle1/nup35/upf3a	20
GO:0050658	GO:0050658	RNA transport	20/4227	65/17036	0.165442	0.703763	0.660149	pcid2/ltv1/ddx19/thoc3/si:dkeyp-97b10.3/nmd3/eny2/igf2bp3/thoc1/ndc1/sdad1/slbp2/ncbp2/rrs1/thoc5/snupn/igf2bp1/gle1/nup35/upf3a	20
GO:1903706	GO:1903706	regulation of hemopoiesis	23/4227	76/17036	0.165643	0.703763	0.660149	tfe3b/dld/fgfr3/loxl3b/fgfr2/loxl3a/smyd5/csf3r/ndrg1b/irf4a/sh3rf1/lpar3/dnmt3bb.1/myb/tph1a/spi1a/lpar2a/gata3/anxa1a/f11r.1/anxa1b/mettl3/spi1b	23
GO:1990138	GO:1990138	neuron projection extension	30/4227	102/17036	0.16713	0.709133	0.665186	musk/dpysl2b/robo3/dbnla/cdkl5/pcdh17/sema6e/clns1a/sema3d/hnrnpr/ncaldb/sema4ab/thsd7aa/sema4e/katna1/nkx6.1/arl3l1/dbn1/tmem59l/si:ch211-129c21.1/nrp1a/sema5a/isl2a/sema3c/si:dkey-40c11.2/sema5bb/ntn1a/plxnb1b/col4a6/col4a5	30
GO:0018022	GO:0018022	peptidyl-lysine methylation	15/4227	47/17036	0.167777	0.709981	0.665982	setd4/setmar/smyd2a/ehmt2/setdb1a/jarid2b/wdr5/prdm5/dnmt3bb.2/prmt6/dnmt1/ehmt1a/phf19/suv39h1b/setd1bb	15
GO:0031076	GO:0031076	embryonic camera-type eye development	15/4227	47/17036	0.167777	0.709981	0.665982	tdgf1/foxh1/six3b/znf503/pax2a/pitx2/sox4b/phactr4b/gdf6a/sox11b/fzd8a/smarca4a/six7/vax2/efnb2a	15
GO:0002011	GO:0002011	morphogenesis of an epithelial sheet	27/4227	91/17036	0.169427	0.714186	0.669927	map9/pitx2/diaph2/sox4b/bves/phactr4b/gdf3/ctsba/bcl2l10/eomesa/dsg2.1/ezrb/rhov/sox11b/pou5f3/nanog/cyp11a1/fscn1a/flot2a/fzd7b/sdc4/vax2/sox19b/cdh1/rhoab/satb2/cacnb4a	27
GO:0035384	GO:0035384	thioester biosynthetic process	7/4227	19/17036	0.16967	0.714186	0.669927	elovl6l/acss1/elovl1a/elovl4b/pdha1a/elovl7a/elovl7b	7
GO:0043173	GO:0043173	nucleotide salvage	7/4227	19/17036	0.16967	0.714186	0.669927	uck2b/prtfdc1/uck1/ampd2a/uckl1b/aprt/uck2a	7
GO:0071616	GO:0071616	acyl-CoA biosynthetic process	7/4227	19/17036	0.16967	0.714186	0.669927	elovl6l/acss1/elovl1a/elovl4b/pdha1a/elovl7a/elovl7b	7
GO:0006334	GO:0006334	nucleosome assembly	18/4227	58/17036	0.171042	0.717312	0.672859	si:dkey-108k21.10/si:dkey-108k21.21/si:ch73-36p18.1/zgc:153405/zgc:110216/si:ch211-113a14.18/si:ch211-113a14.24/histh1l/h1m/si:dkey-148h10.5/si:dkey-23a13.9/si:dkey-23a13.17/si:ch73-368j24.11/si:ch73-368j24.12/si:ch1073-153i20.4/zgc:110425/zgc:163061/ttn.2	18
GO:0070507	GO:0070507	regulation of microtubule cytoskeleton organization	24/4227	80/17036	0.171104	0.717312	0.672859	bora/apc/map6a/ska2/cep131/eml2/stmn1b/mapre3a/stmn1a/atat1/map1sb/stmn4/hnrnpub/rassf1/camsap2a/terf1/phldb2b/ek1/cyp11a1/mapre3b/mdm1/rassf7b/map1aa/zgc:162200	24
GO:0098771	GO:0098771	inorganic ion homeostasis	90/4227	331/17036	0.171432	0.717312	0.672859	atp1a1a.5/slc24a2/wfs1a/fam155a/si:dkey-28b4.8/tcirg1a/pkd2/ryr1a/slc4a5/slc8a1a/ca15b/slc9a3r1a/letm1/cnnm2a/slc34a1a/lpar4/abcb7/tcirg1b/pde6a/anxa6/hephl1a/atp1b3b/gpr4/stim1a/gpr55a/atp2c1/ptger2a/trpm7/slc12a1/slc30a4/si:ch211-260p9.3/itpr2/herpud1/bcl2l10/trpc6b/slc9a3.1/slc39a7/atp1b3a/slc12a7a/agtr1a/ackr4a/opn4.1/slc39a6/scara5/enpp1/f2rl1.2/f2rl1.1/zgc:171965/atp2a2b/slc8a4a/trpc2b/trpc…	90
GO:0034968	GO:0034968	histone lysine methylation	13/4227	40/17036	0.171541	0.717312	0.672859	setmar/ehmt2/setdb1a/jarid2b/wdr5/prdm5/dnmt3bb.2/prmt6/dnmt1/ehmt1a/phf19/suv39h1b/setd1bb	13
GO:0045132	GO:0045132	meiotic chromosome segregation	13/4227	40/17036	0.171541	0.717312	0.672859	meiob/ercc4/eme1/hormad1/msh4/top2b/hfm1/mei4/birc5b/syce2/terb2/m1ap/rmi1	13
GO:0001501	GO:0001501	skeletal system development	98/4227	362/17036	0.172127	0.718815	0.674269	nansa/apc/ptpn11a/ewsr1a/auts2a/mef2ca/rargb/rap1ab/ece1/chd5/sox9a/col1a1b/ep300a/nolc1/meis1b/loxl3b/polr1c/matn3b/jag1b/runx3/lbh/polr1a/fmr1/ids/sparc/pitx2/anxa6/fat3a/enpp2/macc1/itga8/gdf6a/marcksb/wdr43/meis2a/trpm7/pak1/sema3d/col11a2/hoxa4a/hoxa3a/rit1/dlx5a/tinagl1/rbm24a/wls/chd7/pkn2/si:ch211-106n13.3/mmachc/tshr/ahsa1a/specc1lb/hapln4/wwtr1/prdm5/ptpn11b/itga5/hoxc3a/hoxc4a/vwa1/nrp…	98
GO:0061053	GO:0061053	somite development	44/4227	155/17036	0.172651	0.72006	0.675436	fbxl18/dmd/lef1/apc/tdgf1/snu13b/foxh1/dld/loxl3b/rtf1/loxl3a/psd2/pcdh10b/naa15a/pdlim7/dlc/thbs3a/kcnh1a/bcl2l10/cfap20/cap1/rbm24a/chd7/hes6/notch1a/smarcd1/kcnh1b/lamb2/itga5/sulf1/cav1/axin1/ripply2/pxna/nono/myhz1.1/her7/rgs3a/tbx19/vangl2/slc7a6os/tpcn2/mapk14a/efnb2a	44
GO:0030866	GO:0030866	cortical actin cytoskeleton organization	11/4227	33/17036	0.174082	0.721171	0.676478	ect2/llgl2/kif23/rtkn2b/si:dkey-178k16.1/fmnl3/fmnl1a/llgl1/waslb/fmnl2b/dlg1	11
GO:0001895	GO:0001895	retina homeostasis	9/4227	26/17036	0.174279	0.721171	0.676478	mcoln1a/nxnl2/pde6c/gdf6a/ift57/ift172/napbb/mcoln1b/rp2	9
GO:0003170	GO:0003170	heart valve development	9/4227	26/17036	0.174279	0.721171	0.676478	pkd2/apc/jupa/pdlim7/fbn2b/adap2/sox9b/foxn4/trpv4	9
GO:0035025	GO:0035025	positive regulation of Rho protein signal transduction	9/4227	26/17036	0.174279	0.721171	0.676478	lpar4/gpr4/gpr55a/f2rl1.2/f2rl1.1/zgc:171965/zgc:172079/gpr18/p2ry8	9
GO:0048739	GO:0048739	cardiac muscle fiber development	9/4227	26/17036	0.174279	0.721171	0.676478	mybpc1/rbfox2/igfn1.3/igfn1.1/mybpc3/nexn/obsl1b/ttn.1/ttn.2	9
GO:0051289	GO:0051289	protein homotetramerization	9/4227	26/17036	0.174279	0.721171	0.676478	pfklb/usp16/evla/pfkpb/pfkma/pfkpa/shmt1/pfkmb/shmt2	9
GO:0050801	GO:0050801	ion homeostasis	93/4227	343/17036	0.174841	0.722554	0.677775	atp1a1a.5/slc24a2/wfs1a/fam155a/si:dkey-28b4.8/tcirg1a/pkd2/ryr1a/slc4a5/slc8a1a/wnk2/ca15b/slc9a3r1a/letm1/cnnm2a/slc34a1a/lpar4/abcb7/tcirg1b/klhl3/pde6a/anxa6/hephl1a/atp1b3b/gpr4/stim1a/gpr55a/atp2c1/ptger2a/trpm7/slc12a1/slc30a4/si:ch211-260p9.3/itpr2/herpud1/bcl2l10/trpc6b/slc9a3.1/slc39a7/atp1b3a/slc12a7a/agtr1a/ackr4a/opn4.1/slc39a6/scara5/enpp1/f2rl1.2/f2rl1.1/zgc:171965/atp2a2b/slc8a4a/…	93
GO:0006606	GO:0006606	protein import into nucleus	16/4227	51/17036	0.176552	0.72868	0.683522	kpnb3/kpna7/ipo9/kpna4/nutf2/kpnb1/kpna1/snupn/tnpo2/kpna2/tnpo3/rpain/dzip1/heatr3/nup35/pttg1ipb	16
GO:0051056	GO:0051056	regulation of small GTPase mediated signal transduction	51/4227	182/17036	0.177747	0.729038	0.683858	rasa3/farp1/mcf2la/rasgrf2a/cdc42se2/psd3l/ect2/mcf2l2/plekhg5a/sipa1l2/psd2/lpar4/diaph2/plekhg2/tnfaip1/gpr4/gpr55a/ngef/tiam1b/arhgef2/triob/iqsec3b/plekhg7/vav3b/akap12b/f2rl1.2/f2rl1.1/zgc:171965/bcr/arhgef3/plekhg5b/si:dkey-65j6.2/cavin4b/obscnb/kank2/fgd4b/rasa1a/rasgrf2b/rasa4/si:ch73-15b2.5/zgc:172079/plekhg4/zmp:0000001168/arhgef40/obscna/eps8l3b/rhoab/chn1/arhgef7a/gpr18/p2ry8	51
GO:0051129	GO:0051129	negative regulation of cellular component organization	51/4227	182/17036	0.177747	0.729038	0.683858	tmod1/apc/musk/fbxo5/aurkb/eml2/hormad1/tmod4/sema6e/wnt4b/fbxo43/lgals3b/si:ch211-175f11.5/sptb/sema3d/rgma/mcl1a/sema4ab/jarid2b/sema4e/hnrnpub/unc119b/si:ch211-129c21.1/camsap2a/terf1/sema5a/prmt6/twf1a/si:dkey-108k21.10/si:dkey-108k21.21/zgc:153405/si:ch211-113a14.24/kank2/mdm1/sema3c/add2/histh1l/kank1b/kank1a/gsnb/h1m/sema5bb/si:dkey-23a13.9/si:dkey-23a13.17/si:ch73-368j24.11/si:ch73-368j24…	51
GO:0090504	GO:0090504	epiboly	22/4227	73/17036	0.177819	0.729038	0.683858	map9/diaph2/bves/gdf3/ctsba/bcl2l10/eomesa/dsg2.1/ezrb/rhov/pou5f3/nanog/cyp11a1/fscn1a/flot2a/fzd7b/sdc4/sox19b/cdh1/rhoab/satb2/cacnb4a	22
GO:0031497	GO:0031497	chromatin assembly	19/4227	62/17036	0.178167	0.729038	0.683858	si:dkey-108k21.10/si:dkey-108k21.21/si:ch73-36p18.1/zgc:153405/zgc:110216/si:ch211-113a14.18/si:ch211-113a14.24/smarca1/histh1l/h1m/si:dkey-148h10.5/si:dkey-23a13.9/si:dkey-23a13.17/si:ch73-368j24.11/si:ch73-368j24.12/si:ch1073-153i20.4/zgc:110425/zgc:163061/ttn.2	19
GO:0042180	GO:0042180	cellular ketone metabolic process	19/4227	62/17036	0.178167	0.729038	0.683858	lef1/apc/park7/tysnd1/cyp11c1/rcor1/coq6/cyp17a2/cyp11a2/cyp11a1/si:ch73-141c7.1/coq5/fdx1b/anxa1a/coq4/anxa1b/acaa2/ido1/coq10b	19
GO:0090130	GO:0090130	tissue migration	19/4227	62/17036	0.178167	0.729038	0.683858	syk/plekhg5a/bace2/psenen/kcnj13/slc24a5/sema3d/thsd7aa/ccbe1/itga5/plekhg5b/nrp1a/cald1b/tek/pxna/anxa1a/anxa1b/cdh1/efnb2a	19
GO:0051259	GO:0051259	protein complex oligomerization	37/4227	129/17036	0.178245	0.729038	0.683858	pkd2/kctd7/pfklb/letm1/kcns3a/tnfaip1/usp16/si:dkey-201i6.2/evla/trpm7/kcng4a/si:rp71-39b20.4/kcnb2/pfkpb/scara5/kcns3b/max/kcnf1a/p2rx4a/pfkma/pfkpa/terf1/si:dkey-192j17.1/kcna1a/kctd15a/kcnc3a/shmt1/jmjd6/kcnc2/kcnd2/trpm6/pfkmb/shmt2/aep1/trpm1a/kcna4/tp73	37
GO:0080134	GO:0080134	regulation of response to stress	64/4227	232/17036	0.181213	0.733193	0.687755	pros1/ing2/spred2a/hyou1/dgat2/hmgb1a/tlr8b/becn1/nme5/prpf19/fmr1/rnf169/sarm1/hmgb1b/tnfrsf1a/gpatch3/smyd2a/fam168a/mapk8ip2/herpud1/rgma/dusp22a/spred3/spire1a/sesn2/dusp22b/ripk1l/ripk2/ankrd6b/sh3rf1/plg/tlr5b/tlr5a/hmgb3b/rnf121/si:ch73-63e15.2/pias4a/terf2ip/magi3a/cd40/mapk8ip1a/cav1/mapk8ip3/socs1a/lgals2a/axin1/brd4/helb/irak3/b2m/klhdc10/xbp1/anxa1a/anxa1b/mettl3/hmgb3a/lgr4/serping1/…	64
GO:0006023	GO:0006023	aminoglycan biosynthetic process	14/4227	44/17036	0.181776	0.733193	0.687755	si:dkey-26i13.5/chst12b/b3galt6/chst3b/chst3a/ext1a/b3gnt2b/has3/ext1b/extl2/b3gnt7/xylt1/chst7/glceb	14
GO:0031349	GO:0031349	positive regulation of defense response	14/4227	44/17036	0.181776	0.733193	0.687755	hmgb1a/tlr8b/sarm1/hmgb1b/gpatch3/tlr5b/tlr5a/hmgb3b/cd40/irak3/b2m/hmgb3a/lgr4/ddx58	14
GO:0031032	GO:0031032	actomyosin structure organization	43/4227	152/17036	0.182534	0.733193	0.687755	dmd/tmod1/cnn1a/myo18aa/mef2ca/ect2/slc8a1a/bves/tmod4/cdc42bpaa/smyd2a/prox1a/asb2b/kif23/tpm3/rbm24a/cnn3b/myoc/myh6/rtkn2b/limk1b/csrp1a/si:dkey-178k16.1/obscnb/sept15/flii/flncb/mybpc1/alkbh4/smyd1a/igfn1.3/igfn1.1/sdc4/ache/mybpc3/fhod1/tpcn2/neb/epb41l5/obsl1b/ttn.1/ttn.2/klhl41a	43
GO:0006325	GO:0006325	chromatin organization	101/4227	375/17036	0.18324	0.733193	0.687755	eed/prmt9/ing2/smarcad1b/npm1a/hmgb1a/npm2b/pbrm1/tbl1xr1a/top1l/chd5/setmar/usp22/jmjd1cb/ep300a/waca/supv3l1/zmiz1a/psme4a/aurkb/pcgf1/meis3/rrp8/hmgb1b/usp16/jarid2a/eny2/fbl/smyd2a/mta1/zgc:173742/ehmt2/setdb1a/arid1ab/jarid2b/tada1/tbl1xr1b/kdm4ab/bmi1b/ing5b/chd8/mbd3a/dpf3/hnrnpub/jdp2b/wdr5/hmgb3b/mbd3b/prdm5/top1/dnmt3bb.2/prdm14/prmt6/rag2/kdm7ab/si:dkey-108k21.10/si:dkey-108k21.21/si:c…	101
GO:0021545	GO:0021545	cranial nerve development	17/4227	55/17036	0.184604	0.733193	0.687755	six3b/rest/mdga2a/homer2/dlx5a/chd7/adgrg6/cad/rb1/slit1b/tuba1a/st8sia6/smarca4a/nsfa/foxd3/vax2/chn1	17
GO:0002042	GO:0002042	cell migration involved in sprouting angiogenesis	6/4227	16/17036	0.184625	0.733193	0.687755	syk/itga5/nrp1a/anxa1a/anxa1b/efnb2a	6
GO:0009743	GO:0009743	response to carbohydrate	6/4227	16/17036	0.184625	0.733193	0.687755	khk/rfx6/hmgn3/nos2a/ache/ano1	6
GO:0009746	GO:0009746	response to hexose	6/4227	16/17036	0.184625	0.733193	0.687755	khk/rfx6/hmgn3/nos2a/ache/ano1	6
GO:0030497	GO:0030497	fatty acid elongation	6/4227	16/17036	0.184625	0.733193	0.687755	elovl6l/elovl1a/elovl4b/elovl7a/elovl8b/elovl7b	6
GO:0031348	GO:0031348	negative regulation of defense response	6/4227	16/17036	0.184625	0.733193	0.687755	gpatch3/pias4a/socs1a/irak3/b2m/mettl3	6
GO:0034284	GO:0034284	response to monosaccharide	6/4227	16/17036	0.184625	0.733193	0.687755	khk/rfx6/hmgn3/nos2a/ache/ano1	6
GO:0035469	GO:0035469	determination of pancreatic left/right asymmetry	6/4227	16/17036	0.184625	0.733193	0.687755	rargb/dld/fgfr2/sept6/gmnn/ccdc151	6
GO:0042559	GO:0042559	pteridine-containing compound biosynthetic process	6/4227	16/17036	0.184625	0.733193	0.687755	qdpra/mthfd1b/zgc:153031/mthfd1l/spra/mthfs	6
GO:0050821	GO:0050821	protein stabilization	6/4227	16/17036	0.184625	0.733193	0.687755	cdc37l1/park7/meis1b/gapdh/hsp90aa1.2/szl	6
GO:0051788	GO:0051788	response to misfolded protein	6/4227	16/17036	0.184625	0.733193	0.687755	dnajb14/dnajb12b/dnajb12a/uggt1/sdf2/sdf2l1	6
GO:0060998	GO:0060998	regulation of dendritic spine development	6/4227	16/17036	0.184625	0.733193	0.687755	dbnla/fmr1/arf6a/dbn1/caprin2/si:dkey-40c11.2	6
GO:0061337	GO:0061337	cardiac conduction	6/4227	16/17036	0.184625	0.733193	0.687755	trpm4b.1/scn3b/scn1ba/scn1bb/prrx1a/trpm4a	6
GO:0071218	GO:0071218	cellular response to misfolded protein	6/4227	16/17036	0.184625	0.733193	0.687755	dnajb14/dnajb12b/dnajb12a/uggt1/sdf2/sdf2l1	6
GO:1901070	GO:1901070	guanosine-containing compound biosynthetic process	6/4227	16/17036	0.184625	0.733193	0.687755	nme2a/nme5/gmps/prtfdc1/impdh2/nme8	6
GO:2001243	GO:2001243	negative regulation of intrinsic apoptotic signaling pathway	6/4227	16/17036	0.184625	0.733193	0.687755	hyou1/nme5/herpud1/mcl1a/vax2/cerkl	6
GO:0001817	GO:0001817	regulation of cytokine production	20/4227	66/17036	0.184798	0.733193	0.687755	hmgb1a/tlr8b/trpm4b.1/panx1a/zbtb16b/hmgb1b/gpatch3/tnfrsf21/tlr5b/tlr5a/pias4a/sulf1/scamp5a/trpm4a/irak3/anxa1a/anxa1b/lgr4/zgc:153759/ddx58	20
GO:0048232	GO:0048232	male gamete generation	20/4227	66/17036	0.184798	0.733193	0.687755	tsga10/psme4a/nme5/hormad1/iqcg/spaca4l/mei4/sass6/amh/si:ch211-225h24.2/abhd2b/sycp3/hsf5/mettl3/dnaaf1/lgr4/m1ap/spata6/ggt1a/piwil1	20
GO:0051236	GO:0051236	establishment of RNA localization	20/4227	66/17036	0.184798	0.733193	0.687755	pcid2/ltv1/ddx19/thoc3/si:dkeyp-97b10.3/nmd3/eny2/igf2bp3/thoc1/ndc1/sdad1/slbp2/ncbp2/rrs1/thoc5/snupn/igf2bp1/gle1/nup35/upf3a	20
GO:0048262	GO:0048262	determination of dorsal/ventral asymmetry	12/4227	37/17036	0.186361	0.737554	0.691847	ift46/robo3/ppp4cb/gdf6a/sybu/eomesa/ctnnb2/ankrd6b/max/szl/ppp4ca/bmpr1ba	12
GO:0061351	GO:0061351	neural precursor cell proliferation	12/4227	37/17036	0.186361	0.737554	0.691847	melk/fgfr2/cetn4/sirt2/nf1a/trim71/sema3d/chd8/zic4/gas2l3/scrt2/zic2a	12
GO:0030900	GO:0030900	forebrain development	40/4227	141/17036	0.187369	0.739699	0.693858	arl13b/lef1/dla/tdgf1/lhx6/auts2a/bsx/hmgb1a/foxh1/tcf7l2/pitx3/cetn4/pitx2/pcdh10b/dixdc1a/alcamb/prox1a/hey1/wls/lhx8a/chd8/notch1a/otpa/fzd8a/csrnp1b/pax6a/sox10/nsfa/axin1/yaf2/dzip1/nr4a2b/etv5b/ntn1a/sox14/sec61a1/vax2/mettl3/fgf3/zic2a	40
GO:0045596	GO:0045596	negative regulation of cell differentiation	40/4227	141/17036	0.187369	0.739699	0.693858	musk/id1/srgap2/llgl2/loxl3b/npas4l/loxl3a/smyd5/rest/sirt2/sema6e/id2a/sema3d/rgma/sema4ab/irf4a/sema4e/klf2b/enpp1/id2b/notch1a/si:ch211-129c21.1/hoxc9a/sema5a/skilb/sox10/lpar2a/sema3c/anxa1a/anxa1b/her7/sema5bb/si:cabz01029535.1/her8a/spi1b/skor1a/rbpms2b/bmp15/fgf17/dlx1a	40
GO:0048678	GO:0048678	response to axon injury	10/4227	30/17036	0.189637	0.745307	0.699119	dpysl2b/hmgb1a/sarm1/ptena/rgma/b3gat1a/dpysl3/lingo1a/cnp/lrp4	10
GO:0052652	GO:0052652	cyclic purine nucleotide metabolic process	10/4227	30/17036	0.189637	0.745307	0.699119	si:dkey-37g12.1/gucy2f/adcy3a/adcy2a/si:ch211-132f19.7/adcy2b/adcy1a/si:dkey-206f10.1/adcy7/adcy5	10
GO:0060993	GO:0060993	kidney morphogenesis	10/4227	30/17036	0.189637	0.745307	0.699119	pkd2/tdgf1/pax2a/klhl3/nek8/sept15/irx3b/glis2b/gdnfb/ttc26	10
GO:0043049	GO:0043049	otic placode formation	8/4227	23/17036	0.190196	0.745307	0.699119	sox9a/pax2a/msx1a/bmper/sox9b/gata3/tfap2c/fgf3	8
GO:0045637	GO:0045637	regulation of myeloid cell differentiation	8/4227	23/17036	0.190196	0.745307	0.699119	tfe3b/smyd5/irf4a/lpar3/myb/spi1a/lpar2a/spi1b	8
GO:0046364	GO:0046364	monosaccharide biosynthetic process	8/4227	23/17036	0.190196	0.745307	0.699119	g6pc3/maea/gpib/arpp19a/pcxa/fam3a/fam3c/pcxb	8
GO:0021675	GO:0021675	nerve development	21/4227	70/17036	0.190986	0.74748	0.701158	en1b/six3b/rest/alcamb/ctbp2a/mdga2a/homer2/dlx5a/chd7/adgrg6/cad/rb1/slit1b/ngfa/tuba1a/st8sia6/smarca4a/nsfa/foxd3/vax2/chn1	21
GO:0042981	GO:0042981	regulation of apoptotic process	112/4227	419/17036	0.193375	0.755899	0.709055	melk/ing2/tiprl/apc/si:ch211-57m13.9/pmaip1/sppl3/npm1a/hyou1/trim69/si:dkey-85p17.3/si:ch211-122l14.7/park7/si:ch1073-526c11.3/pimr46/heatr1/socs3b/pimr47/supv3l1/si:ch211-202m22.1/vip/aurkb/nme5/maea/gdf9/pimr212/sirt2/bbc3/psenen/pimr209/pimr108/gdf3/foxo3a/lgals3b/pimr175/pimr168/pimr60/pimr62/herpud1/bcl2l13/si:ch211-160d20.5/bcl2l10/pimr179/mcl1a/tnfaip8l2a/pimr82/bcl10/ripk2/pimr141/pimr54…	112
GO:0010927	GO:0010927	cellular component assembly involved in morphogenesis	33/4227	115/17036	0.193802	0.756636	0.709745	dmd/tmod1/myo18aa/mef2ca/slc8a1a/bves/tmod4/smyd2a/prox1a/asb2b/tpm3/rbm24a/adgrg6/myh6/wwtr1/csrp1a/obscnb/sept15/cntnap1/flii/flncb/mybpc1/smyd1a/igfn1.3/igfn1.1/ache/mybpc3/tpcn2/neb/obsl1b/ttn.1/ttn.2/klhl41a	33
GO:0009952	GO:0009952	anterior/posterior pattern specification	66/4227	241/17036	0.19493	0.760106	0.713	lef1/apc/tdgf1/smad2/sbno1/hoxc6b/foxh1/zbtb4/dld/pax2a/rtf1/nin/fmr1/pcdh10b/pdlim7/dlc/rspo3/kcnh1a/bcl2l10/foxa3/cfap20/hoxa4a/hoxa3a/hey1/cap1/rbm24a/wls/chd7/buc/rnf152/en2b/hes6/notch1a/pou5f3/kcnh1b/wwtr1/wnt10b/wnt1/itga5/hoxc3a/hoxc6a/hoxc5a/hoxc4a/sulf1/pax6a/cav1/hoxb5a/hoxb3a/hoxb4a/rarab/axin1/ripply2/pxna/smarca1/myhz1.1/her7/tbx19/vangl2/her8a/slc7a6os/fgf3/mapk14a/fgf17/hoxd3a/hox…	66
GO:0010769	GO:0010769	regulation of cell morphogenesis involved in differentiation	34/4227	119/17036	0.197278	0.764137	0.716781	musk/dpysl2b/dbnla/cdkl5/fmr1/sema6e/pak1/sema3d/ncaldb/sema4ab/pard6gb/col15a1b/sema4e/nkx6.1/arl3l1/dbn1/si:ch211-129c21.1/pik3cd/nrp1a/sema5a/lrrc4bb/plxnb2a/caprin2/plxnc1/sema3c/si:dkey-40c11.2/plxna1b/sema5bb/ntn1a/plxnb1b/vax2/rbpms2b/zmp:0000001168/mapk14a	34
GO:0044270	GO:0044270	cellular nitrogen compound catabolic process	68/4227	249/17036	0.198055	0.764137	0.716781	pcid2/exosc9/tet2/dis3/patl1/pgam1b/parn/smg8/dcps/pde12/pfklb/heatr1/csdc2a/supv3l1/tbp/vip/dnd1/fmr1/hnrnpa0a/exosc3/mettl16/gapdh/gapdhs/eno4/xdh/zfp36l1a/aldh6a1/syncripl/gpib/pkma/uraha/exosc7/ago3b/pabpc1b/lin28a/rbm24a/exosc4/pfkpb/nt5e/zfp36l1b/enpp1/hnrnpub/rexo4/pgam2/ncl/ncbp2/exosc10/pm20d1.2/zgc:103759/pfkma/eno3/pfkpa/fen1/pkmb/cnp/hmox1a/carhsp1/snd1/exosc2/scn1lab/pfkmb/cth1/mettl…	68
GO:0060042	GO:0060042	retina morphogenesis in camera-type eye	30/4227	104/17036	0.198463	0.764137	0.716781	reep6/pcdh17/pde6c/meis1b/atp6v0e1/ift80/bves/gdf6a/marcksb/foxg1a/ehmt2/top2b/znf644a/cdh6/insm1a/rx1/dnmt3bb.2/pax6a/smarca4a/cdipt/socs1a/dnmt1/foxn4/rp2/six7/vax2/fgf3/epb41l5/zic2a/cerkl	30
GO:0009119	GO:0009119	ribonucleoside metabolic process	19/4227	63/17036	0.198879	0.764137	0.716781	nme2a/adkb/adka/nt5c1ba/nme5/nt5c1ab/gmps/uck2b/prtfdc1/cad/uck1/uckl1b/ak4/dhodh/uck2a/ahcyl1/impdh2/umps/nme8	19
GO:0021517	GO:0021517	ventral spinal cord development	16/4227	52/17036	0.199444	0.764137	0.716781	dla/dld/dlc/nkx2.9/dab1b/insm1a/notch1a/otpa/nkx6.1/gata3/tal2/nos1/foxn4/notch1b/lhx3/evx2	16
GO:0051170	GO:0051170	import into nucleus	16/4227	52/17036	0.199444	0.764137	0.716781	kpnb3/kpna7/ipo9/kpna4/nutf2/kpnb1/kpna1/snupn/tnpo2/kpna2/tnpo3/rpain/dzip1/heatr3/nup35/pttg1ipb	16
GO:0000291	GO:0000291	nuclear-transcribed mRNA catabolic process, exonucleolytic	5/4227	13/17036	0.20126	0.764137	0.716781	exosc9/exosc3/exosc7/exosc4/exosc2	5
GO:0001843	GO:0001843	neural tube closure	5/4227	13/17036	0.20126	0.764137	0.716781	tdgf1/dvl1b/phactr4b/vaspb/shroom3	5
GO:0006044	GO:0006044	N-acetylglucosamine metabolic process	5/4227	13/17036	0.20126	0.764137	0.716781	chst3b/chst3a/chst2a/mgat3a/chst7	5
GO:0010634	GO:0010634	positive regulation of epithelial cell migration	5/4227	13/17036	0.20126	0.764137	0.716781	syk/nrp1a/tek/anxa1a/anxa1b	5
GO:0030204	GO:0030204	chondroitin sulfate metabolic process	5/4227	13/17036	0.20126	0.764137	0.716781	si:dkey-26i13.5/chst12b/chst3b/chst3a/chst7	5
GO:0031060	GO:0031060	regulation of histone methylation	5/4227	13/17036	0.20126	0.764137	0.716781	ehmt2/jarid2b/dnmt3bb.2/prmt6/phf19	5
GO:0045445	GO:0045445	myoblast differentiation	5/4227	13/17036	0.20126	0.764137	0.716781	mapk14b/tcf7l2/rbm24a/myf6/mapk14a	5
GO:0046627	GO:0046627	negative regulation of insulin receptor signaling pathway	5/4227	13/17036	0.20126	0.764137	0.716781	si:ch211-25d12.7/pid1/grb10a/socs1a/socs2	5
GO:0050870	GO:0050870	positive regulation of T cell activation	5/4227	13/17036	0.20126	0.764137	0.716781	hhla2b.2/hhla2b.1/gata3/anxa1a/anxa1b	5
GO:0051224	GO:0051224	negative regulation of protein transport	5/4227	13/17036	0.20126	0.764137	0.716781	cep131/tnfrsf21/anxa1a/anxa1b/lgr4	5
GO:0062013	GO:0062013	positive regulation of small molecule metabolic process	5/4227	13/17036	0.20126	0.764137	0.716781	arpp19a/nos1/anxa1a/nos2a/anxa1b	5
GO:0070365	GO:0070365	hepatocyte differentiation	5/4227	13/17036	0.20126	0.764137	0.716781	apc/e2f7/anxa1a/anxa1b/e2f8	5
GO:0071698	GO:0071698	olfactory placode development	5/4227	13/17036	0.20126	0.764137	0.716781	homer2/dlx5a/st8sia6/axin1/tfap2c	5
GO:1900077	GO:1900077	negative regulation of cellular response to insulin stimulus	5/4227	13/17036	0.20126	0.764137	0.716781	si:ch211-25d12.7/pid1/grb10a/socs1a/socs2	5
GO:1903039	GO:1903039	positive regulation of leukocyte cell-cell adhesion	5/4227	13/17036	0.20126	0.764137	0.716781	hhla2b.2/hhla2b.1/gata3/anxa1a/anxa1b	5
GO:1904950	GO:1904950	negative regulation of establishment of protein localization	5/4227	13/17036	0.20126	0.764137	0.716781	cep131/tnfrsf21/anxa1a/anxa1b/lgr4	5
GO:0055001	GO:0055001	muscle cell development	57/4227	207/17036	0.201544	0.764137	0.716781	mbnl2/dmd/tmod1/gne/lef1/apc/mat2aa/myo18aa/mef2ca/myh7ba/slc8a1a/fkrp/bves/pomgnt2/tmod4/gdf6a/cyp26c1/smyd2a/prox1a/asb2b/gas8/tpm3/rbm24a/akap12b/myh6/gmppb/csrp1a/cavin4b/obscnb/ccdc78/ambra1b/sept15/lgals2a/carm1/flii/axin1/scube1/flncb/mybpc1/myf6/myhz2/smyd1a/rbfox2/tomm70a/igfn1.3/igfn1.1/vangl2/dysf/ache/mybpc3/tpcn2/nexn/neb/obsl1b/ttn.1/ttn.2/klhl41a	57
GO:0009187	GO:0009187	cyclic nucleotide metabolic process	11/4227	34/17036	0.20287	0.764137	0.716781	si:dkey-37g12.1/gucy2f/adcy3a/adcy2a/si:ch211-132f19.7/adcy2b/adcy1a/si:dkey-206f10.1/cnp/adcy7/adcy5	11
GO:0018208	GO:0018208	peptidyl-proline modification	11/4227	34/17036	0.20287	0.764137	0.716781	p4ha1a/p4ha1b/crtap/ppil6/p4ha2/ppib/ntmt1/ppil1/p4htm/ogfod1/ftr52p	11
GO:0030282	GO:0030282	bone mineralization	11/4227	34/17036	0.20287	0.764137	0.716781	galnt2/ptk2ba/chd7/enpp1/atraid/omd/ano6/abcc6a/mst1/lgr4/shox	11
GO:1901568	GO:1901568	fatty acid derivative metabolic process	11/4227	34/17036	0.20287	0.764137	0.716781	elovl6l/hmgcl/elovl1a/ptgs2a/oxct1b/elovl4b/anxa1a/anxa1b/elovl7a/oxct1a/elovl7b	11
GO:0014031	GO:0014031	mesenchymal cell development	36/4227	127/17036	0.20382	0.764137	0.716781	radil/lef1/esf1/dla/rtf1/lbh/polr1a/anxa6/meis3/masp1/sema6e/phactr4b/wtip/pak1/sema3d/sema4ab/chd7/sema4e/nrg2a/si:ch211-129c21.1/nrp1a/sema5a/sox10/atp6v0a1a/smarca4a/fscn1a/olfm2a/cax1/sema3c/tbx1/sema5bb/foxd3/tfap2c/fgf3/zic2a/dhrs9	36
GO:0014032	GO:0014032	neural crest cell development	36/4227	127/17036	0.20382	0.764137	0.716781	radil/lef1/esf1/dla/rtf1/lbh/polr1a/anxa6/meis3/masp1/sema6e/phactr4b/wtip/pak1/sema3d/sema4ab/chd7/sema4e/nrg2a/si:ch211-129c21.1/nrp1a/sema5a/sox10/atp6v0a1a/smarca4a/fscn1a/olfm2a/cax1/sema3c/tbx1/sema5bb/foxd3/tfap2c/fgf3/zic2a/dhrs9	36
GO:0048864	GO:0048864	stem cell development	36/4227	127/17036	0.20382	0.764137	0.716781	radil/lef1/esf1/dla/rtf1/lbh/polr1a/anxa6/meis3/masp1/sema6e/phactr4b/wtip/pak1/sema3d/sema4ab/chd7/sema4e/nrg2a/si:ch211-129c21.1/nrp1a/sema5a/sox10/atp6v0a1a/smarca4a/fscn1a/olfm2a/cax1/sema3c/tbx1/sema5bb/foxd3/tfap2c/fgf3/zic2a/dhrs9	36
GO:0023061	GO:0023061	signal release	32/4227	112/17036	0.20595	0.764137	0.716781	rfx3/mtnr1bb/rap1ab/park7/tcf7l2/vip/stx3a/cplx2/mtnr1ba/rims2a/ica1/stx11a/snap25b/trpm7/cplx3b/mctp2a/slc44a4/rims3/wls/slc6a9/rfx6/napbb/stx2a/nkx6.1/amh/hmgn3/syt12/syt9b/anxa1a/anxa1b/mctp2b/ano1	32
GO:0071103	GO:0071103	DNA conformation change	32/4227	112/17036	0.20595	0.764137	0.716781	ncapd3/top1l/psme4a/ercc2/zgc:173742/top2b/pif1/top1/top1mt/si:dkey-108k21.10/si:dkey-108k21.21/si:ch73-36p18.1/zgc:153405/zgc:110216/si:ch211-113a14.18/si:ch211-113a14.24/smarca1/anxa1a/histh1l/anxa1b/h1m/mcm6/si:dkey-148h10.5/si:dkey-23a13.9/si:dkey-23a13.17/si:ch73-368j24.11/si:ch73-368j24.12/si:ch1073-153i20.4/zgc:110425/zgc:163061/piwil1/ttn.2	32
GO:0042133	GO:0042133	neurotransmitter metabolic process	14/4227	45/17036	0.20697	0.764137	0.716781	comtb/aldh5a1/slc44a4/rnf180/tph1a/shmt1/nos1/nos2a/gldc/gad1b/shmt2/ache/amt/hnmt	14
GO:0043647	GO:0043647	inositol phosphate metabolic process	14/4227	45/17036	0.20697	0.764137	0.716781	ipmkb/plcd3b/ptenb/ptena/si:ch211-260p9.3/plcd1b/itpkb/itpkca/ippk/impa2/plcd1a/inpp5jb/inpp5l/plcd4b	14
GO:0048483	GO:0048483	autonomic nervous system development	14/4227	45/17036	0.20697	0.764137	0.716781	phox2bb/rest/meis3/phactr4b/mdga2a/sema3d/chd8/cad/mapk10/sox10/fscn1a/sema3c/foxd3/chn1	14
GO:0006506	GO:0006506	GPI anchor biosynthetic process	9/4227	27/17036	0.207123	0.764137	0.716781	pigo/pigv/pgap2/pigs/mppe1/pign/pigm/pigw/piga	9
GO:0010810	GO:0010810	regulation of cell-substrate adhesion	9/4227	27/17036	0.207123	0.764137	0.716781	ddr2b/emilin2a/myoc/emilin1a/ecm2/si:dkey-32e6.6/ek1/emilin2b/si:dkey-6n6.1	9
GO:0030278	GO:0030278	regulation of ossification	9/4227	27/17036	0.207123	0.764137	0.716781	mef2ca/galnt2/rest/ptk2ba/enpp1/atraid/omd/ano6/abcc6a	9
GO:0030916	GO:0030916	otic vesicle formation	9/4227	27/17036	0.207123	0.764137	0.716781	sox9a/pax2a/msx1a/sparc/bmper/sox9b/gata3/tfap2c/fgf3	9
GO:0038083	GO:0038083	peptidyl-tyrosine autophosphorylation	9/4227	27/17036	0.207123	0.764137	0.716781	si:ch211-167j9.5/ptk2ab/si:ch73-340m8.2/ptk2ba/yrk/tnk2b/yes1/tec/tnk1	9
GO:0039021	GO:0039021	pronephric glomerulus development	9/4227	27/17036	0.207123	0.764137	0.716781	tdgf1/pax2a/osr1/tmem234/kirrel3l/nphs2/vcana/usp40/p4htm	9
GO:0051961	GO:0051961	negative regulation of nervous system development	24/4227	82/17036	0.207312	0.764137	0.716781	musk/id1/srgap2/rest/sirt2/sema6e/id2a/sema3d/rgma/sema4ab/sema4e/id2b/tnfrsf21/notch1a/si:ch211-129c21.1/sema5a/sox10/sema3c/her7/sema5bb/si:cabz01029535.1/her8a/dlx1a/gpr161	24
GO:0001818	GO:0001818	negative regulation of cytokine production	7/4227	20/17036	0.208226	0.764137	0.716781	gpatch3/tnfrsf21/pias4a/irak3/anxa1a/anxa1b/lgr4	7
GO:0002097	GO:0002097	tRNA wobble base modification	7/4227	20/17036	0.208226	0.764137	0.716781	alkbh8/elp2/dph3/elp4/ctu2/ctu1/adat3	7
GO:0010565	GO:0010565	regulation of cellular ketone metabolic process	7/4227	20/17036	0.208226	0.764137	0.716781	lef1/apc/tysnd1/rcor1/anxa1a/anxa1b/acaa2	7
GO:0048538	GO:0048538	thymus development	7/4227	20/17036	0.208226	0.764137	0.716781	ndrg1b/sema3d/chd7/nrp1a/rag2/tbl3/tbx1	7
GO:0051294	GO:0051294	establishment of spindle orientation	7/4227	20/17036	0.208226	0.764137	0.716781	ndel1a/llgl2/wtip/llgl1/ndel1b/ccdc151/vangl2	7
GO:0060034	GO:0060034	notochord cell differentiation	7/4227	20/17036	0.208226	0.764137	0.716781	dla/vps18/rab32a/cav1/atp6v1e1b/ngs/atp6v1f	7
GO:0072114	GO:0072114	pronephros morphogenesis	7/4227	20/17036	0.208226	0.764137	0.716781	pkd2/pax2a/nek8/sept15/irx3b/glis2b/ttc26	7
GO:0090307	GO:0090307	mitotic spindle assembly	7/4227	20/17036	0.208226	0.764137	0.716781	map9/ewsr1a/si:ch1073-266p11.2/aurkb/kif23/hnrnpub/birc5b	7
GO:2001242	GO:2001242	regulation of intrinsic apoptotic signaling pathway	7/4227	20/17036	0.208226	0.764137	0.716781	hyou1/nme5/herpud1/mcl1a/ddit3/vax2/cerkl	7
GO:0006732	GO:0006732	coenzyme metabolic process	56/4227	204/17036	0.211502	0.766423	0.718926	mdh1b/pgam1b/mat2aa/pfklb/pank2/elovl6l/qdpra/mettl16/gapdh/gapdhs/eno4/acss1/coq6/mthfd1b/gpib/pkma/nnt2/zgc:153031/si:dkey-145c18.3/si:dkey-145c18.2/acot11a/elovl1a/pfkpb/mthfd1l/pgam2/nadk2/zgc:171566/gpd1b/pfkma/nmnat1/elovl4b/eno3/pfkpa/coasy/dcakd/pkmb/si:ch73-141c7.1/shmt1/acot15/coq5/mvk/pdha1a/coq4/spra/scn1lab/pfkmb/shmt2/mthfs/mcee/nudt12/elovl7a/ahcyl1/ido1/coq10b/pfkla/elovl7b	56
GO:0000280	GO:0000280	nuclear division	44/4227	158/17036	0.211646	0.766423	0.718926	ncapd3/map9/bora/ewsr1a/pmaip1/meiob/ercc4/eme1/ndel1a/pdcd2/mad2l1bp/fbxo5/si:ch1073-266p11.2/aurkb/msh5/usp16/dscc1/hormad1/wnt4b/gnl2/fbxo43/msh4/kif23/mcl1a/top2b/cdca8/cdc14aa/ppp1r7/hfm1/mei4/anapc4/hnrnpub/sass6/birc5b/smc1a/syce2/ndel1b/ccnb1/aurka/terb2/cdt1/m1ap/cdc14b/rmi1	44
GO:0030258	GO:0030258	lipid modification	39/4227	139/17036	0.212725	0.766423	0.718926	pi4k2a/plppr1/plpp5/tpte/pik3c2b/si:ch211-25d12.7/ptenb/tysnd1/acoxl/mtmr7a/ptena/hadhab/pik3c2a/acadl/acadm/echdc2/hadhaa/mtmr1b/plpp2b/pik3cd/zgc:158659/impa2/socs1a/eci1/phyh/socs2/gbgt1l1/gbgt1l2/gbgt1l4/inpp5e/inpp5jb/acox1/si:dkey-172j4.3/acox3/pi4kab/acaa2/cpt2/inpp5l/dgkh	39
GO:0031099	GO:0031099	regeneration	51/4227	185/17036	0.214121	0.766423	0.718926	lef1/glis3/dpysl2b/hmgb1a/hoxc13b/prph/si:ch1073-278o19.1/becn1/six3b/galnt2/jag1b/ide/hbegfa/tnfrsf1a/ptena/ctsba/pepd/sema3d/rgma/b3gat1a/krt17/lin28a/insm1a/pou5f3/cldnc/prdx5/mgat5/csrp1a/acvr1ba/hoxc13a/pou6f2/lingo1a/cav1/c2cd4a/cnp/smarca4a/axin1/sox9b/atp6v1e1b/klhl42/gata3/anxa1a/anxa1b/notch1b/mustn1a/mdka/lrp4/notch2/hspd1/neurod1/agr1	51
GO:0015718	GO:0015718	monocarboxylic acid transport	18/4227	60/17036	0.214185	0.766423	0.718926	slc27a1b/slc27a4/slc16a9b/slc16a12b/slc16a8/slc16a3/mfsd2aa/oc90/slc10a4/vps18/slc10a1/si:ch211-234h8.7/slc16a6b/zgc:92162/anxa1a/anxa1b/slc16a4/zgc:165507	18
GO:0055006	GO:0055006	cardiac cell development	18/4227	60/17036	0.214185	0.766423	0.718926	mat2aa/mef2ca/cyp26c1/asb2b/myh6/fbn2b/sept15/mybpc1/rbfox2/tomm70a/igfn1.3/igfn1.1/mybpc3/nexn/neb/obsl1b/ttn.1/ttn.2	18
GO:0055008	GO:0055008	cardiac muscle tissue morphogenesis	12/4227	38/17036	0.214409	0.766423	0.718926	fbxo32/klf2b/dpf3/nrg2a/wwtr1/mybpc1/igfn1.3/igfn1.1/mybpc3/obsl1b/ttn.1/ttn.2	12
GO:0044242	GO:0044242	cellular lipid catabolic process	30/4227	105/17036	0.215176	0.766423	0.718926	slc27a4/smpd1/acads/tysnd1/acoxl/gm2a/bco2b/enpp2/galcb/hadhab/acadl/acadm/galca/echdc2/si:ch73-21k16.1/hadhaa/smpd4/neu3.2/abhd2b/gdpd3a/eci1/pdxdc1/phyh/pnpla3/acox1/gba2/acox3/acaa2/cpt2/lipg	30
GO:0007088	GO:0007088	regulation of mitotic nuclear division	15/4227	49/17036	0.215719	0.766423	0.718926	bora/ewsr1a/pmaip1/pdcd2/mad2l1bp/fbxo5/aurkb/wnt4b/gnl2/mcl1a/cdc14aa/ppp1r7/anapc4/hnrnpub/cdc14b	15
GO:0030522	GO:0030522	intracellular receptor signaling pathway	15/4227	49/17036	0.215719	0.766423	0.718926	pknox1.2/apc/nr1d4b/rargb/esr2b/pitx2/crabp2a/gpatch3/rxraa/wwtr1/rarab/carm1/thraa/zic2a/ddx58	15
GO:1901606	GO:1901606	alpha-amino acid catabolic process	22/4227	75/17036	0.216684	0.766423	0.718926	zgc:92040/oat/qdpra/sdsl/hmgcl/tdh2/aldh6a1/got2a/si:ch211-256m1.8/gcat/shmt1/prodhb/nos1/dao.2/nos2a/gldc/shmt2/fah/got2b/gls2a/amt/ido1	22
GO:0043067	GO:0043067	regulation of programmed cell death	112/4227	422/17036	0.218038	0.766423	0.718926	melk/ing2/tiprl/apc/si:ch211-57m13.9/pmaip1/sppl3/npm1a/hyou1/trim69/si:dkey-85p17.3/si:ch211-122l14.7/park7/si:ch1073-526c11.3/pimr46/heatr1/socs3b/pimr47/supv3l1/si:ch211-202m22.1/vip/aurkb/nme5/maea/gdf9/pimr212/sirt2/bbc3/psenen/pimr209/pimr108/gdf3/foxo3a/lgals3b/pimr175/pimr168/pimr60/pimr62/herpud1/bcl2l13/si:ch211-160d20.5/bcl2l10/pimr179/mcl1a/tnfaip8l2a/pimr82/bcl10/ripk2/pimr141/pimr54…	112
GO:0051260	GO:0051260	protein homooligomerization	31/4227	109/17036	0.218849	0.766423	0.718926	kctd7/pfklb/letm1/kcns3a/tnfaip1/usp16/si:dkey-201i6.2/evla/kcng4a/si:rp71-39b20.4/kcnb2/pfkpb/scara5/kcns3b/kcnf1a/p2rx4a/pfkma/pfkpa/terf1/si:dkey-192j17.1/kcna1a/kctd15a/kcnc3a/shmt1/jmjd6/kcnc2/kcnd2/pfkmb/shmt2/aep1/kcna4	31
GO:0006605	GO:0006605	protein targeting	36/4227	128/17036	0.219096	0.766423	0.718926	zgc:77880/vps37a/spcs3/timm10/golga7ba/golga7/zdhhc4/slc9a3r1a/lamp2/zdhhc24/si:ch211-210b2.2/timm50/sec61b/srp14/zdhhc7/agk/tomm7/zdhhc18b/sec62/akap12b/pex3/tram2/efhc1/timm13/tram1/zdhhc23b/zdhhc20b/mief1/samm50l/pmpca/chchd4b/sec61a1/sec61a1l/grpel1/dnajc15/hspd1	36
GO:0045892	GO:0045892	negative regulation of transcription, DNA-templated	114/4227	430/17036	0.21961	0.766423	0.718926	eed/lef1/junba/pnx/smad2/per1a/smad9/nr2f1b/nr1d4b/rargb/id1/maf1/sox13/foxh1/hexim1/six3b/osr1/aurkb/dpf2l/rest/sirt2/rrp8/zbtb16b/erfl3/atxn1b/osr2/foxo3a/si:ch211-160f23.5/gcfc2/smyd2a/prox1a/id2a/mta1/ccpg1/tshz3a/tcf25/eomesa/setdb1a/zfpm2b/nr1d2b/jarid2b/hey1/bmi1b/mycb/chd8/homeza/hes6/mbd3a/si:dkeyp-68b7.7/vrtn/dpf3/si:ch211-195d17.2/id2b/hnrnpub/insm1a/si:ch73-299h12.8/rxraa/rb1/nfia/mbd…	114
GO:1902679	GO:1902679	negative regulation of RNA biosynthetic process	114/4227	430/17036	0.21961	0.766423	0.718926	eed/lef1/junba/pnx/smad2/per1a/smad9/nr2f1b/nr1d4b/rargb/id1/maf1/sox13/foxh1/hexim1/six3b/osr1/aurkb/dpf2l/rest/sirt2/rrp8/zbtb16b/erfl3/atxn1b/osr2/foxo3a/si:ch211-160f23.5/gcfc2/smyd2a/prox1a/id2a/mta1/ccpg1/tshz3a/tcf25/eomesa/setdb1a/zfpm2b/nr1d2b/jarid2b/hey1/bmi1b/mycb/chd8/homeza/hes6/mbd3a/si:dkeyp-68b7.7/vrtn/dpf3/si:ch211-195d17.2/id2b/hnrnpub/insm1a/si:ch73-299h12.8/rxraa/rb1/nfia/mbd…	114
GO:1903507	GO:1903507	negative regulation of nucleic acid-templated transcription	114/4227	430/17036	0.21961	0.766423	0.718926	eed/lef1/junba/pnx/smad2/per1a/smad9/nr2f1b/nr1d4b/rargb/id1/maf1/sox13/foxh1/hexim1/six3b/osr1/aurkb/dpf2l/rest/sirt2/rrp8/zbtb16b/erfl3/atxn1b/osr2/foxo3a/si:ch211-160f23.5/gcfc2/smyd2a/prox1a/id2a/mta1/ccpg1/tshz3a/tcf25/eomesa/setdb1a/zfpm2b/nr1d2b/jarid2b/hey1/bmi1b/mycb/chd8/homeza/hes6/mbd3a/si:dkeyp-68b7.7/vrtn/dpf3/si:ch211-195d17.2/id2b/hnrnpub/insm1a/si:ch73-299h12.8/rxraa/rb1/nfia/mbd…	114
GO:0000054	GO:0000054	ribosomal subunit export from nucleus	4/4227	10/17036	0.219701	0.766423	0.718926	ltv1/nmd3/sdad1/rrs1	4
GO:0002138	GO:0002138	retinoic acid biosynthetic process	4/4227	10/17036	0.219701	0.766423	0.718926	lef1/apc/rcor1/rdh10b	4
GO:0002474	GO:0002474	antigen processing and presentation of peptide antigen via MHC class I	4/4227	10/17036	0.219701	0.766423	0.718926	b2m/erap1b/erap2/b2ml	4
GO:0003229	GO:0003229	ventricular cardiac muscle tissue development	4/4227	10/17036	0.219701	0.766423	0.718926	klf2b/nrg2a/wwtr1/mybpc3	4
GO:0006228	GO:0006228	UTP biosynthetic process	4/4227	10/17036	0.219701	0.766423	0.718926	nme2a/nme5/cad/nme8	4
GO:0006563	GO:0006563	L-serine metabolic process	4/4227	10/17036	0.219701	0.766423	0.718926	sdsl/shmt1/shmt2/phgdh	4
GO:0006882	GO:0006882	cellular zinc ion homeostasis	4/4227	10/17036	0.219701	0.766423	0.718926	slc30a4/slc39a7/slc39a6/slc39a13	4
GO:0007158	GO:0007158	neuron cell-cell adhesion	4/4227	10/17036	0.219701	0.766423	0.718926	nlgn2b/nlgn3a/nlgn3b/nlgn2a	4
GO:0030212	GO:0030212	hyaluronan metabolic process	4/4227	10/17036	0.219701	0.766423	0.718926	itih3a/itih1/has3/itih5	4
GO:0032506	GO:0032506	cytokinetic process	4/4227	10/17036	0.219701	0.766423	0.718926	ect2/aurkb/kif23/rtkn2b	4
GO:0033750	GO:0033750	ribosome localization	4/4227	10/17036	0.219701	0.766423	0.718926	ltv1/nmd3/sdad1/rrs1	4
GO:0043266	GO:0043266	regulation of potassium ion transport	4/4227	10/17036	0.219701	0.766423	0.718926	wnk2/vip/neto2b/wnk1b	4
GO:0045620	GO:0045620	negative regulation of lymphocyte differentiation	4/4227	10/17036	0.219701	0.766423	0.718926	loxl3b/loxl3a/anxa1a/anxa1b	4
GO:0045663	GO:0045663	positive regulation of myoblast differentiation	4/4227	10/17036	0.219701	0.766423	0.718926	mapk14b/rbm24a/myf6/mapk14a	4
GO:0045747	GO:0045747	positive regulation of Notch signaling pathway	4/4227	10/17036	0.219701	0.766423	0.718926	angptl1a/tspan5a/angptl2b/epb41l5	4
GO:0046051	GO:0046051	UTP metabolic process	4/4227	10/17036	0.219701	0.766423	0.718926	nme2a/nme5/cad/nme8	4
GO:0048002	GO:0048002	antigen processing and presentation of peptide antigen	4/4227	10/17036	0.219701	0.766423	0.718926	b2m/erap1b/erap2/b2ml	4
GO:0050709	GO:0050709	negative regulation of protein secretion	4/4227	10/17036	0.219701	0.766423	0.718926	tnfrsf21/anxa1a/anxa1b/lgr4	4
GO:0050818	GO:0050818	regulation of coagulation	4/4227	10/17036	0.219701	0.766423	0.718926	pros1/anxa5b/plg/serping1	4
GO:0051149	GO:0051149	positive regulation of muscle cell differentiation	4/4227	10/17036	0.219701	0.766423	0.718926	mapk14b/rbm24a/myf6/mapk14a	4
GO:0051155	GO:0051155	positive regulation of striated muscle cell differentiation	4/4227	10/17036	0.219701	0.766423	0.718926	mapk14b/rbm24a/myf6/mapk14a	4
GO:0051489	GO:0051489	regulation of filopodium assembly	4/4227	10/17036	0.219701	0.766423	0.718926	gpm6ab/fmr1/dpysl3/nrp1a	4
GO:0055069	GO:0055069	zinc ion homeostasis	4/4227	10/17036	0.219701	0.766423	0.718926	slc30a4/slc39a7/slc39a6/slc39a13	4
GO:0070252	GO:0070252	actin-mediated cell contraction	4/4227	10/17036	0.219701	0.766423	0.718926	scn3b/scn1ba/scn1bb/prrx1a	4
GO:0071428	GO:0071428	rRNA-containing ribonucleoprotein complex export from nucleus	4/4227	10/17036	0.219701	0.766423	0.718926	ltv1/nmd3/sdad1/rrs1	4
GO:0090049	GO:0090049	regulation of cell migration involved in sprouting angiogenesis	4/4227	10/17036	0.219701	0.766423	0.718926	syk/nrp1a/anxa1a/anxa1b	4
GO:0097324	GO:0097324	melanocyte migration	4/4227	10/17036	0.219701	0.766423	0.718926	bace2/psenen/kcnj13/slc24a5	4
GO:0099175	GO:0099175	regulation of postsynapse organization	4/4227	10/17036	0.219701	0.766423	0.718926	dbnla/dbn1/caprin2/si:dkey-40c11.2	4
GO:0051017	GO:0051017	actin filament bundle assembly	19/4227	64/17036	0.220687	0.767165	0.719622	baiap2l1a/fmn2b/zgc:158689/spire1a/myoc/limk1b/dpysl3/pfn2/lima1a/limd2/fscn1a/baiap2a/fscn2a/baiap2l1b/add2/aif1l/sdc4/fhod1/rhoab	19
GO:0002221	GO:0002221	pattern recognition receptor signaling pathway	10/4227	31/17036	0.221363	0.767165	0.719622	tlr8b/sarm1/gpatch3/tlr5b/tlr5a/cd40/irak3/b2m/lgr4/ddx58	10
GO:0002758	GO:0002758	innate immune response-activating signal transduction	10/4227	31/17036	0.221363	0.767165	0.719622	tlr8b/sarm1/gpatch3/tlr5b/tlr5a/cd40/irak3/b2m/lgr4/ddx58	10
GO:0009190	GO:0009190	cyclic nucleotide biosynthetic process	10/4227	31/17036	0.221363	0.767165	0.719622	si:dkey-37g12.1/gucy2f/adcy3a/adcy2a/si:ch211-132f19.7/adcy2b/adcy1a/si:dkey-206f10.1/adcy7/adcy5	10
GO:0048919	GO:0048919	posterior lateral line neuromast development	10/4227	31/17036	0.221363	0.767165	0.719622	lef1/llgl2/rspo3/insm1a/shroom3/llgl1/wnk1b/tmem132e/ildr1b/neurod1	10
GO:0051588	GO:0051588	regulation of neurotransmitter transport	10/4227	31/17036	0.221363	0.767165	0.719622	rap1ab/cplx2/rims2a/trpm7/cplx3b/mctp2a/rims3/napbb/syt12/mctp2b	10
GO:0031334	GO:0031334	positive regulation of protein complex assembly	23/4227	79/17036	0.221853	0.768026	0.72043	rac3b/baiap2l1a/cdc42ep1a/cdc42ep4b/fmn2b/zgc:158689/spire1b/evla/vaspb/spire1a/arpc5b/zgc:114123/terf1/cyp11a1/cdc42ep1b/rac3a/zgc:86896/baiap2a/baiap2l1b/waslb/cdc42ep2/gsnb/zgc:101810	23
GO:0046488	GO:0046488	phosphatidylinositol metabolic process	32/4227	113/17036	0.222354	0.768272	0.72066	pi4k2a/slc27a1b/pigo/tpte/pik3c2b/si:ch211-25d12.7/ptenb/mtmr7a/pigv/ptena/pik3c2a/pip4k2ab/pgap2/mtmr1b/pigs/pip5k1ca/pik3cd/zgc:158659/impa2/mppe1/pign/pigm/cdipt/socs1a/socs2/pigw/inpp5e/inpp5jb/pi4kab/inpp5l/piga/plcd4b	32
GO:0032940	GO:0032940	secretion by cell	70/4227	259/17036	0.222407	0.768272	0.72066	arfip1/rfx3/mtnr1bb/sytl2a/hmgb1a/tlr8b/rap1ab/park7/tcf7l2/llgl2/si:dkey-196h17.9/rab11fip5a/vip/stx3a/cplx2/trmt12/sytl4/panx1a/hmgb1b/mtnr1ba/rims2a/rab25b/rab11al/ica1/stx11a/snap25b/trpm7/cplx3b/mctp2a/tmem79a/slc44a4/rims3/wls/ralab/slc6a9/rab11bb/sytl3/tnfaip2a/vps18/rab15/tnfrsf21/rfx6/napbb/tlr5b/tlr5a/mia3/rab27b/stxbp1a/stx2a/nkx6.1/zgc:162239/amh/hmgn3/syt12/syt9b/mical2b/scamp5a/rab3…	70
GO:0006310	GO:0006310	DNA recombination	43/4227	155/17036	0.223173	0.770081	0.722358	lig4/hmgb1a/meiob/ercc4/eme1/ap5s1/supv3l1/zfyve26/ercc2/hmgb1b/msh5/msh4/top2b/pif1/hfm1/si:ch73-382f3.1/mei4/mcm3/hmgb3b/terf2ip/xrcc2/rag2/si:dkey-108k21.10/si:dkey-108k21.21/zgc:153405/si:ch211-113a14.24/dclre1c/helb/histh1l/zswim7/h1m/mcm6/ino80db/si:dkey-23a13.9/si:dkey-23a13.17/si:ch73-368j24.11/si:ch73-368j24.12/si:ch1073-153i20.4/zgc:110425/hmgb3a/slx1b/zgc:163061/rmi1	43
GO:0072527	GO:0072527	pyrimidine-containing compound metabolic process	16/4227	53/17036	0.223639	0.77085	0.723079	tet2/dctd/tamm41/nme2a/nme5/cmpk2/aldh6a1/uck2b/cad/uck1/uckl1b/dhodh/uck2a/umps/cps1/nme8	16
GO:0006405	GO:0006405	RNA export from nucleus	13/4227	42/17036	0.224576	0.772405	0.724538	pcid2/ltv1/ddx19/thoc3/si:dkeyp-97b10.3/nmd3/eny2/thoc1/sdad1/ncbp2/rrs1/thoc5/gle1	13
GO:0060415	GO:0060415	muscle tissue morphogenesis	13/4227	42/17036	0.224576	0.772405	0.724538	blzf1/fbxo32/klf2b/dpf3/nrg2a/wwtr1/mybpc1/igfn1.3/igfn1.1/mybpc3/obsl1b/ttn.1/ttn.2	13
GO:1901605	GO:1901605	alpha-amino acid metabolic process	44/4227	159/17036	0.225566	0.773005	0.7251	pycr1b/zgc:92040/p4ha1a/aldh18a1/oat/qdpra/sdsl/p4ha1b/hmgcl/tdh2/aldh6a1/noxred1/got2a/gmps/asns/crtap/glula/cnr1/cad/pycr3/glulc/p4ha2/gls2b/si:ch211-256m1.8/gcat/shmt1/bcat1/prodhb/nos1/dao.2/nos2a/gldc/p4htm/shmt2/fah/got2b/gls2a/ahcyl1/amt/got1l1/plod1a/ido1/cps1/phgdh	44
GO:0001885	GO:0001885	endothelial cell development	8/4227	24/17036	0.226943	0.773005	0.7251	meis1b/npas4l/tnmd/lama4/tnfrsf21/fbn2b/slc2a1a/f11r.1	8
GO:0006270	GO:0006270	DNA replication initiation	8/4227	24/17036	0.226943	0.773005	0.7251	wdr18/gmnc/orc3/mcm3/mcm10/mcm6/orc6/cdt1	8
GO:0006826	GO:0006826	iron ion transport	8/4227	24/17036	0.226943	0.773005	0.7251	hephl1a/si:ch211-254p10.2/scara5/cp/zgc:56095/steap2/fth1b/steap3	8
GO:0030149	GO:0030149	sphingolipid catabolic process	8/4227	24/17036	0.226943	0.773005	0.7251	smpd1/gm2a/galcb/galca/smpd4/neu3.2/pdxdc1/gba2	8
GO:0035924	GO:0035924	cellular response to vascular endothelial growth factor stimulus	8/4227	24/17036	0.226943	0.773005	0.7251	gdf6a/kdr/cad/ccbe1/nrp1a/vegfab/anxa1a/anxa1b	8
GO:0046466	GO:0046466	membrane lipid catabolic process	8/4227	24/17036	0.226943	0.773005	0.7251	smpd1/gm2a/galcb/galca/smpd4/neu3.2/pdxdc1/gba2	8
GO:0072089	GO:0072089	stem cell proliferation	8/4227	24/17036	0.226943	0.773005	0.7251	ism1/trim71/ago3b/csf3b/tfec/znrf3/mettl3/cyp2r1	8
GO:0048285	GO:0048285	organelle fission	51/4227	186/17036	0.227033	0.773005	0.7251	mxa/mxb/ncapd3/map9/bora/ewsr1a/pmaip1/meiob/ercc4/eme1/ndel1a/pdcd2/mad2l1bp/fbxo5/si:ch1073-266p11.2/aurkb/msh5/usp16/dscc1/hormad1/wnt4b/gnl2/fbxo43/msh4/kif23/mcl1a/top2b/pex11b/cdca8/cdc14aa/ppp1r7/hfm1/mei4/anapc4/hnrnpub/sass6/birc5b/smc1a/mxg/syce2/mief1/ndel1b/ccnb1/aurka/terb2/cdt1/m1ap/cdc14b/rmi1/mxc/mxe	51
GO:0055086	GO:0055086	nucleobase-containing small molecule metabolic process	113/4227	427/17036	0.227381	0.773005	0.7251	gart/atic/mdh1b/gne/dctd/si:dkey-37g12.1/ugp2a/pgam1b/tamm41/pnp4a/park7/pfklb/nme2a/adkb/pank2/elovl6l/adka/nt5c1ba/cox5b2/nme5/pnkp/gucy2f/adcy3a/adcy2a/gapdh/gapdhs/gnpnat1/eno4/acss1/si:ch211-132f19.7/xdh/cmpk2/nt5c1ab/aldh6a1/mthfd1b/gpib/pkma/nnt2/uraha/si:dkey-145c18.3/si:dkey-145c18.2/gmps/adcy2b/rrm2/uck2b/acot11a/prtfdc1/elovl1a/pfkpb/pnp5b/nt5e/adcy1a/enpp1/paics/ppat/mthfd1l/cad/si:dk…	113
GO:0014033	GO:0014033	neural crest cell differentiation	39/4227	140/17036	0.227641	0.773005	0.7251	radil/lef1/esf1/dla/rtf1/lbh/polr1a/fmr1/anxa6/meis3/masp1/sema6e/phactr4b/wtip/pak1/sema3d/sema4ab/chd7/sema4e/nrg2a/si:ch211-129c21.1/nrp1a/sema5a/kctd15a/sox10/atp6v0a1a/smarca4a/fscn1a/olfm2a/cax1/sema3c/tbx1/sema5bb/foxd3/tfap2c/fgf3/zic2a/med14/dhrs9	39
GO:0000959	GO:0000959	mitochondrial RNA metabolic process	6/4227	17/17036	0.228879	0.773005	0.7251	trmt10c/supv3l1/trmt61b/elac2/mrpl12/wars2	6
GO:0002098	GO:0002098	tRNA wobble uridine modification	6/4227	17/17036	0.228879	0.773005	0.7251	alkbh8/elp2/dph3/elp4/ctu2/ctu1	6
GO:0010811	GO:0010811	positive regulation of cell-substrate adhesion	6/4227	17/17036	0.228879	0.773005	0.7251	emilin2a/emilin1a/ecm2/si:dkey-32e6.6/emilin2b/si:dkey-6n6.1	6
GO:0048814	GO:0048814	regulation of dendrite morphogenesis	6/4227	17/17036	0.228879	0.773005	0.7251	dbnla/fmr1/dbn1/caprin2/si:dkey-40c11.2/zmp:0000001168	6
GO:1901796	GO:1901796	regulation of signal transduction by p53 class mediator	6/4227	17/17036	0.228879	0.773005	0.7251	spred2a/prpf19/smyd2a/spred3/vax2/scrt2	6
GO:0048878	GO:0048878	chemical homeostasis	115/4227	435/17036	0.228885	0.773005	0.7251	atp1a1a.5/slc24a2/wfs1a/fam155a/si:dkey-28b4.8/tcirg1a/pkd2/glis3/dgat2/ryr1a/slc4a5/slc8a1a/wnk2/park7/ca15b/tcf7l2/slc9a3r1a/letm1/cnnm2a/acoxl/slc34a1a/lpar4/abcb7/tcirg1b/klhl3/pde6a/anxa6/hephl1a/atp1b3b/gpr4/stim1a/gpr55a/lamtor1/bves/rhbg/atp2c1/foxo3a/ptger2a/trpm7/slc12a1/slc30a4/si:ch211-260p9.3/itpr2/herpud1/bcl2l10/trpc6b/slc9a3.1/slc39a7/atp1b3a/slc12a7a/agtr1a/ackr4a/opn4.1/slc39a6/…	115
GO:0050767	GO:0050767	regulation of neurogenesis	76/4227	283/17036	0.230208	0.776246	0.72814	lef1/pnx/musk/dpysl2b/dbnla/id1/srgap2/cdkl5/neurod2/fmr1/rest/sirt2/nf1a/sema6e/gnl2/ctbp2a/mdga2a/id2a/alk/pak1/sema3d/rgma/ncaldb/sema4ab/pard6gb/hey1/col15a1b/tnr/hes6/sema4e/id2b/stmn4/arf6a/notch1a/nsmfa/nkx6.1/arl3l1/dbn1/serpinf1/dpysl3/tcf3b/si:ch211-129c21.1/pacsin1a/ngfa/pik3cd/nrp1a/sema5a/neurod6a/lrrc4bb/sox10/lgals2a/elavl3/plxnb2a/caprin2/plxnc1/sema3c/gata3/si:dkey-40c11.2/ntrk2b…	76
GO:0045454	GO:0045454	cell redox homeostasis	17/4227	57/17036	0.230848	0.776246	0.72814	pdia2/nxnl2/prdx1/txndc12/glrx5/prdx6/pdia6/glrx/prdx5/dnajc16/txndc5/pdia4/pdia3/prdx4/p4hb/pdia5/nme8	17
GO:0055013	GO:0055013	cardiac muscle cell development	17/4227	57/17036	0.230848	0.776246	0.72814	mat2aa/mef2ca/cyp26c1/asb2b/myh6/sept15/mybpc1/rbfox2/tomm70a/igfn1.3/igfn1.1/mybpc3/nexn/neb/obsl1b/ttn.1/ttn.2	17
GO:0060216	GO:0060216	definitive hemopoiesis	17/4227	57/17036	0.230848	0.776246	0.72814	meis1b/npas4l/smyd5/csf3r/iqcg/mycb/angptl1a/scml4/dkc1/smarcd1/mbd3b/myb/dnmt1/tfec/sumo1/angptl2b/hoxd4a	17
GO:0010941	GO:0010941	regulation of cell death	118/4227	447/17036	0.231066	0.776246	0.72814	melk/ing2/si:dkey-9i23.15/tiprl/apc/ptpn11a/si:ch211-57m13.9/pmaip1/sppl3/npm1a/hyou1/trim69/si:dkey-85p17.3/si:ch211-122l14.7/park7/si:ch1073-526c11.3/pimr46/heatr1/socs3b/pimr47/supv3l1/si:ch211-202m22.1/vip/aurkb/nme5/maea/gdf9/pimr212/sirt2/bbc3/sarm1/psenen/pimr209/pimr108/gdf3/foxo3a/lgals3b/pimr175/pimr168/pacrg/pimr60/pimr62/herpud1/bcl2l13/si:ch211-160d20.5/bcl2l10/pimr179/mcl1a/tnfaip8l…	118
GO:0018193	GO:0018193	peptidyl-amino acid modification	121/4227	459/17036	0.233161	0.78068	0.732299	zgc:77880/prmt9/pkn1a/setd4/spred2a/golga7ba/naa25/golga7/prkacba/mapkapk3/setmar/bsk146/p4ha1a/zdhhc4/ep300a/loxl3b/zmiz1a/prkcha/aurkb/loxl3a/syvn1/zdhhc24/naa15a/meis3/hmbsb/si:ch211-167j9.5/dph1/prkcg/gapdh/ptk2ab/sh3bp5b/si:ch73-340m8.2/ptk2ba/cdc42bpaa/p4ha1b/smyd2a/qpct/ttbk2a/zdhhc7/spred3/ehmt2/cfap20/setdb1a/zdhhc18b/jarid2b/sh3bp5lb/atat1/crtap/yrk/tada1/tnk2b/pkn2/mknk2a/yes1/ing5b/ug…	121
GO:0001837	GO:0001837	epithelial to mesenchymal transition	11/4227	35/17036	0.233539	0.78068	0.732299	snai1a/llgl2/fmr1/bmper/chd7/prrx1a/slc39a6/ek1/kctd15a/parp3/tfap2c	11
GO:0030968	GO:0030968	endoplasmic reticulum unfolded protein response	11/4227	35/17036	0.233539	0.78068	0.732299	clgn/canx/serp1/herpud1/calr3b/atf6/rnf121/calr3a/hspa5/xbp1/derl2	11
GO:0070972	GO:0070972	protein localization to endoplasmic reticulum	11/4227	35/17036	0.233539	0.78068	0.732299	spcs3/kdelr2b/sec61b/srp14/sec62/tram2/efhc1/tram1/top1mt/sec61a1/sec61a1l	11
GO:1902667	GO:1902667	regulation of axon guidance	14/4227	46/17036	0.233614	0.78068	0.732299	sema6e/sema3d/ncaldb/sema4ab/col15a1b/sema4e/arl3l1/si:ch211-129c21.1/nrp1a/sema5a/sema3c/sema5bb/vax2/rbpms2b	14
GO:1902532	GO:1902532	negative regulation of intracellular signal transduction	31/4227	110/17036	0.236031	0.787927	0.739098	rasa3/spred2a/hyou1/ddit4/nme5/dusp1/prpf19/tnfaip1/sik2b/nf1a/pde11al/gpatch3/herpud1/spred3/mcl1a/sesn2/rnf152/akap12b/si:ch211-22d5.2/tnfaip8l1/bmt2/socs1a/pde3a/irak3/socs2/rasa1a/rasa4/vax2/si:cabz01029535.1/ajuba/cerkl	31
GO:0048701	GO:0048701	embryonic cranial skeleton morphogenesis	44/4227	160/17036	0.239917	0.797701	0.748266	ptpn11a/auts2a/rap1ab/ece1/chd5/ep300a/nolc1/meis1b/loxl3b/polr1c/runx3/lbh/polr1a/pitx2/macc1/itga8/wdr43/meis2a/pak1/rit1/dlx5a/tinagl1/rbm24a/wls/chd7/pkn2/mmachc/ahsa1a/prdm5/ptpn11b/itga5/smarca4a/xylt1/fscn1a/cacna1c/gata3/tbx1/fgf3/tp73/dlx1a/zic2a/kdm6a/med14/dhrs9	44
GO:0006644	GO:0006644	phospholipid metabolic process	59/4227	218/17036	0.241189	0.797701	0.748266	pi4k2a/slc27a1b/plppr1/pigo/plpp5/tpte/smpd1/zgc:77375/tamm41/si:ch73-267c23.10/pik3c2b/si:ch211-25d12.7/ptenb/pgp/agpat5/mtmr7a/enpp2/fdps/mboat7/pigv/ptdss1a/crls1/ptena/pik3c2a/lpcat1/ptdss1b/pip4k2ab/pld1a/oc90/smpd4/pgap2/mtmr1b/pigs/pip5k1ca/plpp2b/pik3cd/zgc:158659/impa2/mppe1/pign/pigm/cdipt/gdpd3a/socs1a/zgc:92162/socs2/pigw/mvk/pik3ip1/serinc5/inpp5e/inpp5jb/lpcat2/pi4kab/cept1a/inpp5l/…	59
GO:0001894	GO:0001894	tissue homeostasis	15/4227	50/17036	0.241712	0.797701	0.748266	mcoln1a/lef1/nxnl2/pde6c/tcf7l2/gdf6a/mcl1a/ift57/ift172/napbb/mcoln1b/cdipt/acp5a/rp2/piezo1	15
GO:0002028	GO:0002028	regulation of sodium ion transport	9/4227	28/17036	0.242222	0.797701	0.748266	wnk2/scn3b/scn1ba/fxyd1/neto2b/scn1bb/cldnb/nkain4/wnk1b	9
GO:0002366	GO:0002366	leukocyte activation involved in immune response	9/4227	28/17036	0.242222	0.797701	0.748266	ptenb/loxl3b/cd74a/loxl3a/ptena/eomesa/anxa1a/anxa1b/fes	9
GO:0030241	GO:0030241	skeletal muscle myosin thick filament assembly	9/4227	28/17036	0.242222	0.797701	0.748266	mef2ca/mybpc1/smyd1a/igfn1.3/igfn1.1/mybpc3/obsl1b/ttn.1/ttn.2	9
GO:0032958	GO:0032958	inositol phosphate biosynthetic process	9/4227	28/17036	0.242222	0.797701	0.748266	ipmkb/plcd3b/si:ch211-260p9.3/plcd1b/itpkb/itpkca/ippk/plcd1a/plcd4b	9
GO:0042558	GO:0042558	pteridine-containing compound metabolic process	9/4227	28/17036	0.242222	0.797701	0.748266	qdpra/mthfd1b/zgc:153031/mthfd1l/zgc:171566/shmt1/spra/shmt2/mthfs	9
GO:0046579	GO:0046579	positive regulation of Ras protein signal transduction	9/4227	28/17036	0.242222	0.797701	0.748266	lpar4/gpr4/gpr55a/f2rl1.2/f2rl1.1/zgc:171965/zgc:172079/gpr18/p2ry8	9
GO:0050906	GO:0050906	detection of stimulus involved in sensory perception	9/4227	28/17036	0.242222	0.797701	0.748266	lhfpl5a/ppef1/myo7aa/trpn1/trpa1a/trpa1b/tmc1/tmem132e/gnat2	9
GO:0051057	GO:0051057	positive regulation of small GTPase mediated signal transduction	9/4227	28/17036	0.242222	0.797701	0.748266	lpar4/gpr4/gpr55a/f2rl1.2/f2rl1.1/zgc:171965/zgc:172079/gpr18/p2ry8	9
GO:0055078	GO:0055078	sodium ion homeostasis	9/4227	28/17036	0.242222	0.797701	0.748266	atp1a1a.5/slc9a3r1a/atp1b3b/slc12a1/atp1b3a/atp1b2a/atp1b1a/slc12a10.2/slc12a10.3	9
GO:1901570	GO:1901570	fatty acid derivative biosynthetic process	9/4227	28/17036	0.242222	0.797701	0.748266	elovl6l/hmgcl/elovl1a/ptgs2a/elovl4b/anxa1a/anxa1b/elovl7a/elovl7b	9
GO:0048747	GO:0048747	muscle fiber development	28/4227	99/17036	0.243443	0.798757	0.749257	mbnl2/dmd/gne/lef1/myo18aa/fkrp/pomgnt2/gdf6a/gmppb/cavin4b/ccdc78/ambra1b/lgals2a/carm1/scube1/mybpc1/myf6/myhz2/rbfox2/igfn1.3/igfn1.1/mybpc3/nexn/neb/obsl1b/ttn.1/ttn.2/klhl41a	28
GO:1902850	GO:1902850	microtubule cytoskeleton organization involved in mitosis	19/4227	65/17036	0.243505	0.798757	0.749257	map9/bora/ewsr1a/ndel1a/si:ch1073-266p11.2/aurkb/diaph2/wtip/kif23/cep126/hnrnpub/efhc1/sass6/birc5b/ndel1b/ccdc151/aurka/vangl2/rhoab	19
GO:0002697	GO:0002697	regulation of immune effector process	12/4227	39/17036	0.244095	0.798757	0.749257	trpm4b.1/loxl3b/loxl3a/tnfrsf1a/gpatch3/cav1/trpm4a/anxa1a/anxa1b/fes/serping1/zgc:153759	12
GO:0071407	GO:0071407	cellular response to organic cyclic compound	12/4227	39/17036	0.244095	0.798757	0.749257	tacr1b/rap1ab/esr2b/cyp1a/ptgs2a/abhd2b/carm1/shmt1/anxa1a/anxa1b/shmt2/cyp2r1	12
GO:0016311	GO:0016311	dephosphorylation	64/4227	238/17036	0.24864	0.798757	0.749257	zdhhc8a/ptpn11a/plppr1/plpp5/tpte/dlg2/ppm1e/zcchc9/si:ch211-15p9.2/ptpdc1a/ptenb/pgp/ppm1g/cdkn3/dusp1/mtmr7a/ppp2r2ba/pnkp/ppm1da/ssh2a/pdp1/ptena/ptprq/pdp2/dusp22a/arpp19a/ptprua/ptp4a2b/dusp22b/si:ch1073-184j22.2/ppm1la/cdc14aa/rpap2/ptprfb/dusp12/si:ch211-121a2.2/ppp2r5a/ppp2r5ea/ppp1r26/mtmr1b/ublcp1/ppp2r2bb/plpp2b/ptprc/ppp4r2a/ptpn11b/si:ch211-149b19.3/impa2/ptpro/ptprz1b/mtmr4/inpp5e/i…	64
GO:0034504	GO:0034504	protein localization to nucleus	16/4227	54/17036	0.249017	0.798757	0.749257	kpnb3/kpna7/ipo9/kpna4/nutf2/kpnb1/kpna1/snupn/tnpo2/kpna2/tnpo3/rpain/dzip1/heatr3/nup35/pttg1ipb	16
GO:0061013	GO:0061013	regulation of mRNA catabolic process	16/4227	54/17036	0.249017	0.798757	0.749257	csdc2a/vip/dnd1/fmr1/hnrnpa0a/mettl16/zfp36l1a/syncripl/pabpc1b/rbm24a/zfp36l1b/hnrnpub/ncl/carhsp1/cth1/mettl3	16
GO:0051253	GO:0051253	negative regulation of RNA metabolic process	119/4227	453/17036	0.249075	0.798757	0.749257	eed/lef1/junba/pnx/smad2/per1a/smad9/nr2f1b/nr1d4b/rargb/id1/maf1/sox13/foxh1/hexim1/six3b/osr1/vip/aurkb/dnd1/dpf2l/hnrnpa0a/rest/sirt2/rrp8/zbtb16b/erfl3/atxn1b/osr2/foxo3a/si:ch211-160f23.5/gcfc2/smyd2a/prox1a/id2a/mta1/syncripl/ccpg1/tshz3a/tcf25/eomesa/setdb1a/zfpm2b/nr1d2b/jarid2b/hey1/rbm24a/bmi1b/mycb/chd8/homeza/hes6/mbd3a/si:dkeyp-68b7.7/vrtn/dpf3/si:ch211-195d17.2/id2b/hnrnpub/insm1a/s…	119
GO:0009913	GO:0009913	epidermal cell differentiation	20/4227	69/17036	0.249097	0.798757	0.749257	mcoln1a/foxj1b/emx2/pax2a/dcdc2b/jag1b/kdf1a/prox1a/myo7aa/slc44a4/insm1a/mgat5/pth1a/mcoln1b/crb3a/anxa1a/tmem132e/anxa1b/fgf3/neurod1	20
GO:0006360	GO:0006360	transcription by RNA polymerase I	7/4227	21/17036	0.249646	0.798757	0.749257	heatr1/cd3eap/utp15/znrd1/taf1b/taf1a/nol11	7
GO:0015908	GO:0015908	fatty acid transport	7/4227	21/17036	0.249646	0.798757	0.749257	slc27a1b/slc27a4/mfsd2aa/oc90/zgc:92162/anxa1a/anxa1b	7
GO:0021587	GO:0021587	cerebellum morphogenesis	7/4227	21/17036	0.249646	0.798757	0.749257	pax2a/exosc3/rbm7/wdr73/wnt1/roraa/ptpro	7
GO:0030199	GO:0030199	collagen fibril organization	7/4227	21/17036	0.249646	0.798757	0.749257	loxl3b/loxl3a/col11a2/col5a1/col5a3a/si:dkey-14d8.6/plod1a	7
GO:0032474	GO:0032474	otolith morphogenesis	7/4227	21/17036	0.249646	0.798757	0.749257	dcdc2b/jag1b/sparc/gas8/slc44a4/lrrc23/ttc25	7
GO:0040001	GO:0040001	establishment of mitotic spindle localization	7/4227	21/17036	0.249646	0.798757	0.749257	ndel1a/diaph2/wtip/ndel1b/ccdc151/vangl2/rhoab	7
GO:0048264	GO:0048264	determination of ventral identity	7/4227	21/17036	0.249646	0.798757	0.749257	ift46/robo3/ppp4cb/gdf6a/ankrd6b/max/ppp4ca	7
GO:0048934	GO:0048934	peripheral nervous system neuron differentiation	7/4227	21/17036	0.249646	0.798757	0.749257	sema3d/ssbp3a/chd7/notch1a/dpysl3/rtn4r/notch1b	7
GO:0048935	GO:0048935	peripheral nervous system neuron development	7/4227	21/17036	0.249646	0.798757	0.749257	sema3d/ssbp3a/chd7/notch1a/dpysl3/rtn4r/notch1b	7
GO:0043254	GO:0043254	regulation of protein complex assembly	42/4227	153/17036	0.250277	0.798757	0.749257	tmod1/si:ch211-176g13.8/dbnla/rac3b/baiap2l1a/cdc42ep1a/cdc42ep4b/fmn2b/sar1ab/eml2/zgc:158689/tmod4/spire1b/si:ch211-175f11.5/evla/sptb/vaspb/spire1a/vps18/arpc5b/napbb/dbn1/pfn2/zgc:114123/terf1/twf1a/cyp11a1/cdc42ep1b/rac3a/zgc:86896/baiap2a/kank2/baiap2l1b/waslb/add2/kank1b/cdc42ep2/si:dkey-40c11.2/kank1a/gsnb/zgc:101810/kank3	42
GO:0001941	GO:0001941	postsynaptic membrane organization	5/4227	14/17036	0.252905	0.798757	0.749257	musk/nlgn2b/nlgn3a/nlgn3b/nlgn2a	5
GO:0002574	GO:0002574	thrombocyte differentiation	5/4227	14/17036	0.252905	0.798757	0.749257	rasa3/brf1b/brd3a/brd4/wdr66	5
GO:0007257	GO:0007257	activation of JUN kinase activity	5/4227	14/17036	0.252905	0.798757	0.749257	ripk1l/ripk2/mapk8ip3/axin1/map3k12	5
GO:0007611	GO:0007611	learning or memory	5/4227	14/17036	0.252905	0.798757	0.749257	vip/nf1a/pcxa/ngfa/pappaa	5
GO:0014020	GO:0014020	primary neural tube formation	5/4227	14/17036	0.252905	0.798757	0.749257	tdgf1/dvl1b/phactr4b/vaspb/shroom3	5
GO:0018149	GO:0018149	peptide cross-linking	5/4227	14/17036	0.252905	0.798757	0.749257	tgm1l1/tgm1l2/tgm1l3/tgm2a/tgm5l	5
GO:0019377	GO:0019377	glycolipid catabolic process	5/4227	14/17036	0.252905	0.798757	0.749257	gm2a/galcb/galca/neu3.2/gba2	5
GO:0022409	GO:0022409	positive regulation of cell-cell adhesion	5/4227	14/17036	0.252905	0.798757	0.749257	hhla2b.2/hhla2b.1/gata3/anxa1a/anxa1b	5
GO:0030007	GO:0030007	cellular potassium ion homeostasis	5/4227	14/17036	0.252905	0.798757	0.749257	atp1a1a.5/atp1b3b/atp1b3a/atp1b2a/atp1b1a	5
GO:0031167	GO:0031167	rRNA methylation	5/4227	14/17036	0.252905	0.798757	0.749257	nsun5/mettl16/fbl/nsun4/ftsj3	5
GO:0032959	GO:0032959	inositol trisphosphate biosynthetic process	5/4227	14/17036	0.252905	0.798757	0.749257	plcd3b/si:ch211-260p9.3/plcd1b/plcd1a/plcd4b	5
GO:0034198	GO:0034198	cellular response to amino acid starvation	5/4227	14/17036	0.252905	0.798757	0.749257	sesn2/rnf152/dap/bmt2/dap1b	5
GO:0035710	GO:0035710	CD4-positive, alpha-beta T cell activation	5/4227	14/17036	0.252905	0.798757	0.749257	loxl3b/loxl3a/sh3rf1/anxa1a/anxa1b	5
GO:0036376	GO:0036376	sodium ion export across plasma membrane	5/4227	14/17036	0.252905	0.798757	0.749257	atp1a1a.5/atp1b3b/atp1b3a/atp1b2a/atp1b1a	5
GO:0042542	GO:0042542	response to hydrogen peroxide	5/4227	14/17036	0.252905	0.798757	0.749257	per1a/park7/cat/anxa1a/anxa1b	5
GO:0043467	GO:0043467	regulation of generation of precursor metabolites and energy	5/4227	14/17036	0.252905	0.798757	0.749257	khk/pask/ppp1r3b/scn1lab/shmt2	5
GO:0043507	GO:0043507	positive regulation of JUN kinase activity	5/4227	14/17036	0.252905	0.798757	0.749257	ripk1l/ripk2/mapk8ip3/axin1/map3k12	5
GO:0046479	GO:0046479	glycosphingolipid catabolic process	5/4227	14/17036	0.252905	0.798757	0.749257	gm2a/galcb/galca/neu3.2/gba2	5
GO:1900006	GO:1900006	positive regulation of dendrite development	5/4227	14/17036	0.252905	0.798757	0.749257	dbnla/dbn1/pacsin1a/caprin2/si:dkey-40c11.2	5
GO:1990928	GO:1990928	response to amino acid starvation	5/4227	14/17036	0.252905	0.798757	0.749257	sesn2/rnf152/dap/bmt2/dap1b	5
GO:0007127	GO:0007127	meiosis I	13/4227	43/17036	0.25335	0.798757	0.749257	meiob/ercc4/eme1/msh5/hormad1/msh4/top2b/hfm1/mei4/syce2/terb2/m1ap/rmi1	13
GO:0050863	GO:0050863	regulation of T cell activation	13/4227	43/17036	0.25335	0.798757	0.749257	loxl3b/loxl3a/ndrg1b/sh3rf1/tnfrsf21/hhla2b.2/hhla2b.1/gata3/anxa1a/anxa1b/mettl3/zgc:153759/foxp3a	13
GO:0051222	GO:0051222	positive regulation of protein transport	13/4227	43/17036	0.25335	0.798757	0.749257	hmgb1a/tcf7l2/sar1ab/si:ch211-210b2.2/panx1a/hmgb1b/si:dkey-206p8.1/anxa13l/rfx6/scamp5a/mief1/ano1/zgc:153759	13
GO:1904951	GO:1904951	positive regulation of establishment of protein localization	13/4227	43/17036	0.25335	0.798757	0.749257	hmgb1a/tcf7l2/sar1ab/si:ch211-210b2.2/panx1a/hmgb1b/si:dkey-206p8.1/anxa13l/rfx6/scamp5a/mief1/ano1/zgc:153759	13
GO:0007159	GO:0007159	leukocyte cell-cell adhesion	10/4227	32/17036	0.254981	0.802306	0.752585	loxl3b/loxl3a/tnfrsf21/podxl2/hhla2b.2/hhla2b.1/gata3/anxa1a/anxa1b/zgc:153759	10
GO:1902476	GO:1902476	chloride transmembrane transport	10/4227	32/17036	0.254981	0.802306	0.752585	slc12a1/slc12a7a/gabrg2/best1/ano6/slc12a10.2/slc12a10.3/ano1/slc12a8/glra2	10
GO:0032835	GO:0032835	glomerulus development	17/4227	58/17036	0.255646	0.803603	0.753802	tdgf1/plce1/pax2a/osr1/tmem234/kirrel3l/myo1eb/thsd7aa/shroom3/nphs2/sulf1/kank2/myo1ca/vcana/myh9a/usp40/p4htm	17
GO:0051960	GO:0051960	regulation of nervous system development	82/4227	309/17036	0.258395	0.810414	0.760191	lef1/pnx/musk/dpysl2b/dbnla/id1/srgap2/dvl1b/cdkl5/neurod2/fmr1/rest/bace1/sirt2/nf1a/si:ch211-276c2.2/sema6e/gnl2/foxo3a/ctbp2a/mdga2a/id2a/alk/pak1/sema3d/rgma/ncaldb/sema4ab/pard6gb/hey1/col15a1b/tnr/hes6/sema4e/id2b/stmn4/tnfrsf21/arf6a/notch1a/nsmfa/nkx6.1/arl3l1/dbn1/serpinf1/dpysl3/tcf3b/si:ch211-129c21.1/pacsin1a/ngfa/pik3cd/nrp1a/sema5a/neurod6a/lrrc4bb/sox10/lgals2a/elavl3/plxnb2a/capri…	82
GO:0001558	GO:0001558	regulation of cell growth	27/4227	96/17036	0.258926	0.810414	0.760191	ewsr1a/musk/dpysl2b/dbnla/cdkl5/supv3l1/sema6e/sema3d/wfdc1/slc44a4/ncaldb/sema4ab/pard6gb/sema4e/nkx6.1/arl3l1/dbn1/si:ch211-129c21.1/pik3cd/sema5a/socs2/sema3c/si:dkey-40c11.2/sema5bb/ntn1a/si:cabz01029535.1/mapk14a	27
GO:0001816	GO:0001816	cytokine production	22/4227	77/17036	0.259088	0.810414	0.760191	hmgb1a/tlr8b/trpm4b.1/panx1a/zbtb16b/hmgb1b/gpatch3/tnfrsf21/tlr5b/tlr5a/pias4a/sulf1/scamp5a/nfatc3b/trpm4a/irak3/anxa1a/anxa1b/aep1/lgr4/zgc:153759/ddx58	22
GO:0030178	GO:0030178	negative regulation of Wnt signaling pathway	22/4227	77/17036	0.259088	0.810414	0.760191	apc/jupa/cby1/rspo3/grb10a/mylipa/nkd3/chd8/ankrd6b/ctnnbip1/amer2/szl/axin1/axin2/wif1/znrf3/dab2/rgs3a/vangl2/tle3b/fzd5/frzb	22
GO:0050768	GO:0050768	negative regulation of neurogenesis	22/4227	77/17036	0.259088	0.810414	0.760191	musk/id1/srgap2/rest/sirt2/sema6e/id2a/sema3d/rgma/sema4ab/sema4e/id2b/notch1a/si:ch211-129c21.1/sema5a/sox10/sema3c/her7/sema5bb/si:cabz01029535.1/her8a/dlx1a	22
GO:0046903	GO:0046903	secretion	74/4227	278/17036	0.261134	0.81521	0.764689	arfip1/rfx3/mtnr1bb/sytl2a/hmgb1a/tlr8b/rap1ab/park7/tcf7l2/llgl2/si:dkey-196h17.9/rab11fip5a/vip/stx3a/cplx2/trmt12/sytl4/panx1a/hmgb1b/mtnr1ba/rims2a/rab25b/rab11al/ica1/stx11a/snap25b/trpm7/cplx3b/mctp2a/tmem79a/slc44a4/rims3/wls/ralab/slc6a9/oc90/rab11bb/sytl3/tnfaip2a/vps18/rab15/tnfrsf21/rfx6/napbb/tlr5b/tlr5a/mia3/rab27b/stxbp1a/stx2a/nkx6.1/zgc:162239/amh/hmgn3/syt12/si:ch73-151m17.5/syt9…	74
GO:1901361	GO:1901361	organic cyclic compound catabolic process	74/4227	278/17036	0.261134	0.81521	0.764689	pcid2/exosc9/tet2/dis3/patl1/pgam1b/parn/smg8/dcps/comtb/pde12/pfklb/zgc:92040/heatr1/csdc2a/supv3l1/tbp/vip/dnd1/fmr1/hnrnpa0a/qdpra/exosc3/mettl16/gapdh/gapdhs/eno4/xdh/zfp36l1a/aldh6a1/syncripl/gpib/pkma/uraha/exosc7/ago3b/pabpc1b/lin28a/rbm24a/exosc4/pfkpb/nt5e/cyp46a1.2/zfp36l1b/enpp1/hnrnpub/rexo4/pgam2/ncl/ncbp2/exosc10/zgc:103759/pfkma/eno3/pfkpa/fen1/pkmb/cnp/hmox1a/carhsp1/snd1/prodhb/d…	74
GO:0001101	GO:0001101	response to acid chemical	18/4227	62/17036	0.261694	0.815355	0.764826	slc38a9/rargb/scdb/lamtor1/nr2f5/ptger2a/sesn2/rxraa/rarab/shmt1/lamtor4/brinp3a.1/brinp3a.2/shmt2/ache/cpeb1b/nfe2l2a/glra2	18
GO:0006633	GO:0006633	fatty acid biosynthetic process	18/4227	62/17036	0.261694	0.815355	0.764826	tecrb/elovl6l/scdb/acot11a/tecrl2b/elovl1a/ptgs2a/elovl4b/fads2/abhd2b/hsd17b12a/anxa1a/anxa1b/hsd17b12b/elovl7a/elovl8b/lipg/elovl7b	18
GO:0010638	GO:0010638	positive regulation of organelle organization	41/4227	150/17036	0.263515	0.820225	0.769394	pmaip1/rac3b/baiap2l1a/cdc42ep1a/cdc42ep4b/fmn2b/meis3/bbc3/zgc:158689/spire1b/evla/vaspb/setdb1a/jarid2b/spire1a/rbm24a/ppp1r7/anapc4/arpc5b/hnrnpub/hmbox1b/limk1b/pfn2/zgc:114123/terf1/cyp11a1/cdc42ep1b/mief1/rac3a/zgc:86896/baiap2a/baiap2l1b/waslb/tnksb/anxa1a/cdc42ep2/gsnb/anxa1b/zgc:101810/phf19/lnpa	41
GO:0009611	GO:0009611	response to wounding	67/4227	251/17036	0.264751	0.820585	0.769732	prozb/pros1/lef1/sigmar1/dpysl2b/hmgb1a/hoxc13b/prph/si:ch1073-278o19.1/becn1/bambia/six3b/galnt2/jag1b/hbegfa/anxa6/sarm1/tnfrsf1a/ptena/ctsba/sema3d/rgma/b3gat1a/krt17/f3b/sox11b/plg/insm1a/f2rl1.2/f2rl1.1/zgc:171965/pou5f3/cldnc/prdx5/dpysl3/mgat5/acvr1ba/hoxc13a/vim/lingo1a/cav1/duox/cnp/smarca4a/lgals2a/prkcbb/axin1/foxj1a/ano6/atp6v1e1b/gata3/anxa1a/nos2a/anxa1b/notch1b/plxna1b/evpla/mustn1…	67
GO:0030901	GO:0030901	midbrain development	11/4227	36/17036	0.265829	0.820585	0.769732	dla/apc/pax2a/fgfr2/en2b/chd8/wdr73/csrnp1b/kdm7ab/fgf3/zic2a	11
GO:0039019	GO:0039019	pronephric nephron development	11/4227	36/17036	0.265829	0.820585	0.769732	tdgf1/pax2a/osr1/tmem234/kirrel3l/nphs2/irx3b/vcana/usp40/sec61a1/p4htm	11
GO:0002224	GO:0002224	toll-like receptor signaling pathway	8/4227	25/17036	0.265954	0.820585	0.769732	tlr8b/sarm1/tlr5b/tlr5a/cd40/irak3/b2m/lgr4	8
GO:0006406	GO:0006406	mRNA export from nucleus	8/4227	25/17036	0.265954	0.820585	0.769732	pcid2/ddx19/thoc3/si:dkeyp-97b10.3/eny2/thoc1/thoc5/gle1	8
GO:0042451	GO:0042451	purine nucleoside biosynthetic process	8/4227	25/17036	0.265954	0.820585	0.769732	nme2a/adkb/adka/nme5/gmps/prtfdc1/impdh2/nme8	8
GO:0046129	GO:0046129	purine ribonucleoside biosynthetic process	8/4227	25/17036	0.265954	0.820585	0.769732	nme2a/adkb/adka/nme5/gmps/prtfdc1/impdh2/nme8	8
GO:0060037	GO:0060037	pharyngeal system development	8/4227	25/17036	0.265954	0.820585	0.769732	pknox1.2/esf1/sparc/dnmt3bb.2/kctd15a/fscn1a/tbx1/ntn1a	8
GO:0071427	GO:0071427	mRNA-containing ribonucleoprotein complex export from nucleus	8/4227	25/17036	0.265954	0.820585	0.769732	pcid2/ddx19/thoc3/si:dkeyp-97b10.3/eny2/thoc1/thoc5/gle1	8
GO:0048871	GO:0048871	multicellular organismal homeostasis	19/4227	66/17036	0.267238	0.820744	0.769881	mcoln1a/lef1/slc27a1b/nxnl2/pde6c/tcf7l2/bves/gdf6a/mcl1a/ift57/ift172/napbb/tjp3/pm20d1.2/mcoln1b/cdipt/acp5a/rp2/piezo1	19
GO:0043434	GO:0043434	response to peptide hormone	24/4227	85/17036	0.267763	0.820744	0.769881	slc27a1b/agtrap/si:ch211-25d12.7/cyp11c1/foxo3a/khk/pkma/pid1/grb10a/si:ch73-21k16.1/stat1a/cyp11a2/cyp11a1/pkmb/socs1a/baiap2l1b/socs2/anxa1a/anxa1b/nr4a2b/stat2/cpeb1b/stat4/stat1b	24
GO:1901652	GO:1901652	response to peptide	24/4227	85/17036	0.267763	0.820744	0.769881	slc27a1b/agtrap/si:ch211-25d12.7/cyp11c1/foxo3a/khk/pkma/pid1/grb10a/si:ch73-21k16.1/stat1a/cyp11a2/cyp11a1/pkmb/socs1a/baiap2l1b/socs2/anxa1a/anxa1b/nr4a2b/stat2/cpeb1b/stat4/stat1b	24
GO:0015849	GO:0015849	organic acid transport	36/4227	131/17036	0.268029	0.820744	0.769881	slc27a1b/slc25a1b/slc38a9/slc27a4/slc25a1a/slc16a9b/slc16a12b/slc16a8/slc16a3/slc38a6/mfsd2aa/slc7a3b/slc7a11/slc13a5b/si:dkeyp-120h9.1/slc6a9/oc90/slc10a4/vps18/slc10a1/slc7a10b/slc25a38a/si:ch211-234h8.7/slc16a6b/zgc:92162/anxa1a/anxa1b/slc19a1/slc32a1/slc7a8a/slc7a9/slc38a7/slc6a6a/slc16a4/slc38a11/zgc:165507	36
GO:0008045	GO:0008045	motor neuron axon guidance	15/4227	51/17036	0.268862	0.820744	0.769881	musk/rac1a/rest/si:ch211-241e1.3/col15a1b/nrxn2a/nrp1a/ntng1a/ntn2/kcnc3a/e2f7/etv5b/ntn1a/e2f8/ntng2a	15
GO:0021532	GO:0021532	neural tube patterning	15/4227	51/17036	0.268862	0.820744	0.769881	arl13b/apc/pax2a/nin/fmr1/rest/wls/rnf152/en2b/pou5f3/wnt10b/wnt1/rarab/slc7a6os/gpr161	15
GO:0001756	GO:0001756	somitogenesis	30/4227	108/17036	0.269074	0.820744	0.769881	lef1/apc/tdgf1/foxh1/dld/rtf1/pcdh10b/pdlim7/dlc/kcnh1a/bcl2l10/cfap20/cap1/rbm24a/chd7/hes6/notch1a/kcnh1b/itga5/sulf1/cav1/axin1/ripply2/pxna/myhz1.1/her7/tbx19/vangl2/mapk14a/efnb2a	30
GO:0048863	GO:0048863	stem cell differentiation	62/4227	232/17036	0.27086	0.820744	0.769881	radil/lef1/jag1a/esf1/dla/epas1a/dld/fgfr3/pdcd2/osr1/rtf1/fgfr2/lbh/npas4l/polr1a/fmr1/anxa6/meis3/dlc/masp1/sema6e/phactr4b/wdr43/wtip/pak1/sema3d/sema4ab/jarid2b/rbm24a/csf3b/chd7/ptch2/sema4e/notch1a/tgfb1b/nrg2a/si:ch211-129c21.1/dnmt3bb.1/nrp1a/sema5a/tph1a/kctd15a/sox10/atp6v0a1a/smarca4a/fscn1a/olfm2a/cax1/sema3c/nos1/tbx1/f11r.1/notch1b/sema5bb/foxd3/vhl/tfap2c/mettl3/fgf3/zic2a/med14/dh…	62
GO:0045595	GO:0045595	regulation of cell differentiation	126/4227	483/17036	0.270959	0.820744	0.769881	lef1/junba/pnx/ewsr1a/musk/smad2/dpysl2b/si:ch211-176g13.7/dbnla/mef2ca/mapk14b/id1/srgap2/tfe3b/cdkl5/neurod2/llgl2/dld/fgfr3/loxl3b/osr1/fgfr2/npas4l/loxl3a/fmr1/smyd5/rest/sirt2/nf1a/csf3r/sema6e/ndrg1b/gnl2/ctbp2a/mdga2a/smyd2a/id2a/alk/pak1/sema3d/rgma/ncaldb/sema4ab/pard6gb/hey1/rbm24a/irf4a/col15a1b/tnr/hes6/sema4e/klf2b/enpp1/atraid/zar1/sh3rf1/id2b/stmn4/arf6a/notch1a/nsmfa/pou5f3/nkx6.1…	126
GO:0010564	GO:0010564	regulation of cell cycle process	45/4227	166/17036	0.271781	0.820744	0.769881	map9/bora/ewsr1a/pmaip1/ect2/psme2/dbf4b/becn1/cep131/pdcd2/zfyve26/mad2l1bp/fbxo5/si:ch1073-266p11.2/aurkb/hormad1/wnt4b/gnl2/dbf4/nek10/fbxo43/gpr132a/mcl1a/cdc14aa/ppp1r7/plk3/dtl/anapc4/stmn4/hnrnpub/insm1a/rb1/rbl2/rab11fip4a/tbl3/e2f7/ccnd2b/mdm1/anxa1a/anxa1b/rab11fip4b/aurka/e2f8/cdc14b/ikbkb	45
GO:0010842	GO:0010842	retina layer formation	12/4227	40/17036	0.275189	0.820744	0.769881	reep6/bves/marcksb/top2b/rx1/dnmt3bb.2/smarca4a/cdipt/dnmt1/foxn4/rp2/cerkl	12
GO:0032543	GO:0032543	mitochondrial translation	12/4227	40/17036	0.275189	0.820744	0.769881	mrps24/coa3a/mrpl43/ptcd3/qrsl1/rars2/mrps7/tufm/mrps34/c1qbp/mtif3/wars2	12
GO:0048545	GO:0048545	response to steroid hormone	12/4227	40/17036	0.275189	0.820744	0.769881	zgc:175135/esr2b/bcl3/paqr7b/ptgs2a/cyp19a1b/abhd2b/cyp11a1/nptna/carm1/anxa1a/anxa1b	12
GO:0015909	GO:0015909	long-chain fatty acid transport	6/4227	18/17036	0.276023	0.820744	0.769881	slc27a1b/slc27a4/oc90/zgc:92162/anxa1a/anxa1b	6
GO:0021548	GO:0021548	pons development	6/4227	18/17036	0.276023	0.820744	0.769881	pax2a/rest/mdga2a/fzd3a/prickle1b/fgf3	6
GO:0021986	GO:0021986	habenula development	6/4227	18/17036	0.276023	0.820744	0.769881	tcf7l2/pitx2/wls/notch1a/pax6a/sec61a1	6
GO:0030307	GO:0030307	positive regulation of cell growth	6/4227	18/17036	0.276023	0.820744	0.769881	dbnla/cdkl5/supv3l1/slc44a4/dbn1/si:dkey-40c11.2	6
GO:0030512	GO:0030512	negative regulation of transforming growth factor beta receptor signaling pathway	6/4227	18/17036	0.276023	0.820744	0.769881	bambia/ids/si:rp71-46j2.7/tdp2b/skilb/skor1a	6
GO:0048255	GO:0048255	mRNA stabilization	6/4227	18/17036	0.276023	0.820744	0.769881	vip/dnd1/hnrnpa0a/syncripl/rbm24a/hnrnpub	6
GO:1903845	GO:1903845	negative regulation of cellular response to transforming growth factor beta stimulus	6/4227	18/17036	0.276023	0.820744	0.769881	bambia/ids/si:rp71-46j2.7/tdp2b/skilb/skor1a	6
GO:0045664	GO:0045664	regulation of neuron differentiation	57/4227	213/17036	0.277195	0.820744	0.769881	musk/dpysl2b/dbnla/id1/cdkl5/neurod2/fmr1/rest/sema6e/gnl2/id2a/alk/pak1/sema3d/rgma/ncaldb/sema4ab/pard6gb/col15a1b/sema4e/id2b/stmn4/arf6a/nkx6.1/arl3l1/dbn1/dpysl3/tcf3b/si:ch211-129c21.1/pacsin1a/ngfa/pik3cd/nrp1a/sema5a/lrrc4bb/plxnb2a/caprin2/plxnc1/sema3c/si:dkey-40c11.2/ntrk2b/her7/plxna1b/sema5bb/ntn1a/plxnb1b/brinp3a.1/brinp3a.2/vax2/si:cabz01029535.1/rbpms2b/fgf3/zmp:0000001168/mapk14a…	57
GO:0000187	GO:0000187	activation of MAPK activity	9/4227	29/17036	0.279174	0.820744	0.769881	paqr7b/alk/ripk1l/ripk2/map2k2b/mapk8ip3/axin1/prok2/map3k12	9
GO:0000302	GO:0000302	response to reactive oxygen species	9/4227	29/17036	0.279174	0.820744	0.769881	per1a/park7/sesn2/prdx1/apoda.2/apodb/cat/anxa1a/anxa1b	9
GO:0002263	GO:0002263	cell activation involved in immune response	9/4227	29/17036	0.279174	0.820744	0.769881	ptenb/loxl3b/cd74a/loxl3a/ptena/eomesa/anxa1a/anxa1b/fes	9
GO:0006505	GO:0006505	GPI anchor metabolic process	9/4227	29/17036	0.279174	0.820744	0.769881	pigo/pigv/pgap2/pigs/mppe1/pign/pigm/pigw/piga	9
GO:0031033	GO:0031033	myosin filament organization	9/4227	29/17036	0.279174	0.820744	0.769881	mef2ca/mybpc1/smyd1a/igfn1.3/igfn1.1/mybpc3/obsl1b/ttn.1/ttn.2	9
GO:0031034	GO:0031034	myosin filament assembly	9/4227	29/17036	0.279174	0.820744	0.769881	mef2ca/mybpc1/smyd1a/igfn1.3/igfn1.1/mybpc3/obsl1b/ttn.1/ttn.2	9
GO:0071688	GO:0071688	striated muscle myosin thick filament assembly	9/4227	29/17036	0.279174	0.820744	0.769881	mef2ca/mybpc1/smyd1a/igfn1.3/igfn1.1/mybpc3/obsl1b/ttn.1/ttn.2	9
GO:0099173	GO:0099173	postsynapse organization	9/4227	29/17036	0.279174	0.820744	0.769881	musk/nlgn2b/dbnla/nlgn3a/dbn1/caprin2/nlgn3b/si:dkey-40c11.2/nlgn2a	9
GO:0080135	GO:0080135	regulation of cellular response to stress	34/4227	124/17036	0.280375	0.820744	0.769881	ing2/spred2a/hyou1/dgat2/nme5/prpf19/fmr1/rnf169/smyd2a/fam168a/mapk8ip2/herpud1/rgma/dusp22a/spred3/spire1a/dusp22b/ripk1l/ripk2/ankrd6b/sh3rf1/rnf121/terf2ip/magi3a/mapk8ip1a/mapk8ip3/axin1/helb/klhdc10/xbp1/ercc8/scrt2/map3k12/cerkl	34
GO:0035967	GO:0035967	cellular response to topologically incorrect protein	17/4227	59/17036	0.281399	0.820744	0.769881	dnajb14/clgn/dnajb12b/dnajb12a/canx/serp1/herpud1/uggt1/calr3b/atf6/sdf2/rnf121/calr3a/hspa5/sdf2l1/xbp1/derl2	17
GO:1990542	GO:1990542	mitochondrial transmembrane transport	17/4227	59/17036	0.281399	0.820744	0.769881	timm10/slc25a1b/slc25a1a/ucp3/ucp2/letm1/cox5b2/timm50/agk/tomm7/timm13/slc25a38a/chchd4b/grpel1/bcl2l16/dnajc15/hspd1	17
GO:0072006	GO:0072006	nephron development	22/4227	78/17036	0.281434	0.820744	0.769881	pkd2/tdgf1/plce1/pax2a/osr1/tmem234/klhl3/kirrel3l/myo1eb/thsd7aa/shroom3/nphs2/sulf1/irx3b/kank2/gdnfb/myo1ca/vcana/myh9a/usp40/sec61a1/p4htm	22
GO:0001881	GO:0001881	receptor recycling	4/4227	11/17036	0.281496	0.820744	0.769881	lamtor1/bves/prkcg/si:ch73-111k22.3	4
GO:0006140	GO:0006140	regulation of nucleotide metabolic process	4/4227	11/17036	0.281496	0.820744	0.769881	nos1/nos2a/scn1lab/shmt2	4
GO:0006482	GO:0006482	protein demethylation	4/4227	11/17036	0.281496	0.820744	0.769881	jmjd1cb/kdm7ab/alkbh4/kdm6ba	4
GO:0008214	GO:0008214	protein dealkylation	4/4227	11/17036	0.281496	0.820744	0.769881	jmjd1cb/kdm7ab/alkbh4/kdm6ba	4
GO:0016102	GO:0016102	diterpenoid biosynthetic process	4/4227	11/17036	0.281496	0.820744	0.769881	lef1/apc/rcor1/rdh10b	4
GO:0016203	GO:0016203	muscle attachment	4/4227	11/17036	0.281496	0.820744	0.769881	dmd/postnb/lama4/lamb2	4
GO:0021513	GO:0021513	spinal cord dorsal/ventral patterning	4/4227	11/17036	0.281496	0.820744	0.769881	sulf1/foxn4/lhx3/evx2	4
GO:0031114	GO:0031114	regulation of microtubule depolymerization	4/4227	11/17036	0.281496	0.820744	0.769881	apc/map1sb/camsap2a/map1aa	4
GO:0031468	GO:0031468	nuclear envelope reassembly	4/4227	11/17036	0.281496	0.820744	0.769881	zdhhc8a/ubxn2a/bmb/tmpoa	4
GO:0032309	GO:0032309	icosanoid secretion	4/4227	11/17036	0.281496	0.820744	0.769881	oc90/zgc:92162/anxa1a/anxa1b	4
GO:0034219	GO:0034219	carbohydrate transmembrane transport	4/4227	11/17036	0.281496	0.820744	0.769881	tmem144b/pid1/slc2a2/slc2a1a	4
GO:0045444	GO:0045444	fat cell differentiation	4/4227	11/17036	0.281496	0.820744	0.769881	tmem120a/enpp1/carm1/ppargc1a	4
GO:0045661	GO:0045661	regulation of myoblast differentiation	4/4227	11/17036	0.281496	0.820744	0.769881	mapk14b/rbm24a/myf6/mapk14a	4
GO:0045840	GO:0045840	positive regulation of mitotic nuclear division	4/4227	11/17036	0.281496	0.820744	0.769881	pmaip1/ppp1r7/anapc4/hnrnpub	4
GO:0050482	GO:0050482	arachidonic acid secretion	4/4227	11/17036	0.281496	0.820744	0.769881	oc90/zgc:92162/anxa1a/anxa1b	4
GO:0051443	GO:0051443	positive regulation of ubiquitin-protein transferase activity	4/4227	11/17036	0.281496	0.820744	0.769881	fzr1b/dcun1d1/cdc20/dcun1d2a	4
GO:0051785	GO:0051785	positive regulation of nuclear division	4/4227	11/17036	0.281496	0.820744	0.769881	pmaip1/ppp1r7/anapc4/hnrnpub	4
GO:0060324	GO:0060324	face development	4/4227	11/17036	0.281496	0.820744	0.769881	jag1b/pitx2/notch2/kdm6a	4
GO:0071715	GO:0071715	icosanoid transport	4/4227	11/17036	0.281496	0.820744	0.769881	oc90/zgc:92162/anxa1a/anxa1b	4
GO:1900107	GO:1900107	regulation of nodal signaling pathway	4/4227	11/17036	0.281496	0.820744	0.769881	osr1/dact2/gdf3/fscn1a	4
GO:1900542	GO:1900542	regulation of purine nucleotide metabolic process	4/4227	11/17036	0.281496	0.820744	0.769881	nos1/nos2a/scn1lab/shmt2	4
GO:1901571	GO:1901571	fatty acid derivative transport	4/4227	11/17036	0.281496	0.820744	0.769881	oc90/zgc:92162/anxa1a/anxa1b	4
GO:1903409	GO:1903409	reactive oxygen species biosynthetic process	4/4227	11/17036	0.281496	0.820744	0.769881	park7/duox/nos1/nos2a	4
GO:1903963	GO:1903963	arachidonate transport	4/4227	11/17036	0.281496	0.820744	0.769881	oc90/zgc:92162/anxa1a/anxa1b	4
GO:2000515	GO:2000515	negative regulation of CD4-positive, alpha-beta T cell activation	4/4227	11/17036	0.281496	0.820744	0.769881	loxl3b/loxl3a/anxa1a/anxa1b	4
GO:2000574	GO:2000574	regulation of microtubule motor activity	4/4227	11/17036	0.281496	0.820744	0.769881	ndel1a/myh11b/ndel1b/si:dkeyp-51b9.3	4
GO:0010975	GO:0010975	regulation of neuron projection development	42/4227	155/17036	0.281501	0.820744	0.769881	musk/dpysl2b/dbnla/cdkl5/fmr1/sema6e/pak1/sema3d/rgma/ncaldb/sema4ab/pard6gb/col15a1b/sema4e/arf6a/nkx6.1/arl3l1/dbn1/dpysl3/si:ch211-129c21.1/pacsin1a/pik3cd/nrp1a/sema5a/lrrc4bb/plxnb2a/caprin2/plxnc1/sema3c/si:dkey-40c11.2/ntrk2b/plxna1b/sema5bb/ntn1a/plxnb1b/vax2/si:cabz01029535.1/rbpms2b/zmp:0000001168/mapk14a/ntrk2a/efhc2	42
GO:0006875	GO:0006875	cellular metal ion homeostasis	61/4227	229/17036	0.28255	0.823047	0.772041	atp1a1a.5/slc24a2/fam155a/si:dkey-28b4.8/pkd2/ryr1a/slc8a1a/letm1/lpar4/abcb7/pde6a/anxa6/atp1b3b/gpr4/stim1a/gpr55a/atp2c1/ptger2a/trpm7/slc30a4/si:ch211-260p9.3/itpr2/herpud1/bcl2l10/trpc6b/slc39a7/atp1b3a/agtr1a/ackr4a/opn4.1/slc39a6/scara5/f2rl1.2/f2rl1.1/zgc:171965/atp2a2b/slc8a4a/trpc2b/trpc5b/cp/ccdc115/atp1b2a/trpc1/zgc:56095/ccr10/fth1b/pth1a/atp2b1b/atp2a1/atp13a1/cax1/tmem203/atp1b1a/p…	61
GO:0006414	GO:0006414	translational elongation	13/4227	44/17036	0.283365	0.823158	0.772146	eef1a1b/si:dkey-175g6.5/eef2k/eef1a1a/dph1/usp16/tcea1/gtpbp1l/ell/si:dkey-37o8.1/tufm/eef2l2/dph3	13
GO:0006611	GO:0006611	protein export from nucleus	13/4227	44/17036	0.283365	0.823158	0.772146	pcid2/ltv1/ddx19/thoc3/si:dkeyp-97b10.3/nmd3/eny2/thoc1/sdad1/rrs1/thoc5/gle1/xpo4	13
GO:0070997	GO:0070997	neuron death	13/4227	44/17036	0.283365	0.823158	0.772146	sppl3/park7/dpysl4/sarm1/psenen/gapdh/foxo3a/tnfrsf21/diablob/ngfa/birc5b/gdnfb/scrt2	13
GO:0051261	GO:0051261	protein depolymerization	18/4227	63/17036	0.28682	0.832432	0.780844	tmod1/apc/cfl1l/tmod4/stmn1b/cfl2/sptb/stmn1a/map1sb/stmn4/camsap2a/mical2b/mical3b/gak/add2/gsnb/dnajc6/map1aa	18
GO:0030239	GO:0030239	myofibril assembly	30/4227	109/17036	0.288147	0.834759	0.783028	dmd/tmod1/myo18aa/mef2ca/slc8a1a/bves/tmod4/smyd2a/prox1a/asb2b/tpm3/rbm24a/myh6/csrp1a/obscnb/sept15/flii/flncb/mybpc1/smyd1a/igfn1.3/igfn1.1/ache/mybpc3/tpcn2/neb/obsl1b/ttn.1/ttn.2/klhl41a	30
GO:0033044	GO:0033044	regulation of chromosome organization	30/4227	109/17036	0.288147	0.834759	0.783028	aurkb/meis3/ehmt2/setdb1a/jarid2b/ppp1r7/anapc4/hnrnpub/jdp2b/hmbox1b/dnmt3bb.2/terf1/prmt6/si:dkey-108k21.10/si:dkey-108k21.21/zgc:153405/si:ch211-113a14.24/tnksb/histh1l/h1m/tlk1b/si:dkey-23a13.9/si:dkey-23a13.17/si:ch73-368j24.11/si:ch73-368j24.12/si:ch1073-153i20.4/zgc:110425/naa40/zgc:163061/phf19	30
GO:0048839	GO:0048839	inner ear development	46/4227	171/17036	0.288898	0.836172	0.784353	dla/apc/sox9a/ptenb/foxj1b/tectb/slc9a3r1a/camk2g1/emx2/pax2a/dcdc2b/jag1b/msx1a/cd74a/sparc/bmper/ahi1/ptena/myo7aa/gas8/slc44a4/pogza/wls/chd7/oc90/adgrg6/cd74b/lrrc23/sox10/ttc25/crb3a/sox9b/hsp90b1/msrb3/gata3/tbx1/nono/ncs1a/tmem132e/tecta/tfap2c/vangl2/fgf3/rhoab/ildr1b/neurod1	46
GO:0006487	GO:0006487	protein N-linked glycosylation	14/4227	48/17036	0.290581	0.840278	0.788205	mogs/mgat4b/syvn1/zgc:92907/mgat1a/fut8a/alk/uggt1/alg3/alg13/mgat5/zgc:194551/zgc:101663/mgat3a	14
GO:0001945	GO:0001945	lymph vessel development	19/4227	67/17036	0.291778	0.840358	0.788279	pkd2/junba/syk/pkd1b/itga9/prkd1/prox1a/rasgrp4/elmo1/cad/ccbe1/stab1/hoxc9a/e2f7/notch1b/bmpr2a/e2f8/acaa2/notch2	19
GO:0072659	GO:0072659	protein localization to plasma membrane	19/4227	67/17036	0.291778	0.840358	0.788279	blzf1/si:dkey-27b3.2/ankrd9/si:dkey-206p8.1/si:ch211-188c16.1/anxa13l/rab15/fybb/ank1b/pacs1a/rnf121/si:ch211-126j24.1/rab3db/nsfa/pigw/zgc:110329/sys1/tspan5a/grip2a	19
GO:0000209	GO:0000209	protein polyubiquitination	25/4227	90/17036	0.292855	0.840358	0.788279	trim2b/klhl3/lnx2b/trim71/rnf144aa/peli2/rnf152/cdc34b/dtl/si:ch211-278j3.3/anapc4/ube2r2/ube2g1b/rnf180/rnf14/ube2b/cdc34a/rnf146/anapc10/znrf1/smurf1/chfr/ercc8/ube2al/wu:fj30f06	25
GO:0003407	GO:0003407	neural retina development	25/4227	90/17036	0.292855	0.840358	0.788279	reep6/prickle2b/pcdh17/bves/gnl2/gdf6a/marcksb/ehmt2/top2b/znf644a/insm1a/rx1/dnmt3bb.2/pax6a/smarca4a/cdipt/igf2bp1/llgl1/dnmt1/foxn4/olfm1a/rp2/six7/dlx1a/cerkl	25
GO:0003094	GO:0003094	glomerular filtration	7/4227	22/17036	0.293253	0.840358	0.788279	farp1/tmem234/myo1eb/thsd7aa/emp2/vcana/myh9a	7
GO:0034308	GO:0034308	primary alcohol metabolic process	7/4227	22/17036	0.293253	0.840358	0.788279	park7/cyp11c1/rdh10b/cyp11a2/cyp11a1/fdx1b/dhrs9	7
GO:0051303	GO:0051303	establishment of chromosome localization	7/4227	22/17036	0.293253	0.840358	0.788279	ndel1a/hnrnpub/birc5b/ndel1b/ccnb1/terb2/cdt1	7
GO:0061014	GO:0061014	positive regulation of mRNA catabolic process	7/4227	22/17036	0.293253	0.840358	0.788279	mettl16/zfp36l1a/pabpc1b/rbm24a/zfp36l1b/cth1/mettl3	7
GO:1905515	GO:1905515	non-motile cilium assembly	7/4227	22/17036	0.293253	0.840358	0.788279	arl13b/cep126/ccdc13/ift57/gorab/tbc1d32/crb3a	7
GO:2000649	GO:2000649	regulation of sodium ion transmembrane transporter activity	7/4227	22/17036	0.293253	0.840358	0.788279	wnk2/scn3b/scn1ba/fxyd1/neto2b/scn1bb/wnk1b	7
GO:0072503	GO:0072503	cellular divalent inorganic cation homeostasis	49/4227	183/17036	0.293798	0.841163	0.789034	slc24a2/fam155a/si:dkey-28b4.8/pkd2/ryr1a/slc8a1a/letm1/lpar4/pde6a/anxa6/gpr4/stim1a/gpr55a/atp2c1/ptger2a/trpm7/slc30a4/si:ch211-260p9.3/itpr2/herpud1/bcl2l10/trpc6b/slc39a7/agtr1a/ackr4a/opn4.1/slc39a6/f2rl1.2/f2rl1.1/zgc:171965/atp2a2b/slc8a4a/trpc2b/trpc5b/trpc1/ccr10/pth1a/atp2b1b/atp2a1/atp13a1/cax1/tmem203/ptger3/zgc:172079/slc39a13/atp2a2a/itpr3/gpr18/p2ry8	49
GO:0019216	GO:0019216	regulation of lipid metabolic process	20/4227	71/17036	0.296335	0.846899	0.794415	lef1/slc27a1b/apc/tysnd1/mid1ip1l/rcor1/opa3/cyp19a1a/mid1ip1b/fam3a/pnpla3/pparaa/pik3ip1/anxa1a/anxa1b/ddit3/cnep1r1/ctdnep1b/acaa2/star	20
GO:0050920	GO:0050920	regulation of chemotaxis	20/4227	71/17036	0.296335	0.846899	0.794415	tdgf1/si:dkey-92i15.4/sema6e/ptk2ba/sema3d/ncaldb/sema4ab/col15a1b/sema4e/arl3l1/si:ch211-129c21.1/nrp1a/sema5a/vegfab/sema3c/sema5bb/vax2/rbpms2b/efnb2a/hspd1	20
GO:0040017	GO:0040017	positive regulation of locomotion	27/4227	98/17036	0.29932	0.853499	0.800606	tacr3l/tdgf1/syk/tacr1b/bves/si:dkey-92i15.4/sema6e/sema3d/cfap20/sema4ab/sema4e/myoc/si:ch211-129c21.1/nrp1a/sema5a/socs1a/vegfab/sema3c/gata3/tek/anxa1a/anxa1b/sema5bb/gnb1b/cd99l2/fgf3/zgc:153759	27
GO:0006626	GO:0006626	protein targeting to mitochondrion	11/4227	37/17036	0.29945	0.853499	0.800606	timm10/timm50/agk/tomm7/timm13/samm50l/pmpca/chchd4b/grpel1/dnajc15/hspd1	11
GO:0055003	GO:0055003	cardiac myofibril assembly	11/4227	37/17036	0.29945	0.853499	0.800606	asb2b/myh6/sept15/mybpc1/igfn1.3/igfn1.1/mybpc3/neb/obsl1b/ttn.1/ttn.2	11
GO:0061387	GO:0061387	regulation of extent of cell growth	21/4227	75/17036	0.300538	0.85487	0.801892	musk/dpysl2b/dbnla/cdkl5/sema6e/sema3d/ncaldb/sema4ab/pard6gb/sema4e/nkx6.1/arl3l1/dbn1/si:ch211-129c21.1/pik3cd/sema5a/sema3c/si:dkey-40c11.2/sema5bb/ntn1a/mapk14a	21
GO:0090305	GO:0090305	nucleic acid phosphodiester bond hydrolysis	21/4227	75/17036	0.300538	0.85487	0.801892	exosc9/rnasekb/ercc4/zgc:195212/exosc3/ercc2/hormad1/gnl2/exosc7/znrd1/ago2/mei4/rexo4/nhp2/exosc10/rrs1/elac2/polr3k/exosc2/rnaseka/abt1	21
GO:0046942	GO:0046942	carboxylic acid transport	35/4227	129/17036	0.300738	0.85487	0.801892	slc27a1b/slc25a1b/slc38a9/slc27a4/slc25a1a/slc16a9b/slc16a12b/slc16a8/slc16a3/slc38a6/mfsd2aa/slc7a3b/slc7a11/slc13a5b/si:dkeyp-120h9.1/slc6a9/oc90/slc10a4/vps18/slc10a1/slc7a10b/slc25a38a/si:ch211-234h8.7/slc16a6b/zgc:92162/anxa1a/anxa1b/slc19a1/slc32a1/slc7a8a/slc7a9/slc38a7/slc16a4/slc38a11/zgc:165507	35
GO:0016055	GO:0016055	Wnt signaling pathway	66/4227	250/17036	0.301335	0.855801	0.802765	gpc5a/tet2/bcl9/lef1/pkd2/apc/grk5/jupa/dvl1b/cby1/bambia/tcf7l2/dact2/ids/dixdc1a/sfrp2l/wnt4b/sybu/rspo3/fzd1/ccdc88c/pak1/grb10a/mylipa/nkd3/ctnnb2/wls/si:dkey-231j24.3/chd8/ankrd6b/fzd3a/dub/rnf14/prdm5/csrp1a/wnt10b/wnt1/ctnnbip1/rnf146/fzd8a/sulf1/amer2/szl/wnt7bb/axin1/axin2/wif1/caprin2/wnt7ba/tnksb/znrf3/dab2/rgs3a/fzd7b/tmem198b/vangl2/vax2/lgr4/tle3b/fgf3/rhoab/eaf2/fzd5/ndp/frzb/fzd4	66
GO:0009755	GO:0009755	hormone-mediated signaling pathway	16/4227	56/17036	0.302767	0.859103	0.805862	slc27a1b/rxfp2a/nr1d4b/rargb/adipor1a/esr2b/nr1d2b/tshr/nr5a1b/abhd2b/rarab/carm1/thraa/pparaa/tshba/adipor1b	16
GO:0019439	GO:0019439	aromatic compound catabolic process	69/4227	262/17036	0.304317	0.859496	0.806232	pcid2/exosc9/tet2/dis3/patl1/pgam1b/parn/smg8/dcps/comtb/pde12/pfklb/heatr1/csdc2a/supv3l1/tbp/vip/dnd1/fmr1/hnrnpa0a/qdpra/exosc3/mettl16/gapdh/gapdhs/eno4/xdh/zfp36l1a/syncripl/gpib/pkma/uraha/exosc7/ago3b/pabpc1b/lin28a/rbm24a/exosc4/pfkpb/nt5e/zfp36l1b/enpp1/hnrnpub/rexo4/pgam2/ncl/ncbp2/exosc10/zgc:103759/pfkma/eno3/pfkpa/fen1/pkmb/cnp/hmox1a/carhsp1/snd1/exosc2/scn1lab/pfkmb/fah/cth1/mettl3…	69
GO:0034728	GO:0034728	nucleosome organization	22/4227	79/17036	0.30443	0.859496	0.806232	psme4a/si:dkey-108k21.10/si:dkey-108k21.21/si:ch73-36p18.1/zgc:153405/zgc:110216/si:ch211-113a14.18/si:ch211-113a14.24/smarca1/histh1l/h1m/si:dkey-148h10.5/pbrm1l/si:dkey-23a13.9/si:dkey-23a13.17/si:ch73-368j24.11/si:ch73-368j24.12/si:ch1073-153i20.4/zgc:110425/zgc:163061/piwil1/ttn.2	22
GO:0046513	GO:0046513	ceramide biosynthetic process	8/4227	26/17036	0.306699	0.859496	0.806232	smpd1/degs1/cers3b/cers2a/st6galnac6/smpd4/cers1/cers5	8
GO:0050714	GO:0050714	positive regulation of protein secretion	8/4227	26/17036	0.306699	0.859496	0.806232	hmgb1a/tcf7l2/panx1a/hmgb1b/rfx6/scamp5a/ano1/zgc:153759	8
GO:0060872	GO:0060872	semicircular canal development	8/4227	26/17036	0.306699	0.859496	0.806232	jag1b/sparc/wls/adgrg6/sox10/tbx1/ncs1a/ildr1b	8
GO:0006883	GO:0006883	cellular sodium ion homeostasis	5/4227	15/17036	0.307275	0.859496	0.806232	atp1a1a.5/atp1b3b/atp1b3a/atp1b2a/atp1b1a	5
GO:0008345	GO:0008345	larval locomotory behavior	5/4227	15/17036	0.307275	0.859496	0.806232	psd2/fbxo32/pogza/slc1a2b/kcnj10a	5
GO:0016114	GO:0016114	terpenoid biosynthetic process	5/4227	15/17036	0.307275	0.859496	0.806232	lef1/apc/fdps/rcor1/rdh10b	5
GO:0030537	GO:0030537	larval behavior	5/4227	15/17036	0.307275	0.859496	0.806232	psd2/fbxo32/pogza/slc1a2b/kcnj10a	5
GO:0034767	GO:0034767	positive regulation of ion transmembrane transport	5/4227	15/17036	0.307275	0.859496	0.806232	wnk2/park7/stim1a/ano6/wnk1b	5
GO:0038092	GO:0038092	nodal signaling pathway	5/4227	15/17036	0.307275	0.859496	0.806232	tdgf1/osr1/dact2/gdf3/fscn1a	5
GO:0043101	GO:0043101	purine-containing compound salvage	5/4227	15/17036	0.307275	0.859496	0.806232	adkb/adka/prtfdc1/ampd2a/aprt	5
GO:0043954	GO:0043954	cellular component maintenance	5/4227	15/17036	0.307275	0.859496	0.806232	supv3l1/yes1/cdipt/cdh1/lnpa	5
GO:0051438	GO:0051438	regulation of ubiquitin-protein transferase activity	5/4227	15/17036	0.307275	0.859496	0.806232	fbxo5/fzr1b/dcun1d1/cdc20/dcun1d2a	5
GO:0090148	GO:0090148	membrane fission	5/4227	15/17036	0.307275	0.859496	0.806232	mxa/mxb/mxg/mxc/mxe	5
GO:0099172	GO:0099172	presynapse organization	5/4227	15/17036	0.307275	0.859496	0.806232	nlgn2b/nlgn3a/nlgn3b/pappaa/nlgn2a	5
GO:0032006	GO:0032006	regulation of TOR signaling	17/4227	60/17036	0.307971	0.859496	0.806232	slc38a9/mlst8/ddit4/sik2b/lamtor1/ros1/sesn2/rnf152/ift57/ift172/si:ch211-22d5.2/tnfaip8l1/rheb/bmt2/lamtor4/si:cabz01029535.1/ift81	17
GO:0006323	GO:0006323	DNA packaging	23/4227	83/17036	0.308045	0.859496	0.806232	ncapd3/psme4a/top2b/si:dkey-108k21.10/si:dkey-108k21.21/si:ch73-36p18.1/zgc:153405/zgc:110216/si:ch211-113a14.18/si:ch211-113a14.24/smarca1/histh1l/h1m/si:dkey-148h10.5/si:dkey-23a13.9/si:dkey-23a13.17/si:ch73-368j24.11/si:ch73-368j24.12/si:ch1073-153i20.4/zgc:110425/zgc:163061/piwil1/ttn.2	23
GO:0043624	GO:0043624	cellular protein complex disassembly	23/4227	83/17036	0.308045	0.859496	0.806232	tmod1/apc/cfl1l/tmod4/stmn1b/cfl2/sptb/stmn1a/map1sb/stmn4/napbb/camsap2a/mical2b/nsfa/mical3b/gak/add2/gsnb/si:ch211-275j6.5/dnajc6/ogfod1/map1aa/gle1	23
GO:0007163	GO:0007163	establishment or maintenance of cell polarity	31/4227	114/17036	0.310185	0.863687	0.810163	dlg2/rhoq/ndel1a/llgl2/dlg3/wtip/pard6a/pard6gb/cap1/si:ch211-13f8.1/rhov/si:dkey-6b12.5/si:dkey-121a11.3/parvb/parvg/rras/llgl1/fscn1a/ndel1b/fscn2a/rhogc/notch1b/ccdc151/atp1b1a/dlg1/vangl2/cdh1/parvab/rhoab/epb41l5/ptprbl	31
GO:0010648	GO:0010648	negative regulation of cell communication	92/4227	353/17036	0.310362	0.863687	0.810163	rasa3/slc24a2/neurl1aa/jag1a/spred2a/apc/hyou1/rargb/jupa/rap1ab/si:ch211-25d12.7/cby1/bambia/ddit4/jag1b/dact2/nme5/si:ch211-39i2.2/dusp1/prpf19/ids/si:rp71-46j2.7/tnmd/rest/tnfaip1/sik2b/sarm1/nf1a/sox4b/pde11al/phactr4b/gdf6a/rspo3/gpatch3/lgals3b/herpud1/spred3/pid1/mcl1a/grb10a/mylipa/tdp2b/sesn2/nkd3/rnf152/ptch2/chd8/ankrd6b/akap12b/chac1/sox11b/si:ch211-22d5.2/tnfaip8l1/pias4a/amh/wwtr1/c…	92
GO:0023057	GO:0023057	negative regulation of signaling	92/4227	353/17036	0.310362	0.863687	0.810163	rasa3/slc24a2/neurl1aa/jag1a/spred2a/apc/hyou1/rargb/jupa/rap1ab/si:ch211-25d12.7/cby1/bambia/ddit4/jag1b/dact2/nme5/si:ch211-39i2.2/dusp1/prpf19/ids/si:rp71-46j2.7/tnmd/rest/tnfaip1/sik2b/sarm1/nf1a/sox4b/pde11al/phactr4b/gdf6a/rspo3/gpatch3/lgals3b/herpud1/spred3/pid1/mcl1a/grb10a/mylipa/tdp2b/sesn2/nkd3/rnf152/ptch2/chd8/ankrd6b/akap12b/chac1/sox11b/si:ch211-22d5.2/tnfaip8l1/pias4a/amh/wwtr1/c…	92
GO:0035966	GO:0035966	response to topologically incorrect protein	18/4227	64/17036	0.312698	0.866236	0.812554	dnajb14/clgn/dnajb12b/dnajb12a/canx/serp1/herpud1/uggt1/calr3b/chac1/atf6/sdf2/rnf121/calr3a/hspa5/sdf2l1/xbp1/derl2	18
GO:0044272	GO:0044272	sulfur compound biosynthetic process	18/4227	64/17036	0.312698	0.866236	0.812554	si:dkey-26i13.5/chst12b/mat2aa/chst3b/elovl6l/chst3a/mettl16/acss1/elovl1a/gss/csad/elovl4b/pdha1a/chst7/glceb/gclm/elovl7a/elovl7b	18
GO:0072507	GO:0072507	divalent inorganic cation homeostasis	52/4227	196/17036	0.312967	0.866236	0.812554	slc24a2/wfs1a/fam155a/si:dkey-28b4.8/pkd2/ryr1a/slc8a1a/letm1/cnnm2a/lpar4/pde6a/anxa6/gpr4/stim1a/gpr55a/atp2c1/ptger2a/trpm7/slc30a4/si:ch211-260p9.3/itpr2/herpud1/bcl2l10/trpc6b/slc39a7/agtr1a/ackr4a/opn4.1/slc39a6/f2rl1.2/f2rl1.1/zgc:171965/atp2a2b/slc8a4a/trpc2b/trpc5b/trpc1/ccr10/pth1a/atp2b1b/atp2a1/atp13a1/cax1/tmem203/casr/ptger3/zgc:172079/slc39a13/atp2a2a/itpr3/gpr18/p2ry8	52
GO:0120035	GO:0120035	regulation of plasma membrane bounded cell projection organization	53/4227	200/17036	0.314231	0.866236	0.812554	gpm6ab/musk/dpysl2b/dbnla/cdkl5/cdc42ep1a/cdc42ep4b/fmr1/sema6e/sh3yl1/pak1/sema3d/rgma/ncaldb/sema4ab/pard6gb/col15a1b/sema4e/ezrb/arf6a/nkx6.1/arl3l1/dbn1/dpysl3/si:ch211-129c21.1/pacsin1a/pik3cd/nrp1a/sema5a/lrrc4bb/cdc42ep1b/crb3a/plxnb2a/caprin2/plxnc1/atp6v1f/sema3c/cdc42ep2/si:dkey-40c11.2/ntrk2b/inpp5e/plxna1b/sema5bb/ntn1a/plxnb1b/vax2/si:cabz01029535.1/rbpms2b/zmp:0000001168/mapk14a/eps…	53
GO:0198738	GO:0198738	cell-cell signaling by wnt	66/4227	251/17036	0.314386	0.866236	0.812554	gpc5a/tet2/bcl9/lef1/pkd2/apc/grk5/jupa/dvl1b/cby1/bambia/tcf7l2/dact2/ids/dixdc1a/sfrp2l/wnt4b/sybu/rspo3/fzd1/ccdc88c/pak1/grb10a/mylipa/nkd3/ctnnb2/wls/si:dkey-231j24.3/chd8/ankrd6b/fzd3a/dub/rnf14/prdm5/csrp1a/wnt10b/wnt1/ctnnbip1/rnf146/fzd8a/sulf1/amer2/szl/wnt7bb/axin1/axin2/wif1/caprin2/wnt7ba/tnksb/znrf3/dab2/rgs3a/fzd7b/tmem198b/vangl2/vax2/lgr4/tle3b/fgf3/rhoab/eaf2/fzd5/ndp/frzb/fzd4	66
GO:0001819	GO:0001819	positive regulation of cytokine production	13/4227	45/17036	0.314401	0.866236	0.812554	hmgb1a/panx1a/zbtb16b/hmgb1b/gpatch3/tlr5b/tlr5a/sulf1/scamp5a/anxa1a/anxa1b/zgc:153759/ddx58	13
GO:0090501	GO:0090501	RNA phosphodiester bond hydrolysis	13/4227	45/17036	0.314401	0.866236	0.812554	exosc9/exosc3/gnl2/exosc7/znrd1/ago2/nhp2/exosc10/rrs1/elac2/polr3k/exosc2/abt1	13
GO:0031347	GO:0031347	regulation of defense response	25/4227	91/17036	0.31456	0.866236	0.812554	hmgb1a/tlr8b/sarm1/hmgb1b/tnfrsf1a/gpatch3/tlr5b/tlr5a/hmgb3b/si:ch73-63e15.2/pias4a/cd40/cav1/socs1a/brd4/irak3/b2m/anxa1a/anxa1b/mettl3/hmgb3a/lgr4/serping1/ggt1a/ddx58	25
GO:0035282	GO:0035282	segmentation	33/4227	122/17036	0.3148	0.866236	0.812554	lef1/apc/tdgf1/foxh1/dld/rtf1/pcdh10b/pdlim7/dlc/kcnh1a/bcl2l10/cfap20/cap1/rbm24a/chd7/buc/hes6/notch1a/pou5f3/kcnh1b/wnt1/itga5/sulf1/cav1/axin1/ripply2/pxna/myhz1.1/her7/tbx19/vangl2/mapk14a/efnb2a	33
GO:1904888	GO:1904888	cranial skeletal system development	55/4227	208/17036	0.316641	0.866236	0.812554	ptpn11a/auts2a/rap1ab/ece1/chd5/ep300a/nolc1/meis1b/loxl3b/polr1c/jag1b/runx3/lbh/polr1a/pitx2/masp1/macc1/itga8/gpatch3/wdr43/meis2a/pak1/rit1/dlx5a/tinagl1/rbm24a/wls/chd7/pkn2/prrx1a/mmachc/ahsa1a/prrx1b/specc1lb/prdm5/usp21/ptpn11b/itga5/sox10/smarca4a/xylt1/fscn1a/usp18/cacna1c/gata3/tbx1/myo1ha/fgf3/tp73/usp37/dlx1a/zic2a/kdm6a/med14/dhrs9	55
GO:0042461	GO:0042461	photoreceptor cell development	19/4227	68/17036	0.317013	0.866236	0.812554	arl13b/kif17/ninl/gucy2f/bves/ahi1/ift57/rp1l1b/sox11b/dzank1/cc2d2a/dnmt3bb.2/ttc26/rp2/vangl2/six7/adipor1b/cerkl/neurod1	19
GO:0090066	GO:0090066	regulation of anatomical structure size	69/4227	263/17036	0.317115	0.866236	0.812554	tmod1/musk/dpysl2b/si:ch211-176g13.8/dbnla/cdkl5/rac3b/trpm4b.1/baiap2l1a/cdc42ep1a/cdc42ep4b/fmn2b/vip/zgc:158689/tmod4/sema6e/spire1b/si:ch211-175f11.5/evla/sptb/clns1a/slc12a1/sema3d/vaspb/ncaldb/pex11b/sema4ab/pard6gb/spire1a/slc12a7a/agtr1a/sema4e/arpc5b/nkx6.1/arl3l1/dbn1/si:ch211-129c21.1/pfn2/htr2b/zgc:114123/avpr2ab/pik3cd/sema5a/twf1a/cdc42ep1b/trpm4a/rac3a/zgc:86896/baiap2a/kank2/baiap…	69
GO:0016051	GO:0016051	carbohydrate biosynthetic process	26/4227	95/17036	0.317507	0.866236	0.812554	si:dkey-26i13.5/chst12b/nansa/g6pc3/pgp/phkg2/maea/ext1a/b3gnt2b/gpib/has3/arpp19a/ext1b/extl2/gyg1a/pask/pcxa/zgc:194551/b3gnt7/fam3a/si:ch211-236h17.3/impa2/gyg1b/gys2/fam3c/pcxb	26
GO:0017001	GO:0017001	antibiotic catabolic process	9/4227	30/17036	0.317547	0.866236	0.812554	zgc:63568/zgc:77938/prdx1/prdx6/prdx5/cat/hbba2/hbaa2/prdx4	9
GO:0019226	GO:0019226	transmission of nerve impulse	9/4227	30/17036	0.317547	0.866236	0.812554	scn4aa/cacng7a/scn12aa/rnf121/scn4ab/cacna1ha/cacng4b/scn1lab/ccdc141	9
GO:0031647	GO:0031647	regulation of protein stability	9/4227	30/17036	0.317547	0.866236	0.812554	cdc37l1/park7/meis1b/gapdh/hsp90aa1.2/usp28/szl/usp40/mapk14a	9
GO:0032963	GO:0032963	collagen metabolic process	9/4227	30/17036	0.317547	0.866236	0.812554	pkd2/mmp13a/pkd1b/mmp28/mmp23bb/mmp11b/mmp15a/mmp24/plod1a	9
GO:0043094	GO:0043094	cellular metabolic compound salvage	9/4227	30/17036	0.317547	0.866236	0.812554	adkb/adka/uck2b/prtfdc1/uck1/ampd2a/uckl1b/aprt/uck2a	9
GO:0051208	GO:0051208	sequestering of calcium ion	9/4227	30/17036	0.317547	0.866236	0.812554	pkd2/ryr1a/letm1/anxa6/si:ch211-260p9.3/itpr2/bcl2l10/opn4.1/itpr3	9
GO:0051282	GO:0051282	regulation of sequestering of calcium ion	9/4227	30/17036	0.317547	0.866236	0.812554	pkd2/ryr1a/letm1/anxa6/si:ch211-260p9.3/itpr2/bcl2l10/opn4.1/itpr3	9
GO:0051283	GO:0051283	negative regulation of sequestering of calcium ion	9/4227	30/17036	0.317547	0.866236	0.812554	pkd2/ryr1a/letm1/anxa6/si:ch211-260p9.3/itpr2/bcl2l10/opn4.1/itpr3	9
GO:0070509	GO:0070509	calcium ion import	9/4227	30/17036	0.317547	0.866236	0.812554	fam155a/lgals3b/cacna1sa/cacna1aa/cacna1ha/cacna1c/cacna1ba/cacna1sb/bcl2l16	9
GO:2000736	GO:2000736	regulation of stem cell differentiation	9/4227	30/17036	0.317547	0.866236	0.812554	dld/fgfr3/fgfr2/npas4l/rbm24a/dnmt3bb.1/tph1a/f11r.1/mettl3	9
GO:0060485	GO:0060485	mesenchyme development	57/4227	216/17036	0.318908	0.869202	0.815336	radil/fbxl18/lef1/esf1/dla/tdgf1/rargb/snai1a/llgl2/dld/rtf1/fgfr2/lbh/polr1a/fmr1/sept6/pcdh10b/anxa6/meis3/dlc/masp1/bmper/sema6e/phactr4b/wtip/pak1/sema3d/sema4ab/chd7/prrx1a/slc39a6/sema4e/nrg2a/si:ch211-129c21.1/nrp1a/sema5a/ek1/kctd15a/sox10/atp6v0a1a/smarca4a/fscn1a/olfm2a/sox9b/gpr22a/cax1/sema3c/tbx1/vcana/sema5bb/foxd3/parp3/tfap2c/fgf3/zic2a/med14/dhrs9	57
GO:0043583	GO:0043583	ear development	46/4227	173/17036	0.320273	0.871369	0.817369	dla/apc/sox9a/ptenb/foxj1b/tectb/slc9a3r1a/camk2g1/emx2/pax2a/dcdc2b/jag1b/msx1a/cd74a/sparc/bmper/ahi1/ptena/myo7aa/gas8/slc44a4/pogza/wls/chd7/oc90/adgrg6/cd74b/lrrc23/sox10/ttc25/crb3a/sox9b/hsp90b1/msrb3/gata3/tbx1/nono/ncs1a/tmem132e/tecta/tfap2c/vangl2/fgf3/rhoab/ildr1b/neurod1	46
GO:0061982	GO:0061982	meiosis I cell cycle process	14/4227	49/17036	0.320526	0.871369	0.817369	meiob/ercc4/eme1/zgc:195212/msh5/hormad1/msh4/top2b/hfm1/mei4/syce2/terb2/m1ap/rmi1	14
GO:0120032	GO:0120032	regulation of plasma membrane bounded cell projection assembly	14/4227	49/17036	0.320526	0.871369	0.817369	gpm6ab/cdc42ep1a/cdc42ep4b/fmr1/sh3yl1/ezrb/dpysl3/nrp1a/cdc42ep1b/crb3a/atp6v1f/cdc42ep2/inpp5e/eps8l3b	14
GO:0060070	GO:0060070	canonical Wnt signaling pathway	37/4227	138/17036	0.322777	0.873476	0.819345	gpc5a/bcl9/lef1/apc/dvl1b/bambia/tcf7l2/ids/dixdc1a/sybu/rspo3/pak1/ctnnb2/si:dkey-231j24.3/ankrd6b/fzd3a/rnf14/prdm5/rnf146/fzd8a/amer2/szl/axin1/wif1/caprin2/tnksb/znrf3/dab2/fzd7b/tmem198b/vangl2/lgr4/tle3b/fzd5/ndp/frzb/fzd4	37
GO:0010720	GO:0010720	positive regulation of cell development	28/4227	103/17036	0.322878	0.873476	0.819345	lef1/smad2/dbnla/cdkl5/rest/rbm24a/zar1/dbn1/serpinf1/tcf3b/pacsin1a/neurod6a/lgals2a/pde3a/plxnb2a/caprin2/plxnc1/myf6/gata3/si:dkey-40c11.2/ntrk2b/plxna1b/plxnb1b/brinp3a.1/brinp3a.2/fgf3/ntrk2a/dlx1a	28
GO:0031101	GO:0031101	fin regeneration	21/4227	76/17036	0.324616	0.873476	0.819345	lef1/hoxc13b/galnt2/jag1b/tnfrsf1a/ctsba/sema3d/krt17/pou5f3/cldnc/prdx5/acvr1ba/hoxc13a/smarca4a/axin1/atp6v1e1b/gata3/anxa1a/notch1b/hspd1/agr1	21
GO:0007568	GO:0007568	aging	6/4227	19/17036	0.325109	0.873476	0.819345	ing2/cisd2/becn1/pcgf1/apoda.2/apodb	6
GO:0032526	GO:0032526	response to retinoic acid	6/4227	19/17036	0.325109	0.873476	0.819345	rargb/nr2f5/rxraa/rarab/brinp3a.1/brinp3a.2	6
GO:0033260	GO:0033260	nuclear DNA replication	6/4227	19/17036	0.325109	0.873476	0.819345	dbf4b/dbf4/orc3/mcm3/mcm6/cdt1	6
GO:0043270	GO:0043270	positive regulation of ion transport	6/4227	19/17036	0.325109	0.873476	0.819345	wnk2/park7/stim1a/lgals3b/ano6/wnk1b	6
GO:0043489	GO:0043489	RNA stabilization	6/4227	19/17036	0.325109	0.873476	0.819345	vip/dnd1/hnrnpa0a/syncripl/rbm24a/hnrnpub	6
GO:0046634	GO:0046634	regulation of alpha-beta T cell activation	6/4227	19/17036	0.325109	0.873476	0.819345	loxl3b/loxl3a/sh3rf1/anxa1a/anxa1b/zgc:153759	6
GO:0048752	GO:0048752	semicircular canal morphogenesis	6/4227	19/17036	0.325109	0.873476	0.819345	jag1b/sparc/adgrg6/sox10/tbx1/ncs1a	6
GO:0060541	GO:0060541	respiratory system development	6/4227	19/17036	0.325109	0.873476	0.819345	loxl3b/loxl3a/marcksb/foxg1a/thraa/axin1	6
GO:1902373	GO:1902373	negative regulation of mRNA catabolic process	6/4227	19/17036	0.325109	0.873476	0.819345	vip/dnd1/hnrnpa0a/syncripl/rbm24a/hnrnpub	6
GO:0007160	GO:0007160	cell-matrix adhesion	15/4227	53/17036	0.325965	0.873476	0.819345	blzf1/myo18aa/si:dkey-32n7.7/si:ch211-39f2.3/nid1a/si:dkey-71b5.7/ddr2b/myoc/itgb1a/ek1/parvb/tecta/itgb4/itgb5/itgbl1	15
GO:0009612	GO:0009612	response to mechanical stimulus	15/4227	53/17036	0.325965	0.873476	0.819345	pkd2/junba/lhfpl5a/alpl/pkd1b/dcst1/myo7aa/trpn1/dlx5a/trpa1a/trpa1b/atp2a1/tmc1/tmem132e/piezo1	15
GO:0051168	GO:0051168	nuclear export	15/4227	53/17036	0.325965	0.873476	0.819345	pcid2/ltv1/ddx19/lsg1/thoc3/si:dkeyp-97b10.3/nmd3/eny2/thoc1/sdad1/ncbp2/rrs1/thoc5/gle1/xpo4	15
GO:0071599	GO:0071599	otic vesicle development	15/4227	53/17036	0.325965	0.873476	0.819345	apc/sox9a/slc9a3r1a/pax2a/msx1a/sparc/bmper/ahi1/pogza/sox10/sox9b/gata3/nono/tfap2c/fgf3	15
GO:0014065	GO:0014065	phosphatidylinositol 3-kinase signaling	10/4227	34/17036	0.326523	0.873476	0.819345	pik3c2b/nyap2a/pik3c2a/kdr/pik3cd/zgc:158659/pik3r6b/tek/ntrk2b/ntrk2a	10
GO:0071600	GO:0071600	otic vesicle morphogenesis	10/4227	34/17036	0.326523	0.873476	0.819345	sox9a/pax2a/msx1a/sparc/bmper/sox10/sox9b/gata3/tfap2c/fgf3	10
GO:1903313	GO:1903313	positive regulation of mRNA metabolic process	10/4227	34/17036	0.326523	0.873476	0.819345	mettl16/zfp36l1a/pabpc1b/rbm24a/zfp36l1b/celf4/cth1/mettl3/cpeb1b/dhx37	10
GO:0031331	GO:0031331	positive regulation of cellular catabolic process	22/4227	80/17036	0.327985	0.876649	0.822321	hmgb1a/dda1/trib3/tp53inp2/supv3l1/sirt2/mettl16/hmgb1b/rnf144aa/zfp36l1a/pabpc1b/sesn2/rbm24a/rnf152/zfp36l1b/si:ch211-278j3.3/rnf180/rnf14/pnpla3/cth1/mettl3/wu:fj30f06	22
GO:1905114	GO:1905114	cell surface receptor signaling pathway involved in cell-cell signaling	69/4227	264/17036	0.330097	0.881553	0.826921	gpc5a/tet2/bcl9/lef1/pkd2/apc/grk5/jupa/dvl1b/cby1/bambia/tcf7l2/dact2/ids/dixdc1a/sfrp2l/wnt4b/sybu/rspo3/fzd1/ccdc88c/pak1/grin2da/grb10a/mylipa/nkd3/ctnnb2/wls/si:dkey-231j24.3/slc6a9/chd8/ankrd6b/fzd3a/dub/rnf14/prdm5/csrp1a/wnt10b/wnt1/ctnnbip1/rnf146/fzd8a/sulf1/amer2/szl/wnt7bb/grin2aa/axin1/axin2/wif1/caprin2/wnt7ba/tnksb/znrf3/dab2/rgs3a/fzd7b/tmem198b/vangl2/vax2/lgr4/tle3b/fgf3/rhoab/e…	69
GO:0072593	GO:0072593	reactive oxygen species metabolic process	16/4227	57/17036	0.330833	0.882034	0.827372	cybb/park7/noxo1b/sirt2/pid1/prdx1/prdx6/prdx5/cat/duox/hbba2/hbaa2/noxo1a/prdx4/nos1/nos2a	16
GO:0140013	GO:0140013	meiotic nuclear division	16/4227	57/17036	0.330833	0.882034	0.827372	meiob/ercc4/eme1/fbxo5/msh5/hormad1/fbxo43/msh4/top2b/hfm1/mei4/birc5b/syce2/terb2/m1ap/rmi1	16
GO:1903522	GO:1903522	regulation of blood circulation	23/4227	84/17036	0.33111	0.882034	0.827372	melk/pkd2/grk5/slc8a1a/trpm4b.1/scn3b/s100a1/scn1ba/trpm7/hcn4/scn1bb/prrx1a/agtr1a/scn12aa/avpr2ab/parvb/hcn4l/kcnh6a/trpm4a/cacna1c/foxn4/mybpc3/atp2a2a	23
GO:0042246	GO:0042246	tissue regeneration	33/4227	123/17036	0.333893	0.882363	0.827681	lef1/hoxc13b/prph/si:ch1073-278o19.1/becn1/six3b/galnt2/jag1b/hbegfa/tnfrsf1a/ctsba/sema3d/krt17/insm1a/pou5f3/cldnc/prdx5/mgat5/acvr1ba/hoxc13a/cav1/smarca4a/axin1/atp6v1e1b/gata3/anxa1a/anxa1b/notch1b/mustn1a/mdka/notch2/hspd1/agr1	33
GO:0051402	GO:0051402	neuron apoptotic process	11/4227	38/17036	0.334096	0.882363	0.827681	sppl3/park7/psenen/gapdh/foxo3a/tnfrsf21/diablob/ngfa/birc5b/gdnfb/scrt2	11
GO:0071248	GO:0071248	cellular response to metal ion	11/4227	38/17036	0.334096	0.882363	0.827681	pkd2/hvcn1/cpne4a/cpne2/syt12/syt9b/cpne8/rasa4/sumo1/syt13/cpne7	11
GO:1903532	GO:1903532	positive regulation of secretion by cell	11/4227	38/17036	0.334096	0.882363	0.827681	hmgb1a/tcf7l2/vip/panx1a/hmgb1b/rfx6/rab27b/scamp5a/cacna1ha/ano1/zgc:153759	11
GO:0045934	GO:0045934	negative regulation of nucleobase-containing compound metabolic process	124/4227	482/17036	0.335518	0.882363	0.827681	eed/lef1/junba/pnx/smad2/per1a/smad9/nr2f1b/nr1d4b/rargb/id1/maf1/sox13/foxh1/hexim1/six3b/osr1/vip/aurkb/dnd1/dpf2l/hnrnpa0a/rest/rnf169/sirt2/rrp8/zbtb16b/erfl3/atxn1b/osr2/foxo3a/si:ch211-160f23.5/gcfc2/smyd2a/prox1a/id2a/mta1/syncripl/ccpg1/tshz3a/tcf25/eomesa/setdb1a/zfpm2b/nr1d2b/jarid2b/gmnn/hey1/rbm24a/bmi1b/mycb/chd8/homeza/hes6/mbd3a/si:dkeyp-68b7.7/vrtn/dpf3/si:ch211-195d17.2/id2b/hnrn…	124
GO:0006457	GO:0006457	protein folding	34/4227	127/17036	0.335768	0.882363	0.827681	pdia2/dnajb14/clgn/dnaja1/cdc37l1/dnajb13/tbcc/dnajb12b/dnajb12a/canx/calr3b/suco/ppil6/hsp90aa1.2/calr3a/emc1/pdia4/ppib/pdia3/trap1/dnaja3a/hsp90b1/hspa5/tbcelb/tor2a/dnajc25/p4hb/chchd4b/ppil1/vbp1/grpel1/ftr52p/hspd1/dnajb11	34
GO:0001667	GO:0001667	ameboidal-type cell migration	61/4227	233/17036	0.336982	0.882363	0.827681	radil/lef1/syk/plekhg5a/snai1a/rac1a/foxh1/zbtb4/lbh/diaph2/anxa6/bace2/meis3/masp1/psenen/kcnj13/apoc1/sema6e/phactr4b/pak1/slc24a5/sema3d/eomesa/sema4ab/thsd7aa/cap1/chd7/slc39a6/sema4e/ankrd6b/ezrb/ccbe1/nrg2a/si:ch211-129c21.1/csrp1a/itga5/plekhg5b/nrp1a/sema5a/fbln1/celsr1b/cald1b/sox10/atp6v0a1a/pdxdc1/fscn1a/sema3c/tek/pxna/tbx1/anxa1a/mks1/anxa1b/sema5bb/foxd3/vangl2/cdh1/rhoab/bcl2l16/ea…	61
GO:0007019	GO:0007019	microtubule depolymerization	7/4227	23/17036	0.33834	0.882363	0.827681	apc/stmn1b/stmn1a/map1sb/stmn4/camsap2a/map1aa	7
GO:0009225	GO:0009225	nucleotide-sugar metabolic process	7/4227	23/17036	0.33834	0.882363	0.827681	gne/ugp2a/gnpnat1/zgc:100864/gmppb/pgm3/uap1l1	7
GO:0033014	GO:0033014	tetrapyrrole biosynthetic process	7/4227	23/17036	0.33834	0.882363	0.827681	hmbsb/iba57/mmachc/tmem14ca/slc25a39/alad/cpox	7
GO:0046631	GO:0046631	alpha-beta T cell activation	7/4227	23/17036	0.33834	0.882363	0.827681	loxl3b/loxl3a/eomesa/sh3rf1/anxa1a/anxa1b/zgc:153759	7
GO:0050000	GO:0050000	chromosome localization	7/4227	23/17036	0.33834	0.882363	0.827681	ndel1a/hnrnpub/birc5b/ndel1b/ccnb1/terb2/cdt1	7
GO:0051048	GO:0051048	negative regulation of secretion	7/4227	23/17036	0.33834	0.882363	0.827681	rap1ab/tnfrsf21/amh/anxa1a/anxa1b/ptger3/lgr4	7
GO:0061951	GO:0061951	establishment of protein localization to plasma membrane	7/4227	23/17036	0.33834	0.882363	0.827681	blzf1/si:dkey-27b3.2/si:dkey-206p8.1/anxa13l/nsfa/sys1/grip2a	7
GO:1901071	GO:1901071	glucosamine-containing compound metabolic process	7/4227	23/17036	0.33834	0.882363	0.827681	chst3b/chst3a/si:ch211-286b4.4/chst2a/chia.4/mgat3a/chst7	7
GO:1902305	GO:1902305	regulation of sodium ion transmembrane transport	7/4227	23/17036	0.33834	0.882363	0.827681	wnk2/scn3b/scn1ba/fxyd1/neto2b/scn1bb/wnk1b	7
GO:0031290	GO:0031290	retinal ganglion cell axon guidance	12/4227	42/17036	0.340588	0.882363	0.827681	apc/alcamb/gdf6a/sema3d/top2b/ptch2/rb1/nrp1a/dzip1/vax2/rbpms2b/col4a5	12
GO:0032272	GO:0032272	negative regulation of protein polymerization	12/4227	42/17036	0.340588	0.882363	0.827681	tmod1/eml2/tmod4/si:ch211-175f11.5/sptb/twf1a/kank2/add2/kank1b/kank1a/gsnb/kank3	12
GO:0051091	GO:0051091	positive regulation of DNA-binding transcription factor activity	12/4227	42/17036	0.340588	0.882363	0.827681	arid5b/pprc1/bcl10/lpar5a/terf2ip/traf5/mbtps2/irak3/sox19b/gtf2a2/ppargc1a/ikbkb	12
GO:0055002	GO:0055002	striated muscle cell development	51/4227	194/17036	0.342112	0.882363	0.827681	mbnl2/dmd/tmod1/gne/lef1/mat2aa/myo18aa/mef2ca/slc8a1a/fkrp/bves/pomgnt2/tmod4/gdf6a/cyp26c1/smyd2a/prox1a/asb2b/tpm3/rbm24a/myh6/gmppb/csrp1a/cavin4b/obscnb/ccdc78/ambra1b/sept15/lgals2a/carm1/flii/scube1/flncb/mybpc1/myf6/myhz2/smyd1a/rbfox2/tomm70a/igfn1.3/igfn1.1/vangl2/ache/mybpc3/tpcn2/nexn/neb/obsl1b/ttn.1/ttn.2/klhl41a	51
GO:0009968	GO:0009968	negative regulation of signal transduction	89/4227	344/17036	0.342653	0.882363	0.827681	rasa3/neurl1aa/jag1a/spred2a/apc/hyou1/rargb/jupa/si:ch211-25d12.7/cby1/bambia/ddit4/jag1b/dact2/nme5/si:ch211-39i2.2/dusp1/prpf19/ids/si:rp71-46j2.7/tnmd/rest/tnfaip1/sik2b/sarm1/nf1a/sox4b/pde11al/phactr4b/gdf6a/rspo3/gpatch3/lgals3b/herpud1/spred3/pid1/mcl1a/grb10a/mylipa/tdp2b/sesn2/nkd3/rnf152/ptch2/chd8/ankrd6b/akap12b/chac1/sox11b/si:ch211-22d5.2/tnfaip8l1/pias4a/wwtr1/ctnnbip1/sulf1/amer2…	89
GO:0031929	GO:0031929	TOR signaling	19/4227	69/17036	0.342821	0.882363	0.827681	tiprl/slc38a9/mlst8/ddit4/sik2b/lamtor1/ros1/sesn2/rnf152/ift57/ift172/si:ch211-22d5.2/tnfaip8l1/rheb/bmt2/si:ch211-147k10.5/lamtor4/si:cabz01029535.1/ift81	19
GO:0061572	GO:0061572	actin filament bundle organization	19/4227	69/17036	0.342821	0.882363	0.827681	baiap2l1a/fmn2b/zgc:158689/spire1a/myoc/limk1b/dpysl3/pfn2/lima1a/limd2/fscn1a/baiap2a/fscn2a/baiap2l1b/add2/aif1l/sdc4/fhod1/rhoab	19
GO:0009117	GO:0009117	nucleotide metabolic process	92/4227	356/17036	0.344099	0.882363	0.827681	gart/atic/mdh1b/dctd/si:dkey-37g12.1/pgam1b/tamm41/park7/pfklb/nme2a/pank2/elovl6l/nt5c1ba/cox5b2/nme5/pnkp/gucy2f/adcy3a/adcy2a/gapdh/gapdhs/eno4/acss1/si:ch211-132f19.7/cmpk2/nt5c1ab/gpib/pkma/nnt2/si:dkey-145c18.3/si:dkey-145c18.2/gmps/adcy2b/rrm2/uck2b/acot11a/prtfdc1/elovl1a/pfkpb/nt5e/adcy1a/enpp1/paics/ppat/cad/si:dkey-206f10.1/uck1/pgam2/nadk2/adssl/rrm1/ampd2a/gpd1b/uckl1b/pfkma/nmnat1/e…	92
GO:0031344	GO:0031344	regulation of cell projection organization	53/4227	202/17036	0.344145	0.882363	0.827681	gpm6ab/musk/dpysl2b/dbnla/cdkl5/cdc42ep1a/cdc42ep4b/fmr1/sema6e/sh3yl1/pak1/sema3d/rgma/ncaldb/sema4ab/pard6gb/col15a1b/sema4e/ezrb/arf6a/nkx6.1/arl3l1/dbn1/dpysl3/si:ch211-129c21.1/pacsin1a/pik3cd/nrp1a/sema5a/lrrc4bb/cdc42ep1b/crb3a/plxnb2a/caprin2/plxnc1/atp6v1f/sema3c/cdc42ep2/si:dkey-40c11.2/ntrk2b/inpp5e/plxna1b/sema5bb/ntn1a/plxnb1b/vax2/si:cabz01029535.1/rbpms2b/zmp:0000001168/mapk14a/eps…	53
GO:0006753	GO:0006753	nucleoside phosphate metabolic process	93/4227	360/17036	0.344561	0.882363	0.827681	gart/atic/mdh1b/dctd/si:dkey-37g12.1/pgam1b/tamm41/park7/pfklb/nme2a/pank2/elovl6l/nt5c1ba/cox5b2/nme5/pnkp/gucy2f/adcy3a/adcy2a/gapdh/gapdhs/eno4/acss1/si:ch211-132f19.7/cmpk2/nt5c1ab/gpib/pkma/nnt2/si:dkey-145c18.3/si:dkey-145c18.2/gmps/adcy2b/rrm2/uck2b/acot11a/prtfdc1/elovl1a/pfkpb/nt5e/adcy1a/enpp1/paics/ppat/cad/si:dkey-206f10.1/uck1/pgam2/nadk2/adssl/rrm1/ampd2a/gpd1b/uckl1b/pfkma/nmnat1/e…	93
GO:0010243	GO:0010243	response to organonitrogen compound	54/4227	206/17036	0.345112	0.882363	0.827681	dnajb14/p2rx3b/junba/slc27a1b/slc38a9/dgat2/tacr1b/rap1ab/agtrap/si:ch211-25d12.7/dnajb12b/dnajb12a/erlec1/syvn1/lamtor1/cyp11c1/foxo3a/khk/pkma/herpud1/pid1/grb10a/sesn2/tmub1/uggt1/sel1l/si:ch73-21k16.1/p2rx4a/sdf2/rnf121/stat1a/cyp11a2/cyp11a1/pkmb/socs1a/shmt1/baiap2l1b/hsp90b1/socs2/lamtor4/hspa5/sdf2l1/anxa1a/derl2/anxa1b/nr4a2b/stat2/os9/shmt2/ache/cpeb1b/stat4/stat1b/glra2	54
GO:0000731	GO:0000731	DNA synthesis involved in DNA repair	4/4227	12/17036	0.345387	0.882363	0.827681	dtl/pold3/poln/rev1	4
GO:0002761	GO:0002761	regulation of myeloid leukocyte differentiation	4/4227	12/17036	0.345387	0.882363	0.827681	tfe3b/myb/spi1a/spi1b	4
GO:0002792	GO:0002792	negative regulation of peptide secretion	4/4227	12/17036	0.345387	0.882363	0.827681	tnfrsf21/anxa1a/anxa1b/lgr4	4
GO:0007129	GO:0007129	synapsis	4/4227	12/17036	0.345387	0.882363	0.827681	hormad1/mei4/syce2/terb2	4
GO:0015701	GO:0015701	bicarbonate transport	4/4227	12/17036	0.345387	0.882363	0.827681	slc4a5/slc4a2b/slc4a1a/slc4a8	4
GO:0016553	GO:0016553	base conversion or substitution editing	4/4227	12/17036	0.345387	0.882363	0.827681	a1cf/adarb2/mettl3/adat3	4
GO:0019217	GO:0019217	regulation of fatty acid metabolic process	4/4227	12/17036	0.345387	0.882363	0.827681	tysnd1/anxa1a/anxa1b/acaa2	4
GO:0019915	GO:0019915	lipid storage	4/4227	12/17036	0.345387	0.882363	0.827681	bscl2l/cidea/mest/pparaa	4
GO:0030431	GO:0030431	sleep	4/4227	12/17036	0.345387	0.882363	0.827681	qrfprb/prokr1b/qrfpra/prok2	4
GO:0032411	GO:0032411	positive regulation of transporter activity	4/4227	12/17036	0.345387	0.882363	0.827681	wnk2/park7/stim1a/wnk1b	4
GO:0032946	GO:0032946	positive regulation of mononuclear cell proliferation	4/4227	12/17036	0.345387	0.882363	0.827681	hhla2b.2/hhla2b.1/anxa1a/anxa1b	4
GO:0042102	GO:0042102	positive regulation of T cell proliferation	4/4227	12/17036	0.345387	0.882363	0.827681	hhla2b.2/hhla2b.1/anxa1a/anxa1b	4
GO:0043618	GO:0043618	regulation of transcription from RNA polymerase II promoter in response to stress	4/4227	12/17036	0.345387	0.882363	0.827681	sirt2/mbtps2/hsf5/ddit3	4
GO:0043620	GO:0043620	regulation of DNA-templated transcription in response to stress	4/4227	12/17036	0.345387	0.882363	0.827681	sirt2/mbtps2/hsf5/ddit3	4
GO:0043650	GO:0043650	dicarboxylic acid biosynthetic process	4/4227	12/17036	0.345387	0.882363	0.827681	mthfd1b/mthfd1l/gls2a/got1l1	4
GO:0048016	GO:0048016	inositol phosphate-mediated signaling	4/4227	12/17036	0.345387	0.882363	0.827681	ppp3cb/nfatc3b/inpp5l/rcan1b	4
GO:0048885	GO:0048885	neuromast deposition	4/4227	12/17036	0.345387	0.882363	0.827681	lef1/prox1a/sulf1/ildr1b	4
GO:0050671	GO:0050671	positive regulation of lymphocyte proliferation	4/4227	12/17036	0.345387	0.882363	0.827681	hhla2b.2/hhla2b.1/anxa1a/anxa1b	4
GO:0060581	GO:0060581	cell fate commitment involved in pattern specification	4/4227	12/17036	0.345387	0.882363	0.827681	fzd8a/foxn4/lhx3/evx2	4
GO:0060997	GO:0060997	dendritic spine morphogenesis	4/4227	12/17036	0.345387	0.882363	0.827681	dbnla/dbn1/caprin2/si:dkey-40c11.2	4
GO:0060999	GO:0060999	positive regulation of dendritic spine development	4/4227	12/17036	0.345387	0.882363	0.827681	dbnla/dbn1/caprin2/si:dkey-40c11.2	4
GO:0070665	GO:0070665	positive regulation of leukocyte proliferation	4/4227	12/17036	0.345387	0.882363	0.827681	hhla2b.2/hhla2b.1/anxa1a/anxa1b	4
GO:0055065	GO:0055065	metal ion homeostasis	73/4227	281/17036	0.345914	0.882363	0.827681	atp1a1a.5/slc24a2/wfs1a/fam155a/si:dkey-28b4.8/pkd2/ryr1a/slc8a1a/slc9a3r1a/letm1/cnnm2a/lpar4/abcb7/pde6a/anxa6/hephl1a/atp1b3b/gpr4/stim1a/gpr55a/atp2c1/ptger2a/trpm7/slc12a1/slc30a4/si:ch211-260p9.3/itpr2/herpud1/bcl2l10/trpc6b/slc39a7/atp1b3a/slc12a7a/agtr1a/ackr4a/opn4.1/slc39a6/scara5/f2rl1.2/f2rl1.1/zgc:171965/atp2a2b/slc8a4a/trpc2b/trpc5b/cp/ccdc115/atp1b2a/trpc1/zgc:56095/ccr10/fth1b/pth…	73
GO:0009145	GO:0009145	purine nucleoside triphosphate biosynthetic process	20/4227	73/17036	0.346138	0.882363	0.827681	pgam1b/pfklb/nme2a/cox5b2/nme5/gapdh/gapdhs/eno4/gpib/pkma/pfkpb/pgam2/pfkma/eno3/pfkpa/pkmb/scn1lab/pfkmb/nme8/pfkla	20
GO:0009206	GO:0009206	purine ribonucleoside triphosphate biosynthetic process	20/4227	73/17036	0.346138	0.882363	0.827681	pgam1b/pfklb/nme2a/cox5b2/nme5/gapdh/gapdhs/eno4/gpib/pkma/pfkpb/pgam2/pfkma/eno3/pfkpa/pkmb/scn1lab/pfkmb/nme8/pfkla	20
GO:0055007	GO:0055007	cardiac muscle cell differentiation	20/4227	73/17036	0.346138	0.882363	0.827681	mat2aa/mef2ca/cyp26c1/asb2b/myh6/sept15/mybpc1/tbx1/dab2/nr2f1a/rbfox2/tomm70a/igfn1.3/igfn1.1/mybpc3/nexn/neb/obsl1b/ttn.1/ttn.2	20
GO:0071526	GO:0071526	semaphorin-plexin signaling pathway	13/4227	46/17036	0.346226	0.882363	0.827681	sema6e/sema3d/sema4ab/sema4e/si:ch211-129c21.1/nrp1a/sema5a/plxnb2a/plxnc1/sema3c/plxna1b/sema5bb/plxnb1b	13
GO:0002793	GO:0002793	positive regulation of peptide secretion	8/4227	27/17036	0.348625	0.884367	0.829561	hmgb1a/tcf7l2/panx1a/hmgb1b/rfx6/scamp5a/ano1/zgc:153759	8
GO:0035088	GO:0035088	establishment or maintenance of apical/basal cell polarity	8/4227	27/17036	0.348625	0.884367	0.829561	dlg2/dlg3/rras/notch1b/atp1b1a/dlg1/epb41l5/ptprbl	8
GO:0046856	GO:0046856	phosphatidylinositol dephosphorylation	8/4227	27/17036	0.348625	0.884367	0.829561	tpte/ptenb/mtmr7a/ptena/mtmr1b/inpp5e/inpp5jb/inpp5l	8
GO:0060900	GO:0060900	embryonic camera-type eye formation	8/4227	27/17036	0.348625	0.884367	0.829561	tdgf1/foxh1/pitx2/sox4b/phactr4b/sox11b/fzd8a/vax2	8
GO:0061245	GO:0061245	establishment or maintenance of bipolar cell polarity	8/4227	27/17036	0.348625	0.884367	0.829561	dlg2/dlg3/rras/notch1b/atp1b1a/dlg1/epb41l5/ptprbl	8
GO:0051094	GO:0051094	positive regulation of developmental process	58/4227	222/17036	0.348682	0.884367	0.829561	lef1/junba/tdgf1/syk/smad2/dbnla/mapk14b/cdkl5/jcada/rest/bace1/si:ch211-276c2.2/csf3r/utp15/elmo1/rbm24a/atraid/kdr/zar1/notch1a/dbn1/serpinf1/stab1/tcf3b/lpar3/pacsin1a/birc5b/hoxc9a/itgb1a/nrp1a/neurod6a/mief1/lgals2a/carm1/ano6/pde3a/vegfab/plxnb2a/caprin2/plxnc1/myf6/gata3/tek/gdnfb/anxa1a/si:dkey-40c11.2/ntrk2b/olfm1a/anxa1b/plxna1b/plxnb1b/brinp3a.1/brinp3a.2/ptger3/fgf3/mapk14a/ntrk2a/dlx…	58
GO:0030155	GO:0030155	regulation of cell adhesion	31/4227	116/17036	0.349844	0.885899	0.830998	tet2/lmo7b/loxl3b/loxl3a/si:ch211-167j9.5/ptk2ab/ptk2ba/si:ch211-241e1.3/ddr2b/emilin2a/lama4/myoc/emilin1a/tnfrsf21/ecm2/si:dkey-32e6.6/hhla2b.2/hhla2b.1/ek1/plxnb2a/plxnc1/gata3/anxa1a/flot2a/anxa1b/plxna1b/plxnb1b/mettl3/emilin2b/si:dkey-6n6.1/zgc:153759	31
GO:0060341	GO:0060341	regulation of cellular localization	31/4227	116/17036	0.349844	0.885899	0.830998	gpc5a/rap1ab/cep131/inpp5f/sar1ab/gpc2/cplx2/si:ch211-210b2.2/rims2a/si:dkey-206p8.1/trpm7/cplx3b/pard6a/mctp2a/gas8/bcl2l10/rims3/pard6gb/si:ch211-13f8.1/anxa13l/hnrnpub/rfx6/napbb/si:dkey-121a11.3/ncbp2/hmgn3/syt12/mief1/fes/mctp2b/ano1	31
GO:0048017	GO:0048017	inositol lipid-mediated signaling	14/4227	50/17036	0.351175	0.887857	0.832834	pik3c2b/nyap2a/si:ch211-260p9.3/pik3c2a/pld1a/kdr/pik3cd/zgc:158659/pik3r6b/tek/ntrk2b/pi4kab/ntrk2a/si:ch211-168k14.2	14
GO:0060491	GO:0060491	regulation of cell projection assembly	14/4227	50/17036	0.351175	0.887857	0.832834	gpm6ab/cdc42ep1a/cdc42ep4b/fmr1/sh3yl1/ezrb/dpysl3/nrp1a/cdc42ep1b/crb3a/atp6v1f/cdc42ep2/inpp5e/eps8l3b	14
GO:0006470	GO:0006470	protein dephosphorylation	45/4227	171/17036	0.35158	0.888174	0.833132	zdhhc8a/ptpn11a/ppm1e/si:ch211-15p9.2/ppm1g/cdkn3/dusp1/ppp2r2ba/ppm1da/ssh2a/pdp1/ptprq/pdp2/dusp22a/arpp19a/ptprua/dusp22b/si:ch1073-184j22.2/ppm1la/cdc14aa/rpap2/ptprfb/dusp12/si:ch211-121a2.2/ppp2r5a/ppp2r5ea/ublcp1/ppp2r2bb/ptprc/ppp4r2a/ptpn11b/si:ch211-149b19.3/ptpro/ptprz1b/mtmr4/dusp19b/si:dkey-1h4.4/cnep1r1/ptpmt1/ptpn5/cdc14b/ptpn1/ptprna/ptpn4a/ppp2r3b	45
GO:0042472	GO:0042472	inner ear morphogenesis	22/4227	81/17036	0.352003	0.888535	0.833471	sox9a/foxj1b/emx2/pax2a/dcdc2b/jag1b/msx1a/sparc/bmper/gas8/slc44a4/chd7/adgrg6/lrrc23/sox10/ttc25/sox9b/gata3/tbx1/ncs1a/tfap2c/fgf3	22
GO:0010721	GO:0010721	negative regulation of cell development	23/4227	85/17036	0.354609	0.893076	0.83773	musk/id1/srgap2/rest/sirt2/sema6e/id2a/sema3d/rgma/sema4ab/sema4e/id2b/notch1a/si:ch211-129c21.1/sema5a/sox10/sema3c/her7/sema5bb/si:cabz01029535.1/her8a/bmp15/dlx1a	23
GO:0051235	GO:0051235	maintenance of location	23/4227	85/17036	0.354609	0.893076	0.83773	pkd2/ryr1a/kdelr2b/zgc:152977/letm1/bscl2l/anxa6/si:ch211-175f11.5/slc30a4/si:ch211-260p9.3/itpr2/bcl2l10/opn4.1/syne1a/spout1/cidea/zgc:56095/fth1b/mest/pparaa/si:dkey-92f12.2/tln2a/itpr3	23
GO:0048732	GO:0048732	gland development	66/4227	254/17036	0.354645	0.893076	0.83773	jag1a/apc/tdgf1/bsx/rargb/tcf7l2/dld/pitx3/supv3l1/pax2a/jag1b/fgfr2/lnx2b/sept6/meis3/ndrg1b/ptger2a/id2a/trpm7/sema3d/mmp23bb/foxa3/ehmt2/gmnn/hey1/ptgs2a/chd7/slc2a2/cnr1/arf6a/notch1a/mapk10/onecut3a/dnmt3bb.2/ppdpfb/itga5/hoxc8a/nrp1a/fads2/rag2/isl2a/cdipt/rarab/thraa/gfer/fscn1a/dnmt1/tbl3/e2f7/gpr22a/pnpla3/nos1/tbx1/xbp1/anxa1a/anxa1b/dzip1/ccdc151/ntn1a/e2f8/snapc2/fgf3/notch2/dnah7/fzd…	66
GO:0031109	GO:0031109	microtubule polymerization or depolymerization	15/4227	54/17036	0.355561	0.894673	0.839228	apc/ska2/ndel1a/eml2/stmn1b/mapre3a/stmn1a/map1sb/stmn4/camsap2a/terf1/cyp11a1/ndel1b/mapre3b/map1aa	15
GO:0071900	GO:0071900	regulation of protein serine/threonine kinase activity	35/4227	132/17036	0.356417	0.895196	0.839719	spred2a/slc27a1b/ccna1/trib3/hexim1/dusp1/ccna2/paqr7b/ccne2/nek10/alk/ccnl1a/spred3/ripk1l/ripk2/ccnl1b/map2k2b/ccnjl/ccny/cdkn1cb/mapk8ip3/smarca4a/pik3r6b/axin1/ccnd2b/irak3/cdkn1ba/taok3a/ccnh/ccnb1/prkag1/prok2/dusp19b/ccnb2/map3k12	35
GO:0060351	GO:0060351	cartilage development involved in endochondral bone morphogenesis	9/4227	31/17036	0.356895	0.895196	0.839719	matn3b/jag1b/anxa6/si:ch211-106n13.3/vwa1/foxd3/col7a1/matn4/notch2	9
GO:1903037	GO:1903037	regulation of leukocyte cell-cell adhesion	9/4227	31/17036	0.356895	0.895196	0.839719	loxl3b/loxl3a/tnfrsf21/hhla2b.2/hhla2b.1/gata3/anxa1a/anxa1b/zgc:153759	9
GO:2001252	GO:2001252	positive regulation of chromosome organization	9/4227	31/17036	0.356895	0.895196	0.839719	meis3/setdb1a/jarid2b/ppp1r7/anapc4/hnrnpub/hmbox1b/tnksb/phf19	9
GO:0030098	GO:0030098	lymphocyte differentiation	16/4227	58/17036	0.359476	0.895344	0.839858	snapc3/loxl3b/loxl3a/ndrg1b/eomesa/chd7/sh3rf1/gemin5/rag2/tbl3/tnpo3/gata3/anxa1a/anxa1b/mettl3/jak3	16
GO:0006417	GO:0006417	regulation of translation	38/4227	144/17036	0.360552	0.895344	0.839858	nanos3/si:dkey-175g6.5/coa3a/eif4ebp3l/ptcd3/fmr1/eif4ea/mettl16/dph1/usp16/trim71/zfp36l1a/ago3b/pabpc1b/lin28a/igf2bp3/ago2/rbm24a/ago4/zfp36l1b/zar1/ncbp2/cpeb2/igf2bp1/caprin2/c1qbp/dph3/nck2b/eif4enif1/tarbp2/cth1/mettl3/ogfod1/cpeb1b/gle1/piwil1/nck2a/upf3a	38
GO:0060047	GO:0060047	heart contraction	38/4227	144/17036	0.360552	0.895344	0.839858	melk/pkd2/junba/grk5/slc8a1a/trpm4b.1/dnd1/scn3b/bves/fbxo32/s100a1/scn1ba/smyd2a/trpm7/hcn4/scn1bb/prrx1a/scn12aa/taf1a/myh6/slc8a4a/hbegfb/tnnc1b/gnb5a/parvb/sept15/hcn4l/kcnh6a/trpm4a/cacna1c/foxn4/rangrf/bin1b/mybpc3/tnni2b.1/atp2a2a/ttn.2/dhrs9	38
GO:0003015	GO:0003015	heart process	39/4227	148/17036	0.361806	0.895344	0.839858	melk/pkd2/junba/grk5/slc8a1a/trpm4b.1/kcnk1b/dnd1/scn3b/bves/fbxo32/s100a1/scn1ba/smyd2a/trpm7/hcn4/scn1bb/prrx1a/scn12aa/taf1a/myh6/slc8a4a/hbegfb/tnnc1b/gnb5a/parvb/sept15/hcn4l/kcnh6a/trpm4a/cacna1c/foxn4/rangrf/bin1b/mybpc3/tnni2b.1/atp2a2a/ttn.2/dhrs9	39
GO:0051186	GO:0051186	cofactor metabolic process	81/4227	314/17036	0.362843	0.895344	0.839858	mdh1b/pgam1b/mat2aa/pfklb/pank2/elovl6l/qdpra/hmbsb/mettl16/gapdh/gapdhs/eno4/acss1/coq6/mthfd1b/gpib/pkma/nnt2/zgc:153031/si:dkey-145c18.3/si:dkey-145c18.2/gstr/iba57/prdx1/acot11a/elovl1a/pfkpb/mmachc/glrx5/prdx6/mthfd1l/chac1/pgam2/nadk2/prdx5/zgc:171566/gpd1b/gss/pfkma/nmnat1/elovl4b/eno3/pfkpa/tmem14ca/coasy/dcakd/cat/pkmb/duox/si:ch73-141c7.1/hmox1a/slc25a39/shmt1/hbba2/hbaa2/acot15/prdx4/c…	81
GO:0006754	GO:0006754	ATP biosynthetic process	17/4227	62/17036	0.362997	0.895344	0.839858	pgam1b/pfklb/cox5b2/gapdh/gapdhs/eno4/gpib/pkma/pfkpb/pgam2/pfkma/eno3/pfkpa/pkmb/scn1lab/pfkmb/pfkla	17
GO:0017148	GO:0017148	negative regulation of translation	17/4227	62/17036	0.362997	0.895344	0.839858	eif4ebp3l/fmr1/mettl16/trim71/zfp36l1a/ago3b/pabpc1b/ago2/rbm24a/ago4/zfp36l1b/zar1/caprin2/eif4enif1/cth1/mettl3/cpeb1b	17
GO:0048916	GO:0048916	posterior lateral line development	17/4227	62/17036	0.362997	0.895344	0.839858	lef1/lpar2b/apc/llgl2/canx/rspo3/insm1a/shroom3/llgl1/cd9b/wnk1b/f11r.1/tmem132e/gnb1b/fgf3/ildr1b/neurod1	17
GO:0003208	GO:0003208	cardiac ventricle morphogenesis	5/4227	16/17036	0.363025	0.895344	0.839858	klf2b/nrg2a/wwtr1/ltbp3/mybpc3	5
GO:0009226	GO:0009226	nucleotide-sugar biosynthetic process	5/4227	16/17036	0.363025	0.895344	0.839858	gnpnat1/zgc:100864/gmppb/pgm3/uap1l1	5
GO:0009409	GO:0009409	response to cold	5/4227	16/17036	0.363025	0.895344	0.839858	slc27a1b/hmgb1a/ucp3/ucp2/hsp90aa1.2	5
GO:0010508	GO:0010508	positive regulation of autophagy	5/4227	16/17036	0.363025	0.895344	0.839858	hmgb1a/tp53inp2/hmgb1b/sesn2/rnf152	5
GO:0019827	GO:0019827	stem cell population maintenance	5/4227	16/17036	0.363025	0.895344	0.839858	nanos3/lin28a/notch1b/mettl3/med14	5
GO:0032957	GO:0032957	inositol trisphosphate metabolic process	5/4227	16/17036	0.363025	0.895344	0.839858	plcd3b/si:ch211-260p9.3/plcd1b/plcd1a/plcd4b	5
GO:0033627	GO:0033627	cell adhesion mediated by integrin	5/4227	16/17036	0.363025	0.895344	0.839858	itgb1a/sdc4/itgb4/itgb5/itgbl1	5
GO:0042573	GO:0042573	retinoic acid metabolic process	5/4227	16/17036	0.363025	0.895344	0.839858	lef1/apc/cyp26c1/rcor1/rdh10b	5
GO:0046174	GO:0046174	polyol catabolic process	5/4227	16/17036	0.363025	0.895344	0.839858	ptenb/ptena/impa2/inpp5jb/inpp5l	5
GO:0046514	GO:0046514	ceramide catabolic process	5/4227	16/17036	0.363025	0.895344	0.839858	gm2a/galcb/galca/neu3.2/gba2	5
GO:0048263	GO:0048263	determination of dorsal identity	5/4227	16/17036	0.363025	0.895344	0.839858	sybu/eomesa/ctnnb2/szl/bmpr1ba	5
GO:0061386	GO:0061386	closure of optic fissure	5/4227	16/17036	0.363025	0.895344	0.839858	pitx2/sox4b/phactr4b/sox11b/vax2	5
GO:0099590	GO:0099590	neurotransmitter receptor internalization	5/4227	16/17036	0.363025	0.895344	0.839858	cacng7a/dnm3a/cacng4b/dnm1a/dnm1b	5
GO:0021575	GO:0021575	hindbrain morphogenesis	10/4227	35/17036	0.363716	0.895344	0.839858	pax2a/exosc3/crabp2a/kcnh1a/rbm7/wdr73/kcnh1b/wnt1/roraa/ptpro	10
GO:0043627	GO:0043627	response to estrogen	10/4227	35/17036	0.363716	0.895344	0.839858	c3a.2/wbp2/esr2b/zgc:66313/lman1/aqp12/ssr4/ssr1/cyp19a1b/hdlbpa	10
GO:0048384	GO:0048384	retinoic acid receptor signaling pathway	10/4227	35/17036	0.363716	0.895344	0.839858	pknox1.2/apc/nr1d4b/rargb/pitx2/crabp2a/rxraa/wwtr1/rarab/zic2a	10
GO:0006520	GO:0006520	cellular amino acid metabolic process	59/4227	227/17036	0.364	0.895351	0.839864	pycr1b/zgc:92040/p4ha1a/aldh18a1/hpdl/oat/qdpra/nars2/si:dkey-40g16.6/ddc/aldh5a1/sdsl/p4ha1b/hmgcl/tdh2/qrsl1/aldh6a1/noxred1/hdc/got2a/gmps/asns/vars2/crtap/glula/cnr1/rars2/cad/pycr3/glulc/p4ha2/gls2b/dbt/pm20d1.2/tph1a/si:ch211-256m1.8/gcat/shmt1/bcat1/prodhb/nos1/dao.2/nos2a/gldc/gad1b/p4htm/shmt2/fah/got2b/enosf1/gls2a/ahcyl1/amt/got1l1/plod1a/ido1/wars2/cps1/phgdh	59
GO:0030516	GO:0030516	regulation of axon extension	18/4227	66/17036	0.366182	0.90002	0.844244	musk/dpysl2b/dbnla/cdkl5/sema6e/sema3d/ncaldb/sema4ab/sema4e/nkx6.1/arl3l1/dbn1/si:ch211-129c21.1/sema5a/sema3c/si:dkey-40c11.2/sema5bb/ntn1a	18
GO:0140014	GO:0140014	mitotic nuclear division	29/4227	109/17036	0.366949	0.901209	0.845359	ncapd3/map9/bora/ewsr1a/pmaip1/ndel1a/pdcd2/mad2l1bp/fbxo5/si:ch1073-266p11.2/aurkb/usp16/dscc1/wnt4b/gnl2/kif23/mcl1a/cdca8/cdc14aa/ppp1r7/anapc4/hnrnpub/birc5b/smc1a/ndel1b/ccnb1/aurka/cdt1/cdc14b	29
GO:0006935	GO:0006935	chemotaxis	97/4227	378/17036	0.368842	0.903172	0.847201	crmp1/unc5c/apc/tdgf1/musk/dpysl2b/robo3/hmgb1a/mmp13a/pcdh17/rac1a/dpysl4/rest/ncam1b/alcamb/hmgb1b/ccr11.1/enpp2/tnfrsf1a/si:dkey-92i15.4/sema6e/gdf6a/ptk2ba/lgals3b/dpysl5a/hdc/nptnb/sema3d/vaspb/hnrnpr/ncaldb/top2b/sema4ab/yrk/csf3b/si:ch211-241e1.3/ephb3a/usp33/ptprfb/col15a1b/ackr4a/ptch2/tnr/sema4e/fzd3a/unc5da/rb1/nrxn2a/arl3l1/dpysl3/si:ch211-129c21.1/slit1b/ephb2a/nrp1a/sema5a/cul1b/ek1…	97
GO:0006022	GO:0006022	aminoglycan metabolic process	19/4227	70/17036	0.369078	0.903172	0.847201	si:dkey-26i13.5/chst12b/b3galt6/itih3a/itih1/chst3b/chst3a/si:ch211-286b4.4/ext1a/b3gnt2b/has3/ext1b/extl2/b3gnt7/chia.4/xylt1/itih5/chst7/glceb	19
GO:0030917	GO:0030917	midbrain-hindbrain boundary development	11/4227	39/17036	0.369454	0.903172	0.847201	apc/pax2a/nin/wls/rnf152/en2b/pou5f3/wnt10b/wnt1/rarab/slc7a6os	11
GO:0051054	GO:0051054	positive regulation of DNA metabolic process	11/4227	39/17036	0.369454	0.903172	0.847201	dbf4b/ercc2/dbf4/fam168a/setdb1a/spire1a/hmbox1b/e2f7/tnksb/e2f8/ercc8	11
GO:0060113	GO:0060113	inner ear receptor cell differentiation	11/4227	39/17036	0.369454	0.903172	0.847201	dla/foxj1b/camk2g1/emx2/pax2a/jag1b/myo7aa/crb3a/tmem132e/fgf3/neurod1	11
GO:0071241	GO:0071241	cellular response to inorganic substance	11/4227	39/17036	0.369454	0.903172	0.847201	pkd2/hvcn1/cpne4a/cpne2/syt12/syt9b/cpne8/rasa4/sumo1/syt13/cpne7	11
GO:0007178	GO:0007178	transmembrane receptor protein serine/threonine kinase signaling pathway	48/4227	184/17036	0.370972	0.906074	0.849922	tdgf1/smad2/smad9/rargb/ppp4cb/foxh1/bambia/osr1/dact2/ids/gdf9/si:rp71-46j2.7/bmper/gdf6a/gdf3/smad6b/rgma/dusp22a/tgfbr2a/si:dkey-222b8.1/tdp2b/dusp22b/ppm1la/inhbab/tgfb1b/wwtr1/acvr1ba/tgfbr1b/skilb/zmynd11/szl/tob1a/fscn1a/smurf1/scube1/lemd3/mtmr4/pxna/bmpr1ba/dab2/rgmb/dzip1/bmpr2a/gdf5/skor1a/smad3a/bmp15/inhbb	48
GO:0030902	GO:0030902	hindbrain development	33/4227	125/17036	0.372973	0.906074	0.849922	arl13b/znf503/pax2a/rest/exosc3/meis3/crabp2a/cyp26c1/kcnh1a/mdga2a/sema3d/rbm7/bmi1b/rnf152/brf1b/fzd3a/pou5f3/wdr73/kcnh1b/wnt1/zic4/pax6a/roraa/ptpro/gas2l3/prickle1b/znhit3/notch1b/vangl2/fgf3/efnb2a/epb41l5/zic2a	33
GO:0002285	GO:0002285	lymphocyte activation involved in immune response	6/4227	20/17036	0.375202	0.906074	0.849922	loxl3b/cd74a/loxl3a/eomesa/anxa1a/anxa1b	6
GO:0003413	GO:0003413	chondrocyte differentiation involved in endochondral bone morphogenesis	6/4227	20/17036	0.375202	0.906074	0.849922	matn3b/anxa6/si:ch211-106n13.3/vwa1/col7a1/matn4	6
GO:0003418	GO:0003418	growth plate cartilage chondrocyte differentiation	6/4227	20/17036	0.375202	0.906074	0.849922	matn3b/anxa6/si:ch211-106n13.3/vwa1/col7a1/matn4	6
GO:0006305	GO:0006305	DNA alkylation	6/4227	20/17036	0.375202	0.906074	0.849922	apc/dnmt3ab/pou5f3/dnmt3bb.2/dnmt3bb.1/dnmt1	6
GO:0006306	GO:0006306	DNA methylation	6/4227	20/17036	0.375202	0.906074	0.849922	apc/dnmt3ab/pou5f3/dnmt3bb.2/dnmt3bb.1/dnmt1	6
GO:0006783	GO:0006783	heme biosynthetic process	6/4227	20/17036	0.375202	0.906074	0.849922	hmbsb/iba57/tmem14ca/slc25a39/alad/cpox	6
GO:0006829	GO:0006829	zinc ion transport	6/4227	20/17036	0.375202	0.906074	0.849922	slc39a11/slc30a4/slc39a7/slc39a6/slc39a13/slc39a3	6
GO:0014029	GO:0014029	neural crest formation	6/4227	20/17036	0.375202	0.906074	0.849922	fmr1/bmper/chd7/kctd15a/parp3/tfap2c	6
GO:0030322	GO:0030322	stabilization of membrane potential	6/4227	20/17036	0.375202	0.906074	0.849922	kcnk1b/si:ch211-261a10.5/kcnk10b/kcnk6/kcnk2b/kcnk5b	6
GO:0030574	GO:0030574	collagen catabolic process	6/4227	20/17036	0.375202	0.906074	0.849922	mmp13a/mmp28/mmp23bb/mmp11b/mmp15a/mmp24	6
GO:0038034	GO:0038034	signal transduction in absence of ligand	6/4227	20/17036	0.375202	0.906074	0.849922	bcl2l10/mcl1a/bokb/baxb/boka/bcl2l16	6
GO:0045927	GO:0045927	positive regulation of growth	6/4227	20/17036	0.375202	0.906074	0.849922	dbnla/cdkl5/supv3l1/slc44a4/dbn1/si:dkey-40c11.2	6
GO:0097192	GO:0097192	extrinsic apoptotic signaling pathway in absence of ligand	6/4227	20/17036	0.375202	0.906074	0.849922	bcl2l10/mcl1a/bokb/baxb/boka/bcl2l16	6
GO:1990798	GO:1990798	pancreas regeneration	6/4227	20/17036	0.375202	0.906074	0.849922	glis3/ide/pepd/c2cd4a/klhl42/notch2	6
GO:0042471	GO:0042471	ear morphogenesis	22/4227	82/17036	0.376386	0.908242	0.851957	sox9a/foxj1b/emx2/pax2a/dcdc2b/jag1b/msx1a/sparc/bmper/gas8/slc44a4/chd7/adgrg6/lrrc23/sox10/ttc25/sox9b/gata3/tbx1/ncs1a/tfap2c/fgf3	22
GO:0046173	GO:0046173	polyol biosynthetic process	13/4227	47/17036	0.378604	0.912901	0.856327	ipmkb/plcd3b/pgp/qdpra/si:ch211-260p9.3/plcd1b/itpkb/itpkca/ippk/impa2/plcd1a/spra/plcd4b	13
GO:0016042	GO:0016042	lipid catabolic process	41/4227	157/17036	0.381825	0.918057	0.861163	slc27a4/smpd1/acads/plce1/plcd3b/tysnd1/acoxl/gm2a/bco2b/enpp2/galcb/hadhab/si:ch211-260p9.3/acadl/plcd1b/pld1a/acadm/oc90/galca/cyp46a1.2/echdc2/si:ch73-21k16.1/hadhaa/smpd4/neu3.2/lipia/plcd1a/abhd2b/gdpd3a/eci1/pdxdc1/zgc:92162/phyh/pnpla3/acox1/gba2/acox3/acaa2/cpt2/lipg/plcd4b	41
GO:0002064	GO:0002064	epithelial cell development	25/4227	94/17036	0.382146	0.918057	0.861163	glis3/foxj1b/meis1b/jag1b/ide/npas4l/tnmd/kirrel3l/ptk2ab/kdf1a/marcksb/thsd7aa/lama4/tnfrsf21/shroom3/fbn2b/wwtr1/slc2a1a/itga5/c2cd4a/kank2/f11r.1/tmem132e/myh9a/bmp15	25
GO:1902904	GO:1902904	negative regulation of supramolecular fiber organization	14/4227	51/17036	0.382321	0.918057	0.861163	tmod1/apc/eml2/tmod4/si:ch211-175f11.5/sptb/camsap2a/twf1a/kank2/add2/kank1b/kank1a/gsnb/kank3	14
GO:0048585	GO:0048585	negative regulation of response to stimulus	107/4227	419/17036	0.382522	0.918057	0.861163	pros1/rasa3/neurl1aa/jag1a/spred2a/apc/hyou1/rargb/jupa/si:ch211-25d12.7/cby1/bambia/ddit4/loxl3b/jag1b/dact2/loxl3a/nme5/si:ch211-39i2.2/dusp1/prpf19/ids/si:rp71-46j2.7/tnmd/rest/rnf169/tnfaip1/sik2b/sarm1/nf1a/sox4b/pde11al/sema6e/phactr4b/gdf6a/rspo3/gpatch3/lgals3b/sema3d/herpud1/rgma/spred3/pid1/mcl1a/grb10a/sema4ab/mylipa/tdp2b/sesn2/nkd3/rnf152/ptch2/chd8/sema4e/ankrd6b/akap12b/chac1/sox11…	107
GO:0001878	GO:0001878	response to yeast	7/4227	24/17036	0.384209	0.918057	0.861163	nsdhl/cyp51/ccny/cyb5r2/hspa5/zgc:77112/slc15a2	7
GO:0003231	GO:0003231	cardiac ventricle development	7/4227	24/17036	0.384209	0.918057	0.861163	tmem87b/klf2b/fntb/nrg2a/wwtr1/ltbp3/mybpc3	7
GO:0022600	GO:0022600	digestive system process	7/4227	24/17036	0.384209	0.918057	0.861163	tcf7l2/chd7/si:ch73-151m17.5/cav1/cdipt/f11r.1/ptger3	7
GO:0042181	GO:0042181	ketone biosynthetic process	7/4227	24/17036	0.384209	0.918057	0.861163	coq6/cyp11a2/si:ch73-141c7.1/coq5/fdx1b/coq4/coq10b	7
GO:0045931	GO:0045931	positive regulation of mitotic cell cycle	7/4227	24/17036	0.384209	0.918057	0.861163	pmaip1/ppp1r7/anapc4/hnrnpub/ccnd2b/anxa1a/anxa1b	7
GO:0050807	GO:0050807	regulation of synapse organization	7/4227	24/17036	0.384209	0.918057	0.861163	dbnla/neurod2/fmr1/si:ch211-276c2.2/dbn1/caprin2/si:dkey-40c11.2	7
GO:0061311	GO:0061311	cell surface receptor signaling pathway involved in heart development	7/4227	24/17036	0.384209	0.918057	0.861163	apc/jupa/foxh1/ids/notch1a/dub/dzip1	7
GO:0061512	GO:0061512	protein localization to cilium	7/4227	24/17036	0.384209	0.918057	0.861163	arl13b/arl6/lhfpl5a/myo7aa/gas8/snx10a/ttc26	7
GO:0045214	GO:0045214	sarcomere organization	16/4227	59/17036	0.388529	0.927681	0.870191	dmd/slc8a1a/smyd2a/rbm24a/csrp1a/flii/flncb/mybpc1/smyd1a/igfn1.3/igfn1.1/mybpc3/obsl1b/ttn.1/ttn.2/klhl41a	16
GO:0098656	GO:0098656	anion transmembrane transport	30/4227	114/17036	0.389444	0.929141	0.87156	slc25a1b/slc38a9/slc25a1a/slc38a6/slc7a3b/slc7a11/slc12a1/si:dkeyp-120h9.1/lrrc8da/slc12a7a/gabrg2/ankha/best1/slc7a10b/slc25a38a/slc35b1/ano6/lrrc8ab/si:zfos-323e3.4/lrrc8c/slc32a1/slc12a10.2/slc12a10.3/slc7a9/slc38a7/ano1/slc12a8/slc38a11/glra2/zgc:165507	30
GO:0010959	GO:0010959	regulation of metal ion transport	17/4227	63/17036	0.39115	0.929141	0.87156	rem1/wnk2/vip/scn3b/stim1a/scn1ba/fxyd1/lgals3b/neto2b/bcl2l10/scn1bb/cldnb/nkain4/cacnb1/wnk1b/gpr161/cacnb4a	17
GO:0016125	GO:0016125	sterol metabolic process	17/4227	63/17036	0.39115	0.929141	0.87156	msmo1/tm7sf2/nsdhl/cyp11c1/cyp26c1/npc2/cyp51/arv1/cyp46a1.2/ch25hl2/faxdc2/cyb5r2/cyp11a2/cyp11a1/mvk/hsd17b7/star	17
GO:0070121	GO:0070121	Kupffer's vesicle development	17/4227	63/17036	0.39115	0.929141	0.87156	arl6/pkd2/wdr18/prickle2b/llgl2/cep131/enpp2/snx10a/gmnn/nkd3/unc119b/lpar3/dnmt1/gpr22a/atp6v1f/ccdc151/fgf4	17
GO:0006900	GO:0006900	vesicle budding from membrane	8/4227	28/17036	0.391186	0.929141	0.87156	si:dkey-27b3.2/picalma/sar1ab/picalmb/dnm3a/arfgap3/dnm1a/dnm1b	8
GO:0007131	GO:0007131	reciprocal meiotic recombination	8/4227	28/17036	0.391186	0.929141	0.87156	meiob/ercc4/eme1/msh5/msh4/top2b/hfm1/rmi1	8
GO:0031103	GO:0031103	axon regeneration	8/4227	28/17036	0.391186	0.929141	0.87156	dpysl2b/hmgb1a/ptena/rgma/b3gat1a/lingo1a/cnp/lrp4	8
GO:0006368	GO:0006368	transcription elongation from RNA polymerase II promoter	9/4227	32/17036	0.396775	0.941008	0.882692	pcid2/eny2/elp2/ell2/ell/wdr61/brd4/pbrm1l/gtf2f2b	9
GO:0048484	GO:0048484	enteric nervous system development	9/4227	32/17036	0.396775	0.941008	0.882692	phox2bb/meis3/phactr4b/sema3d/chd8/mapk10/sox10/sema3c/foxd3	9
GO:0060560	GO:0060560	developmental growth involved in morphogenesis	42/4227	162/17036	0.400334	0.945646	0.887042	ptpn11a/musk/dpysl2b/robo3/dbnla/cdkl5/pcdh17/sema6e/clns1a/sema3d/hnrnpr/ncaldb/sema4ab/pard6gb/thsd7aa/ap1g2/sema4e/katna1/akap12b/nkx6.1/arl3l1/dbn1/tmem59l/si:ch211-129c21.1/pik3cd/itga5/nrp1a/sema5a/isl2a/glis2b/dcn/sema3c/nos1/si:dkey-40c11.2/sema5bb/ntn1a/plxnb1b/vangl2/col4a6/col4a5/mapk14a/eaf2	42
GO:0007051	GO:0007051	spindle organization	22/4227	83/17036	0.401034	0.945646	0.887042	map9/bora/apc/ewsr1a/si:ch1073-266p11.2/aurkb/rgs14a/ccdc69/mapre3a/kiz/kif23/cep126/hnrnpub/efhc1/sass6/si:zfos-452g4.1/birc5b/mapre3b/tnksb/ntmt1/aurka/haus6	22
GO:0021536	GO:0021536	diencephalon development	22/4227	83/17036	0.401034	0.945646	0.887042	lef1/dla/tdgf1/bsx/foxh1/tcf7l2/pitx3/pitx2/pcdh10b/hey1/wls/notch1a/otpa/csrnp1b/pax6a/nsfa/dzip1/etv5b/sox14/sec61a1/fgf3/zic2a	22
GO:0051875	GO:0051875	pigment granule localization	10/4227	36/17036	0.401365	0.945646	0.887042	arl6/prickle2b/cep131/kcnj13/rab11al/zgc:91968/rab27b/ippk/nsfa/inpp5e	10
GO:0035051	GO:0035051	cardiocyte differentiation	24/4227	91/17036	0.403939	0.945646	0.887042	mat2aa/mef2ca/npas4l/cyp26c1/asb2b/sema3d/ptch2/myh6/fbn2b/sept15/mybpc1/tbx1/dab2/nr2f1a/rbfox2/tomm70a/igfn1.3/igfn1.1/mybpc3/nexn/neb/obsl1b/ttn.1/ttn.2	24
GO:0003333	GO:0003333	amino acid transmembrane transport	11/4227	40/17036	0.405209	0.945646	0.887042	slc38a9/slc38a6/slc7a3b/slc7a11/si:dkeyp-120h9.1/slc7a10b/slc25a38a/slc32a1/slc7a9/slc38a7/slc38a11	11
GO:0043112	GO:0043112	receptor metabolic process	11/4227	40/17036	0.405209	0.945646	0.887042	lamtor1/bves/prkcg/cacng7a/si:ch73-111k22.3/dnm3a/fscn1a/cacng4b/dnm1a/znrf3/dnm1b	11
GO:0046839	GO:0046839	phospholipid dephosphorylation	11/4227	40/17036	0.405209	0.945646	0.887042	plppr1/plpp5/tpte/ptenb/mtmr7a/ptena/mtmr1b/plpp2b/inpp5e/inpp5jb/inpp5l	11
GO:0051187	GO:0051187	cofactor catabolic process	11/4227	40/17036	0.405209	0.945646	0.887042	prdx1/prdx6/chac1/prdx5/cat/hmox1a/hbba2/hbaa2/prdx4/nudt12/ggt1a	11
GO:0071897	GO:0071897	DNA biosynthetic process	11/4227	40/17036	0.405209	0.945646	0.887042	lig4/dtl/hnrnpub/hmbox1b/pold3/nhp2/terf1/tnksb/nop10/poln/rev1	11
GO:0051321	GO:0051321	meiotic cell cycle	27/4227	103/17036	0.40755	0.945646	0.887042	ncapd3/meiob/ercc4/eme1/fbxo5/tex11/zgc:195212/msh5/hormad1/fbxo43/msh4/pdik1l/top2b/rad21b/hfm1/mei4/birc5b/rec8b/sycp3/syce2/aurka/mettl3/terb2/m1ap/piwil1/rad21l1/rmi1	27
GO:0021954	GO:0021954	central nervous system neuron development	12/4227	44/17036	0.40848	0.945646	0.887042	ewsr1a/lhx6/auts2a/prox1a/lhx8a/otpa/ncam1a/ephb2a/ppp4ca/nsfa/nr4a2b/ntn1a	12
GO:0001959	GO:0001959	regulation of cytokine-mediated signaling pathway	4/4227	13/17036	0.409443	0.945646	0.887042	pias4a/cav1/socs1a/mettl3	4
GO:0006525	GO:0006525	arginine metabolic process	4/4227	13/17036	0.409443	0.945646	0.887042	oat/nos1/nos2a/cps1	4
GO:0007080	GO:0007080	mitotic metaphase plate congression	4/4227	13/17036	0.409443	0.945646	0.887042	hnrnpub/birc5b/ccnb1/cdt1	4
GO:0007413	GO:0007413	axonal fasciculation	4/4227	13/17036	0.409443	0.945646	0.887042	sema3d/cnr1/nrp1a/ek1	4
GO:0009081	GO:0009081	branched-chain amino acid metabolic process	4/4227	13/17036	0.409443	0.945646	0.887042	hmgcl/aldh6a1/dbt/bcat1	4
GO:0010043	GO:0010043	response to zinc ion	4/4227	13/17036	0.409443	0.945646	0.887042	hvcn1/khk/slc30a4/slc39a3	4
GO:0021511	GO:0021511	spinal cord patterning	4/4227	13/17036	0.409443	0.945646	0.887042	sulf1/foxn4/lhx3/evx2	4
GO:0034453	GO:0034453	microtubule anchoring	4/4227	13/17036	0.409443	0.945646	0.887042	nin/cep19/saxo2/zgc:162200	4
GO:0042670	GO:0042670	retinal cone cell differentiation	4/4227	13/17036	0.409443	0.945646	0.887042	gdf6a/insm1a/pax6a/six7	4
GO:0048246	GO:0048246	macrophage chemotaxis	4/4227	13/17036	0.409443	0.945646	0.887042	mmp13a/lgals3b/yrk/duox	4
GO:0060147	GO:0060147	regulation of posttranscriptional gene silencing	4/4227	13/17036	0.409443	0.945646	0.887042	dnd1/trim71/tarbp2/ajuba	4
GO:0060759	GO:0060759	regulation of response to cytokine stimulus	4/4227	13/17036	0.409443	0.945646	0.887042	pias4a/cav1/socs1a/mettl3	4
GO:0060964	GO:0060964	regulation of gene silencing by miRNA	4/4227	13/17036	0.409443	0.945646	0.887042	dnd1/trim71/tarbp2/ajuba	4
GO:0060966	GO:0060966	regulation of gene silencing by RNA	4/4227	13/17036	0.409443	0.945646	0.887042	dnd1/trim71/tarbp2/ajuba	4
GO:0070593	GO:0070593	dendrite self-avoidance	4/4227	13/17036	0.409443	0.945646	0.887042	robo3/nptnb/nptna/nexn	4
GO:0071907	GO:0071907	determination of digestive tract left/right asymmetry	4/4227	13/17036	0.409443	0.945646	0.887042	rargb/sept6/pitx2/gpr22a	4
GO:0097061	GO:0097061	dendritic spine organization	4/4227	13/17036	0.409443	0.945646	0.887042	dbnla/dbn1/caprin2/si:dkey-40c11.2	4
GO:0097178	GO:0097178	ruffle assembly	4/4227	13/17036	0.409443	0.945646	0.887042	dbnla/sh3yl1/aif1l/eps8l3b	4
GO:0097320	GO:0097320	plasma membrane tubulation	4/4227	13/17036	0.409443	0.945646	0.887042	pacsin1a/plekhm2/bin2a/bin2b	4
GO:0106030	GO:0106030	neuron projection fasciculation	4/4227	13/17036	0.409443	0.945646	0.887042	sema3d/cnr1/nrp1a/ek1	4
GO:1901654	GO:1901654	response to ketone	4/4227	13/17036	0.409443	0.945646	0.887042	park7/sult2st3/ptger2a/abhd2b	4
GO:1902285	GO:1902285	semaphorin-plexin signaling pathway involved in neuron projection guidance	4/4227	13/17036	0.409443	0.945646	0.887042	plxnb2a/plxnc1/plxna1b/plxnb1b	4
GO:1902287	GO:1902287	semaphorin-plexin signaling pathway involved in axon guidance	4/4227	13/17036	0.409443	0.945646	0.887042	plxnb2a/plxnc1/plxna1b/plxnb1b	4
GO:2000242	GO:2000242	negative regulation of reproductive process	4/4227	13/17036	0.409443	0.945646	0.887042	fbxo5/hormad1/fbxo43/bmp15	4
GO:0007043	GO:0007043	cell-cell junction assembly	13/4227	48/17036	0.411298	0.948103	0.889347	arvcfa/oclna/jupa/bves/zgc:154006/cdh6/cdh18a/ctnnd2b/dsg2.1/cntnap1/si:ch211-198m17.1/pkp2/cdh1	13
GO:0044057	GO:0044057	regulation of system process	34/4227	131/17036	0.41361	0.948103	0.889347	melk/pkd2/grk5/slc8a1a/trpm4b.1/vip/eif4ebp3l/anxa6/bace1/scn3b/s100a1/scn1ba/trpm7/hcn4/scn1bb/prrx1a/agtr1a/scn12aa/tnfrsf21/amh/avpr2ab/tnnc1b/parvb/hcn4l/atp2a1/emp2/kcnh6a/trpm4a/cacna1c/foxn4/vcana/ptger3/mybpc3/atp2a2a	34
GO:0015914	GO:0015914	phospholipid transport	14/4227	52/17036	0.413753	0.948103	0.889347	atp11a/stard7/pitpnab/mfsd2aa/abca1b/atp10b/stard14/pitpnaa/atp8b2/atp8b3/prelid1b/osbpl5/atp8b4/prelid3b	14
GO:0050954	GO:0050954	sensory perception of mechanical stimulus	14/4227	52/17036	0.413753	0.948103	0.889347	myo15ab/lhfpl5a/ush1gb/dcdc2b/clrn1/myo7aa/trpn1/col11a2/trpa1a/trpa1b/ush1ga/tmc1/tmem132e/tecta	14
GO:0043087	GO:0043087	regulation of GTPase activity	37/4227	143/17036	0.415517	0.948103	0.889347	rasa3/ect2/arhgap27/nf1a/si:dkey-238d18.4/bves/syngap1b/asap3/tbc1d15/syngap1a/adcyap1b/asap1a/rasal2/myo9b/asap2b/bcr/elmod1/ek1/si:ch211-266k8.4/tbc1d2b/tbc1d16/arhgap27l/adap2/plxnb2a/plxnc1/ccl19a.1/rasa1a/rasa4/plxna1b/rasal3/plxnb1b/evi5b/iqgap1/zmp:0000001168/gapvd1/chn1/grtp1b	37
GO:0001570	GO:0001570	vasculogenesis	15/4227	56/17036	0.415911	0.948103	0.889347	npas4l/fkrp/fli1b/wdr43/fbn2b/ell/wwtr1/birc5b/hoxc9a/nrp1a/trpc1/sulf1/cald1b/hoxd4a/stat4	15
GO:0051494	GO:0051494	negative regulation of cytoskeleton organization	15/4227	56/17036	0.415911	0.948103	0.889347	tmod1/apc/eml2/tmod4/si:ch211-175f11.5/sptb/camsap2a/twf1a/kank2/mdm1/add2/kank1b/kank1a/gsnb/kank3	15
GO:0034248	GO:0034248	regulation of cellular amide metabolic process	38/4227	147/17036	0.416085	0.948103	0.889347	nanos3/si:dkey-175g6.5/coa3a/eif4ebp3l/ptcd3/fmr1/eif4ea/mettl16/dph1/usp16/trim71/zfp36l1a/ago3b/pabpc1b/lin28a/igf2bp3/ago2/rbm24a/ago4/zfp36l1b/zar1/ncbp2/cpeb2/igf2bp1/caprin2/c1qbp/dph3/nck2b/eif4enif1/tarbp2/cth1/mettl3/ogfod1/cpeb1b/gle1/piwil1/nck2a/upf3a	38
GO:0031016	GO:0031016	pancreas development	41/4227	159/17036	0.417615	0.948103	0.889347	rfx3/glis3/apc/rargb/tcf7l2/dld/jag1b/ide/fgfr2/lnx2b/sept6/meis3/lsr/sox4b/ptger2a/trpm7/pepd/ehmt2/gmnn/ptgs2a/rfx6/insm1a/notch1a/nkx6.1/dnmt3bb.2/ppdpfb/hoxc8a/sept15/isl2a/c2cd4a/fscn1a/dnmt1/sox9b/klhl42/anxa1a/anxa1b/ccdc151/notch2/eaf2/neurod1/dhrs9	41
GO:1901607	GO:1901607	alpha-amino acid biosynthetic process	16/4227	60/17036	0.417822	0.948103	0.889347	pycr1b/aldh18a1/noxred1/asns/glula/cad/pycr3/glulc/shmt1/bcat1/shmt2/gls2a/got1l1/plod1a/cps1/phgdh	16
GO:0006743	GO:0006743	ubiquinone metabolic process	5/4227	17/17036	0.418919	0.948103	0.889347	coq6/si:ch73-141c7.1/coq5/coq4/coq10b	5
GO:0006744	GO:0006744	ubiquinone biosynthetic process	5/4227	17/17036	0.418919	0.948103	0.889347	coq6/si:ch73-141c7.1/coq5/coq4/coq10b	5
GO:0021554	GO:0021554	optic nerve development	5/4227	17/17036	0.418919	0.948103	0.889347	six3b/rb1/tuba1a/smarca4a/vax2	5
GO:0030878	GO:0030878	thyroid gland development	5/4227	17/17036	0.418919	0.948103	0.889347	jag1a/pax2a/jag1b/thraa/ntn1a	5
GO:0034764	GO:0034764	positive regulation of transmembrane transport	5/4227	17/17036	0.418919	0.948103	0.889347	wnk2/park7/stim1a/ano6/wnk1b	5
GO:0035622	GO:0035622	intrahepatic bile duct development	5/4227	17/17036	0.418919	0.948103	0.889347	rargb/jag1b/arf6a/dnmt1/snapc2	5
GO:0043506	GO:0043506	regulation of JUN kinase activity	5/4227	17/17036	0.418919	0.948103	0.889347	ripk1l/ripk2/mapk8ip3/axin1/map3k12	5
GO:0051092	GO:0051092	positive regulation of NF-kappaB transcription factor activity	5/4227	17/17036	0.418919	0.948103	0.889347	bcl10/terf2ip/traf5/irak3/ikbkb	5
GO:0055064	GO:0055064	chloride ion homeostasis	5/4227	17/17036	0.418919	0.948103	0.889347	slc12a1/slc12a7a/slc12a10.2/slc12a10.3/slc12a8	5
GO:0072102	GO:0072102	glomerulus morphogenesis	5/4227	17/17036	0.418919	0.948103	0.889347	tdgf1/pax2a/osr1/vcana/myh9a	5
GO:0106027	GO:0106027	neuron projection organization	5/4227	17/17036	0.418919	0.948103	0.889347	dbnla/emx2/dbn1/caprin2/si:dkey-40c11.2	5
GO:1901661	GO:1901661	quinone metabolic process	5/4227	17/17036	0.418919	0.948103	0.889347	coq6/si:ch73-141c7.1/coq5/coq4/coq10b	5
GO:1901663	GO:1901663	quinone biosynthetic process	5/4227	17/17036	0.418919	0.948103	0.889347	coq6/si:ch73-141c7.1/coq5/coq4/coq10b	5
GO:1901992	GO:1901992	positive regulation of mitotic cell cycle phase transition	5/4227	17/17036	0.418919	0.948103	0.889347	ppp1r7/anapc4/ccnd2b/anxa1a/anxa1b	5
GO:0008652	GO:0008652	cellular amino acid biosynthetic process	17/4227	64/17036	0.419526	0.948103	0.889347	pycr1b/aldh18a1/noxred1/asns/glula/cad/pycr3/glulc/shmt1/bcat1/gad1b/shmt2/gls2a/got1l1/plod1a/cps1/phgdh	17
GO:0018108	GO:0018108	peptidyl-tyrosine phosphorylation	17/4227	64/17036	0.419526	0.948103	0.889347	si:ch211-167j9.5/ptk2ab/sh3bp5b/si:ch73-340m8.2/ptk2ba/sh3bp5lb/yrk/tnk2b/yes1/unc119b/ptprc/tec/socs1a/osmr/fes/tnk1/zgc:153759	17
GO:0045665	GO:0045665	negative regulation of neuron differentiation	17/4227	64/17036	0.419526	0.948103	0.889347	musk/id1/rest/sema6e/id2a/sema3d/rgma/sema4ab/sema4e/id2b/si:ch211-129c21.1/sema5a/sema3c/her7/sema5bb/si:cabz01029535.1/dlx1a	17
GO:1901615	GO:1901615	organic hydroxy compound metabolic process	51/4227	199/17036	0.421314	0.948103	0.889347	slc5a3a/msmo1/tm7sf2/dgat2/comtb/park7/ipmkb/plcd3b/ptenb/pgp/nsdhl/qdpra/cyp11c1/cyp26c1/ptena/npc2/trpm7/slc24a5/si:ch211-260p9.3/cyp51/plcd1b/ttpa/rdh10b/arv1/cyp46a1.2/itpkb/nus1/ch25hl2/rnf180/itpkca/faxdc2/ippk/impa2/plcd1a/tph1a/cyb5r2/cyp11a2/cyp11a1/zgc:101540/mvk/fdx1b/inpp5jb/spra/hsd17b7/fah/cyp2r1/slc5a5/inpp5l/star/plcd4b/dhrs9	51
GO:0019751	GO:0019751	polyol metabolic process	19/4227	72/17036	0.422431	0.948103	0.889347	slc5a3a/dgat2/ipmkb/plcd3b/ptenb/pgp/qdpra/ptena/si:ch211-260p9.3/plcd1b/itpkb/itpkca/ippk/impa2/plcd1a/inpp5jb/spra/inpp5l/plcd4b	19
GO:1903046	GO:1903046	meiotic cell cycle process	19/4227	72/17036	0.422431	0.948103	0.889347	ncapd3/meiob/ercc4/eme1/fbxo5/zgc:195212/msh5/hormad1/fbxo43/msh4/top2b/hfm1/mei4/birc5b/syce2/aurka/terb2/m1ap/rmi1	19
GO:0071363	GO:0071363	cellular response to growth factor stimulus	66/4227	259/17036	0.42441	0.948103	0.889347	tdgf1/smad2/smad9/fgfr1b/rargb/ppp4cb/foxh1/bambia/fgfr3/fgfr2/ids/gdf9/si:rp71-46j2.7/tnmd/bmper/trim71/gdf6a/gdf3/fgf7/smad6b/rgma/dusp22a/si:dkey-222b8.1/tdp2b/dusp22b/kdr/cad/ccbe1/tgfb1b/wwtr1/ngfa/acvr1ba/sall4/tgfbr1b/nrp1a/sulf1/skilb/zmynd11/szl/tob1a/smurf1/ptpro/fgf6b/vegfab/scube1/lemd3/gata3/mtmr4/pxna/bmpr1ba/anxa1a/dab2/rgmb/ntrk2b/anxa1b/dzip1/bmpr2a/vhl/gdf5/skor1a/smad3a/bmp15/f…	66
GO:0042110	GO:0042110	T cell activation	21/4227	80/17036	0.424812	0.948103	0.889347	snapc3/loxl3b/cd74a/loxl3a/ndrg1b/eomesa/chd7/sh3rf1/tnfrsf21/gemin5/hhla2b.2/hhla2b.1/rag2/tnpo3/gata3/anxa1a/anxa1b/mettl3/jak3/zgc:153759/foxp3a	21
GO:1990778	GO:1990778	protein localization to cell periphery	21/4227	80/17036	0.424812	0.948103	0.889347	blzf1/arl13b/si:dkey-27b3.2/ankrd9/si:dkey-206p8.1/si:ch211-188c16.1/anxa13l/rab15/rtkn2b/fybb/ank1b/pacs1a/rnf121/si:ch211-126j24.1/rab3db/nsfa/pigw/zgc:110329/sys1/tspan5a/grip2a	21
GO:0009259	GO:0009259	ribonucleotide metabolic process	70/4227	275/17036	0.42493	0.948103	0.889347	gart/atic/si:dkey-37g12.1/pgam1b/pfklb/nme2a/pank2/elovl6l/cox5b2/nme5/gucy2f/adcy3a/adcy2a/gapdh/gapdhs/eno4/acss1/si:ch211-132f19.7/gpib/pkma/gmps/adcy2b/uck2b/acot11a/prtfdc1/elovl1a/pfkpb/nt5e/adcy1a/enpp1/paics/ppat/cad/si:dkey-206f10.1/uck1/pgam2/adssl/ampd2a/uckl1b/pfkma/elovl4b/eno3/pfkpa/atp6v1ab/coasy/dcakd/pkmb/acot15/mvk/pdha1a/sdhda/ak1/scn1lab/ino80db/ak4/pfkmb/shmt2/gmpr2/mcee/adcy…	70
GO:0006779	GO:0006779	porphyrin-containing compound biosynthetic process	6/4227	21/17036	0.425425	0.948103	0.889347	hmbsb/iba57/tmem14ca/slc25a39/alad/cpox	6
GO:0017004	GO:0017004	cytochrome complex assembly	6/4227	21/17036	0.425425	0.948103	0.889347	coa3a/hccsa.1/ttc19/pet100/cox17/bcs1l	6
GO:0021538	GO:0021538	epithalamus development	6/4227	21/17036	0.425425	0.948103	0.889347	tcf7l2/pitx2/wls/notch1a/pax6a/sec61a1	6
GO:0044773	GO:0044773	mitotic DNA damage checkpoint	6/4227	21/17036	0.425425	0.948103	0.889347	eme1/id2a/dtl/chek2/stk33/rad9b	6
GO:0045494	GO:0045494	photoreceptor cell maintenance	6/4227	21/17036	0.425425	0.948103	0.889347	nxnl2/pde6c/ift57/ift172/napbb/rp2	6
GO:0050678	GO:0050678	regulation of epithelial cell proliferation	6/4227	21/17036	0.425425	0.948103	0.889347	jcada/llgl2/vip/tnmd/trpm7/vegfab	6
GO:0061326	GO:0061326	renal tubule development	6/4227	21/17036	0.425425	0.948103	0.889347	pkd2/osr1/klhl3/nek8/irx3b/gdnfb	6
GO:1902369	GO:1902369	negative regulation of RNA catabolic process	6/4227	21/17036	0.425425	0.948103	0.889347	vip/dnd1/hnrnpa0a/syncripl/rbm24a/hnrnpub	6
GO:1903531	GO:1903531	negative regulation of secretion by cell	6/4227	21/17036	0.425425	0.948103	0.889347	rap1ab/tnfrsf21/amh/anxa1a/anxa1b/lgr4	6
GO:2000826	GO:2000826	regulation of heart morphogenesis	6/4227	21/17036	0.425425	0.948103	0.889347	foxh1/cfap20/fbn2b/atp6v1f/tbx1/dzip1	6
GO:0007632	GO:0007632	visual behavior	7/4227	25/17036	0.430197	0.948103	0.889347	atp6v0e1/vps18/otpa/gnb5a/rlbp1b/pappaa/nyx	7
GO:0010833	GO:0010833	telomere maintenance via telomere lengthening	7/4227	25/17036	0.430197	0.948103	0.889347	hnrnpub/hmbox1b/nhp2/terf2ip/terf1/tnksb/nop10	7
GO:0021761	GO:0021761	limbic system development	7/4227	25/17036	0.430197	0.948103	0.889347	lef1/tdgf1/foxh1/otpa/nsfa/etv5b/sox14	7
GO:0045197	GO:0045197	establishment or maintenance of epithelial cell apical/basal polarity	7/4227	25/17036	0.430197	0.948103	0.889347	dlg2/dlg3/rras/notch1b/atp1b1a/dlg1/epb41l5	7
GO:0055083	GO:0055083	monovalent inorganic anion homeostasis	7/4227	25/17036	0.430197	0.948103	0.889347	slc34a1a/slc12a1/slc12a7a/enpp1/slc12a10.2/slc12a10.3/slc12a8	7
GO:0120034	GO:0120034	positive regulation of plasma membrane bounded cell projection assembly	7/4227	25/17036	0.430197	0.948103	0.889347	cdc42ep1a/cdc42ep4b/dpysl3/nrp1a/cdc42ep1b/cdc42ep2/eps8l3b	7
GO:1901068	GO:1901068	guanosine-containing compound metabolic process	7/4227	25/17036	0.430197	0.948103	0.889347	nme2a/nme5/gmps/prtfdc1/ak4/impdh2/nme8	7
GO:0021953	GO:0021953	central nervous system neuron differentiation	29/4227	112/17036	0.43109	0.948103	0.889347	lef1/dla/ewsr1a/lhx6/auts2a/dld/dlc/prox1a/nkx2.9/lhx8a/insm1a/notch1a/otpa/nkx6.1/wdr73/ncam1a/ephb2a/fzd8a/ppp4ca/nsfa/axin1/gata3/tal2/foxn4/notch1b/lhx3/nr4a2b/ntn1a/evx2	29
GO:0048738	GO:0048738	cardiac muscle tissue development	30/4227	116/17036	0.431632	0.948103	0.889347	mat2aa/mef2ca/fbxo32/cyp26c1/asb2b/klf2b/dpf3/myh6/nrg2a/wwtr1/sept15/ndrg4/cav1/smarca4a/mybpc1/cacna1c/tbx1/dab2/nr2f1a/rbfox2/tomm70a/igfn1.3/igfn1.1/mybpc3/gata1b/nexn/neb/obsl1b/ttn.1/ttn.2	30
GO:0050804	GO:0050804	modulation of chemical synaptic transmission	30/4227	116/17036	0.431632	0.948103	0.889347	slc24a2/nlgn2b/grik1a/rap1ab/nlgn3a/fmr1/cplx2/si:ch211-276c2.2/rims2a/trpm7/cplx3b/mctp2a/cacng7a/grin2da/shisa7b/rims3/slc6a9/napbb/nsmfa/ngfa/syt12/grin2aa/cacng4b/nptx2a/nlgn3b/mctp2b/nlgn2a/grm6a/si:ch211-251b21.1/sypb	30
GO:0099177	GO:0099177	regulation of trans-synaptic signaling	30/4227	116/17036	0.431632	0.948103	0.889347	slc24a2/nlgn2b/grik1a/rap1ab/nlgn3a/fmr1/cplx2/si:ch211-276c2.2/rims2a/trpm7/cplx3b/mctp2a/cacng7a/grin2da/shisa7b/rims3/slc6a9/napbb/nsmfa/ngfa/syt12/grin2aa/cacng4b/nptx2a/nlgn3b/mctp2b/nlgn2a/grm6a/si:ch211-251b21.1/sypb	30
GO:0007173	GO:0007173	epidermal growth factor receptor signaling pathway	8/4227	29/17036	0.433858	0.948103	0.889347	hbegfa/si:ch211-167j9.5/ptk2ab/ptk2ba/btc/hbegfb/si:ch73-173h19.3/tgfa	8
GO:0009620	GO:0009620	response to fungus	8/4227	29/17036	0.433858	0.948103	0.889347	nsdhl/cyp51/ccny/cyb5r2/duox/hspa5/zgc:77112/slc15a2	8
GO:0030240	GO:0030240	skeletal muscle thin filament assembly	8/4227	29/17036	0.433858	0.948103	0.889347	mybpc1/smyd1a/igfn1.3/igfn1.1/mybpc3/obsl1b/ttn.1/ttn.2	8
GO:0032402	GO:0032402	melanosome transport	8/4227	29/17036	0.433858	0.948103	0.889347	arl6/prickle2b/cep131/rab11al/zgc:91968/rab27b/ippk/inpp5e	8
GO:0035825	GO:0035825	homologous recombination	8/4227	29/17036	0.433858	0.948103	0.889347	meiob/ercc4/eme1/msh5/msh4/top2b/hfm1/rmi1	8
GO:0043123	GO:0043123	positive regulation of I-kappaB kinase/NF-kappaB signaling	8/4227	29/17036	0.433858	0.948103	0.889347	grk4/map3k7/terf2ip/traf5/prkcbb/brd4/ror1/tab3	8
GO:0048813	GO:0048813	dendrite morphogenesis	8/4227	29/17036	0.433858	0.948103	0.889347	dbnla/fmr1/tmem106bb/dbn1/caprin2/si:dkey-40c11.2/rbpms2b/zmp:0000001168	8
GO:0050772	GO:0050772	positive regulation of axonogenesis	8/4227	29/17036	0.433858	0.948103	0.889347	dbnla/cdkl5/dbn1/plxnb2a/plxnc1/si:dkey-40c11.2/plxna1b/plxnb1b	8
GO:0050868	GO:0050868	negative regulation of T cell activation	8/4227	29/17036	0.433858	0.948103	0.889347	loxl3b/loxl3a/tnfrsf21/hhla2b.2/hhla2b.1/anxa1a/anxa1b/zgc:153759	8
GO:0051904	GO:0051904	pigment granule transport	8/4227	29/17036	0.433858	0.948103	0.889347	arl6/prickle2b/cep131/rab11al/zgc:91968/rab27b/ippk/inpp5e	8
GO:0055081	GO:0055081	anion homeostasis	8/4227	29/17036	0.433858	0.948103	0.889347	slc34a1a/slc12a1/slc12a7a/enpp1/slc12a10.2/slc12a10.3/slc26a6/slc12a8	8
GO:0060119	GO:0060119	inner ear receptor cell development	8/4227	29/17036	0.433858	0.948103	0.889347	foxj1b/emx2/pax2a/jag1b/myo7aa/tmem132e/fgf3/neurod1	8
GO:1903038	GO:1903038	negative regulation of leukocyte cell-cell adhesion	8/4227	29/17036	0.433858	0.948103	0.889347	loxl3b/loxl3a/tnfrsf21/hhla2b.2/hhla2b.1/anxa1a/anxa1b/zgc:153759	8
GO:0009161	GO:0009161	ribonucleoside monophosphate metabolic process	42/4227	164/17036	0.435896	0.948103	0.889347	gart/atic/pgam1b/pfklb/cox5b2/gapdh/gapdhs/eno4/gpib/pkma/gmps/uck2b/prtfdc1/pfkpb/nt5e/enpp1/paics/ppat/uck1/pgam2/adssl/ampd2a/uckl1b/pfkma/eno3/pfkpa/atp6v1ab/pkmb/prps1a/sdhda/ak1/scn1lab/ino80db/ak4/pfkmb/shmt2/aprt/dhodh/uck2a/impdh2/umps/pfkla	42
GO:0009123	GO:0009123	nucleoside monophosphate metabolic process	43/4227	168/17036	0.43612	0.948103	0.889347	gart/atic/dctd/pgam1b/pfklb/cox5b2/gapdh/gapdhs/eno4/gpib/pkma/gmps/uck2b/prtfdc1/pfkpb/nt5e/enpp1/paics/ppat/uck1/pgam2/adssl/ampd2a/uckl1b/pfkma/eno3/pfkpa/atp6v1ab/pkmb/prps1a/sdhda/ak1/scn1lab/ino80db/ak4/pfkmb/shmt2/aprt/dhodh/uck2a/impdh2/umps/pfkla	43
GO:0006874	GO:0006874	cellular calcium ion homeostasis	44/4227	172/17036	0.436331	0.948103	0.889347	slc24a2/fam155a/si:dkey-28b4.8/pkd2/ryr1a/slc8a1a/letm1/lpar4/pde6a/anxa6/gpr4/stim1a/gpr55a/atp2c1/ptger2a/si:ch211-260p9.3/itpr2/herpud1/bcl2l10/trpc6b/agtr1a/ackr4a/opn4.1/f2rl1.2/f2rl1.1/zgc:171965/atp2a2b/slc8a4a/trpc2b/trpc5b/trpc1/ccr10/pth1a/atp2b1b/atp2a1/atp13a1/cax1/tmem203/ptger3/zgc:172079/atp2a2a/itpr3/gpr18/p2ry8	44
GO:0006091	GO:0006091	generation of precursor metabolites and energy	46/4227	180/17036	0.436712	0.948103	0.889347	mdh1b/ugp2a/pgam1b/mdh2/phka2/pfklb/phkg2/ogdhl/pygl/cox5b2/gapdh/gapdhs/khk/eno4/mdh1ab/hmgcl/gpib/pkma/gyg1a/pask/pfkpb/pgam2/ppp1r3b/oxct1b/pygma/phka1b/pfkma/eno3/gyg1b/pfkpa/idh3a/pkmb/si:ch73-141c7.1/cyb561/gys2/sdhda/scn1lab/ino80db/pfkmb/shmt2/pygmb/ndufaf2/oxct1a/zgc:77112/coq10b/pfkla	46
GO:0008038	GO:0008038	neuron recognition	9/4227	33/17036	0.436758	0.948103	0.889347	robo3/nptnb/sema3d/cnr1/nrp1a/ek1/nptna/nexn/efnb2a	9
GO:0010770	GO:0010770	positive regulation of cell morphogenesis involved in differentiation	9/4227	33/17036	0.436758	0.948103	0.889347	dbnla/cdkl5/dbn1/plxnb2a/caprin2/plxnc1/si:dkey-40c11.2/plxna1b/plxnb1b	9
GO:0010950	GO:0010950	positive regulation of endopeptidase activity	9/4227	33/17036	0.436758	0.948103	0.889347	pmaip1/psme2/bbc3/diablob/rb1/e2f1/baxb/hdr/bcl2l16	9
GO:0010952	GO:0010952	positive regulation of peptidase activity	9/4227	33/17036	0.436758	0.948103	0.889347	pmaip1/psme2/bbc3/diablob/rb1/e2f1/baxb/hdr/bcl2l16	9
GO:0031102	GO:0031102	neuron projection regeneration	9/4227	33/17036	0.436758	0.948103	0.889347	dpysl2b/hmgb1a/ptena/rgma/b3gat1a/csrp1a/lingo1a/cnp/lrp4	9
GO:0050773	GO:0050773	regulation of dendrite development	9/4227	33/17036	0.436758	0.948103	0.889347	dbnla/cdkl5/fmr1/arf6a/dbn1/pacsin1a/caprin2/si:dkey-40c11.2/zmp:0000001168	9
GO:0051905	GO:0051905	establishment of pigment granule localization	9/4227	33/17036	0.436758	0.948103	0.889347	arl6/prickle2b/cep131/kcnj13/rab11al/zgc:91968/rab27b/ippk/inpp5e	9
GO:0042060	GO:0042060	wound healing	52/4227	204/17036	0.437594	0.948103	0.889347	prozb/pros1/lef1/hoxc13b/prph/si:ch1073-278o19.1/becn1/bambia/six3b/galnt2/jag1b/hbegfa/anxa6/tnfrsf1a/ctsba/sema3d/krt17/f3b/plg/insm1a/f2rl1.2/f2rl1.1/zgc:171965/pou5f3/cldnc/prdx5/mgat5/acvr1ba/hoxc13a/vim/cav1/smarca4a/lgals2a/prkcbb/axin1/ano6/atp6v1e1b/gata3/anxa1a/anxa1b/notch1b/plxna1b/evpla/mustn1a/sdc4/dysf/mdka/serping1/notch2/rhoab/hspd1/agr1	52
GO:0044087	GO:0044087	regulation of cellular component biogenesis	62/4227	244/17036	0.438428	0.948103	0.889347	tmod1/gpm6ab/si:ch211-176g13.8/dbnla/ect2/rac3b/baiap2l1a/cdc42ep1a/cdc42ep4b/fmn2b/sar1ab/fmr1/eml2/si:ch211-276c2.2/zgc:158689/tmod4/spire1b/si:ch211-175f11.5/sh3yl1/evla/smyd2a/sptb/vaspb/spire1a/rbm24a/ezrb/myoc/vps18/arpc5b/hnrnpub/napbb/dbn1/limk1b/dpysl3/pfn2/zgc:114123/nrp1a/terf1/ek1/twf1a/cyp11a1/cdc42ep1b/rac3a/zgc:86896/crb3a/baiap2a/kank2/baiap2l1b/waslb/mdm1/atp6v1f/add2/kank1b/cdc4…	62
GO:0070848	GO:0070848	response to growth factor	66/4227	260/17036	0.438603	0.948103	0.889347	tdgf1/smad2/smad9/fgfr1b/rargb/ppp4cb/foxh1/bambia/fgfr3/fgfr2/ids/gdf9/si:rp71-46j2.7/tnmd/bmper/trim71/gdf6a/gdf3/fgf7/smad6b/rgma/dusp22a/si:dkey-222b8.1/tdp2b/dusp22b/kdr/cad/ccbe1/tgfb1b/wwtr1/ngfa/acvr1ba/sall4/tgfbr1b/nrp1a/sulf1/skilb/zmynd11/szl/tob1a/smurf1/ptpro/fgf6b/vegfab/scube1/lemd3/gata3/mtmr4/pxna/bmpr1ba/anxa1a/dab2/rgmb/ntrk2b/anxa1b/dzip1/bmpr2a/vhl/gdf5/skor1a/smad3a/bmp15/f…	66
GO:0048841	GO:0048841	regulation of axon extension involved in axon guidance	10/4227	37/17036	0.439111	0.948103	0.889347	sema6e/sema3d/ncaldb/sema4ab/sema4e/arl3l1/si:ch211-129c21.1/sema5a/sema3c/sema5bb	10
GO:0060350	GO:0060350	endochondral bone morphogenesis	10/4227	37/17036	0.439111	0.948103	0.889347	matn3b/jag1b/anxa6/wls/si:ch211-106n13.3/vwa1/foxd3/col7a1/matn4/notch2	10
GO:1905330	GO:1905330	regulation of morphogenesis of an epithelium	10/4227	37/17036	0.439111	0.948103	0.889347	dvl1b/foxh1/pitx2/gdf3/cfap20/atp6v1f/gdnfb/flot2a/dzip1/vangl2	10
GO:0030837	GO:0030837	negative regulation of actin filament polymerization	11/4227	41/17036	0.441057	0.948103	0.889347	tmod1/tmod4/si:ch211-175f11.5/sptb/twf1a/kank2/add2/kank1b/kank1a/gsnb/kank3	11
GO:0051047	GO:0051047	positive regulation of secretion	11/4227	41/17036	0.441057	0.948103	0.889347	hmgb1a/tcf7l2/vip/panx1a/hmgb1b/rfx6/rab27b/scamp5a/cacna1ha/ano1/zgc:153759	11
GO:0070585	GO:0070585	protein localization to mitochondrion	11/4227	41/17036	0.441057	0.948103	0.889347	timm10/timm50/agk/tomm7/timm13/samm50l/pmpca/chchd4b/grpel1/dnajc15/hspd1	11
GO:0072655	GO:0072655	establishment of protein localization to mitochondrion	11/4227	41/17036	0.441057	0.948103	0.889347	timm10/timm50/agk/tomm7/timm13/samm50l/pmpca/chchd4b/grpel1/dnajc15/hspd1	11
GO:0007052	GO:0007052	mitotic spindle organization	12/4227	45/17036	0.44269	0.948103	0.889347	map9/bora/ewsr1a/si:ch1073-266p11.2/aurkb/kif23/cep126/hnrnpub/efhc1/sass6/birc5b/aurka	12
GO:0021903	GO:0021903	rostrocaudal neural tube patterning	12/4227	45/17036	0.44269	0.948103	0.889347	apc/pax2a/nin/fmr1/wls/rnf152/en2b/pou5f3/wnt10b/wnt1/rarab/slc7a6os	12
GO:0046834	GO:0046834	lipid phosphorylation	12/4227	45/17036	0.44269	0.948103	0.889347	pi4k2a/pik3c2b/si:ch211-25d12.7/pik3c2a/pik3cd/zgc:158659/impa2/socs1a/socs2/si:dkey-172j4.3/pi4kab/dgkh	12
GO:0060349	GO:0060349	bone morphogenesis	14/4227	53/17036	0.445267	0.948103	0.889347	mef2ca/rargb/matn3b/jag1b/anxa6/wls/si:ch211-106n13.3/specc1lb/vwa1/rarab/foxd3/col7a1/matn4/notch2	14
GO:0015748	GO:0015748	organophosphate ester transport	15/4227	57/17036	0.446296	0.948103	0.889347	atp11a/stard7/pitpnab/mfsd2aa/abca1b/atp10b/stard14/pitpnaa/atp8b2/atp8b3/prelid1b/osbpl5/atp8b4/slc37a2/prelid3b	15
GO:0021515	GO:0021515	cell differentiation in spinal cord	15/4227	57/17036	0.446296	0.948103	0.889347	dla/dld/dlc/nkx2.9/insm1a/notch1a/otpa/nkx6.1/fzd8a/gata3/tal2/foxn4/notch1b/lhx3/evx2	15
GO:0022037	GO:0022037	metencephalon development	15/4227	57/17036	0.446296	0.948103	0.889347	pax2a/rest/exosc3/mdga2a/rbm7/bmi1b/brf1b/fzd3a/wdr73/wnt1/roraa/ptpro/prickle1b/znhit3/fgf3	15
GO:0097193	GO:0097193	intrinsic apoptotic signaling pathway	15/4227	57/17036	0.446296	0.948103	0.889347	si:dkey-9i23.15/hyou1/nme5/bbc3/herpud1/bcl2l10/mcl1a/bokb/diablob/baxb/boka/ddit3/vax2/bcl2l16/cerkl	15
GO:0036503	GO:0036503	ERAD pathway	16/4227	61/17036	0.447192	0.948103	0.889347	dnajb14/dnajb12b/dnajb12a/erlec1/syvn1/herpud1/tmub1/uggt1/sel1l/sdf2/rnf121/hsp90b1/hspa5/sdf2l1/derl2/os9	16
GO:0034249	GO:0034249	negative regulation of cellular amide metabolic process	17/4227	65/17036	0.447976	0.948103	0.889347	eif4ebp3l/fmr1/mettl16/trim71/zfp36l1a/ago3b/pabpc1b/ago2/rbm24a/ago4/zfp36l1b/zar1/caprin2/eif4enif1/cth1/mettl3/cpeb1b	17
GO:0031018	GO:0031018	endocrine pancreas development	19/4227	73/17036	0.449275	0.948103	0.889347	rfx3/glis3/apc/ide/sox4b/pepd/rfx6/insm1a/nkx6.1/hoxc8a/sept15/c2cd4a/fscn1a/sox9b/klhl42/anxa1a/anxa1b/notch2/neurod1	19
GO:0046165	GO:0046165	alcohol biosynthetic process	20/4227	77/17036	0.449815	0.948103	0.889347	park7/ipmkb/plcd3b/pgp/qdpra/si:ch211-260p9.3/cyp51/plcd1b/itpkb/nus1/itpkca/ippk/impa2/plcd1a/cyp11a2/mvk/fdx1b/spra/hsd17b7/plcd4b	20
GO:0001503	GO:0001503	ossification	21/4227	81/17036	0.450295	0.948103	0.889347	mef2ca/mapk7/galnt2/rest/clec3ba/ptk2ba/trpm7/wls/chd7/ptch2/enpp1/atraid/adgrg6/omd/ano6/acp5a/abcc6a/mst1/lgr4/sin3b/shox	21
GO:2000147	GO:2000147	positive regulation of cell motility	24/4227	93/17036	0.451442	0.948103	0.889347	tacr3l/syk/tacr1b/sema6e/sema3d/cfap20/sema4ab/sema4e/myoc/si:ch211-129c21.1/nrp1a/sema5a/socs1a/vegfab/sema3c/gata3/tek/anxa1a/anxa1b/sema5bb/gnb1b/cd99l2/fgf3/zgc:153759	24
GO:0007498	GO:0007498	mesoderm development	27/4227	105/17036	0.452259	0.948103	0.889347	tdgf1/rargb/foxh1/dld/osr1/dact2/fgfr2/sept6/pitx2/pcdh10b/enpp2/gdf3/wtip/foxa3/eomesa/klf2b/rasl11b/notch1a/pou5f3/acvr1ba/gpr22a/tbx19/smad3a/cdh1/eif4g2a/fgf17/sp5a	27
GO:1901617	GO:1901617	organic hydroxy compound biosynthetic process	28/4227	109/17036	0.452476	0.948103	0.889347	msmo1/tm7sf2/park7/ipmkb/plcd3b/pgp/qdpra/slc24a5/si:ch211-260p9.3/cyp51/plcd1b/itpkb/nus1/ch25hl2/itpkca/faxdc2/ippk/impa2/plcd1a/tph1a/cyb5r2/cyp11a2/zgc:101540/mvk/fdx1b/spra/hsd17b7/plcd4b	28
GO:0044770	GO:0044770	cell cycle phase transition	32/4227	125/17036	0.453125	0.948103	0.889347	fbxl18/ccna1/psme2/dbf4b/meis1b/mad2l1bp/aurkb/ccna2/trim71/gnl2/ccne2/dbf4/nek10/gpr132a/cdc14aa/ppp1r7/plk3/dtl/anapc4/stmn4/rb1/ccnjl/rbl2/e2f7/ccnd2b/cdkn1ba/anxa1a/ccnb1/anxa1b/ccnb2/cdc14b/usp37	32
GO:0030855	GO:0030855	epithelial cell differentiation	59/4227	233/17036	0.453297	0.948103	0.889347	mcoln1a/glis3/apc/foxj1b/meis1b/pitx3/emx2/pax2a/osr1/dcdc2b/jag1b/ide/npas4l/tnmd/dlc/gmnc/kirrel3l/ptk2ab/thbs3a/kdf1a/marcksb/prox1a/myo7aa/slc44a4/thsd7aa/lama4/ezrb/kdr/tnfrsf21/rfx6/insm1a/shroom3/nkx6.1/fbn2b/mgat5/wwtr1/slc2a1a/itga5/pth1a/c2cd4a/irx3b/mcoln1b/thraa/crb3a/kank2/sox9b/e2f7/gata3/anxa1a/f11r.1/tmem132e/anxa1b/inpp5e/myh9a/e2f8/mettl3/bmp15/fgf3/neurod1	59
GO:0055123	GO:0055123	digestive system development	34/4227	133/17036	0.453347	0.948103	0.889347	pwp2h/apc/tdgf1/rargb/tcf7l2/dld/jag1b/fgfr2/lnx2b/sept6/pitx2/meis3/ahctf1/ptger2a/trpm7/wtip/ehmt2/pard6gb/ptgs2a/chd7/notch1a/wwtr1/dnmt3bb.2/ppdpfb/hoxc8a/isl2a/fscn1a/dnmt1/gpr22a/tbx1/rps6ka3a/ap1m2/vangl2/dhrs9	34
GO:0061061	GO:0061061	muscle structure development	93/4227	370/17036	0.462448	0.948103	0.889347	blzf1/mbnl2/dmd/tmod1/gne/lef1/apc/mat2aa/myo18aa/mef2ca/mapk14b/myh7ba/slc8a1a/rac1a/myof/tcf7l2/dock1/pdlim1/pdlim7/fkrp/postnb/kirrel3l/popdc3/bves/pomgnt2/fbxo32/tmod4/cited4b/gdf6a/marcksb/cyp26c1/smyd2a/prox1a/asb2b/gas8/tpm3/rbm24a/ptch2/klf2b/lama4/akap12b/dpf3/myh6/pgam2/jam3b/slc8a4a/nrg2a/pdlim4/wwtr1/gmppb/csrp1a/lamb2/cavin4b/obscnb/ccdc78/ambra1b/sept15/lgals2a/carm1/flii/axin1/scub…	93
GO:0051240	GO:0051240	positive regulation of multicellular organismal process	67/4227	266/17036	0.466901	0.948103	0.889347	lef1/slc27a1b/syk/smad2/hmgb1a/dbnla/cdkl5/jcada/vip/rest/bace1/panx1a/zbtb16b/hmgb1b/si:ch211-276c2.2/csf3r/gpatch3/utp15/elmo1/rbm24a/atraid/kdr/zar1/tlr5b/tlr5a/notch1a/dbn1/serpinf1/stab1/tcf3b/lpar3/pacsin1a/avpr2ab/birc5b/hoxc9a/itgb1a/nrp1a/sulf1/neurod6a/scamp5a/atp2a1/lgals2a/ano6/pde3a/vegfab/plxnb2a/caprin2/plxnc1/myf6/gata3/tek/gdnfb/anxa1a/si:dkey-40c11.2/ntrk2b/olfm1a/anxa1b/plxna1b…	67
GO:0001516	GO:0001516	prostaglandin biosynthetic process	3/4227	10/17036	0.468779	0.948103	0.889347	ptgs2a/anxa1a/anxa1b	3
GO:0001780	GO:0001780	neutrophil homeostasis	3/4227	10/17036	0.468779	0.948103	0.889347	anxa1a/anxa1b/nr4a2b	3
GO:0006474	GO:0006474	N-terminal protein amino acid acetylation	3/4227	10/17036	0.468779	0.948103	0.889347	naa25/naa15a/naa40	3
GO:0010717	GO:0010717	regulation of epithelial to mesenchymal transition	3/4227	10/17036	0.468779	0.948103	0.889347	llgl2/ek1/parp3	3
GO:0015014	GO:0015014	heparan sulfate proteoglycan biosynthetic process, polysaccharide chain biosynthetic process	3/4227	10/17036	0.468779	0.948103	0.889347	ext1a/ext1b/extl2	3
GO:0021680	GO:0021680	cerebellar Purkinje cell layer development	3/4227	10/17036	0.468779	0.948103	0.889347	exosc3/rbm7/wdr73	3
GO:0032261	GO:0032261	purine nucleotide salvage	3/4227	10/17036	0.468779	0.948103	0.889347	prtfdc1/ampd2a/aprt	3
GO:0032525	GO:0032525	somite rostral/caudal axis specification	3/4227	10/17036	0.468779	0.948103	0.889347	foxh1/itga5/ripply2	3
GO:0035844	GO:0035844	cloaca development	3/4227	10/17036	0.468779	0.948103	0.889347	wtip/pard6gb/vangl2	3
GO:0042982	GO:0042982	amyloid precursor protein metabolic process	3/4227	10/17036	0.468779	0.948103	0.889347	psenen/itm2ca/itm2cb	3
GO:0043363	GO:0043363	nucleate erythrocyte differentiation	3/4227	10/17036	0.468779	0.948103	0.889347	rasa3/ago2/epoa	3
GO:0045920	GO:0045920	negative regulation of exocytosis	3/4227	10/17036	0.468779	0.948103	0.889347	rap1ab/anxa1a/anxa1b	3
GO:0046457	GO:0046457	prostanoid biosynthetic process	3/4227	10/17036	0.468779	0.948103	0.889347	ptgs2a/anxa1a/anxa1b	3
GO:0048895	GO:0048895	lateral line nerve glial cell differentiation	3/4227	10/17036	0.468779	0.948103	0.889347	adgrg6/nsfa/foxd3	3
GO:0048937	GO:0048937	lateral line nerve glial cell development	3/4227	10/17036	0.468779	0.948103	0.889347	adgrg6/nsfa/foxd3	3
GO:0051492	GO:0051492	regulation of stress fiber assembly	3/4227	10/17036	0.468779	0.948103	0.889347	myoc/limk1b/fhod1	3
GO:0060122	GO:0060122	inner ear receptor cell stereocilium organization	3/4227	10/17036	0.468779	0.948103	0.889347	foxj1b/emx2/myo7aa	3
GO:0060142	GO:0060142	regulation of syncytium formation by plasma membrane fusion	3/4227	10/17036	0.468779	0.948103	0.889347	mapk14b/myf6/mapk14a	3
GO:0061484	GO:0061484	hematopoietic stem cell homeostasis	3/4227	10/17036	0.468779	0.948103	0.889347	dnmt3bb.1/polr3k/tfec	3
GO:0070206	GO:0070206	protein trimerization	3/4227	10/17036	0.468779	0.948103	0.889347	scara5/max/p2rx4a	3
GO:0070542	GO:0070542	response to fatty acid	3/4227	10/17036	0.468779	0.948103	0.889347	scdb/ptger2a/nfe2l2a	3
GO:0072178	GO:0072178	nephric duct morphogenesis	3/4227	10/17036	0.468779	0.948103	0.889347	irx3b/glis2b/ttc26	3
GO:0072698	GO:0072698	protein localization to microtubule cytoskeleton	3/4227	10/17036	0.468779	0.948103	0.889347	mapre3a/snx10a/mapre3b	3
GO:0090311	GO:0090311	regulation of protein deacetylation	3/4227	10/17036	0.468779	0.948103	0.889347	spred2a/spred3/jdp2b	3
GO:1900087	GO:1900087	positive regulation of G1/S transition of mitotic cell cycle	3/4227	10/17036	0.468779	0.948103	0.889347	ccnd2b/anxa1a/anxa1b	3
GO:1902107	GO:1902107	positive regulation of leukocyte differentiation	3/4227	10/17036	0.468779	0.948103	0.889347	gata3/anxa1a/anxa1b	3
GO:1902882	GO:1902882	regulation of response to oxidative stress	3/4227	10/17036	0.468779	0.948103	0.889347	nme5/sesn2/cerkl	3
GO:1903035	GO:1903035	negative regulation of response to wounding	3/4227	10/17036	0.468779	0.948103	0.889347	pros1/rgma/plg	3
GO:1903036	GO:1903036	positive regulation of response to wounding	3/4227	10/17036	0.468779	0.948103	0.889347	lgals2a/anxa1a/anxa1b	3
GO:1904262	GO:1904262	negative regulation of TORC1 signaling	3/4227	10/17036	0.468779	0.948103	0.889347	sesn2/rnf152/bmt2	3
GO:0051656	GO:0051656	establishment of organelle localization	54/4227	214/17036	0.469309	0.948103	0.889347	arl6/ltv1/picalma/rap1ab/prickle2b/ndel1a/llgl2/cep131/sar1ab/cetn4/stx3a/cplx2/diaph2/nmd3/clrn1/picalmb/kcnj13/rims2a/rab11al/stx11a/snap25b/wtip/cplx3b/kif23/stard3/zgc:91968/rims3/dnm3a/hnrnpub/napbb/kif13bb/rab27b/sdad1/stx2a/cep19/ippk/birc5b/tmem201/rrs1/rhot1a/llgl1/ndel1b/arfgap3/dnm1a/ccnb1/dnm1b/inpp5e/ccdc151/kif5ab/vangl2/fes/terb2/cdt1/rhoab	54
GO:0055074	GO:0055074	calcium ion homeostasis	46/4227	182/17036	0.470855	0.948103	0.889347	slc24a2/wfs1a/fam155a/si:dkey-28b4.8/pkd2/ryr1a/slc8a1a/letm1/lpar4/pde6a/anxa6/gpr4/stim1a/gpr55a/atp2c1/ptger2a/si:ch211-260p9.3/itpr2/herpud1/bcl2l10/trpc6b/agtr1a/ackr4a/opn4.1/f2rl1.2/f2rl1.1/zgc:171965/atp2a2b/slc8a4a/trpc2b/trpc5b/trpc1/ccr10/pth1a/atp2b1b/atp2a1/atp13a1/cax1/tmem203/casr/ptger3/zgc:172079/atp2a2a/itpr3/gpr18/p2ry8	46
GO:0009262	GO:0009262	deoxyribonucleotide metabolic process	4/4227	14/17036	0.472058	0.948103	0.889347	dctd/cmpk2/rrm2/rrm1	4
GO:0016233	GO:0016233	telomere capping	4/4227	14/17036	0.472058	0.948103	0.889347	dclre1a/dclre1c/tnksb/tinf2	4
GO:0031529	GO:0031529	ruffle organization	4/4227	14/17036	0.472058	0.948103	0.889347	dbnla/sh3yl1/aif1l/eps8l3b	4
GO:0035775	GO:0035775	pronephric glomerulus morphogenesis	4/4227	14/17036	0.472058	0.948103	0.889347	tdgf1/pax2a/osr1/vcana	4
GO:0035914	GO:0035914	skeletal muscle cell differentiation	4/4227	14/17036	0.472058	0.948103	0.889347	marcksb/rbm24a/myf6/klhl41a	4
GO:0043535	GO:0043535	regulation of blood vessel endothelial cell migration	4/4227	14/17036	0.472058	0.948103	0.889347	syk/nrp1a/anxa1a/anxa1b	4
GO:0044380	GO:0044380	protein localization to cytoskeleton	4/4227	14/17036	0.472058	0.948103	0.889347	mapre3a/snx10a/rtkn2b/mapre3b	4
GO:0045143	GO:0045143	homologous chromosome segregation	4/4227	14/17036	0.472058	0.948103	0.889347	hormad1/mei4/syce2/terb2	4
GO:0045773	GO:0045773	positive regulation of axon extension	4/4227	14/17036	0.472058	0.948103	0.889347	dbnla/cdkl5/dbn1/si:dkey-40c11.2	4
GO:0048668	GO:0048668	collateral sprouting	4/4227	14/17036	0.472058	0.948103	0.889347	pard6gb/pik3cd/nos1/mapk14a	4
GO:0050918	GO:0050918	positive chemotaxis	4/4227	14/17036	0.472058	0.948103	0.889347	tdgf1/si:dkey-92i15.4/lgals3b/vegfab	4
GO:0051101	GO:0051101	regulation of DNA binding	4/4227	14/17036	0.472058	0.948103	0.889347	id1/sirt2/id2a/id2b	4
GO:0051445	GO:0051445	regulation of meiotic cell cycle	4/4227	14/17036	0.472058	0.948103	0.889347	fbxo5/hormad1/fbxo43/mettl3	4
GO:0051865	GO:0051865	protein autoubiquitination	4/4227	14/17036	0.472058	0.948103	0.889347	trim71/rnf141/sh3rf1/rnf146	4
GO:0061300	GO:0061300	cerebellum vasculature development	4/4227	14/17036	0.472058	0.948103	0.889347	eef2k/vegfba/slc2a1a/lemd3	4
GO:0099054	GO:0099054	presynapse assembly	4/4227	14/17036	0.472058	0.948103	0.889347	nlgn2b/nlgn3a/nlgn3b/nlgn2a	4
GO:1904064	GO:1904064	positive regulation of cation transmembrane transport	4/4227	14/17036	0.472058	0.948103	0.889347	wnk2/park7/stim1a/wnk1b	4
GO:1905477	GO:1905477	positive regulation of protein localization to membrane	4/4227	14/17036	0.472058	0.948103	0.889347	si:ch211-210b2.2/si:dkey-206p8.1/anxa13l/mief1	4
GO:2000177	GO:2000177	regulation of neural precursor cell proliferation	4/4227	14/17036	0.472058	0.948103	0.889347	sirt2/trim71/chd8/scrt2	4
GO:0045597	GO:0045597	positive regulation of cell differentiation	38/4227	150/17036	0.472441	0.948103	0.889347	lef1/junba/smad2/dbnla/mapk14b/cdkl5/rest/csf3r/rbm24a/atraid/zar1/notch1a/dbn1/serpinf1/tcf3b/lpar3/pacsin1a/neurod6a/lgals2a/carm1/pde3a/plxnb2a/caprin2/plxnc1/myf6/gata3/anxa1a/si:dkey-40c11.2/ntrk2b/anxa1b/plxna1b/plxnb1b/brinp3a.1/brinp3a.2/fgf3/mapk14a/ntrk2a/dlx1a	38
GO:0042330	GO:0042330	taxis	99/4227	395/17036	0.473136	0.948103	0.889347	crmp1/unc5c/apc/tdgf1/musk/dpysl2b/robo3/hmgb1a/mmp13a/pcdh17/rac1a/dpysl4/rest/ncam1b/alcamb/hmgb1b/ccr11.1/enpp2/tnfrsf1a/si:dkey-92i15.4/sema6e/gdf6a/ptk2ba/lgals3b/dpysl5a/hdc/nptnb/sema3d/vaspb/hnrnpr/ncaldb/top2b/sema4ab/yrk/csf3b/si:ch211-241e1.3/ephb3a/usp33/ptprfb/col15a1b/ackr4a/ptch2/tnr/sema4e/fzd3a/unc5da/rb1/nrxn2a/arl3l1/dpysl3/rnf121/si:ch211-129c21.1/slit1b/ephb2a/nrp1a/sema5a/cu…	99
GO:0060249	GO:0060249	anatomical structure homeostasis	31/4227	122/17036	0.473842	0.948103	0.889347	mcoln1a/lef1/nxnl2/auts2a/pde6c/dclre1a/tcf7l2/fbxo32/gdf6a/mcl1a/pif1/ift57/hnrnpub/ift172/napbb/hmbox1b/nhp2/terf2ip/terf1/flnca/mcoln1b/cdipt/dclre1c/flncb/tnksb/acp5a/rp2/nop10/tinf2/piezo1/rif1	31
GO:0000132	GO:0000132	establishment of mitotic spindle orientation	5/4227	18/17036	0.473879	0.948103	0.889347	ndel1a/wtip/ndel1b/ccdc151/vangl2	5
GO:0002072	GO:0002072	optic cup morphogenesis involved in camera-type eye development	5/4227	18/17036	0.473879	0.948103	0.889347	pitx2/sox4b/phactr4b/sox11b/vax2	5
GO:0005978	GO:0005978	glycogen biosynthetic process	5/4227	18/17036	0.473879	0.948103	0.889347	phkg2/gyg1a/pask/gyg1b/gys2	5
GO:0009250	GO:0009250	glucan biosynthetic process	5/4227	18/17036	0.473879	0.948103	0.889347	phkg2/gyg1a/pask/gyg1b/gys2	5
GO:0010594	GO:0010594	regulation of endothelial cell migration	5/4227	18/17036	0.473879	0.948103	0.889347	syk/nrp1a/tek/anxa1a/anxa1b	5
GO:0016925	GO:0016925	protein sumoylation	5/4227	18/17036	0.473879	0.948103	0.889347	zmiz1a/pias4a/sumo1/sumo2a/sumo3b	5
GO:0018195	GO:0018195	peptidyl-arginine modification	5/4227	18/17036	0.473879	0.948103	0.889347	prmt9/prdm14/prmt6/carm1/prmt2	5
GO:0022616	GO:0022616	DNA strand elongation	5/4227	18/17036	0.473879	0.948103	0.889347	mcm3/pold3/fen1/poln/pold2	5
GO:0031365	GO:0031365	N-terminal protein amino acid modification	5/4227	18/17036	0.473879	0.948103	0.889347	naa25/naa15a/nmt1a/ntmt1/naa40	5
GO:0033338	GO:0033338	medial fin development	5/4227	18/17036	0.473879	0.948103	0.889347	lef1/smyd2a/dlx5a/fbln1/atp6v1e1b	5
GO:0039022	GO:0039022	pronephric duct development	5/4227	18/17036	0.473879	0.948103	0.889347	kirrel3l/irx3b/glis2b/ttc26/vhl	5
GO:0045332	GO:0045332	phospholipid translocation	5/4227	18/17036	0.473879	0.948103	0.889347	atp11a/atp10b/atp8b2/atp8b3/atp8b4	5
GO:0046636	GO:0046636	negative regulation of alpha-beta T cell activation	5/4227	18/17036	0.473879	0.948103	0.889347	loxl3b/loxl3a/anxa1a/anxa1b/zgc:153759	5
GO:0051180	GO:0051180	vitamin transport	5/4227	18/17036	0.473879	0.948103	0.889347	zgc:91890/slc52a2/ttpa/slc19a1/slc52a3	5
GO:0070654	GO:0070654	sensory epithelium regeneration	5/4227	18/17036	0.473879	0.948103	0.889347	six3b/hbegfa/insm1a/mgat5/mdka	5
GO:0071383	GO:0071383	cellular response to steroid hormone stimulus	5/4227	18/17036	0.473879	0.948103	0.889347	esr2b/abhd2b/carm1/anxa1a/anxa1b	5
GO:0098727	GO:0098727	maintenance of cell number	5/4227	18/17036	0.473879	0.948103	0.889347	nanos3/lin28a/notch1b/mettl3/med14	5
GO:0140115	GO:0140115	export across plasma membrane	5/4227	18/17036	0.473879	0.948103	0.889347	atp1a1a.5/atp1b3b/atp1b3a/atp1b2a/atp1b1a	5
GO:1990399	GO:1990399	epithelium regeneration	5/4227	18/17036	0.473879	0.948103	0.889347	six3b/hbegfa/insm1a/mgat5/mdka	5
GO:0032984	GO:0032984	protein-containing complex disassembly	28/4227	110/17036	0.474435	0.948103	0.889347	tmod1/apc/map1lc3c/cfl1l/lamp2/tmod4/stmn1b/cfl2/sptb/stmn1a/map1sb/stmn4/napbb/camsap2a/mical2b/atp6v0a1a/nsfa/mical3b/gak/add2/gsnb/mtif3/si:ch211-275j6.5/dnajc6/pbrm1l/ogfod1/map1aa/gle1	28
GO:0051050	GO:0051050	positive regulation of transport	26/4227	102/17036	0.474823	0.948103	0.889347	hmgb1a/wnk2/park7/tcf7l2/sar1ab/vip/si:ch211-210b2.2/panx1a/hmgb1b/stim1a/lgals3b/si:dkey-206p8.1/anxa13l/rfx6/rab27b/ncbp2/scamp5a/mief1/cacna1ha/ano6/wnk1b/anxa1a/dab2/anxa1b/ano1/zgc:153759	26
GO:0006278	GO:0006278	RNA-dependent DNA biosynthetic process	6/4227	22/17036	0.474989	0.948103	0.889347	hnrnpub/hmbox1b/nhp2/terf1/tnksb/nop10	6
GO:0007004	GO:0007004	telomere maintenance via telomerase	6/4227	22/17036	0.474989	0.948103	0.889347	hnrnpub/hmbox1b/nhp2/terf1/tnksb/nop10	6
GO:0031100	GO:0031100	animal organ regeneration	6/4227	22/17036	0.474989	0.948103	0.889347	glis3/ide/pepd/c2cd4a/klhl42/notch2	6
GO:0032456	GO:0032456	endocytic recycling	6/4227	22/17036	0.474989	0.948103	0.889347	si:dkey-76b14.2/inpp5f/ehd2b/rab11fip4a/rab11fip4b/rab35b	6
GO:0034605	GO:0034605	cellular response to heat	6/4227	22/17036	0.474989	0.948103	0.889347	hsp90aa1.2/hspa5/hsf5/sumo1/hsbp1a/ano1	6
GO:0045746	GO:0045746	negative regulation of Notch signaling pathway	6/4227	22/17036	0.474989	0.948103	0.889347	neurl1aa/jag1a/jag1b/chac1/mettl3/neurod1	6
GO:0048570	GO:0048570	notochord morphogenesis	6/4227	22/17036	0.474989	0.948103	0.889347	tdgf1/foxh1/fbn2b/ngs/bmpr2a/vangl2	6
GO:1903312	GO:1903312	negative regulation of mRNA metabolic process	6/4227	22/17036	0.474989	0.948103	0.889347	vip/dnd1/hnrnpa0a/syncripl/rbm24a/hnrnpub	6
GO:0001755	GO:0001755	neural crest cell migration	24/4227	94/17036	0.475201	0.948103	0.889347	radil/lef1/lbh/anxa6/meis3/masp1/sema6e/phactr4b/pak1/sema3d/sema4ab/chd7/sema4e/nrg2a/si:ch211-129c21.1/nrp1a/sema5a/sox10/atp6v0a1a/fscn1a/sema3c/tbx1/sema5bb/foxd3	24
GO:0099504	GO:0099504	synaptic vesicle cycle	24/4227	94/17036	0.475201	0.948103	0.889347	nlgn2b/picalma/rap1ab/nlgn3a/stx3a/cplx2/clrn1/picalmb/rims2a/stx11a/snap25b/cplx3b/rims3/amph/dnm3a/napbb/stx2a/slc17a7b/slc17a6a/dnm1a/nlgn3b/dnm1b/slc32a1/nlgn2a	24
GO:0015698	GO:0015698	inorganic anion transport	23/4227	90/17036	0.475385	0.948103	0.889347	slc34a1a/ttyh1/clns1a/slc12a1/slc12a7a/enpp1/gabrg2/si:ch211-117c9.2/clcnk/ankha/best1/clcn7/ttyh2l/ano6/slc26a6l/slc12a10.2/slc12a10.3/clcn5b/ano1/slc5a5/slc26a6/slc12a8/glra2	23
GO:0032924	GO:0032924	activin receptor signaling pathway	7/4227	26/17036	0.475696	0.948103	0.889347	tdgf1/osr1/dact2/gdf3/acvr1ba/tgfbr1b/fscn1a	7
GO:0048857	GO:0048857	neural nucleus development	7/4227	26/17036	0.475696	0.948103	0.889347	pax2a/rest/mdga2a/fzd3a/prickle1b/fgf3/epb41l5	7
GO:1902036	GO:1902036	regulation of hematopoietic stem cell differentiation	7/4227	26/17036	0.475696	0.948103	0.889347	dld/fgfr3/fgfr2/dnmt3bb.1/tph1a/f11r.1/mettl3	7
GO:2001234	GO:2001234	negative regulation of apoptotic signaling pathway	7/4227	26/17036	0.475696	0.948103	0.889347	hyou1/nme5/lgals3b/herpud1/mcl1a/vax2/cerkl	7
GO:0007586	GO:0007586	digestion	8/4227	30/17036	0.476152	0.948103	0.889347	capn9/tcf7l2/chd7/si:ch73-151m17.5/cav1/cdipt/f11r.1/ptger3	8
GO:0032401	GO:0032401	establishment of melanosome localization	8/4227	30/17036	0.476152	0.948103	0.889347	arl6/prickle2b/cep131/rab11al/zgc:91968/rab27b/ippk/inpp5e	8
GO:0038127	GO:0038127	ERBB signaling pathway	8/4227	30/17036	0.476152	0.948103	0.889347	hbegfa/si:ch211-167j9.5/ptk2ab/ptk2ba/btc/hbegfb/si:ch73-173h19.3/tgfa	8
GO:0043280	GO:0043280	positive regulation of cysteine-type endopeptidase activity involved in apoptotic process	8/4227	30/17036	0.476152	0.948103	0.889347	pmaip1/bbc3/diablob/rb1/e2f1/baxb/hdr/bcl2l16	8
GO:0043523	GO:0043523	regulation of neuron apoptotic process	8/4227	30/17036	0.476152	0.948103	0.889347	sppl3/park7/psenen/foxo3a/ngfa/birc5b/gdnfb/scrt2	8
GO:0048843	GO:0048843	negative regulation of axon extension involved in axon guidance	8/4227	30/17036	0.476152	0.948103	0.889347	sema6e/sema3d/sema4ab/sema4e/si:ch211-129c21.1/sema5a/sema3c/sema5bb	8
GO:1902668	GO:1902668	negative regulation of axon guidance	8/4227	30/17036	0.476152	0.948103	0.889347	sema6e/sema3d/sema4ab/sema4e/si:ch211-129c21.1/sema5a/sema3c/sema5bb	8
GO:1903034	GO:1903034	regulation of response to wounding	8/4227	30/17036	0.476152	0.948103	0.889347	pros1/becn1/rgma/plg/lgals2a/anxa1a/anxa1b/serping1	8
GO:2001056	GO:2001056	positive regulation of cysteine-type endopeptidase activity	8/4227	30/17036	0.476152	0.948103	0.889347	pmaip1/bbc3/diablob/rb1/e2f1/baxb/hdr/bcl2l16	8
GO:0006821	GO:0006821	chloride transport	17/4227	66/17036	0.476353	0.948103	0.889347	ttyh1/clns1a/slc12a1/slc12a7a/gabrg2/clcnk/best1/clcn7/ttyh2l/ano6/slc26a6l/slc12a10.2/slc12a10.3/clcn5b/ano1/slc12a8/glra2	17
GO:0006890	GO:0006890	retrograde vesicle-mediated transport, Golgi to ER	9/4227	34/17036	0.476442	0.948103	0.889347	si:dkey-27b3.2/stx18/rab6bb/copz1/cog7/bet1l/arfgap3/arcn1a/ergic3	9
GO:0071277	GO:0071277	cellular response to calcium ion	9/4227	34/17036	0.476442	0.948103	0.889347	pkd2/cpne4a/cpne2/syt12/syt9b/cpne8/rasa4/syt13/cpne7	9
GO:0007492	GO:0007492	endoderm development	16/4227	62/17036	0.476477	0.948103	0.889347	tdgf1/foxh1/osr1/pitx2/lsr/gdf3/eomesa/rasl11b/notch1a/pou5f3/acvr1ba/nanog/fscn1a/sebox/cdh1/fgf17	16
GO:0001706	GO:0001706	endoderm formation	10/4227	38/17036	0.476617	0.948103	0.889347	tdgf1/foxh1/osr1/gdf3/eomesa/notch1a/pou5f3/acvr1ba/nanog/fgf17	10
GO:0043044	GO:0043044	ATP-dependent chromatin remodeling	10/4227	38/17036	0.476617	0.948103	0.889347	smarcad1b/chd5/psme4a/chd8/smarca4a/smarca1/si:dkey-148h10.5/pbrm1l/piwil1/actr5	10
GO:0046854	GO:0046854	phosphatidylinositol phosphorylation	10/4227	38/17036	0.476617	0.948103	0.889347	pi4k2a/pik3c2b/si:ch211-25d12.7/pik3c2a/pik3cd/zgc:158659/impa2/socs1a/socs2/pi4kab	10
GO:0009066	GO:0009066	aspartate family amino acid metabolic process	11/4227	42/17036	0.476708	0.948103	0.889347	sdsl/tdh2/got2a/asns/cnr1/si:ch211-256m1.8/gcat/got2b/ahcyl1/got1l1/plod1a	11
GO:0097035	GO:0097035	regulation of membrane lipid distribution	11/4227	42/17036	0.476708	0.948103	0.889347	atp11a/atp10b/atp8b2/zgc:123035/arv1/atp8b3/si:ch73-206p6.1/atp8b4/ano6/plscr3b/ano9b	11
GO:0098661	GO:0098661	inorganic anion transmembrane transport	11/4227	42/17036	0.476708	0.948103	0.889347	slc12a1/slc12a7a/gabrg2/ankha/best1/ano6/slc12a10.2/slc12a10.3/ano1/slc12a8/glra2	11
GO:0048015	GO:0048015	phosphatidylinositol-mediated signaling	12/4227	46/17036	0.476737	0.948103	0.889347	pik3c2b/nyap2a/si:ch211-260p9.3/pik3c2a/kdr/pik3cd/zgc:158659/pik3r6b/tek/ntrk2b/pi4kab/ntrk2a	12
GO:0051304	GO:0051304	chromosome separation	12/4227	46/17036	0.476737	0.948103	0.889347	ncapd3/meiob/ercc4/eme1/aurkb/msh4/top2b/ppp1r7/hfm1/anapc4/m1ap/rmi1	12
GO:0060536	GO:0060536	cartilage morphogenesis	12/4227	46/17036	0.476737	0.948103	0.889347	mef2ca/sox9a/matn3b/ids/fat3a/col11a2/wls/si:ch211-106n13.3/vwa1/tbx1/col7a1/matn4	12
GO:0019693	GO:0019693	ribose phosphate metabolic process	72/4227	287/17036	0.479656	0.953312	0.894233	gart/atic/si:dkey-37g12.1/pgam1b/pfklb/nme2a/pank2/elovl6l/cox5b2/nme5/gucy2f/adcy3a/adcy2a/gapdh/gapdhs/eno4/acss1/si:ch211-132f19.7/gpib/pkma/gmps/adcy2b/uck2b/acot11a/prtfdc1/elovl1a/pfkpb/nt5e/adcy1a/enpp1/paics/ppat/cad/si:dkey-206f10.1/uck1/pgam2/adssl/ampd2a/uckl1b/pfkma/elovl4b/eno3/pfkpa/atp6v1ab/coasy/dcakd/pkmb/nudt5/acot15/mvk/prps1a/pdha1a/sdhda/ak1/scn1lab/ino80db/ak4/pfkmb/shmt2/gm…	72
GO:0035270	GO:0035270	endocrine system development	32/4227	127/17036	0.494104	0.981414	0.920594	jag1a/rfx3/glis3/apc/tdgf1/bsx/pitx3/pax2a/jag1b/ide/sox4b/pepd/hey1/rfx6/insm1a/nkx6.1/itga5/hoxc8a/sept15/c2cd4a/thraa/fscn1a/sox9b/klhl42/tbx1/anxa1a/anxa1b/dzip1/ntn1a/fgf3/notch2/neurod1	32
GO:0044089	GO:0044089	positive regulation of cellular component biogenesis	30/4227	119/17036	0.495177	0.982931	0.922017	rac3b/baiap2l1a/cdc42ep1a/cdc42ep4b/fmn2b/si:ch211-276c2.2/zgc:158689/spire1b/evla/vaspb/spire1a/rbm24a/arpc5b/limk1b/dpysl3/pfn2/zgc:114123/nrp1a/terf1/cyp11a1/cdc42ep1b/rac3a/zgc:86896/baiap2a/baiap2l1b/waslb/cdc42ep2/gsnb/zgc:101810/eps8l3b	30
GO:0051272	GO:0051272	positive regulation of cellular component movement	24/4227	95/17036	0.498853	0.98961	0.928282	tacr3l/syk/tacr1b/sema6e/sema3d/cfap20/sema4ab/sema4e/myoc/si:ch211-129c21.1/nrp1a/sema5a/socs1a/vegfab/sema3c/gata3/tek/anxa1a/anxa1b/sema5bb/gnb1b/cd99l2/fgf3/zgc:153759	24

## Sheet: GSE142355_degs_enrich.go.BP.df
	ID	Description	GeneRatio	BgRatio	pvalue	p.adjust	qvalue	geneID	Count
GO:0035082	GO:0035082	axoneme assembly	33/3544	47/17036	4.18874e-13	1.31652e-09	1.17637e-09	dnajb13/ccdc114/dnaaf2/pih1d2/dnah5/dnali1/dnal1/dnaaf4/lrriq1/iqcg/gas8/daw1/spag1a/ccdc39/lrrc6/cfap206/drc1/tbc1d32/dnai1.2/dnai1.1/dnah5l/dnaaf3l/dnaaf3/ccdc103/rsph9/dzip1/ccdc65/ccdc151/ccdc40/ttll3/dnaaf1/si:dkey-208b23.5/dnah7	33
GO:0003341	GO:0003341	cilium movement	40/3544	68/17036	8.34489e-12	1.03193e-08	9.22082e-09	si:ch73-222h13.1/dnah6/tekt4/dnah1/ccdc114/dnah9/mcamb/tekt1/dnaaf4/zbbx/gas8/cfap20/tekt2/ccdc39/ift57/lrrc6/cfap206/afg1lb/drc1/dnai1.2/dnai1.1/cfap53/ippk/arhgef18b/lrrc23/dnaaf3/dnah3/poc1b/glis2b/ccdc103/foxj1a/rsph9/ccdc65/ccdc151/dnah9l/ccdc40/ttll3/gle1/si:dkey-208b23.5/dnah7	40
GO:0001578	GO:0001578	microtubule bundle formation	34/3544	53/17036	9.84982e-12	1.03193e-08	9.22082e-09	dnajb13/ccdc114/dnaaf2/pih1d2/dnah5/dnali1/dnal1/dnaaf4/lrriq1/iqcg/gas8/daw1/spag1a/ccdc39/lrrc6/cfap206/drc1/tbc1d32/dnai1.2/dnai1.1/dnah5l/dnaaf3l/dnaaf3/ccdc103/rsph9/dzip1/ccdc65/ccdc151/ccdc40/ttll3/dnaaf1/tppp3/si:dkey-208b23.5/dnah7	34
GO:0030031	GO:0030031	cell projection assembly	120/3544	333/17036	7.03424e-11	5.52715e-08	4.93878e-08	si:ch73-222h13.1/si:dkey-26i13.8/arl13b/gpm6ab/tekt4/ift46/dnajb13/dbnla/zgc:172352/ptpdc1a/ccdc114/cby1/foxj1b/ablim2/rhoq/llgl2/cdc42ep4b/dnaaf2/dld/pax2a/wdr35/cdc42ep3/cetn4/fmr1/lect2l/ift80/clrn1/sirt2/rhoub/pih1d2/mcamb/zgc:154093/tekt1/dync2h1/cobl/dnah5/itga8/dnali1/ahi1/dnal1/exoc5/wtip/dnaaf4/cfap161/mtss1la/lrriq1/iqcg/gas8/daw1/cfap20/tekt2/spag1a/snx10a/gmnn/elmo1/ccdc13/cdc14aa/ccd…	120
GO:0070286	GO:0070286	axonemal dynein complex assembly	22/3544	28/17036	9.50717e-11	5.97621e-08	5.34003e-08	ccdc114/dnaaf2/pih1d2/dnah5/dnali1/dnal1/dnaaf4/lrriq1/daw1/spag1a/ccdc39/drc1/dnai1.2/dnai1.1/dnah5l/dnaaf3l/dnaaf3/ccdc103/ccdc65/ccdc151/ccdc40/dnah7	22
GO:0120031	GO:0120031	plasma membrane bounded cell projection assembly	111/3544	311/17036	6.91892e-10	3.62436e-07	3.23854e-07	si:ch73-222h13.1/si:dkey-26i13.8/arl13b/gpm6ab/tekt4/ift46/dnajb13/dbnla/ptpdc1a/ccdc114/cby1/foxj1b/ablim2/llgl2/cdc42ep4b/dnaaf2/dld/pax2a/wdr35/cdc42ep3/cetn4/fmr1/lect2l/ift80/clrn1/sirt2/pih1d2/mcamb/zgc:154093/tekt1/dync2h1/cobl/dnah5/itga8/dnali1/ahi1/dnal1/exoc5/wtip/dnaaf4/cfap161/mtss1la/lrriq1/iqcg/gas8/daw1/cfap20/tekt2/spag1a/snx10a/gmnn/elmo1/ccdc13/cdc14aa/ccdc39/tctex1d1/ift57/lrr…	111
GO:0060271	GO:0060271	cilium assembly	94/3544	263/17036	1.26997e-08	5.70218e-06	5.09517e-06	si:ch73-222h13.1/si:dkey-26i13.8/arl13b/tekt4/ift46/dnajb13/ptpdc1a/ccdc114/cby1/foxj1b/llgl2/dnaaf2/dld/pax2a/wdr35/cetn4/lect2l/ift80/clrn1/sirt2/pih1d2/mcamb/tekt1/dync2h1/cobl/dnah5/itga8/dnali1/ahi1/dnal1/exoc5/wtip/dnaaf4/cfap161/lrriq1/iqcg/gas8/daw1/cfap20/tekt2/spag1a/snx10a/gmnn/elmo1/ccdc13/cdc14aa/ccdc39/tctex1d1/ift57/lrrc6/cfap206/cdh2/drc1/tbc1d32/dnai1.2/dnai1.1/cfap53/dub/cep19/c…	94
GO:0044782	GO:0044782	cilium organization	97/3544	275/17036	1.60728e-08	6.31462e-06	5.64241e-06	si:ch73-222h13.1/si:dkey-26i13.8/arl13b/tekt4/ift46/dnajb13/ptpdc1a/ccdc114/cby1/foxj1b/llgl2/dnaaf2/dld/pax2a/wdr35/cetn4/lect2l/ift80/clrn1/sirt2/pih1d2/mcamb/tekt1/dync2h1/cobl/dnah5/itga8/dnali1/ahi1/dnal1/exoc5/wtip/dnaaf4/cfap161/lrriq1/iqcg/gas8/daw1/cfap20/tekt2/spag1a/snx10a/gmnn/elmo1/ccdc13/cdc14aa/ccdc39/tctex1d1/ift57/lrrc6/cfap206/cdh2/drc1/tbc1d32/dnai1.2/dnai1.1/cfap53/dub/cep19/c…	97
GO:0001539	GO:0001539	cilium or flagellum-dependent cell motility	15/3544	18/17036	2.46637e-08	7.75179e-06	6.9266e-06	tekt4/dnaaf2/zgc:66426/tekt1/daw1/cfap20/tekt2/ccdc39/cfap57/lrrc6/drc1/efhc1/foxj1a/rsph9/ccdc65	15
GO:0060285	GO:0060285	cilium-dependent cell motility	15/3544	18/17036	2.46637e-08	7.75179e-06	6.9266e-06	tekt4/dnaaf2/zgc:66426/tekt1/daw1/cfap20/tekt2/ccdc39/cfap57/lrrc6/drc1/efhc1/foxj1a/rsph9/ccdc65	15
GO:0007017	GO:0007017	microtubule-based process	149/3544	475/17036	2.81225e-08	8.03535e-06	7.17997e-06	tuba8l2/si:ch73-222h13.1/si:dkey-26i13.8/dnah6/map9/bora/kif16ba/tekt4/zgc:136908/zgc:65894/ewsr1a/katnal2/ift46/ska2/dnajb13/tuba7l/tuba2/dnah1/kif17/ccdc114/dnah9/kif20bb/ndel1a/llgl2/dnaaf2/tuba4l/wdr35/nin/si:ch1073-266p11.2/aurkb/rgs14a/cetn4/cetn2/fmr1/diaph2/ccdc88b/si:ch211-235e9.8/pih1d2/mcamb/eml2/tekt1/dync2h1/dnah5/tubb5/stmn2a/dync1i1/dnali1/stmn1b/si:ch211-63b16.4/eml1/si:dkey-170l1…	149
GO:0032504	GO:0032504	multicellular organism reproduction	54/3544	138/17036	6.22877e-07	0.000163142	0.000145775	zp3c/tsga10/pld6/nanos3/tdgf1/smad2/ggt1b/ca15b/cxcl12a/vip/rgs14a/nme5/diaph2/hormad1/paqr7b/zp3d.2/zp3d.1/zgc:173556/zp3/zp3.2/cftr/iqcg/pgr/zp3b/buc/mei4/zar1/zp3a.2/zp3a.1/gsdf/sass6/ahr2/amh/wwtr1/birc5b/si:ch211-225h24.2/nanog/sycp3/pde3a/hsf5/golga3/dmrt1/ccnb1/ackr3b/dnaaf1/lgr4/bmp15/m1ap/grip2a/igf3/ggt1a/piwil1/hnrnpa3/cxcr4b	54
GO:0001945	GO:0001945	lymph vessel development	32/3544	67/17036	7.51683e-07	0.000181734	0.000162388	pkd2/junba/pkd1a/syk/lpar1/pkd1b/cxcl12a/itga9/foxo1a/mcamb/etv2/prkd1/prox2/nr2f2/rasgrp4/elmo1/dll4/cad/stab1/mafba/sox18/hoxc9a/cpt1ab/junbb/e2f7/notch1b/bmpr2a/cxcr4a/e2f8/mmp2/lyve1a/aplnra	32
GO:0000226	GO:0000226	microtubule cytoskeleton organization	104/3544	324/17036	1.05026e-06	0.000235783	0.000210683	tuba8l2/map9/bora/zgc:136908/zgc:65894/ewsr1a/katnal2/ska2/dnajb13/tuba7l/tuba2/ccdc114/ndel1a/llgl2/dnaaf2/tuba4l/nin/si:ch1073-266p11.2/aurkb/rgs14a/cetn4/cetn2/diaph2/ccdc88b/pih1d2/eml2/dnah5/tubb5/stmn2a/dnali1/stmn1b/eml1/si:dkey-170l10.1/dnal1/mapre3a/ccdc88c/kiz/wtip/dnaaf4/lrriq1/kif23/iqcg/gas8/daw1/map7d1b/spag1a/stmnd1/ccdc13/cdc14aa/ccdc39/map4l/map1sb/lrrc6/pard3ab/cfap206/katna1/dr…	104
GO:0048609	GO:0048609	multicellular organismal reproductive process	53/3544	137/17036	1.19367e-06	0.000250113	0.000223488	zp3c/tsga10/pld6/nanos3/tdgf1/smad2/ggt1b/ca15b/cxcl12a/vip/rgs14a/nme5/diaph2/hormad1/paqr7b/zp3d.2/zp3d.1/zgc:173556/zp3/zp3.2/cftr/iqcg/pgr/zp3b/buc/mei4/zar1/zp3a.2/zp3a.1/gsdf/sass6/amh/wwtr1/birc5b/si:ch211-225h24.2/nanog/sycp3/pde3a/hsf5/golga3/dmrt1/ccnb1/ackr3b/dnaaf1/lgr4/bmp15/m1ap/grip2a/igf3/ggt1a/piwil1/hnrnpa3/cxcr4b	53
GO:0007018	GO:0007018	microtubule-based movement	67/3544	187/17036	1.35074e-06	0.000260774	0.000233014	si:ch73-222h13.1/si:dkey-26i13.8/dnah6/kif16ba/tekt4/ift46/dnah1/kif17/ccdc114/dnah9/kif20bb/ndel1a/wdr35/fmr1/si:ch211-235e9.8/mcamb/tekt1/dync2h1/dnah5/dync1i1/si:ch211-63b16.4/kif6/dnaaf4/zbbx/kif23/gas8/cfap20/tekt2/ccdc39/kif1ab/ift57/lrrc6/cfap206/afg1lb/drc1/cx43/dnai1.2/dnai1.1/cfap53/ippk/arhgef18b/lrrc23/tmem201/mak/dnah5l/dnaaf3/dnah3/poc1b/glis2b/ccdc103/foxj1a/rsph9/zgc:158640/dync1i…	67
GO:0001946	GO:0001946	lymphangiogenesis	24/3544	45/17036	1.49346e-06	0.000260774	0.000233014	pkd2/pkd1a/syk/lpar1/pkd1b/cxcl12a/itga9/mcamb/etv2/prkd1/prox2/nr2f2/elmo1/dll4/cad/stab1/mafba/sox18/hoxc9a/e2f7/notch1b/cxcr4a/e2f8/lyve1a	24
GO:0036303	GO:0036303	lymph vessel morphogenesis	24/3544	45/17036	1.49346e-06	0.000260774	0.000233014	pkd2/pkd1a/syk/lpar1/pkd1b/cxcl12a/itga9/mcamb/etv2/prkd1/prox2/nr2f2/elmo1/dll4/cad/stab1/mafba/sox18/hoxc9a/e2f7/notch1b/cxcr4a/e2f8/lyve1a	24
GO:0003351	GO:0003351	epithelial cilium movement	18/3544	29/17036	1.6235e-06	0.000268561	0.000239972	dnah6/dnah9/mcamb/dnaaf4/gas8/ccdc39/ift57/lrrc6/cfap53/ippk/lrrc23/poc1b/ccdc103/foxj1a/dnah9l/ccdc40/gle1/si:dkey-208b23.5	18
GO:0007276	GO:0007276	gamete generation	52/3544	135/17036	1.74727e-06	0.000274584	0.000245354	zp3c/tsga10/pld6/nanos3/tdgf1/smad2/ggt1b/ca15b/cxcl12a/rgs14a/nme5/diaph2/hormad1/paqr7b/zp3d.2/zp3d.1/zgc:173556/zp3/zp3.2/cftr/iqcg/pgr/zp3b/buc/mei4/zar1/zp3a.2/zp3a.1/gsdf/sass6/amh/wwtr1/birc5b/si:ch211-225h24.2/nanog/sycp3/pde3a/hsf5/golga3/dmrt1/ccnb1/ackr3b/dnaaf1/lgr4/bmp15/m1ap/grip2a/igf3/ggt1a/piwil1/hnrnpa3/cxcr4b	52
GO:0022412	GO:0022412	cellular process involved in reproduction in multicellular organism	40/3544	96/17036	2.77115e-06	0.000414749	0.000370598	zp3c/pld6/nanos3/tdgf1/smad2/ca15b/cxcl12a/rgs14a/nme5/hormad1/paqr7b/zp3d.2/zp3d.1/zgc:173556/zp3/zp3.2/cftr/iqcg/zp3b/buc/mei4/zar1/zp3a.2/zp3a.1/gsdf/amh/wwtr1/birc5b/sycp3/pde3a/dmrt1/ccnb1/ackr3b/bmp15/m1ap/grip2a/igf3/piwil1/hnrnpa3/cxcr4b	40
GO:0019953	GO:0019953	sexual reproduction	57/3544	158/17036	6.32815e-06	0.000904062	0.000807823	zp3c/tsga10/pld6/nanos3/tdgf1/smad2/ggt1b/ca15b/cxcl12a/vip/rgs14a/nme5/diaph2/hormad1/paqr7b/zp3d.2/zp3d.1/zgc:173556/zp3/zp3.2/cftr/iqcg/pgr/zp3b/ptbp1a/buc/mei4/zar1/zp3a.2/zp3a.1/gsdf/stx2a/sass6/amh/wwtr1/birc5b/si:ch211-225h24.2/nanog/sycp3/bmb/pde3a/hsf5/golga3/dmrt1/ccnb1/ackr3b/dnaaf1/lgr4/bmp15/m1ap/grip2a/igf3/ggt1a/piwil1/hnrnpa3/cxcr4b/plcd4b	57
GO:0044703	GO:0044703	multi-organism reproductive process	57/3544	159/17036	7.88763e-06	0.00107786	0.000963122	zp3c/tsga10/pld6/nanos3/tdgf1/smad2/ggt1b/ca15b/cxcl12a/vip/rgs14a/nme5/diaph2/hormad1/paqr7b/zp3d.2/zp3d.1/zgc:173556/zp3/zp3.2/cftr/iqcg/pgr/zp3b/ptbp1a/buc/mei4/zar1/zp3a.2/zp3a.1/gsdf/stx2a/sass6/amh/wwtr1/birc5b/si:ch211-225h24.2/nanog/sycp3/bmb/pde3a/hsf5/golga3/dmrt1/ccnb1/ackr3b/dnaaf1/lgr4/bmp15/m1ap/grip2a/igf3/ggt1a/piwil1/hnrnpa3/cxcr4b/plcd4b	57
GO:0007292	GO:0007292	female gamete generation	26/3544	55/17036	1.02126e-05	0.00133742	0.00119505	zp3c/pld6/nanos3/smad2/diaph2/hormad1/paqr7b/zp3d.2/zp3d.1/zgc:173556/zp3/zp3.2/pgr/zp3b/buc/mei4/zar1/zp3a.2/zp3a.1/gsdf/wwtr1/birc5b/pde3a/ccnb1/bmp15/igf3	26
GO:0022414	GO:0022414	reproductive process	83/3544	259/17036	1.32597e-05	0.00164173	0.00146696	zp3c/tsga10/pld6/nanos3/tdgf1/smad2/ggt1b/nr0b1/ca15b/ercc4/cxcl12a/fbxo5/vip/rgs14a/nme5/gdf9/tex11/diaph2/zgc:195212/msh5/nbn/hormad1/paqr7b/zp3d.2/zp3d.1/fbxo43/zgc:173556/zp3/zp3.2/msh4/wee2/cftr/iqcg/pgr/pdik1l/top2b/rad21b/zp3b/hfm1/ptbp1a/buc/mei4/zar1/zp3a.2/zp3a.1/gsdf/stx2a/sass6/ahr2/amh/wwtr1/spo11/birc5b/tcf21/si:ch211-225h24.2/rec8b/nanog/sycp3/bmb/syce2/moto/pde3a/hsf5/golga3/anxa1…	83
GO:0000003	GO:0000003	reproduction	84/3544	263/17036	1.3581e-05	0.00164173	0.00146696	zp3c/tsga10/pld6/nanos3/tdgf1/smad2/ggt1b/nr0b1/ca15b/ercc4/cxcl12a/fbxo5/vip/rgs14a/nme5/gdf9/tex11/diaph2/zgc:195212/msh5/nbn/hormad1/paqr7b/zp3d.2/zp3d.1/fbxo43/zgc:173556/zp3/zp3.2/dio2/msh4/wee2/cftr/iqcg/pgr/pdik1l/top2b/rad21b/zp3b/hfm1/ptbp1a/buc/mei4/zar1/zp3a.2/zp3a.1/gsdf/stx2a/sass6/ahr2/amh/wwtr1/spo11/birc5b/tcf21/si:ch211-225h24.2/rec8b/nanog/sycp3/bmb/syce2/moto/pde3a/hsf5/golga3/…	84
GO:0001570	GO:0001570	vasculogenesis	26/3544	56/17036	1.53092e-05	0.00175179	0.0015653	cxcl8a/mb/aplnrb/tbx6/fkrp/etv2/fli1b/tbx20/wdr43/sox7/hey2/egfl7/fbn2b/ell/wwtr1/plcg1/sox18/birc5b/hoxc9a/nrp1a/trpc1/cald1b/cxcr4a/ackr3b/aplnra/stat4	26
GO:0048514	GO:0048514	blood vessel morphogenesis	115/3544	386/17036	1.56061e-05	0.00175179	0.0015653	rasa3/cxcl8a/abca1a/dla/mb/lpar2b/syk/aplnrb/nrarpa/lpar1/esama/gata2a/tbx6/ptenb/nrxn1a/cpn1/pald1a/perp/gng2/thbs2a/ldb2a/igfbp7/lpar6a/sirt2/fkrp/dlc/mcamb/si:ch211-167j9.5/bmper/twist1b/mtdhb/etv2/fli1b/tbx20/ptk2ba/clec14a/wdr43/prkd1/utp15/foxf1/lmo2/fli1a/elmo1/egfra/angptl4/pard3ab/scg2b/lama4/sox7/ptk2bb/dll4/thbs1b/sox11b/mep1a.2/hey2/nus1/hlx1/egfl7/lpar6b/amot/serpinf1/fgf1b/fbn2b/klf…	115
GO:0036158	GO:0036158	outer dynein arm assembly	9/3544	11/17036	2.63371e-05	0.0027837	0.00248737	ccdc114/dnah5/dnal1/dnaaf4/lrriq1/dnai1.2/dnai1.1/dnah5l/ccdc151	9
GO:0051704	GO:0051704	multi-organism process	129/3544	447/17036	2.65705e-05	0.0027837	0.00248737	mxa/mxb/grk4/cxcl8a/cxcl18b/zp3c/tsga10/junba/pld6/nanos3/tdgf1/mpx/smad2/si:ch1073-143l10.2/hhla2a.1/ggt1b/il1b/tnfrsf1b/ca15b/ifit11/ifit10/ch25h/mavs/ifit8/cxcl12a/vip/rgs14a/nme5/nsdhl/lygl1/lect2l/diaph2/atg16l1/tnfrsf1a/hormad1/dgat1b/paqr7b/pycard/zp3d.2/zp3d.1/zgc:173556/zp3/zp3.2/rsad2/cpt1b/nr1h4/cftr/iqcg/pgr/cyp51/zp3b/ripk2/angptl4/ptbp1a/buc/mei4/jun/nfkbiaa/zar1/zp3a.2/zp3a.1/tlr5a…	129
GO:0008202	GO:0008202	steroid metabolic process	37/3544	94/17036	2.97913e-05	0.00292868	0.00261691	msmo1/srd5a2a/rdh8b/tm7sf2/ch25h/nsdhl/zgc:162608/si:ch1073-429i10.1/apoa4b.3/apoa4b.2/apoeb/cyp11c1/cyp51/lipea/apoea/hsd3b2/cyp46a1.1/zgc:123299/cyp46a1.2/cyp46a1.4/cyp46a1.3/dhcr24/cyp39a1/faxdc2/cyb5r2/cyp11a2/cyp11a1/hsd17b12a/zgc:101540/mvk/hsd17b7/hsd11b2/hsd17b12b/star/sult1st2/sult1st3/hsd3b1	37
GO:0009799	GO:0009799	specification of symmetry	87/3544	280/17036	3.07497e-05	0.00292868	0.00261691	dnah6/lmo7b/hand2/pkd2/smad4a/tdgf1/ptpn11a/alcama/ift46/robo3/wdr18/dnah9/tbx6/foxh1/foxj1b/armc4/dld/atl1/atoh8/pitx2/mcamb/hace1/cobl/sybu/tbx20/gdf3/ahi1/exoc5/wtip/dnaaf4/daw1/eomesa/cfap20/snx10a/tdp2b/gmnn/rbm24a/ccdc39/prrx1a/ift57/lrrc6/admp/meis2b/dnai1.1/cfap53/dub/apobec2a/ippk/acvrl1/ubxn10/dnah5l/prickle1a/ndrg4/poc1b/cald1b/lamb1a/glis2b/ttc25/ppp4ca/adap2/fzd2/ccdc103/ier2a/dnmt1/…	87
GO:0009855	GO:0009855	determination of bilateral symmetry	87/3544	280/17036	3.07497e-05	0.00292868	0.00261691	dnah6/lmo7b/hand2/pkd2/smad4a/tdgf1/ptpn11a/alcama/ift46/robo3/wdr18/dnah9/tbx6/foxh1/foxj1b/armc4/dld/atl1/atoh8/pitx2/mcamb/hace1/cobl/sybu/tbx20/gdf3/ahi1/exoc5/wtip/dnaaf4/daw1/eomesa/cfap20/snx10a/tdp2b/gmnn/rbm24a/ccdc39/prrx1a/ift57/lrrc6/admp/meis2b/dnai1.1/cfap53/dub/apobec2a/ippk/acvrl1/ubxn10/dnah5l/prickle1a/ndrg4/poc1b/cald1b/lamb1a/glis2b/ttc25/ppp4ca/adap2/fzd2/ccdc103/ier2a/dnmt1/…	87
GO:0030155	GO:0030155	regulation of cell adhesion	43/3544	116/17036	3.95437e-05	0.00365546	0.00326633	cxcl8a/lmo7b/nrarpa/hhla2a.1/mmrn2b/loxl3a/si:ch211-167j9.5/lgals9l6/lgals9l5/lgals9l1/lgals9l3/ddr1/ptk2ba/emilin1b/agr2/si:ch211-241e1.3/emilin2a/lama4/myoc/ptk2bb/emilin1a/lama5/si:dkey-32e6.6/plxna1a/hhla2b.2/ek1/gna12a/podxl/plxnb2a/si:ch211-127b11.1/plxna4/plxnc1/gata3/tet3/anxa1a/flot2a/plxna1b/emilin2b/plxna3/si:dkey-6n6.1/zgc:153631/zgc:153759/lmo7a	43
[truncated: 2,272 more rows]

## Sheet: GSE111882_degs_enrich.go.BP.df
	ID	Description	GeneRatio	BgRatio	pvalue	p.adjust	qvalue	geneID	Count
[truncated: 2,179 more rows]

## Sheet: Overlap_degs_enrich.go.BP.df
	ID	Description	GeneRatio	BgRatio	pvalue	p.adjust	qvalue	geneID	Count
[truncated: 1,567 more rows]

## Sheet: Overlap_F_enrich.go.BP.df
	ID	Description	GeneRatio	BgRatio	pvalue	p.adjust	qvalue	geneID	Count
[truncated: 1,923 more rows]

[truncated: 1 more sheets: Overlap_M_enrich.go.BP.df]
