# Supplementary material for: Comprehensive Transcriptome Analysis Reveals Sex-Specific Alternative Splicing Events in Zebrafish Gonads
Source: Life (Basel). 2022 Sep 16;12(9):1441. doi: 10.3390/life12091441 (PMC9501657; doi:10.3390/life12091441)
Supplement: Supplementary file 1 [file life-12-01441-s001.zip › Table S4.xlsx]

## Sheet: ES
gene_id	exonStart_0base	exonEnd	upstreamES	upstreamEE	downstreamES	downstreamEE	ovary-PSI	testis-PSI	delta PSI	classification	skip_length	in-frame count	out-frame count
add1	2000933	2001152	1996867	1996948	2004916	2005079	0.9634	0.0477	0.9157	testis SE	219	83	27
anln	35438735	35438789	35438390	35438477	35439022	35439135	0.6185	0.132	0.4865	testis SE	54
apoda.2	37207729	37207798	37207461	37207543	37214609	37214766	0.3044	0.209	0.0954	testis SE	69
arhgap12a	43782764	43782830	43779189	43779318	43783956	43784018	0.9425	0.3789	0.5636	testis SE	66
arrb2a	22901960	22901984	22898609	22898693	22906367	22906444	0.5209	0.0317	0.4892	testis SE	24
brd8	7711632	7711758	7711259	7711362	7715599	7715784	0.9364	0.8051	0.1313	testis SE	126
cast	11617104	11617203	11614238	11614283	11624455	11624518	0.8445	0.2711	0.5734	testis SE	99
cenpe	294243	294309	293855	294136	295600	296057	0.942	0.0032	0.9388	testis SE	66
ckap5	13765644	13765731	13763748	13763874	13765998	13766096	0.6846	0.005	0.6796	testis SE	87
clk4a	6939911	6940002	6939538	6939605	6940579	6940844	0.9905	0.3527	0.6378	testis SE	91
clk4b	32285323	32285414	32284965	32285032	32285846	32286060	0.9717	0.5811	0.3906	testis SE	91
ctnnd1	44215576	44215594	44215006	44215160	44216497	44216563	0.9458	0.335	0.6108	testis SE	18
dab2	32330461	32331085	32327985	32328121	32331809	32331872	0.9815	0.3816	0.5999	testis SE	624
ddx4	6890086	6890134	6884979	6885010	6892059	6892092	0.7038	0.0121	0.6917	testis SE	48
dmd	10834721	10834842	10828538	10828631	10841130	10841374	0.8887	0.7548	0.1339	testis SE	121
dnm2a	47184891	47184903	47181817	47181866	47192633	47192744	0.5102	0.1198	0.3904	testis SE	12
ect2	10396576	10396874	10388635	10389486	10402041	10402182	0.9478	0.0617	0.8861	testis SE	298
eef1db	52568338	52568410	52563182	52563254	52570584	52570669	0.3612	0.0052	0.356	testis SE	72
eml3	17865064	17865514	17861444	17861556	17872100	17872214	0.8909	0.1302	0.7607	testis SE	450
ewsr1b	24875900	24875938	24875451	24875484	24877852	24877982	0.992	0.8064	0.1856	testis SE	38
fgfr1op	30594118	30594181	30589391	30589472	30596507	30596725	0.54	0.0873	0.4527	testis SE	63
foxm1	5825861	5825921	5825570	5825628	5826033	5826162	0.9928	0.2402	0.7526	testis SE	60
hnrnpm	17537895	17537937	17537695	17537794	17538657	17538747	0.9924	0.9093	0.0831	testis SE	42
immt	16102721	16102826	16097069	16097220	16108900	16109017	0.9196	0.3276	0.592	testis SE	105
incenp	3660253	3660271	3659396	3659534	3662242	3662352	0.9897	0.1707	0.819	testis SE	18
kif2c	33930914	33930947	33930762	33930820	33932878	33933010	0.9836	0.108	0.8756	testis SE	33
ktn1	43990659	43990743	43988874	43988958	43996419	43996503	0.9746	0.2433	0.7313	testis SE	84
LOC108191695	4809325	4809388	4807200	4807507	4810136	4811009	0.9355	0.5395	0.396	testis SE	63
lpar2b	59197821	59197854	59192196	59192669	59201231	59201485	0.9489	0.1038	0.8451	testis SE	33
map7d1a	35720874	35720895	35718518	35718587	35728487	35728651	0.9878	0.5142	0.4736	testis SE	21
mapre1a	23384356	23384398	23383877	23384076	23385514	23385621	0.9945	0.001	0.9935	testis SE	42
mapre1b	9802932	9802980	9800962	9801069	9803237	9803436	0.7144	0.0643	0.6501	testis SE	48
mark2a	27216649	27216787	27213086	27213347	27221029	27221118	0.957	0.148	0.809	testis SE	138
marveld2a	2967648	2967774	2959555	2960715	2969772	2969827	0.9593	0.0716	0.8877	testis SE	126
mgea5	11996651	11996737	11995546	11995651	12000033	12000208	0.9795	0.844	0.1355	testis SE	86
mia3	51767729	51767792	51763135	51763388	51772390	51772440	0.9814	0.0088	0.9726	testis SE	63
mia3	51767729	51767795	51763135	51763388	51772390	51772440	0.9883	0.0117	0.9766	testis SE	66
mibp	5119829	5119878	5119252	5119343	5120074	5120249	0.9644	0.7729	0.1915	testis SE	49
mllt10	17211572	17211596	17209412	17209756	17211801	17211883	0.7199	0.1476	0.5723	testis SE	24
mllt10	17211575	17211596	17209412	17209756	17211801	17211883	0.4066	0.0564	0.3502	testis SE	21
mprip	507864	510000	504543	504681	515743	515891	0.711	0.1123	0.5987	testis SE	2136
myef2	5245253	5245306	5244579	5244587	5245699	5245887	0.9964	0.751	0.2454	testis SE	53
myo6a	768792	768828	768057	768218	771946	772050	0.7247	0.2908	0.4339	testis SE	36
nasp	33913789	33914389	33913507	33913572	33914598	33914708	0.8009	0.0677	0.7332	testis SE	600
ncoa5	55427999	55428057	55424549	55424691	55429034	55429247	0.9504	0.3326	0.6178	testis SE	58
ndc1	26581363	26581414	26578389	26578453	26581633	26581746	0.9897	0.2545	0.7352	testis SE	51
ndufv3	19523030	19524155	19518998	19519104	19527719	19528038	0.7272	0.2629	0.4643	testis SE	1125
ndufv3	19523030	19524155	19518998	19519110	19527719	19528038	0.7393	0.2364	0.5029	testis SE	1125
ndufv3	19523030	19524155	19518998	19519116	19527719	19528038	0.4991	0.1761	0.323	testis SE	1125
nfyc	42110867	42110939	42104874	42105051	42114811	42114973	0.9527	0.5864	0.3663	testis SE	72
numa1	44024796	44024847	44020711	44021454	44025578	44025809	0.986	0.0024	0.9836	testis SE	51
numa1	44024811	44024847	44020711	44021454	44025578	44025809	0.9942	0.0127	0.9815	testis SE	36
ogt.1	14729382	14729430	14729008	14729161	14730057	14730222	0.785	0.1246	0.6604	testis SE	48
ralgapa1	12915039	12915070	12910870	12910995	12921996	12922392	0.6506	0.0908	0.5598	testis SE	31
rapgef2	47789812	47790152	47782643	47784509	47794908	47795360	0.881	0.6601	0.2209	testis SE	340
rbm4.1	22805209	22806079	22803134	22803575	22806578	22806803	0.8307	0.4344	0.3963	testis SE	870
rbm5	53277310	53277384	53276532	53276616	53277951	53278021	0.9969	0.7027	0.2942	testis SE	74
rca2.1	26099879	26099944	26094480	26095438	26100855	26100904	0.8786	0.0417	0.8369	testis SE	65
rrbp1a	33616867	33616948	33614844	33614928	33617070	33617154	0.8318	0.1574	0.6744	testis SE	81
sept6	33305345	33305391	33298949	33299144	33306421	33306612	0.352	0.1421	0.2099	testis SE	46
sept7a	11339628	11339649	11336646	11336782	11343644	11343770	0.9633	0.2834	0.6799	testis SE	21
sept7b	47397175	47397196	47394174	47394310	47399516	47399642	0.9755	0.0589	0.9166	testis SE	21
sf1	22813113	22813189	22811172	22811301	22816011	22816164	0.9838	0.7971	0.1867	testis SE	76
si:ch211-140m22.7:19495976-19496996-19490966-19491069-19504420-19504484	19495976	19496996					0.9694	0.0945	0.8749	testis SE	1020
si:ch211-140m22.7:19495976-19496996-19490966-19491069-19504572-19504697	19495976	19496996					0.9724	0.2218	0.7506	testis SE	1020
si:ch211-140m22.7:19504420-19504484-19490966-19491069-19504572-19504697	19504420	19504484					0.9501	0.8115	0.1386	testis SE	64
si:ch211-197h24.6:27546887-27546915-27543892-27543971-27548032-27548113	27546887	27546915					0.9903	0.7816	0.2087	testis SE	28
si:ch73-103b11.2:39312151-39315832-39311348-39311465-39316956-39317104	39312151	39315832					0.9921	0.0844	0.9077	testis SE	3681
slmapa	42310973	42311061	42305548	42307869	42315305	42315440	1	0.5997	0.4003	testis SE	88
smap1	28184181	28184253	28176632	28176713	28196902	28196978	0.789	0.2083	0.5807	testis SE	72
snrpa1	9299871	9299951	9297530	9297633	9303063	9303136	0.9689	0.8216	0.1473	testis SE	80
thoc5	3764504	3764567	3761389	3761487	3765596	3765740	0.9146	0.4827	0.4319	testis SE	63
tpd52l2b	17439642	17439690	17438202	17438304	17447144	17447293	0.9498	0.0826	0.8672	testis SE	48
tpm1	33227779	33227855	33226933	33227004	33229954	33230030	0.9621	0.3835	0.5786	testis SE	76
tpx2	32031185	32031233	32031026	32031101	32031676	32031790	0.9842	0.0199	0.9643	testis SE	48
u2af2b	10318738	10318759	10318322	10318455	10323767	10323839	0.9772	0.7116	0.2656	testis SE	21
ubap2l	7789271	7789427	7787114	7787220	7794616	7794684	0.4984	0.3211	0.1773	testis SE	156
usf2	10565695	10565740	10565308	10565396	10568359	10568418	0.955	0.7379	0.2171	testis SE	45
wdr62	5574237	5574315	5570265	5570970	5575111	5575166	0.9004	0.0164	0.884	testis SE	78
yy1b	54428869	54428902	54428662	54428723	54432736	54432893	0.9982	0.199	0.7992	testis SE	33
zgc:55582:4638906-4639011-4636540-4636937-4641489-4643047	4638906	4639011					0.8007	0.2023	0.5984	testis SE	105
zgc:92287:18035534-18035621-18034343-18034408-18045834-18045896	18035534	18035621					0.9975	0.41	0.5875	testis SE	87
zgc:92287:18038296-18038365-18035959-18036049-18045834-18045896	18038296	18038365					0.6235	0.0142	0.6093	testis SE	69
znf451	1411844	1411950	1409780	1409940	1412040	1412118	0.9831	0.6129	0.3702	testis SE	106
abi2b	10005842	10005929	10003530	10003719	10008270	10008462	0.2102	0.6609	-0.4507	ovary SE	87
bcor	11158665	11158722	11154409	11157430	11159105	11159313	0.4562	0.7497	-0.2935	ovary SE	57
bub1	2625815	2625932	2625354	2625456	2629708	2629737	0.698	0.9977	-0.2997	ovary SE	117
cdc7	10871405	10871501	10871115	10871321	10871807	10871871	0.6341	0.9976	-0.3635	ovary SE	96
col4a3bpb	2553568	2553649	2547987	2548083	2554858	2554951	0.0552	0.4947	-0.4395	ovary SE	81
dlg1l	4912187	4912229	4908731	4908782	4916429	4916463	0.1624	0.4286	-0.2662	ovary SE	42
ehbp1	24254399	24254579	24247536	24247705	24258803	24258955	0.5162	0.917	-0.4008	ovary SE	180
epn1	12747415	12747487	12743856	12744002	12748020	12748104	0.1845	0.7513	-0.5668	ovary SE	72
ino80e	10417462	10417561	10417063	10417175	10419768	10419977	0.275	0.9945	-0.7195	ovary SE	99
LOC100000713	37925122	37925302	37918887	37918953	37931606	37931701	0.3519	0.7462	-0.3943	ovary SE	180
luc7l	39641144	39641211	39638545	39638752	39642432	39642527	0.0598	0.3846	-0.3248	ovary SE	67
mak	8767561	8767641	8767011	8767094	8767837	8767959	0.9663	0.5231	0.4432	testis SE	80
max	28842036	28842063	28835725	28835833	28842392	28842575	0.2621	0.4967	-0.2346	ovary SE	27
nsmce1	44066208	44066286	44065914	44066027	44066909	44067056	0.7048	0.9128	-0.208	ovary SE	78
nup58	25011475	25011571	25008210	25008945	25012684	25012768	0.2053	0.3705	-0.1652	ovary SE	96
rab12	54406016	54406152	54400719	54400780	54408339	54408478	0.0213	0.2179	-0.1966	ovary SE	136
rab6a	36702143	36702249	36699219	36699273	36702424	36702530	0.0239	0.3595	-0.3356	ovary SE	106
rbm39a	24340387	24340448	24340153	24340219	24341801	24341851	0.0343	0.4582	-0.4239	ovary SE	61
rsrp1	45471940	45472000	45470495	45470579	45472194	45472376	0.114	0.3782	-0.2642	ovary SE	60
slmapa	42343648	42343711	42340977	42341037	42350531	42350582	0.101	0.3737	-0.2727	ovary SE	63
srrm1	25428581	25428707	25428139	25428262	25431712	25431883	0.0136	0.1875	-0.1739	ovary SE	126
tp53bp1	52918681	52918816	52918219	52918440	52921353	52921745	0.0572	0.3926	-0.3354	ovary SE	135
tpm1	33229954	33230030	33227779	33227855	33233749	33233812	0.0153	0.381	-0.3657	ovary SE	76
u2surp	26638524	26638560	26638321	26638404	26638801	26638890	0.2662	0.5246	-0.2584	ovary SE	36
vps29	17006699	17006711	17005739	17005836	17008024	17008216	0.0097	0.4772	-0.4675	ovary SE	12
hsf1	3077824	3077902	3072372	3072606	3079720	3079826	0.356	0.519	-0.163	ovary SE	78

## Sheet: A3
gene_id	longExonStart_0base	longExonEnd	shortES	shortEE	flankingES	flankingEE	ovary-PSI	testis-PSI	delta PSI	classification	skip_length	in-frame count	out-frame count
dedd1	10842927	10843421	10842934	10843421	10841586	10841770	0.293	0.7	-0.407	ovary A3	7	5	2
dedd1	10855799	10859955	10859567	10859955	10846613	10846742	0.056	0.254	-0.198	ovary A3	3768
map4k5	36716926	36717044	36716926	36717041	36717464	36717525	0.07	0.722	-0.652	ovary A3	3
rbm39a	24341329	24341851	24341801	24341851	24340153	24340219	0.032	0.267	-0.235	ovary A3	472
rbmx	31856719	31858388	31856719	31856819	31858929	31859021	0.446	0.182	0.264	testis A3	1569
tdrd5	17280204	17280723	17280213	17280723	17278544	17278692	0.568	0.766	-0.198	ovary A3	9
tpx2	32037173	32037361	32037194	32037361	32036839	32036951	0.526	0.972	-0.446	ovary A3	21

## Sheet: A5
gene_id	longExonStart_0base	longExonEnd	shortES	shortEE	flankingES	flankingEE	ovary-PSI	testis-PSI	delta PSI	classification	skip_length	in-frame count	out-frame count
cdc7	10871633	10871871	10871807	10871871	10871115	10871321	0.48	0.994	-0.514	ovary A5	174	16	5
cdc7	10871633	10871871	10871807	10871871	10871405	10871501	0.472	0.993	-0.521	ovary A5	174		2
cep63	27922807	27923129	27922807	27923108	27924878	27925047	0.161	0.5	-0.339	ovary A5	21
ddx5	25270936	25271171	25270949	25271171	25269860	25270810	0.371	0.107	0.264	testis A5	13
eif4a2	7720092	7720317	7720092	7720232	7720719	7720888	0.104	0.371	-0.267	ovary A5	85
eif4a2	7723217	7723361	7723217	7723326	7723661	7723799	0.96	0.768	0.192	testis A5	35
eps8	161779	161913	161878	161913	159670	159782	0.034	0.266	-0.232	ovary A5	99
kansl3	51320498	51320684	51320525	51320684	51319076	51319233	0.426	0.721	-0.295	ovary A5	27
mark2a	27224784	27224920	27224820	27224920	27224059	27224172	0.348	0.073	0.275	testis A5	36
nfyal	25026177	25026350	25026195	25026350	25022669	25022843	0.791	0.071	0.72	testis A5	18
ralgapa1	12818563	12819781	12818563	12818740	12825721	12825846	0.046	0.38	-0.334	ovary A5	1041
srsf7a	36896814	36897133	36896814	36897039	36897394	36897574	0.048	0.355	-0.306	ovary A5	94
tial1	25478347	25479003	25478915	25479003	25477537	25477643	0.007	0.127	-0.121	ovary A5	568
tial1	25478069	25479003	25478915	25479003	25477567	25477643	0.011	0.185	-0.174	ovary A5	846
tjp1b	32264700	32264844	32264700	32264784	32269699	32271397	0.215	0.367	-0.152	ovary A5	60
tjp1b	32264700	32264844	32264700	32264805	32269699	32271397	0.037	0.24	-0.203	ovary A5	39
trnau1apb	24313982	24314410	24314030	24314410	24313722	24313842	0.011	0.219	-0.208	ovary A5	48
trnau1apb	24313982	24314410	24314278	24314410	24313722	24313842	0.008	0.171	-0.163	ovary A5	296
ubtfl	32361580	32361712	32361646	32361712	32361285	32361399	0.367	0.523	-0.156	ovary A5	66
ubtfl	32366916	32367045	32366934	32367045	32366420	32366506	0.671	0.268	0.404	testis A5	18
ubtfl	32373380	32373509	32373395	32373509	32373117	32373273	0.507	0.685	-0.178	ovary A5	15
usf1	21253370	21253516	21253370	21253486	21254797	21254911	0.067	0.258	-0.191	ovary A5	30
zcchc11	42283144	42283640	42283144	42283279	42287155	42287308	0.149	1	-0.851	ovary A5	361

## Sheet: RI
gene_id	riExonStart_0base	riExonEnd	upstreamES	upstreamEE	downstreamES	downstreamEE	ovary-PSI	testis-PSI	delta PSI	classification	skip_length	in-frame count	out-frame count
prrg2	32417072	32417613	32417072	32417375	32417486	32417613	0.699	0.956	-0.258	testis RI	1	2	4
ptp4a1	11271470	11272063	11271470	11271676	11271930	11272063	0.673	0.92	-0.248	testis RI	2
znf318	4307580	4308009	4307580	4307880	4307986	4308009	0.878	0.684	0.194	ovary RI	0
znf318	4307986	4311941	4307986	4308009	4308101	4311941	0.902	0.707	0.195	ovary RI	1
znf318	4308101	4311941	4308101	4308194	4308309	4311941	0.856	0.641	0.215	ovary RI	0
zranb2	37306198	37307487	37306198	37306351	37306535	37307487	0.006	0.134	-0.128	testis RI	2

## Sheet: count and proportion
in-frame count	out-frame count
106	40
0.726027	0.273973

## Sheet: ME
	1stExonStart_0base	1stExonEnd	2ndExonStart_0base	2ndExonEnd	upstreamES	upstreamEE	downstreamES	downstreamEE	ovary-PSI	testis-PSI	delta PSI	classification
rab6a	36702143	36702249	36702424	36702530	36699219	36699273	36704786	36704898	0.033	0.28	-0.247	ovary ME
si:ch211-140m22.7	19495976	19496996	19504420	19504484	19490966	19491069	19504572	19504697	0.613	0.049	0.564	testis ME
si:ch211-140m22.7	19495976	19496996	19504572	19504697	19490966	19491069	19510624	19510934	0.445	0.037	0.408	testis ME
tpm1	33227779	33227855	33229954	33230030	33226933	33227004	33233749	33233812	0.97	0.471	0.499	testis ME
