# Supplementary material for: Comprehensive Transcriptome Analysis Reveals Sex-Specific Alternative Splicing Events in Zebrafish Gonads
Source: Life (Basel). 2022 Sep 16;12(9):1441. doi: 10.3390/life12091441 (PMC9501657; doi:10.3390/life12091441)
Supplement: Supplementary file 1 [file life-12-01441-s001.zip › Table S5 .xlsx]

## Sheet: A3ss_1st3ss
ctrl	ACs	ATCs	AOCs	tDASGs	oDASGs
11.1	8.34	8.34	5.69	-28.97	-2.16
3.79	9.07	9.07	-23.08		10.4
7.11	6.77	6.77	5.77		-22.48
5.48	8.75	8.75	-10.8		8.6
10.8	-15.65	-15.65	-20.17		3.1
-21.06	-14.53	-14.53	-24.37		2.34
-29.69	8.83	8.83	8.75
-26.14	9.06	9.06	8.6
-21.19	1.81	1.81	-15.42
-15.35	9.13	9.13	4.48
-5.83	-7.8	-7.8	2.34
-2.86	6.61	6.61	10.93
9.37	13.19	13.19	-16.23
-23.48	-40.19	-40.19	-17.99
-0.15	9	9	-22.48
-17.02	1.65	1.65	5.45
10.23	-28.97	-28.97	-11.17
9.89	-34.04	-34.04	-22.79
5.69	4.42	4.42	4.83
-27.9	8.15	8.15	-19.94
-29.26	-1.92	-1.92	4.61
-19.18	-17.36	-17.36	-28.97
-25.94	-2.16	-2.16	-4.38
-7.22	-2.76	-2.76	8.49
10.78	-34.23	-34.23	9.71
-26.37	-16.55	-16.55	-22.47
6	-19.73	-19.73	-2.16
0.49	10.2	10.2	10.4
8.34	6.14	6.14	-32.88
5.58	-19.8	-19.8	10.01
9.07	6.53	6.53	3.2
10	10.62	10.62	-1.14
-5.45	7.21	7.21	-23.16
-17.93	-18.62	-18.62	-26.95
-5.93	-22.88	-22.88	-17.93
8.28	-18.78	-18.78	-31.45
-14.5	-25.29	-25.29	1.91
-17.69	7.5	7.5	-22.31
-21.58	5.23	5.23	11.54
-34.77	9.31	9.31	4.36
6.41	-25.27	-25.27	-30.61
-20.92	-10.61	-10.61	8.18
-23.08	9.87	9.87	5.08
6.34	-2.73	-2.73	-1.69
5.77	6.33	6.33	-3.26
-0.98	-25.52	-25.52	-21.01
-21.56	6.46	6.46	3.2
-17.06	2.96	2.96	3.26
-18.69	-13.63	-13.63	9.55
-20.6	-12.68	-12.68	0.42
-12.81	4.38	4.38	4.42
-33.11	3.94	3.94	-16.02
5.85	-2.74	-2.74	6.3
3.27	-26.9	-26.9	-24.08
-21.02	-5.04	-5.04	-20.91
-10.8	8.22	8.22	-29.4
4.61	6.34	6.34	4.89
3.87	6.2	6.2	6.39
-11.76	7.76	7.76	-42.59
5.9	-14.99	-14.99	3.1
4.43	-29.81	-29.81	-23.56
-20.17	9.5	9.5	-21.04
2.15	6.69	6.69	-4.58
-42.56	6.24	6.24	-16.08
7.64	-30.73	-30.73	-17.27
-24.37	2.57	2.57	2.34
-36.75	-22.83	-22.83	3.07
-20.6	-12.68	-12.68	-0.21
-24.92	4.25	4.25	3.54
6.2	-17.2	-17.2	-25.52
-32.76	4.5	4.5	-41.54
8.41	6.49	6.49	10.72
-28.41	-24.9	-24.9	-19.23
5.36	-23.15	-23.15	2.38
8.75	3.81	3.81	5.43
-11.45	5.69		-26.5
-21.54	-23.08		-5.13
-41.18	5.77		-16.75
-21.68	-10.8		-26.09
3.85	-20.17		-16.77
-0.43	-24.37		3.7
4.88	8.75		9.91
2.26	8.6		-19.33
7.48	-15.42		12.13
-19.62	4.48		5.58
7.28	2.34		-32.82
-18.34	10.93		-3.03
8.56	-16.23		1.94
2.29	-17.99		-43.68
6.43	-22.48		-10.61
5.46	5.45		-28.47
-23.37	-11.17		7.76
7.04	-22.79		2.48
7.77	4.83		8.63
-3.6	-19.94		-21.69
7.14	4.61		6.29
7.63	-28.97		-9.52
9.41	-4.38		-24.25
0.51	8.49		-17.63
-18.74	9.71		6.77
8.6	-22.47		-14.47
6.35	-2.16		6.24
1.72	10.4		-23.19
1.25	-32.88		10.93
8.83	10.01		2.92
-13.1	3.2		8.58
5.85	-1.14		10.87
2.44	-23.16		-13.53
8.31	-26.95		7.29
6.74	-17.93		-21.53
-21.38	-31.45		-13.14
-23.87	1.91		2.67
-15.65	-22.31		-24.22
-36.67	11.54		9.1
-22.1	4.36		-11.04
9.56	-30.61
6.13	8.18
1.53	5.08
-14.53	-1.69
-29.39	-3.26
11.18	-21.01
-7	3.2
7.06	3.26
6.52	9.55
9.32	0.42
3.81	4.42
-27.3	-16.02
6.01	6.3
7.15	-24.08
3.96	-20.91
10.85	-29.4
3.41	4.89
8.83	6.39
-20.33	-42.59
-6.1	3.1
-21.79	-23.56
11.2	-21.04
9.33	-4.58
6.67	-16.08
10.1	-17.27
-19.3	2.34
-23.78	3.07
-17.84	-0.21
6.4	3.54
7.08	-25.52
-32.35	-41.54
-22.46	10.72
4.48	-19.23
-12.59	2.38
5.7	5.43
-25.94	-26.5
11.28	-5.13
-7	-16.75
6.07	-26.09
3.16	-16.77
3.45	3.7
6.65	9.91
-12.75	-19.33
1.15	12.13
3.18	5.58
-29.45	-32.82
-6.92	-3.03
2.34	1.94
-18.22	-43.68
-36.96	-10.61
1.58	-28.47
-4.34	7.76
4.66	2.48
1.61	8.63
9.77	-21.69
-19.85	6.29
5.73	-9.52
9.06	-24.25
3.3	-17.63
8.35	6.77
2.14	-14.47
-21.04	6.24
9.1	-23.19
4.47	10.93
1.81	2.92
4.91	8.58
-15.78	10.87
4.72	-13.53
8.6	7.29
4.88	-21.53
10.93	-13.14
-14.5	2.67
7.05	-24.22
6.89	9.1
-6.46	-11.04
-24.91
-20.14
-9.22
2.49
7.65
2.15
6.56
4.3
6.72
-16.23
9.13
6.48
6.64
-14.94
5.37
6.33
5.37
6.21
-6.18
7.55
5.27
7.86
1.76
0.82
10.83
-12.92
-23.56
6.73
-27.64
9.32
2.77
9.98
-2.32
7.03
-11.95
-3.16
7.84
8.43
8.34
10.28
7.56
8.12
4.25
-5.69
-17.99
-7.8
5.43
-34.8
4.46
10.05
4.19
8.45
-3.9
-49.78
-35.59
-16.62
4.86
4.14
-19.02
6.61
0.61
13.19
4.82
10.21
-18.24
0.08
-21.14
-34.73
9.58
6.71
11.88
1.36
-29.1
-40.19
-18.35
-4.37
-31.14
5.94
0.73
5.45
4.89
4.15
4.34
-21.37
-2.87
5.84
-27.62
-29.88
-10.87
-11.17
-13.17
-22.79
5.65
7.1
10.1
2.55
4.26
5.86
1.46
7.77
-10.67
-32.93
-7.81
9.18
5.86
-8.44
-21.95
1.62
8.88
-15.32
4.04
-12.23
4.83
7.28
-27.5
-19.94
-29.86
-20.1
9
-9.83
7.37
2.9
4.61
9.51
-11.55
-22.81
1.65
-12.82
1.44
-34.04
5.3
5.84
4.38
2.22
-11.99
5.11
8.37
-37.84
5.72
-32.57
12.02
-29.3
8.74
-16.16
-20.58
4.42
8.76
-4.38
10.15
-46.11
-11.96
-0.04
6.53
7.83
-18.47
-3.38
8.49
-24.62
8.15
-2.43
5.52
10.52
1.47
-43.28
7.11
-10.96
-41.5
6.48
5.99
-21.6
7.37
5.34
-24.49
-10.18
5.85
1.77
8.77
3.2
1.68
6.74
5.44
-36.77
-6.19
-17.66
9.09
7.89
-1.92
7.63
-17.66
-19.36
-1.47
-1.04
9.71
8.98
-17.87
-20.03
-15.26
8.72
-5.99
-28.71
8.51
7.28
5.92
-2.74
5.26
9.73
-15.24
-10.38
-42
-45.6
-13
-21.26
-21.79
-17.36
-24.93
-29.24
-19.54
-16.29
-16.33
-31.78
-26.13
-15.95
-13.75
-23.48
8.95
4.53
-4.64
-19.28
-26.14
0.64
-2.16
10.4
-8.73
5.16
4.57
-5.97
10.12
4.87
5.65
4.12
-45.08
-14.97
5.34
-32.88
-32.9
9.36
6.67
6.39
6.21
10.01
-37.4
11.99
2.95
3.2
6.07
3.57
7.03
8.84
-21.38
6.69
11.02
-15.1
-5.84
-13.1
-13.17
10.09
-15.59
9.23
-39.83
8.17
-1
6.87
-6.09
7.71
7.6
1.02
3.24
-32.79
-1.14
6.57
4.72
3.87
-37.73
-36.27
1.62
-23.16
6.51
-40.02
3
5.24
-2.76
2.94
3.75
-12.28
-19.06
-38.12
-13.71
-1.26
4.92
-14.12
-26.95
-26.33
-20.64
-31.34
7.95
-23.28
-17.93
5.29
5.24
-21.93
-34.23
-14.65
6.95
3.95
3.08
7.94
-25.8
-14.53
5.43
5.75
-30.96
4.55
5.24
5.48
-34.67
-35.05
-31.45
-21.58
5.24
6.81
-17.54
-8.18
2.39
1.91
7.91
4.13
8.06
-16.55
-19.73
10.39
-11.35
-27.75
7.86
-19.15
7.01
-0.13
5.81
7.89
3.34
7.59
-6.52
7.25
1.35
2.84
5.31
5.07
8.14
10.2
2.9
-14.1
-16.47
-18.22
-15.36
5.61
6.14
7.31
-22.9
-32.33
-34.44
-13.73
1.2
5.87
9.3
4.2
3.52
2.33
7.07
0.86
8.47
3.07
2.12
-19.8
-20.31
-18.33
-38.19
-22.31
3.29
5.26
7.21
11.54
4.36
4.82
0.59
-20.25
-16.19
6.51
-0.65
-41.36
6.51
6.76
-45.12
9.69
-16.23
-45.7
1.15
9.79
-18.54
6.36
-30.61
-7.22
-26.82
-27.16
-16.54
8.18
-4.1
-29.71
6.96
6.04
10.72
3.58
0.43
6.43
-2.14
-10.25
-30.49
6.41
-0.73
9.13
6.76
6.69
7.33
-25.86
-45.49
5.08
-1.69
4.09
-25.49
-20.68
-18.12
6.53
-3.26
10.62
1.85
-24.24
-15.77
8.19
7.24
2.35
6.05
7.21
5.72
-18.62
1.07
8.94
9.98
-7.02
-21.01
3.2
-18.07
7.28
9.42
-22.18
-1.27
9.09
-0.61
-6.46
-9.22
6.49
6.55
4.48
4.47
8.52
-26.8
-38.84
-3.43
-19.29
10.09
-20.23
-25.01
-18.99
7.55
-27.23
8.02
-32.72
5.16
5.01
7.84
6.97
-19.42
-21.81
3.26
3.82
-5.18
-33.18
9.55
-38.12
-17.83
-24.15
9.52
6.02
1.33
6.91
6.78
0.2
2.21
1.23
8.21
-22.46
-21.44
-18.02
9.9
-11.4
-39.41
-31.23
0.42
8.94
-7.82
4.99
-24.56
-23.24
3.94
-18.78
8.83
4.42
-30.08
-16.39
-30.44
-12.56
-20.88
-25.29
-19.09
7.68
7.06
-28.05
6.16
3.72
-9.86
-44.42
-18.1
4.99
4.94
-19.79
4.11
6.64
7.19
9.43
4.31
-35.48
6.39
6.96
7.5
3.96
8.05
6.98
-5.7
-17.59
-20.9
-40.54
-18.67
6.6
5.14
1.13
8.08
-32.56
5.7
2.08
-13.89
-25.67
-16.02
7.47
6.3
3.29
4.83
-24.08
8.41
-40.75
7.54
-43.39
3.72
-25.49
-6.46
-44.23
-10.97
4.08
3.76
1.55
-9.83
-7.35
-23.45
6.73
-28.62
-25.94
-16.76
-28.79
-14.15
-28.63
-11.39
-20.91
-0.34
0.86
-16.97
-17.93
-2.22
3.98
-22.45
-16.89
-14.13
-29.4
-26.07
6.95
4.89
-5.93
5.07
-9.57
-43.65
-13.67
-29.09
-19.2
-20.71
-10.93
8.43
-25.56
-46.09
-26.26
-10.64
2.66
9.22
8.73
-31.24
4.49
4.62
5.23
-21.52
-20.23
-24
8.3
5.55
9.31
4.95
4.59
-28.09
6.45
10.68
2.57
-13.83
3.68
6.39
-13.37
-42.59
9.93
-5.99
3.84
3.14
6.7
0.91
8.48
8.74
8.41
3.81
6.23
-5.25
-23.92
6.16
-0.15
-37.39
-10.85
5.66
-8.05
-18.64
5.42
-23.56
-21.04
6.38
10.82
6.56
-44.65
2.19
-0.92
9.76
12.43
5.42
3.87
8.27
-17.05
-26.68
3.49
-5.76
11.57
-30.86
-21.27
-21.27
-3.41
3.81
10.99
-7.91
-50.24
11.45
1.04
2.44
8.75
-33.03
-9.21
1.74
3.8
6.82
9.35
10.04
0.67
-9.66
11.63
9.08
-6.57
-26
-13.74
4.65
8.84
1.55
-18.78
-30.22
-9.69
-17.81
7.81
1.87
1.51
0.89
-35.63
-32.75
-25.27
-26.33
7.48
3.49
-8.34
4.45
-6.77
8.99
7.3
-4.58
8.59
5.03
-12.78
5.23
4.32
-3.88
-25.25
5.92
-23.73
-29.85
-25.21
2.79
7.25
3.05
-0.3
-16.08
-11.49
-25.66
-4.41
-17.27
-21.8
-15.21
-17.33
-0.72
5.37
-14.3
3.43
-10.61
-6.82
4.1
-1.5
6.82
-27.04
-6.52
-31.95
-37.71
13.61
8.86
-21.64
3.97
-24.98
-25.04
6.29
3.07
6.81
12.75
0.78
-13.72
-13.05
-1.19
4.28
10.24
9.28
-2.73
-34.06
6.33
-20.64
7.98
4.14
7.9
-32.98
-0.21
1.75
7.01
9.26
10.55
8.07
1.48
6.85
-0.92
3.54
-25.52
8.11
0.87
-25.88
5.99
2.23
3.6
-13.78
-29.22
4.6
-26.11
2.88
3.37
10.74
-41.54
10.72
-2.49
-16.91
8.21
5.01
-18
6.46
4.15
-33.14
-18.19
-15.79
-14.37
-25.22
-17.62
3.63
2.57
-5.03
-14.38
4.54
1.22
-34.65
-19.23
7.76
-6.56
11.87
-45.52
-43.68
6.5
2.38
3.22
5.05
4.25
5.66
5.43
5.25
-22.37
6.95
6.05
-9.21
10.64
6.94
-26.5
-5.18
2.96
6.89
1.29
-19.17
-9.28
10.49
-22.98
-24.12
8.56
6.94
8.09
8.09
-31.17
5.91
-36.13
5.13
4.41
4.86
8.55
-13.63
-40.94
8.36
-3.13
6.2
-5.93
1.15
-5.13
7.64
2.72
-16.75
-26.09
5.54
6.66
6.18
6.57
9.33
-12.68
-30.25
9.76
-17.11
-3.72
-10.57
10.61
4.25
3.66
4.34
4.84
-17.67
8.03
6.36
6.98
-19.66
-23.27
-20.13
-14.38
-17.66
7.43
8.68
-36.15
4.15
-17.87
7.47
-16.77
3.16
3.7
9.91
5.39
5.97
-0.69
7.22
4.38
7.08
-19.33
-14.23
2.74
8.73
2.89
-2.94
2.03
10.1
3.94
-19.38
-8.11
-29.67
-23.14
-21.03
-4.79
12.13
-31.93
5.98
1.42
3.63
-16.93
-14.81
9.89
-2.74
4.62
6.17
7.45
-18.57
7.9
-15.54
5.58
-32.82
-31.35
4.04
7.47
6.59
-30.38
-37.15
7.95
5.37
-20.34
7.6
-15.84
3.76
-24.76
5.68
7.3
-5.04
-27.09
-35.75
7.3
-30.13
-2.14
-1.91
1.45
-20.91
4.76
-17.3
-9.32
-13.85
-33.86
-22.91
-3.03
-18.37
4.76
7.62
8.59
4.13
7.64
-32.17
1.94
5.05
8.22
0.06
-24.32
7.36
-14.06
2.5
5.03
0.07
-2.05
-18.86
6.34
4.75
7.06
-20.59
-41.93
6.2
6.39
6.48
4.43
-25.53
4.37
5.28
5.51
-25.08
-43.68
6.31
8.79
2.67
1.39
-6.88
-23.29
-10.61
-9.06
-10.21
-35.09
3.44
6.37
7.76
7.79
5.9
6.72
5.51
7.93
-28.47
7.76
-15.12
4.59
8.33
-14.8
8.3
-29.63
5.59
2.48
-20.83
7.36
-24.7
10
-25.52
3.17
8.08
5.51
6.3
-14.99
-22.12
-12.99
-9.16
-8.72
-30.21
-6.84
-33.88
10.04
3.54
-39.22
-22.55
3.36
-18.97
8.29
6.51
-1.69
8.13
-13.03
-21.4
4.97
0.88
-7.13
5.42
7.25
-24.64
7.32
-25.5
8.47
8.7
7.51
-44.21
-20.96
-7.99
-12.11
-37
-12.47
11.12
8.63
-20.19
-20.19
8.26
10.14
2.79
6.37
-37.9
-14.55
-21.69
-25.01
-28.5
-17.41
10.48
5.12
-17.33
9.26
-21.9
7.21
8.86
-22.44
-23.92
5.01
4.14
-12.22
-33.35
-17.25
6.14
-10.08
-17.38
-36.21
6.29
-9.52
6.4
5.21
5.97
-30.87
-11.82
7.62
-16.21
7.08
9.38
-27.69
-15.05
-3.67
-2.98
-20.88
5.28
0.28
7.1
9.41
-28.09
6.55
2.03
6.14
3.03
-14.94
11.11
-0.97
-23.69
4.88
-11.66
-19.67
-41.78
4.9
5.11
2.51
8.85
10
-21.86
-19.32
-13.47
-28.35
-24.17
4.53
-0.44
9.14
7.8
-4.13
8.15
6.68
9.7
-15.2
7.22
3.97
7.71
-29.81
-24.26
-0.93
1.9
-24.25
-18.09
-27.24
7.26
8.37
-6.07
-10.87
-10.64
-1.81
5.39
5.26
-17.63
-24.62
-10.74
-5.65
8.01
1.68
0.77
11.7
-38.84
-43.08
-23.1
-23.1
-23.1
-23.1
-23.1
7.11
-21.93
7.93
7.77
-20.14
7.54
-8.33
-24.79
-35.34
8.82
6.77
9.18
-5.26
5.01
5.01
9.5
-5.42
-15.96
-22.94
8.09
8.54
-2.47
3.94
10.28
8.71
3.77
-44.4
-14.39
-41.95
-16.25
-27.18
3.18
1.38
3.45
6.29
8.43
11.43
2.92
-20.16
-21.89
-11.11
-10.24
5.07
4.76
10.13
7.33
-9.74
-20.29
9.89
-32.9
6.69
-14.47
-34.73
-35.44
7.73
-17.21
2.46
5.45
-37.69
6.24
-12.7
6.81
4.1
-23.19
-13.48
-30.93
-31.74
6.08
7.52
10.59
8.22
4.67
7.07
-33.33
-21.04
-8.49
-27.07
5.18
4.69
4.06
2.52
4.6
-26.06
12.81
6.8
5.31
-10.35
4.79
-36.26
10.18
10.42
9.82
1.61
10.93
5.81
-16.22
-21.53
-20.77
-7.18
-14.3
6.39
-35.97
9.52
-30.73
-16.01
7.77
2.92
-8.95
1.81
5.73
4.18
-15.8
-26.73
-31.25
11.45
-47.5
-35.76
4.66
-25.53
5.84
5.03
9.1
5.72
-1.96
9.51
8.92
4.49
6.22
6.8
3.53
8.58
3.1
-6.05
4.05
10.84
2.57
-11.93
-26.13
6.93
-29.12
3.34
-1.29
8.12
1.55
5.05
1.62
-26.97
1.3
-1.18
11.63
-24.5
6.91
-1.18
6.62
10.87
9.08
-8.46
-19.36
-41.72
8.12
-29.44
-11.32
-29.26
-23.55
-36.62
8.62
-5.06
-0.09
-11.83
-13.53
9.42
2.92
5.09
-22.31
-28.36
-39.71
-8.29
-1.43
2.55
-2.9
-15.88
3.03
6.02
-30.1
-38.2
0.33
5.74
7.47
6.15
4.31
7.29
-19.81
-30.28
5.13
-22.83
4.85
4.97
3.92
-21.06
-21.53
-33.34
-12.68
-22.77
2.85
4.25
6.95
-27.15
3.18
-20.1
-2.37
-4.52
5.14
3.27
5.91
-38.28
6.78
-18.75
-6.54
-39.27
10.47
3.28
0.38
-45.46
-21.12
-17.73
-13.6
-14.69
8.8
8.01
8.97
8.54
-9.05
-32.18
-10.84
-31.99
9.17
7.15
5.16
3.48
-17.45
-22.29
-13.89
6
-22.19
-16.86
-35.84
2.9
10.26
-25.13
7.02
2.63
7.86
8.81
8.95
3.9
8.55
-17.2
10.99
0.22
4.14
-22.59
5.02
8.15
8.32
6.19
-18.45
-29.53
-13.14
-36.47
9.58
-19.6
8.8
6.69
6.77
8.63
2.67
-27.87
-18.64
-24.36
-1.96
4.33
-24.22
-34.14
-22.19
9.78
-12.5
8.12
7.16
7.2
3.89
7.43
4.41
-29
-40.27
7.23
-22.18
-26.89
0.76
1.71
5.65
-11.02
7.22
6.22
9.1
4.5
8.52
6.49
-21.83
-0.44
-20.13
-21.58
4.76
-24.9
-31.19
-35.89
10.09
-16.17
-26.62
8.73
-20.89
5.5
-11.04
10.22
6.85
8.38
-37.59
-15.74
4.42
6.21
-15.85
-36.56
9.71
3.48
-6.1
-15.32
7.91
-25.88
10.49
-37.15
4.83
-33.86
6.4
6.61
5.62
6.91
4.79
4.79
5.27
4.73
6.14
5.97
-2.98
6.8
4.04
-5.85
-8.49
6.8
6.68
-24.11
2.75
-4.21
5.02
-6.6
-29.56
7.11
0.54
-19.62
-13.61
-34.57
4.88
-24.83
-6.25
-23.4
2.96
3.95
-5.84
-45.12
-25.83
5.81
7.75
7.89
3.34
2.24
-18.62
-22.02
6.81
-12.78
-6.52
-3.74
3.66
4.34
-16.49
-35.08
3.49
-13.65
-27.66
11.04
-23.15
-13.03
2.63
-36.65
9.3
7.37
-16.54
10.72
10.21
-14.55
6.38
3.81
5.79
5.23
4.32
3.27

## Sheet: A3ss_2nd3ss
ctrl	ACs	ATCs	AOCs	tDASGs	oDASGs
8.05	6.96	7.76	6.96	-24.07	8.87
2.84	-38.71	3.86	-38.71		8.56
1.18	9.4	-10.31	9.4		-19.51
9.39	-22	-1.63	-22		6.15
7.16	-4.43	-34.78	-4.43		-0.18
-24.39	-4.6	-27.77	-4.6		3.26
-27.23	-1.63	2.25	-1.63
-3.79	6.15	5.55	6.15
-11.01	-19.6	8.77	-19.6
-34.57	5.96	6.57	5.96
-5.52	3.79	-6.29	3.79
0.83	8.28	9.06	8.28
0.87	-31.96	8.09	-31.96
-22.43	-30.17	-33.86	-30.17
4.85	-19.51	10.18	-19.51
-22.35	7.52	-4	7.52
-7.57	-17.15	-24.07	-17.15
7.8	-28.63	-38.3	-28.63
6.96	6.75	-1.91	6.75
-9.91	-20.7	4.56	-20.7
-9.83	5.9	-0.31	5.9
-14.6	-24.07	-11.32	-24.07
-18.88	-8.41	8.87	-8.41
-19.75	4.06	-19.77	4.06
7.11	6.36	-18.88	6.36
-11.96	-31.66	-6.72	-31.66
0.49	8.87	8.17	8.87
4.48	8.56	7.31	8.56
7.76	-27.68	-10.23	-27.68
-6.82	4.6	3.18	4.6
3.86	-2.12	10.73	-2.12
8.73	5.33	4.7	5.33
-7.72	-17.39	-16.81	-17.39
-11.33	-18.82	-14.09	-18.82
-20.82	-31.09	-22.72	-31.09
-5.56	-23.28	-18.21	-23.28
-15.87	-21.84	8.27	-21.84
-19.19	5.8	2.16	5.8
-21.75	-25.45	8.08	-25.45
-21.83	4.36	-24.06	4.36
8.79	4.82	-8.42	4.82
-8.04	-9.9	6.67	-9.9
-38.71	-4.1	3.41	-4.1
3.69	-0.07	2.33	-0.07
9.4	3.52	-17.69	3.52
5.63	7.54	-2.05	7.54
-9.13	2.75	5.32	2.75
-21.56	-17.39	-19.83	-17.39
-6.67	8.15	-20.94	8.15
-12.78	5	0.49	5
-15.97	4.74	2.81	4.74
-18.07	-0.73	-34.64	-0.73
-13.71	3.63	-25.27	3.63
9.06	-15.49	-28.69	-15.49
-11.71	2.1	8.97	2.1
-22	-30.29	0.06	-30.29
4.81	-20.06	3.52	-20.06
5.17	-13.5	3.47	-13.5
-22.33	2.3	-53.02	2.3
8.55	7.33	-23.74	7.33
5.07	-22.56	8.85	-22.56
-4.43	-0.18	8.32	-0.18
-14.32	-14.96	5.32	-14.96
-40.2	0.11	-21.93	0.11
8.54	-24.44	2.11	-24.44
-4.6	-25.23	-14.86	-25.23
-8.3	3.26	-30.12	3.26
-36.75	0.26	4.02	0.26
-36.41	8.94	-10.49	8.94
4.78	3.74	2.94	3.74
-29.1	-17.69	7.04	-17.69
-13.23	-27.04	-14.28	-27.04
-35.06	5.67	-8.91	5.67
0.26	-12.03	5.5	-12.03
-1.63	1.66		1.66
-17.88	8.9		8.9
-9.82	-10.35		-10.35
-21.07	7.86		7.86
-25.5	-7.98		-7.98
-0.43	-22.46		-22.46
2.58	0		0
8.94	9.08		9.08
4.61	-43.9		-43.9
6.24	9.98		9.98
-17.84	9.25		9.25
8.76	-11.55		-11.55
-9.83	5.01		5.01
6.27	4.27		4.27
3.7	-31.73		-31.73
6.26	-14.82		-14.82
5	-18.72		-18.72
-26.59	3.47		3.47
6.01	5.48		5.48
2.39	4.81		4.81
-6.64	-9.61		-9.61
-4.96	4.28		4.28
2.21	-32.69		-32.69
7.85	-28.38		-28.38
-38.19	-16.97		-16.97
-28.18	8.63		8.63
6.15	-18.14		-18.14
5.41	5.32		5.32
4.57	-19.39		-19.39
8.83	4.69		4.69
4.7	2.59		2.59
-17.2	8.87		8.87
4.12	-0.89		-0.89
5.77	-21.4		-21.4
7.48	6.43		6.43
6.14	-25.46		-25.46
-15.12	-28.25		-28.25
-18.17	5.45		5.45
-34.78	-25.48		-25.48
-2.95	-2.95		-2.95
-3.69	-22.79		-22.79
1.84	7.76
7.17	3.86
1.53	-10.31
-27.77	-1.63
-21.8	-34.78
3.74	-27.77
-4.62	2.25
10.16	5.55
1.09	8.77
1.13	6.57
3.35	-6.29
-34.38	9.06
4.54	8.09
5.22	-33.86
1.14	10.18
8.47	-4
4.33	-24.07
2.25	-38.3
-21.92	-1.91
-4.7	4.56
-28.35	-0.31
5.11	-11.32
8.34	8.87
1	-19.77
10.16	-18.88
-13.18	-6.72
-17.92	8.17
-28.98	7.31
4.58	-10.23
4.96	3.18
-25.45	10.73
-23.04	4.7
5.96	-16.81
-24.97	-14.09
6.55	-22.72
-0.52	-18.21
5.89	8.27
-22.54	2.16
6.9	8.08
-14.73	-24.06
5.95	-8.42
5.84	6.67
-16.07	3.41
0.74	2.33
3.56	-17.69
-20.23	-2.05
-12.44	5.32
3.79	-19.83
-13.07	-20.94
-15.43	0.49
8.11	2.81
1.73	-34.64
2.24	-25.27
8.14	-28.69
9.31	8.97
-18.25	0.06
2.45	3.52
5.55	3.47
1.28	-53.02
5.79	-23.74
5.13	8.85
-28.48	8.32
7.51	5.32
2.87	-21.93
8.77	2.11
7.36	-14.86
-20.93	-30.12
-1.8	4.02
0.32	-10.49
6.61	2.94
8.28	7.04
-25.52	-14.28
-1.45	-8.91
5.2	5.5
-23.22
-23.28
-29.7
-20.86
4.4
6.64
5.58
7.06
8.08
6.37
-31.96
6.57
5.14
-1.82
-31.91
5.76
7.8
4.74
3.39
-34.24
1.39
2.75
9.65
2.99
-4.16
5.18
-12.63
-31.3
8.31
-3.68
-4.55
5.49
7.38
1.36
10.86
-25.79
-11.66
12
4.62
5.43
-7.19
6.5
7.45
0.68
-19.19
-30.17
-6.29
8.21
-12.86
3.59
10.26
5.74
6.99
-7.26
-30.35
-28.08
-35.59
9.25
9.81
-15.1
9.06
9.49
8.09
6.12
10.52
-18.36
6.28
-8.93
-22.07
7.95
4.85
5.1
1.05
-14.73
-33.86
-31.85
-22.71
-22.58
6.71
10.42
7.52
9.16
5.82
6.35
-6.38
-21.37
5.89
-28.56
-7.7
-23.79
-17.15
-11.18
-28.63
1.11
5.38
-0.73
-0.48
6.31
6.55
6.12
7.87
-21.98
-20.07
-10.54
6.14
6.55
-17.14
-18.55
-10.64
5.21
-24.05
1.21
-33.12
6.75
2.96
-10.4
-20.7
-20.17
-38.29
10.18
-20.55
6.7
6.65
5.9
9.08
-11.71
-41.44
-4
-24.01
-1.71
-38.3
3.78
3.33
5.8
-0.8
-23.44
5.39
6.9
-29.13
4.21
-31.6
11.69
-16.18
6.75
-19.12
-31.79
-1.91
2.17
-8.41
7.87
-31.95
-18.84
10.65
6.78
3.12
-35.52
3.26
4.06
-36.41
4.56
3.88
6.94
9.97
-13.65
-9.92
4.83
-15.61
-10.96
7.9
5.82
-17.92
5.3
2.76
-34.44
-24.3
5.98
6.01
6.06
6.32
2.01
1.28
3.74
-23.83
-8.49
-17.81
6.41
-1.92
-0.31
8.88
-15.72
-17.42
-0.82
0.14
6.36
-7.92
-23.8
-14.89
-7.09
5.71
-28.72
-21.72
6.04
5.61
1.74
-14.8
4.13
11.1
-26.16
-15.88
-15.23
-31.45
-25.03
-22.8
-6.21
-11.32
-9.95
-23.42
-20.22
-11.89
-5.69
-31.45
-23.52
-18.84
-39.29
-36.79
10.45
6.5
-9.28
-23.85
-12.87
-11.62
8.87
8.56
5.33
3.44
-1.57
-9.42
5.51
3.63
9.07
3.61
-30.43
-5.23
5.74
-27.68
-25.24
3.04
2.3
8.55
3.39
4.6
-13.34
6.45
1.97
-2.12
2.46
7.03
6.5
5.36
-14.89
5.07
9.93
-13.34
-7.79
-23.34
-18.96
4.62
-11.56
-1.88
-32.9
6.68
12.61
8.44
-19.57
3.81
1.12
5.01
5.17
-20.94
5.33
4.04
2.3
5.06
-24.08
-4.15
6.26
-17.39
6.71
-28.29
-0.99
2.83
-19.77
2.64
4.44
-29.08
-35.28
-8.11
-22.77
10.17
1.57
-21.88
-18.82
-15.37
-15.1
-39.77
9.09
-31.09
-23.28
1.2
9.23
-3.43
-18.88
-5.41
10.57
1.74
8.22
2.13
-27.11
-18.86
6.22
4.45
-27.58
3.39
3.27
5.23
-31.23
-37.48
-21.84
0.28
2.37
-0.69
-16.87
-13.39
-2.8
5.8
3.47
4.82
8.5
-6.72
-16.55
6.1
-28.24
-6.36
-0.22
-5.63
4.04
-2.13
2.96
5.09
5.39
9.14
-20.44
5.13
2.28
3.27
12.28
0.29
-6.01
8.17
0.09
-13.38
-11.93
-17.79
-21.37
3.26
7.31
4.01
-13.73
-25.13
-7.54
-21.83
-5.05
3.75
3.02
3.79
3.71
8.85
5.32
9.23
8.78
2.12
7.27
-10.23
-6.07
-30.09
-32.12
-25.45
5.8
-7.72
4.85
4.36
4.82
5.23
5.95
-22.44
-28.2
7.09
1.77
-14.44
2.9
4.32
-15.11
1.72
-16.97
-6.05
6.51
3.87
-6.86
4.14
-9.9
-19.3
-15.93
-21.29
-24.14
-4.1
-0.07
-17.01
2.39
3.27
4.84
4.77
-3.85
8.79
-0.38
-3.56
-32.92
8.24
9.74
3.35
10.64
5.35
2.1
-8.44
-14.23
3.52
7.54
5.52
-38.85
-26.64
-12.66
3.18
2.75
10.73
5.21
-18.49
-0.74
7.24
5.83
-7.19
-13.09
4.7
1.06
-16.81
1.41
0.23
8.69
-11.5
-17.39
8.15
-32.3
7.68
7.53
-21.02
-30.2
11.41
-5.18
-23.53
-6.46
7.82
10.68
1.82
2.74
8.86
-18.48
-18.77
8.8
-19.57
7.14
-5.43
-21.59
-19.93
2.35
-5.33
-1.74
-15.23
9.74
-1.98
7.87
2.75
-11.4
-6.96
5
1.69
-12.21
-27.74
4.74
-30.21
-18.41
-23.66
6.22
1.33
-4.93
0.72
-5.18
5.43
2.49
5.13
3.22
-28.72
-12.43
-28.47
5.93
-46.17
-17.59
-11.4
-0.73
7.87
-27.57
4.57
-12.53
-22.75
2.81
-22.72
5.22
3.63
-33.29
-32.51
-30.83
-10.02
-28.24
-18.21
-26.57
6.87
8.05
-32.74
6.76
11.31
-3.14
-18.02
-17.87
7.78
2.56
-11.85
5.96
5.31
4.65
3.42
1.39
-23.51
11.09
4.97
8.27
5.41
2.02
-6.53
1.49
-16.71
-24.77
-7.71
-20.17
3.38
1.13
-0.04
5.5
-42.98
7.19
-0.57
-24.26
-7.89
-15.49
2.11
2.1
0.99
3.23
-30.29
4.06
-25.35
3.95
-14.04
5.04
-27.75
0.72
-21.79
1.41
4.54
4.73
9.24
-29.49
-33.17
-16.07
5.38
-22.52
-11.6
-48.24
-16.76
-7.81
-13.77
-23.22
-20.06
1.57
6.15
-16.66
-28.41
-0.21
-5.15
-21.4
1.57
-14.37
-13.5
-20.43
5.75
2.3
-27.3
-33.22
-14.95
-17.34
-15.92
-13.67
-22.53
-14.57
-12.33
-7.98
-24.45
-19.54
-50.63
-22
5.44
4.91
6.31
-14.22
4.52
5.13
2.16
-11.67
-4.55
-10.58
6.24
6.55
8.08
8.7
-0.36
-23.7
5
-3.86
2.74
-15.51
7.06
7.33
-15.98
-22.56
6.29
0.71
3.87
-0.81
1.16
3.4
3.6
4.59
7.63
-1.15
5.39
-3.98
-31.25
5.34
-7.88
-30.61
-22.71
3.11
-11.29
-8.05
6.42
-14.96
-23.56
6.6
-1.12
6.27
-26.11
3.93
7.31
4.68
8.49
0.69
-0.29
4.53
-20.81
-33.71
3.91
9.08
8.56
-10.15
-4.47
-22.05
3.41
1.08
-5.68
-19.57
-18.84
2.12
1.14
-3.88
6.72
-34.79
-6.02
-2.71
4.37
6.08
4.25
6.51
-14.81
-20.92
0.22
0.2
-18.35
-21.16
-37.82
7.28
1.09
2.77
-27.09
-22.53
-4.47
-11.63
8.36
8.79
3.66
5.06
-18.08
-44.44
-24.06
-20.89
6.08
-1.58
-21.4
5.18
-27.05
3.4
5.41
0.11
-0.38
8.51
-16.1
4.32
3.99
11.15
-19.78
7.1
-23.35
-24.26
-26.74
8.34
8.52
0.41
0.07
-24.44
-27.78
-14.92
-25.23
-4.41
-21.03
1.47
-26.95
-3.18
9.29
-28.59
3.61
-8.42
-10.61
-1.14
8.87
5.96
6.64
-2.92
-14.88
-15.61
-2.01
4.56
-32.3
4.43
-39.72
-16.49
2.62
0.26
3.9
5.76
5.84
-17.74
-11.1
1.58
9.51
9.28
5.91
3.41
-31.09
2.33
-5.19
7.22
4.24
6.26
-15.6
8.94
11.36
-0.2
8.5
6.84
-1.81
1.06
4.62
3.41
3.74
-17.69
3.77
5.41
-16.6
2.83
4.05
-13.78
-8.88
-17.87
9.21
-15.12
5.37
4.49
5.84
-27.04
5.67
-5.44
-15.28
7.09
4.85
-26.23
-2.05
1.96
-13.48
-14.6
-22.05
-3.25
-15.36
-31.85
-0.2
1.29
-19.05
-21.79
1.7
-3.45
-36.41
-12.03
1.56
8.65
4.79
-19.53
-16.52
0.58
1.66
4.6
8.3
1.53
10.11
8.9
6.93
-18.01
7.67
8.3
-3.47
3.45
2.4
-10.35
-16.15
5.32
3.65
3.9
-32.99
-27.73
7.26
-12.99
-2.06
4.03
5.37
9.25
9.25
-9
6.46
-44.29
1.5
7.93
5.38
8
-19.83
-7.58
4.53
6.47
6.55
1.15
3.63
7.86
6.19
4.27
-7.98
-16.75
7.48
7.17
4.25
7.98
9.92
-20.94
-19.66
5.4
-8.29
0.87
-25.25
5.98
3.89
1.22
6.38
4.9
-18.16
6.03
8.65
5.19
-12.8
-16.63
-2.77
-11.69
5.14
10.29
-24.23
-0.2
-10.61
6.1
-22.46
3.77
0
9.08
7.59
3.41
3.33
-0.91
0.49
5.45
-43.9
-2.02
-1.81
-20.93
-3.13
-13.14
-0.84
2.81
-31.04
-39.33
-20.79
-14.72
-16.6
3.7
9.98
-25.98
5.05
3.63
5.03
-19.55
-19.08
5.27
-34.64
3
3.44
5.12
-30.26
5.95
-25.81
9.25
-11.55
-40.15
6.29
4.89
8.64
-7.71
-27.73
5.92
1.45
-20.56
5.12
-35.93
-12.88
-39.19
4.58
2.08
-28.69
-24.68
-10.6
4.75
-35.4
-13.7
11.77
3.07
-11.35
1.86
-20.57
-18.94
-27.94
5.3
-35.17
5.01
-5.34
6.42
2.63
3.12
1.5
6.66
-39.92
4.27
4.66
8.97
-14.23
-36.45
6.53
-8.5
2.59
7.11
5.8
-23.12
-9.4
0.06
7.06
3.12
-11.56
-27.96
3.52
2.06
4.43
4.22
-12.28
3.89
1.1
-0.27
-34.68
-31.73
8.07
4.15
4.61
-0.24
-40.31
-29.66
-14.82
-22.26
-19.51
-22.06
3.07
5.04
1.77
9.17
8.55
4.18
6.47
7.54
-18.72
3.47
-20.19
2.25
4.39
-29.03
4.34
-25.05
8.95
5.48
-11.05
0.54
-19.7
9.45
-37.15
5.86
4.52
6.66
5.46
-53.02
-19.15
-20.5
-44.15
-32.42
-31.04
-16.5
-27.22
0.79
3.01
-19.32
-11.07
8.94
-19.59
10.86
4.31
5.6
6.26
-8.58
-10.53
-6.84
2.85
-14.86
2.42
6.45
-30.13
10.05
-25.24
7.26
7.04
4.35
-15.42
-18.46
-19.71
-14.32
-20.3
-37
8.73
4.81
-20.19
-18.16
-3.69
2.56
2.82
4.14
-21.86
-20.04
-9.61
-14.64
-6.74
-16.81
7.22
3.84
-28.79
2
-19.65
10.97
11.01
-29.82
-27.68
3.38
4.61
-5.23
-41.06
-16.54
-4.33
-8.24
-7.51
-0.61
4.28
-32.69
6.41
6.75
6.84
-16.76
-21.17
8.14
-28.01
2.11
7.43
-17.25
-23.3
-3.05
-32.09
-16.16
4.2
-2.43
7.56
10.03
-15.53
7.28
6.56
1.98
3.44
-19.11
9.31
4.79
-16.66
6.94
-17.1
-25.08
-30.46
6.67
4.14
-3.59
3.37
4.55
-7.42
-25.98
-16.63
-20.05
-17.49
3.59
5.11
1.78
-4.13
-1.88
3.15
9.85
3.92
-11.86
3.25
3.71
10.47
-23.74
-29.13
6.99
5.54
-28.38
-25.25
-5.56
3.23
-1.6
-20.06
-25.97
-1.81
2.6
4.25
5.33
-16.97
-20.57
7.99
9.53
5.22
3.81
3.95
2.66
-23.98
-21.82
-23.1
-23.1
-23.1
3.37
-35.27
5.02
1.97
-20.68
10.14
-14.12
-9.88
-3.61
10.6
8.63
7.63
9.29
8.51
4.44
8.85
3.79
-21.28
-26.68
9.03
6.72
3.53
8.91
-11.02
1.74
5.53
-27.29
-14.11
-4.33
-16.12
-13.34
7.31
7.28
6.9
4.54
6.98
11.52
3.18
-4.77
-2
-16.63
-21.26
4.98
5.88
9.55
8.93
-6.06
1.57
-2.57
-15.29
8.32
-18.14
-27.65
-22.04
9.48
-11.93
-5.09
5.31
-23.01
5.32
-2.54
5.31
4.89
-19.39
-18.63
-18.13
-5.5
5.46
2.28
-1.6
5.23
5.31
7.85
-14.96
-40.64
-21.97
-9.26
3.28
-0.43
11.26
0.51
-11.77
-16.9
8.36
5.41
4.87
-0.62
6.68
-20.08
3.03
5.78
8.08
4.08
4.69
0.47
-14.44
-1.34
-12.77
-11.19
-32.5
0.14
-18.58
5.14
-21.93
-26.21
-5
2.59
-3.39
7.41
6.27
4.83
-38.78
-23.3
-42.45
2.12
1.12
-24.52
-2.79
-20.3
3.27
5.23
5.45
2.44
8.59
5.98
8.39
2.87
3.61
9.97
7.15
8.87
4.29
2.05
-2.11
7.91
2.11
-46.97
-38.35
9.8
-23.11
8.4
-1.66
8.79
1.2
4.09
3.03
-13.14
7.68
0.82
6.85
-22.77
6.88
-23.51
6.92
-0.89
9.55
-12.57
-32.24
-31.56
1.94
-14.55
-21.1
-16.31
-30.06
-23.09
2.09
7.43
9.28
-21.9
-21.4
5.77
6.38
0.2
-12.66
-6.66
-6.67
-18.09
-1.98
5
-15.47
-14.7
10.47
5.17
3.04
-14.6
7.73
4.91
6.13
5.07
1.67
6.43
-34.46
-23.85
4.02
-14.86
4.97
1.5
0.54
-6.82
-25.46
-43.2
-30.12
-12.37
5.23
4.02
2.44
-17.87
2.47
-13.75
1.77
8.13
6.21
10.42
6.52
-24.18
12.82
-26.46
-18.64
-21.51
5.24
3.61
-1.03
-30.68
-45.46
-21.12
-21.72
-18.89
6.86
5.23
3.78
8.81
-24.73
-25.77
-20.65
-32.82
3.75
9.12
6.6
2.88
-41.31
-5.91
-13.72
5.94
-34.06
-19.61
-33.31
10.26
6.41
-13.6
6.51
3.23
5.28
-11.55
8.42
-0.82
4.89
-10.49
9.52
1.68
6.39
-9.53
6.61
-0.68
8.71
3.27
-15.84
-35.79
-28.25
-16.38
8.96
-9.44
3.71
-0.73
6.93
7.1
5.45
-10.98
-26.17
-17.85
6.19
5.49
-25.48
-20.65
-9.2
5.31
-21.25
7.2
4.88
8.7
1.45
6.99
-1.68
-6.92
-17.65
4.42
-12.67
-14.83
-7.51
5.65
2
-19.17
5.47
8.46
-2.95
2.94
6.92
7.04
-21.12
3.55
-6.22
-20.85
10.87
-14.28
-36.32
-4.76
7.05
-20.36
-25.87
6.85
-13.82
5.05
-22.79
6.58
4.55
-0.1
-42.16
-21.09
4.49
3.39
-26.86
-27.19
3.48
9.11
-4.7
-24.05
3.79
-16.6
7.26
-27.73
1.75
5.3
-0.95
6.91
6.3
6.97
6.97
3.38
0.44
-4.33
6.84
-32.09
6.42
8.64
-20.92
-21.97
5.41
-12
-11.87
0.53
-4.85
5.57
-19.99
-18.24
1.18
10.45
-17.84
-34
-29.15
6.61
-23.58
-19.74
-25.78
4.8
1.74
-7.79
-15.11
-30.65
2.96
6.87
5.09
5.39
4.42
-16.81
-20.91
4.31
-16.1
-2.92
5.64
1.22
6.38
-19.1
-37.81
6.22
-10.87
-25.51
10.16
-8.91
-8.67
3.23
-40.08
4.96
5.3
-24.14
4.84
7.14
-20.04
2.81
5.5
4.67
4.32
3.99
6.48

## Sheet: ES_3ss
ctrl	ACs	ATCs	AOCs	tDASGs	oDASGs
4.51	-42.06	6.25	-42.06	-24.12	7.81
9.29	-18.42	7.58	-18.42	-8.45	7.36
11.2	5.94	4.15	5.94	4.44	9.3
9.68	13	7.58	13	9.48	5.94
9.2	7.06	5.5	7.06	10.18	-27.25
7.2	10.58	12.68	10.58	6.22	-31.26
8.75	-46.4	6.22	-46.4	-15.17	-17.22
8.39	-18.85	10.18	-18.85	-22.21	-36.63
10.84	-22.35	-20.64	-22.35	-17.93	-29.74
8.35	-18.33	-13.13	-18.33	-28.45	-8.59
12.55	-38.4	-27.6	-38.4	-12.22	8.56
9.35	-22.48	-16.99	-22.48	-21.61	7.11
8.79	-10.13	7.68	-10.13	-22.42	-12.02
9.97	-31.53	5.05	-31.53	-36.17	-9.84
-21.78	-20.28	1.75	-20.28	-18.28	15.39
-36.48	-17.9	6.49	-17.9	-24.37	7.95
-17.34	-24.81	4.51	-24.81	-34.15	5.03
-19.34	-11	7	-11	-18.35	8.01
-9.01	8.44	8.8	8.44	7.58	8.42
5.62	4.51	6.08	4.51	7.98	1.15
10.37	10.18	-29.94	10.18	4.54	-24.34
8.05	11.67	-26.73	11.67	4.65	-37.27
10.38	-22.34	10.31	-22.34	4.88	11.29
-27.26	-9.25	10.46	-9.25	10.16	7.05
-19.4	-17.38	3.74	-17.38	7.76	-29.88
-4.64	-12.6	8.08	-12.6	10.57	-21.17
11.85	8.29	-20.26	8.29	7.4	10.38
6.77	8.97	-38.23	8.97	5.99	5.49
8.63	-21.88	11.1	-21.88	-7.3	-21.05
6.36	-27.62	8.11	-27.62	-16.7	-27.16
11.61	0.86	-42.56	0.86	4.92	7.82
8.65	-11.45	-17.7	-11.45	9.19	4.8
9.5	-32.24	-26.55	-32.24	-38.42	4.51
-31.45	-25.09	-19.98	-25.09	-24.91	8.44
7.73	-28.76	-18.28	-28.76	8.76	6.15
7.81	-29.92	-4.6	-29.92	4.15	9.32
-15.9	3.06	-24.37	3.06	5.55	-28.63
-26.32	6.16	-34.15	6.16	8.17	-25.44
-20.96	4.13	-18.35	4.13	6.85	7.73
-37.57	7.28	-21.3	7.28	5.34	10.13
-32.77	-19.39	-17.1	-19.39	-26.83	-17.26
-13.65	6.76	-36.75	6.76	-19.43	-25.77
10.18	9.41	-15.37	9.41	-23.23	11.51
12.64	1.85	-16.63	1.85	-29.21	4.72
2.86	-3.89	-13.18	-3.89	-15.05	2.87
6.39	-3.75	-25.5	-3.75	-31.79	8.59
-12.38	-20.66	-10.38	-20.66	12.67	5.74
-35.5	-14.94	-22.01	-14.94	6.81	1.98
-22.24	4.76	-25.78	4.76	6.03	-24.36
-11.19	4.79	-20.66	4.79	5.49	-31.59
-19.56	9.32	-14.94	9.32	9.24	2.66
7.63	8.6	-11.99	8.6	8.47	5.19
8.61	6.15	-13.89	6.15	3.61
9.8	-17.39	-27.47	-17.39	4.09
7.37	-14.99	-18.11	-14.99	-14.74
5.61	8.95	5.69	8.95	-28.14
7.88	-29.05	9.06	-29.05	-29.64
4.44	-17.5	4.76	-17.5	-12.89
6.24	8.31	4.79	8.31
-18.3	3.17	3.3	3.17
-23.22	10.3	3.17	10.3
-28.76	9.25	10.08	9.25
-19.21	11.75	8.96	11.75
-12.43	-20.67	-14.14	-20.67
-17.05	-28.84	-28.79	-28.84
-42.06	-11.76	-26.29	-11.76
-18.42	-29.82	-4.74	-29.82
9.22	8.77	-29.39	8.77
5.22	9.88	-41.18	9.88
6.65	-17.26	-27.15	-17.26
9.41	-25.77	-57.8	-25.77
-37.36	5.8	-17.26	5.8
-8.7	10.64	-23.79	10.64
-20.47	-15.4	6.17	-15.4
-22.27	-26.88	8.21	-26.88
-5.12	-15.51	0.86	-15.51
-28.55	-10.31	9.5	-10.31
11.42	7.61	5.79	7.61
7.94	11.67	10.13	11.67
12.01	7.05	13.64	7.05
-19.22	8.05	7.41	8.05
8.27	-23.64	10.47	-23.64
6.42	-29.66	9.91	-29.66
5.1	9.21	5.78	9.21
7.63	10.66	10.91	10.66
5.57	9.64	-36.99	9.64
-26.25	9.05	-41.45	9.05
6.13	-39.71	-14.91	-39.71
9.4	-22.88	-22.94	-22.88
6.5	-33.39	-20.65	-33.39
6.25	-26.31	-32.6	-26.31
7.58	4	3.13	4
-26.07	6.66	9.67	6.66
-29.64	9.91	7.98	9.91
10.93	5.57	6.81	5.57
9.67	-18.99	-22.52	-18.99
-23.68	-2.85	-20.19	-2.85
-23.18	-0.59	9.85	-0.59
9.62	5.35	8.78	5.35
8.42	-12.75	9.56	-12.75
-9.7	-14.06	5.31	-14.06
9.75	-5.13	10.35	-5.13
11.02	-17.69	8.92	-17.69
9.76	8.02	5.35	8.02
-26.62	10.42	9.88	10.42
-18.48	2.42	-27.1	2.42
8.78	-25.46	-23.63	-25.46
7.04	-17.95	-29.62	-17.95
5.94	-5.69	-6.88	-5.69
13	-35.21	4.89	-35.21
-5.29	-16.76	12.65	-16.76
-2.09	-20.83	6.3	-20.83
-5.67	-39.73	10.08	-39.73
-14.34	-16.69	8.44	-16.69
-41.1	-14.3	9.47	-14.3
12.9	-14.74	-34.79	-14.74
12.72	-30.66	-12	-30.66
-2.31	-30.86	-19.32	-30.86
-19.1	-8.82	-27.33	-8.82
11.43	9.58	9.28	9.58
7.48	7.95	11.07	7.95
-27.07	6.71	4.5	6.71
-16.62	-31.65	5.43	-31.65
-26.92	-9.86	10.18	-9.86
-31.26	4.06	9.31	4.06
-16.47	5.36	-38.42	5.36
7.06	2.45	-24.91	2.45
10.58	12.08	-37.11	12.08
4.99	-14.73	1.15	-14.73
9.5	-17.22	9.84	-17.22
-29.52	-28.63	10.42	-28.63
-24.43	-25.44	-30.04	-25.44
-15.3	-19.48	-23.65	-19.48
-11.12	-19.23	10.15	-19.23
-15.61	10.15	5.81	10.15
-20.97	6.85	-19.02	6.85
-11.62	9.09	-28.49	9.09
-15.64	7.03	2.28	7.03
-17.43	-11.1	10.28	-11.1
-21.49	-12.99	-19.13	-12.99
-5.93	4.23	-5.58	4.23
9.29	11.07	-15.05	11.07
11.88	8.28	-31.79	8.28
2.86	8.87	-7.22	8.87
9.78	8.35	-13.95	8.35
12.03	13.63	-20.7	13.63
5.76	-17.65	-10.65	-17.65
8.05	-9.46	-20.42	-9.46
-26.52	8.16	-19.8	8.16
-34.7	11.19	-4.06	11.19
-19.99	-19.9	-26.45	-19.9
-27.58	-25.19	-22.72	-25.19
-16.92	13.06	-13.77	13.06
-21.1	11.83	-14	11.83
-9.66	-35.29	-19.19	-35.29
-25.42	-33.43	-2.6	-33.43
-29.01	5.03	2.95	5.03
-12.34	2.94	10.11	2.94
-19.38	-18.82	11.87	-18.82
-9.41	-19.37	9.5	-19.37
-17.12	-17.76	-40.5	-17.76
-32.37	-6.13	-39.79	-6.13
-19.03	8.53	7.52	8.53
-7.12	8.15	7.65	8.15
7.56	7.14	3.58	7.14
10.91	10.36	3.68	10.36
-20.42	-23.65	10.12	-23.65
-39.13	-26.74	-6.07	-26.74
10.3	-45.06	-21.44	-45.06
9.55	-40.21	-26.95	-40.21
6.54	10.36	-5.16	10.36
5.8	8.18	9.23	8.18
-3.87	8.55	6.22	8.55
9.29	7.91	-16.05	7.91
8.36	-13.23	-8.19	-13.23
2.86	-18.69	5.92	-18.69
3	-21.79	7.51	-21.79
6.31	-18.73	-22.95	-18.73
4.16	-10.81	-12.54	-10.81
6.64	-21.91	10.78	-21.91
-19.93	-19.25	7.63	-19.25
-31.26	-10.6	6.67	-10.6
-21.63	11.75	8.02	11.75
-40.03	12.37	5.52	12.37
-29.58	-17.24	10.33	-17.24
-7.01	-38.24	-20.58	-38.24
-12.07	1.15	-14.42	1.15
2.45	8.42	-22.28	8.42
-11.5	7.11	-7.93	7.11
-27.17	8.56	-13	8.56
-16.06	8.01	-18.19	8.01
-14.53	5.03	-40.43	5.03
11.68	-36.24	7.37	-36.24
11.91	-22.71	4.94	-22.71
12.72	-32.67	-19.8	-32.67
-42.83	-28.58	-33.94	-28.58
-25.43	-33.97	-27.81	-33.97
-10.01	-32.44	-19.9	-32.44
-12.33	-22.36	-37.58	-22.36
-5.62	-22.7	-39.25	-22.7
-26.19	1.92	-50.4	1.92
-33.5	6.88	-8.88	6.88
-19.15	-31.15	-17.1	-31.15
-13.98	-37.65	-15.06	-37.65
-17.08	-33.82	-30.29	-33.82
-31.75	-22.52	-25.88	-22.52
-9.16	-27.13	-9.58	-27.13
-23.09	-14.59	-9.05	-14.59
-20.6	5.54	5.11	5.54
9.11	6.11	5.39	6.11
12.68	-24.36	9.93	-24.36
8.27	-14.67	10.58	-14.67
11.08	8.81	9.87	8.81
9.64	7.29	-14.15	7.29
3.66	7.95	-10	7.95
11.55	15.39	-0.97	15.39
10.41	4.72	-40.73	4.72
6.82	11.51	7.31	11.51
6.78	-14.26	11.19	-14.26
10.35	-21.11	7.28	-21.11
13.3	-2.24	7.64	-2.24
7.8	12.55	12.02	12.55
10.07	11.03	11.69	11.03
10.47	8.94	7.28	8.94
10.51	8.47	-12.11	8.47
6.21	8.78	-13.02	8.78
8.22	10.4	-23.23	10.4
-19.81	9.7	-29.21	9.7
6.83	3.07	-21.09	3.07
-13.45	-33.7	-28.71	-33.7
11.68	-10.35	8.12	-10.35
4.15	9.1	10.51	9.1
7.58	3.82	-25.67	3.82
7.29	-36.18	-14.82	-36.18
8.44	-30.15	-17.9	-30.15
8.37	-7.44	-5.08	-7.44
4.88	-22.98	5	-22.98
-38.66	10.43	10.95	10.43
-22.99	6.41	6.75	6.41
-22.38	7.21	9.73	7.21
-24.94	4.7	10.01	4.7
-29.1	5.67	7.06	5.67
-11.78	8.31	2.21	8.31
-20.43	2.13	11.39	2.13
-8.2	4.65	-8.49	4.65
-4.83	8.15	-18.58	8.15
8.63	6.91	-30.22	6.91
10.67	1.85	-21.32	1.85
7.26	-18.88	10.42	-18.88
7.18	-25.6	9.99	-25.6
9.14	8.74	-17.33	8.74
5.51	11.19	-45.06	11.19
8.2	10.13	-27.48	10.13
-15.71	7.73	-30.11	7.73
-22.44	7.31	5.62	7.31
-20.55	4.73	12.3	4.73
-20.21	-29.27	-33.14	-29.27
3.28	-24.98	-13.15	-24.98
8.8	-31.78	5.47	-31.78
8.82	-25.78	8.18	-25.78
5.5	-32.26	-23.71	-32.26
12.68	-4.67	-33.47	-4.67
10.37	7.94	-23.46	7.94
11.81	0.24	-20.35	0.24
12.07	10.88	-37.14	10.88
12.04	7.71	-14.96	7.71
8.54	-26.66	-26.16	-26.66
11.76	-28.71	-27.37	-28.71
10.04	4.38	9.17	4.38
5.26	7.15	7.78	7.15
6.1	7.96	9.47	7.96
10.18	7.66	11.39	7.66
2.24	-25.44	-19.77	-25.44
9.97	-10.42	-8.05	-10.42
9.07	-22.28	-26.83	-22.28
10	-32.31	-19.43	-32.31
6.88	8.33	-2.8	8.33
3.99	11.01	12.83	11.01
-51.48	-20.66	6.7	-20.66
-10.4	-29.58	6.5	-29.58
-27.01	-22.36	5.82	-22.36
-24.73	-8.4	10.65	-8.4
12.37	-30.44	-18.87	-30.44
10.96	-4.17	-46.69	-4.17
6.45	5.9	-14.74	5.9
9.59	8.12	-28.14	8.12
6.22	-37.71	-7.3	-37.71
3.82	-23.6	-19.66	-23.6
-46.4	-27.25	-7.3	-27.25
-18.85	-31.26	-16.7	-31.26
10	-1.18	-17.45	-1.18
6.37	9.24	-39.51	9.24
12.36	-29.88	-17.24	-29.88
2.32	-21.17	-38.24	-21.17
9.47	-32.92	9.37	-32.92
9.9	-3.69	8.87	-3.69
11.64	-25.53	-39.71	-25.53
6.34	-37.98	-24.68	-37.98
-13.13	7	-16.35	7
-12.67	11.09	-15.09	11.09
7.26	-37.23	-9.78	-37.23
8.45	-23.62	-22.76	-23.62
11.42	-28.22	-38.96	-28.22
9.18	-21.5	-21.8	-21.5
7.47	7.35	5.49	7.35
-21.87	9.34	6.03	9.34
-22.17	3.61	-29.99	3.61
-41.16	9.99	-29.02	9.99
-10.56	-19.4	-20.65	-19.4
-16.91	-41.96	-17.44	-41.96
-40.67	7.54	-22.46	7.54
-8.96	10.43	7.34	10.43
-28.59	-6.33	8.31	-6.33
-42.03	-20.11	-5.1	-20.11
-19.66	7.94	11.79	7.94
-15.46	9.74	10	9.74
-10.39	5.92	9.49	5.92
-22.34	5.55	10.49	5.55
-42.34	-17.22	-20.69	-17.22
-24.91	-36.63	-28.94	-36.63
-21.57	9.45	-25.52	9.45
6.9	8.29	-14.35	8.29
-17.72	-17.72	-20.09	-17.72
8.8	-17.18	-10.7	-17.18
-22.45	-26.67	-11.08	-26.67
-16.51	-23.22	-41.15	-23.22
-24.93	-11.39	-11.16	-11.39
-21.35	-27.56	-23.36	-27.56
7.54	0.97	-23.22	0.97
5.52	5.19	-5.9	5.19
-22.35	2.66	8.51	2.66
-17.02	-13.5	9.48	-13.5
-18.33	-29.4	-28.8	-29.4
9.7	-23.96	-14.34	-23.96
-9.85	8.54	11.96	8.54
-12.61	9.85	8.65	9.85
-28.79	-29.74	8.54	-29.74
-13.51	-8.59	8.03	-8.59
-25.91	-24.28	-25.57	-24.28
-20.65	-24.45	-21.28	-24.45
-3.64	-25.56	8.84	-25.56
-27.93	7.9	8.44	7.9
-17.52	12.01	-27.29	12.01
-40.04	8.82	-20.56	8.82
-25.76	4.87	7.74	4.87
-18.65	8.14	7.02	8.14
-14.12	4.99	9.34	4.99
-22.8	-5.85	7.87	-5.85
-18.9	-24.34	-24.1	-24.34
-0.74	-37.27	-21.03	-37.27
11.03	6.87	9.56	6.87
6.61	5.45	12.42	5.45
5.22	13.35	-20.38	13.35
7.13	-7.28	-14.71	-7.28
11.3	-14.7	6.9	-14.7
7.23	-28.57	10.41	-28.57
7.37	-29.45	-10.28	-29.45
-38.4	3.14	-38.77	3.14
-22.48	6.03	3.34	6.03
-9.08	5.94	11.44	5.94
-41.65	9.3	5.99	9.3
-21.36	2.39	7.4	2.39
-32.41	5.81	10.37	5.81
-20.52	10.36	11.57	10.36
9.99	6.16	5.42	6.16
5.52	5.34	8.01	5.34
12.66	-13.81	-22.34	-13.81
6.78	-24.4	-12.14	-24.4
11.4	-26	-7.52	-26
7.66	-19.35	6.31	-19.35
-26.48	8.04	6.44	8.04
-27.94	2.19	5.54	2.19
11.18	1.98	9.47	1.98
5.46	7.79	-13.38	7.79
10.17	-29.19	-38.07	-29.19
10.35	-22.21	-18.76	-22.21
5.47	-24.36	3.77	-24.36
6.42	-31.59	3.87	-31.59
10.71	1.55	6.48	1.55
8.92	11.92	9.52	11.92
9.19	10.34	11.41	10.34
4.18	11.76	-35.37	11.76
9.11	4.23	-17.97	4.23
10.01	10.46	9.22	10.46
6.16	7	10.72	7
5.61	7.46	5.98	7.46
9.38	-37.51	8.03	-37.51
-11.87	0.03	3.75	0.03
-22.21	-15.97	3.34	-15.97
9.41	-33.85	7.9	-33.85
10.67	-40.49	11.29	-40.49
9.46	-34.36	5.99	-34.36
5.21	8.55	7.66	8.55
6.79	11.01	10.62	11.01
4.21	-22.12	10.73	-22.12
11	-32.51	-0.08	-32.51
9.93	5.75	-16.74	5.75
9.95	11.22	-24.74	11.22
-27.4	-13.6	-0.25	-13.6
-25.87	-34.37	-16.87	-34.37
-19.75	-22.37	-27.25	-22.37
-28.9	-46.43	7.05	-46.43
-1.67	-23.95	7.95	-23.95
-12.74	-25.28	-19.4	-25.28
10.78	-13.48	-9.52	-13.48
7.11	8.18	9.09	8.18
8.44	7.51	10.74	7.51
9.48	-30.98	5.84	-30.98
8.17	-19.75	13.45	-19.75
-25.9	-22.11	8.13	-22.11
-24.46	-32.43	10.28	-32.43
-19.54	9.72	8.16	9.72
-20.72	11.8	10.08	11.8
10.63	-19.15	8.63	-19.15
10.06	-15.34	8.13	-15.34
-4.83	4.44	-29.27	4.44
-9.61	10.55	-21.2	10.55
9.61	-8.25	-32.43	-8.25
3.33	-22.07	-37.04	-22.07
6.99	-15.34	2.58	-15.34
6.62	-12.95	6.56	-12.95
8.57	-32.64	9.34	-32.64
-1.31	-8.35	6.28	-8.35
8.28	-14.52	9.06	-14.52
6.83	-22.62	10.81	-22.62
6.99	-27.39	6.02	-27.39
-22.62	-8.2	8.24	-8.2
-10.4	9.63	10.37	9.63
-49.36	6.46	10.76	6.46
-22.85	5.77	9.78	5.77
-1.75	5.7	7.98	5.7
-32.8	8.87	7.94	8.87
-23.31	8.83	4.62	8.83
6.87	-21.05	0.24	-21.05
8.42	-27.16	10.88	-27.16
9.55	-23.87	7.71	-23.87
2.87	-20.69	2.69	-20.69
3.74	0.41	3.26	0.41
-21.58	4.91	5	4.91
-24.4	5.43	7.1	5.43
-14.28	13.17	3.5	13.17
-28.64	7.05	6.76	7.05
-36.62	9.06	10.97	9.06
-22.25	11.29	5.53	11.29
-24.58	-7.31	11.36	-7.31
9.51	-36.24	9.55	-36.24
6.53	-11.06	4.74	-11.06
-11.67	-22.26	10.07	-22.26
-42.01	-0.83	10.15	-0.83
-23.69	-29.52	11.78	-29.52
-21.7	-12.02	5.96	-12.02
11.56	-9.84	4.94	-9.84
-15.38	-20.99	-21.56	-20.99
12.12	-4.15	-6.33	-4.15
-6.75	9.23	-15.27	9.23
7.77	10.44	-13.55	10.44
9.28	8.39	7.27	8.39
-27.6	10.29	7.99	10.29
5.63	-18.68	8.64	-18.68
6.64	-9.26	9.08	-9.26
7.43	5.23	3.17	5.23
-16.99	5.2	7.16	5.2
5.69	10.72	-9.68	10.72
-15.37	9.23	-24.06	9.23
12.21	-34.3	-34.58	-34.3
-19.43	-17.5	-47.62	-17.5
-13.56	5.09	-25.31	5.09
-22.44	10.76	-26.57	10.76
-18.37	-10.69	-13.19	-10.69
-29.1	-36.9	-18.17	-36.9
-33.6	9.91	5.76	9.91
-19.44	6.57	7.58	6.57
-24.26	1.98	-6.19	1.98
-12.23	5.74	-20.17	5.74
-23.26	6.33	10.97	6.33
-22.62	8.67	6.8	8.67
9.07	-47.45	11.98	-47.45
11.71	-24.71	7.97	-24.71
-14.48	4.8	2.66	4.8
8.39	7.82	5.68	7.82
9.48	-18.85	-33.86	-18.85
-20.82	-22.84	-16.58	-22.84
-5.93	-15.26	9.48	-15.26
11.76	-14.77	9.27	-14.77
10.31	-31.99	6.58	-31.99
6.19	-31.99	8.29	-31.99
1.12	-30.5	-1.18	-30.5
8.28	-27.23	8.3	-27.23
-5.56	4.21	11.36	4.21
-23.57	11.1	4.85	11.1
-15.62	9.58	10.32	9.58
-35.13	5.37	-19.19	5.37
-28.76	9.72	-12.01	9.72
-23.2	7.6	4.65	7.6
-23.92	-9.93	4.54	-9.93
-32.96	-18.36	5.59	-18.36
-42.06	-34.7	6.44	-34.7
-29.12	5.44	6.77	5.44
-18.2	6.03	11.15	6.03
-38.27	1.03	6.44	1.03
-16.72	8.69	8.39	8.69
12.35	-31.04	10.36	-31.04
13.34	-23.07	8.66	-23.07
-2.78	5.67	10.17	5.67
-12.39	9.97	10.47	9.97
-4.07	11.37	11.84	11.37
-14.33	14.54	8.5	14.54
9.85	2.67	-14.54	2.67
9.23	10.45	-15.44	10.45
5.82	-11.11	7.76	-11.11
7.63	-17.74	11.44	-17.74
9.61	5.49	4.81	5.49
8.91	10.38	7.71	10.38
-14.98	4.53	-2.98	4.53
-37.56	10.64	-47.02	10.64
-19.39	-36	-35.03	-36
-33.24	-34.52	-24.26	-34.52
-1.06	-28.99	-13.89	-28.99
-17.45	-9.6	8.11	-9.6
-5.92	-24.35	5.45	-24.35
-31.94	10.67	8.99	10.67
-27.8	7.2	8.38	7.2
-17.59	7.7	-15.97	7.7
-50.16	8.22	-18.13	8.22
-26.62	-18.97	-10.07	-18.97
1.77	-31.32	-24.72	-31.32
7.22	3.6	-27.78	3.6
9.91	8.7	-38.71	8.7
-15.63	9.69	-13.07	9.69
-10.78	11.6	-14.04	11.6
-24.83	10.48	-43.39	10.48
-17.42	4.88	8.17	4.88
-15.88	11	5.55	11
-20.15	6.54	9.45	6.54
-11.83	-23.04	7.85	-23.04
-28.78	-16.66	-34.28	-16.66
-16.21	-27.08	1.41	-27.08
-19.94	-26.53	-10.97	-26.53
-20.93	-7.5	-27.26	-7.5
-8.47	-31.33	-9.5	-31.33
-5.05	-11.49	-11.12	-11.49
-24.79	-0.62	-15.56	-0.62
-19.45	-14.16	-15.17	-14.16
-30.29	8.49	-22.21	8.49
-10.13	9.78	6.97	9.78
-24.24	8.94	7.16	8.94
-31.53	9.49	-15.14	9.49
-9.41	3.38	-7.58	3.38
-44.85	6.07	10.93	6.07
-46.3	-18.35	6.95	-18.35
-21.5	-27.04	-27.21	-27.04
-25.82	9.46	-30.55	9.46
-18.76	7.95	0.94	7.95
-20.28	7.49	7.76	7.49
-17.9	10	-24.12	10
8.74	6.83	-8.45	6.83
4.11	7.73	4.47	7.73
8.15	-22.8	8.4	-22.8
-16.52	-14.89	-17.72	-14.89
-41.92	4.38	-19.75	4.38
-23.83	6.81	0.69	6.81
-15.17	-14.19	-19.97	-14.19
-13.58	-13.43	7.82	-13.43
-16.86	-19.11	7.74	-19.11
-16.82	-18.02	7.8	-18.02
-19.69	-6.79	-12.22	-6.79
11.07	-28.95	-21.61	-28.95
6.15	-23.74	8.17	-23.74
6.69	-29.81	12.46	-29.81
9.89	-12.27	8.71	-12.27
6.04	-32.04	10.28	-32.04
10.46	-16.04	5.41	-16.04
8.16	7.36	8.44	7.36
8.38	7.81	-17.41	7.81
2.6	-32.49	-23.95	-32.49
4.8	-6.46	-39.28	-6.46
9	-21.27	-15.37	-21.27
4.93	-24.94	9.93	-24.94
-15.02	-23.59	10.98	-23.59
-24.83	11.23	8.73	11.23
-21.33	8.07	6.53	8.07
-22.59	-10.75	-13.42	-10.75
-37.33	-15.11	-28.57	-15.11
13.36	-33.5	6.21	-33.5
7.97	-45.4	9.71	-45.4
7.55	3.12	-19.26	3.12
6.84	9.82	-25.39	9.82
-25.47	7.51	7.74	7.51
-31.64	10.67	5.58	10.67
8.26	-0.74	6.63	-0.74
8.42	7.26	10.08	7.26
6.88	-1.84	-27.78	-1.84
1.75	1.11	-22.22	1.11
6.49	-9.74	9.35	-9.74
8.81	-17.13	6.04	-17.13
10.64	5.16	-25.63	5.16
-30.98	5.99	-18.46	5.99
-33.73	10.86	-22.02	10.86
-34.3	8.96	-15.97	8.96
-27.97	-22.23	-31.08	-22.23
-37.29	-17.8	-25.81	-17.8
-15.53	7	2.49	7
-11.48	10.23	-2.38	10.23
-9.78	4.78	10.16	4.78
-17.26	2.21	4.88	2.21
-10.56	10.2	-27.18	10.2
-15.83	6.74	-36.2	6.74
-18.36	6.68	-15.42	6.68
-27.58	9.05	-41.7	9.05
-26.35	9.19	-29.65	9.19
-12.4	9.08	-33.56	9.08
-39.97	-13.43	9.8	-13.43
-28.03	-11.41	14.14	-11.41
-12.01	-8.28	-5.95	-8.28
-10.76	-28.69	-13.02	-28.69
-9.12	-29.76	-12.48	-29.76
-21.94	-3.19	-32.7	-3.19
3.03	-44.51	-3.92	-44.51
6.8	-21.61	-29.79	-21.61
-24.81	7.98	-18.22	7.98
-11	9.52	-11.67	9.52
-21.24	4.72	-29.63	4.72
9.2	7.01	-23.16	7.01
10.38	11.46	4.52	11.46
-8.84	11.06	9.08	11.06
-40.92	-15.53	8.56	-15.53
-36.6	-8.97	6.79	-8.97
5.92	10.5	11.62	10.5
6.07	7.44	8.25	7.44
6.44	-1.96	3.66	-1.96
6.04	8.59	5.69	8.59
11.73	2.87	6.82	2.87
2.57	-35.25	-22.5	-35.25
10.29	-2.31	-40.97	-2.31
3.88	-18.42	-7	-18.42
9.26	-12.08	-27.93	-12.08
7.66	11.55	-27.22	11.55
10.21	8.46	0.23	8.46
-16.26	7.58	6.93	7.58
3.46	9.63	9.11	9.63
13.21	5.99	10.29	5.99
-42.37	7.34	10.07	7.34
7.12	-18.45	9.02	-18.45
6.62	-26.4	9.85	-26.4
10.88	10.16	9.75	10.16
4.57	8	-34.56	8
6.91	7.75	-28.94	7.75
9.42	7.54	-16.2	7.54
2.38	-29.4	-34.31	-29.4
6.24	1.06	-18.56	1.06
3.24	-26.37	-29.64	-26.37
9.64	-22.72	-12.89	-22.72
7.58	-20.19	10.2	-20.19
9.45	-14.83	7.16	-14.83
8.57	7.21	-22.51	7.21
6.9	10.82	-15.69	10.82
-16.5	-15.88	-32.51	-15.88
-8.72	-12.53	-14.67	-12.53
-23.61	8.56	8.5	8.56
-23.16	4.75	10.6	4.75
-38.63	7.9	-14.12	7.9
-18.34	7.29	-29.63	7.29
-20.27	6.43	4.09	6.43
-17.44	-31.96	3.61	-31.96
4.51	-16.29	-17.85	-16.29
7	10.3	-25.75	10.3
5.78	11.06	-33.22	11.06
7.92	-30.12	-22.37	-30.12
7.02	-32.24	-27.1	-32.24
9.77	11.76	-48.25	11.76
-23.74	8.71	8.37	8.71
-21.45	-32.08	9.83	-32.08
-18.47	-15.86	9.4	-15.86
-19.4	-11.48	12.03	-11.48
8.19	8.71	-19.21	8.71
12.28	8.01	-30.62	8.01
10.18	5.23	-7.93	5.23
11.67	2.05	6.48	2.05
10.06	6.83	7.25	6.83
11.72	-13.56	1.12	-13.56
10.37	-18.9	11.99	-18.9
10.65	-13.79	11.39	-13.79
12.51	-37	9.46	-37
12.89	-6.59	9.63	-6.59
-20.21	-6.04	10.65	-6.04
-21.38	-24.22	4.02	-24.22
-28.8	-46.61	11.06	-46.61
-12.43	5.93	6.55	5.93
-31.38	6.35	13.88	6.35
-12.78	6.09	-12.11	6.09
-20.6	8.1	-24.66	8.1
-19.93	-36.7	-20.53	-36.7
-6.75	-16.38	-22.76	-16.38
-26.15	5.06	9.48	5.06
-31.1	10.19	4.44	10.19
-22.26	8.63	-29.68	8.63
-27.96	1.81	-17.01	1.81
8.23	5.5	-8.82	5.5
8.67	-33.64	-21.15	-33.64
10.12	-21.23	10.69	-21.23
-31.06	10.79	10.3	10.79
6.95	12.02	9.63	12.02
7.3	4.73	-2.05	4.73
4.56	7.07	9.87	7.07
5.97	7.96	12.8	7.96
8.7	12.88	4.15	12.88
8.1	10.6	1.96	10.6
-7.68	10.4	8.76	10.4
-20.93	11.74	8.72	11.74
-18.65	3.49	9.77	3.49
-7.66	8.95	-24.41	8.95
-20.19	7.03	-18.64	7.03
8.79	5.55	7.7	5.55
7.5	10.09	9.02	10.09
-22.05	-22.79	-42.06	-22.79
-18.07	-11.04	-15.08	-11.04
-33.11	-12.89	-18.59	-12.89
6.42	-18.72	-14.38	-18.72
11.18	-24.18	-7.16	-24.18
9.31	-17.92	-14.3	-17.92
11.16	-24.22	-21.05	-24.22
-29.27	-26.59	-14.45	-26.59
-21.71	-14.94	-53.78	-14.94
4.78	-22.32	-24.1	-22.32
7.03	-30.48	-34.69	-30.48
-27.64	-42.93	-50.16	-42.93
-34.3	-13.1	11.09	-13.1
7.68	-19.56	9.33	-19.56
-8	-21.64	9.28	-21.64
-22	-13.93	7.88	-13.93
10.41	4.23	7.28	4.23
8.21	11.63	8.36	11.63
9.71	-13.62	7.19	-13.62
9.02	-25.35	3.45	-25.35
3.89	6.25	-0.55
2.65	7.58	6.96
11.21	4.15	-21.99
4.15	7.58	-35.58
5.02	5.5	-18.52
10.61	12.68	-13.38
10.2	6.22	7.31
11.84	10.18	7.95
8.8	-20.64	11.15
6.08	-13.13	-22.26
7.85	-27.6	-34.13
1.64	-16.99	5.38
8.02	7.68	10.63
8.95	5.05	-34.26
5.88	1.75	-7.58
8.09	6.49	-40.94
-36.41	4.51	-22.47
-19.07	7	-23.83
-41.92	8.8	9.24
-20.73	6.08	3.94
-21.9	-29.94	5.99
8.93	-26.73	11.1
-32.39	10.31	10.97
-46.12	10.46	12.6
-26.66	3.74	-17.93
-26.25	8.08	-28.45
-5.93	-20.26	10.33
-21.74	-38.23	7.55
-43.46	11.1	10.44
-28.83	8.11	5.88
-26.78	-42.56	-9.08
-14.89	-17.7	-49.81
-34.85	-26.55	6.21
-24.05	-19.98	7.73
-22.34	-18.28	10.77
-9.25	-4.6	9.73
8.33	-24.37	5.14
7.45	-34.15	5.72
-14.92	-18.35	7.48
-41.46	-21.3	-0.69
-29.94	-17.1	3.33
-26.73	-36.75	8.5
10.62	-15.37	1.98
-35.95	-16.63	10.1
-21.78	-13.18	4.14
-15.98	-25.5	-6.19
-25.86	-10.38	10.94
-17.89	-22.01	6.68
10.73	-25.78	-32.24
-37.51	-20.66	-17.65
-42.96	-14.94	-16.28
-49.08	-11.99	-0.84
-31.46	-13.89	8.92
-13.27	-27.47	10.57
-28.61	-18.11	7.76
-13.01	5.69	6.67
-32.9	9.06	9.56
-14.34	4.76	10.1
9.38	4.79	8.27
9.55	3.3	-19.95
-35.6	3.17	-13.08
-19.08	10.08	-20.62
-29.76	8.96	-14.78
-13.75	-14.14	-25.19
-16.25	-28.79	-41.77
7.3	-26.29	-13.89
5.26	-4.74	-28.14
7	-29.39	-26.12
9.99	-41.18	-31.99
-37.8	-27.15	-29.44
-15.2	-57.8	-14.05
10.85	-17.26	-36.57
11.76	-23.79	-22.24
5.64	6.17	5.94
10.19	8.21	11.69
11.05	0.86	9.97
3.27	9.5	12.45
8.69	5.79	-16.86
10.98	10.13	-30.63
6.38	13.64	4.79
7.69	7.41	7.09
10.93	10.47	7.38
-28.11	9.91	11.72
-19.26	5.78	-34.02
-16.57	10.91	-31.04
-16.68	-36.99	-28
-17.38	-41.45	-23.72
-12.6	-14.91	-42.47
-18.16	-22.94	7.55
-30.99	-20.65	12.95
-8.23	-32.6	-16.62
-33.4	3.13	-22.38
-17.41	9.67	3.79
-26	7.98	6.74
-27.95	6.81	-22.25
-18.84	-22.52	-22.03
-21.47	-20.19	7.1
-29.43	9.85	8.37
10.31	8.78	-20.2
10.46	9.56	-26.38
-29.51	5.31	-28.25
-14.86	10.35	-3.33
8.78	8.92	-10.23
6.56	5.35	-29.06
7.86	9.88	-17.96
6.17	-27.1	-16.34
8.1	-23.63	-37.58
10.72	-29.62	-19.16
4.01	-6.88	-25.71
9.29	4.89	-33.35
-16.62	12.65	-15.1
-7.31	6.3	-27.84
-17.9	10.08	7.84
-17.54	8.44	9.95
-27.17	9.47	-21.05
-23.2	-34.79	-19.48
-11.17	-12	-26.6
-11.7	-19.32	-6.12
-18.65	-27.33	8.93
-18.19	9.28	10.38
-16.03	11.07	8.03
-28.94	4.5	8.82
-21.11	5.43	10.48
-21.89	10.18	11.32
-4.56	9.31	-14.06
-11.58	-38.42	-23.36
9.04	-24.91	-49.89
14	-37.11	-33.48
9.95	1.15	5.3
10.69	9.84	10.2
10.1	10.42	-4.6
11.93	-30.04	-13.78
9.94	-23.65	-21.38
3.66	10.15	-19.05
-0.38	5.81	11.5
-27.6	-19.02	12.58
-32.72	-28.49	-28.05
-18.65	2.28	-20.56
-10.56	10.28	-25.34
-23.23	-19.13	-14.12
-27.54	-5.58	-16
-16.15	-15.05	-22.19
9.44	-31.79	4.12
7.2	-7.22	8.33
-33.18	-13.95	4.56
-20.24	-20.7	5.91
-6.71	-10.65	-11.49
-20.56	-20.42	-0.62
-21.14	-19.8	9.78
-36.5	-4.06	8.94
-20.16	-26.45	8.62
-22	-22.72	7.99
-10.8	-13.77	-27.65
-35.98	-14	-8.21
-12.55	-19.19	-25.96
-40.42	-2.6	-5.52
6.7	2.95	-15.14
9.28	10.11	-20.38
10.85	11.87	3.44
7.97	9.5	4.28
8.75	-40.5	-22.42
8.29	-39.79	-36.17
8.97	7.52	7.11
8.76	7.65	8.81
8.54	3.58	-17.34
3.85	3.68	-14.72
10.42	10.12	-26.68
9.26	-6.07	-32.33
10.35	-21.44	-19.93
7.18	-26.95	-18.89
6.98	-5.16	-26.46
7.34	9.23	-34.6
-21.78	6.22	-4.23
-19.56	-16.05	7.92
10.51	-8.19	7.1
6.75	5.92	9.16
8.57	7.51	4.75
10.39	-22.95	-44.44
-14.29	-12.54	-14.78
-33.16	10.78	-8.88
5.72	7.63	-27.71
2.26	6.67	10.69
6.68	8.02	5.02
10.11	5.52	10.79
-22.15	10.33	9.63
-25.9	-20.58	-36.05
11.54	-14.42	-31.27
9.38	-22.28	6.62
7.5	-7.93	7.92
8.54	-13	9.17
8.2	-18.19	5.9
8.74	-40.43	8.38
10.67	7.37	9.28
7.57	4.94	11.66
10.23	-19.8	6.72
11.41	-33.94	-6.49
8	-27.81	-30.12
5.49	-19.9	-11.7
-15.92	-37.58	-37.67
-26.45	-39.25	-20.14
-40.41	-50.4	-17
-25.33	-8.88	-1.46
13.33	-17.1	10.05
11.94	-15.06	10.36
9.98	-30.29	9.25
7.66	-25.88	7.88
8.13	-9.58	6.83
-22.15	-9.05	9.02
-11.59	5.11	8.07
7.05	5.39	-14.7
12.38	9.93	-6.6
7.22	10.58	3.85
8.01	9.87	9.58
9.94	-14.15	-22.52
-17.07	-10	-20.75
-10.65	-0.97	6.91
-22.33	-40.73	12.87
-11.76	7.31	13.14
-16.96	11.19	8.96
-38.62	7.28	6.39
-33.78	7.64	11.54
-17.21	12.02	-39.78
-11.46	11.69	-15.55
8.63	7.28	-28.02
7.97	-12.11	-31.61
9.16	-13.02	10.23
7.25	-23.23	12.85
11.36	-29.21	10.2
-41.7	-21.09	6.74
-20.19	-28.71	5.71
9.77	8.12	3.67
9.46	10.51	3.59
12.07	-25.67	4.85
10.56	-14.82	-18.97
-28.95	-17.9	-10.73
-21.17	-5.08	-8.07
-10.56	5	-19.39
-9.12	10.95	-23.19
-11.77	6.75	7.98
-35.63	9.73	7.58
-13.37	10.01	-30.85
-13.6	7.06	-10.26
10.81	2.21	8.5
11.9	11.39	13.47
9.48	-8.49	7
8.95	-18.58	11.59
6.62	-30.22	6.81
8.22	-21.32	12.67
10.14	10.42	5.76
7.14	9.99	9.24
6.65	-17.33	-16.58
-18.27	-45.06	-24.93
-29.48	-27.48	8.69
-30.96	-30.11	3.67
-41.3	5.62	7.35
-39.1	12.3	10.57
-27.71	-33.14	-19.14
-25.33	-13.15	-5.37
3.41	5.47	9.16
10.06	8.18	6.46
-25.04	-23.71	-20.53
7.64	-33.47	-14.14
9.32	-23.46	-23.94
9.64	-20.35	-20.14
10.71	-37.14	4.79
9.53	-14.96	7.8
8.74	-26.16	-34.19
-1.7	-27.37	-11.15
3.74	9.17	9.82
8.08	7.78	7.67
9.57	9.47	9.63
7.64	11.39	12.73
-17.89	-19.77	7.55
-29.74	-8.05	11.39
11.41	-26.83	7.93
-16.88	-19.43	7.96
7.48	-2.8	7.3
-17.78	12.83	11.63
-21.86	6.7	-21.85
-27.6	6.5	-33.94
-33.02	5.82	-14.46
-15.99	10.65	-20.8
-27.29	-18.87	-39.95
-21.88	-46.69	-19.43
-30.24	-14.74	9.43
-27.62	-28.14	11.72
-20.26	-7.3	8.89
-38.23	-19.66	6.79
-20.67	-7.3	-24.25
-15.17	-16.7	-18.63
-17.7	-17.45	8.49
-18.67	-39.51	2.11
7.67	-17.24	8.77
8.48	-38.24	9.95
8.11	9.37	8.89
7.51	8.87	6.36
7.72	-39.71	-24.21
10.45	-24.68	3.43
7.79	-16.35	9.49
5.37	-15.09	6.97
6.76	-9.78	8.35
8.34	-22.76	12.44
7.84	-38.96	8.47
10.51	-21.8	9.24
9.3	5.49	7.69
7.12	6.03	9.77
11.01	-29.99	9.52
8.75	-29.02	11.27
10.62	-20.65	4.95
10.43	-17.44	9.31
6.98	-22.46	-21.49
9.66	7.34	-48.45
-18.79	8.31	-27.49
-32.22	-5.1	2.39
8.48	11.79	9.19
12.02	10	4.92
6.71	9.49	-36.16
8.47	10.49	-24.65
9.45	-20.69	8.95
9.3	-28.94	2.04
6.56	-25.52	-22.57
5.83	-14.35	-24.96
-40.2	-20.09	10.3
-42.56	-10.7	11.06
-12.51	-11.08	-11.19
-17.7	-41.15	-21.56
-47.6	-11.16	-25.45
-12.41	-23.36	-26.84
-19.04	-23.22	-15.88
-22.25	-5.9	-31.41
-31.49	8.51	11.07
-29.76	9.48	9.23
-14.35	-28.8	-23.08
-32.02	-14.34	-13.29
-27.57	11.96	-18.36
-12.4	8.65	-12.64
-12.78	8.54	6.84
-43.96	8.03	12.03
-13.11	-25.57	-21.17
-27.71	-21.28	-19.5
8.86	8.84	-32.41
7.51	8.44	-23.69
9.94	-27.29	-16.88
-10.47	-20.56	-29.09
-4.94	7.74	8.92
8.89	7.02	5.62
-22.62	9.34	9
-24.32	7.87	5.34
7.64	-24.1	6.85
8.54	-21.03	-27.22
8.1	9.56	-22.36
5.1	12.42	7.55
8.44	-20.38	10.1
11.16	-14.71	-23.37
8.74	6.9	-45.25
8	10.41	11.34
-9.74	-10.28	1.07
-38.32	-38.77	-16.03
-22.76	3.34	-14.95
-39.51	11.44	10.89
11.95	5.99	7.57
12.75	7.4	9.34
-28.48	10.37	7.84
-15.85	11.57	-3.04
-11.31	5.42	-5.57
-26.79	8.01	8.91
-35.69	-22.34	6.61
-19.68	-12.14	-38.27
-14.55	-7.52	-27.95
6.98	6.31	-27.65
9.19	6.44	-16.22
10.64	5.54	-8.86
-15.35	9.47	-27.58
-24.14	-13.38	-20.92
-20.4	-38.07	-14.4
-29.11	-18.76	-21.17
-26.43	3.77	9.88
-12.81	3.87	8.19
-40.28	6.48	-39.78
-26.29	9.52	-15.55
7.01	11.41	9.54
8.2	-35.37	10.51
-11.98	-17.97	9.93
-13.44	9.22	11.61
10.11	10.72	-9.32
10.45	5.98	-24.23
8.85	8.03	-30.22
10.12	3.75	-21.32
-32.35	3.34	10.65
-41	7.9	8.4
-31.49	11.29	6.87
-12.38	5.99	6.67
-16.22	7.66	-33.73
-19.8	10.62	-6.6
-35.12	10.73	-19.25
-29.76	-0.08	-6.41
-39.48	-16.74
-23.07	-24.74
-25.99	-0.25
-28.46	-16.87
-11.25	-27.25
9.46	7.05
10.05	7.95
3.35	-19.4
3.75	-9.52
8.75	9.09
8.26	10.74
-25.83	5.84
4.63	13.45
6.78	8.13
8.12	10.28
9.63	8.16
8.99	10.08
10.04	8.63
11.08	8.13
8.32	-29.27
10.82	-21.2
-19.51	-32.43
-23.33	-37.04
-27.39	2.58
-7.47	6.56
-33.53	9.34
-23.02	6.28
-17.34	9.06
-9.16	10.81
-26.55	6.02
-19.98	8.24
-18.28	10.37
-4.6	10.76
-24.37	9.78
-17.48	7.98
-11.39	7.94
-21.31	4.62
-23.48	0.24
-27.18	10.88
-37.14	7.71
-30.12	2.69
-31.19	3.26
-16.65	5
0.86	7.1
-11.45	3.5
-17.16	6.76
-21.3	10.97
-17.1	5.53
-22.02	11.36
-36.75	9.55
-19.42	4.74
-15.37	10.07
-42.08	10.15
-29.47	11.78
-32.24	5.96
-20.12	4.94
-25.09	-21.56
-13.14	-6.33
-19.68	-15.27
-13.08	-13.55
-21.44	7.27
-22.7	7.99
-14.9	8.64
-36.41	9.08
-4.14	3.17
-19.94	7.16
-34.8	-9.68
-27.36	-24.06
-22.53	-34.58
6.63	-47.62
7.76	-25.31
10.02	-26.57
9.33	-13.19
13.51	-18.17
7.14	5.76
4.19	7.58
8.92	-6.19
10.47	-20.17
5.68	10.97
7.11	6.8
8.55	11.98
9.61	7.97
6.82	2.66
8.01	5.68
9.23	-33.86
5.52	-16.58
9.33	9.48
6.37	9.27
6.05	6.58
8.52	8.29
9.98	-1.18
-16.81	8.3
-16.08	11.36
11.48	4.85
7.3	10.32
9.32	-19.19
3.07	-12.01
2.42	4.65
4.71	4.54
7.88	5.59
6.34	6.44
9.78	6.77
-3.68	11.15
-11.2	6.44
4.5	8.39
-17.44	10.36
-20.47	8.66
-29.05	10.17
-18.56	10.47
8.81	11.84
-20.25	8.5
-30.48	-14.54
-36.99	-15.44
-14.82	7.76
3.72	11.44
9.64	4.81
4.81	7.71
9.6	-2.98
6.92	-47.02
6.64	-35.03
9	-24.26
13.23	-13.89
6.09	8.11
7.12	5.45
5.32	8.99
11.68	8.38
7.76	-15.97
-35.06	-18.13
-28.41	-10.07
5.96	-24.72
7.57	-27.78
6.4	-38.71
-21.28	-13.07
6.32	-14.04
5.36	-43.39
0.26	8.17
-30.69	5.55
-28.76	9.45
-29.92	7.85
-39.15	-34.28
13.05	1.41
5.78	-10.97
8.18	-27.26
9.28	-9.5
-12.94	-11.12
-32.72	-15.56
-20.18	-15.17
-7.72	-22.21
8.26	6.97
8.7	7.16
10.92	-15.14
10.12	-7.58
7.88	10.93
10.99	6.95
-19.71	-27.21
-15.66	-30.55
9.97	0.94
11.23	7.76
10.99	-24.12
6.15	-8.45
7.69	4.47
-17.29	8.4
-19.66	-17.72
-9.82	-19.75
-21.54	0.69
-34.53	-19.97
-11.93	7.82
-3.68	7.74
-25.05	7.8
0.12	-12.22
9.83	-21.61
12.59	8.17
8.4	12.46
5.01	8.71
-10.87	10.28
-26.93	5.41
-16.63	8.44
-13.18	-17.41
-25.5	-23.95
-21.68	-39.28
-10.38	-15.37
6.04	9.93
7.75	10.98
9.18	8.73
-16.9	6.53
-22.71	-13.42
-25.65	-28.57
7.72	6.21
10.63	9.71
3.06	-19.26
-47.37	-25.39
6.16	7.74
-22.66	5.58
7.54	6.63
6.91	10.08
7.47	-27.78
9.86	-22.22
8.67	9.35
7.45	6.04
7.85	-25.63
-24.37	-18.46
10.4	-22.02
9.68	-15.97
10.91	-31.08
6.59	-25.81
6.51	2.49
7.16	-2.38
7.49	10.16
9.41	4.88
5.44	-27.18
11.46	-36.2
5.12	-15.42
8.8	-41.7
6.53	-29.65
7.54	-33.56
6.51	9.8
-22.01	14.14
-25.78	-5.95
-13.15	-13.02
-11.32	-12.48
-24.27	-32.7
-31.77	-3.92
8.57	-29.79
10.3	-18.22
-32.26	-11.67
-23.56	-29.63
-36.17	-23.16
-22.13	4.52
-5.46	9.08
-22.98	8.56
-0.77	6.79
-18.09	11.62
-44.34	8.25
-9.11	3.66
-29.14	5.69
-15.03	6.82
5.37	-22.5
10.17	-40.97
10.67	-7
9.04	-27.93
-41.49	-27.22
-29.74	0.23
-28.15	6.93
-12.32	9.11
-20.13	10.29
-27.05	10.07
-15.48	9.02
-28.35	9.85
9.48	9.75
10.74	-34.56
-12.83	-28.94
-26.31	-16.2
5.17	-34.31
-24.76	-18.56
6.7	-29.64
1.51	-12.89
-8.02	10.2
8.52	7.16
4.99	-22.51
10.27	-15.69
9.32	-32.51
11.02	-14.67
6.25	8.5
4.13	10.6
7.28	-14.12
8.76	-29.63
11.87	4.09
10.8	3.61
10.97	-17.85
9.89	-25.75
-22.73	-33.22
-2.53	-22.37
-20.55	-27.1
11.56	-48.25
-24.66	8.37
-18.87	9.83
-6.76	9.4
-11.66	12.03
-24.2	-19.21
-9.83	-30.62
-18.34	-7.93
9.73	6.48
-13.23	7.25
-20.48	1.12
9.6	11.99
2.21	11.39
7.54	9.46
-17.16	9.63
-27.73	10.65
-11.76	4.02
-8.89	11.06
-25.3	6.55
-19.93	13.88
-18.07	-12.11
-25.79	-24.66
-32.47	-20.53
8.16	-22.76
8.47	9.48
-3.71	4.44
10.38	-29.68
9.6	-17.01
10.27	-8.82
8.6	-21.15
8.44	10.69
-35.4	10.3
-32.66	9.63
-28.65	-2.05
-29.59	9.87
-47.35	12.8
-19.26	4.15
-13.91	1.96
11.45	8.76
11.87	8.72
7.13	9.77
12.7	-24.41
7.44	-18.64
8.81	7.7
-33.98	9.02
-32.66	-42.06
-14.69	-15.08
-34.34	-18.59
-17	-14.38
-28.07	-7.16
7.85	-14.3
8.12	-21.05
10.45	-14.45
8.45	-53.78
-13.45	-24.1
-8.18	-34.69
12.35	-50.16
11.13	11.09
9.52	9.33
2.93	9.28
-26.14	7.88
-16.66	7.28
8.38	8.36
9.6	7.19
12.69	3.45
8.54	-0.55
12.35	6.96
10.36	-21.99
8.61	-35.58
7.37	-18.52
11.11	-13.38
-14.92	7.31
-19.88	7.95
7.41	11.15
9.57	-22.26
8.38	-34.13
-36.57	5.38
-25.74	10.63
10.02	-34.26
5.13	-7.58
-19.39	-40.94
6.76	-22.47
9.41	-23.83
7.85	9.24
6.83	3.94
1.85	5.99
-19.5	11.1
-28.52	10.97
-4.1	12.6
-3.89	-17.93
-25.37	-28.45
-20.48	10.33
-3.75	7.55
-20.66	10.44
-14.94	5.88
-28.13	-9.08
-11.99	-49.81
-13.89	6.21
-34.39	7.73
-28.18	10.77
-18.74	9.73
-10.22	5.14
-44.6	5.72
9.65	7.48
10.49	-0.69
8.03	3.33
-22.31	8.5
-17.64	1.98
-27.47	10.1
-33.76	4.14
-18.11	-6.19
10.19	10.94
5.69	6.68
9.06	-32.24
6.72	-17.65
-16.12	-16.28
-42.33	-0.84
10.01	8.92
-27.83	10.57
-25.97	7.76
11.95	6.67
4.76	9.56
4.79	10.1
7.2	8.27
5.03	-19.95
5.49	-13.08
8.4	-20.62
9.61	-14.78
7.71	-25.19
6.79	-41.77
9.32	-13.89
8.6	-28.14
6.15	-26.12
7.06	-31.99
6.28	-29.44
10.75	-14.05
5.06	-36.57
9.6	-22.24
7.13	5.94
5.99	11.69
6.95	9.97
-38.05	12.45
-5.66	-16.86
-44.71	-30.63
-31.68	4.79
-29.04	7.09
-19.8	7.38
-30.87	11.72
-28.62	-34.02
-21.71	-31.04
-25.33	-28
-25.44	-23.72
-21.35	-42.47
-23.02	7.55
6.73	12.95
4.55	-16.62
10.04	-22.38
2.77	3.79
5.26	6.74
4.77	-22.25
9.02	-22.03
9.84	7.1
7.66	8.37
10.01	-20.2
11.75	-26.38
8.15	-28.25
5.34	-3.33
5.62	-10.23
-17.39	-29.06
-14.99	-17.96
-8.42	-16.34
-38.02	-37.58
-5.12	-19.16
-21.43	-25.71
6.61	-33.35
6.62	-15.1
5.41	-27.84
-14.65	7.84
-13.67	9.95
-38.61	-21.05
-15.18	-19.48
-15.85	-26.6
13.1	-6.12
3.92	8.93
4.63	10.38
8.23	8.03
1.71	8.82
8.33	10.48
-18.87	11.32
-13.34	-14.06
-20.14	-23.36
-15.32	-49.89
-23.03	-33.48
-18.58	5.3
-28.27	10.2
-11.1	-4.6
8.14	-13.78
9.75	-21.38
5.11	-19.05
10.33	11.5
9.34	12.58
4.12	-28.05
-0.34	-20.56
-3.22	-25.34
9.09	-14.12
8.61	-16
11.52	-22.19
-11.89	4.12
-21.68	8.33
12.02	4.56
11.48	5.91
9.76	-11.49
6.77	-0.62
8.07	9.78
9.59	8.94
8.95	8.62
-3.48	7.99
-30.76	-27.65
-22.05	-8.21
-22.36	-25.96
-29.05	-5.52
-17.5	-15.14
8.31	-20.38
-34.19	3.44
-37.15	4.28
-11.76	-22.42
3.79	-36.17
8.04	7.11
1.51	8.81
5.36	-17.34
6.09	-14.72
7.58	-26.68
9.93	-32.33
7.9	-19.93
8.23	-18.89
10.42	-26.46
11.76	-34.6
-6.27	-4.23
10.57	7.92
8.25	7.1
10.78	9.16
9.67	4.75
9.13	-44.44
-13.55	-14.78
-31.6	-8.88
-26.47	-27.71
-28.89	10.69
-22.96	5.02
-10.58	10.79
-16.69	9.63
-29.7	-36.05
-22.88	-31.27
-23.37	6.62
-27.34	7.92
-23.88	9.17
-17.64	5.9
-21.54	8.38
-21.53	9.28
-18.48	11.66
-18.07	6.72
-13.5	-6.49
-11.81	-30.12
7.82	-11.7
5.8	-37.67
9.44	-20.14
10.54	-17
6.55	-1.46
7.69	10.05
-24.75	10.36
-32.14	9.25
8.26	7.88
4.36	6.83
9.51	9.02
-24.23	8.07
12.83	-14.7
11.9	-6.6
-21.01	3.85
9.21	9.58
11.41	-22.52
6.82	-20.75
9.26	6.91
7.36	12.87
8.67	13.14
9.6	8.96
7.67	6.39
13.69	11.54
-28.84	-39.78
-21.37	-15.55
-40.59	-28.02
-42.28	-31.61
-23.4	10.23
-29.81	12.85
9.47	10.2
6.91	6.74
-20.09	5.71
-30.33	3.67
4.65	3.59
8.17	4.85
7.67	-18.97
6.25	-10.73
7.91	-8.07
9.25	-19.39
-26.42	-23.19
-43.76	7.98
-23.53	7.58
-23.3	-30.85
-11.47	-10.26
11.75	8.5
-25.09	13.47
-3.69	7
-22.1	11.59
5.82	6.81
9.15	12.67
8.64	5.76
3.89	9.24
10.67	-16.58
10	-24.93
7.74	8.69
9.95	3.67
7.45	7.35
7.13	10.57
3.01	-19.14
6.99	-5.37
9.53	9.16
11.54	6.46
6.34	-20.53
-13.34	-14.14
-7.9	-23.94
12.17	-20.14
-27.2	4.79
-25.27	7.8
-31.23	-34.19
-40.41	-11.15
-38	9.82
-18.16	7.67
9.01	9.63
-17.09	12.73
-8.11	7.55
-25.67	11.39
-32.16	7.93
-12.74	7.96
-26.38	7.3
11.76	11.63
10.18	-21.85
9.29	-33.94
10.42	-14.46
6.18	-20.8
9.05	-39.95
7.89	-19.43
12.05	9.43
5.53	11.72
9.81	8.89
10.7	6.79
8.81	-24.25
7.64	-18.63
10.4	8.49
8.14	2.11
10.85	8.77
11.7	9.95
9.38	8.89
10.23	6.36
11.99	-24.21
9.12	3.43
10.59	9.49
6.29	6.97
7.33	8.35
9.44	12.44
9.84	8.47
9.01	9.24
6.7	7.69
8.08	9.77
7.11	9.52
7.72	11.27
6.06	4.95
8.48	9.31
6.56	-21.49
6.68	-48.45
-20.67	-27.49
-28.84	2.39
9.8	9.19
12.9	4.92
7.6	-36.16
8.64	-24.65
-13.56	8.95
-16.87	2.04
-17.4	-22.57
-15.72	-24.96
4.52	10.3
8.86	11.06
4.08	-11.19
10.99	-21.56
5.58	-25.45
11.01	-26.84
7.59	-15.88
-27.14	-31.41
-23.46	11.07
-13.02	9.23
-11.76	-23.08
-29.82	-13.29
-31.82	-18.36
-30.12	-12.64
-19.9	6.84
-25.6	12.03
-17.27	-21.17
-38.39	-19.5
-19.23	-32.41
-21.35	-23.69
-27.96	-16.88
-39.87	-29.09
-21.62	8.92
-3.43	5.62
-13.34	9
-8.69	5.34
-38.48	6.85
-13.78	-27.22
-30.08	-22.36
-20.5	7.55
-36.69	10.1
-21.19	-23.37
-30.43	-45.25
-22.57	11.34
-9.46	1.07
-7.49	-16.03
-26.13	-14.95
-13.3	10.89
-12.55	7.57
-7.35	9.34
-26.58	7.84
-43.03	-3.04
-15.4	-5.57
-10.98	8.91
-29.81	6.61
-10.62	-38.27
-13.74	-27.95
-40.81	-27.65
-24.86	-16.22
-22.7	-8.86
-11.15	-27.58
-22.11	-20.92
10.73	-14.4
9.94	-21.17
8.77	9.88
9.88	8.19
11.14	-39.78
5.66	-15.55
8.76	9.54
-22.07	10.51
-14.54	9.93
-18.51	11.61
-20.33	-9.32
-24.38	-24.23
-10.49	-30.22
-23.82	-21.32
-18.25	10.65
-31.92	8.4
8.44	6.87
-18.05	6.67
-14.19	-33.73
-25.34	-6.6
-35.93	-19.25
-34.17	-6.41
-23.43
-22.12
-7.46
-10.97
-13.85
-15.4
-26.22
-13.79
-32.62
-10.46
-15.09
-34.71
-26.41
-21.22
-24.37
-12.54
-14.44
-12.47
-32.98
-21.35
-18.13
-17.08
-39.06
5.26
6.56
8.18
7.83
9.88
9.4
8.49
8.22
6.18
6.74
8.89
5.79
7.63
10.6
5.31
6.53
8.6
10.16
10.3
10.73
12.63
7.41
7.1
6.95
12.61
2.9
8.43
-29.61
-27.87
-16.64
-21.08
-18.89
10.16
8.15
-21.07
9.57
8.3
2.45
10.25
-38.11
-9.52
-19.02
-28.9
-18.8
-36.21
-29.27
-35.8
-41.7
-11.78
-25.06
-31.14
-22.1
-20.7
12.93
8.15
-15.26
-15.84
-33.17
10.13
6.4
-49.79
-17.11
11.28
8.41
11.05
10.55
11.36
9.5
8.99
5.45
-14.14
3.81
3.35
5.04
-10.96
-14.63
-28.79
-17.3
-22.98
8.75
-30.03
-15.73
7.73
5.99
-30.03
-15.73
-48.83
-4.26
-17.22
-34.75
-26.29
-4.74
-7.01
-15.5
-20.59
10.01
10.87
7.95
12.6
-27.87
-20.84
9.49
8.56
8.35
7.8
11.56
11.24
2.18
6.3
1.54
4.04
9.38
[truncated: 30,805 more rows]

## Sheet: RI_3ss
ctrl	ACs	ATCs	AOCs	tDASGs	oDASGs
9.75	11.48	11.48	7.63	-20.99	-7.7
-24.12	7.3	7.3	7.43	1.03	-15.24
-9.32	-21.36	-21.36	-21.36	11.48	-10.87
8.36	-7.61	-7.61	-7.61	7.3	-7.7
5.88	2.37	2.37	-3.91	5.26	-10.87
11.68	7.14	7.14	0.01	10.98	-23.79
-6.12	8.4	8.4	-25.2
-23.92	-5.01	-5.01	-15.24
7.11	10.7	10.7	-7.7
8.25	11.11	11.11	-29.88
4.59	-29.98	-29.98	-23.79
-32.8	-21.99	-21.99	-10.87
-23.31	-11.82	-11.82	-21.12
-1.11	-22.41	-22.41	-37.34
8.6	-17.53	-17.53	-20.32
8.43	-14.23	-14.23	-30.93
11.61	11.39	11.39	10.48
9.24	1.44	1.44	9.55
-36.66	-16.49	-16.49	4.74
-28.61	-20.95	-20.95	-36.55
-27.48	9.14	9.14	7.13
7.63	7.01	7.01	-13.27
7.43	5.86	5.86	-21.67
-22.33	7.84	7.84	-12.82
-11.76	-10.35	-10.35	-23.26
-36.32	-8.46	-8.46	7.85
-40.61	4.88	4.88	6.53
-18.72	6.36	6.36	12.84
11.29	6.21	6.21	-10.58
12.5	2.12	2.12	8.59
-21.36	10.62	10.62	10.12
-7.61	10.73	10.73	8.45
-10.98	-5.33	-5.33	8.29
-20.36	-27.23	-27.23	-15.42
-10.17	-1.18	-1.18	-9.19
-29.39	3.94	3.94	-23.47
-15.63	9.24	9.24	-22.38
1.86	8.3	8.3	11.48
-35.81	-13.27	-13.27	7.52
-26.86	-21.67	-21.67	12.98
2.37	7.25	7.25	-2.45
7.14	5.69	5.69	6.68
8.6	-48.19	-48.19	9.85
6.15	-26.53	-26.53	-15.41
7.06	10.22	10.22	-23.91
10.65	7.83	7.83	-17.41
-32.99	-24.04	-24.04	-13.63
-7.39	10.49	10.49	-38.12
9.23	6.16	6.16	5.36
1.53	3.68	3.68	9.9
1.53	-43.9	-43.9	-19.25
-34.63	-14.23	-14.23	-10.49
-15.22	-35.01	-35.01	-6.14
-29.33	-20.62	-20.62	-6.93
-20.38	-9.94	-9.94	-20.04
7.59	-9.73	-9.73
2.6	8.49	8.49
8.4	9.13	9.13
-5.01	-20.99	-20.99
10	1.03	1.03
-1.18	13.16	13.16
10.7	9.34	9.34
11.11	-9.46	-9.46
-15.88	-25.42	-25.42
-29.44	7.89	7.89
1.61	-9.01	-9.01
2.69	5.99	5.99
7.2	-20.19	-20.19
2.59	6.68	6.68
-8.16	9.85	9.85
-23.12	-10.3	-10.3
9.66	-18.6	-18.6
7.47	5.26	5.26
10.05	10.98	10.98
8.37	8.21	8.21
-18.7	9.33	9.33
-28.08	-11.96	-11.96
8.26	9.16	9.16
4.64	-21.01	-21.01
-3.91	-17.73	-17.73
0.01	6.57	6.57
-25.2	8.6	8.6
-30.96	7.88	7.88
-18.04	5.69	5.69
5.23	7.6	7.6
11.78	-3.02	-3.02
-10.42	7.63
7.67	7.43
10.15	-21.36
5.81	-7.61
-14.3	-3.91
-17.53	0.01
-13.1	-25.2
-27.39	-15.24
-12.15	-7.7
5.44	-29.88
-29.98	-23.79
-21.99	-10.87
-11.82	-21.12
-22.41	-37.34
-13.79	-20.32
-34.76	-30.93
-8.04	10.48
-15.65	9.55
-29.88	4.74
-10.87	-36.55
8.8	7.13
-5.67	-13.27
-21.03	-21.67
-32.81	-12.82
-4.77	-23.26
1.9	7.85
-14.88	6.53
-26.96	12.84
6.22	-10.58
7.04	8.59
-13.74	10.12
-13.73	8.45
10.28	8.29
-3.01	-15.42
-11.43	-9.19
7.82	-23.47
11.3	-22.38
-17.53	11.48
-14.23	7.52
11.39	12.98
1.44	-2.45
-1.71	6.68
-10.86	9.85
-32.82	-15.41
9.83	-23.91
5.71	-17.41
-9.29	-13.63
4.32	-38.12
-16.49	5.36
-20.95	9.9
9.14	-19.25
7.01	-10.49
-38.06	-6.14
-31.56	-6.93
-17.81	-20.04
-17.66
-17.05
-28.41
-20.82
11.75
3.59
-19.68
-11.31
-34.06
4.71
-14.57
-31.57
-26.04
10.5
-37.81
-8.88
10.37
-2.7
-21.7
8.86
-1.46
6
-0.07
11.45
10.42
-7.27
-13.26
-23.84
-9.32
12.11
8.22
-24.04
4.8
9.44
6.82
13.65
6.32
6.45
-26.04
3.95
13.65
6.45
13.65
6.32
6.45
-19.76
-13.48
-22.22
-11.82
-39.3
7.78
6.2
12.25
2.94
4.18
-6.94
-5.65
-7.78
-42.19
11.15
-21.57
-12.71
-24.65
-6.92
9.24
8.74
5.86
7.84
11.47
12.76
10.76
8.28
-38.25
-33.21
-21.12
-37.34
-16.12
-16.78
1.88
-20.32
-30.93
-31.88
-11.4
-48.25
4.46
-18.03
5.16
-10.35
-8.46
4.88
6.36
4.14
8.39
7.82
7.93
5.27
6.21
2.12
-15.83
-1.19
10.07
6.76
10.64
4.91
6.52
-27.25
1.78
4.09
5.52
10.62
10.73
9.42
8.53
8.19
7.24
5.83
-10.8
-16.05
7.79
-7.2
9.89
5.15
-14.11
9.07
-23.82
-37.6
-5.33
-27.23
4.28
0.35
-27.1
-26.01
9
9.56
13.94
10.94
-19.29
-15.93
10.48
9.55
4.74
10.19
3.12
-20.35
8.04
7.07
8.91
0.16
10.45
11.83
8.16
8.17
-2.46
-15.17
9.32
6.41
-1.18
3.94
9.24
8.3
-36.55
7.13
-5.13
-8.38
-12.45
-16.73
8.28
-29.35
-18.55
6.93
-28.32
-27.63
-13.27
-21.67
12.26
12.41
7.25
5.69
7.94
-16.65
-34.27
-23.43
-33.75
-33.46
-37.52
-38.34
-27.78
6.41
-48.19
-26.53
-23.12
-30.65
-12.95
-14.77
-17.71
-23.3
-43.01
-21.32
4.16
7.27
-16.06
-20.88
-18.15
-37.55
-31.42
-30.76
9.36
6.27
6.26
9.24
9.06
-16.03
-28.36
-28.04
-10.37
-20.86
-31.49
-11.03
5.99
8.58
-32.6
6.49
7
7
-18.61
-22.69
7.01
4.5
6.55
1.91
-30.95
-16.97
-12.82
-23.26
-16.04
-29.9
9.65
9.29
3.49
8.22
3.49
-1.58
-32.36
-24.53
-17.25
-24.71
-15.02
10.85
-27.78
-11.49
-21.03
-21.8
10.22
7.83
7.14
4.9
-24.04
10.49
9.83
9.8
12.75
5.76
9.95
8.05
6.38
7.45
-14.62
-30.51
5.91
-17.42
5.91
-13.92
-20.1
-30
-8.53
-5.35
-29.39
-22.64
-12.9
8.97
1.45
-21.01
0.79
7.85
6.53
9.53
-21.37
-33.32
10.63
9.93
6.92
-15.96
-20.93
6.16
3.68
9.06
5.24
-11.99
-17.69
-35.95
-20.25
-44.44
-29.56
10.44
6.08
5.78
5.87
9.87
-43.9
-19.33
-14.23
8
-31.62
-19.73
-19.73
-18.88
7.99
-35.01
-20.62
12.84
-10.58
-13.03
-8.64
5.31
6.79
-21.63
-20.29
-9.94
-9.73
8.49
9.13
9.89
10.18
-41.94
-17.06
13.16
9.34
-16.98
-18.36
9.15
9.85
-24.5
6.45
-24.27
-26
-32.08
10.52
7.26
-1.18
6.97
-22.06
-35.09
-14.56
-19.57
-9.46
-25.42
-18.38
5.82
-12.56
7.93
7.54
-16.61
-26.22
-6.09
-15.11
-4.75
-25.21
-21.68
8.59
10.12
-38.07
-33.74
-28.51
-12.53
-35.83
8.07
-14.88
-6.47
-36
7.89
-9.01
7.79
4.89
8.45
8.29
-20.35
-30.78
3.88
-20.59
4.84
7.51
4.35
-15.42
-44.21
-9.19
8.54
0.67
5.99
-18.16
-20.19
-18.16
-18.16
-19.79
-23.47
-22.38
12.98
-2.45
-20.74
-31.85
11.2
10.93
-11.36
-25.66
-36.03
-16.29
6.68
9.85
-10.3
-18.6
-15.41
-23.91
-23.53
5.78
11.95
-3.83
-1.87
-7.65
-17.73
-22.16
3.78
-12.91
10.41
-19.74
-40.93
-4.21
8.82
10.6
-26.09
7.97
-27.09
-30.65
-18.25
4.26
9.71
7.93
8.12
10.82
-31.82
-18.39
-20.67
-33.6
-17.41
-13.63
8.79
7.57
8.2
-20.76
-16.25
-24.65
-20.89
-7.83
11.94
8.22
2.85
11.45
8.21
9.33
-16.07
-31.61
-21.95
-27.3
-19.5
-29.55
-14.87
8.01
6.86
-12.94
-11.93
-38.12
5.36
-12.9
-31.03
-13.28
7.15
9.88
5.8
-1.54
-9.05
-26.11
-18.25
8.12
1.94
8.86
-10.99
3.03
10.47
-11.96
9.16
12.73
-17.65
4.97
5.64
10.51
-3.02
-14.75
-19.25
-29.02
-24.14
8.4
-22.79
10.2
6.71
-21.01
-17.73
9.9
-19.25
8.92
-31.63
-3.42
-4.09
-10.6
-19.63
-20.57
-10.49
-17.2
-6.14
-6.93
-6.93
6.43
7.71
-20.04
1.81
6.96
-29.28
-9.68
9.86
2.17
5.5
0.36
11.27
10.39
6.57
8.6
8.65
7.46
-4.04
-4.55
7.93
10.41
-3.89
-6.8
7.41
-23.7
-21.4
0.3
-22.79
-11.04
-7.62
8.37
10.77
12.82
-32.88
-17.62
8.59
7.21
7.88
5.69
7.6
-3.02
8.36
5.88
12.32
-2.12
-5.65
-3.16
-4.99
1.68
7.82
11.3
-24.04
10.49
10.41
-15.64

## Sheet: A5ss_1st5ss
ctrl	ACs	ATCs	AOCs	tDASGs	oDASGs
-4.63	5	-20	5	-5.35	-20.78
-9.01	-11.75	-5.68	-11.75	3.12	-20.78
-18.11	2.05	6.53	2.05	-18.11	1.89
6.55	7.7	6.84	7.7	-13.81	9.37
1.99	6.52	-20.25	6.52	-7.11	-2.38
-10.08	4.95	8.6	4.95	-7.11	1.59
-0.33	-2.57	4.46	-2.57		4.22
7.9	9.1	5.13	9.1		8.4
4.29	-13.1	7.81	-13.1		-2.57
8.73	-14.78	0.09	-14.78		-2.57
-8.5	7.77	-11.8	7.77		4.94
10.93	-17.9	7.94	-17.9		5.29
-9.8	7.61	6.36	7.61		-10.24
7.97	1.1	8.38	1.1		-10.24
-7.29	9.46	-16.13	9.46		-17.99
-1.37	-14.9	-16.4	-14.9		9.46
10.77	-10.4	8.89	-10.4		-1.5
7.81	-11.51	4.46	-11.51
6.66	-16.53	8.34	-16.53
6.04	-8.46	6.59	-8.46
5.59	5.99	1.64	5.99
-11.05	8.92	9.45	8.92
6.21	4.22	-2.05	4.22
-19.44	-15.56	8.59	-15.56
-6.78	1.91	-14.74	1.91
6.18	-7.02	6.99	-7.02
8.04	9.48	6.51	9.48
-15.53	1.98	-2.56	1.98
-20	4.41	-16.16	4.41
10.05	-1.28	-15.26	-1.28
6.8	-18.09	-18.11	-18.09
-13.63	7.67	-1.28	7.67
9.46	7	-7.11	7
5.39	-19.26	9.8	-19.26
3.35	-10.22	5.76	-10.22
-4.04	-20.78	7.33	-20.78
-12.3	-12.49	3.12	-12.49
9.81	-3.84	-13.57	-3.84
7.66	10.57	-5.35	10.57
2.56	-7.64	-2.05	-7.64
5.28	9.45	10.22	9.45
-10.14	-10.24	-10.4	-10.24
-12.71	-12.71	8.49	-12.71
-5.68	9.46	-17.2	9.46
10.22	-17.99	8.37	-17.99
9.6	-18.32	5.29	-18.32
5	-1.5	8.68	-1.5
-7.48	-17.47	8.24	-17.47
-17.7	4.94	-13.81	4.94
9.5	5.29	-14.05	5.29
6.77	-10.4	-2.55	-10.4
-8.86	5.37	4.95	5.37
5.57	9.37	-24.5	9.37
6.62	-6.09	-7.65	-6.09
6.53	-10.04	1.98	-10.04
-7.17	-1.37	5.73	-1.37
8.95	-5.52	-10.62	-5.52
1.48	-3.46	5.61	-3.46
-8.17	5.27	-14.57	5.27
6.84	-2.38		-2.38
-9.03	-6.09		-6.09
-1.77	-13.52		-13.52
6.03	8.56		8.56
-3.46	8.4		8.4
7.75	-9.97		-9.97
5.22	7.91		7.91
-2.91	6.36		6.36
-11.96	8.68		8.68
7.09	1.49		1.49
7.46	-17.01		-17.01
-22.63	-3.16		-3.16
4.51	4.3		4.3
-20.25	1.89		1.89
7.64	-0.66		-0.66
8.6	10.1		10.1
7.82	4.22		4.22
2.05	8.3		8.3
7.05	4.94		4.94
7.16	5.29		5.29
1.87	11.08		11.08
8.56	5.25		5.25
8.99	9.16		9.16
4.33	1.59		1.59
4.46	-4.39		-4.39
-8.4	7.61		7.61
7.7	5.73		5.73
6.52	-13.82		-13.82
5.13	6.83		6.83
7.87	10.77		10.77
5.67	4.89		4.89
7.8	6.04		6.04
-16.13	-20
-18.65	-5.68
3.07	6.53
6.69	6.84
0.39	-20.25
0.56	8.6
-16.67	4.46
-3.72	5.13
-16.32	7.81
7.97	0.09
7.16	-11.8
4.95	7.94
3.06	6.36
-11.89	8.38
-11.48	-16.13
-8.71	-16.4
-2.57	8.89
9.1	4.46
9.6	8.34
8.16	6.59
10.08	1.64
6.38	9.45
2.67	-2.05
-13.1	8.59
7.81	-14.74
-12.59	6.99
5.97	6.51
-18.08	-2.56
8.14	-16.16
-14.7	-15.26
2.81	-18.11
10.05	-1.28
7.4	-7.11
-11.69	9.8
-3.09	5.76
-4.15	7.33
8.37	3.12
8.02	-13.57
-13.84	-5.35
-12.2	-2.05
-14.78	10.22
-2.77	-10.4
7.77	8.49
7.33	-17.2
-17.9	8.37
-11.13	5.29
-4.49	8.68
-10.24	8.24
-3.9	-13.81
10.13	-14.05
9.16	-2.55
7.61	4.95
-7.28	-24.5
3.39	-7.65
-12.27	1.98
6.42	5.73
-11.48	-10.62
7.61	5.61
7.67	-14.57
8.34
1.1
-14.85
-7.43
7.23
10.06
4.14
-18.26
-11.64
-5.32
9.55
8.14
5.29
-11.02
4.62
-10.16
9.46
0.09
-16.45
4.61
4.29
-14.9
-11.8
-10.4
9.16
1.49
7.94
5.07
9.49
-8.88
-0.92
-11.51
-8.38
-12.95
2.58
-0.1
7.39
-16.6
-9.33
6.36
-16.53
-5.2
-7.3
-12.06
7.76
-16.91
2.69
8.38
4.58
5.41
8.35
9.89
-6.44
-14.99
-8.46
-9.26
-10.06
7.29
2.31
4.41
-7.78
-16.13
2.69
-17.99
7.3
5.99
2.57
-14.84
-15.01
1.07
6.62
-2.06
-14.32
10.77
6.32
0.85
-20.62
-1.83
-19.56
7.09
-1.59
8.92
6.37
8.3
-13.73
-20.29
4.68
-16.4
7.66
-15.16
9.1
-18.2
-11.16
8.89
-2.83
7.2
6.56
6.52
-9.71
8.92
4.46
-3.72
7.25
-11.16
8.34
-15.56
-7.55
8.14
1.91
-16.43
-7.02
8.63
9.48
5.88
8.88
8.68
-3.56
8.56
-12.65
-9.86
-4.57
-11.74
-8.13
6.05
1.98
-12.43
6.46
2.98
10.57
6.6
4.41
-10.24
-1.28
5.74
7.75
-7.55
-12.51
6.59
1.64
9.07
-0.92
-8.44
9.45
-18.09
-10.95
8.99
-17.88
9.6
4.58
3.16
5.58
-2.05
-10.24
7.61
-13.19
-2.05
9.63
-17.07
8.65
5.26
4.87
6.99
0.38
8.59
9.88
-14.74
-6.08
6.99
6.38
8.94
6.99
6.99
-16.91
8.04
-16.36
-16.78
-10.57
5.56
2.45
9.25
2.83
7.67
-11.36
-1.25
5.85
7
9.88
-19.26
-10.22
-16.33
-11.69
-9.15
9.06
5.99
-8.08
-3.4
2.32
7
5.2
6.84
-17.83
2.02
-4.73
-13.12
-13.58
9.46
6.51
-8.88
10.77
9.1
9.1
-2.56
-7.48
-16.16
2.19
10.26
4.94
-13.17
7.77
8.04
-8.41
-20.67
-9.54
-31.47
-16.17
-4.74
-15.26
-10.57
-6.71
-11.91
-6.71
6.96
8.73
-18.88
-11.54
7.74
-1.86
-19.56
-6.51
-12.49
8.3
-8.37
9.72
-3.84
7.04
-6.86
-23.31
7.96
10.57
-15.32
-1.41
-5.31
-7.67
7.64
9.54
6.6
7.73
-11.91
9.1
7.79
-1.28
-7.64
9.6
-10.33
9.63
1.16
9.11
7.76
8.66
-3.27
8.68
7.2
-11.91
9.45
-13.02
-12.71
6.76
-30.71
-17.43
9.44
10.49
-15.05
-2.83
-18.07
8.88
10.51
8.98
-12.44
9.39
-4.99
-16.59
9.46
1.4
5.93
4.3
-4.94
-4.84
-15.02
-7.11
-17.99
5.39
1.48
6.13
-20.63
4.85
-17.96
-3.27
1.67
-22.18
-5.55
6.38
9.8
7.58
-18.32
7.66
-12.61
-4.84
-9.99
-17.97
2.49
-15.18
6.85
-14.31
7.15
3.97
9.63
4.54
1.07
-18.31
-19.5
6.84
6.33
5.76
9.26
9.6
-2.63
10.28
6.3
6.91
8.41
-11.48
9.86
11.45
-12.11
6.23
-12.4
-5.84
-21.87
2.85
7.33
1.27
6.6
-12.33
7.85
8.16
8.73
6.99
3.93
6.36
-15.37
10.49
1.32
9.07
3.1
-11.34
-12.33
-16.68
8.34
6.92
4.08
-17.47
-13.28
1.96
3.1
-8.88
-21.47
0.48
8.93
3.47
7.82
4.58
4.94
-9.5
-10.34
-23.13
-4.31
6.42
8.34
-10.4
10.07
5.37
0.39
-19.87
1.14
-4.15
-21.33
9.37
9.6
-0.83
-10.88
-21.33
-4.46
2.07
6.29
8.28
0.92
-12.72
-6.09
-24.04
-0.02
1.31
7.16
3.54
-13.57
-18.5
-7.25
6.46
5.9
-2.05
8.4
9.85
-15.28
8.76
4.57
8.41
-19.33
0.92
5.98
10.22
-8.31
-7.4
10.49
-5.43
-18.15
4.33
6.42
7.36
7.13
-9.93
-14.96
-18.11
-10.04
-12.76
7.39
3.5
-1.37
-5.52
-3.46
-13.72
3.85
5.27
-7.12
-7.08
-20.35
-15.42
-9.95
4.32
5.2
-16.2
4.9
2.99
1.17
-10.4
-12.5
-11.54
-13.71
1.76
11.81
-9.91
-9.99
-1.69
7.7
-11.58
7.41
0.89
7.27
-6.09
-12.13
-20.03
-12.13
-15.19
-0.24
4.2
7.37
-14.42
8.51
-8.74
-8.5
2.05
-18.81
5.45
-11.69
-13.52
2.81
-12
-9.16
-13.47
7.2
5.87
-15.37
8.16
9.21
2.45
2.3
5.96
-13.84
4.69
4.29
8.56
-7.78
6.57
-14.92
-13.49
4.17
6.43
6.68
-14.45
9.04
3.1
-22.36
-8.69
-14.59
-0.19
7.8
5.2
6.77
-9.97
-7.99
5.42
-12.78
7.91
4.52
-14.61
-2.31
-14.87
-14.57
-10.89
1.18
6.36
8.68
0.12
6.13
-19.87
9.14
1.49
-12.4
-17.01
-5.32
6.63
8.49
-16.89
7.07
-9.99
-8.69
-9.5
-0.35
-9.56
-3.83
-11.3
-17.2
-3.16
9.35
2.37
7.16
4.3
5.99
-16.67
4.68
8.62
-0.66
7.68
-6.58
4.15
10.1
0.64
9.1
7.91
2.56
8.37
9.33
-19.99
2.83
-2.05
9.37
4.22
8.3
9.27
8.72
-21.95
7.79
9.22
4.94
5.29
7.21
2.33
8.68
8.4
-14.87
7.44
-0.76
-14.01
-11.51
-10.65
-21.58
-21.42
-13.29
11.37
3.86
1.97
-11.45
-13.81
9.91
-11.2
4.79
7.43
5.64
3.34
10.52
3.34
9.88
9.88
8.04
10.16
-14.16
-17.75
-18.32
2.84
6.05
-3.3
-13.19
-0.9
-10.82
8.24
2.36
5.99
8.27
-12.15
3.97
11.08
6.38
11.45
-12.12
-14.05
-0.26
-2.55
5.25
9.16
8.23
8.56
2.53
-15.2
4.95
-24.53
-24.5
-4.39
-7.65
-13.46
8.68
1.98
-10.45
5.39
-11.52
5.02
-28.35
7.61
5.73
7.41
7.15
-13.82
-10.62
1.34
3.77
-11.51
5.45
-2.05
6.64
6.83
-9.93
4.81
3.27
-9.97
4.84
10.77
8.59
-17.8
-17.93
-14.78
10.22
-7.28
-4.65
5.61
3.01
7.79
-14.97
9.1
9.1
4.89
7.38
-2.95
3.1
1.31
8.68
6.91
9.08
-1.37
-14.57
-8.69
9.1
9.22
8.4
-0.76
6.04
-10.9
7.29
1.48
9.48
-10.89

## Sheet: A5ss_2nd5ss
ctrl	ACs	ATCs	AOCs	tDASGs	oDASGs
-9.56	9.39	-18.99	9.39	-19.5	-7.78
3.61	-13.83	-7.46	-13.83	8.41	-7.78
-17.06	1.3	8.02	1.3	-14.87	5.07
-1.19	8.95	10.08	8.95	-3.51	7.46
7.98	-1.13	-21.85	-1.13	-14.59	-10.09
-11.97	2.05	7.76	2.05	-15.02	-14.19
0.53	-15.82	2.76	-15.82		10.07
8.82	-8.71	3.25	-8.71		7.93
9.82	3.39	-20.83	3.39		-8.71
8.42	-1.77	-1.25	-1.77		-15.82
-21.22	-13.31	2.45	-13.31		8.33
7.13	7.35	7.43	7.35		8.33
-22.59	-13.68	3.4	-13.68		-13.16
8.88	8.49	9.44	8.49		-13.02
-1.37	-18.3	-14.85	-18.3		-11.69
-2.23	9.79	-16.05	9.79		9.79
7.81	-11.36	8.88	-11.36		7.29
4.2	-1.24	1.82	-1.24
8.1	-8.5	0.67	-8.5
-21.31	-12.3	10.06	-12.3
7.31	-18.15	-14.65	-18.15
-12.94	-17.51	8.94	-17.51
9.85	6.64	-20.55	6.64
-9.56	10.07	3.77	10.07
-6.44	-7.62	-15.15	-7.62
8.1	8.27	7.38	8.27
4.87	-12.06	5.02	-12.06
-17.85	6.84	4.69	6.84
-18.99	5.52	-14.23	5.52
7.66	0.76	-13.93	0.76
-1.6	8.1	-14.87	8.1
5.54	-12.59	6.22	-12.59
7.82	9.63	-14.59	9.63
8.95	8.56	-15.02	8.56
1.3	-21.18	6.77	-21.18
-9.72	1.56	9.04	1.56
-10.07	-7.78	5.88	-7.78
9.79	-0.31	8.41	-0.31
8.78	6.37	-17.87	6.37
10.03	7.63	-19.5	7.63
3.32	-15.66	-14.97	-15.66
-12.06	9.45	10.57	9.45
-7.28	-13.16	-0.19	-13.16
-7.46	-13.02	8.1	-13.02
10.77	-13.7	1.07	-13.7
8.44	6.57	2.66	6.57
9.39	-11.69	8.73	-11.69
1.49	-13.35	6.38	-13.35
-10.84	7.29	7.64	7.29
6.59	-18.81	-3.51	-18.81
9.82	8.33	-9.86	8.33
-8.14	-5.52	2.55	-5.52
5.56	7.68	3.49	7.68
5.84	7.46	1.59	7.46
8.02	-5.21	-0.66	-5.21
-6.18	-10.4	8.4	-10.4
9.01	-14.88	5.42	-14.88
6.62	-1.33	-20.99	-1.33
-12.44	-13.23	3.01	-13.23
10.08	1.34	-3.71	1.34
-9.27	-10.09	-11.89	-10.09
-9.8	-3.69		-3.69
7.57	-6.09		-6.09
-6	-20.31		-20.31
-0.62	6.69		6.69
-21.64	7.93		7.93
3.68	-2.5		-2.5
-11.51	10.91		10.91
-2.9	-3.25		-3.25
8.56	2.4		2.4
-22.74	-12.59		-12.59
-1.59	-5.35		-5.35
-21.85	-17.2		-17.2
10.47	7.56		7.56
7.76	5.07		5.07
6.03	-1.98		-1.98
1.3	5.37		5.37
9.73	7.26		7.26
1.96	9.4		9.4
4.88	8.33		8.33
5.5	6.43		6.43
5.93	2.44		2.44
3.49	8.83		8.83
2.76	-14.19		-14.19
-8.5	-25.5		-25.5
8.95	5.73		5.73
-1.13	5.42		5.42
3.25	-11.48		-11.48
8.31	4.24		4.24
3.6	-5.28		-5.28
8.95	8.68		8.68
-5.73	-18.99
-13.04	-7.46
4.2	8.02
7.93	10.08
7.64	-21.85
0.66	7.76
-1.73	2.76
-21.43	3.25
-11.42	-20.83
9.65	-1.25
2.91	2.45
2.05	7.43
3.68	3.4
-15.2	9.44
-11.89	-14.85
-15.82	-16.05
-8.71	8.88
3.39	1.82
3.01	0.67
3.69	10.06
7.77	-14.65
5.66	8.94
7.4	-20.55
-1.77	3.77
-20.83	-15.15
-13.67	7.38
0.28	5.02
-10	4.69
6.25	-14.23
-15.07	-13.93
9.46	-14.87
4.8	6.22
10.19	-14.59
-3.09	-15.02
-11.88	6.77
-9.73	9.04
7.85	5.88
9.11	8.41
-2.95	-17.87
-11.74	-19.5
-13.31	-14.97
-18.11	10.57
7.35	-0.19
9.78	8.1
-13.68	1.07
-10.36	2.66
-12.06	8.73
-2.57	6.38
-7.28	7.64
5.37	-3.51
10.51	-9.86
8.49	2.55
-15.11	3.49
8.35	1.59
-8.19	-0.66
8.28	8.4
-4	5.42
7.23	-20.99
8.91	3.01
8.76	-3.71
-18.3	-11.89
-9.23
-16.41
11.08
8.27
7.44
-7.43
-12.19
-9.92
-0.82
9.27
7.12
-7.43
8.35
2.5
9.79
-1.25
-12.2
3.31
6.95
-11.36
2.45
-1.24
4.42
-7.97
7.43
5.94
5.95
-12.62
3.77
-8.5
-0.63
-17.65
5.85
6.34
6.64
-5.02
-18.42
3.4
-12.3
0.94
-8.41
-13.69
5.87
-20.67
0.01
9.44
9.22
4.06
9.88
1.02
-17.02
-2.9
-18.15
1.01
0.48
1.36
7.22
0.76
-12.47
-14.85
-1.91
-4.89
6.39
-17.51
6.43
-1.71
-20.16
1.07
9.6
-10.76
-8.75
9.65
3.3
-1.15
0.19
8
-9.63
4.23
-0.26
6.64
8.91
8.88
-13.17
-7.29
7.04
-16.05
3.32
-10.92
8.92
-16.22
-14
8.88
3.98
7.42
4.51
8.4
-20.19
-10.83
1.82
-2.95
8.59
-10.39
0.67
-7.62
-2.95
1.88
8.27
-18.3
-12.06
10.47
6.84
3.71
6.64
2.87
-15.96
8.4
-14.26
-13.26
-9.86
-8.17
-10.91
5.87
5.52
-0.8
9.16
5.19
9.43
4.58
0.76
-11.8
8.1
3.64
4.36
-7.08
-21.01
10.06
-14.65
-7.14
-0.01
1.48
8.94
-12.59
-5.91
4.51
-10.6
7.09
7.65
-10.24
0.92
-20.55
-20.09
7.94
-11.36
-11.8
10.1
-8.3
7.61
6.99
8.28
1.97
-6.71
3.77
9.3
-15.15
-13.89
7.38
9.06
9.2
6.99
10.93
3.61
7.79
-12.06
-5.85
-2.44
10.08
5.9
6.96
-26.47
9.63
-5.52
4.22
4.36
8.56
2.28
-21.18
1.56
-16.21
-13.93
-20.35
9.49
-21.42
-12.12
7.79
-9.48
4.59
7.2
-17.53
-15.12
1.57
-7.56
-15.27
-13.58
8.94
5.02
-2.63
8.68
9.1
9.1
4.69
-18.98
-14.23
9.25
9.94
7.13
-17.81
6.96
2.34
2.34
-15.05
-8.88
-4.53
-14.27
-11.45
-13.93
-12.76
-9.81
-4.85
-15.15
6.05
6.82
-10.56
-12.44
6.96
4.34
-14.73
-13
-0.31
2.7
-16.27
0.11
6.37
7.96
-12
-15.39
8.94
7.63
-12.2
-29.39
-3.27
1.69
7.64
6.57
7.73
2.27
-13.39
7.61
1.54
6.22
-15.66
9.6
-9.97
-3.84
3.6
3.3
7.12
5.56
-11.8
7.63
9.54
-13.67
9.45
-13.16
-13.7
7
-8.56
-13.14
9.37
7.44
-1.05
2.36
-8.88
5.89
9.26
-0.25
-11.77
9.07
-14.26
8.16
6.57
7.79
5.99
7.23
1.5
-3.09
-14.59
-15.02
-11.69
2.94
5.56
9.21
-14.85
6.57
-8.48
-17.43
1.05
-5
-16.8
7.8
6.77
3.87
-13.35
9.8
-13.39
-10.7
-4.84
-11.22
9.01
9.07
8.53
-17.5
8.24
5.63
9.2
2.57
-13.07
-0.23
-13.67
7.65
9.07
9.04
5.79
9.54
3.22
8.89
8.88
2.42
7.77
-2.06
6.58
6.52
-1.5
4.29
-10.07
-15.15
-16.36
7.07
5.88
6.6
6.04
-24.04
4.81
5.57
6.51
6.91
7.45
6.8
-13.28
8.08
1.07
10.49
5.38
-5.76
-14.68
-13.39
10.19
6.9
-1.62
-18.81
-17.47
4.82
5.87
-4.02
-9.31
-8.76
3.47
5.91
7.3
9.67
5.29
8.33
-6.18
-11.02
-21.21
-21.74
6.87
4.54
-5.52
6.56
7.68
3.78
-17.4
-2.15
-7.08
-11.74
7.46
4.58
4.52
-12.71
1.07
-15.21
7.37
5.69
8.82
-1.6
-8.56
-5.21
-12.65
-9.54
3.16
8.42
-11.24
-17.87
-11.74
-18.07
8.92
-3.61
-14.97
1.69
7.76
-5.08
4.57
5.02
9.81
-16.75
4.53
6.66
10.57
-11.36
-9.31
7.64
-10.7
-5.43
3.49
7.4
7.36
4.36
-1.43
-7.95
-25.34
-10.4
-13.67
3.55
-5.7
-14.88
-1.33
-13.23
-25.19
4.44
1.34
-21.43
-21.8
-12.4
-14.26
-15.32
2.87
4.3
-0.85
7.96
7.33
5.9
-0.19
-16.02
-7.74
-14.73
-14.39
8.18
-12.61
-14.7
1.69
7.3
-12.25
6.56
-12.94
8.38
-3.69
-6.09
-12.13
-12.13
-12.13
-12.13
-5.43
-3.15
1.75
6.99
-11.07
-7.86
-11.13
-11.42
-16.26
-14.65
-0.35
-7.24
-20.31
-4.76
-13.04
-12
-2.17
8.55
5.5
-20.55
2.1
8.62
-5.47
1.48
5.46
4.67
-5.92
6.29
6.69
-13.19
1.82
-2.05
-12.39
-23.4
-31.83
7.97
-8.07
5.87
-21.33
-14.99
-18.31
-18.81
-0.19
10.06
8.73
2.49
-2.5
-17.34
-10.99
-7.29
10.91
5.19
-8.51
-14.08
-14.87
-11.89
-12.83
4.52
-3.25
2.4
1.57
2.49
-11.34
3.28
-12.59
-15.39
-5.35
-7.74
7.43
8.1
-12.53
5.85
-9.97
1.46
-12.36
-2.56
-14.7
-4.57
-8.4
1.07
-17.2
2.37
2.7
9.26
-1.59
7.56
7.64
-5.21
4.84
8.14
-1.98
9.27
-13.83
2.37
5.37
-0.83
10.49
2.37
2.53
2.66
3.2
-7.62
10.27
2.52
4.51
7.26
9.4
8.95
7.2
-14.99
6.63
7.44
5.29
8.33
5.9
-12.4
6.38
1.96
-10.33
7.31
-14.36
-20.16
-12.59
-9.46
-7.78
-7.4
-15.37
6.84
8.4
1.24
-8.93
-11.24
9.3
-5.65
6.44
7.06
7.26
8.89
-10.91
6.76
8.35
6.77
6.77
7.82
8.07
-4.86
-16.13
-13.39
3.16
-1.34
-11.51
-9.16
-0.25
-5.84
7.64
6.38
6.32
10.13
-5.76
7.8
6.43
6.8
5.32
-11.74
-9.86
-11.3
2.55
2.44
8.83
6.96
4.42
8.27
2.33
3.49
-13.93
-14.19
1.59
-25.5
-0.66
-11.37
11
8.4
-24.95
4.75
-10.24
8.68
-34.74
5.73
5.42
3.3
4.74
-11.48
-20.99
3.1
5.85
-14.54
2.63
-8.41
3.61
4.24
2.98
-14.74
7.1
-12.66
3.49
-5.28
10.08
-12.97
5.23
-9.7
10.77
1.33
-17.68
3.01
-3.71
8.68
-0.19
9.1
9.1
8.68
7.38
-14.65
5.38
3.16
8.42
4.14
-16.89
-14.88
-11.89
1.46
10.49
7.44
1.96
-8.39
6.04
-4.23
5.93
5.56
1.43
-11.48

## Sheet: ES_5ss
ctrl	ACs	ATCs	AOCs	tDASGs	oDASGs
6.89	-12.06	11.08	-12.06	-2.77	9.09
4.96	-12.96	5.8	-12.96	-10.56	9.06
10.67	9.79	10.49	9.79	4.82	7.7
7.77	8.2	9.12	8.2	10.06	10.67
8.35	9.04	9.15	9.04	8.39	-11.51
8.08	10.28	10.03	10.28	9.25	-18.15
10.65	-13.46	9.25	-13.46	-11.83	-15.82
2.78	-18.3	8.39	-18.3	-8.69	-20.78
7.36	-18.01	-4.89	-18.01	-4.57	-4.39
7.83	-11.8	-1.5	-11.8	-14.78	-10.92
6.64	-10.4	-6.72	-10.4	-13.6	9.06
4.23	1.07	-12.94	1.07	-10.36	9.63
8.58	-4.16	-11.05	-4.16	-16.59	-2.4
9.67	-8.08	7.16	-8.08	-14.01	-8.39
4.47	-11.34	9.89	-11.34	-6.65	3.35
-9.97	-11.69	7.96	-11.69	-11.57	10.03
0.67	-11.29	7.07	-11.29	-17.77	7.2
6.79	-2.05	7.33	-2.05	-21.85	9.65
-5.85	9.49	9.1	9.49	4.94	8.68
-0.97	7.33	9.45	7.33	8.68	7.39
9.25	10.51	6.84	10.51	9.06	-13.19
7.53	8.38	-13.84	8.38	8.14	-3.13
3.54	-12.2	-12	-12.2	9.81	8.56
-12.82	-10.15	7.3	-10.15	7.2	10.13
-14.87	-15.97	7.84	-15.97	8.95	-9.8
-15.5	-10.31	6.43	-10.31	10.08	-21.44
6.97	9.78	10.08	9.78	8.72	0.5
10.15	8.56	-18.17	8.56	7.3	1.94
4.41	-6.62	-4.86	-6.62	-5.04	-10.7
8.68	-7.4	7.03	-7.4	-0.4	2.34
-15.44	-11.58	1.23	-11.58	6.29	8.04
7.97	-8.58	0.13	-8.58	10.17	10.1
-11.77	-6.54	0.8	-6.54	-6.64	7.33
9.45	-8.4	-15.4	-8.4	-6.99	9.49
-8.88	-17.01	-18.31	-17.01	7.65	5.69
6.66	-15.59	-6.65	-15.59	9.79	8.23
-11.31	9.07	-11.57	9.07	4.94	-2.8
-18.74	7.61	-17.77	7.61	7.88	-11.77
-12.06	6.66	-21.85	6.66	2.83	3.64
-5.94	6.95	0.67	6.95	5.73	9.1
-13.19	9.81	-0.4	9.81	-5.2	-21.44
-13.28	6.46	-9.27	6.46	1.07	-14.26
10.08	-3.27	-5	-3.27	-10	10.03
10.24	-6.62	-8.9	-6.62	-12.11	7.07
8.94	-5.3	-3.69	-5.3	-15.8	10.07
7.3	-0.81	-4.89	-0.81	-11.45	8.72
-4.57	8.73	-5.68	8.73	5.59	9.78
0.1	8.23	-10.92	8.23	3.81	7.64
-10.62	5.69	-5.4	5.69	9.66	-9.16
-12.69	2.29	-6.62	2.29	8.68	-12.79
-12.66	-19.77	-5.3	-19.77	7.69	9.35
2.53	-18.11	-10	-18.11	9.11	7.14
10.15	10.88	-6.41	10.88	8.38
9.35	5.75	-8.17	5.75	8.54
4.72	-7.78	-14.99	-7.78	-11.37
5.49	-11.02	8.7	-11.02	-7.51
4.01	7	-2	7	-11.12
7.75	7.66	-0.81	7.66	-9.26
10.47	0.45	8.73	0.45
-16.84	7	-4.08	7
-15.05	-16.64	7	-16.64
3.61	-7.02	10.65	-7.02
-9.01	-12.2	9.65	-12.2
-8.17	-15.01	-16.9	-15.01
-17.07	8.68	-4.86	8.68
-0.76	9.11	-10.55	9.11
-12.06	-21.44	-9.99	-21.44
-12.96	-14.26	-5.96	-14.26
7.39	10.12	-18.99	10.12
4.14	9.6	-3.56	9.6
6.53	-19.03	-18.81	-19.03
4.72	-14.26	-14.26	-14.26
-12.79	-7.43	-10	-7.43
-6.51	-6.51	11.08	-6.51
-15.59	6.6	3.71	6.6
-12.72	7.94	5.79	7.94
-18.32	4.96	10.1	4.96
3.16	10.08	7.2	10.08
10.49	-7.46	2.99	-7.46
10.49	-0.4	8.91	-0.4
10.11	8.88	7.46	8.88
7.12	10.77	8.56	10.77
5.99	8.33	10.77	8.33
10.12	8.56	9.46	8.56
9.06	-16.6	5.29	-16.6
-6.71	-5.52	7.77	-5.52
9.68	-0.34	-5.84	-0.34
-4.39	-8.4	-18.3	-8.4
-8.01	6.33	-8.58	6.33
7.09	8.02	-16.16	8.02
5.68	4.94	-15.08	4.94
9.6	7.94	-6	7.94
11.08	-4.04	8.05	-4.04
5.8	-18.07	8.53	-18.07
-15.26	8.94	7.33	8.94
-11.02	9.06	3.53	9.06
10.1	-14.65	-5.02	-14.65
7.79	-11.13	-7.83	-11.13
7.03	-2.57	11.45	-2.57
-3.58	-10.06	9.9	-10.06
2.57	9.72	8.88	9.72
-14.65	9.72	8.14	9.72
7.41	-12	10.13	-12
3	-3.04	8.19	-3.04
4.59	-14.6	8.94	-14.6
-11.75	-8.82	9.06	-8.82
-19.81	-16.59	10.67	-16.59
-21.85	-6.51	-8.38	-6.51
10.75	1.49	-17.43	1.49
5.24	-18.22	-5.02	-18.22
9.79	-15.82	-14.73	-15.82
8.2	-2.57	7.85	-2.57
-19.25	-6.09	1.99	-6.09
-16.49	-7.43	9.79	-7.43
-14.65	-0.55	9.06	-0.55
-7.28	-0.4	7.88	-0.4
-8.53	7.65	9.25	7.65
10.36	7.79	-11.31	7.79
6.38	9.65	-15.32	9.65
-11.8	-12.59	-12.25	-12.59
7.7	1.54	-4.02	1.54
10.13	8.76	8.3	8.76
-13.7	6.6	9.72	6.6
-17.33	8.41	7.29	8.41
-18.74	7.09	4.45	7.09
-16.9	-11.05	6.29	-11.05
-8.08	-11.05	6.87	-11.05
4.46	-2.8	-6.64	-2.8
9.04	-11.77	-6.99	-11.77
10.28	-15.26	-6.27	-15.26
10.67	-8.88	-5.66	-8.88
4.86	9.22	4.78	9.22
-9.8	10.67	9.72	10.67
-5.85	9.26	-8.82	9.26
-9.95	10.28	-3.51	10.28
-2.4	-11.91	11.81	-11.91
-6.84	-4.04	5.18	-4.04
3.65	8.17	-0.4	8.17
-3.56	1.61	-25.19	1.61
-4.07	3.46	8.1	3.46
-13.02	5.06	8.17	5.06
3.61	8.83	-2.68	8.83
-12.4	5.96	-15.05	5.96
8.63	-16.49	-15.8	-16.49
5.76	-6.9	-11.45	-6.9
8.88	11.08	-16.89	11.08
7.61	6.12	-8.88	6.12
8.59	-7.55	-11.83	-7.55
5.61	-11.89	-10.6	-11.89
1.7	8.88	-15.56	8.88
-14.95	3.39	1.28	3.39
-8.81	8.35	-12.64	8.35
-16.41	-1.39	-0.38	-1.39
-14.99	-12.71	-15.15	-12.71
-13.7	2.88	-14.26	2.88
-7.43	8.95	-5	8.95
-21.56	-15.11	-0.87	-15.11
-11.45	-9.99	-3.56	-9.99
-14.26	-17.67	7.12	-17.67
-9.15	-16.16	8.17	-16.16
-12.44	10.75	8.14	10.75
-1.69	8.27	8.34	8.27
-9.73	8.14	-8.46	8.14
-2.82	3.43	-11.27	3.43
-16.16	-1.5	8.59	-1.5
-16.84	-4.89	4.41	-4.89
3.5	-16.22	10.52	-16.22
8.54	-8.83	8.27	-8.83
-10.46	2.32	-10	2.32
-17.01	2.32	-12.5	2.32
11.08	9.73	-7.76	9.73
8.84	7.61	-16.89	7.61
8.3	-0.87	4.45	-0.87
7.79	-2.67	7.44	-2.67
0.79	-20.55	-7.03	-20.55
6.82	-14.7	-7.03	-14.7
3.35	-14.87	10.45	-14.87
10.36	-21.85	7.16	-21.85
11.01	-16.29	-13.07	-16.29
5.54	-0.4	-5.52	-0.4
6.59	7.29	9.78	7.29
8.4	3.73	10.9	3.73
-14.27	-13.26	8.76	-13.26
-21.85	-12.74	7.33	-12.74
-10.42	7.39	8.62	7.39
-7.22	8.68	6.36	8.68
-22.74	9.63	-7.22	9.63
-7.78	9.06	-14.26	9.06
-8.81	9.65	-7.83	9.65
-18	7.2	-13.69	7.2
-6.09	-14.42	-4.14	-14.42
-10.13	-1.81	-4.68	-1.81
-11.31	-11.02	7.33	-11.02
-12.72	-5.77	4.2	-5.77
8.73	-6.88	-8.15	-6.88
6.18	-7.12	-5.68	-7.12
10.75	-9.81	-16.13	-9.81
8.27	-14.6	-7.55	-14.6
-5.11	8.6	-11.89	8.6
-10.89	7.39	-5.08	7.39
-8.11	-5.35	-7.78	-5.35
-14.83	-10.27	7.39	-10.27
-6.18	-11.51	-0.99	-11.51
-12.06	4.11	-8.76	4.11
-22.74	-11.41	-7.64	-11.41
-17.93	-8.65	-13.84	-8.65
-12.23	6.06	-13.28	6.06
-8.4	9.6	-14.97	9.6
-10.55	-0.11	8.56	-0.11
-9.31	-12	8.14	-12
-25.19	10.77	9.33	10.77
-19.69	5.91	-16.49	5.91
3.97	10.03	-7.64	10.03
8.68	3.35	-11.27	3.35
8.68	7.07	-9.26	7.07
7.67	10.03	9.72	10.03
11.08	-6.86	10.06	-6.86
8.11	-5.41	9.05	-5.41
9.49	7.15	10.22	7.15
7.26	9.35	8.76	9.35
8.68	9.99	8.4	9.99
10.57	8.39	-16.26	8.39
3.12	10.29	0.1	10.29
8.7	7	-10	7
9.07	1.91	-12.11	1.91
9.05	6.62	-7.78	6.62
8.73	-12.06	-11.74	-12.06
8.55	-7.02	10.57	-7.02
8.27	4.07	8.68	4.07
5.68	7.04	-11.3	7.04
-14.26	-11.68	-14.7	-11.68
10.47	-10.55	-13.6	-10.55
8.31	-16.55	-13.03	-16.55
-18.21	-14.87	9.37	-14.87
10.49	9.22	6.92	9.22
9.12	9.85	8.94	9.85
6.21	7.7	8.55	7.7
6.46	4.46	7.82	4.46
11.08	9.16	1.07	9.16
8.35	-8.44	6.12	-8.44
-17.43	1.48	8.68	1.48
-7.28	6.36	-20	6.36
-14.62	8.73	-14.51	8.73
-17.67	1.96	-10.36	1.96
-9.54	7.33	-14.55	7.33
-21.22	-19.06	10.22	-19.06
-21.64	-18.31	5.73	-18.31
-8.81	9.06	-8.17	9.06
5.23	6.8	-8.83	6.8
10.51	9.1	-5.77	9.1
8.34	3.64	-13.02	3.64
9.55	11.11	10.86	11.11
7.7	9.65	8.24	9.65
6.99	-3.09	-8.08	-3.09
7.56	-13.93	-11.02	-13.93
8.31	-7.43	1.97	-7.43
-11.48	-21.22	2.32	-21.22
-1.5	-10.4	-12.59	-10.4
-15.11	-2.82	-3.56	-2.82
-26.14	8.63	-9.08	8.63
8.88	9.1	-16.29	9.1
1.9	9.81	-14.65	9.81
9.15	11.11	-8.83	11.11
10.03	-9.99	-6.51	-9.99
7.31	-16.64	-22.74	-16.64
7.79	6.31	-3.78	6.31
8.34	4.23	0.9	4.23
8.56	10.77	9.11	10.77
10.67	6.14	6.17	6.14
8.62	-13.69	4.81	-13.69
10.67	-10.57	-11.68	-10.57
6.31	-14.97	-6.65	-14.97
2.76	-14.97	0.94	-14.97
9.25	5.99	-5.2	5.99
8.14	3.21	1.07	3.21
7.83	-15.32	8.66	-15.32
9.25	-21.85	8.91	-21.85
8.69	-8.4	5.24	-8.4
3.85	-11.77	5.74	-11.77
8.28	-11.21	10.65	-11.21
-0.4	-18.31	5.11	-18.31
-14.7	8.92	-2.57	8.92
-10.46	10.67	-12.79	10.67
9.65	5.7	-11.37	5.7
8.27	-0.01	-7.51	-0.01
-8.4	-11.51	-17.96	-11.51
7.87	-18.15	-16.47	-18.15
10.67	11.08	-5.04	11.08
7.66	8.56	-0.4	8.56
9.6	-9.8	-11.31	-9.8
7.41	-21.44	-5.43	-21.44
-13.46	-19.44	-13.26	-19.44
-18.3	-10.56	-12.74	-10.56
7.22	-12.78	10.77	-12.78
9.65	-6.41	-0.16	-6.41
6.43	8.92	-11.02	8.92
7.13	9.72	4.49	9.72
7.7	-8.51	-11.68	-8.51
9.22	-14.42	-5.21	-14.42
8.83	-12.62	-13.07	-12.62
-1.5	-1.48	-20.41	-1.48
-9.57	8.76	-10.75	8.76
4.15	8.54	-7.78	8.54
8.47	7.22	8.68	7.22
9.54	6.14	9.66	6.14
4.29	-6.78	-17.07	-6.78
9.82	-13.81	-22.36	-13.81
-12.51	6.69	-4.11	6.69
-11.66	11.45	-12.47	11.45
-4.57	-11	6.66	-11
-20.54	-5.35	9.8	-5.35
-13.93	8.38	-13.67	8.38
-4.23	5.11	-15.37	5.11
-13.28	4.94	10.53	4.94
-11.27	6.9	10.22	6.9
-14.97	-15.82	7.36	-15.82
-4.02	-20.78	6.38	-20.78
-0.33	10.28	-9.02	10.28
-8.76	7.13	-13.46	7.13
-9.99	-8.69	-10.57	-8.69
-8.4	-11.54	-5.52	-11.54
-14.32	-14.88	-16.55	-14.88
6.14	-11.8	-12.73	-11.8
7.79	-1.96	2.34	-1.96
-6.47	-10.88	-15.05	-10.88
-5	7.14	-14.74	7.14
-11.31	9.35	-12.74	9.35
-15.58	-5.17	-11.8	-5.17
-19.65	-13.93	-10.56	-13.93
-7.35	10.9	9.06	10.9
8.92	3.24	4.86	3.24
8.85	-4.39	-8.83	-4.39
6.32	-10.92	-11.74	-10.92
-18.01	-16.49	8.07	-16.49
-11.8	-11.02	10.57	-11.02
-16.89	9.6	8.68	9.6
-11.13	4.57	8.59	4.57
-11.77	9.26	-6.69	9.26
-16.49	4.02	-13.71	4.02
-9.5	9.8	7.23	9.8
1.07	1.68	7.3	1.68
-14.67	-17.3	-7.2	-17.3
-10.14	-13.19	-12.25	-13.19
-8.88	-3.13	6.19	-3.13
-11.02	11.08	7.79	11.08
-11.28	9.04	9.3	9.04
-12.44	-11.13	6.45	-11.13
-10.82	-0.34	-15.97	-0.34
-4.66	-0.26	-11.97	-0.26
-7.35	-18.07	8.68	-18.07
-5.35	5.96	6.22	5.96
10.9	-5.63	-6.09	-5.63
4.79	10.67	-14.29	10.67
7.03	7.7	9.4	7.7
8.62	8.68	9.1	8.68
6.96	5.2	-8.4	5.2
10.03	1.53	-16.64	1.53
11.01	7.33	8.62	7.33
5.27	-11.77	5.95	-11.77
-10.4	-12.23	7.3	-12.23
1.07	-16.36	8.72	-16.36
-3.94	-12.82	7.48	-12.82
-13.81	11.08	7.79	11.08
-9.95	6.6	9.81	6.6
-21.22	9.22	6.12	9.22
-8.5	9.04	0.58	9.04
-18.22	2.55	-4.86	2.55
10.77	-18.3	-11.41	-18.3
7.39	-9.16	9.46	-9.16
6.66	-12.79	9.22	-12.79
9.8	7.44	8.76	7.44
10.47	9.72	10.47	9.72
8.88	8.31	-4.86	8.31
6.84	7.56	-4.77	7.56
-20.62	5.75	8.49	5.75
1.07	7.98	-5.75	7.98
8.68	8.88	9.11	8.88
9.43	6.36	5.25	6.36
10.75	-7.12	7.65	-7.12
8.4	-18.31	9.72	-18.31
11.08	-16.41	-9.54	-16.41
3.43	-7.64	-10.31	-7.64
10.07	-7.62	7.96	-7.62
8.88	-5.48	8.34	-5.48
9.22	9.21	9.66	9.21
6.05	9.79	8.95	9.79
-0.24	-16.64	9.48	-16.64
6.89	-8.4	9.04	-8.4
6.91	8.14	10.47	8.14
10.06	4.36	8.33	4.36
-11.88	-10.24	6.05	-10.24
-7.4	-18.3	8.68	-18.3
8.98	3.1	6.12	3.1
7.33	-13.35	5.37	-13.35
7.26	-18.32	-6.18	-18.32
8.17	-7.97	-3.09	-7.97
7.88	-16.49	-8.4	-16.49
10.47	-7.43	-3.08	-7.43
9.21	9.89	-18.07	9.89
8.54	8.78	-14.97	8.78
-4.86	-12.66	10.74	-12.66
-15.5	-11.02	8.3	-11.02
-11.69	-12.42	-10.57	-12.42
-12.65	-0.01	-13.28	-0.01
-17.43	9.27	9.21	9.27
-22.74	9.25	8.69	9.25
7.97	-15.53	8.85	-15.53
8.88	-9.58	6.86	-9.58
10.03	10.06	8.49	10.06
8.62	10.77	7.39	10.77
-16.53	-22.51	10.08	-22.51
-13.17	-5.52	0.67	-5.52
9.48	-13.57	7.66	-13.57
7.58	-1.73	8.91	-1.73
-11.66	-15.32	-8.4	-15.32
-18.03	-4.86	-5.84	-4.86
-14.37	-7.46	-11.79	-7.46
-16.47	-7.03	-6.16	-7.03
7.8	-4.99	7.62	-4.99
7.96	3.1	2.85	3.1
10.03	9.45	3.84	9.45
3	10.51	6.82	10.51
10.03	8.83	6.6	8.83
7.61	5.46	8.68	5.46
9.27	11.78	10.22	11.78
9.04	5.04	10.45	5.04
4.67	-10.7	9.43	-10.7
-8.32	2.34	5.88	2.34
-11.96	-12.83	10.74	-12.83
-3.13	-5.08	8.63	-5.08
-10.7	6.12	8.24	6.12
-4.04	5.96	9.1	5.96
-10.4	6.99	9.81	6.99
-18.27	8.95	11.11	8.95
9.25	10.13	5.56	10.13
6.05	8.56	6.06	8.56
6.49	6.6	8.54	6.6
6.66	-14.1	8.83	-14.1
8.1	-9.97	10.47	-9.97
4.47	-14.26	11.01	-14.26
-4.04	-7.6	3.93	-7.6
-6.16	-12.27	7.16	-12.27
-24.34	-9.15	5.24	-9.15
7.66	-2.4	8.59	-2.4
-13.93	-8.39	3.77	-8.39
-13.82	-20.69	9.3	-20.69
-8.67	-5.77	2.68	-5.77
-15.15	5.24	-0.37	5.24
6.04	8.76	7.2	8.76
-21.31	10.2	-11.88	10.2
10.29	9.49	-11.51	9.49
-6.03	-12.76	-11.75	-12.76
-14.26	-11.77	-11.14	-11.77
7.77	2.37	9.65	2.37
-12.65	7.84	10.03	7.84
-12.39	8.35	4.88	8.35
5.59	8.34	8.73	8.34
7.66	-25.64	11.11	-25.64
9.04	-8.88	-3.63	-8.88
-15.15	5.13	-16.16	5.13
9.25	10.03	-9.54	10.03
7.44	-12.86	-16.49	-12.86
-2.05	-18.31	-21.85	-18.31
-6.72	9.72	-16.29	9.72
10.74	10.74	-10.1	10.74
8.82	7.64	-10	7.64
-12.94	9.78	-12.2	9.78
-11.05	8.78	9.6	8.78
-8.88	9.45	7.44	9.45
-11.22	-9.95	-8.59	-9.95
-6.51	-12.85	-12.61	-12.85
-11.22	10.1	10.53	10.1
-4.86	8.04	-1.02	8.04
-18.11	-12.59	10.57	-12.59
-10.82	-21.11	9.5	-21.11
-15.15	-3.04	7.64	-3.04
-13.93	-16.64	5.29	-16.64
-24.93	-10.79	-12.66	-10.79
-12.51	-10.79	-15.32	-10.79
10.28	-7.56	8.83	-7.56
10.08	-16.43	5.54	-16.43
10.03	10.28	7.64	10.28
9.45	8.24	8.31	8.24
-14.16	8.28	11.08	8.28
6.21	7.43	7	7.43
9.85	8.68	2.28	8.68
-11.8	11.08	10.67	11.08
-5.85	1.1	9.88	1.1
-5.29	-5.92	-5	-5.92
10.28	-14.7	-8.49	-14.7
9.94	7.88	8.14	7.88
8.54	7.3	9.06	7.3
7.81	8.41	6.29	8.41
-8.9	9.81	9.08	9.81
-10.09	10.22	9.44	10.22
-0.66	-18.04	10.19	-18.04
-1.81	-13.07	9.11	-13.07
-10.42	9.16	5.04	9.16
-1.62	2.69	9.99	2.69
-12.12	9.89	11.78	9.89
-17.07	5.88	3.53	5.88
-15.32	7.61	7.52	7.61
-8.4	9.72	10.06	9.72
-5.36	-7.86	8.62	-7.86
-12.76	-3.27	-5.43	-3.27
9.88	1.94	-13.19	1.94
3.18	0.5	7.41	0.5
3.65	8.56	9.8	8.56
1.15	9.24	9.21	9.24
5.37	-3.51	10.03	-3.51
10.47	-13.46	-0.01	-13.46
10.53	-18.75	-24.04	-18.75
10.06	-6.09	-12.78	-6.09
7.8	-6.94	-7.78	-6.94
11.11	5.57	7.93	5.57
10.08	8.39	7.96	8.39
-6.78	7.88	0.55	7.88
-15.01	10.13	1.81	10.13
-3.27	-15.11	-6.06	-15.11
-8.1	3.44	-16.05	3.44
-1.59	7.2	-16.05	7.2
-2.05	3.14	-15.11	3.14
-11.37	10.91	-8.4	10.91
-13.93	8.83	-4.15	8.83
-7.78	9.22	-11.64	9.22
-10.32	8.88	-12.82	8.88
-16.29	2.93	7.88	2.93
-11.05	5.97	4.94	5.97
-3.56	-13.69	8.68	-13.69
9.14	4.11	2.39	4.11
8.14	-16.59	-11.41	-16.59
9.49	-14.1	-3.49	-14.1
-18.33	-13.08	-11.96	-13.08
-8.88	-22.74	-11.74	-22.74
-2.18	-14.87	-13.69	-14.87
-9.8	-10.56	-11.29	-10.56
-0.4	8.62	-11.83	8.62
-12.86	10.75	-8.69	10.75
-12.23	8.35	8.68	8.35
-8.88	6.99	-3.68	6.99
-1.48	8.2	-5.92	8.2
-3.56	8.88	-10.91	8.88
-11.37	-7.83	8.07	-7.83
-5	-10.5	4.06	-10.5
-21.49	6.25	-9.99	6.25
-10.7	8.83	-9.26	8.83
-5.4	10.4	9.88	10.4
-14.74	6.14	9.65	6.14
-3.84	6.36	-2.77	6.36
-4.16	3.14	-10.56	3.14
-8.08	1.1	8.24	1.1
-18.31	-19.81	4.59	-19.81
-11.07	10.47	-11.84	10.47
-6.18	9.11	3.07	9.11
-6.94	-12.2	-7.48	-12.2
-17.8	-14.69	-1.77	-14.69
-11.77	-13.76	8.78	-13.76
-11.34	-15.4	8.57	-15.4
-11.69	5.7	-13.6	5.7
4.52	-6.09	-10.36	-6.09
7.96	8.16	9.65	8.16
6.99	0.48	4.45	0.48
-18.31	-11.8	8.68	-11.8
-18.3	-5.68	10.45	-5.68
-7.17	9.06	6.25	9.06
-15.15	9.09	5.52	9.09
-18.65	-10.09	-11.83	-10.09
-17.74	-12.96	-16.49	-12.96
-7.64	-15.36	-2.91	-15.36
-11.69	-15.36	-12.59	-15.36
6.29	-15.36	-16.21	-15.36
9.09	10.1	9.07	10.1
9.72	11	4.82	11
10.07	-13.15	7.29	-13.15
9.22	-18.26	8.17	-18.26
7.93	-4.12	-16.49	-4.12
10.45	-11.91	-0.26	-11.91
0.68	9.04	8.56	9.04
5.46	7.68	8.28	7.68
9.6	7.41	-3.24	7.41
10.27	7.58	-16.49	7.58
9.11	7.41	7.7	7.41
-8.94	7.16	9.22	7.16
-2.52	-2.9	10.65	-2.9
-15.37	-16.64	3.53	-16.64
-8.65	-11.77	-13.36	-11.77
6.99	-14.92	-10.81	-14.92
10.65	9.06	7.09	9.06
4.51	9.26	8.66	9.26
8.56	8.17	5.23	8.17
-11.8	-4.98	-6.95	-4.98
-4.02	-15.39	-11.22	-15.39
9.63	7.51	-2.95	7.51
10.1	10.29	-11.13	10.29
7.96	6.05	-0.4	6.05
7.52	9.93	10.4	9.93
7.07	5.02	10.45	5.02
5.99	9.31	7.2	9.31
1.56	7.29	9.81	7.29
-2.8	10.67	-9.45	10.67
-12.12	9.22	-6.94	9.22
-6.41	9.6	-10.5	9.6
-18.11	-20.43	-8.5	-20.43
-5.09	-16.05	-5.11	-16.05
-19.81	-8.63	-2.48	-8.63
-15.11	-9.77	8.68	-9.77
-15.4	-17.81	8.83	-17.81
-4.89	-15.53	-16.29	-15.53
-14.55	1.07	-18.22	1.07
-15.53	-16.93	-5.86	-16.93
-10.02	5.61	-10.56	5.61
-12.96	9.16	-18.64	9.16
-16.91	7.38	-4.96	7.38
-20.78	8.49	-12.81	8.49
-11.97	7.36	-10.56	7.36
-12.15	9.6	-16.59	9.6
-11.91	-13.69	-12.79	-13.69
-12.78	-1.96	10.47	-1.96
-21.85	9.6	9.48	9.6
-4.54	-0.73	8.8	-0.73
7.54	8.72	9.72	8.72
7.79	10.07	8.28	10.07
-11.29	-14.87	4.72	-14.87
-2.05	-8.83	9.45	-8.83
-12.82	-1.77	7.15	-1.77
9.09	-10.24	9.22	-10.24
6.77	9.72	-6.09	9.72
-4.86	10.47	-8.81	10.47
-16.15	5.94	3.1	5.94
5	4.75	-0.01	4.75
7.43	8.7	-12.66	8.7
4.3	6.49	10.28	6.49
8.31	-10.55	9.1	-10.55
8.59	-10.4	7.35	-10.4
9.1	9.06	6.51	9.06
7.26	5.06	7.63	5.06
10.43	8.82	9.63	8.82
7.79	7.53	10.13	7.53
5.54	-16.15	7.12	-16.15
8.91	-8.69	-20.72	-8.69
8.38	-11.31	-4.63	-11.31
8.4	-19.5	-1.46	-19.5
-2.01	-10.01	-14.04	-10.01
7.82	-14.74	-11.12	-14.74
5.85	5.94	-9.26	5.94
5.85	7.38	9.43	7.38
10.43	-16.34	9.26	-16.34
7.2	-12.74	-14.99	-12.74
-15.05	10.86	-7.56	10.86
11.01	3.51	-8.4	3.51
11.45	9.6	-4.63	9.6
2.74	7.83	6.99	7.83
6.57	-16.49	8.72	-16.49
9.78	-18.22	-19.5	-18.22
9.81	10.67	-7.4	10.67
1.98	10.44	8.54	10.44
7.93	1.24	8.38	1.24
9.45	-7.64	-9.27	-7.64
-18.15	9.25	-10.09	9.25
-20.19	6.18	-11.09	6.18
-11.15	-4.02	-13.35	-4.02
-4.46	-12.06	3.1	-12.06
-14.35	-13.46	-2.07	-13.46
-2.07	10.75	6.99	10.75
-15.93	4.88	9.11	4.88
-14.75	8.56	10.24	8.56
7.33	9.09	3.75	9.09
9.1	-11.91	-13.82	-11.91
3.64	-12.65	-10	-12.65
10.67	-4.57	10.74	-4.57
8.99	-11.75	4.86	-11.75
7.13	-1.59	8.77	-1.59
-10.27	-13.93	3.56	-13.93
-3.27	-11.13	7.34	-11.13
-12.02	-15.36	7.2	-15.36
-11.69	10.52	7.3	10.52
10.65	7.66	10.07	7.66
10.51	4.8	6.93	4.8
3.5	5.43	7.96	5.43
8.38	-8.09	10.1	-8.09
10.07	-8.15	10.24	-8.15
9.07	10.03	-2.77	10.03
9.94	6.66	4.46	6.66
6.8	10.11	-8.9	10.11
10.06	8.56	-7.48	8.56
11.01	2.63	10.06	2.63
-3.09	-14.27	4.82	-14.27
-3.09	-11.8	-13.07	-11.8
3.1	11.01	-18.3	11.01
-4.66	10.08	-13.03	10.08
-13.83	8.4	-11.97	8.4
-3.27	6.13	7.04	6.13
-15.15	6.62	4.57	6.62
-16.05	-5.28	9.45	-5.28
-6	9.07	10.51	9.07
-4.86	9.79	4.9	9.79
-12.61	8.59	8.63	8.59
-15.35	6.12	9.79	6.12
4.45	9.86	7.65	9.86
7.8	5.61	10.13	5.61
5.94	-3.71	4.13	-3.71
8.07	9.35	-8.22	9.35
-16.13	11.01	-8.65	11.01
5.46	-12.5	7.96	-12.5
4.51	-15.73	8.76	-15.73
9.8	-21.85	-7.11	-21.85
-0.64	-13.98	-11.42	-13.98
7.07	-12.4	-8.83	-12.4
8.35	-16.16	-7.78	-16.16
-19.5	-10.56	-10.24	-10.56
-8.81	-0.02	-10.46	-0.02
-14.7	-13.69	2.34	-13.69
-5.35	3.1	-16.21	3.1
-13.81	-4.39	-16.59	-4.39
10.36	-5.52	-2.05	-5.52
6.69	-8.82	-4.68	-8.82
-14.73	-10.46	-11.69	-10.46
-15.52	-11.66	8.4	-11.66
8.27	-11.13	-6.17	-11.13
2.36	5.75	9.06	5.75
7.7	7.98	6.82	7.98
10.67	-14.8	8.5	-14.8
-12.66	-11.88	7.77	-11.88
-19.44	11.08	7.04
2.37	5.8	0.84
5.93	10.49	7.1
-13.04	9.12	7.81
-11.91	9.15	-18.21
-13.61	10.03	-11.8
-2.31	9.25	-21.11
6.6	8.39	-13.19
5.9	-4.89	5.09
10.03	-1.5	7.88
10.75	-6.72	10.53
9.46	-12.94	-7.6
8.57	-11.05	-7.08
7.31	7.16	7.41
7.2	9.89	7.35
7.97	7.96	-13.49
8.4	7.07	-7.41
7.82	7.33	-7.78
10.88	9.1	-8.4
9.45	9.45	9.04
6.84	6.84	6.05
1.38	-13.84	11.45
7.62	-12	9.14
9.48	7.3	8.2
10.03	7.84	7.93
8.38	6.43	-4.57
7.66	10.08	-14.78
7.65	-18.17	7.67
-9.31	-4.86	3.19
-3.84	7.03	8.76
-13.83	1.23	10.19
-7.61	0.13	-14.6
-8.81	0.8	-5.52
-6.69	-15.4	9.06
-7.72	-18.31	9.68
-7.08	-6.65	7.91
-21.12	-11.57	8.61
-1.5	-17.77	7.64
-13.93	-21.85	5.27
-18.62	0.67	5.54
-11.07	-0.4	7.46
-5.25	-9.27	8.65
-7.02	-5	7.64
-6.92	-8.9	8.34
-13.7	-3.69	7.84
-12.2	-4.89	11.78
-10.15	-5.68	8.38
10.77	-10.92	-17.1
11.37	-5.4	-13.81
7.29	-6.62	-11.74
-17.06	-5.3	-8.99
-11.74	-10	5.99
-13.84	-6.41	6.97
-12	-8.17	10.08
8.05	-14.99	8.95
-12.94	8.7	10.67
-4.04	-2	0.68
-16.16	-0.81	8.94
-11.02	8.73	9.65
-10.92	-4.08	-14.95
-17.08	7	-18.32
-16.1	10.65	-3.27
0.58	9.65	-11.02
0.67	-16.9	-9.31
-12.2	-4.86	-13.69
-15.5	-10.55	-3.27
-13.7	-9.99	-10.52
-3.93	-5.96	-10.79
-7.66	-18.99	-10.79
8.88	-3.56	-10.31
8.72	-18.81	-1.04
-14.16	-14.26	-10.5
-6.9	-10	-18.21
-8.38	11.08	9.65
-7.83	3.71	4.86
3.44	5.79	9.09
5.85	10.1	6.03
7.36	7.2	-10.57
7.7	2.99	-14.97
0.77	8.91	10.13
-22.74	7.46	9.72
2.33	8.56	8.39
5.46	10.77	7.61
1.51	9.46	-8.74
8.76	5.29	-12.74
1.16	7.77	-18.51
9.01	-5.84	-24.69
8.33	-18.3	-20.54
2.93	-8.58	7.29
5.59	-16.16	10.65
5.37	-15.08	-17.81
4.45	-6	-11.48
8.59	8.05	7.15
0.67	8.53	5.73
-9.02	7.33	-12.82
-14.28	3.53	-5.86
-18.81	-5.02	7.54
-15.97	-7.83	8.14
-10.31	11.45	-10.31
-10	9.9	-0.31
-17.44	8.88	-3.48
-22.07	8.14	-18.22
-1.81	10.13	-12.97
-21.47	8.19	-18.07
-8.69	8.94	-12
-4.07	9.06	-1.71
-18.65	10.67	-14.7
-10.75	-8.38	-11.8
-11.8	-17.43	-15.82
7.3	-5.02	-6.75
7.84	-14.73	-12.06
3.3	7.85	-8.88
-11.68	1.99	9.65
6.38	9.79	5.07
7.33	9.06	-16.34
8.95	7.88	0.9
10.07	9.25	-11.8
6.43	-11.31	4.8
7.82	-15.32	-0.9
6.62	-12.25	5.46
8.93	-4.02	8.56
-18.49	8.3	4.81
-5.93	9.72	8.6
-10.55	7.29	-6.11
-2.77	4.45	-3.93
-11.74	6.29	-17.64
8.49	6.87	-11.93
-13.98	-6.64	8.91
-5.21	-6.99	6.69
-0.01	-6.27	-18.31
-14.7	-5.66	-13.69
-7.03	4.78	-8.22
-2.22	9.72	-14.65
-12.23	-8.82	4.2
-12.66	-3.51	7.44
-11.69	11.81	-19.06
-12.06	5.18	-11.77
9.79	-0.4	-20.72
8.2	-25.19	-12.72
10.11	8.1	-3.16
8.2	8.17	-18.81
9.6	-2.68	7.63
11.78	-15.05	0.79
8.95	-15.8	8.68
7.03	-11.45	2.3
-20.19	-16.89	-4.04
-3.27	-8.88	-14.87
-0.19	-11.83	10.75
-9.71	-10.6	4.83
-12.82	-15.56	7.7
-18.09	1.28	1.79
-16.53	-12.64	-8.75
-0.76	-0.38	-3.81
5.5	-15.15	-19.24
10.07	-14.26	-2.34
-6.65	-5	-6.51
-10.55	-0.87	-5.21
-16.49	-3.56	10.22
-13.67	7.12	10.24
-11.48	8.17	-16.59
-12.88	8.14	-14.01
-5.68	8.34	8.59
-8.88	-8.46	5.85
-6.89	-11.27	-10.09
-9.31	8.59	-13.26
-7.71	4.41	-10.5
10.47	10.52	-1.59
10.1	8.27	-16.64
7.54	-10	-11.45
8.7	-12.5	-5.31
9.78	-7.76	-5.73
3.35	-16.89	-21.44
1.3	4.45	10.47
8.56	7.44	8.73
9.88	-7.03	11
8.68	-7.03	9.27
8.28	10.45	-13.15
7.55	7.16	-11.8
7.1	-13.07	-13.36
5.56	-5.52	-13.93
7.09	9.78	10.22
5.38	10.9	8.94
10.75	8.76	10.47
-10.92	7.33	-0.75
6.79	8.62	-16.53
9.48	6.36	-17.01
9.04	-7.22	7.68
8.1	-14.26	9.22
7.66	-7.83	4.69
-19.5	-13.69	6.51
-12.12	-4.14	8.14
6.56	-4.68	6.6
7.41	7.33	9.22
3.54	4.2	9.4
7.39	-8.15	-17.49
-3.79	-5.68	-8.66
-17.75	-16.13	-3.83
8.06	-7.55	-3.81
0.56	-11.89	-10.18
8.76	-5.08	-12.78
10.47	-7.78	9.04
5.42	7.39	6.52
10.9	-0.99	7.47
7.58	-8.76	9.72
8.04	-7.64	10.57
3.5	-13.84	7.7
9.46	-13.28	10.29
8.72	-14.97	4.45
8.99	8.56	-5.77
-14.42	8.14	-14.37
-8.15	9.33	7.79
-15.29	-16.49	7.97
-18.15	-7.64	-14.65
7.21	-11.27	-12.87
7.07	-9.26	5.94
8.98	9.72	5.99
10.1	10.06	10.44
9.6	9.05	6.64
-11.48	10.22	9.22
-14.65	8.76	3.48
5.96	8.4	-21.56
7.4	-16.26	-1.5
10.57	0.1	-7.96
8.68	-10	-15.15
8.38	-12.11	10.29
-11.69	-7.78	9.55
-12.06	-11.74	10.38
-9.72	10.57	5.02
-4.04	8.68	9.31
-12.65	-11.3	9.43
-17.79	-14.7	8.28
-9.31	-13.6	3.1
-2.05	-13.03	5.56
1.1	9.37	-5.4
10.13	6.92	-17.01
7.51	8.94	-21.05
11.78	8.55	-12.94
10.65	7.82	8.68
9.46	1.07	4.94
4.92	6.12	-0.81
-20.35	8.68	-18.22
10.06	-20	5.54
9.27	-14.51	9.6
10.22	-10.36	5.54
8.23	-14.55	9.22
-13.95	10.22	3.81
-6.9	5.73	5.59
4.46	-8.17	7.36
-18.32	-8.83	6.91
-9.26	-5.77	-2.05
-10.06	-13.02	-5.78
-8.4	10.86	7.29
-14.77	8.24	3.1
1.1	-8.08	9.45
5.94	-11.02	8.27
8.59	1.97	-11.88
6.66	2.32	-2.95
5.57	-12.59	9.1
3.55	-3.56	7.99
6.66	-9.08	-10.56
9.49	-16.29	-10.92
9.57	-14.65	-13.92
-13.54	-8.83	-14.15
-7.31	-6.51	10.08
-15.05	-22.74	9.73
-18.07	-3.78	-13.26
-10.09	0.9	-14.1
-13.52	9.11	10.24
-12.87	6.17	10.47
6.12	4.81	10.47
8.59	-11.68	2.37
9.46	-6.65	5.88
4.6	0.94	9.45
-18.32	-5.2	10.57
1.57	1.07	5.39
3.62	8.66	10.77
7.36	8.91	5
4.48	5.24	-10.06
7	5.74	-2.07
6.43	10.65	-12.02
10.08	5.11	-11.77
7.54	-2.57	-9.46
7.45	-12.79	-6.71
-17.07	-11.37	9.94
-13.52	-7.51	9.89
10.13	-17.96	8.14
8.88	-16.47	8.83
-3.62	-5.04	-16.6
-2.95	-0.4	-12.2
-10.24	-11.31	10.03
-14.92	-5.43	7.53
-10.55	-13.26	9.48
-18.11	-12.74	9
-20	10.77	9.01
-6.18	-0.16	10.57
-6.62	-11.02	-12.76
-7.4	4.49	-7.4
-18.17	-11.68	-0.92
-4.86	-5.21	7.88
-14.42	-13.07	4.45
-10.06	-20.41	9.1
-15.13	-10.75	9.11
3.61	-7.78	7.69
6.93	8.68	1.82
11.08	9.66	9.35
7.03	-17.07	2.57
7.81	-22.36	5.11
5.07	-4.11	7.57
8.73	-12.47	9.25
10.13	6.66	1.07
5.41	9.8	-12.62
6.62	-13.67	-8.34
3	-15.37	-10
0.62	10.53	10.17
7.52	10.22	6.29
6.29	7.36	-10.3
5.55	6.38	-5.52
7.33	-9.02	10.03
5.42	-13.46	4.52
5.85	-10.57	-6.18
7.82	-5.52	-10.62
9.54	-16.55	10.67
5.9	-12.73	10.44
-21.11	2.34	-8.93
-13.81	-15.05	-5.11
6.84	-14.74	-14.7
9.04	-12.74	-6.51
10.06	-11.8	3.44
7.97	-10.56	-21.44
-10.3	9.06	4.87
8.59	4.86	1.07
0.67	-8.83	-6.11
10.13	-11.74	-7.65
7.05	8.07	-14.27
-13.14	10.57	-3.72
0.13	8.68	7.13
0.8	8.59	7.88
-9.95	-6.69	-8.81
-11.59	-13.71	-6.51
-11.36	7.23	-10.7
-4.96	7.3	-12.12
-8.99	-7.2	-7.78
-11.88	-12.25	-4.86
-12.71	6.19	8.88
-10.01	7.79	2.83
-10.88	9.3	4.13
-11.42	6.45	7.61
-14.6	-15.97	5.73
-12.76	-11.97	5.42
-15.58	8.68	2.83
-21.56	6.22	-4.02
9.6	-6.09	-10.57
7.41	-14.29	8.91
4.41	9.4	8.56
8.02	9.1	4.49
-3.27	-8.4	-13.19
-13.35	-16.64	4.51
7.23	8.62	10.47
-10.06	5.95	-23.05
-8.88	7.3	-16.9
10.16	8.72	8.73
9.26	7.48	6.54
9.22	7.79	11.78
9.82	9.81	6.43
7.87	6.12	-18.51
10.1	0.58	-7.17
-17.31	-4.86	8.56
-11.58	-11.41	11.08
-16.23	9.46	-8.81
-19.5	9.22	-20.55
8.99	8.76	-18.88
8.18	10.47	-18.21
-14.7	-4.86	-12.82
-7.56	-4.77	-12.59
-8.82	8.49	-6.54
-16.59	-5.75	-18.08
-14.6	9.11	9.22
-5.02	5.25	7.13
-12.4	7.65	-21.56
7.82	9.72	-1.5
10.67	-9.54	8.73
6.63	-10.31	2.11
-9.99	7.96	9.21
-17.9	8.34	8.54
-9.56	9.66	-0.87
-20.55	8.95	-13.07
-8.65	9.48	-10.36
-9.63	9.04	-14.55
-8.4	10.47	8.23
10.28	8.33	1.81
10.47	6.05	2.6
-3.29	8.68	8.38
-16.75	6.12	-5.77
10.29	5.37	-14.37
10.08	-6.18	-6.06
10.13	-3.09	-9.15
10.22	-8.4
-13.07	-3.08
-18.38	-18.07
-18.26	-14.97
-15.73	10.74
-5.02	8.3
-18.37	-10.57
-14.01	-13.28
-18.32	9.21
-7.78	8.69
-1.13	8.85
-20.55	6.86
-9.99	8.49
-6.47	7.39
8.59	10.08
8.73	0.67
-0.68	7.66
11	8.91
9.88	-8.4
2.83	-5.84
5.5	-11.79
8.88	-6.16
7.7	7.62
9.27	2.85
8.62	3.84
10.47	6.82
10.65	6.6
7.65	8.68
9.37	10.22
10.49	10.45
-18.31	9.43
-15.17	5.88
-5.18	10.74
-11.88	8.63
-6.86	8.24
1.07	9.1
-12.44	9.81
-6	11.11
-15.4	5.56
-18.31	6.06
-6.65	8.54
-11.57	8.83
-12.72	10.47
-9.82	11.01
-8.41	3.93
-5.36	7.16
-8.38	5.24
-15.05	8.59
-17	3.77
-14.87	9.3
-8.5	2.68
-20.62	-0.37
-11.58	7.2
-8.58	-11.88
-8.88	-11.51
0.67	-11.75
-0.4	-11.14
-6.18	9.65
-26.27	10.03
-9.27	4.88
-5	8.73
5.34	11.11
-18.3	-3.63
-10.24	-16.16
-6.54	-9.54
-8.4	-16.49
-17.9	-21.85
-8.17	-16.29
-10.56	-10.1
-14.7	-10
-8.88	-12.2
-16.6	9.6
-15.33	7.44
-6.07	-8.59
-11.77	-12.61
-13.35	10.53
8.05	-1.02
-4.68	10.57
-12.44	9.5
7.93	7.64
10.06	5.29
9.22	-12.66
7.7	-15.32
8.02	8.83
7.41	5.54
8.94	7.64
7.72	8.31
7.64	11.08
8.68	7
10.29	2.28
7.23	10.67
4.44	9.88
8.46	-5
11.37	-8.49
3.33	8.14
7.61	9.06
7.72	6.29
8.55	9.08
9.8	9.44
7.36	10.19
8.99	9.11
-15.49	5.04
-14.87	9.99
9.09	11.78
2.56	3.53
10.03	7.52
8.68	10.06
8.27	8.62
1.95	-5.43
7.75	-13.19
7.83	7.41
6.93	9.8
-13.26	9.21
-13.67	10.03
8.92	-0.01
-14.26	-24.04
-10	-12.78
1.07	-7.78
-14.65	7.93
4.14	7.96
-8.46	0.55
-25.19	1.81
-17.01	-6.06
7.41	-16.05
5.13	-16.05
4.59	-15.11
-2.38	-8.4
6.12	-4.15
4.87	-11.64
10.29	-12.82
9.55	7.88
-18.15	4.94
7.81	8.68
9.21	2.39
2.78	-11.41
10.1	-3.49
2.05	-11.96
10.19	-11.74
10.75	-13.69
5.61	-11.29
-13.81	-11.83
8.94	-8.69
5.28	8.68
3.32	-3.68
-9.31	-5.92
-17.01	-10.91
-15.59	8.07
-11.43	4.06
5.8	-9.99
8.68	-9.26
7.7	9.88
9.37	9.65
-7.24	-2.77
-11.83	-10.56
-3.27	8.24
-4.86	4.59
-16.16	-11.84
9.6	3.07
8.76	-7.48
8.76	-1.77
9.88	8.78
10.19	8.57
7.66	-13.6
-19.81	-10.36
10.47	9.65
-11.69	4.45
9.89	8.68
9.85	10.45
8.88	6.25
10.22	5.52
-11.51	-11.83
-16.59	-16.49
-8.41	-2.91
-10.55	-12.59
-10.14	-16.21
-16.15	9.07
-15.15	4.82
10.75	7.29
9.35	8.17
10.57	-16.49
8.78	-0.26
-15.15	8.56
-6.51	8.28
-8.9	-3.24
-3.69	-16.49
-4.89	7.7
-7.46	9.22
-5.68	10.65
7.82	3.53
5.99	-13.36
3.96	-10.81
9.89	7.09
-4.86	8.66
-11.24	5.23
9.07	-6.95
7.61	-11.22
-7.48	-2.95
-14.77	-11.13
-20.91	-0.4
5.39	10.4
7.23	10.45
-0.15	7.2
8.7	9.81
0.49	-9.45
1.51	-6.94
-6.16	-10.5
8.56	-8.5
-8.4	-5.11
8.91	-2.48
8.55	8.68
5.24	8.83
7.63	-16.29
7.39	-18.22
8.76	-5.86
9.06	-10.56
2.57	-18.64
10.15	-4.96
10.67	-12.81
8.56	-10.56
4.22	-16.59
9.01	-12.79
8.27	10.47
9.04	9.48
9.65	8.8
-10.92	9.72
-5.4	8.28
-0.02	4.72
9.85	9.45
-7.74	7.15
9.11	9.22
-11.48	-6.09
-10.22	-8.81
-21.85	3.1
-24.04	-0.01
-3.56	-12.66
-20.35	10.28
-4.39	9.1
-16.59	7.35
-11.48	6.51
-16.29	7.63
-10.57	9.63
-15.56	10.13
-15.15	7.12
7.82	-20.72
1.01	-4.63
7.79	-1.46
5.89	-14.04
-13.28	-11.12
-11.51	-9.26
-9.5	9.43
-13.56	9.26
-13.74	-14.99
-13.72	-7.56
-13.93	-8.4
-13.71	-4.63
-2.22	6.99
3.22	8.72
7.77	-19.5
-6.86	-7.4
-10.56	8.54
5.46	8.38
7.39	-9.27
11.01	-10.09
3.32	-11.09
-18.3	-13.35
8.02	3.1
10.22	-2.07
-6.18	6.99
-11.02	9.11
0.77	10.24
9.26	3.75
6.66	-13.82
9.14	-10
6.95	10.74
9.89	4.86
7.2	8.77
2.68	3.56
-2.95	7.34
-4.39	7.2
9.25	7.3
-15.53	10.07
6.71	6.93
-2.95	7.96
-16.69	10.1
-17.9	10.24
-7.17	-2.77
-1.77	4.46
-7.65	-8.9
-14.65	-7.48
-9.26	10.06
6.56	4.82
6.43	-13.07
6.17	-18.3
-18.15	-13.03
-11.75	-11.97
-7.55	7.04
-13.93	4.57
-15.82	9.45
-5.11	10.51
-20.19	4.9
-13.28	8.63
-3.27	9.79
10.47	7.65
7.16	10.13
7.14	4.13
7.72	-8.22
5.42	-8.65
9.6	7.96
7.69	8.76
9.89	-7.11
-11.31	-11.42
-11.51	-8.83
-12.87	-7.78
-2.52	-10.24
-11.36	-10.46
-14.97	2.34
11	-16.21
-14.97	-16.59
10.47	-2.05
9.43	-4.68
8.34	-11.69
7.56	8.4
2.84	-6.17
7.41	9.06
-21.34	6.82
-7.35	8.5
-6.18	7.77
-8.4	7.04
1.07	0.84
-10.56	7.1
6.6	7.81
9.45	-18.21
7.47	-11.8
2.33	-21.11
-7.43	-13.19
-12.21	5.09
10.57	7.88
10.13	10.53
2.93	-7.6
9.8	-7.08
5.55	7.41
-18.06	7.35
-18.3	-13.49
7.1	-7.41
9.26	-7.78
4.15	-8.4
8.94	9.04
7	6.05
10.52	11.45
4.44	9.14
6.72	8.2
-7.4	7.93
-8.4	-4.57
10.03	-14.78
7.29	7.67
7.76	3.19
-3.18	8.76
-5.4	10.19
8.68	-14.6
9.49	-5.52
9.81	9.06
6.46	9.68
8.56	7.91
-6.62	8.61
-5.85	7.64
-6.17	5.27
-5.85	5.54
-5.85	7.46
-11.19	8.65
-3.01	7.64
-3.27	8.34
-6.62	7.84
-5.3	11.78
-10	8.38
-6.41	-17.1
-23.17	-13.81
10.93	-11.74
-13.39	-8.99
-7.4	5.99
-13.46	6.97
-3.04	10.08
9.84	8.95
9.22	10.67
7.63	0.68
-12.34	8.94
8.68	9.65
-9.27	-14.95
-8.17	-18.32
-14.99	-3.27
8.7	-11.02
-2	-9.31
7.52	-13.69
4.8	-3.27
-7.17	-10.52
8.68	-10.79
-6.94	-10.79
-7.11	-10.31
-15.28	-1.04
-0.81	-10.5
8.73	-18.21
9.79	9.65
4.85	4.86
6.14	9.09
2.55	6.03
8.76	-10.57
5.85	-14.97
8.95	10.13
8.23	9.72
5.69	8.39
2.29	7.61
8.54	-8.74
0.28	-12.74
11	-18.51
10.57	-24.69
8.68	-20.54
3.58	7.29
5.56	10.65
9.44	-17.81
-5.52	-11.48
-5.21	7.15
-14.9	5.73
-12.61	-12.82
-12.85	-5.86
-12.81	7.54
-21.11	8.14
-12.06	-10.31
-16.38	-0.31
-19.44	-3.48
-3.27	-18.22
-22.74	-12.97
9.27	-18.07
9.88	-12
6.65	-1.71
7.36	-14.7
8.34	-11.8
7.51	-15.82
8.4	-6.75
6.38	-12.06
8.55	-8.88
8.95	9.65
9.65	5.07
10.13	-16.34
9.46	0.9
4.44	-11.8
-19.77	4.8
-18.11	-0.9
-0.3	5.46
-2.95	8.56
-8.83	4.81
-4.62	8.6
9.22	-6.11
5.94	-3.93
-18.3	-17.64
-5.36	-11.93
-17.02	8.91
-5.68	6.69
-11.13	-18.31
7.13	-13.69
5.45	-8.22
7.4	-14.65
9.22	4.2
9.43	7.44
9.2	-19.06
-15.37	-11.77
-19.06	-20.72
-21.44	-12.72
3.61	-3.16
-17.88	-18.81
-7.4	7.63
-13.93	0.79
-10.46	8.68
10.65	2.3
6.02	-4.04
7.39	-14.87
2.55	10.75
11.81	4.83
6.22	7.7
7.2	1.79
9.35	-8.75
7.94	-3.81
9.3	-19.24
-1.05	-2.34
-2.52	-6.51
-8.82	-5.21
1.98	10.22
8.72	10.24
7.82	-16.59
10.07	-14.01
9.6	8.59
10.88	5.85
5.75	-10.09
-4.39	-13.26
-8.9	-10.5
-18.5	-1.59
-11.75	-16.64
-7.78	-11.45
-11.02	-5.31
-6.65	-5.73
-3.04	-21.44
-9.27	10.47
10.67	8.73
8.6	11
6.3	9.27
8.38	-13.15
7.27	-11.8
8.6	-13.36
9.27	-13.93
8.68	10.22
9.6	8.94
5.55	10.47
-18.22	-0.75
11	-16.53
7.42	-17.01
8.84	7.68
9.06	9.22
8.91	4.69
7.81	6.51
-6.41	8.14
1.64	6.6
-4.46	9.22
-11.69	9.4
-9.91	-17.49
-6.9	-8.66
-8.81	-3.83
-12.87	-3.81
-20.78	-10.18
-15.15	-12.78
-22.21	9.04
-11.69	6.52
-8.41	7.47
-5.35	9.72
-12.87	10.57
-13.81	7.7
-8.37	10.29
-10.57	4.45
-18.31	-5.77
7.93	-14.37
8.94	7.79
11.01	7.97
9.22	-14.65
7.69	-12.87
4.51	5.94
7.66	5.99
3.65	10.44
10.08	6.64
-14.26	9.22
8.46	3.48
10.06	-21.56
-24.04	-1.5
6.68	-7.96
9.25	-15.15
8.57	10.29
-3.56	9.55
-8.76	10.38
7.2	5.02
10.74	9.31
10.65	9.43
8.34	8.28
11.01	3.1
9.27	5.56
4.19	-5.4
-10.4	-17.01
-14.6	-21.05
-24.04	-12.94
-0.26	8.68
-3.29	4.94
9.79	-0.81
9.68	-18.22
-11.77	5.54
-10.27	9.6
-19.46	5.54
8.01	9.22
9.04	3.81
4.41	5.59
0.45	7.36
7.45	6.91
9.2	-2.05
7	-5.78
-8.81	7.29
-5.68	3.1
-9.77	9.45
-15.73	8.27
-7.02	-11.88
6.84	-2.95
-8.38	9.1
-14.69	7.99
9.48	-10.56
8.88	-10.92
8.88	-13.92
7.64	-14.15
4.61	10.08
5.85	9.73
10.1	-13.26
10.1	-14.1
2.77	10.24
8.59	10.47
5.02	10.47
5.56	2.37
6.43	5.88
4.61	9.45
4.9	10.57
-11.66	5.39
-19.69	10.77
-7.61	5
-8.49	-10.06
4.74	-2.07
-8.84	-12.02
-11.77	-11.77
-10.56	-9.46
2.34	-6.71
4.96	9.94
-8.69	9.89
-4.89	8.14
-15.59	8.83
-15.36	-16.6
-10.33	-12.2
-12.79	10.03
9.89	7.53
7.47	9.48
6.69	9
6.8	9.01
7.7	10.57
10.1	-12.76
7.23	-7.4
9.21	-0.92
8.31	7.88
6.81	4.45
10.1	9.1
5.28	9.11
5.61	7.69
9.43	1.82
6.39	9.35
11.37	2.57
7.36	5.11
6.82	7.57
9.72	9.25
10.15	1.07
8.68	-12.62
9.1	-8.34
5.71	-10
4.78	10.17
7.4	6.29
9.48	-10.3
4.96	-5.52
9.6	10.03
7.15	4.52
10.75	-6.18
7.23	-10.62
5.46	10.67
9.85	10.44
-16.64	-8.93
10.36	-5.11
7.4	-14.7
9.16	-6.51
5.07	3.44
-23.61	-21.44
-5.52	4.87
-7.02	1.07
-11.69	-6.11
-15.05	-7.65
9.22	-14.27
10.67	-3.72
9.14	7.13
4.85	7.88
6.36	-8.81
7.7	-6.51
7.64	-10.7
-11.77	-12.12
-4.89	-7.78
-10.5	-4.86
-12.2	8.88
-15.01	2.83
-16.96	4.13
-23.05	7.61
-11.77	5.73
-11.31	5.42
-8.37	2.83
-13.67	-4.02
-17.7	-10.57
-10.24	8.91
-7.08	8.56
-6.9	4.49
-18.08	-13.19
-10.06	4.51
-15.39	10.47
-7.87	-23.05
-5.25	-16.9
5.23	8.73
-6.09	6.54
-10.46	11.78
-1.46	6.43
-8.17	-18.51
-10.92	-7.17
-10.89	8.56
-15.01	11.08
-5.93	-8.81
-18.21	-20.55
1.54	-18.88
-6.73	-18.21
-15.12	-12.82
-10.32	-12.59
-20.35	-6.54
-14.83	-18.08
-15.15	9.22
-14.45	7.13
-15.59	-21.56
-16.21	-1.5
2.1	8.73
-10.56	2.11
-17.92	9.21
-18.22	8.54
8.73	-0.87
-10.56	-13.07
7.97	-10.36
8.68	-14.55
9.11	8.23
9.3	1.81
3.7	2.6
10.47	8.38
6.38	-5.77
-11.02	-14.37
-17.65	-6.06
-21.43	-9.15
-5.52
-14.87
-12.02
-8.92
-14.12
-10.27
-9.26
-8.39
1.07
-20.19
-12.25
-15.11
-12.12
-18.3
-5.11
-12.47
-12.59
-16.57
-16.94
-9.27
-9.03
-3.56
5.53
-15.05
-6.74
-19.03
-10.4
-1.69
-6.41
-4.26
-5.4
-25.19
-14.87
-22.74
-20.78
-17.33
10.13
10.13
11.08
6.89
10.47
8.39
4.18
-1.77
-9.8
8.38
8.62
11.78
6.72
9.22
-2.36
9.22
9.82
8.49
9.79
9.89
4.29
9.27
8.83
10.65
4.19
4.07
4.19
-15.07
-21.4
-7.4
-18.65
-12.82
8.62
8.88
-12.76
-6.75
7.16
7.8
8.15
9.73
-16.16
-10.92
-0.38
-11.48
-15.15
-8.82
-3.27
-15.59
-2.9
-3.72
-11.75
-11.77
11.81
-9.54
9.6
-14.99
-6
-3.46
-9.55
-10.75
10.57
7.84
8.88
-3.46
-10.14
8.76
10.67
8.31
7.3
8.38
9.14
5.99
4.58
6.63
7.3
-14.95
-16.9
-4.86
-6.9
-0.87
-2.95
4.68
5.58
-8.31
-5.92
-8.31
-5.92
-8.76
-10.7
6.99
-2.05
-19.06
-10.55
-9.99
-8.9
-20.54
-1.71
9.1
9.72
9.1
7.94
-16.32
-7.83
9.65
10.03
8.68
10.75
5.96
8.91
7.22
6.12
7.56
9.82
0.78
5.06
5.13
6.99
4.46
9.04
7.88
9.6
[truncated: 30,668 more rows]

## Sheet: RI_5ss
ctrl	ACs	ATCs	AOCs	tDASGs	oDASGs
-9.62	8.88	2.56	8.88	10.22	-10.02
-18.29	-13.36	10.03	-13.36	9.81	-1.71
3.19	-15.27	-15.27	-15.27	10.03	-1.71
5.67	-31.59	-31.59	-31.59	2.56	-11.37
-25.8	-17.93	5.56	-17.93	-22.19	-11.37
-9.78	-36.31	10.29	-36.31	5.28	-8.16
-5.83	-36.31	-20.84	-36.31
7.97	-10.02	5.37	-10.02
8.88	-1.71	6.91	-1.71
-7.29	-11.37	7.08	-11.37
-1.37	-8.16	4.54	-8.16
-2.23	-10.75	-8.83	-10.75
10.03	-13.4	-10.7	-13.4
3.61	-11.83	-8.69	-11.83
-4.04	-15.99	-17.41	-15.99
4.81	8.59	-14.65	8.59
8.14	3.77	7.65	3.77
5.6	8.24	-0.85	8.24
9.33	8.27	-22.63	8.27
-25.62	-12.49	-12.29	-12.49
-19.25	-1.71	8.56	-1.71
-14.74	-15.01	-15.77	-15.01
-8.15	-14.12	7.3	-14.12
7.97	1.07	11	1.07
8.88	4.83	-12.06	4.83
-13.36	-15.23	-7.02	-15.23
-19.22	-31.62	4.36	-31.62
-9.72	-3.88	6.8	-3.88
-4.04	-28.61	9.01	-28.61
-26.96	9.22	8.94	9.22
-11.74	10.65	5.37	10.65
8.14	-12.94	-19.47	-12.94
8.92	0.89	-8.4	0.89
-15.27	-27.58	-11.83	-27.58
-31.59	-18.1	7	-18.1
-3.72	1.28	8.56	1.28
-8.46	-32.13	9.88	-32.13
-22.74	-0.05	2.28	-0.05
-11.35	-33.13	-12.49	-33.13
9.39	2.4	-1.71	2.4
8.88	-22.3	4.71	-22.3
-4.53	-13.45	-43.03	-13.45
-15.59	-17.57	-11.88	-17.57
5.56	-23.75	-12.78	-23.75
10.29	-14.12	1.26	-14.12
2.29	5.1	8.27	5.1
7.97	10.57	8.76	10.57
-1.85	-9.46	9.25	-9.46
8.88	-24.1	6.52	-24.1
-15.39	-18.2	8.14	-18.2
-0.66	-18.3	-13.22	-18.3
-3.29	-18.4	-20.62	-18.4
1.51	-9.14	-11.8	-9.14
-14.97	2.56	-21
-15	10.03	-4.02
-11.54	-15.27	-18.07
-6.94	-31.59	-7.25
4.57	5.56	5.88
9.79	10.29	-33.51
-20.84	-20.84	9.81
5.37	5.37	10.22
8.85	6.91	5.07
5.07	7.08	8.31
6.91	4.54	-18.42
7.08	-8.83	-5.21
-10.31	-10.7	-22.39
-2.95	-8.69	-20.18
10.08	-17.41	-12.13
6.42	-14.65	-26.99
1.32	7.65	8.68
-9.85	-0.85	-22.3
-7.35	-22.63	-6.59
2.34	-12.29	11
10.77	8.56	5.28
9.49	-15.77	-22.19
2.06	7.3	7.2
10.06	11	-10.06
-10.7	-12.06	2.29
-13.1	-7.02	8.04
-6.71	4.36	-10.48
-7.42	6.8	-10.48
-17.93	9.01	-1.87
-36.31	8.94	-18.53
-36.31	5.37	1.71
-4.04	-19.47	-29.45
-12.49	-8.4	6.04
10.47	-11.83	-7.97
-11.93	7
9.11	8.56
11.45	9.88
5.18	2.28
8.28	-12.49
-15.82	-1.71
-8.71	4.71
-2.57	-43.03
-16.59	-11.88
-7.33	-12.78
5.42	1.26
8.05	8.27
4.54	8.76
-8.83	9.25
-10.7	6.52
-8.69	8.14
-26.79	-13.22
-15.29	-20.62
-12.3	-11.8
-16.16	-21
-1.71	-4.02
-11.37	-18.07
-5.81	-7.25
-38.76	5.88
-10	-33.51
1.03	9.81
4.71	10.22
9.65	5.07
-12.76	8.31
-24.4	-18.42
6.62	-5.21
-17.13	-22.39
-15.19	-20.18
-7.2	-12.13
5.22	-26.99
-19.87	8.68
-29.97	-22.3
4.08	-6.59
-30.28	11
-17.41	5.28
-14.65	-22.19
7.65	7.2
-0.85	-10.06
-13.84	2.29
-13.74	8.04
10.07	-10.48
10.1	-10.48
10.65	-1.87
8.4	-18.53
-22.63	1.71
-12.29	-29.45
8.56	6.04
-15.77	-7.97
-14.87
-17.99
-2.4
-12.79
-4.86
-15.08
3.34
-30.8
-10.62
-10.08
8.94
1.76
-8.76
-12.66
8.49
11.11
-7.56
-1.77
-9.63
-23.52
5.19
-0.28
7.29
-17.87
3.24
3.95
-28.91
-8.58
-2.9
-22.06
-13.19
-1.34
9.21
3.54
10.77
2.31
7.22
8.59
-4.43
0.67
8.94
7.44
-4.43
0.67
8.59
-4.43
-9.03
1.07
1.07
-11.51
-10.69
-24.04
-2.95
2.92
-45.06
10.65
-27.05
0.1
-12.65
-8.81
-7.17
-11.1
-15.22
7.77
-7.83
-9.8
8.99
10.65
7.3
11
10.48
-24.46
9.1
-12.83
-12.5
1.64
-10.75
-13.4
-15.58
-11.13
-11.83
-15.99
-11.8
-12.65
6.84
9.37
9.65
10.44
-12.06
-7.02
4.36
6.8
6.68
3.2
10.22
-18.8
9.01
8.94
-14.26
-12.65
7.76
-13.72
6.17
-28.94
-0.8
-12.43
5.52
10.75
5.37
-19.47
0.8
-40.86
6.6
-14.84
-1.25
8.73
-13.35
-34.28
9.82
-36.56
5.04
9.06
-4.04
0.87
-8.4
-11.83
-1.81
-15.41
0.55
7.51
9.21
9.82
-4.45
-11.58
-10.55
-10.56
8.59
3.77
6.38
9.06
5.73
9.09
9.4
5.77
6.39
0.46
-11.68
4.59
10.16
-13.71
-8.39
6.39
-19.16
7
8.56
9.88
2.28
8.24
8.27
-10.55
-11.74
-31.08
-19.96
4.41
-18.13
3.08
9.13
-6.51
-22.66
-12.49
-1.71
9.1
9.1
4.71
-43.03
-34.38
-18.27
-8.88
-9.54
-30.77
-12.44
-16.15
-7.46
6.84
9.8
-11.88
-12.78
-8.65
-18.01
-11.31
-18.15
3.61
-14.96
-8.17
-16.49
11.01
10.03
-13.69
-9.31
-11.02
-10.61
-13.71
-13.83
6.32
-16.8
0.48
-40.87
-7.89
5.55
-3.69
-20.41
-18.32
-13.19
0.1
-7.83
4.3
2.09
9.79
8.83
9.81
-14.76
-6.51
-13.65
10.03
-7.23
1.09
10.49
-14.9
-12.61
-15.01
-14.12
-12.23
-14.42
7.83
-44.29
7.35
9.39
9.07
-11.02
-5.86
-10.55
-21.44
9.85
7.51
-17.43
-7.4
-22.18
-12.76
1.26
8.27
8.88
8.14
8.76
9.25
7.66
9.8
5.69
-31.13
7.05
6.04
6.9
2.73
-13.4
-12.94
2.31
7.66
2.81
-2.19
7.66
-13.97
-16.52
-18.74
-6.89
-29.42
-10.24
7.15
8.24
11.08
10.03
1.07
4.83
-1.13
-5.43
8.14
9.81
8.41
7.77
-9.43
-1.89
6.52
8.14
1.27
6.04
-5.08
-11.8
-10.23
-17.82
-18.82
-10.09
10.12
9.6
7.43
6.29
6.73
-13.22
-20.62
-2.99
-16.93
-21.32
-13.69
9.45
9.8
-11.8
-21
-15.23
-31.62
-26.12
-14.28
5.42
9.25
-40.01
-14.04
-4.02
-18.07
-7.25
5.88
-33.51
8.76
5.02
-20.3
-12.56
5.07
8.31
-10.79
-10
1.69
-25.27
7.26
9.25
-17.56
-14.73
7.65
4.5
3.27
8.4
-22.76
-19.24
-17.96
-18.42
-5.21
-18.42
-5.21
5.11
5.01
9.6
1.24
-33.01
-17.06
6.29
-13.15
-16.64
-3.69
-26.68
-14.52
-3.88
-28.61
-15.18
-6.41
-35.16
-10.55
-9.07
-11.54
-22.57
-14.7
-9.99
-22.39
-20.18
8.73
10.13
9.22
10.65
-38.8
-12.64
-10.56
-19.77
7.79
-15.7
-12.94
0.89
-0.92
-36.27
-12.13
-12.13
-12.13
-12.13
-12.13
-26.99
-27.58
-18.1
-0.05
-33.13
-5.35
-4.89
-0.37
-17.28
-6.18
-9.15
-1.55
-4.9
8.68
2.4
-22.3
-6.59
11
-13.45
-17.57
7.94
8.62
4.42
4.42
-4.97
-11.75
-8.4
9.43
11.45
9.94
10.9
-15.55
-13.95
9.35
2.37
2.7
9.26
8.62
8.14
-17.8
-6.52
-5.02
7.44
6.84
8.38
9.08
6.68
-12.82
-12.59
-14.05
-16.26
-23.75
-14.12
7.64
-15.91
-29.16
-21.3
-18.29
-18.88
-9.19
-14.57
4.22
7.26
9.21
9.35
-8.69
7.2
-10.06
-23.94
-6.94
-17.55
-8.58
-9.4
-15.37
-13.29
7.98
-17.8
-5.68
-22.94
5.1
10.57
-8.23
-8
8.72
10.67
9.6
7
-21.33
7.4
-10.56
-12.06
1.13
5.59
-14.77
8.83
9.1
8.68
2.29
8.04
-1.03
5.49
10.4
-15.45
6.04
-1.59
-17.06
-2.8
-34.49
2.33
-15.2
-14.37
8.54
0.76
9.6
-10.48
-10.48
-9.46
-24.1
-28.35
-1.85
-2.78
-1.85
2.83
-18.2
-15.6
-6.78
-18.3
-18.4
-9.14
8.68
5.06
-16.34
5.45
2.63
-12.96
-9.6
3.27
7.1
0.26
9.6
3.5
-17.39
-1.87
-18.53
3.11
8.38
-10.79
-24.04
6.93
-9.36
-0.44
-29.23
-26.74
-19.37
-11.41
-12.12
-1.77
-12.5
7.22
5.06
7.64
-24.53
-19.56
-14.42
5.06
7.2
1.71
-29.45
6.04
6.04
-7.97
5.67
-29.61
-20.39
-12.32
-14.63
-12.65
-2.36
9.85
-12.18
4.08
-30.46
8.76
9.25
-11.63
5.2
