# Supplementary material for: Comprehensive Transcriptome Analysis Reveals Sex-Specific Alternative Splicing Events in Zebrafish Gonads
Source: Life (Basel). 2022 Sep 16;12(9):1441. doi: 10.3390/life12091441 (PMC9501657; doi:10.3390/life12091441)
Supplement: Supplementary file 1 [file life-12-01441-s001.zip › Table S6.xlsx]

## Sheet: A3
ctrl	ACs	ATCs	AOCs	tDASGs	oDASGs
0.5	0.484848	0.484848	0.56867	0.42293	0.454545
0.75	0.4	0.4	0.407407		0.5
0.75	0.540541	0.540541	0.5		0.625
0.75	0.230769	0.230769	0.5		0.353675
0.56867	0.428571	0.428571	0.427536		0.4
0.56383	0.428571	0.428571	0.5		0.409091
0.545455	0.6	0.6	0.428571
0.5	0.9	0.9	0.454545
0.75	0.75	0.75	0.473684
0.5	0.409091	0.409091	0.75
0.75	0.75	0.75	0.5
0.5	0.4	0.4	0.5
0.5	0.75	0.75	0.5
0.5	0.49359	0.49359	0.75
0.5	0.4375	0.4375	0.75
0.422222	0.580645	0.580645	0.340198
0.428571	0.6	0.6	0.375
0.5	0.42293	0.42293	0.538462
0.25	0.571429	0.571429	0.75
0.5	0.538462	0.538462	0.42293
0.25	0.75	0.75	0.25
0.75	0.625	0.625	0.5
0.5	0.75	0.75	0.363636
0.75	0.37931	0.37931	0.625
0.2	0.75	0.75	0.353675
0.5	0.571429	0.571429	0.7
0.622951	0.56338	0.56338	0.441558
0.534247	0.387097	0.387097	0.578947
0.490566	0.394022	0.394022	0.461538
0.468085	0.75	0.75	0.5
0.468085	0.435714	0.435714	0.375
0.75	0.516129	0.516129	0.5
0.5	0.5	0.5	0.491803
0.461538	0.4	0.4	0.5
0.75	0.75	0.75	0.563107
0.454545	0.428571	0.428571	0.285714
0.479167	0.3125	0.3125	0.5
0.75	0.557377	0.557377	0.578947
0.5	0.75	0.75	0.590909
0.75	0.419355	0.419355	0.75
0.75	0.516129	0.516129	0.5
0.75	0.75	0.75	0.75
0.75	0.5	0.5	0.35
0.75	0.354839	0.354839	0.473684
0.25	0.431034	0.431034	0.75
0.75	0.75	0.75	0.558824
0.222222	0.5	0.5	0.571429
0.5	0.5	0.5	0.6
0.75	0.75	0.75	0.489796
0.516129	0.75	0.75	0.75
0.75	0.3	0.3	0.521739
0.384615	0.5	0.5	0.527778
0.5	0.75	0.75	0.75
0.75	0.461538	0.461538	0.75
0.25	0.538462	0.538462	0.75
0.25	0.583333	0.583333	0.529412
0.2	0.483871	0.483871	0.5
0.75	0.460526	0.460526	0.551587
0.5	0.8	0.8	0.75
0.5	0.75	0.75	0.75
0.75	0.454545	0.454545	0.521739
0.4375	0.5	0.5	0.75
0.75	0.5	0.5	0.338784
0.373626	0.75	0.75	0.4
0.5	0.75	0.75	0.25
0.75	0.75	0.75	0.272727
0.75	0.75	0.75	0.304348
0.5	0.75	0.75	0.325257
0.75	0.3	0.3	0.451613
0.75	0.516129	0.516129	0.409091
0.6	0.5	0.5	0.571429
0.75	0.428571	0.428571	0.436147
0.545455	0.5	0.5	0.344828
0.4375	0.75	0.75	1
0.6	0.6	0.6	0.5
0.25	0.56867		0.308756
0.458333	0.407407		0.285714
0.75	0.5		0.5
0.5	0.5		0.352941
0.75	0.427536		0.365385
0.480519	0.5		0.75
0.484848	0.428571		0.431034
0.277778	0.454545		0.540373
0.75	0.473684		0.513889
0.75	0.75		0.510204
0.75	0.5		0.545455
0.75	0.5		0.75
0.75	0.5		0.5
0.75	0.75		0.5625
0.5	0.75		0.461538
0.5	0.340198		0.5
0.4	0.375		0.75
0.4	0.538462		0.678571
0.75	0.75		0.428571
0.403846	0.42293		0.590164
0.418182	0.25		0.454545
0.75	0.5		0.75
0.5	0.363636		0.5
0.75	0.625		0.25
0.5	0.353675		0.75
0.5	0.7		0.311475
0.533333	0.441558		0.347826
0.75	0.578947		0.542857
0.75	0.461538		0.372632
0.435754	0.5		0.56
0.285714	0.375		0.75
0.5	0.5		0.529412
0.567797	0.491803		0.545455
0.5	0.5		0.75
0.5	0.563107		0.45
0.333333	0.285714		0.5
0.431818	0.5		0.5
0.75	0.578947		0.5
0.4	0.590909		0.7
0.7	0.75		0.527273
0.75	0.5		0.75
0.407407	0.75		0.75
0.75	0.35		0.571429
0.75	0.473684
0.5	0.75
0.5	0.558824
0.166667	0.571429
0.349169	0.6
0.615385	0.489796
0.5	0.75
0.323529	0.521739
0.322581	0.527778
0.540541	0.75
0.714286	0.75
0.230769	0.75
0.444444	0.529412
0.5	0.5
0.176471	0.551587
0.25	0.75
0.769231	0.75
0.5	0.521739
0.625	0.75
0.75	0.338784
0.5	0.4
0.5	0.25
0.5	0.272727
0.5	0.304348
0.75	0.325257
0.5	0.451613
0.75	0.409091
0.75	0.571429
0.615385	0.436147
0.6	0.344828
0.25	1
0.75	0.5
0.385965	0.308756
0.25	0.285714
0.75	0.5
0.772727	0.352941
0.75	0.365385
0.427536	0.75
0.75	0.431034
0.75	0.540373
0.359109	0.513889
0.433735	0.510204
0.75	0.545455
0.5	0.75
0.75	0.5
0.5	0.5625
0.357143	0.461538
0.32	0.5
0.45614	0.75
0.545455	0.678571
0.631579	0.428571
0.75	0.590164
0.318367	0.454545
0.5	0.75
0.428571	0.5
0.5	0.25
0.5	0.75
0.4	0.311475
0.75	0.347826
0.473684	0.542857
0.444444	0.372632
0.444444	0.56
0.26186	0.75
0.75	0.529412
0.75	0.545455
0.616766	0.75
0.506329	0.45
0.459459	0.5
0.409091	0.5
0.75	0.5
0.75	0.7
0.5	0.527273
0.285714	0.75
0.692308	0.75
0.545455	0.571429
0.339567
0.6875
0.333333
0.454545
0.75
0.5
0.277778
0.347826
0.666667
0.307692
0.75
0.75
0.75
0.75
0.681818
0.285714
0.6
0.5
0.294118
0.5
0.75
0.492537
0.9
0.333333
0.365385
0.75
0.315789
0.7
0.5
0.75
0.75
0.387097
0.5
0.75
0.421053
0.75
0.75
0.75
0.321429
0.75
0.5
0.75
0.5
0.5
0.75
0.75
0.75
0.5
0.75
0.75
0.666667
0.25
0.75
0.25
0.75
0.538462
0.538462
0.5
0.75
0.5
0.473684
0.75
0.75
0.75
0.75
0.5
0.75
0.5
0.409091
0.5625
0.428571
0.571429
0.75
0.5
0.25
0.666667
0.75
0.571429
0.5
0.653061
0.4375
0.384615
0.5
0.75
0.522936
0.465116
0.5
0.75
0.5
0.5
0.75
0.75
0.5
0.75
0.75
0.5
0.75
0.75
0.542857
0.307692
0.421053
0.5
0.666667
0.455497
0.5
0.569231
0.5
0.538462
0.428571
0.25
0.4
0.516129
0.5
0.75
0.442623
0.75
0.518797
0.75
0.5
0.4
0.413793
0.5
0.526316
0.512658
0.5
0.75
0.5625
0.49359
0.540984
0.442308
0.75
0.48
0.5
0.5
0.266667
0.75
0.296296
0.454545
0.476923
0.4375
0.5
0.5
0.75
0.5
0.526316
0.75
0.75
0.470588
0.75
0.714286
0.615385
0.571429
0.8
0.75
0.5
0.435165
0.75
0.5
0.340198
0.75
0.75
0.75
0.75
0.75
0.75
0.75
0.5
0.5
0.75
0.428571
0.75
0.5
0.451613
0.375
0.5
0.5
0.538462
0.5
0.5
0.580645
0.5
0.75
0.512195
0.75
0.321429
0.5
0.25
0.6
0.3125
0.8
0.571429
0.5
0.423358
0.551724
0.545455
0.25
0.75
0.411765
0.75
0.492537
0.75
0.5
0.411765
0.25
0.75
0.6
0.5
0.75
0.363636
0.5
0.465753
0.5
0.75
0.75
0.461538
0.75
0.75
0.421053
0.505263
0.75
0.428571
0.352941
0.5
0.5
0.380952
0.5
0.857143
0.631579
0.538462
0.75
0.5
0.5
0.666667
0.75
0.5
0.75
0.459016
0.75
0.75
0.454545
0.366667
0.391304
0.75
0.4
0.714286
0.390244
0.551724
0.5
0.5
0.325581
0.48
0.5
0.75
0.75
0.166667
0.75
0.333333
0.5
0.428571
0.5
0.75
0.46875
0.75
0.75
0.402985
0.75
0.625
0.353675
0.272727
0.428571
0.571429
0.5
0.57732
0.75
0.5625
0.5
0.75
0.5
0.451613
0.7
0.5
0.75
0.5
0.409639
0.5
0.441558
0.362722
0.75
0.578947
0.324324
0.384615
0.447059
0.558824
0.75
0.5
0.75
0.535714
0.285714
0.5
0.5
0.75
0.351351
0.571429
0.714286
0.5
0.534884
0.75
0.75
0.25
0.5
0.666667
0.384615
0.5625
0.5
0.461538
0.540541
0.714286
0.75
0.5
0.56
0.36
0.5
0.515625
0.75
0.75
0.75
0.75
0.75
0.75
0.5
0.4375
0.5
0.75
0.75
0.8
0.441176
0.375
0.5
0.5
0.526316
0.411215
0.75
0.5
0.491803
0.75
0.607843
0.75
0.37931
0.5
0.5
0.5
0.5
0.75
0.5
0.538462
0.571429
0.5
0.75
0.5
0.5
0.25
0.5
0.5
0.25
0.75
0.36
0.25
0.5
0.571429
0.563107
0.75
0.75
0.486486
0.75
0.571429
0.5
0.75
0.4875
0.5
0.5
0.25
0.5
0.571429
0.75
0.5
0.75
0.75
0.25
0.5
0.75
0.75
0.6
0.666667
0.571429
0.56338
0.5
0.590909
0.363636
0.75
0.5
0.480769
0.387097
0.382353
0.5
0.25
0.5625
0.25
0.75
0.5
0.5
0.5
0.75
0.75
0.460317
0.75
0.470588
0.75
0.6
0.463768
0.45
0.394022
0.6
0.5
0.25
0.285714
0.648649
0.75
0.75
0.75
0.4
0.5
0.75
0.75
0.5
0.75
0.333333
0.75
0.5
0.333333
0.75
0.5
0.5
0.578125
0.5
0.5
0.5
0.5
0.75
0.578947
0.590909
0.75
0.4
0.5
0.75
0.75
0.75
0.833333
0.75
0.233333
0.447674
0.75
0.75
0.375
0.5
0.479839
0.5625
0.473684
0.25
0.5
0.75
0.5
0.349693
0.75
0.5
0.25
0.75
0.75
0.435714
0.75
0.409091
0.75
0.508772
0.75
0.5
0.75
0.516129
0.75
0.5
0.75
0.5
0.75
0.5
0.35
0.473684
0.344262
0.392857
0.75
0.48
0.529412
0.432836
0.4
0.388889
0.380952
0.25
0.483871
0.6875
0.5
0.75
0.75
0.5
0.75
0.47619
0.277778
0.523364
0.25
0.5
0.8
0.5
0.41982
0.666667
0.111111
0.557377
0.5
0.75
0.5
0.396226
0.366667
0.75
0.75
0.25
0.5
0.558824
0.75
0.25
0.5
0.75
0.75
0.714286
0.75
0.411765
0.5
0.75
0.571429
0.363636
0.5
0.75
0.75
0.75
0.75
0.75
0.75
0.5
0.4
0.521739
0.470588
0.75
0.403846
0.75
0.75
0.6
0.357143
0.75
0.534884
0.5
0.428571
0.75
0.75
0.5
0.75
0.342857
0.461538
0.380282
0.5
0.75
0.75
0.75
0.489796
0.75
0.304348
0.304348
0.555556
0.5
0.25
0.75
0.530612
0.365079
0.5
0.428571
0.5
0.371429
0.4
0.75
0.3125
0.75
0.516129
0.416667
0.75
0.5
0.285714
0.272727
0.333333
0.473684
0.5
0.75
0.75
0.428571
0.5
0.5
0.75
0.5
0.464789
0.554455
0.521739
0.527778
0.75
0.509434
0.5
0.488636
0.5
0.333333
0.75
0.272727
0.5
0.75
0.75
0.5
0.571429
0.380952
0.75
0.75
0.372549
0.450704
0.5625
0.4
0.5
0.557377
0.75
0.75
0.421053
0.558824
0.25
0.4375
0.375
0.75
0.75
0.454545
0.75
0.75
0.421053
0.576471
0.5
0.55814
0.75
0.617647
0.5
0.451613
0.75
0.75
0.5
0.75
0.5
0.5
0.385714
0.75
0.419355
0.75
0.5
0.422222
0.461538
0.5
0.5
0.478261
0.5
0.75
0.4375
0.421053
0.5
0.313559
0.5
0.75
0.714286
0.5
0.5
0.529412
0.75
0.5
0.5
0.5
0.551587
0.527778
0.5
0.5
0.625
0.75
0.75
0.5
0.75
0.75
0.318182
0.75
0.540984
0.25
0.75
0.5
0.25
0.535714
0.461538
0.36
0.75
0.75
0.25
0.75
0.25
0.464286
0.75
0.5
0.5
0.75
0.58319
0.4375
0.466667
0.75
0.75
0.521739
0.642857
0.368421
0.333333
0.4
0.423529
0.420455
0.5
0.3125
0.529412
0.5
0.75
0.5
0.75
0.5
0.25
0.75
0.321429
0.75
0.516129
0.5
0.5
0.8
0.421053
0.75
0.75
0.428571
0.75
0.75
0.5
0.75
0.4
0.75
0.75
0.25
0.338784
0.75
0.4375
0.833333
0.75
0.75
0.75
0.5
0.5
0.5
0.75
0.5
0.465517
0.75
0.333333
0.3
0.636364
0.25
0.272727
0.25
0.473684
0.461538
0.75
0.75
0.608696
0.571429
0.56
0.4
0.666667
0.75
0.75
0.545455
0.5625
0.75
0.5
0.75
0.461538
0.5
0.75
0.5
0.75
0.5
0.75
0.75
0.4
0.395349
0.375
0.307692
0.382166
0.75
0.5
0.340659
0.5
0.75
0.419355
0.142857
0.5
0.542553
0.75
0.642857
0.375
0.75
0.571429
0.5
0.557692
0.304348
0.6
0.403846
0.418182
0.75
0.580645
0.75
0.25
0.602888
0.75
0.5
0.325257
0.346988
0.75
0.75
0.451613
0.428571
0.410511
0.5625
0.5
0.490909
0.375
0.4375
0.354839
0.375
0.5
0.571429
0.409091
0.75
0.5
0.75
0.428571
0.472222
0.444444
0.75
0.460784
0.75
0.5
0.75
0.5
0.571429
0.75
0.394855
0.64
0.434783
0.5
0.75
0.363636
0.314286
0.277778
0.25
0.75
0.357143
0.5
0.75
0.75
0.456522
0.5
0.588235
0.75
0.461538
0.75
0.75
0.571429
0.5
0.75
0.75
0.4
0.75
0.436147
0.344828
0.75
0.75
0.75
0.75
0.5
0.75
0.315789
0.5
0.25
0.5
0.75
0.75
0.5
0.75
0.464286
0.75
1
0.428571
0.516129
0.326087
0.478261
0.466667
0.5
0.5
0.75
0.675676
0.75
0.384615
0.308756
0.482143
0.5
0.464567
0.5
0.666667
0.465116
0.285714
0.5
0.75
0.578947
0.692308
0.56
0.75
0.75
0.75
0.75
0.556818
0.588235
0.666667
0.328947
0.466443
0.5
0.409091
0.5
0.75
0.352941
0.365385
0.368421
0.75
0.75
0.75
0.526316
0.75
0.75
0.5
0.5
0.6
0.490909
0.75
0.75
0.4375
0.6
0.357143
0.5
0.75
0.75
0.44
0.431727
0.488273
0.5
0.75
0.375
0.5
0.6
0.5
0.75
0.534483
0.431034
0.540373
0.75
0.75
0.75
0.434783
0.3
0.5625
0.513889
0.463466
0.5
0.428571
0.478873
0.5
0.75
0.75
0.363636
0.48
0.75
0.309091
0.75
0.510204
0.5
0.75
0.75
0.466667
0.545455
0.5
0.75
0.75
0.75
0.75
0.75
0.48
0.54902
0.75
0.75
0.5
0.75
0.5
0.75
0.5
0.421053
0.75
0.5
0.75
0.578947
0.75
0.75
0.75
0.5
0.5
0.4
0.318182
0.75
0.534091
0.75
0.75
0.461538
0.833333
0.25
0.75
0.508197
0.5
0.461538
0.75
0.75
0.545455
0.5
0.492308
0.444444
0.571429
0.75
0.509091
0.75
0.75
0.5
0.75
0.25
0.392857
0.588235
0.75
0.6
0.75
0.25
0.75
0.594595
0.75
0.75
0.5
0.5
0.75
0.75
0.5
0.75
0.466667
0.444444
0.5
0.535971
0.5
0.481481
0.5
0.75
0.461538
0.6
0.5625
0.75
0.538462
0.5
0.346154
0.75
0.571429
0.75
0.75
0.5625
0.461538
0.5
0.454545
0.75
0.75
0.75
0.5
0.75
0.5
0.75
0.5
0.684211
0.75
0.5
0.5
0.285714
0.483871
0.75
0.75
0.333333
0.5
0.75
0.538462
0.333333
0.5
0.75
0.5
0.4
0.326087
0.2
0.75
0.5
0.4
0.75
0.75
0.5
0.381818
0.75
0.75
0.75
0.48
0.460526
0.5
0.5
0.75
0.75
0.75
0.75
0.318182
0.5
0.5
0.8
0.44
0.418182
0.419355
0.5
0.75
0.75
0.5625
0.470588
0.75
0.5
0.5
0.666667
0.5
0.75
0.678571
0.56
0.459459
0.75
0.75
0.5625
0.75
0.428571
0.314286
0.25
0.357955
0.4375
0.464286
0.4375
0.75
0.421687
0.5
0.75
0.345622
0.590164
0.454545
0.333333
0.75
0.5
0.5
0.5
0.5
0.75
0.75
0.75
0.7
0.25
0.420054
0.5
0.75
0.75
0.75
0.52439
0.5
0.5
0.5
0.434783
0.526316
0.75
0.5
0.5
0.5
0.461538
0.581818
0.75
0.431373
0.5
0.464286
0.428571
0.75
0.425
0.222222
0.5
0.75
0.75
0.428571
0.75
0.75
0.578947
0.75
0.5
0.75
0.75
0.390511
0.425347
0.5
0.39759
0.6
0.475
0.455128
0.444444
0.277992
0.5
0.426593
0.438356
0.5
0.5
0.4375
0.666667
0.5
0.5
0.25
0.5
0.75
0.75
0.75
0.75
0.75
0.6
0.75
0.351351
0.484375
0.5
0.75
0.75
0.75
0.5
0.25
0.25
0.461538
0.5
0.5
0.5
0.75
0.311475
0.75
0.5
0.75
0.75
0.75
0.75
0.4
0.75
0.75
0.75
0.384615
0.8
0.454545
0.25
0.75
0.4
0.516129
0.447368
0.5
0.75
0.75
0.75
0.5
0.5
0.75
0.75
0.5
0.318182
0.5
0.5
0.4
0.75
0.75
0.5
0.428571
0.44186
0.307692
0.75
0.526316
0.75
0.5
0.75
0.336323
0.666667
0.357143
0.355556
0.5
0.75
0.422794
0.310345
0.25
0.5
0.75
0.42093
0.5
0.25
0.368421
0.75
0.347826
0.557143
0.25
0.5
0.520833
0.714286
0.25
0.5
0.538462
0.75
0.5
0.4
0.542857
0.75
0.2
0.25
0.5
0.5
0.538462
0.6
1
0.75
0.684211
0.6875
0.75
0.714286
0.7
0.75
0.714286
0.75
0.75
0.525
0.75
0.5
0.5
0.465116
0.5
0.483871
0.166667
0.337748
0.372632
0.75
0.545455
0.590909
0.5
0.75
0.75
0.524691
0.388889
0.75
0.75
0.75
0.454545
0.5
0.75
0.526316
0.75
0.75
0.480769
0.48
0.75
0.348624
0.333333
0.315789
0.75
0.625
0.510417
0.5
0.479167
0.326087
0.75
0.433333
0.75
0.75
0.466667
0.526316
0.75
0.384615
0.470588
0.75
0.75
0.56
0.75
0.461538
0.677165
0.25
0.5
0.75
0.642857
0.75
0.448276
0.615385
0.580645
0.529412
0.75
0.75
0.5
0.75
0.545455
0.5
0.75
0.75
0.392857
0.25
0.540541
0.75
0.75
0.5
0.571429
0.620253
0.75
0.75
0.5
0.508197
0.75
0.490909
0.5
0.75
0.5
0.5
0.525
0.75
0.75
0.545455
0.5
0.75
0.75
0.25
0.5
0.513158
0.75
0.5
0.75
0.75
0.384615
0.5
0.75
0.333333
0.539474
0.75
0.75
0.5
0.405405
0.590909
0.5
0.607539
0.25
0.714286
0.4
0.5
0.75
0.75
0.463768
0.52
0.75
0.75
0.58209
0.482759
0.647727
0.75
0.45
0.75
0.375
0.372093
0.75
0.75
0.427174
0.5
0.75
0.5
0.551724
0.75
0.75
0.615385
0.75
0.75
0.5
0.24
0.5
0.469388
0.564103
0.75
0.75
0.75
0.5
0.75
0.363636
0.46789
0.25
0.360731
0.25
0.75
0.5
0.25
0.5
0.5
0.75
0.8
0.25
0.5
0.5
0.571429
0.5
0.333333
0.25
0.75
0.428571
0.5
0.75
0.5
0.75
0.304269
0.5
0.291667
0.32
0.5
0.5
0.75
0.540541
0.75
0.5
0.75
0.5
0.534884
0.3
0.457143
0.75
0.326087
0.5
0.7
0.532258
0.516129
0.75
0.75
0.5
0.75
0.75
0.75
0.75
0.75
0.526316
0.75
0.531915
0.75
0.5
0.55102
0.3125
0.25
0.578947
0.75
0.5
0.5
0.75
0.631579
0.407407
0.625
0.392157
0.305556
0.75
0.5
0.563636
0.75
0.5
0.75
0.472222
0.75
0.5
0.470588
0.5
0.545455
0.545455
0.75
0.62069
0.75
0.5
0.75
0.25
0.525
0.72
0.48
0.5
0.75
0.75
0.75
0.75
0.75
0.8
0.519231
0.5
0.456522
0.428571
0.435897
0.75
0.5
0.5
0.75
0.5
0.75
0.75
0.5
0.612245
0.527273
0.341021
0.75
0.473684
0.6
0.714286
0.75
0.75
0.75
0.5
0.255319
0.75
0.5
0.75
0.75
0.75
0.5
0.5
0.5
0.75
0.563636
0.452381
0.333333
0.454545
0.5
0.5
0.5
0.75
0.75
0.571429
0.666667
0.6
0.607143
0.75
0.5
0.75
0.75
0.571429
0.5
0.75
0.75
0.5
0.75
0.75
0.6
0.555556
0.6
0.714286
0.75
0.75
0.75

## Sheet: A5
ctrl	ACs	ATCs	AOCs	tDASGs	oDASGs
0.506494	0.5	0.5	0.538462	0.648649	0.33294
0.531915	0.421053	0.421053	0.322581	0.578947	0.347979
0.538462	0.272727	0.272727	0.571429	0.5625	0.677419
0.461538	0.611465	0.611465	0.507692	0.361111	0.577735
0.390411	0.291667	0.291667	0.285714	0.357143	0.629834
0.6	0.6	0.6	0.5625	0.526316	0.52459
0.5	0.285714	0.285714	0.714286		0.525
0.552239	0.47619	0.47619	0.33294		0.508571
0.384615	0.5	0.5	0.347979		0.390572
0.488889	0.470588	0.470588	0.575		0.39759
0.470588	0.511364	0.511364	0.5		0.625
0.5	0.333333	0.333333	0.341463		0.453488
0.428571	0.588608	0.588608	0.36		0.57
0.519231	0.5	0.5	0.692308		0.505263
0.654545	0.421053	0.421053	0.677419		0.454545
0.464516	0.620968	0.620968	0.285714		0.535714
0.615385	0.441176	0.441176	0.582418
0.322581	0.428571	0.428571	0.466667
0.615385	0.397959	0.397959	0.424051
0.548387	0.419355	0.419355	0.593985
0.485915	0.441176	0.441176	0.502146
0.325	0.5	0.5	0.577735
0.459459	0.481046	0.481046	0.482759
0.428571	0.556561	0.556561	0.384615
0.538462	0.538462	0.538462	0.458153
0.565217	0.425	0.425	0.4
0.645161	0.525	0.525	0.4
0.571429	0.4	0.4	0.493333
0.439024	0.2	0.2	0.556962
0.461538	0.546875	0.546875	0.4848
0.6	0.8	0.8	0.538462
0.330233	0.648649	0.648649	0.631579
0.571429	0.616114	0.616114	0.390805
0.72	0.568789	0.568789	0.357143
0.529412	0.55	0.55	0.6
0.590909	0.578947	0.578947	0.433628
0.352392	0.5625	0.5625	0.590909
0.384615	0.556962	0.556962	0.384615
0.384937	0.361111	0.361111	0.407407
0.383178	0.454545	0.454545	0.527174
0.404323	0.357143	0.357143	0.695652
0.424116	0.55102	0.55102	0.571429
0.461538	0.538462	0.538462	0.629834
0.434783	0.461538	0.461538	0.442623
0.561644	0.59434	0.59434	0.52459
0.44	0.6	0.6	0.525
0.53125	0.571429	0.571429	0.318182
0.5	0.583333	0.583333	0.508571
0.521277	0.426393	0.426393	0.511628
0.555556	0.4	0.4	0.472932
0.526316	0.526316	0.526316	0.578947
0.571429	0.588235	0.588235	0.390572
0.409091	0.368421	0.368421	0.39759
0.421053	0.44	0.44	0.37594
0.625	0.714286	0.714286	0.625
0.451613	0.629921	0.629921	0.4
0.545455	0.334163	0.334163	0.453488
0.655172	0.285714	0.285714	0.477495
0.7	0.550633	0.550633	0.578947
0.473684	0.578947	0.578947	0.470588
0.434568	0.451613	0.451613	0.458824
0.538462	0.538462		0.548387
0.4375	0.322581		0.472222
0.5	0.571429		0.57
0.407216	0.507692		0.454545
0.4	0.285714		0.5
0.563636	0.5625		0.522936
0.545455	0.714286		0.37931
0.272727	0.33294		0.505263
0.461538	0.347979		0.5
0.526316	0.575		0.371859
0.571429	0.5		0.518519
0.470588	0.341463		0.510204
0.526316	0.36		0.529412
0.315789	0.692308		0.6
0.2	0.677419		0.4
0.611465	0.285714		0.586957
0.625	0.582418		0.454545
0.478261	0.466667		0.387097
0.4	0.424051		0.567568
0.517857	0.593985		0.367347
0.291667	0.502146		0.653061
0.617647	0.577735		0.52459
0.52	0.482759		0.525
0.44	0.384615		0.4
0.614286	0.458153		0.521739
0.694444	0.4		0.5
0.625	0.4		0.535714
0.5625	0.493333		0.428571
0.75	0.556962		0.285714
0.4	0.4848		0.307692
0.351351	0.538462		0.285714
0.6	0.631579		0.44898
0.285714	0.390805		0.621622
0.25641	0.357143		0.642857
0.714286	0.6
0.444444	0.433628
0.6	0.590909
0.5	0.384615
0.285714	0.407407
0.5	0.527174
0.5625	0.695652
0.47619	0.571429
0.4	0.629834
0.428571	0.442623
0.396552	0.52459
0.392857	0.525
0.428571	0.318182
0.535714	0.508571
0.510204	0.511628
0.714286	0.472932
0.285714	0.578947
0.516129	0.390572
0.435484	0.39759
0.375	0.37594
0.304659	0.625
0.347979	0.4
0.575	0.453488
0.583333	0.477495
0.571429	0.578947
0.307692	0.470588
0.571429	0.458824
0.428571	0.548387
0.5	0.472222
0.5	0.57
0.428571	0.454545
0.56	0.5
0.396226	0.522936
0.471429	0.37931
0.3	0.505263
0.454545	0.5
0.461538	0.371859
0.538462	0.518519
0.440678	0.510204
0.365385	0.529412
0.461538	0.6
0.666667	0.4
0.341463	0.586957
0.521739	0.454545
0.36	0.387097
0.479167	0.567568
0.364706	0.367347
0.534091	0.653061
0.377049	0.52459
0.571429	0.525
0.5	0.4
0.692308	0.521739
0.526316	0.5
0.571429	0.535714
0.735294	0.428571
0.368421	0.285714
0.571429	0.307692
0.503759	0.285714
0.5	0.44898
0.483974	0.621622
0.444444	0.642857
0.333333
0.507042
0.36
0.447853
0.6
0.677419
0.470588
0.571429
0.402985
0.4
0.285714
0.511364
0.55
0.333333
0.354839
0.5
0.357143
0.26087
0.582418
0.432836
0.5
0.6
0.307692
0.5
0.4
0.588608
0.466667
0.375
0.4
0.430318
0.583333
0.469388
0.325
0.424051
0.473684
0.461538
0.5
0.373786
0.333333
0.571429
0.5
0.291667
0.8
0.5
0.593985
0.714286
0.481013
0.5
0.446565
0.571429
0.5
0.447368
0.384615
0.75
0.461538
0.454545
0.272727
0.45
0.384615
0.565217
0.502146
0.54878
0.615385
0.404255
0.421053
0.5
0.421053
0.538462
0.7
0.430622
0.428571
0.413043
0.620968
0.538462
0.5
0.5
0.461538
0.540541
0.384615
0.441176
0.428571
0.392857
0.6
0.428571
0.482759
0.6
0.387597
0.384615
0.351351
0.458153
0.4
0.25
0.416
0.307692
0.384615
0.612903
0.404762
0.365591
0.366667
0.37931
0.444444
0.578947
0.3125
0.4
0.397059
0.692308
0.571429
0.571429
0.375
0.493333
0.556962
0.428571
0.454545
0.6
0.5
0.397959
0.419355
0.395349
0.493671
0.5
0.441176
0.4848
0.578947
0.714286
0.5
0.615385
0.285714
0.48
0.2
0.5
0.391304
0.461538
0.428571
0.46875
0.625
0.416667
0.421053
0.545455
0.510791
0.558824
0.3125
0.481046
0.545455
0.556561
0.4375
0.538462
0.467202
0.736842
0.6
0.547826
0.547511
0.75
0.68
0.438776
0.565217
0.516129
0.444444
0.5
0.425
0.461538
0.647059
0.538462
0.453039
0.333333
0.461538
0.461538
0.75
0.333333
0.461538
0.461538
0.5
0.625
0.631579
0.542105
0.585366
0.4
0.390805
0.333333
0.444444
0.451613
0.49505
0.6
0.555556
0.357143
0.727273
0.333333
0.509091
0.405405
0.285714
0.625
0.525
0.3125
0.448718
0.530612
0.282609
0.571429
0.6
0.9
0.609375
0.4
0.48
0.571429
0.363636
0.6
0.4
0.295567
0.425676
0.433628
0.431741
0.590909
0.384615
0.414894
0.615385
0.546468
0.428571
0.5
0.636364
0.2
0.428571
0.544643
0.461538
0.285714
0.75
0.6
0
0.5
0.6
0.7
0.4
0.487218
0.474638
0.531915
0.521277
0.2
0.571429
0.546875
0.666667
0.475083
0.538462
0.428571
0.454545
0.555556
0.551724
0.45098
0.5
0.531915
0.586466
0.8
0.409836
0.6
0.379032
0.6
0.36
0.428571
0.625
0.6
0.461538
0.44
0.407407
0.714286
0.421053
0.448276
0.416667
0.5
0.428571
0.47541
0.461538
0.554545
0.375
0.392857
0.362069
0.558824
0.609375
0.677419
0.607143
0.578947
0.3125
0.581395
0.75
0.545455
0.5
0.545455
0.432692
0.428571
0.428571
0.527174
0.695652
0.537994
0.75
0.458824
0.328502
0.421875
0.465909
0.448276
0.4
0.5
0.583333
0.5
0.363636
0.485915
0.714286
0.571429
0.4375
0.48
0.325859
0.571429
0.470588
0.44186
0.428571
0.461538
0.571429
0.445122
0.432432
0.6
0.338235
0.328125
0.56
0.357143
0.6625
0.578947
0.6
0.532847
0.4375
0.5
0.545455
0.4
0.428571
0.616114
0.461538
0.5
0.6
0.2
0.384615
0.492188
0.5
0.615385
0.512821
0.44
0.464286
0.5
0.568789
0.372727
0.382609
0.545455
0.577465
0.584527
0.384615
0.53719
0.450366
0.416667
0.461538
0.428571
0.4
0.575758
0.647059
0.45
0.442623
0.447761
0.571429
0.6
0.322581
0.3418
0.373737
0.5
0.369803
0.365957
0.285714
0.428571
0.4
0.545455
0.52459
0.428571
0.6
0.444444
0.6
0.538462
0.8125
0.318182
0.285714
0.571429
0.451852
0.571429
0.2
0.511628
0.472932
0.55
0.578947
0.571429
0.6
0.485714
0.367347
0.509434
0.561983
0.333333
0.437345
0.5
0.5
0.571429
0.504899
0.37594
0.701493
0.75
0.578947
0.5625
0.625
0.556962
0.580645
0.633803
0.538462
0.5
0.6
0.333333
0.3875
0.368421
0.555556
0.384615
0.382979
0.6875
0.6
0.461538
0.4
0.75
0.625
0.526316
0.52
0.453488
0.5
0.38
0.588235
0.5
0.55
0.534884
0.421053
0.4
0.470588
0.5
0.477495
0.5
0.385965
0.5
0.567164
0.382353
0.454545
0.6
0.8
0.483871
0.333333
0.55102
0.454545
0.404762
0.538462
0.393502
0.391459
0.222222
0.666667
0.7
0.578947
0.428571
0.538462
0.538462
0.461538
0.538462
0.447715
0.456105
0.472543
0.5
0.2
0.4
0.464286
0.75
0.52
0.384615
0.578947
0.518519
0.40625
0.7
0.470588
0.458824
0.548387
0.25
0.55
0.472222
0.5125
0.461538
0.615385
0.5
0.329268
0.293103
0.428571
0.425
0.4
0.464286
0.4
0.461538
0.688525
0.465517
0.4
0.6
0.69697
0.333333
0.419617
0.466667
0.6
0.53125
0.56
0.428174
0.385965
0.454545
0.5
0.437788
0.435986
0.438356
0.441379
0.452055
0.510204
0.407407
0.333333
0.6
0.44
0.409091
0.461538
0.526316
0.543478
0.6
0.5
0.674419
0.522936
0.545455
0.285714
0.398496
0.416667
0.328125
0.52
0.857143
0.3625
0.666667
0.297297
0.4375
0.3
0.459459
0.545455
0.438596
0.538043
0.37931
0.4
0.575
0.470588
0.472727
0.425
0.571429
0.428571
0.428571
0.461538
0.428571
0.48
0.428571
0.585366
0.571429
0.461538
0.403509
0.464286
0.5
0.535714
0.326923
0.535714
0.371859
0.333333
0.454545
0.451613
0.636364
0.5
0.459459
0.361702
0.518519
0.510204
0.25
0.357143
0.642857
0.5
0.529412
0.423077
0.6
0.489796
0.571429
0.59434
0.714286
0.414414
0.513514
0.428571
0.485149
0.4
0.541667
0.56
0.413146
0.6
0.411765
0.4
0.333996
0.335938
0.333333
0.4
0.461538
0.586957
0.409091
0.8
0.538462
0.490476
0.387097
0.521739
0.666667
0.5
0.567568
0.333333
0.519231
0.526316
0.591837
0.571429
0.410256
0.588235
0.55814
0.253731
0.533333
0.367347
0.653061
0.545455
0.617512
0.75
0.4
0.654545
0.545455
0.52459
0.525
0.5
0.580645
0.426393
0.464516
0.5
0.4375
0.632653
0.75
0.619048
0.8
0.367089
0.4
0.5
0.426415
0.714286
0.4
0.4
0.468085
0.483607
0.375
0.192308
0.483871
0.540541
0.4
0.571429
0.7
0.5
0.538462
0.538462
0.571429
0.4
0.514286
0.75
0.521739
0.461538
0.3
0.5
0.384615
0.5625
0.375
0.4
0.37234
0.419355
0.34375
0.5
0.538462
0.4
0.464286
0.571429
0.530435
0.588235
0.6
0.368421
0.521739
0.5
0.538462
0.466019
0.386667
0.384615
0.44
0.516129
0.558824
0.714286
0.428571
0.629921
0.25
0.555556
0.334163
0.297297
0.384615
0.522936
0.333333
0.575
0.285714
0.307692
0.285714
0.529412
0.4375
0.44898
0.550633
0.371429
0.557692
0.428571
0.45
0.64
0.692308
0.621622
0.75
0.5
0.446237
0.230769
0.384615
0.642857
0.235294
0.5625
0.452381
0.408451
0.460905
0.609756
0.4
0.578947
0.451613
0.307692
0.632653
0.461538

## Sheet: RI
ctrl	ACs	ATCs	AOCs	tDASGs	oDASGs
0.28866	0.529126	0.319565	0.529126	0.403922	0.317757
0.449541	0.473684	0.321486	0.473684	0.401786	0.344086
0.293578	0.518797	0.403922	0.518797	0.378378	0.344828
0.25	0.588235	0.473684	0.588235
0.405063	0.317757	0.384615	0.317757
0.531646	0.344086	0.422535	0.344086
0.319565	0.344444	0.37037	0.344444
0.321486	0.344828	0.31383	0.344828
0.322581	0.37	0.258929	0.37
0.357143	0.351852	0.428571	0.351852
0.464088	0.472546	0.407678	0.472546
0.675676	0.473572	0.429674	0.473572
0.509091	0.409836	0.417722	0.409836
0.323232	0.31746	0.406593	0.31746
0.413194	0.327869	0.449541	0.327869
0.376923	0.520408	0.310714	0.520408
0.513514	0.425926	0.604651	0.425926
0.413994	0.341176	0.243902	0.341176
0.399417	0.349057	0.377193	0.349057
0.357143	0.42765	0.345133	0.42765
0.466472	0.362416	0.406814	0.362416
0.345088	0.360902	0.31746	0.360902
0.365931	0.204545	0.194805	0.204545
0.363014	0.362319	0.563107	0.362319
0.316456	0.4125	0.425693	0.4125
0.393443	0.380435	0.369231	0.380435
0.393939	0.255814	0.306818	0.255814
0.49505	0.4375	0.419504	0.4375
0.353495	0.513514	0.488506	0.513514
0.32948	0.394687	0.47561	0.394687
0.535248	0.319565	0.488372
0.529126	0.321486	0.255319
0.330882	0.403922	0.401786
0.369004	0.473684	0.43299
0.39441	0.384615	0.319006
0.397968	0.422535	0.324074
0.375	0.37037	0.427907
0.473684	0.31383	0.425532
0.432099	0.258929	0.39726
0.473684	0.428571	0.378378
0.423237	0.407678	0.306818
0.447059	0.429674	0.338403
0.384615	0.417722	0.540541
0.414861	0.406593	0.305556
0.353659	0.449541
0.417722	0.310714
0.492537	0.604651
0.488722	0.243902
0.407895	0.377193
0.360316	0.345133
0.439655	0.406814
0.422535	0.31746
0.265823	0.194805
0.316456	0.563107
0.5	0.425693
0.368421	0.369231
0.328767	0.306818
0.485714	0.419504
0.435294	0.488506
0.278689	0.47561
0.518797	0.488372
0.588235	0.255319
0.333333	0.401786
0.43038	0.43299
0.414286	0.319006
0.443182	0.324074
0.28436	0.427907
0.32991	0.425532
0.302632	0.39726
0.37037	0.378378
0.31383	0.306818
0.485714	0.338403
0.264706	0.540541
0.344444	0.305556
0.538117
0.456522
0.27907
0.535849
0.315789
0.282609
0.421965
0.415473
0.413194
0.258929
0.428571
0.440367
0.445946
0.344482
0.488889
0.373494
0.365079
0.265823
0.328947
0.333333
0.467391
0.412524
0.359073
0.278351
0.627907
0.31068
0.435644
0.391304
0.32
0.256098
0.298077
0.352941
0.405556
0.352941
0.298077
0.352941
0.376471
0.35814
0.246154
0.280488
0.310345
0.743902
0.329114
0.486486
0.5
0.403226
0.403226
0.407678
0.37487
0.428571
0.468354
0.37
0.311688
0.302326
0.351852
0.385246
0.337209
0.393296
0.429674
0.417722
0.485915
0.394737
0.375
0.406593
0.373984
0.394558
0.446701
0.416543
0.395833
0.325424
0.449541
0.425532
0.447917
0.451282
0.468085
0.484848
0.411765
0.321839
0.5
0.310714
0.350485
0.34557
0.34557
0.434211
0.452763
0.286957
0.472546
0.473572
0.283333
0.357798
0.486842
0.604651
0.348315
0.37037
0.243902
0.377193
0.476923
0.44
0.428571
0.438356
0.5
0.313953
0.303371
0.270588
0.276316
0.35443
0.345133
0.406814
0.409836
0.274809
0.428571
0.468966
0.408333
0.543478
0.31746
0.487805
0.194805
0.37594
0.4375
0.4
0.320513
0.283784
0.563107
0.522427
0.609375
0.395833
0.375
0.420635
0.231579
0.681818
0.328358
0.414557
0.329268
0.265823
0.309278
0.312977
0.3625
0.327869
0.289157
0.335537
0.358491
0.358974
0.395604
0
0.394904
0.322368
0.335013
0.364807
0.425693
0.325581
0.369231
0.457627
0.257426
0.3125
0.326271
0.476684
0.432432
0.455357
0.451613
0.296296
0.609375
0.528455
0.486111
0.337278
0.394737
0.306818
0.326733
0.289256
0.414286
0.35814
0.529412
0.253731
0.419504
0.415162
0.561404
0.3125
0.441558
0.488506
0.379747
0.309859
0.472727
0.434783
0.384615
0.372093
0.358209
0.404372
0.392405
0.520408
0.536082
0.426966
0.425926
0.321168
0.458824
0.313253
0.47561
0.488372
0.255319
0.369427
0.390244
0.43299
0.357798
0.395939
0.360898
0.367089
0.356061
0.36
0.452632
0.349025
0.337998
0.319006
0.295918
0.4
0.32716
0.645161
0.441315
0.389865
0.361111
0.341176
0.383205
0.372549
0.295455
0.470588
0.406962
0.324074
0.307229
0.349057
0.302521
0.606557
0.327068
0.348366
0.42765
0.490446
0.423529
0.427907
0.438356
0.422311
0.424658
0.425974
0.362416
0.204545
0.407895
0.375
0.294686
0.308642
0.425532
0.362319
0.39726
0.4125
0.335821
0.560976
0.551724
0.478485
0.39801
0.366755
0.321782
0.315315
0.300412
0.299145
0.435897
0.322314
0.31
0.331325
0.365625
0.38835
0.368421
0.380435
0.330357
0.515152
0.361111
0.326923
0.365269
0.367089
0.383562
0.306818
0.381906
0.288136
0.191781
0.442308
0.358844
0.332454
0.255814
0.365854
0.560284
0.452055
0.430473
0.32
0.335329
0.470914
0.298305
0.338403
0.542553
0.443983
0.316129
0.493151
0.419643
0.413655
0.420455
0.481013
0.540541
0.4375
0.556701
0.55
0.52459
0.550459
0.510417
0.513514
0.516129
0.394687
0.394407
0.414764
0.397727
0.454545
0.379747
0.588235
0.365854
0.305556
0.506849
0.362416
0.231579
0.361111
0.323529

## Sheet: SE
ctrl	ACs	ATCs	AOCs	tDASGs	oDASGs
0.362205	0.357143	0.357143	0.584951	0.52	0.523364
0.454545	0.479339	0.479339	0.528926	0.393701	0.403226
0.457143	0.556122	0.556122	0.519231	0.428571	0.390625
0.444444	0.441558	0.441558	0.461538	0.61204	0.377049
0.506944	0.429417	0.429417	0.512821	0.494382	0.48
0.590604	0.60355	0.60355	0.669291	0.359375	0.475
0.533333	0.470588	0.470588	0.472727	0.485728	0.547945
0.578512	0.481258	0.481258	0.469565	0.586207	0.513812
0.569378	0.474576	0.474576	0.5	0.420561	0.409449
0.617284	0.440932	0.440932	0.5	0.506849	0.544304
0.565217	0.412589	0.412589	0.575	0.597561	0.584746
0.567308	0.526316	0.526316	0.58	0.469388	0.5
0.610599	0.607143	0.607143	0.448276	0.584906	0.615385
0.484694	0.626168	0.626168	0.421053	0.531915	0.573171
0.627273	0.52	0.52	0.528662	0.651026	0.651934
0.585586	0.554526	0.554526	0.42623	0.532609	0.431034
0.537815	0.393701	0.393701	0.522059	0.606299	0.628866
0.508197	0.555556	0.555556	0.597561	0.461538	0.5
0.481481	0.517647	0.517647	0.655556	0.513514	0.358025
0.553571	0.560748	0.560748	0.523364	0.468354	0.493506
0.392857	0.574803	0.574803	0.567568	0.413793	0.443299
0.625	0.426778	0.426778	0.52381	0.545455	0.567568
0.488372	0.514925	0.514925	0.431373	0.5	0.465116
0.5	0.441558	0.441558	0.472973	0.28125	0.49635
0.564103	0.514286	0.514286	0.53719	0.470588	0.43038
0.590164	0.428571	0.428571	0.605505	0.444444	0.636364
0.648276	0.516667	0.516667	0.552941	0.5	0.705882
0.522388	0.61204	0.61204	0.54023	0.521739
0.584951	0.443299	0.443299	0.547059	0.5
0.621053	0.333333	0.333333	0.453125	0.381818
0.632911	0.428571	0.428571	0.449153	0.616438
0.534884	0.484375	0.484375	0.505882	0.656051
0.518987	0.414062	0.414062	0.529412	0.614754
0.666667	0.529412	0.529412	0.403226	0.597015
0.61413	0.469697	0.469697	0.543046	0.473684
0.67033	0.509091	0.509091	0.570093	0.617647
0.453488	0.481481	0.481481	0.713235	0.46875
0.590909	0.431818	0.431818	0.607843	0.609375
0.5	0.467532	0.467532	0.518519	0.61194
0.591133	0.623529	0.623529	0.489583	0.60274
0.516129	0.494382	0.494382	0.536082	0.617647
0.551181	0.442308	0.442308	0.419355	0.486486
0.528169	0.525	0.525	0.439024	0.52
0.518868	0.445378	0.445378	0.390625	0.590909
0.695652	0.428571	0.428571	0.6875	0.683453
0.391304	0.375	0.375	0.540107	0.467391
0.540816	0.575	0.575	0.433333	0.632075
0.624309	0.409836	0.409836	0.482759	0.534884
0.541284	0.533835	0.533835	0.603774	0.56
0.541284	0.511111	0.511111	0.52	0.428571
0.469388	0.568182	0.568182	0.5	0.454545
0.479167	0.52	0.52	0.454545	0.457143
0.490909	0.517241	0.517241	0.478049	0.424242
0.438017	0.563492	0.563492	0.505495	0.469388
0.430233	0.438356	0.438356	0.483871	0.530612
0.504348	0.626667	0.626667	0.527644	0.44
0.513043	0.609375	0.609375	0.436364	0.409091
0.513043	0.359375	0.359375	0.315789	0.475828
0.454545	0.621053	0.621053	0.53886	0.465909
0.587302	0.485728	0.485728	0.376812	0.415584
0.571429	0.3	0.3	0.382353	0.631579
0.385965	0.5625	0.5625	0.622857	0.484375
0.60396	0.374269	0.374269	0.322314	0.384615
0.46875	0.477941	0.477941	0.387097	0.588235
0.372549	0.586207	0.586207	0.413043	0.442857
0.413043	0.420561	0.420561	0.477419	0.58209
0.524194	0.44086	0.44086	0.365385	0.538462
0.516736	0.413589	0.413589	0.433333	0.557377
0.540373	0.492228	0.492228	0.377049	0.589744
0.556818	0.506849	0.506849	0.553846	0.4352
0.572519	0.431052	0.431052	0.571429	0.44426
0.596026	0.529412	0.529412	0.458896	0.506667
0.474286	0.597561	0.597561	0.589286	0.457627
0.526316	0.61165	0.61165	0.512987	0.558758
0.61165	0.445378	0.445378	0.430233	0.595867
0.528926	0.610256	0.610256	0.470588	0.519481
0.495413	0.618321	0.618321	0.560748	0.481481
0.514286	0.623734	0.623734	0.421053	0.55814
0.684932	0.406036	0.406036	0.5	0.535749
0.533333	0.531646	0.531646	0.46281	0.476923
0.507463	0.431034	0.431034	0.578947	0.465364
0.577236	0.452055	0.452055	0.428571
0.505495	0.488372	0.488372	0.5
0.543478	0.4375	0.4375	0.563636
0.631399	0.454545	0.454545	0.5
0.539216	0.557692	0.557692	0.460317
0.578947	0.469388	0.469388	0.470779
0.632	0.584906	0.584906	0.42623
0.539474	0.364706	0.364706	0.48
0.554054	0.354839	0.354839	0.475
0.422222	0.453125	0.453125	0.547945
0.45614	0.5	0.5	0.516129
0.651163	0.51083	0.51083	0.457143
0.573529	0.49635	0.49635	0.566372
0.585586	0.493882	0.493882	0.56
0.651852	0.573826	0.573826	0.432432
0.6	0.488372	0.488372	0.52
0.505263	0.507042	0.507042	0.8
0.493333	0.588785	0.588785	0.473684
0.473118	0.531915	0.531915	0.414286
0.504854	0.413793	0.413793	0.509434
0.518519	0.463415	0.463415	0.557047
0.571429	0.465347	0.465347	0.513812
0.552381	0.433333	0.433333	0.409449
0.479167	0.396947	0.396947	0.527559
0.504132	0.352941	0.352941	0.5
0.558594	0.583893	0.583893	0.5
0.5	0.525057	0.525057	0.541667
0.55102	0.450382	0.450382	0.537634
0.503401	0.651026	0.651026	0.421053
0.553191	0.5	0.5	0.61086
0.555556	0.532609	0.532609	0.380952
0.474708	0.514286	0.514286	0.391304
0.482143	0.532258	0.532258	0.52907
0.515464	0.606299	0.606299	0.623116
0.457447	0.489362	0.489362	0.475728
0.534314	0.470588	0.470588	0.465753
0.630137	0.363636	0.363636	0.375
0.403846	0.56044	0.56044	0.381538
0.434211	0.403846	0.403846	0.415929
0.519231	0.551724	0.551724	0.496241
0.496296	0.462158	0.462158	0.441558
0.5	0.636042	0.636042	0.475
0.456311	0.448718	0.448718	0.544304
0.541935	0.692308	0.692308	0.510204
0.574257	0.693548	0.693548	0.591304
0.468531	0.615385	0.615385	0.473684
0.546763	0.357143	0.357143	0.391892
0.520202	0.5	0.5	0.662722
0.530612	0.461538	0.461538	0.66055
0.410256	0.513514	0.513514	0.5
0.440678	0.615385	0.615385	0.535714
0.514925	0.468354	0.468354	0.361702
0.403226	0.42623	0.42623	0.559055
0.505882	0.513514	0.513514	0.493671
0.460938	0.410959	0.410959	0.452055
0.560976	0.44186	0.44186	0.4375
0.543478	0.393443	0.393443	0.459854
0.527273	0.411765	0.411765	0.421569
0.35	0.413793	0.413793	0.653061
0.407407	0.516129	0.516129	0.44086
0.628931	0.515464	0.515464	0.553571
0.455056	0.513761	0.513761	0.5625
0.415584	0.545455	0.545455	0.485714
0.521505	0.509434	0.509434	0.697436
0.596154	0.535433	0.535433	0.402985
0.588235	0.5	0.5	0.525
0.401869	0.462069	0.462069	0.493506
0.520548	0.442623	0.442623	0.567797
0.444444	0.460526	0.460526	0.473684
0.46595	0.465116	0.465116	0.589286
0.452308	0.524362	0.524362	0.523077
0.473029	0.466667	0.466667	0.51087
0.647059	0.28125	0.28125	0.516484
0.517241	0.494186	0.494186	0.648148
0.565789	0.436548	0.436548	0.521739
0.434483	0.538813	0.538813	0.487805
0.414286	0.556818	0.556818	0.584746
0.604255	0.433333	0.433333	0.453826
0.333333	0.52	0.52	0.5
0.661417	0.442857	0.442857	0.480447
0.5	0.631068	0.631068	0.534884
0.561224	0.464286	0.464286	0.378049
0.510638	0.45	0.45	0.442623
0.5	0.421053	0.421053	0.45
0.526316	0.568182	0.568182	0.396104
0.62963	0.470588	0.470588	0.586207
0.589189	0.606061	0.606061	0.522727
0.44186	0.435484	0.435484	0.571429
0.474286	0.504132	0.504132	0.477064
0.5	0.464052	0.464052	0.494737
0.587879	0.496933	0.496933	0.525
0.649007	0.590909	0.590909	0.48887
0.598039	0.382353	0.382353	0.546012
0.55814	0.566667	0.566667	0.574803
0.547619	0.675	0.675	0.569231
0.456461	0.502488	0.502488	0.534965
0.469231	0.554101	0.554101	0.615385
0.524664	0.38806	0.38806	0.723077
0.503145	0.512438	0.512438	0.537549
0.418994	0.561644	0.561644	0.573171
0.46	0.543307	0.543307	0.621622
0.4	0.494845	0.494845	0.625
0.457944	0.40625	0.40625	0.534759
0.44382	0.444444	0.444444	0.522388
0.495935	0.486486	0.486486	0.435484
0.396396	0.5	0.5	0.507463
0.370787	0.521739	0.521739	0.651934
0.7	0.5	0.5	0.494949
0.454545	0.524476	0.524476	0.465753
0.46	0.529412	0.529412	0.514706
0.393443	0.551515	0.551515	0.507692
0.520072	0.585586	0.585586	0.431034
0.448276	0.321429	0.321429	0.554217
0.54717	0.6	0.6	0.609375
0.5	0.381818	0.381818	0.47541
0.455882	0.493002	0.493002	0.538462
0.5	0.346939	0.346939	0.469697
0.474138	0.5	0.5	0.52907
0.484375	0.615385	0.615385	0.314815
0.581395	0.616438	0.616438	0.539326
0.4375	0.571429	0.571429	0.5
0.377358	0.607143	0.607143	0.551724
0.409091	0.488372	0.488372	0.459016
0.541667	0.59375	0.59375	0.511628
0.488095	0.48	0.48	0.44086
0.437908	0.442177	0.442177	0.545455
0.535211	0.444444	0.444444	0.473684
0.427273	0.575	0.575	0.418605
0.436027	0.542945	0.542945	0.5
0.403509	0.542662	0.542662	0.486486
0.416399	0.478723	0.478723	0.45
0.39823	0.511364	0.511364	0.557692
0.439024	0.533333	0.533333	0.426829
0.509091	0.581395	0.581395	0.482353
0.5	0.456522	0.456522	0.557143
0.516484	0.656051	0.656051	0.450549
0.41477	0.630435	0.630435	0.488095
0.441558	0.592593	0.592593	0.53
0.455757	0.612069	0.612069	0.628866
0.512255	0.614754	0.614754	0.477273
0.439024	0.435644	0.435644	0.360656
0.432692	0.361702	0.361702	0.485086
0.525424	0.7	0.7	0.5
0.487179	0.510791	0.510791	0.41196
0.54918	0.506757	0.506757	0.5
0.428571	0.384615	0.384615	0.369048
0.589147	0.545455	0.545455	0.488372
0.580952	0.597015	0.597015	0.508671
0.561224	0.488372	0.488372	0.456311
0.516484	0.489796	0.489796	0.526316
0.503937	0.586957	0.586957	0.474227
0.477941	0.418605	0.418605	0.5
0.494253	0.4	0.4	0.494505
0.46	0.471698	0.471698	0.5
0.549223	0.473684	0.473684	0.46875
0.551724	0.636964	0.636964	0.52
0.5	0.643438	0.643438	0.493506
0.567251	0.5	0.5	0.515152
0.46063	0.584746	0.584746	0.617647
0.513274	0.548837	0.548837	0.500935
0.357143	0.5	0.5	0.443299
0.522936	0.521739	0.521739	0.640777
0.405405	0.5	0.5	0.567568
0.457944	0.6	0.6	0.586207
0.412162	0.463918	0.463918	0.484375
0.45098	0.5	0.5	0.35
0.487179	0.617647	0.617647	0.491803
0.484375	0.676056	0.676056	0.424051
0.470588	0.579882	0.579882	0.392857
0.478261	0.318182	0.318182	0.567416
0.421053	0.513514	0.513514	0.477064
0.478873	0.419355	0.419355	0.463594
0.4	0.632911	0.632911	0.465116
0.505682	0.548148	0.548148	0.49635
0.333333	0.586207	0.586207	0.481481
0.476744	0.46087	0.46087	0.488462
0.512605	0.597403	0.597403	0.490909
0.545455	0.489796	0.489796	0.578947
0.456954	0.536585	0.536585	0.428571
0.42029	0.445122	0.445122	0.593458
0.410959	0.395062	0.395062	0.459459
0.472222	0.480519	0.480519	0.505155
0.485294	0.579545	0.579545	0.5
0.648799	0.42236	0.42236	0.429688
0.427506	0.39604	0.39604	0.473684
0.48913	0.46875	0.46875	0.496689
0.488372	0.447059	0.447059	0.430399
0.553191	0.465517	0.465517	0.289855
0.547945	0.575	0.575	0.5
0.647727	0.528571	0.528571	0.43038
0.621951	0.487805	0.487805	0.507143
0.513761	0.415734	0.415734	0.447917
0.59292	0.55814	0.55814	0.475806
0.513514	0.409091	0.409091	0.534091
0.551751	0.476589	0.476589	0.411765
0.459016	0.525	0.525	0.615385
0.372263	0.609375	0.609375	0.472727
0.423077	0.61194	0.61194	0.668712
0.401747	0.60274	0.60274	0.401125
0.453782	0.469388	0.469388	0.436364
0.392405	0.617647	0.617647	0.561224
0.440559	0.592593	0.592593	0.621908
0.457143	0.5	0.5	0.285714
0.439024	0.542857	0.542857	0.557143
0.492308	0.552941	0.552941	0.445946
0.533333	0.486486	0.486486	0.505882
0.454054	0.43578	0.43578	0.495238
0.462428	0.586207	0.586207	0.285714
0.533333	0.590164	0.590164	0.461538
0.457364	0.5	0.5	0.390244
0.438095	0.4	0.4	0.472727
0.517857	0.52	0.52	0.439024
0.510638	0.526316	0.526316	0.37931
0.45098	0.531532	0.531532	0.516
0.49	0.461538	0.461538	0.517647
0.415493	0.605505	0.605505	0.5
0.46087	0.487805	0.487805	0.609342
0.5	0.590909	0.590909	0.456693
0.453608	0.44186	0.44186	0.509434
0.563107	0.692308	0.692308	0.636364
0.522727	0.683453	0.683453	0.474747
0.575342	0.44898	0.44898	0.517857
0.52809	0.467391	0.467391	0.5625
0.486486	0.513514	0.513514	0.387097
0.463415	0.530303	0.530303	0.478992
0.453488	0.611765	0.611765	0.444444
0.428571	0.632075	0.632075	0.4
0.444444	0.557377	0.557377	0.52381
0.496503	0.468085	0.468085	0.688372
0.555556	0.647727	0.647727	0.581395
0.421875	0.590164	0.590164	0.566667
0.49	0.551724	0.551724	0.435644
0.518248	0.629032	0.629032	0.465649
0.42623	0.44898	0.44898	0.512195
0.466102	0.545064	0.545064	0.421875
0.454545	0.5	0.5	0.603448
0.576159	0.478555	0.478555	0.46789
0.524752	0.5	0.5	0.538462
0.59375	0.534884	0.534884	0.536765
0.569892	0.587983	0.587983	0.610795
0.43662	0.520661	0.520661	0.510638
0.421053	0.484615	0.484615	0.545455
0.436364	0.419753	0.419753	0.5
0.434783	0.54878	0.54878	0.4
0.492754	0.626374	0.626374	0.621495
0.503704	0.574468	0.574468	0.556213
0.423729	0.489933	0.489933	0.654088
0.52518	0.56	0.56	0.480769
0.474747	0.43617	0.43617	0.675
0.5	0.556522	0.556522	0.705882
0.486486	0.469388	0.469388	0.578947
0.558824	0.55	0.55	0.669643
0.52	0.477273	0.477273	0.478261
0.484615	0.362069	0.362069	0.584615
0.528926	0.428571	0.428571	0.58794
0.455446	0.454545	0.454545	0.625
0.495726	0.56701	0.56701	0.473684
0.458824	0.457143	0.457143	0.528571
0.54902	0.382812	0.382812	0.505495
0.508197	0.424242	0.424242	0.478723
0.523256	0.430108	0.430108	0.482051
0.473684	0.5	0.5	0.726027
0.489796	0.451613	0.451613	0.435484
0.486339	0.469388	0.469388	0.514286
0.487805	0.493073	0.493073	0.5
0.42	0.515789	0.515789	0.37963
0.469136	0.464286	0.464286	0.341463
0.492424	0.5	0.5	0.55102
0.494186	0.545455	0.545455	0.463918
0.490385	0.543478	0.543478	0.424242
0.478261	0.52968	0.52968	0.355932
0.488889	0.446602	0.446602	0.465517
0.428571	0.565217	0.565217	0.636364
0.415842	0.507092	0.507092	0.466667
0.47482	0.531332	0.531332	0.545455
0.424779	0.530612	0.530612	0.621053
0.469388	0.382716	0.382716	0.536585
0.465347	0.450549	0.450549	0.564935
0.472222	0.513889	0.513889	0.581818
0.505263	0.44	0.44	0.535714
0.459016	0.409091	0.409091	0.587156
0.460784	0.461538	0.461538	0.491803
0.432836	0.420635	0.420635	0.458498
0.352941	0.381356	0.381356	0.55102
0.487923	0.497093	0.497093	0.608696
0.594077	0.466667	0.466667	0.56701
0.395833	0.382353	0.382353	0.634483
0.586207	0.391304	0.391304	0.5625
0.441176	0.6	0.6	0.561798
0.558824	0.538028	0.538028	0.567696
0.453071	0.542857	0.542857	0.558758
0.521841	0.526316	0.526316	0.511905
0.5	0.475828	0.475828
0.466667	0.501721	0.501721
0.454545	0.578947	0.578947
0.46	0.645098	0.645098
0.52	0.51	0.51
0.480447	0.530612	0.530612
0.415385	0.358025	0.358025
0.556122	0.532258	0.532258
0.533654	0.431034	0.431034
0.489655	0.465909	0.465909
0.391304	0.556098	0.556098
0.444444	0.514451	0.514451
0.409639	0.451613	0.451613
0.373239	0.513158	0.513158
0.461538	0.626667	0.626667
0.5	0.395161	0.395161
0.441558	0.5	0.5
0.604167	0.415584	0.415584
0.583333	0.297297	0.297297
0.5	0.461538	0.461538
0.44086	0.678571	0.678571
0.375	0.532609	0.532609
0.374302	0.467949	0.467949
0.458333	0.631579	0.631579
0.457143	0.484375	0.484375
0.375	0.570732	0.570732
0.506667	0.522293	0.522293
0.486842	0.585106	0.585106
0.4875	0.578313	0.578313
0.414414	0.617647	0.617647
0.478261	0.514286	0.514286
0.412698	0.398058	0.398058
0.524272	0.485714	0.485714
0.629921	0.384615	0.384615
0.550633	0.466667	0.466667
0.480769	0.507042	0.507042
0.553191	0.437126	0.437126
0.459016	0.588235	0.588235
0.5	0.464912	0.464912
0.527273	0.431579	0.431579
0.459459	0.4	0.4
0.527426	0.442857	0.442857
0.482759	0.392857	0.392857
0.6	0.58209	0.58209
0.53719	0.449153	0.449153
0.457143	0.488372	0.488372
0.530952	0.556701	0.556701
0.494845	0.56	0.56
0.465116	0.479452	0.479452
0.418605	0.534247	0.534247
0.478632	0.589041	0.589041
0.409091	0.543307	0.543307
0.522124	0.488462	0.488462
0.442623	0.543124	0.543124
0.441718	0.470588	0.470588
0.427273	0.580645	0.580645
0.468254	0.590164	0.590164
0.382353	0.428571	0.428571
0.482412	0.38806	0.38806
0.453608	0.561644	0.561644
0.488784	0.472727	0.472727
0.408163	0.517647	0.517647
0.416667	0.525	0.525
0.432836	0.538462	0.538462
0.506024	0.590909	0.590909
0.489583	0.457589	0.457589
0.5	0.566265	0.566265
0.488372	0.466667	0.466667
0.455782	0.425	0.425
0.436508	0.621359	0.621359
0.536458	0.464455	0.464455
0.408451	0.401869	0.401869
0.475	0.38961	0.38961
0.411215	0.55814	0.55814
0.476378	0.590164	0.590164
0.42069	0.638889	0.638889
0.390244	0.553846	0.553846
0.416667	0.553398	0.553398
0.5	0.42029	0.42029
0.494118	0.389831	0.389831
0.518072	0.44	0.44
0.459677	0.447761	0.447761
0.473684	0.461538	0.461538
0.473988	0.408163	0.408163
0.471429	0.439024	0.439024
0.403727	0.557377	0.557377
0.505882	0.375	0.375
0.505618	0.514286	0.514286
0.52459	0.504762	0.504762
0.526316	0.57732	0.57732
0.55814	0.413953	0.413953
0.506329	0.581395	0.581395
0.55625	0.581081	0.581081
0.463855	0.457364	0.457364
0.528571	0.53125	0.53125
0.475	0.464286	0.464286
0.55814	0.445652	0.445652
0.491935	0.589744	0.589744
0.521739	0.55625	0.55625
0.435115	0.4352	0.4352
0.447619	0.348837	0.348837
0.43038	0.521739	0.521739
0.520661	0.532609	0.532609
0.432432	0.707317	0.707317
0.472973	0.470588	0.470588
0.407407	0.577778	0.577778
0.537736	0.425532	0.425532
0.619048	0.411765	0.411765
0.510791	0.557143	0.557143
0.488722	0.479245	0.479245
0.413793	0.51943	0.51943
0.557047	0.350877	0.350877
0.403509	0.541899	0.541899
0.437956	0.383838	0.383838
0.40566	0.372093	0.372093
0.496933	0.436893	0.436893
0.46	0.492537	0.492537
0.571429	0.532374	0.532374
0.482143	0.6875	0.6875
0.48037	0.441176	0.441176
0.5	0.530612	0.530612
0.597015	0.623529	0.623529
0.570552	0.617021	0.617021
0.49481	0.638298	0.638298
0.409836	0.44426	0.44426
0.40843	0.533898	0.533898
0.434555	0.469388	0.469388
0.460808	0.508197	0.508197
0.429417	0.46281	0.46281
0.447761	0.493333	0.493333
0.47449	0.556122	0.556122
0.464896	0.506667	0.506667
0.518868	0.484375	0.484375
0.5	0.46789	0.46789
0.506329	0.457627	0.457627
0.526316	0.483871	0.483871
0.47619	0.368421	0.368421
0.7	0.485714	0.485714
0.473684	0.454545	0.454545
0.425532	0.477273	0.477273
0.481013	0.558758	0.558758
0.556818	0.439655	0.439655
0.505618	0.607096	0.607096
0.534884	0.595867	0.595867
0.40678	0.519481	0.519481
0.406593	0.55814	0.55814
0.563536	0.483607	0.483607
0.55102	0.675676	0.675676
0.424242	0.423729	0.423729
0.414062	0.524957	0.524957
0.425	0.535714	0.535714
0.438776	0.410256	0.410256
0.511628	0.5	0.5
0.505814	0.5	0.5
0.5	0.508475	0.508475
0.507246	0.442623	0.442623
0.488372	0.520548	0.520548
0.47541	0.416667	0.416667
0.535211	0.453125	0.453125
0.573438	0.457143	0.457143
0.507692	0.539474	0.539474
0.475248	0.453125	0.453125
0.46875	0.45	0.45
0.461538	0.453125	0.453125
0.512821	0.441176	0.441176
0.493671	0.461538	0.461538
0.346154	0.472727	0.472727
0.5	0.472727	0.472727
0.463415	0.458479	0.458479
0.488789	0.52459	0.52459
0.373626	0.60241	0.60241
0.511905	0.580153	0.580153
0.491525	0.481481	0.481481
0.488372	0.483871	0.483871
0.458564	0.498927	0.498927
0.60355	0.504348	0.504348
0.515464	0.483871	0.483871
0.537736	0.45	0.45
0.517241	0.55814	0.55814
0.509615	0.524116	0.524116
0.503226	0.568966	0.568966
0.461538	0.417391	0.417391
0.548387	0.341463	0.341463
0.448276	0.460526	0.460526
0.609467	0.432432	0.432432
0.566265	0.622222	0.622222
0.494737	0.375	0.375
0.507463	0.537313	0.537313
0.5	0.630901	0.630901
0.487395	0.56383	0.56383
0.406015	0.476636	0.476636
0.461538	0.494815	0.494815
0.557143	0.422619	0.422619
0.455882	0.535749	0.535749
0.538462	0.476923	0.476923
0.473684	0.465364	0.465364
0.436364	0.483871	0.483871
0.442857	0.392157	0.392157
0.43299	0.716157	0.716157
0.371134	0.408163	0.408163
0.461538	0.432203	0.432203
0.454545	0.6875	0.6875
0.603604	0.506667	0.506667
0.46789	0.411983	0.411983
0.46875	0.545455	0.545455
0.555556	0.4	0.4
0.480769	0.527027	0.527027
0.526158	0.6625	0.6625
0.703125	0.619469	0.619469
0.455696	0.584951
0.686441	0.528926
0.5	0.519231
0.521277	0.461538
0.565611	0.512821
0.387755	0.669291
0.421941	0.472727
0.514286	0.469565
0.407767	0.5
0.432203	0.5
0.442308	0.575
0.521739	0.58
0.515528	0.448276
0.431034	0.421053
0.491525	0.528662
0.550296	0.42623
0.396552	0.522059
0.416	0.597561
0.487288	0.655556
0.475524	0.523364
0.507463	0.567568
0.524138	0.52381
0.49	0.431373
0.459677	0.472973
0.446043	0.53719
0.485065	0.605505
0.57047	0.552941
0.560886	0.54023
0.494845	0.547059
0.514793	0.453125
0.447761	0.449153
0.310345	0.505882
0.519481	0.529412
0.537234	0.403226
0.518519	0.543046
0.669291	0.570093
0.545455	0.713235
0.472727	0.607843
0.505263	0.518519
0.588785	0.489583
0.366667	0.536082
0.531915	0.419355
0.485075	0.439024
0.497041	0.390625
0.441667	0.6875
0.40458	0.540107
0.477876	0.433333
0.465753	0.482759
0.585799	0.603774
0.5	0.52
0.338462	0.5
0.333333	0.454545
0.47619	0.478049
0.504505	0.505495
0.462963	0.483871
0.5	0.527644
0.55625	0.436364
0.470588	0.315789
0.4	0.53886
0.553571	0.376812
0.5	0.382353
0.40625	0.622857
0.507246	0.322314
0.347826	0.387097
0.583333	0.413043
0.506579	0.477419
0.446809	0.365385
0.542373	0.433333
0.464789	0.377049
0.417722	0.553846
0.530612	0.571429
0.485507	0.458896
0.548077	0.589286
0.354839	0.512987
0.571848	0.430233
0.540881	0.470588
0.611765	0.560748
0.63913	0.421053
0.526316	0.5
0.552941	0.46281
0.381818	0.578947
0.541667	0.428571
0.428571	0.5
0.333333	0.563636
0.458333	0.5
0.378378	0.460317
0.6	0.470779
0.478873	0.42623
0.532787	0.48
0.481258	0.475
0.527778	0.547945
0.507353	0.516129
0.490385	0.457143
0.477477	0.566372
0.509434	0.56
0.590909	0.432432
0.563218	0.52
0.559524	0.8
0.506494	0.473684
0.538462	0.414286
0.508197	0.509434
0.47644	0.557047
0.424755	0.513812
0.425	0.409449
0.537217	0.527559
0.543353	0.5
0.486631	0.5
0.539394	0.541667
0.47191	0.537634
0.597222	0.421053
0.461538	0.61086
0.48227	0.380952
0.414286	0.391304
0.431373	0.52907
0.454545	0.623116
0.475	0.475728
0.378947	0.465753
0.467532	0.375
0.5125	0.381538
0.551724	0.415929
0.453333	0.496241
0.513043	0.441558
0.556701	0.475
0.58256	0.544304
0.477419	0.510204
0.444444	0.591304
0.423077	0.473684
0.404255	0.391892
0.516393	0.662722
0.547368	0.66055
0.555932	0.5
0.474576	0.535714
0.590909	0.361702
0.614458	0.559055
0.486486	0.493671
0.472527	0.452055
0.508772	0.4375
0.573964	0.459854
0.509091	0.421569
0.587097	0.653061
0.560606	0.44086
0.55814	0.553571
0.476015	0.5625
0.53481	0.485714
0.627027	0.697436
0.525424	0.402985
0.546875	0.525
0.496212	0.493506
0.502488	0.567797
0.5	0.473684
0.474227	0.589286
0.514706	0.523077
0.45082	0.51087
0.442786	0.516484
0.513889	0.648148
0.578947	0.521739
0.469565	0.487805
0.396552	0.584746
0.554404	0.453826
0.563319	0.5
0.539474	0.480447
0.556522	0.534884
0.475	0.378049
0.514286	0.442623
0.467532	0.45
0.380597	0.396104
0.466346	0.586207
0.489691	0.522727
0.642202	0.571429
0.487603	0.477064
0.423611	0.494737
0.324324	0.525
0.546392	0.48887
0.436047	0.546012
0.507246	0.574803
0.553114	0.569231
0.480769	0.534965
0.469274	0.615385
0.592593	0.723077
0.422222	0.537549
0.558621	0.573171
0.46087	0.621622
0.538462	0.625
0.372549	0.534759
0.483051	0.522388
0.352941	0.435484
0.617647	0.507463
0.411348	0.651934
0.53125	0.494949
0.483871	0.465753
0.556338	0.514706
0.449275	0.507692
0.482143	0.431034
0.526786	0.554217
0.464286	0.609375
0.348315	0.47541
0.421053	0.538462
0.419355	0.469697
0.631579	0.52907
0.354839	0.314815
0.424658	0.539326
0.487805	0.5
0.481481	0.551724
0.433735	0.459016
0.413793	0.511628
0.395349	0.44086
0.46281	0.545455
0.491525	0.473684
0.470588	0.418605
0.516129	0.5
0.405405	0.486486
0.586538	0.45
0.508375	0.557692
0.569832	0.426829
0.484615	0.482353
0.408163	0.557143
0.545455	0.450549
0.46114	0.488095
0.39645	0.53
0.432432	0.628866
0.55102	0.477273
0.437956	0.360656
0.530612	0.485086
0.38806	0.5
0.530612	0.41196
0.514286	0.5
0.392523	0.369048
0.485981	0.488372
0.447917	0.508671
0.501779	0.456311
0.555556	0.526316
0.516949	0.474227
0.418605	0.5
0.559322	0.494505
0.486842	0.5
0.484127	0.46875
0.5	0.52
0.480874	0.493506
0.551724	0.515152
0.48	0.617647
0.615385	0.500935
0.484211	0.443299
0.487179	0.640777
0.527027	0.567568
0.666667	0.586207
0.45	0.484375
0.436667	0.35
0.485149	0.491803
0.52381	0.424051
0.4375	0.392857
0.326087	0.567416
0.622951	0.477064
0.558824	0.463594
0.518797	0.465116
0.513158	0.49635
0.507919	0.481481
0.468085	0.488462
0.543269	0.490909
0.47191	0.578947
0.487395	0.428571
0.476744	0.593458
0.405405	0.459459
0.431579	0.505155
0.507042	0.5
0.475	0.429688
0.583333	0.473684
0.551181	0.496689
0.566434	0.430399
0.413462	0.289855
0.350649	0.5
0.560606	0.43038
0.395833	0.507143
0.430894	0.447917
0.592233	0.475806
0.578125	0.534091
0.54185	0.411765
0.487562	0.615385
0.598039	0.472727
0.473684	0.668712
0.531915	0.401125
0.413793	0.436364
0.553191	0.561224
0.488889	0.621908
0.404762	0.285714
0.391753	0.557143
0.388889	0.445946
0.480769	0.505882
0.519231	0.495238
0.446429	0.285714
0.428571	0.461538
0.446429	0.390244
0.410714	0.472727
0.423077	0.439024
0.428571	0.37931
0.464286	0.516
0.442308	0.517647
0.446429	0.5
0.457627	0.609342
0.397959	0.456693
0.392857	0.509434
0.378378	0.636364
0.428571	0.474747
0.682692	0.517857
0.442308	0.5625
0.434783	0.387097
0.454118	0.478992
0.561453	0.444444
0.483221	0.4
0.523077	0.52381
0.526316	0.688372
0.513514	0.581395
0.552083	0.566667
0.485075	0.435644
0.511628	0.465649
0.454023	0.512195
0.473684	0.421875
0.530435	0.603448
0.516129	0.46789
0.525	0.538462
0.559585	0.536765
0.621622	0.610795
0.507463	0.510638
0.370968	0.545455
0.5	0.5
0.5	0.4
0.416667	0.621495
0.413333	0.556213
0.460836	0.654088
0.345324	0.480769
0.389706	0.675
0.506173	0.705882
0.52795	0.578947
0.578947	0.669643
0.480315	0.478261
0.457447	0.584615
0.541353	0.58794
0.508929	0.625
0.535211	0.473684
0.5	0.528571
0.414894	0.505495
0.5	0.478723
0.514085	0.482051
0.484848	0.726027
0.46087	0.435484
0.508772	0.514286
0.459184	0.5
0.5	0.37963
0.410959	0.341463
0.520325	0.55102
0.411215	0.463918
0.416667	0.424242
0.510753	0.355932
0.469136	0.465517
0.526786	0.636364
0.54	0.466667
0.25	0.545455
0.456693	0.621053
0.434211	0.536585
0.407407	0.564935
0.543307	0.581818
0.48913	0.535714
0.585635	0.587156
0.493464	0.491803
0.5	0.458498
0.411765	0.55102
0.396552	0.608696
0.48	0.56701
0.459677	0.634483
0.450549	0.5625
0.387097	0.561798
0.492537	0.567696
0.520833	0.558758
0.5	0.511905
0.476923
0.385542
0.516129
0.566667
0.415254
0.437158
0.5
0.440932
0.525
0.525424
0.478469
0.483051
0.536486
0.447368
0.488372
0.525641
0.44186
0.484211
0.442623
0.435814
0.380952
0.545455
0.452174
0.536765
0.459677
0.536585
0.492063
0.367089
0.578231
0.49345
0.423841
0.394366
0.4375
0.549223
0.480663
0.492308
0.53125
0.4
0.433962
0.466102
0.526316
0.610811
0.54321
0.394495
0.375
0.381679
0.598039
0.571429
0.445428
0.388489
0.586957
0.436364
0.461538
0.436364
0.47191
0.487179
0.514706
0.470588
0.525
0.527638
0.352273
0.490196
0.550633
0.546851
0.512821
0.472
0.495146
0.423423
0.40625
0.505051
0.336842
0.472727
0.367816
0.358696
0.430464
0.405405
0.396552
0.378378
0.482353
0.356589
0.425
0.536364
0.365854
0.561905
0.4847
0.458824
0.425373
0.524862
0.486239
0.521277
0.437956
0.510204
0.462687
0.457143
0.390625
0.426752
0.585366
0.55
0.483333
0.426829
0.441176
0.647059
0.415385
0.45283
0.372881
0.409091
0.593074
0.562914
0.634146
0.6
0.58209
0.464567
0.414286
0.454545
0.482353
0.477778
0.455882
0.487179
0.45122
0.412589
0.494845
0.489796
0.527273
0.45283
0.45
0.447917
0.432836
0.636364
0.517241
0.404412
0.466667
0.465517
0.631579
0.537736
0.5
0.48951
0.491803
0.483871
0.482517
0.550459
0.5625
0.492308
0.506849
0.598901
0.565
0.37037
0.473684
0.525714
0.581081
0.534483
0.548913
0.575
0.5
0.529412
0.481481
0.425
0.359223
0.482353
0.574627
0.407895
0.5
0.466667
0.419643
0.44186
0.513158
0.515625
0.472527
0.575
0.456731
0.486239
0.463768
0.555556
0.519824
0.570248
0.540323
0.475177
0.59375
0.561644
0.488372
0.595745
0.455446
0.413043
0.526316
0.586466
0.493333
0.547945
0.555556
0.522059
0.530769
0.463768
0.525
0.557252
0.58
0.563536
0.626087
0.551948
0.414141
0.514286
0.414634
0.582278
0.531746
0.503817
0.448276
0.714286
0.506667
0.518519
0.468354
0.549618
0.482759
0.520833
0.557692
0.514286
0.480769
0.510204
0.464567
0.471074
0.453846
0.464567
0.535433
0.515464
0.42268
0.47
0.517241
0.484694
0.5
0.516129
0.455446
0.416399
0.583333
0.571429
0.517241
0.468085
0.516129
0.583691
0.481928
0.358491
0.398058
0.407895
0.494624
0.460674
0.578652
0.621622
0.467836
0.485714
0.428571
0.417582
0.509524
0.468354
0.411765
0.539326
0.596685
0.430233
0.613636
0.503546
0.508475
0.655462
0.564356
0.634615
0.496053
0.480583
0.441441
0.438596
0.607143
0.455531
0.396552
0.430556
0.459459
0.540698
0.52381
0.478261
0.397351
0.549327
0.462069
0.561983
0.462687
0.544715
0.53125
0.587629
0.626168
0.594872
0.531707
0.46875
0.486486
0.482353
0.625
0.492063
0.516279
0.607143
0.473684
0.547945
0.488189
0.56
0.421053
0.538462
0.619835
0.57037
0.500756
0.606383
0.5
0.534884
0.300752
0.442177
0.514851
0.574468
0.372093
0.394737
0.557692
0.575342
0.504348
0.363636
0.463768
0.440299
0.456522
0.457831
0.563218
0.528662
0.458716
0.478261
0.550459
0.445455
0.508021
0.513274
0.549296
0.469388
0.527027
0.481308
0.459184
0.449704
0.465517
0.439024
0.42623
0.546392
0.484375
0.568966
0.470588
0.6
0.519685
0.46087
0.553719
0.479215
0.5
0.526882
0.516129
0.426901
0.536
0.346939
0.469388
0.401163
0.498471
0.5
0.597015
0.434555
0.430262
0.529412
0.402597
0.344023
0.36157
0.453125
0.341176
0.62531
0.576923
0.537736
0.626506
0.494118
0.467532
0.54878
0.44
0.485714
0.468085
0.408602
0.313953
0.650224
0.50501
0.529412
0.479167
0.466102
0.525862
0.484127
0.482759
0.635294
0.598726
0.61039
0.442308
0.454545
0.450867
0.459016
0.56875
0.509905
0.717391
0.393701
0.553191
0.436782
0.392857
0.425287
0.467742
0.452632
0.473684
0.48
0.504902
0.574257
0.466793
0.633136
0.623596
0.533333
0.52381
0.51087
0.378378
0.360656
0.480315
0.553741
0.567308
0.559567
0.566474
0.692308
0.486667
0.51145
0.550562
0.46988
0.447368
0.45082
0.497006
0.521008
0.568182
0.505556
0.436364
0.538462
0.459259
0.645161
0.483871
0.551948
0.569149
0.619863
0.405172
0.5
0.507937
0.642857
0.481928
0.545455
0.568182
0.522059
0.477778
0.369565
0.545455
0.597561
0.539474
0.474576
0.535971
0.474227
0.447368
0.544944
0.461538
0.504505
0.506329
0.534653
0.496732
0.526316
0.439024
0.431818
0.313433
0.5625
0.415842
0.473684
0.488235
0.439024
0.48
0.517647
0.528926
0.533333
0.493671
0.538462
0.472727
0.48
0.452381
0.5
0.518519
0.539326
0.502242
0.45977
0.486957
0.430769
0.655556
0.613861
0.404959
0.435714
0.412698
0.530303
0.4
0.538462
0.474576
0.425287
0.492447
0.652174
0.538462
0.428571
0.621622
0.492188
0.558824
0.39645
0.555556
0.466019
0.461538
0.443478
0.46087
0.440252
0.472393
0.397661
0.560748
0.404255
0.446154
0.542683
0.497523
0.520958
0.513514
0.567568
0.46875
0.534884
0.357143
0.414634
0.494845
0.617143
0.57554
0.54386
0.5
0.568421
0.478992
0.525773
0.702381
0.582857
0.338983
0.526316
0.535135
0.521277
0.551282
0.461538
0.457143
0.453704
0.536145
0.457627
0.487952
0.475
0.490196
0.591549
0.636364
0.482143
0.440541
0.494118
0.411765
0.493671
0.557522
0.472727
0.574803
0.564103
0.4
0.455782
0.455556
0.456
0.463768
0.474747
0.493023
0.55814
0.480769
0.482143
0.518868
0.654362
0.654485
0.52381
0.423729
0.52322
0.426778
0.57732
0.461538
0.552632
0.415584
0.44186
0.539683
0.507634
0.489655
0.511364
0.480769
0.62069
0.6
0.517647
0.513158
0.5
0.589286
0.585227
0.50838
0.5
0.496894
0.578947
0.577778
0.512195
0.433735
0.557471
0.431373
0.375
0.518519
0.505882
0.559211
0.552795
0.478873
0.514925
0.486486
0.58042
0.575758
0.487805
0.512821
0.568
0.52
0.693878
0.502591
0.465517
0.513158
0.494845
0.568627
0.558333
0.548611
0.435897
0.532258
0.55814
0.582418
0.502857
0.525424
0.574627
0.471698
0.492063
0.615942
0.492895
0.48711
0.428571
0.433333
0.475309
0.468531
0.540541
0.425
0.431034
0.472973
0.550725
0.708738
0.522013
0.530435
0.391304
0.582231
0.544304
0.582609
0.557252
0.517442
0.495238
0.678571
0.584071
0.521053
0.594595
0.613636
0.639344
0.539474
0.494737
0.528846
0.438356
0.481481
0.681614
0.59375
0.588889
0.567073
0.654054
0.507576
0.439655
0.522388
0.595238
0.432432
0.597561
0.608247
0.460674
0.454545
0.518519
0.667442
0.508475
0.529605
0.459459
0.39441
0.5
0.435484
0.590551
0.625
0.487952
0.494118
0.5
0.609524
0.578947
0.53719
0.617486
0.636691
0.527778
0.517241
0.568421
0.562963
0.506494
0.441558
0.528
0.540323
0.494737
0.594203
0.433962
0.506667
0.586806
0.484375
0.53719
0.514286
0.436782
0.324675
0.446809
0.470588
0.464286
0.534884
0.459459
0.458015
0.519084
0.369231
0.410526
0.376147
0.416667
0.504348
0.537879
0.546838
0.585492
0.422535
0.498208
0.36
0.516667
0.565217
0.46281
0.38961
0.465909
0.5
0.395833
0.423529
0.435897
0.560976
0.552632
0.664474
0.394366
0.584416
0.61809
0.44898
0.492958
0.421053
0.617021
0.567398
0.544828
0.509434
0.533708
0.492908
0.50641
0.520833
0.443396
0.446352
0.417323
0.5
0.429825
0.491667
0.507463
0.496241
0.344828
0.513158
0.542169
0.484211
0.648276
0.585034
0.513761
0.605505
0.51087
0.443299
0.530864
0.25
0.333333
0.53125
0.582418
0.552941
0.460317
0.482353
0.473684
0.532872
0.5
0.521127
0.594771
0.489583
0.5
0.504348
0.5375
0.505405
0.491429
0.419355
0.473684
0.488095
0.541063
0.452862
0.41791
0.364486
0.457627
0.384615
0.413333
0.590909
0.647059
0.590909
0.504132
0.452055
0.537313
0.484193
0.473815
0.43
0.408602
0.425197
0.471154
0.403974
0.333333
0.364865
0.524272
0.54023
0.44186
0.515152
0.532258
0.575
0.602649
0.473684
0.486239
0.7
0.5
0.56
0.496552
0.60119
0.514286
0.5
0.509804
0.518519
0.464286
0.530201
0.423077
0.396825
0.504348
0.428571
0.49162
0.494505
0.484375
0.572464
0.415584
0.43299
0.612121
0.567164
0.547059
0.405172
0.563636
0.485714
0.52809
0.594595
0.385965
0.517241
0.448087
0.465517
0.5
0.431034
0.439024
0.5
0.493671
0.505495
0.414062
0.467532
0.509804
0.5
0.539394
0.534247
0.585859
0.64
0.520548
0.390805
0.528689
0.547771
0.424658
0.472727
0.425
0.553398
0.5
0.567797
0.46281
0.489933
0.423913
0.5625
0.591241
0.453125
0.623037
0.529851
0.47593
0.413043
0.677419
0.4125
0.573705
0.627586
0.58296
0.554945
0.342105
0.438776
0.465909
0.428571
0.391566
0.528846
0.513514
0.567797
0.555556
0.524324
0.487923
0.455696
0.475
0.468254
0.545455
0.53125
0.422078
0.314286
0.56
0.45679
0.411765
0.396947
0.449153
0.346283
0.505882
0.541176
0.541176
0.529412
0.505882
0.529412
0.541176
0.505882
0.529412
0.469697
0.590674
0.536913
0.525
0.521236
0.576087
0.47561
0.509091
0.533981
0.456446
0.522936
0.474227
0.613333
0.456693
0.403226
0.543046
0.552239
0.422078
0.529412
0.401961
0.473019
0.382979
0.507692
0.573864
0.469697
0.505495
0.492537
0.438356
0.475
0.539823
0.461538
0.5
0.442623
0.570093
0.435294
0.463235
0.515695
0.513636
0.59
0.452991
0.439252
0.507246
0.477064
0.482759
0.490909
0.548315
0.595855
0.576471
0.511111
0.462185
0.495575
0.538462
0.5
0.460674
0.455026
0.520661
0.444444
0.606383
0.713235
0.523077
0.357895
0.607843
0.504587
0.513514
0.387097
0.52
0.571429
0.5
0.477273
0.474359
0.53125
0.652778
0.433333
0.548077
0.5
0.504425
0.383929
0.390244
0.541176
0.530806
0.5
0.54
0.433735
0.588235
0.492754
0.492857
0.455882
0.429752
0.508475
0.507042
0.514019
0.518519
0.507289
0.573333
0.528662
0.503185
0.411043
0.543103
0.528694
0.493392
0.375
0.580952
0.6
0.4375
0.507937
0.654135
0.626984
0.490066
0.489583
0.406977
0.485577
0.460829
0.575269
0.380952
[truncated: 16,486 more rows]

## Sheet: summary
	A3	A5	RI	SE
ctrl	0.5617	0.486	0.3933	0.4984
ACs	0.5405	0.4877	0.391	0.504
ATCs	0.5591	0.4911	0.3864	0.5028
AOCs	0.5287	0.4855	0.3978	0.506
tDASGs	0.42293	0.5058	0.3947	0.513
oDASGs	0.4571	0.5035	0.3356	0.5091
