# Supplementary material for: Comprehensive Transcriptome Analysis Reveals Sex-Specific Alternative Splicing Events in Zebrafish Gonads
Source: Life (Basel). 2022 Sep 16;12(9):1441. doi: 10.3390/life12091441 (PMC9501657; doi:10.3390/life12091441)
Supplement: Supplementary file 1 [file life-12-01441-s001.zip › Table S7.xlsx]

## Sheet: SE
ctrl	ACs	ATCs	AOCs	tDASGs	oDASGs
2.1038	1.74819	1.74819	2.91593	1.39794	2.02938
1.94448	2.08279	2.08279	2.08279	2.1038	1.79239
2.24304	2.29226	2.29226	1.716	1.6902	1.80618
1.95424	1.88649	1.88649	1.81291	2.47567	1.78533
2.15836	3.07298	3.07298	1.59106	1.94939	2
2.17319	2.22789	2.22789	2.1038	1.80618	2.20412
1.95424	1.53148	1.53148	1.74036	3.3298	1.86332
2.08279	3.21854	3.21854	2.0607	1.93952	2.25768
2.32015	2.07188	2.07188	1	2.02938	2.1038
1.90849	2.77887	2.77887	2.11394	1.86332	1.89763
2.20683	3.63879	3.63879	1.90309	1.91381	2.07188
2.01703	1.27875	1.27875	2	1.6902	1.44716
2.63749	1.44716	1.44716	1.76343	2.02531	1.11394
2.29226	2.02938	2.02938	1.27875	1.6721	1.91381
2.04139	1.39794	1.39794	2.1959	2.53275	2.25768
2.04532	3.14706	3.14706	1.78533	1.96379	1.76343
2.07555	2.1038	2.1038	2.13354	2.1038	1.98677
1.78533	1.73239	1.73239	1.91381	1.716	1.83251
1.90849	1.92942	1.92942	1.95424	1.5682	1.90849
2.04922	2.02938	2.02938	2.02938	1.89763	1.88649
1.44716	2.70586	2.70586	1.5682	1.4624	1.98677
1.20412	3.07737	3.07737	2.02119	1.34242	1.5682
1.63347	2.1271	2.1271	1.70757	1.34242	1.63347
1	1.88649	1.88649	1.86923	1.50515	2.13672
1.89209	2.24304	2.24304	2.08279	1.92942	1.89763
2.08636	1.6902	1.6902	2.03743	1.73239	1.94448
2.16137	1.77815	1.77815	1.92942	1.34242	2.13354
1.82607	2.47567	2.47567	1.93952	1.66276
2.91593	1.98677	1.98677	2.23045	1.34242
1.97772	0.477121	0.477121	2.10721	1.74036
2.19866	2.02119	2.02119	2.07188	1.86332
1.63347	1.80618	1.80618	1.92942	2.1959
1.89763	2.10721	2.10721	1.92942	2.08636
1.98227	1.92942	1.92942	1.79239	1.82607
2.26482	1.81954	1.81954	2.17898	1.27875
1.95904	1.74036	1.74036	2.33041	1.53148
2.23553	1.90849	1.90849	2.13354	1.80618
1.34242	1.64345	1.64345	1.70757	1.80618
1.53148	1.88649	1.88649	1.90849	1.82607
2.60853	1.92942	1.92942	2.2833	1.86332
1.79239	1.94939	1.94939	2.2878	1.53148
2.1038	1.716	1.716	1.79239	1.5682
2.15229	1.60206	1.60206	1.61278	2
2.02531	2.07555	2.07555	1.80618	2.34242
2.20683	1.92428	1.92428	1.20412	2.14301
1.66276	1.80618	1.80618	2.27184	1.96379
1.99123	1.60206	1.60206	1.77815	2.02531
2.25768	1.78533	1.78533	1.76343	1.63347
2.03743	2.12385	2.12385	2.42325	1.69897
2.03743	2.13033	2.13033	2.24304	1.6902
1.6902	1.64345	1.64345	1.83251	1.94448
2.38021	1.69897	1.69897	1.94448	1.8451
1.74036	1.76343	1.76343	2.31175	1.81954
2.08279	2.10037	2.10037	1.95904	1.6902
1.9345	1.86332	1.86332	1.96848	1.6902
2.0607	2.17609	2.17609	2.92012	1.39794
2.0607	1.80618	1.80618	1.74036	1.34242
2.0607	1.80618	1.80618	1.57978	3.56608
1.34242	1.97772	1.97772	2.28556	1.94448
2.11059	3.3298	3.3298	1.83885	1.88649
2.12385	1	1	1.53148	1.27875
2.0569	1.20412	1.20412	2.24304	1.80618
2.00432	2.233	2.233	2.08279	1.716
1.50515	2.13354	2.13354	1.79239	1.53148
1.70757	1.93952	1.93952	1.66276	1.8451
1.96379	2.02938	2.02938	2.19033	1.82607
2.39445	1.96848	1.96848	1.716	1.11394
2.67943	2.83059	2.83059	2.07918	1.78533
2.20683	2.28556	2.28556	1.78533	1.59106
1.94448	1.86332	1.86332	2.11394	2.79588
2.11727	3.83588	3.83588	0.845098	2.77887
2.17898	2.07555	2.07555	3.21219	1.87506
2.24304	1.91381	1.91381	2.04922	1.77085
1.57978	2.01284	2.01284	2.18752	2.65418
2.31387	2.07555	2.07555	1.9345	2.94002
2.08279	2.29003	2.29003	2.13354	1.88649
2.03743	2.11727	2.11727	2.02938	1.90849
1.8451	2.83948	2.83948	1.27875	1.63347
1.86332	3.59583	3.59583	1.34242	3.31006
2.02119	1.89763	1.89763	2.08279	1.81291
1.82607	1.76343	1.76343	2.27875	3.52866
2.08991	1.86332	1.86332	2.18752
1.95904	1.63347	1.63347	1.76343
1.66276	1.50515	1.50515	1.74036
2.46687	1.34242	1.34242	2.21484
2.0086	1.716	1.716	2.10037
2.12385	1.6902	1.6902	2.48855
2.09691	2.02531	2.02531	1.78533
1.88081	1.92942	1.92942	2
1.86923	1.96848	1.96848	2.20412
1.65321	1.80618	1.80618	1.86332
2.0569	2.03342	2.03342	2.09342
1.63347	3.04454	3.04454	1.54407
2.30963	3.09096	3.09096	2.35411
2.04532	2.95376	2.95376	1.39794
2.13033	2.47422	2.47422	1.5682
1.74036	1.63347	1.63347	1.39794
1.97772	2.15229	2.15229	1
1.87506	2.02938	2.02938	1.27875
1.96848	1.6721	1.6721	1.8451
2.01284	1.76343	1.76343	2.02531
1.73239	1.91381	1.91381	2.17319
1.99123	2.00432	2.00432	2.25768
2.02119	2.07918	2.07918	2.1038
1.68124	2.11727	2.11727	2.1038
2.08279	1.53148	1.53148	1
2.40824	2.17319	2.17319	1.44716
1.9345	2.94349	2.94349	1.98227
1.99123	2.11727	2.11727	1.96848
2.16732	2.53275	2.53275	1.88081
1.97313	1.20412	1.20412	2.34439
1.73239	1.96379	1.96379	2.02119
2.40993	2.14613	2.14613	1.66276
2.04922	2.49136	2.49136	2.23553
1.98677	2.1038	2.1038	2.29885
1.97313	1.97313	1.97313	2.01284
2.30963	1.53148	1.53148	1.86332
1.86332	1.34242	1.34242	2.49415
1.716	1.95904	1.95904	2.51188
1.88081	1.716	1.716	2.05308
1.716	1.76343	1.76343	2.12385
2.13033	2.79309	2.79309	1.88649
1.9345	2.45179	2.45179	1.90309
2.01284	1.89209	1.89209	1.89763
2.19033	2.19312	2.19312	1.6902
2.00432	2.09342	2.09342	2.0607
2.15534	1.95904	1.95904	1.27875
2.14301	1.74819	1.74819	2.17026
2.29667	1.91381	1.91381	2.22789
1.6902	1.716	1.716	2.03743
1.89209	1.5682	1.5682	1.69897
1.77085	1.11394	1.11394	1.44716
2.1271	1.89763	1.89763	1.6721
1.79239	1.78533	1.78533	2.1038
1.92942	2.26717	2.26717	1.89763
2.10721	1.86332	1.86332	1.86332
1.61278	1.63347	1.63347	1.20412
1.66276	2.08636	2.08636	2.13672
1.74036	1.53148	1.53148	2.0086
1.77815	1.4624	1.4624	1.6902
1.73239	1.49136	1.49136	1.96848
2.2014	1.98677	1.98677	1.74819
2.25042	2.03743	2.03743	1.98227
1.88649	1.34242	1.34242	1.8451
2.26951	2.02531	2.02531	2.76716
2.01703	2.1038	2.1038	1.82607
1.53148	1.34242	1.34242	1.60206
2.02938	2.16137	2.16137	1.88649
1.86332	1.78533	1.78533	2.07188
1.43136	1.88081	1.88081	1.27875
2.4456	1.9345	1.9345	2.04922
2.51188	2.93551	2.93551	2.11394
2.38202	1.17609	1.17609	1.96379
1.83251	1.50515	1.50515	1.95904
2.16137	2.23553	2.23553	1.73239
1.88081	2.77159	2.77159	1.66276
2.16137	2.34044	2.34044	1.91381
2.14613	1.94448	1.94448	2.07188
2.37107	1.77815	1.77815	2.57864
1.5563	1.87506	1.87506	1.44716
2.1038	1.8451	1.8451	2.55388
1.80618	2.01284	2.01284	1.9345
1.99123	1.92428	1.92428	1.91381
1.97313	1.30103	1.30103	1.78533
1.74819	1.57978	1.57978	1.60206
2.0569	1.94448	1.94448	2.18752
2.13033	1.92942	1.92942	1.4624
2.26717	1.51851	1.51851	1.64345
2.23553	1.79239	1.79239	1.44716
2.24304	2.08279	2.08279	2.03743
1.91381	2.18469	2.18469	1.97772
2.21748	2.21219	2.21219	1.60206
2.17898	1.34242	1.34242	3.06744
2.0086	1.53148	1.53148	2.21219
2.11059	1.77815	1.77815	2.1038
1.62325	1.60206	1.60206	2.11394
2.85248	2.3032	2.3032	2.45637
2.11394	3.16167	3.16167	1.11394
2.3483	2.1271	2.1271	2.11394
2.2014	2.3032	2.3032	2.40312
2.55388	1.86332	1.86332	1.91381
2.17609	2.1038	2.1038	1.5682
1.54407	1.98677	1.98677	1.60206
2.33041	1.50515	1.50515	2.27184
2.25042	1.73239	1.73239	1.82607
2.08991	1.5682	1.5682	1.79239
2.04532	1.34242	1.34242	1.82607
1.94939	1.66276	1.66276	2.25768
1	1.34242	1.34242	2.29667
2.24551	2.15534	2.15534	1.86332
2	1.53148	1.53148	1.83251
1.78533	2.21748	2.21748	2.11394
3.22246	2.04532	2.04532	1.76343
1.76343	1.44716	1.44716	1.91908
2.02531	1	1	2.40824
1.89209	1.74036	1.74036	1.78533
1.83251	2.80821	2.80821	2.01703
1.8451	1.6902	1.6902	1.81954
2.06446	1.44716	1.44716	2.23553
1.80618	1.41497	1.41497	2.20952
1.63347	1.86332	1.86332	1.94939
1.98227	1.44716	1.44716	1
1.72428	1.44716	1.44716	1.76343
1.94448	1.63347	1.63347	1.78533
1.68124	1.80618	1.80618	1.63347
1.92428	1.39794	1.39794	1.96848
2.18469	2.16732	2.16732	1.64345
2.15229	1.79934	1.79934	1.27875
2.04139	2.20412	2.20412	1.63347
2.77379	2.51322	2.51322	2.15229
1.75587	2.46687	2.46687	2.17026
2.79379	1.97313	1.97313	1.77815
2.05308	1.94448	1.94448	1.716
2.08991	1.87506	1.87506	1.91381
1.74036	1.63347	1.63347	1.92942
1.97313	1.66276	1.66276	1.8451
1.95904	2.1959	2.1959	1.95904
3.76005	1.96379	1.96379	1.92428
1.88649	1.43136	1.43136	2
3.54728	2.06446	2.06446	1.98677
2.61066	2.08636	2.08636	1.94448
1.91381	2.00432	2.00432	1.78533
2.01703	1.6721	1.6721	2.80414
1.77085	1	1	1.83251
2.06819	2.14301	2.14301	2.47857
2.08636	2.17026	2.17026	1.20412
2.04922	1.11394	1.11394	1.92428
2.11059	1.34242	1.34242	1.9345
2.32222	1.82607	1.82607	2.23805
1.99123	1.63347	1.63347	2.01284
1.95904	1.99123	1.99123	1.27875
2.1038	1.66276	1.66276	1.98677
2.13354	1.63347	1.63347	2.15229
1.93952	1.60206	1.60206	1.95904
2	1.72428	1.72428	1.90309
2.28556	1.27875	1.27875	2.10721
2.36549	2.95856	2.95856	1.39794
2	2.935	2.935	1.88649
2.233	1.53148	1.53148	2.12057
2.40483	2.07188	2.07188	1.53148
2.05308	2.33244	2.33244	2.72835
1.74819	1.60206	1.60206	1.98677
2.03743	2.20683	2.20683	2.01284
1.5682	1.76343	1.76343	1.5682
2.02938	1.92942	1.92942	1.76343
2.17026	1.98677	1.98677	1.80618
1.70757	2.04139	2.04139	1.30103
1.59106	1.53148	1.53148	1.78533
2.10721	2.69636	2.69636	2.19866
1.53148	2.22789	2.22789	1.44716
1.66276	1.34242	1.34242	2.25042
1.88081	1.5682	1.5682	2.03743
2.15229	1.49136	1.49136	3.33646
1.81291	1.89763	1.89763	1.63347
2.24551	2.13033	2.13033	2.13672
1.68124	1.4624	1.4624	2.13033
1.9345	2.0607	2.0607	2.716
2.07555	1.88649	1.88649	1.74036
2.08279	1.6902	1.6902	1.27875
2.17898	1.91381	1.91381	1.6902
1.83885	2.21484	2.21484	2.33041
1.86332	2.20952	2.20952	2.04532
1.5563	2.18752	2.18752	1.98677
2.43457	1.94448	1.94448	1.88081
2.7332	2.20683	2.20683	2.10721
3.08171	2.00432	2.00432	2.12385
1.96379	1.80618	1.80618	2.17898
1.63347	2.23045	2.23045	3.29092
1.97313	2.06446	2.06446	1.83885
1.86332	1.60206	1.60206	1.50515
1.94448	1.8451	1.8451	1.89763
1.91381	1.91381	1.91381	2.14613
2.03743	3.75059	3.75059	1.98227
2.35411	1.63347	1.63347	2.09342
1.5682	2.12057	2.12057	1.94448
3.1089	2.7767	2.7767	1.53148
1.78533	1.60206	1.60206	1.11394
2.13672	1.80618	1.80618	1.74036
1.716	1.82607	1.82607	2.21219
2.9619	1.86332	1.86332	3.09482
2.07555	1.6902	1.6902	1.74036
1.89763	1.53148	1.53148	1.99123
2.15534	2.13033	2.13033	2.45179
2.14613	2.15836	2.15836	0.845098
1.91381	1.8451	1.8451	1.8451
2.29003	1.92942	1.92942	1.86923
2.25527	1.5682	1.5682	2.40654
2.26717	3.18355	3.18355	2.32222
2.23805	1.76343	1.76343	0.845098
1.65321	1.78533	1.78533	1.11394
2.11059	1.716	1.716	1.91381
2.02119	1.69897	1.69897	1.74036
1.74819	2	2	1.61278
1.6721	1.27875	1.27875	1.76343
1.70757	2.04532	2.04532	2.39794
2.30103	1.11394	1.11394	1.92942
2.15229	2.03743	2.03743	2.12057
2.0607	1.91381	1.91381	2.67302
2.04139	2.34242	2.34242	2.1038
1.98677	1.63347	1.63347	2.02531
2.01284	1.716	1.716	1.94448
1.94448	2.14301	2.14301	2.29667
1.86332	1.6902	1.6902	2.04922
2.25042	1.96379	1.96379	2.04922
1.5682	1.5682	1.5682	1.49136
2.08991	1.81954	1.81954	2.07555
1.9345	1.92942	1.92942	0.954243
1.92428	2.02531	2.02531	1.97772
2.233	1.78533	1.78533	1.32222
2.15534	2.6721	2.6721	2.63347
2.31597	1.94448	1.94448	1.63347
1.80618	1.78533	1.78533	1.47712
2	1.4624	1.4624	2.00432
2.13672	2.09342	2.09342	2.11727
1.78533	1.99123	1.99123	2.08991
2.07188	2.36736	2.36736	1.80618
2.04139	1.95424	1.95424	1.76343
2.17898	2.6464	2.6464	2.03743
2.30535	1.73239	1.73239	1.716
1.80618	1.63347	1.63347	2.13354
1.96848	2.36736	2.36736	2.54654
2.15229	2.08279	2.08279	1.97313
1.97772	2.11394	2.11394	1.34242
2.04139	1.90849	1.90849	1.44716
1.66276	1.91381	1.91381	1.39794
1.83885	1.95904	1.95904	2.33041
2.13033	1.97313	1.97313	2.22789
1.77085	2.17319	2.17319	2.2014
2.14301	1.69897	1.69897	1.716
1.99564	1.97313	1.97313	2.20412
1.73239	2.0607	2.0607	2.13354
1.86923	1.6902	1.6902	1.88081
2.23045	1.60206	1.60206	2.04922
2	1.94448	1.94448	1.83885
2.11394	2.06446	2.06446	2.11394
2.08279	1.6902	1.6902	2.29885
2.00432	1.94448	1.94448	1.38021
2.06819	1.98677	1.98677	1.88081
1.92942	1.8451	1.8451	1.8451
2.0086	2.10721	2.10721	2.26007
1.78533	1.81954	1.81954	1.97313
1.9345	1.96848	1.96848	2.29003
1.88081	1.91381	1.91381	1.86332
1.6902	1.49136	1.49136	1.79239
2.26245	1.6902	1.6902	1.8451
1.91381	3.08884	3.08884	1.20412
2	1.97772	1.97772	2.03342
2.20952	1.44716	1.44716	1.61278
2.12057	1.79239	1.79239	1.6902
2.23553	2.12057	2.12057	1.98677
2.31806	2.13988	2.13988	1.51851
2.0607	2.34044	2.34044	1.77085
1.65321	2.01284	2.01284	1.76343
1.88649	1.36173	1.36173	1.94448
2.00432	2.75128	2.75128	1.17609
2.14301	2.88423	2.88423	1.94448
2.05308	1.6902	1.6902	1.97772
2.16732	1.90849	1.90849	2.08991
2.00432	1.95904	1.95904	2.18752
1.5563	1.85733	1.85733	1.74036
1.97772	1.39794	1.39794	1.74819
2.38739	1.34242	1.34242	2.03743
2.0086	1.716	1.716	1.78533
1.82607	2.10037	2.10037	2.40312
1.70757	2.07188	2.07188	1.6902
2.31597	2.83759	2.83759	1.66276
2.75891	1.65321	1.65321	1.98677
1.68124	1.53148	1.53148	2.16137
2.16137	1.66276	1.66276	1.20412
1.53148	1.92942	1.92942	2.25042
2.13354	2.55023	2.55023	2.62428
3.80713	1.54407	1.54407	2.65418
3.10789	2.12385	2.12385	2.4014
1.86923	3.56608	3.56608
1.65321	3.06521	3.06521
1.64345	1.88081	1.88081
2	2.70757	2.70757
1.39794	2	2
2.25285	1.6902	1.6902
1.81291	1.90849	1.90849
2.29226	2.09342	2.09342
2.31806	1.76343	1.76343
2.16137	1.94448	1.94448
1.83885	2.31175	2.31175
1.79934	2.23805	2.23805
1.91908	2.33646	2.33646
2.15229	1.88081	1.88081
1.11394	1.87506	1.87506
2.18752	2.09342	2.09342
1.88649	1.60206	1.60206
1.68124	1.88649	1.88649
2.15836	1.5682	1.5682
2.14613	1.95904	1.95904
2.26951	1.44716	1.44716
1.20412	2.26482	2.26482
2.55388	2.19312	2.19312
1.98227	1.27875	1.27875
2.24304	1.80618	1.80618
1.74819	2.31175	2.31175
2.17609	2.1959	2.1959
1.88081	1.97313	1.97313
2.20412	1.91908	1.91908
2.04532	1.53148	1.53148
1.83885	1.54407	1.54407
1.79934	2.01284	2.01284
2.31387	1.54407	1.54407
2.1038	1.716	1.716
2.19866	1.65321	1.65321
1.716	2.32838	2.32838
1.97313	2.22272	2.22272
1.78533	1.53148	1.53148
2	2.0569	2.0569
2.04139	1.97772	1.97772
2.26717	2.02119	2.02119
2.37475	1.8451	1.8451
1.76343	1.44716	1.44716
1	1.82607	1.82607
2.08279	2.07188	2.07188
2.02119	1.63347	1.63347
2.62325	1.98677	1.98677
1.98677	2	2
1.9345	1.86332	1.86332
1.63347	1.86332	1.86332
2.06819	1.86332	1.86332
2.12057	2.1038	2.1038
2.05308	2.716	2.716
2.08636	2.63246	2.63246
2.21219	1.53148	1.53148
2.04139	1.96848	1.96848
2.10037	1.78533	1.78533
1.53148	0.845098	0.845098
2.29885	1.82607	1.82607
1.98677	1.86332	1.86332
2.92788	1.74036	1.74036
1.6902	1.92942	1.92942
2.12057	1.60206	1.60206
2.1271	1.11394	1.11394
1.91908	1.34242	1.34242
1.98227	2.65128	2.65128
1.34242	2.22011	2.22011
1.63347	1.65321	1.65321
2.16732	1.60206	1.60206
2.4014	2.01284	2.01284
2.2833	2.32428	2.32428
1.85126	2.02938	2.02938
1.90309	2.18752	2.18752
2.02938	1.63347	1.63347
2.40483	1.78533	1.78533
2.16137	1.5563	1.5563
1.91381	2.11394	2.11394
1.85733	2.01284	2.01284
2.1271	2.13988	2.13988
1.92942	1.77085	1.77085
1.91908	1.39794	1.39794
2.09342	1.82607	1.82607
2.233	1.716	1.716
2.23805	1.6902	1.6902
2.14613	1.91381	1.91381
2.20683	1.78533	1.78533
1.92942	2.01703	2.01703
1.94939	1.8451	1.8451
1.78533	2.02119	2.02119
1.97772	1.98677	1.98677
1.63347	4.20906	4.20906
2.19866	1.63347	1.63347
2.20412	1.86923	1.86923
2.22011	2.11059	2.11059
1.8451	1.80618	1.80618
1.90309	1.92428	1.92428
2.23553	2.26482	2.26482
2.09342	1.59106	1.59106
1.66276	2.20412	2.20412
2.11727	2.79588	2.79588
2.02119	1.9345	1.9345
1.89763	1.96379	1.96379
2.08279	1.96379	1.96379
1.5682	1.91381	1.91381
1.86923	1.83251	1.83251
2.13033	1.65321	1.65321
2.02531	1.6721	1.6721
2.02119	2.27184	2.27184
2.14301	1.8451	1.8451
2.12385	2.42325	2.42325
1.76343	2.88762	2.88762
2.17319	2.0569	2.0569
1.75587	2.25285	2.25285
2.13672	1.99564	1.99564
2.02531	1.9345	1.9345
2.21219	2.01284	2.01284
2	1.82607	1.82607
1.44716	2.14301	2.14301
1.74819	1.20412	1.20412
2.93752	1.53148	1.53148
1.88081	1.6902	1.6902
2.42813	1.92942	1.92942
2.21219	1.97313	1.97313
2.4609	1.97313	1.97313
1.78533	2.77887	2.77887
2.83759	2.07188	2.07188
2.58206	1.6902	1.6902
2.62428	1.78533	1.78533
3.07298	2.08279	2.08279
1.82607	1.87506	1.87506
2.29226	2.29226	2.29226
2.72181	1.87506	1.87506
2.02531	1.80618	1.80618
2.45332	2.03743	2.03743
1.89763	1.77085	1.77085
1.88081	1.49136	1.49136
2.02119	1.27875	1.27875
1	1.8451	1.8451
1.27875	1.74036	1.74036
1.97313	1.94448	1.94448
1.89763	2.65418	2.65418
1.94448	2.06446	2.06446
2.25042	2.88138	2.88138
1.63347	2.94002	2.94002
2.07188	1.88649	1.88649
1.95904	2.23553	2.23553
2.25768	2.38739	2.38739
1.99123	2.17026	2.17026
1.99564	2.24797	2.24797
2.10721	2.76418	2.76418
1.60206	1.44716	1.44716
1.99123	1.59106	1.59106
1.63347	1.50515	1.50515
2.23553	1.66276	1.66276
1.62325	2.07188	2.07188
2.13988	1.78533	1.78533
2.23553	1.86332	1.86332
2.08636	1.98227	1.98227
2.15229	1.80618	1.80618
2.80618	1.54407	1.54407
2.29003	2.18184	2.18184
2.00432	1.80618	1.80618
2.40824	1.60206	1.60206
1.81291	1.80618	1.80618
1.59106	1.53148	1.53148
1.89763	1.11394	1.11394
1.89209	1.74036	1.74036
2.13354	1.74036	1.74036
1.61278	3.15625	3.15625
2.3483	1.78533	1.78533
1.95904	2.22011	2.22011
1.92428	2.11727	2.11727
2.07188	1.90849	1.90849
2.23553	1.49136	1.49136
2.25768	2.96942	2.96942
2.22789	2.0607	2.0607
1.98677	2.09342	2.09342
2.02531	1.60206	1.60206
1.76343	1.63347	1.63347
2.01703	2.49276	2.49276
2.19033	1.76343	1.76343
1.716	2.0607	2.0607
1.49136	1.61278	1.61278
1.4624	1.88081	1.88081
2.22789	1.5682	1.5682
1.91908	1.65321	1.65321
1.97772	1.60206	1.60206
1.82607	1.82607	1.82607
1.80618	2.36736	2.36736
2.07555	1.97313	1.97313
2.12385	2.02938	2.02938
1.81291	3.13033	3.13033
2.14613	2.22531	2.22531
2.13354	3.00903	3.00903
2.36922	1.81291	1.81291
2.0569	3.05154	3.05154
1.74036	1.79239	1.79239
1.8451	1.70757	1.70757
1.98677	2.35984	2.35984
1.98677	1.6902	1.6902
1.716	2.07188	2.07188
1.74036	1.80618	1.80618
2.04532	1.87506	1.87506
2.03743	3.57657	3.57657
1.98227	1.34242	1.34242
1.5563	1.39794	1.39794
2.01703	2.5682	2.5682
3.22089	1.90309	1.90309
1.80618	2.05308	2.05308
1.89763	2.91593
2.07188	2.08279
1.96379	1.716
1.97313	1.81291
2.34439	1.59106
1.6902	2.1038
2.97681	1.74036
2.14613	2.0607
2.01284	1
2.07188	2.11394
1.716	1.90309
2.0607	2
2.20683	1.76343
2.06446	1.27875
2.07188	2.1959
2.22789	1.78533
1.76343	2.13354
2.09691	1.91381
2.37291	1.95424
2.15534	2.02938
1.82607	1.5682
2.16137	2.02119
2	1.70757
2.09342	1.86923
2.14301	2.08279
3.18752	2.03743
2.47422	1.92942
2.43297	1.93952
1.98677	2.23045
2.22789	2.10721
1.82607	2.07188
1.76343	1.92942
1.88649	1.92942
2.27416	1.79239
2.38561	2.17898
2.1038	2.33041
1.51851	2.13354
1.74036	1.70757
1.97772	1.90849
2.02938	2.2833
1.77815	2.2878
1.6721	1.79239
2.1271	1.61278
2.22789	1.80618
2.07918	1.20412
2.11727	2.27184
2.05308	1.77815
1.86332	1.76343
2.22789	2.42325
1.34242	2.24304
1.81291	1.83251
1.83885	1.94448
2.16732	2.31175
2.04532	1.95904
2.03342	1.96848
1.9345	2.92012
2.20412	1.74036
1.53148	1.57978
1.60206	2.28556
2.04922	1.83885
1.97313	1.53148
1.50515	2.24304
2.13988	2.08279
1.36173	1.79239
2.07918	1.66276
2.48287	2.19033
2.14922	1.716
2.24797	2.07918
1.85126	1.78533
1.89763	2.11394
2.16732	0.845098
2.13988	3.21219
2.31806	2.04922
1.49136	2.18752
2.53275	1.9345
2.2014	2.13354
1.92942	2.02938
2.36173	1.27875
2.233	1.34242
1.92942	2.08279
1.74036	2.27875
2.22531	2.18752
1.44716	1.76343
1.73239	1.74036
2.07918	2.21484
2.04532	2.10037
1.81291	2.48855
2.15229	1.78533
2.38739	2
3.21854	2.20412
1.85733	1.86332
2.13354	2.09342
2.01703	1.54407
2.04532	2.35411
2.02531	1.39794
1.64345	1.5682
1.93952	1.39794
2.22531	1
1.88649	1.27875
1.81291	1.8451
1.78533	2.02531
2.28103	2.17319
3.2634	2.25768
1.90309	2.1038
2.48996	2.1038
2.23805	1
2.27184	1.44716
2.21748	1.98227
1.94939	1.96848
1.85733	1.88081
1.89209	2.34439
2.14922	2.02119
1.8451	1.66276
1.70757	2.23553
1.81954	2.29885
1.60206	2.01284
1.97772	1.86332
1.88649	2.49415
1.90309	2.51188
2.16137	2.05308
1.87506	2.12385
2.0607	1.88649
1.98677	1.90309
2.73159	1.89763
2.19033	1.6902
1.99564	2.0607
2.19312	1.27875
1.97313	2.17026
2.08636	2.22789
1.97772	2.03743
2.46982	1.69897
2.07188	1.44716
1.94448	1.6721
1.91908	2.1038
1.86923	1.89763
1.95904	1.86332
1.75587	1.20412
2.22789	2.13672
1.74036	2.0086
2.19033	1.6902
2.12057	1.96848
2.11059	1.74819
2.43297	1.98227
2.49969	1.8451
2.26717	2.76716
2.07188	1.82607
1.80618	1.60206
3.53555	1.88649
2.3032	2.07188
1.57978	1.27875
1.98677	2.04922
1.83251	2.11394
2.08636	1.96379
2.3032	1.95904
1.85733	1.73239
2.233	1.66276
2.0607	1.91381
1.76343	2.07188
2.28556	2.57864
2.35984	1.44716
2.18184	2.55388
2.0607	1.9345
2.07918	1.91381
2.49831	1.78533
1.88649	1.60206
2.1271	2.18752
2.31806	1.4624
2.2878	1.64345
2.03743	1.44716
2.08279	2.03743
2.15836	1.97772
1.5682	1.60206
1.98677	3.06744
2.23553	2.21219
1.83885	2.1038
2.43616	2.11394
2.31806	2.45637
2.25285	1.11394
1.90849	2.11394
1.65321	2.40312
2.4624	1.91381
2.0607	1.5682
2.22789	1.60206
2.18469	2.27184
2.07188	1.82607
1.83251	1.79239
1.83251	1.82607
2.14922	2.25768
1.98227	2.29667
1.79239	1.86332
2.15229	1.83251
1.83885	2.11394
2.04922	1.76343
2.04922	1.91908
2.22531	2.40824
1.94939	1.78533
1.97772	2.01703
1.79239	1.81954
1.97772	2.23553
1.49136	2.20952
1.86332	1.94939
1.91381	1
1.73239	1.76343
1.91908	1.78533
2.24055	1.63347
1.63347	1.96848
2.08279	1.64345
2.07188	1.27875
2.13354	1.63347
1.79239	2.15229
1.5682	2.17026
2.01703	1.77815
3.077	1.716
2.25285	1.91381
2.11394	1.92942
1.6902	1.8451
2.40312	1.95904
2.28556	1.92428
2.22789	2
2.17026	1.98677
1.6902	1.94448
2.13672	1.78533
1.6902	2.80414
2.1271	1.83251
1.6902	2.47857
2.02119	1.20412
2.02938	1.92428
2.02938	1.9345
1.98227	2.23805
2.44871	2.01284
1.90849	1.27875
2.07188	1.98677
1.9345	2.15229
2.07188	1.95904
1.88081	1.90309
2.10037	2.10721
2.0086	1.39794
2.26245	1.88649
1.93952	2.12057
1.39794	1.53148
1.11394	2.72835
1.97772	1.98677
1.59106	2.01284
1.86923	1.5682
1.25527	1.76343
2.14613	1.80618
2.77815	1.30103
2.00432	1.78533
1.92428	2.19866
1.80618	1.44716
1.66276	2.25042
2.08636	2.03743
2.0086	3.33646
2.12385	1.63347
1.88081	2.13672
2.94645	2.13033
1.97313	2.716
2.31806	1.74036
1.94939	1.27875
2.07555	1.6902
1.9345	2.33041
1.5682	2.04532
1.97772	1.98677
2.15229	1.88081
2.07918	2.10721
1.85733	2.12385
2.1038	2.17898
2.15534	3.29092
2.01703	1.83885
1.88649	1.50515
1.81954	1.89763
2.15836	2.14613
2.08991	1.98227
2.01284	2.09342
2.40824	1.94448
2.35603	1.53148
2.3032	1.11394
2.70757	1.74036
1.88081	2.21219
1.6721	3.09482
1.93952	1.74036
1.6721	1.99123
1.95424	2.45179
1.62325	0.845098
1.98677	1.8451
1.25527	1.86923
1.716	2.40654
1.716	2.32222
1.74819	0.845098
1.74819	1.11394
1.74819	1.91381
1.74819	1.74036
1.716	1.61278
1.74819	1.76343
1.74819	2.39794
1.716	1.92942
1.74819	2.12057
1.77085	2.67302
1.99123	2.1038
2.04922	2.02531
1.5682	1.94448
1.6902	2.29667
2.01703	2.04922
1.716	2.04922
1.96379	1.49136
2.62839	2.07555
2.55388	0.954243
2.17319	1.97772
2.29003	1.32222
2.12385	2.63347
1.5682	1.63347
2.2833	1.47712
2.1271	2.00432
1.63347	2.11727
2.24055	2.08991
1.57978	1.80618
2.0607	1.76343
1.79239	2.03743
2.07918	1.716
2.28556	2.13354
1.5682	2.54654
1.82607	1.97313
1.79239	1.34242
1.94448	1.44716
2	1.39794
1.92428	2.33041
1.87506	2.22789
2.88423	2.2014
2.14301	1.716
2.13354	2.20412
1.90849	2.13354
2.20683	1.88081
1.27875	2.04922
2.1038	1.83885
1.97313	2.11394
2.12385	2.29885
2.35025	1.38021
2.15229	1.88081
2.04139	1.8451
1.97313	2.26007
1.99123	1.97313
2.15229	2.29003
2.12057	1.86332
2.0607	1.79239
1.75587	1.8451
1.99123	1.20412
2.13354	2.03342
1.86332	1.61278
2.08991	1.6902
2.02938	1.98677
1.98227	1.51851
2.26951	1.77085
1.90849	1.76343
2.04922	1.94448
2	1.17609
1.20412	1.94448
2.1038	1.97772
1.88081	2.08991
2.13033	2.18752
2.1038	1.74036
1.96379	1.74819
2.25768	2.03743
2.48572	1.78533
2.12057	2.40312
1.53148	1.6902
1.76343	1.66276
2.17609	1.98677
2.09342	2.16137
2.26007	1.20412
1.49136	2.25042
2.1271	2.62428
1.98227	2.65418
2.2878	2.4014
2.11394
1.91908
2.09342
1.95424
2.07188
2.26245
2.11394
2.77887
1.60206
2.07188
2.32015
2.07188
2.86923
1.88081
1.9345
2.19312
1.63347
1.97772
1.78533
2.96708
1.79934
1.51851
2.36173
2.13354
2.09342
2.08991
1.79934
1.89763
2.16732
2.35984
2.17898
2.15229
1.80618
2.28556
2.25768
2.11394
1.80618
1.39794
2.02531
2.07188
1.88081
2.26717
1.90849
2.03743
2.15836
2.11727
2.0086
1.8451
2.5302
2.14301
1.66276
1.74036
1.95904
1.74036
1.94939
2.06819
2.13354
1.83251
2.07918
2.29885
1.94448
2.0086
2.19866
2.81358
1.89209
2.09691
2.01284
2.04532
2.20412
2.29667
1.97772
2.04139
1.93952
1.96379
2.17898
2.04532
2.06446
2.04532
1.92942
2.11059
2.07918
2.04139
1.61278
2.02119
2.91222
1.92942
2.1271
2.25768
2.03743
1.97313
2.13672
1.6902
2.1271
1.54407
1.80618
2.1959
2.21484
2.14613
1.77815
1.91381
1.83251
1.53148
2.11394
1.72428
1.77085
1.64345
2.36361
2.17898
1.91381
1
1.82607
2.1038
1.8451
1.64345
1.92942
1.95424
1.83251
1.89209
1.91381
3.63879
1.98677
1.99123
2.04139
2.2014
1.90309
1.98227
1.82607
1.34242
1.4624
2.13354
2.02119
2.06446
1.88081
2.02531
1.94448
2.15534
1.78533
2.09342
2.15534
2.33846
1.90309
2.29003
1.86332
2.26007
2.30103
1.90849
2.18184
2.24304
1.86923
1.76343
2.26482
2.44716
1.20412
2.18469
2.87852
1.90309
2.01284
1.92942
2.1271
1.88081
2
2.07918
2.04922
1.9345
1.88081
1.80618
1.95904
1.90309
2.31806
2.03743
1.83885
2.13033
2.35603
2.08279
2.09342
2.14922
1.80618
1.86332
1.63347
1.97313
2.00432
1.66276
1.27875
2.12385
2.17609
1.86332
2.15836
2.13354
2.11394
2.13988
1.60206
2.11727
2
2.25768
2.36173
2.18752
1.99564
2.02119
1.61278
2.19866
2.10037
2.11727
1.76343
0.845098
1.87506
2.03342
1.89763
2.11727
1.76343
1.98227
2.01703
2.02119
2.01703
1.6902
2.1038
2.08279
2.11394
2.1038
2.1038
1.98677
1.98677
2
1.76343
2.29226
1.91381
1.49136
2.00432
3.99896
1.38021
0.845098
1.76343
1.97313
2.33646
2.36736
1.91908
1.72428
2.01284
1.88081
1.96848
1.94939
2.55145
2.04532
2.233
2.02119
2.10037
1.95904
2.62325
1.89763
1.53148
1.94939
2.25768
1.9345
1.94448
2.14922
2.07188
2.07555
2.00432
1.716
3.21669
2.31387
2.04532
1.75587
1.44716
2.6637
2.24055
1.85733
1.5682
2.23553
2.10037
1.96379
2.17898
2.64933
2.16137
2.08279
1.82607
2.08991
1.80618
1.98677
2.02938
2.29003
2.31175
1.80618
1.86923
1.92942
1.98227
1.79934
2.33244
2.04922
1.27875
1.86332
2.1038
2
1.27875
2.19312
2.08279
2.13033
2.8202
1.97313
1.81954
1.9345
2.12385
2.16732
2.00432
2.45025
2.11059
1.57978
2.19312
1.86332
2.0607
1.64345
1.83885
2.1271
1.96379
1.91908
1.93952
2.1959
2.03743
1.66276
2.03743
2.04139
2.27184
2.35411
1.85126
1.99123
2.17026
2.33041
2.29226
2.22789
1.76343
1.61278
1.78533
1.98677
1.80618
1.76343
1.53148
1.95424
2.1038
2.0607
2.08279
2.93752
1.60206
1.96848
2.26951
2.233
2.09691
1.6902
1.99123
2.23553
2.51455
1.88081
2.42813
2.58206
3.07298
2.13354
1.88649
2.53529
2.68485
1.80618
1.92942
2.60531
2.19312
2.02531
2.22011
1.92942
2.18752
1.91381
1.39794
2.02119
2.14922
1.96848
1.9345
2.3483
2.6981
1.70757
1.98227
2.07188
2.06446
2.10037
1.76343
1.92942
2.1959
2.18752
1.716
1.74036
2.23805
1.78533
2.20412
3.06483
1.66276
2.1038
1.6721
1.93952
1.74819
1.93952
1.79239
1.97772
1.88081
2.17609
2.30963
2.00432
2.72181
2.22789
2.25042
1.77815
1.79934
1.96379
1.5682
1.78533
2.1038
2.86629
2.01703
2.44248
2.23805
1.11394
2.17609
2.11727
1.94939
2.52114
1.57978
2.08636
2.22272
2.07555
2.4216
2.25527
1.74036
2.41497
2.60746
1.79239
1.79239
2.18752
2.27416
2.46538
2.06446
1.716
2.10037
1.62325
1.91908
1.34242
1.64345
2.13354
2.25527
1.66276
1.94448
1.91381
2.18184
1.77085
2.44404
1.98677
1.88081
2.25042
1.95904
2.04532
1.89763
2.00432
2.18469
2.45484
1.91381
1.64345
1.82607
1.90309
2.00432
1.27875
2.23045
2.08991
1.39794
1.92942
2.08279
1.87506
1.89763
1.89209
1.74036
2
1.62325
1.92428
2.13033
1.94939
2.3483
1.93952
2.0607
1.81291
1.95424
2.00432
2.08279
2.14613
1.79934
1.81954
1.8451
1.95904
2.07188
1.93952
2.51983
1.83885
2.11394
1.44716
1.5682
2.10721
2.13354
2.52892
2.18469
2.01284
1.89209
2.0607
2.0607
2.2014
2.21219
2.233
2.02938
1.6721
2.11394
2.51587
3.15014
2.22272
1.5682
1.5682
1.80618
1.63347
1.92428
1.91381
1.98677
2.24304
2.14301
2.0569
1.20412
1.97772
2.07555
1.98677
2.22531
2.24304
1.77085
1.88081
2.26717
1.97313
2.36922
2.36922
2.02119
2.03342
2.22011
2.07188
2.22011
2.07918
2.18469
2.15229
1.99564
2.04922
2.5682
1.92942
1.92942
1.89763
2.05308
2.04139
2.70586
1.89209
1.39794
2.16732
1.95424
2.09691
1.83885
1.99564
2.33244
2.11059
2.01703
2.04922
2.02531
2.47422
2.47857
2.02119
1.77085
2.5092
3.07737
1.98677
1.95904
1.88081
2.73159
2.11059
2.27646
2.89542
2.16137
1.94448
2.19312
2.16137
1.92942
1.92942
1.88081
1.85733
2.22531
2.24551
2.25285
2.16435
2.68395
2.18184
1.95424
2.08991
1.91908
2.24055
1.70757
1.60206
2.13033
1.92942
2.18184
2.20683
1.85126
2.1271
2.04532
2.15534
1.51851
1.91381
2.06819
2.09691
1.39794
1.6902
2.28556
1.76343
1.88081
1.98677
2.18469
2.07918
2.15836
1.89209
1.79239
1.63347
1.95904
2.24304
2.07188
2.1271
2.02531
1.79934
2.13988
3.12613
3.1685
1.54407
1.47712
2.20952
2.15534
2.17026
1.60206
1.76343
1.86923
1.83885
2.01284
2.2014
2.0607
2.0607
2.72346
1.89763
2.0607
2.11727
2.23553
2.02119
2.04922
2.05308
2.27875
1.86923
1.64345
1.78533
1.88081
1.97772
2.01703
1.86332
2.38561
2.3483
1.50515
1.95424
2.21484
2.26717
2.12057
2.06446
2.3032
1.92428
1.5682
2.51587
1.98677
1.94939
1.94448
2.27646
2.9345
1.77085
2.48287
2.17026
2.50786
1.97313
1.79239
2.1038
2.18184
2.22011
2.23045
2.03342
2.32222
2.0569
2.08279
2.26245
2.44404
2.15836
1.76343
1.97772
2.13033
1.88649
1.88649
2.09691
2.09342
1.97772
1.83885
1.72428
2.17609
2.45939
1.80618
2.08279
2.24304
1.93952
1.88649
1.6721
1.53148
1.44716
1.63347
1.5682
2.11727
2.11727
1.81291
1.97772
2.03743
2.03342
2.0607
2.12057
2.93146
2.28556
1.85126
2.92273
1.39794
1.77815
1.83885
2.08279
1.88649
2.24551
2.31806
1.98227
1.92942
1.59106
1.91381
1.88081
2.18184
1.85126
2.18752
2.29885
1.99123
1.85126
1.88081
1.6721
2.50379
2.16137
2.02531
2.25042
2.45025
2.19312
1.98227
2.02531
2.36736
2.1038
1.34242
2.0569
2.07918
1.82607
2.12385
1.4624
1.88081
1.91908
1.97772
2.16137
2.16732
2.03743
2.03743
2.26482
1.98677
1.90849
0.60206
0.477121
1.98227
1.95904
1.92942
2.10037
1.92942
1.57978
2.4609
1.44716
1.85126
2.18469
1.98227
2.22531
2.0607
2.38021
2.5682
2.24304
2.09342
1.75587
2.22531
2.31597
2.77379
2.1271
2.02938
2.07188
1.81291
1.87506
2.34242
1.53148
1.81954
2.08279
1.86332
2.1271
2.77887
2.60314
2.30103
1.96848
2.1038
2.01703
2.17898
1.47712
1.86923
2.01284
1.93952
1.9345
1.99564
2.09342
1.90309
2.17898
2.12385
2.03743
1
2.04922
1.87506
2.16137
2.22531
1.8451
1.81954
1.70757
1.73239
2.04922
2.47422
1.716
1.79934
2.0607
2.02119
2.25285
2.26007
1.80618
2.13988
1.88649
1.98677
2.21748
2.1271
2.23045
2.06446
2.34242
1.8451
1.94939
1.5682
1.75587
1.76343
2.26245
1.76343
2.02531
1.76343
1.91381
1.94448
1.89763
1.95904
2.10721
1.88649
2.0086
1.66276
2.21748
1.86332
1.99564
1.69897
1.86332
1.93952
2.38739
2.1959
1.86332
1.74036
1.60206
2.31387
2.18184
2.07188
2.08279
2.17319
2.26482
1.68124
2.13672
2.10721
2.88309
2.1271
2.96095
1.66276
1.49136
1.90309
2.7007
2.16137
2.3483
2.26007
1.57978
1.99123
1.94448
2.12385
2.22011
2.31806
1.5682
2.07188
1.65321
2.26717
2.31597
1.89763
2.30103
2.10037
2.12057
2.20412
2.18752
1.8451
1.39794
1.90849
1.70757
2.11727
2.07188
3.31911
1.92942
1.92942
1.92942
1.92942
1.92942
1.92942
1.92942
1.92942
1.92942
1.81954
2.28556
2.17319
2.20412
2.4133
2.26482
1.91381
1.74036
2.01284
3.15685
2.03743
1.98677
2.17609
2.1038
1.79239
2.17898
1.82607
2.18752
1.92942
2.0086
3.07408
1.97313
2.29003
2.24551
1.81954
1.95904
2.67117
1.86332
1.60206
2.05308
1.89209
1.41497
2.08636
2.33041
1.92942
2.13354
2.3483
2.34242
2.30103
2.06819
2.02938
2.13988
2.03743
1.76343
2.04139
2.64836
2.28556
1.92942
2.13033
2.37658
2.35411
1.11394
1
1.94939
2.27646
2.08279
2.03342
2.27416
2.13354
2.11394
1.97772
1.70757
2.03743
1.5682
1.79239
2.17609
1.44716
2.07188
1.64345
1.89209
1.80618
1.85733
1.77815
2.01703
2.15229
2.05308
2.04922
1.91381
1.92942
2.32428
1.81954
2
1.91908
1.53148
1.83885
2.14613
2.13354
2.08279
2.24797
2.15229
2.02938
1.43136
2.83632
1.87506
2.1959
2.1959
2.21219
2.06446
3.21431
2.35603
1.60206
2.02119
1.92942
1.68124
2.10037
2.12385
2.10037
2.17898
2.2833
1.9345
2.31806
2.33646
2.26951
1.79934
[truncated: 16,486 more rows]

## Sheet: A3
ctrl	ACs	ATCs	AOCs	tDASGs	oDASGs
0.60206	1.51851	1.51851	2.96942	3.1959	2.67486
0.60206	1.39794	1.39794	1.43136		0.60206
0.60206	1.5682	1.5682	1.44716		0.90309
0.60206	1.11394	1.11394	2.04922		3.57623
2.96942	0.845098	0.845098	2.13988		1
1.97313	0.845098	0.845098	0.60206		1.34242
1.64345	1	1	0.845098
0.60206	1	1	2.67486
0.60206	0.60206	0.60206	1.27875
0.60206	1.34242	1.34242	0.60206
0.60206	0.60206	0.60206	1.8451
0.60206	0.69897	0.69897	0.60206
0.778151	0.60206	0.60206	0.60206
1.20412	2.79518	2.79518	0.60206
0.60206	1.20412	1.20412	0.60206
1.65321	1.49136	1.49136	3.08422
1.62325	1	1	1.20412
0.60206	3.1959	3.1959	1.11394
0.60206	0.845098	0.845098	0.60206
0.60206	1.11394	1.11394	3.1959
0.60206	0.60206	0.60206	1.07918
0.60206	0.90309	0.90309	0.60206
0.60206	0.60206	0.60206	1.04139
0.60206	1.4624	1.4624	0.90309
1.39794	0.60206	0.60206	3.57623
0.60206	0.845098	0.845098	1
1.78533	2.15229	2.15229	1.88649
1.86332	1.49136	1.49136	1.27875
1.72428	2.86688	2.86688	1.11394
1.6721	0.60206	0.60206	0.60206
1.6721	2.14613	2.14613	1.20412
0.60206	1.49136	1.49136	1.80618
0.60206	0.60206	0.60206	1.78533
1.11394	0.69897	0.69897	0.60206
0.60206	0.60206	0.60206	2.01284
1.34242	0.845098	0.845098	0.845098
1.68124	1.20412	1.20412	0.60206
0.60206	1.78533	1.78533	1.27875
0.60206	0.60206	0.60206	1.34242
0.60206	1.49136	1.49136	0.60206
0.60206	1.49136	1.49136	0.60206
0.60206	0.60206	0.60206	0.60206
0.60206	0.60206	0.60206	1.30103
0.60206	1.49136	1.49136	1.27875
0.60206	1.76343	1.76343	0.60206
0.60206	0.60206	0.60206	1.53148
1.25527	0.60206	0.60206	0.845098
0.60206	0.60206	0.60206	1
0.60206	0.60206	0.60206	2.16732
1.49136	0.60206	0.60206	0.60206
0.60206	1	1	1.83885
1.11394	0.60206	0.60206	1.85733
0.60206	0.60206	0.60206	0.60206
0.60206	1.11394	1.11394	0.60206
0.60206	1.11394	1.11394	0.60206
0.60206	1.07918	1.07918	1.53148
0.69897	1.49136	1.49136	0.60206
0.60206	1.88081	1.88081	2.4014
0.60206	1	1	0.60206
0.60206	0.60206	0.60206	0.60206
0.60206	1.04139	1.04139	1.66276
1.20412	1.34242	1.34242	0.60206
0.60206	0.60206	0.60206	3.90369
1.95904	0.60206	0.60206	1
0.60206	0.60206	0.60206	0.90309
0.60206	0.60206	0.60206	1.04139
0.60206	0.60206	0.60206	1.36173
0.60206	0.60206	0.60206	3.43521
0.60206	1	1	1.49136
0.60206	1.49136	1.49136	1.34242
1	0.60206	0.60206	0.845098
0.60206	0.845098	0.845098	2.96567
1.34242	0.60206	0.60206	1.76343
1.20412	0.60206	0.60206	0.60206
1	1	1	0.60206
0.60206	2.96942		2.33646
1.38021	1.43136		0.845098
0.60206	1.44716		0.60206
0.60206	2.04922		1.53148
0.60206	2.13988		1.716
1.88649	0.60206		0.60206
1.51851	0.845098		1.76343
1.25527	2.67486		2.20683
0.60206	1.27875		1.85733
0.60206	0.60206		1.99123
0.60206	1.8451		1.34242
0.60206	0.60206		0.60206
0.60206	0.60206		0.60206
0.60206	0.60206		1.20412
0.60206	0.60206		1.11394
0.60206	3.08422		0.60206
1	1.20412		0.60206
1.39794	1.11394		1.44716
0.60206	0.60206		0.845098
1.716	3.1959		1.78533
1.74036	1.07918		1.04139
0.60206	0.60206		0.60206
1.47712	1.04139		0.60206
0.60206	0.90309		0.60206
0.60206	3.57623		0.60206
0.60206	1		1.78533
1.17609	1.88649		1.36173
0.60206	1.27875		1.8451
0.60206	1.11394		3.27875
2.25285	0.60206		1.39794
1.54407	1.20412		0.60206
0.60206	1.80618		1.53148
2.07188	1.78533		1.04139
0.60206	0.60206		0.60206
0.60206	2.01284		1.60206
0.778151	0.845098		0.60206
1.64345	0.60206		1.20412
0.60206	1.27875		0.60206
1.17609	1.34242		1
1	0.60206		1.74036
0.60206	0.60206		0.60206
1.43136	0.60206		0.60206
0.60206	1.30103		0.845098
0.60206	1.27875
0.60206	0.60206
0.60206	1.53148
1.25527	0.845098
2.62428	1
1.11394	2.16732
0.60206	0.60206
1.53148	1.83885
1.49136	1.85733
1.5682	0.60206
0.845098	0.60206
1.11394	0.60206
1.95424	1.53148
0.60206	0.60206
1.23045	2.4014
0.60206	0.60206
1.11394	0.60206
0.60206	1.66276
1.20412	0.60206
0.60206	3.90369
0.60206	1
1.20412	0.90309
0.60206	1.04139
1.44716	1.36173
0.60206	3.43521
2.04922	1.49136
0.60206	1.34242
0.60206	0.845098
1.11394	2.96567
1	1.76343
0.60206	0.60206
0.60206	0.60206
1.75587	2.33646
0.60206	0.845098
0.60206	0.60206
1.34242	1.53148
0.60206	1.716
2.13988	0.60206
0.60206	1.76343
0.60206	2.20683
2.88252	1.85733
1.91908	1.99123
0.60206	1.34242
0.60206	0.60206
0.60206	0.60206
0.60206	1.20412
1.44716	1.11394
1.39794	0.60206
1.75587	0.60206
1.51851	1.44716
1.27875	0.845098
0.60206	1.78533
2.38917	1.04139
0.60206	0.60206
0.845098	0.60206
0.60206	0.60206
0.60206	0.60206
1	1.78533
0.60206	1.36173
1.27875	1.8451
1.5563	3.27875
1.25527	1.39794
2.72181	0.60206
0.60206	1.53148
0.60206	1.04139
2.69984	0.60206
1.89763	1.60206
1.5682	0.60206
1.34242	1.20412
0.60206	0.60206
0.60206	1
0.60206	1.74036
0.845098	0.60206
1.11394	0.60206
1.34242	0.845098
3.37162
1.20412
1.07918
2.67486
0.60206
0.60206
1.25527
1.36173
0.778151
1.11394
0.60206
0.60206
0.60206
0.60206
1.34242
0.845098
1
0.60206
1.53148
0.60206
0.60206
1.82607
1
0.778151
1.716
0.60206
1.27875
1
0.60206
0.60206
0.60206
1.49136
0.60206
0.60206
1.27875
0.60206
0.60206
0.60206
1.44716
0.60206
0.60206
0.60206
0.60206
1.41497
0.60206
0.60206
0.60206
0.60206
0.60206
0.60206
0.778151
0.60206
0.60206
0.60206
0.60206
1.11394
1.11394
0.60206
0.60206
0.60206
1.27875
0.60206
0.60206
0.60206
0.60206
0.60206
0.60206
0.60206
1.34242
1.20412
0.845098
0.845098
0.60206
1.8451
0.60206
0.778151
0.60206
1.44716
0.60206
1.6902
1.20412
1.11394
1.91381
0.60206
2.03743
1.63347
0.60206
0.60206
0.60206
0.60206
0.60206
0.60206
0.60206
0.60206
0.60206
0.60206
1.07918
0.60206
1.54407
1.11394
1.27875
0.60206
0.477121
2.28103
0.60206
2.11394
1
1.11394
0.845098
0.60206
0.69897
1.49136
0.60206
0.60206
1.78533
0.60206
2.12385
0.60206
0.60206
1.74036
1.76343
0.60206
1.27875
2.19866
0.60206
0.60206
1.20412
2.79518
1.78533
1.716
0.60206
1.39794
0.778151
0.60206
1.77815
0.60206
1.43136
1.34242
1.81291
1.20412
0.60206
0.60206
0.60206
0.60206
1.27875
0.60206
0.60206
1.23045
0.60206
0.845098
1.11394
0.845098
0.69897
0.60206
0.60206
3.5738
0.60206
0.60206
3.08422
0.60206
0.60206
0.60206
0.60206
0.60206
0.60206
0.60206
0.778151
0.60206
0.60206
0.845098
0.60206
0.60206
1.49136
1.20412
0.60206
0.60206
1.11394
0.60206
1.77815
1.49136
0.60206
0.60206
1.61278
0.60206
1.44716
0.60206
0.60206
1
1.20412
0.69897
0.845098
0.60206
2.73878
1.4624
1.74036
0.60206
0.60206
1.53148
0.60206
1.82607
0.60206
0.60206
1.53148
1.07918
0.60206
0.69897
0.60206
0.60206
1.04139
0.60206
1.86332
0.60206
0.60206
0.60206
1.716
0.60206
0.60206
1.27875
1.97772
0.60206
0.845098
1.23045
0.60206
0.60206
1.32222
0.778151
0.845098
1.27875
1.11394
0.60206
0.60206
0.60206
0.954243
0.60206
0.60206
0.60206
1.78533
0.60206
0.60206
1.51851
1.47712
1.66276
0.60206
0.69897
0.845098
1.61278
1.76343
1.20412
1.44716
1.63347
1.39794
0.60206
0.60206
0.60206
0.778151
0.60206
1.25527
1.94448
0.845098
0.60206
0.60206
1.50515
0.60206
0.60206
1.82607
0.60206
0.90309
3.57623
1.34242
1.44716
0.845098
0.60206
1.98677
0.60206
1.20412
0.60206
0.60206
0.60206
1.49136
1
0.60206
0.60206
0.60206
1.91908
0.60206
1.88649
3.22789
0.60206
1.27875
1.5682
1.716
1.92942
1.53148
0.60206
0.60206
0.60206
1.44716
0.845098
0.60206
0.60206
0.60206
1.5682
0.845098
0.845098
0.60206
1.63347
0.60206
0.60206
0.60206
0.60206
0.778151
1.11394
1.20412
0.60206
1.11394
1.5682
0.845098
0.60206
0.60206
1.39794
1.39794
0.60206
1.80618
0.60206
0.60206
0.60206
0.60206
0.60206
0.60206
0.60206
1.20412
0.60206
0.60206
0.60206
0.69897
1.53148
1.20412
1.53148
0.60206
1.27875
2.63144
0.60206
1.80618
1.78533
0.60206
2.0086
0.60206
1.4624
0.60206
0.60206
1.44716
0.60206
0.60206
0.60206
1.11394
0.845098
0.60206
0.60206
0.60206
0.60206
0.60206
0.60206
0.60206
0.60206
0.60206
1.39794
0.60206
0.60206
0.845098
2.01284
0.60206
0.60206
1.5682
0.60206
0.845098
0.60206
0.60206
1.90309
0.60206
0.60206
0.60206
0.60206
0.845098
0.60206
0.60206
0.60206
0.60206
0.60206
0.60206
0.60206
0.60206
1.39794
0.778151
0.845098
2.15229
0.60206
1.34242
1.64345
0.60206
0.60206
1.716
1.49136
1.53148
0.60206
0.60206
1.20412
0.60206
0.60206
0.60206
0.60206
0.60206
0.60206
0.60206
1.79934
0.60206
1.53148
0.60206
1
1.83885
1.77815
2.86688
0.69897
1.81954
0.60206
0.845098
1.5682
0.60206
0.60206
0.60206
1.17609
0.60206
0.60206
0.60206
0.60206
0.60206
1.32222
0.60206
0.60206
1.59106
0.60206
0.60206
0.60206
1.80618
0.60206
0.60206
0.60206
0.60206
0.60206
1.27875
1.34242
0.60206
0.69897
0.60206
0.60206
0.60206
0.60206
0.778151
0.60206
1.47712
2.23553
0.60206
0.60206
1.20412
0.60206
2.39445
1.20412
1.27875
0.60206
0.60206
0.60206
0.60206
3.21219
0.60206
0.60206
0.60206
0.60206
0.60206
2.14613
0.60206
1.34242
0.60206
2.45484
0.60206
0.60206
0.60206
1.49136
0.60206
0.60206
0.60206
0.60206
0.60206
0.60206
1.30103
1.27875
1.78533
1.44716
0.60206
1.39794
1.53148
1.82607
0.69897
1.25527
1.32222
0.60206
1.49136
1.20412
0.60206
0.60206
0.60206
1.20412
0.60206
1.32222
1.25527
2.02938
0.60206
0.60206
0.69897
0.60206
2.74429
0.778151
0.954243
1.78533
0.60206
0.60206
0.60206
2.02531
1.77815
0.60206
0.60206
0.60206
0.60206
1.53148
0.60206
0.60206
1.74819
0.60206
0.60206
0.845098
0.60206
1.23045
0.60206
0.60206
0.845098
1.34242
0.60206
0.60206
0.60206
0.60206
0.60206
0.60206
0.60206
0.60206
1.65321
1.66276
1.53148
0.60206
1.716
0.60206
0.60206
1
1.44716
0.60206
1.63347
0.60206
1.32222
0.60206
0.60206
0.60206
0.60206
1.8451
1.11394
2.69636
0.60206
0.60206
0.60206
0.60206
2.16732
0.60206
1.36173
1.36173
1.5563
0.60206
0.60206
0.60206
1.6902
2.27646
0.60206
0.845098
0.60206
1.54407
0.69897
0.60206
1.20412
0.60206
1.49136
1.5563
0.60206
0.60206
1.14613
1.34242
0.954243
1.27875
0.60206
0.60206
0.60206
1.32222
0.60206
0.60206
0.60206
1
1.85126
2.00432
1.83885
1.85733
0.60206
1.72428
1.69897
1.94448
0.60206
0.778151
0.60206
1.34242
0.60206
0.60206
0.60206
1.20412
0.845098
1.32222
0.60206
0.60206
1.70757
1.85126
1.20412
0.69897
0.60206
1.78533
0.60206
0.60206
1.27875
1.53148
0.60206
1.20412
1.20412
0.60206
0.60206
1.34242
0.60206
0.60206
1.27875
1.92942
0.60206
1.63347
0.60206
1.53148
0.60206
1.49136
0.60206
0.60206
0.60206
0.60206
1.20412
0.60206
2.54407
0.60206
1.49136
0.60206
0.60206
1.65321
1.11394
0.60206
0.60206
1.66276
0.60206
0.60206
1.20412
1.27875
0.60206
2.37291
0.60206
0.60206
0.845098
0.60206
0.60206
1.53148
0.60206
0.60206
0.60206
0.60206
2.4014
1.5563
1.07918
0.60206
1.20412
0.60206
0.60206
0.60206
0.60206
0.60206
1.34242
0.60206
1.78533
0.60206
0.60206
0.60206
0.60206
1.44716
1.716
1.39794
0.60206
0.60206
0.60206
0.60206
1.20412
1.44716
0.60206
0.60206
0.60206
0.60206
2.76567
1.20412
1.17609
0.60206
0.60206
1.66276
1.8451
1.27875
1.17609
0.69897
1.92942
1.94448
0.60206
1.20412
1.53148
0.60206
0.60206
0.60206
0.60206
1
0.60206
0.60206
1.44716
0.60206
1.49136
0.60206
0.60206
1
1.27875
0.60206
0.60206
0.845098
0.60206
0.60206
0.60206
0.60206
1.30103
0.60206
0.60206
0.60206
3.90369
0.60206
1.20412
0.778151
0.60206
0.60206
0.60206
0.60206
1.20412
0.60206
0.60206
0.60206
1.76343
0.60206
1.51851
1.47712
1.34242
0.90309
1.04139
0.60206
1.27875
1.11394
0.60206
0.60206
1.66276
0.845098
1.39794
1
0.778151
0.60206
0.60206
1.34242
1.80618
0.60206
1
0.60206
1.11394
0.60206
0.60206
0.60206
0.60206
0.60206
0.60206
0.60206
1
1.63347
1.20412
1.11394
2.1959
0.60206
0.60206
1.95904
0.60206
0.60206
1.49136
0.845098
0.60206
1.97313
0.60206
1.14613
1.20412
0.60206
0.845098
0.60206
1.716
1.36173
1
1.716
1.74036
0.60206
1.49136
0.60206
0.60206
2.44248
0.60206
0.60206
3.43521
2.61805
0.60206
0.60206
1.49136
1.44716
2.84757
1.20412
0.60206
1.74036
1.20412
1.20412
1.49136
1.60206
1
0.845098
1.34242
0.60206
0.60206
0.60206
0.845098
1.5563
0.954243
0.60206
2.0086
0.60206
0.60206
0.60206
0.60206
0.845098
0.60206
2.95134
1.39794
1.66276
0.60206
0.60206
1.34242
1.54407
1.73239
1.30103
0.60206
1.14613
0.60206
0.60206
0.60206
1.66276
0.60206
1.53148
0.60206
1.11394
0.60206
0.60206
0.845098
0.60206
0.60206
0.60206
1.60206
0.60206
2.96567
1.76343
0.60206
0.60206
0.60206
0.60206
0.60206
0.60206
1.27875
0.60206
0.60206
0.60206
0.60206
0.60206
0.60206
0.60206
1.44716
0.60206
0.60206
0.845098
1.49136
1.66276
1.83885
1.17609
1.60206
0.60206
0.60206
1.5682
0.60206
1.41497
2.33646
1.74819
0.778151
2.1038
0.60206
0.778151
1.63347
0.845098
0.60206
0.60206
1.27875
1.11394
1.69897
0.60206
0.60206
0.60206
0.60206
1.94448
1.53148
0.778151
2.35793
2.47422
0.60206
1.34242
0.60206
0.60206
1.53148
1.716
1.27875
0.60206
0.60206
0.60206
1.27875
0.60206
0.60206
0.60206
0.60206
0.69897
1.74036
0.60206
0.60206
1.20412
1
1.14613
0.60206
0.60206
0.60206
2.65321
2.69723
2.67117
0.60206
0.60206
1.38021
0.60206
0.69897
0.60206
0.60206
1.76343
1.76343
2.20683
0.60206
0.60206
0.60206
1.66276
1
1.20412
1.85733
3.37931
0.60206
0.845098
1.85126
0.60206
0.60206
0.60206
1.34242
1.39794
0.60206
1.74036
0.60206
1.99123
0.60206
0.60206
0.60206
1.47712
1.34242
0.60206
0.60206
0.60206
0.60206
0.60206
0.60206
1.39794
1.70757
0.60206
0.60206
0.60206
0.60206
0.60206
0.60206
0.60206
1.27875
0.60206
0.60206
0.60206
1.27875
0.60206
0.60206
0.60206
0.60206
0.60206
0.69897
1.34242
0.60206
1.94448
0.60206
0.60206
1.11394
0.778151
1.44716
0.60206
1.78533
0.778151
1.11394
0.60206
0.60206
1.34242
0.60206
1.81291
1.25527
0.845098
0.60206
1.74036
0.60206
0.60206
0.60206
0.60206
0.60206
1.44716
1.53148
0.60206
0.69897
0.60206
0.60206
0.60206
1.5682
0.60206
0.60206
0.60206
0.60206
0.60206
0.60206
0.60206
0.60206
1.17609
1.25527
0.60206
3.0461
0.60206
1.43136
1.34242
0.60206
1.11394
0.69897
1.20412
0.60206
1.11394
0.60206
1.41497
0.60206
1.44716
0.60206
0.60206
1.20412
1.11394
0.60206
1.34242
0.60206
0.60206
0.60206
0.60206
0.60206
0.60206
0.60206
0.60206
1.27875
0.60206
0.60206
0.60206
0.845098
1.49136
0.60206
0.60206
1.25527
0.60206
0.60206
1.11394
0.778151
0.60206
0.60206
0.60206
1
1.66276
1.39794
0.60206
0.60206
0.69897
0.60206
0.60206
1.25527
1.74036
0.60206
0.60206
0.60206
1.39794
1.88081
0.60206
0.60206
0.60206
0.60206
0.60206
0.60206
1.34242
0.60206
0.60206
1
1.39794
1.74036
1.49136
0.60206
0.60206
0.60206
1.20412
1.53148
0.60206
1
0.60206
0.778151
0.60206
0.60206
1.44716
1.39794
1.5682
0.60206
0.60206
1.20412
0.60206
0.845098
1.54407
0.60206
3.39164
1.20412
2.35025
1.20412
0.60206
1.91908
0.60206
0.60206
2.33646
1.78533
1.04139
0.477121
0.60206
0.60206
0.60206
0.60206
0.60206
0.60206
0.60206
0.60206
1
0.60206
2.56703
0.60206
0.60206
0.60206
0.60206
1.91381
1.34242
0.60206
0.60206
1.36173
1.27875
0.60206
0.60206
0.60206
0.60206
1.11394
1.74036
0.60206
2.40654
0.60206
1.44716
0.845098
0.60206
1.60206
1.25527
0.778151
0.60206
0.60206
2.75891
0.60206
0.60206
1.27875
0.60206
0.60206
0.60206
0.60206
2.91487
3.60552
0.60206
1.91908
0.69897
1.60206
2.19312
2.06819
3.01536
0.60206
2.55751
1.86332
0.60206
0.60206
1.20412
0.778151
0.60206
0.60206
0.60206
0.60206
0.60206
0.60206
0.60206
0.60206
0.60206
0.69897
0.60206
1.5682
1.80618
0.60206
0.60206
0.60206
0.60206
0.60206
0.60206
0.60206
1.11394
0.60206
0.60206
0.60206
0.60206
1.78533
0.60206
1.34242
0.60206
0.60206
0.60206
0.60206
0.69897
0.60206
0.60206
0.60206
1.11394
0.69897
1.34242
0.60206
0.60206
1
1.49136
1.57978
0.60206
0.60206
0.60206
0.60206
0.60206
0.60206
0.60206
0.60206
0.60206
1.34242
1.07918
0.60206
1.39794
0.60206
0.60206
0.60206
0.845098
1.63347
1.11394
0.60206
1.27875
0.60206
0.60206
0.60206
2.3483
0.778151
1.62325
1.65321
0.60206
0.60206
2.43457
1.4624
0.60206
0.60206
0.60206
2.63347
0.60206
0.60206
1.27875
0.60206
1.36173
1.8451
0.60206
1.73239
1.68124
0.845098
0.60206
1
1.11394
0.60206
0.60206
1.54407
1.8451
0.60206
1.39794
0.60206
0.60206
1.20412
1.11394
0.69897
0.30103
0.60206
1.27875
1.20412
0.60206
0.845098
1
0.60206
0.845098
0.60206
0.60206
1.60206
0.60206
0.60206
0.60206
1.63347
0.60206
1.49136
0.778151
2.48001
3.27875
0.60206
1.34242
1.34242
0.60206
0.60206
0.60206
2.20952
1.25527
0.60206
0.60206
0.60206
1.34242
1
0.60206
1.27875
0.60206
0.60206
1.716
1.39794
0.60206
3.18355
0.778151
1.27875
0.60206
1.60206
1.98227
0.60206
1.68124
1.66276
0.60206
1.47712
0.60206
0.60206
1.47712
1.27875
0.60206
1.11394
1.92942
0.60206
0.60206
1.39794
0.60206
1.11394
2.1038
0.60206
0.60206
0.60206
1.44716
0.60206
1.76343
1.11394
1.49136
1.53148
0.60206
0.60206
2.02531
0.60206
1.04139
0.60206
0.60206
0.60206
1.44716
0.60206
1.5682
0.60206
0.60206
0.60206
0.845098
1.89763
0.60206
0.60206
0.60206
1.78533
0.60206
1.74036
0.60206
0.60206
0.60206
0.60206
1.60206
0.60206
0.60206
1.04139
1.07918
0.60206
0.60206
1.07918
0.60206
1.88081
0.60206
0.60206
0.60206
0.60206
1.11394
0.60206
0.60206
0.778151
1.88081
0.60206
0.60206
0.60206
1.5682
1.94448
0.60206
2.65418
1.20412
0.845098
0.69897
0.60206
0.60206
0.60206
1.83885
1.39794
0.60206
0.60206
1.82607
1.76343
1.94448
0.60206
1.60206
0.60206
0.90309
1.63347
0.60206
0.60206
3.45682
0.60206
0.60206
0.60206
1.76343
0.60206
0.60206
1.11394
0.60206
0.60206
0.60206
1.39794
0.60206
1.6902
2.06819
0.60206
0.60206
0.60206
0.60206
0.60206
1.04139
2.63949
0.60206
2.34044
0.60206
0.60206
0.60206
0.60206
0.60206
0.60206
0.60206
1
0.60206
1.20412
0.60206
1.32222
0.60206
1.07918
0.60206
0.60206
0.845098
0.778151
0.60206
0.60206
0.60206
3.22089
0.60206
1.38021
1.39794
1.34242
0.60206
0.60206
1.5682
0.60206
0.60206
0.60206
0.60206
1.63347
1
1.54407
0.60206
1.66276
0.60206
1
1.79239
1.49136
0.60206
0.60206
0.60206
0.60206
0.60206
0.60206
0.60206
0.60206
1.27875
0.60206
1.6721
0.60206
0.60206
1.6902
1.20412
0.60206
1.27875
0.60206
0.60206
0.60206
0.60206
1.27875
1.73239
1.20412
1.70757
1.5563
0.60206
0.60206
1.74036
0.60206
0.60206
0.60206
1.5563
0.60206
0.60206
1.23045
0.60206
1.34242
1.34242
0.60206
1.4624
0.60206
0.60206
0.60206
0.60206
1.60206
1.39794
1.39794
1.44716
0.60206
0.60206
0.60206
0.60206
0.60206
1
1.716
0.60206
1.96379
0.845098
1.89209
0.60206
2
0.60206
0.60206
0.60206
0.60206
0.60206
0.60206
1.99123
1.74036
2.78319
0.60206
1.27875
0.69897
0.845098
0.60206
0.60206
0.60206
0.60206
1.6721
0.60206
1
0.60206
0.60206
0.60206
0.60206
0.60206
0.60206
0.60206
1.74036
1.92428
1.38021
1.64345
0.60206
0.60206
0.60206
0.60206
0.60206
0.845098
0.778151
1.39794
1.44716
0.60206
0.60206
0.60206
0.60206
0.845098
0.60206
0.60206
0.60206
0.60206
0.60206
0.60206
0.69897
1.25527
1
0.845098
0.60206
0.60206
0.60206

## Sheet: A5
ctrl	ACs	ATCs	AOCs	tDASGs	oDASGs
2.36361	1.20412	1.20412	1.11394	1.5682	2.92788
1.97313	1.27875	1.27875	2.49136	1.27875	2.75511
1.11394	1.04139	1.04139	0.845098	1.20412	1.49136
2.06819	2.1959	2.1959	2.11394	1.5563	3.01787
2.16435	1.38021	1.38021	0.845098	1.14613	2.55871
0.69897	0.69897	0.69897	1.20412	1.27875	1.78533
1	0.845098	0.845098	0.845098		1.60206
1.82607	1.32222	1.32222	2.92788		2.54407
1.11394	1	1	2.75511		2.47276
1.65321	1.53148	1.53148	1.60206		2.3962
1.53148	1.94448	1.94448	1		1.20412
1.20412	1.32222	1.32222	1.61278		1.9345
0.845098	2.49969	2.49969	1.39794		2
1.716	1.34242	1.34242	1.11394		1.97772
1.74036	2.18184	2.18184	1.49136		1.34242
2.19033	2.09342	2.09342	0.845098		1.44716
1.11394	1.83251	1.83251	1.95904
2.49136	0.845098	0.845098	1.17609
1.11394	1.99123	1.99123	2.19866
1.49136	1.49136	1.49136	2.12385
2.15229	1.83251	1.83251	2.36736
1.60206	1.07918	1.07918	3.01787
1.86923	3.42127	3.42127	1.76343
1.14613	2.64542	2.64542	1.716
1.11394	1.11394	1.11394	3.14176
1.66276	1.60206	1.60206	1.95424
1.49136	1.60206	1.60206	0.69897
0.845098	0.69897	0.69897	1.87506
1.61278	1	1	1.89763
1.11394	1.80618	1.80618	2.79588
0.69897	1	1	1.11394
2.33244	1.5682	1.5682	1.27875
1.14613	2.32428	2.32428	1.93952
1.39794	2.68753	2.68753	1.14613
1.92942	1.60206	1.60206	1.60206
1.34242	1.27875	1.27875	2.35411
2.93298	1.20412	1.20412	1.34242
1.41497	1.89763	1.89763	1.11394
2.3784	1.5563	1.5563	1.90849
2.33041	1.34242	1.34242	2.26482
3.09656	1.14613	1.14613	1.66276
3.28421	1.6902	1.6902	0.845098
2.82995	1.11394	1.11394	2.55871
1.66276	1.11394	1.11394	1.78533
1.86332	2.02531	2.02531	1.78533
1.39794	0.69897	0.69897	1.60206
1.50515	0.845098	0.845098	1.34242
1	1.07918	1.07918	2.24304
1.97313	3.47943	3.47943	1.63347
0.954243	1	1	3.12385
1.88081	1.27875	1.27875	1.27875
0.845098	1.53148	1.53148	2.47276
1.34242	1.27875	1.27875	2.3962
1.27875	1.39794	1.39794	2.12385
1.20412	0.845098	0.845098	1.20412
1.49136	2.1038	2.1038	0.69897
1.74036	3.20602	3.20602	1.9345
1.76343	0.845098	0.845098	2.70842
1	2.19866	2.19866	1.27875
1.27875	1.27875	1.27875	1.53148
2.60746	1.49136	1.49136	2.77452
1.11394	1.11394		1.49136
1.98227	2.49136		1.5563
1	0.845098		2
2.58883	2.11394		1.04139
1.65321	0.845098		0.778151
1.74036	1.20412		2.03743
1.34242	0.845098		1.93952
1.04139	2.92788		1.97772
1.11394	2.75511		1.20412
1.27875	1.60206		2.29885
0.845098	1		1.43136
1.53148	1.61278		1.99123
1.27875	1.39794		1.53148
1.27875	1.11394		1.39794
0.69897	1.49136		1.47712
2.1959	0.845098		1.66276
1.20412	1.95904		1.34242
1.36173	1.17609		1.49136
0.69897	2.19866		1.5682
2.04922	2.12385		1.99123
1.38021	2.36736		1.6902
1.53148	3.01787		1.78533
1.39794	1.76343		1.60206
1.69897	1.716		0.69897
1.8451	3.14176		1.83885
1.5563	1.95424		0.778151
1.20412	0.69897		1.44716
1.20412	1.87506		0.845098
0.60206	1.89763		0.845098
1	2.79588		1.11394
1.5682	1.11394		0.845098
0.69897	1.27875		1.6902
0.845098	1.93952		1.5682
1.59106	1.14613		1.8451
1.6902	1.60206
1.25527	2.35411
1	1.34242
1.34242	1.11394
0.845098	1.90849
1.07918	2.26482
1.20412	1.66276
1.32222	0.845098
1	2.55871
0.845098	1.78533
1.76343	1.78533
1.44716	1.60206
0.845098	1.34242
1.44716	2.24304
1.6902	1.63347
0.845098	3.12385
1.14613	1.27875
1.49136	2.47276
1.79239	2.3962
1.50515	2.12385
2.4456	1.20412
2.75511	0.69897
1.60206	1.9345
1.07918	2.70842
0.845098	1.27875
1.11394	1.53148
0.845098	2.77452
1.14613	1.49136
1	1.5563
1	2
0.845098	1.04139
1.39794	0.778151
2.02531	2.03743
1.8451	1.93952
1	1.97772
1.04139	1.20412
1.11394	2.29885
1.11394	1.43136
1.77085	1.99123
1.716	1.53148
1.11394	1.39794
0.778151	1.47712
1.61278	1.66276
1.36173	1.34242
1.39794	1.49136
1.68124	1.5682
2.40654	1.99123
1.94448	1.6902
1.78533	1.78533
0.845098	1.60206
0.778151	0.69897
1.11394	1.83885
1.27875	0.778151
1.6902	1.44716
1.53148	0.845098
1.27875	0.845098
0.845098	1.11394
2.12385	0.845098
0.30103	1.6902
2.79518	1.5682
0.954243	1.8451
1.32222
1.85126
1.39794
2.21219
0.69897
1.49136
1.53148
0.845098
1.82607
0.69897
0.845098
1.94448
1.60206
1.32222
1.49136
1.57978
1.14613
1.36173
1.95904
1.82607
1
0.69897
1.11394
1.14613
1.17609
2.49969
1.17609
1.20412
0.69897
2.61172
1.07918
1.6902
1.60206
2.19866
1.27875
1.11394
1
2.31387
1.38021
0.845098
1.34242
1.38021
1
2.17026
2.12385
0.845098
1.89763
1.60206
2.4183
0.845098
1
1.88081
1.11394
1.20412
1.11394
2.93902
1.04139
1.30103
1.11394
1.36173
2.36736
1.91381
1.11394
1.6721
1.75587
1
2.18184
1.11394
1
2.62118
0.845098
1.66276
2.09342
1.11394
1.44716
1.66276
1.11394
1.5682
1.11394
1.83251
1.14613
1.44716
1
0.845098
1.76343
0.69897
2.41162
1.716
2.04532
3.14176
1.95424
1.07918
2.09691
1.11394
1.11394
1.49136
2.32222
1.96848
2.17609
1.76343
0.954243
1.27875
1.20412
0.69897
2.30963
1.11394
0.845098
1.44716
1.20412
1.87506
1.89763
0.845098
1.34242
0.69897
0.778151
1.99123
1.49136
1.63347
1.89763
1.14613
1.83251
2.79588
1.27875
0.845098
1
1.11394
0.845098
1.39794
1
1.07918
1.66276
1.11394
2.42488
1.80618
1.20412
1.07918
1.27875
1.34242
2.14301
1.53148
1.20412
3.42127
1.81954
2.64542
1.20412
1.11394
2.87332
1.27875
1
2.36173
2.34439
1.07918
1.69897
2.29226
2.20683
1.49136
0.954243
1
1.60206
1.81291
1.53148
1.11394
2.25768
1.07918
1.11394
1.41497
0.60206
1.07918
1.11394
1.11394
1.44716
0.90309
1.27875
2.27875
1.61278
0.69897
1.93952
1.5563
1.5563
1.49136
2.00432
0.69897
1.25527
1.14613
1.34242
1.43136
1.74036
1.5682
0.845098
1.20412
1.60206
1.20412
1.89209
1.6902
1.66276
0.845098
0.69897
1
1.80618
1
1.39794
0.845098
1.34242
1.60206
0.69897
3.08565
2.17026
2.35411
2.7679
1.34242
1.11394
2.45025
1.11394
2.73078
0.845098
1.34242
1.04139
0.69897
0.845098
2.04922
1.11394
0.845098
0.60206
0.69897
0.30103
1
1
1
0.69897
3.12385
2.44091
1.97313
1.97313
1
0.845098
1.80618
0.778151
2.95569
1.11394
0.845098
1.34242
0.954243
1.4624
2.30963
0.30103
1.97313
2.12385
1
2.08636
0.69897
2.09342
0.69897
1.39794
0.845098
1.20412
0.69897
1.11394
1.39794
1.90849
0.845098
1.27875
1.4624
1.07918
1.07918
1.14613
1.78533
1.11394
2.04139
1.20412
1.44716
1.76343
1.53148
1.80618
1.49136
1.44716
1.27875
1.20412
1.63347
0.60206
1.04139
2.04139
1.94448
2.01703
0.845098
0.845098
2.26482
1.66276
2.5172
0.60206
1.92942
2.31597
2.10721
2.24551
1.4624
0.69897
1.20412
1.07918
0.778151
1.04139
2.15229
0.845098
0.845098
1.20412
1.39794
2.82543
0.845098
1.53148
1.63347
0.845098
1.11394
0.845098
2.21484
1.5682
0.69897
1.83251
1.80618
1.39794
1.14613
2.20412
1.27875
1
2.13672
1.20412
1
1.34242
0.69897
1.62325
2.32428
1.11394
0.60206
1
1
2.06819
2.10721
1
1.11394
1.89209
1.39794
1.44716
1.92428
2.68753
2.34242
2.36173
1.04139
2.15229
2.54283
1.11394
2.08279
3.17638
1.07918
1.11394
0.845098
0.69897
1.81954
1.53148
1.30103
1.78533
1.82607
0.845098
1
1.49136
3.25792
1.99564
1.20412
2.65992
2.6721
1.14613
0.845098
1
1.34242
1.78533
0.845098
0.69897
0.954243
1
1.11394
1.20412
1.34242
0.845098
0.845098
2.13033
0.845098
0.69897
1.63347
3.12385
1.60206
1.27875
1.44716
1
1.8451
1.6902
2.02531
2.08279
1.5563
3.20737
1
0.778151
1.44716
3.18498
2.12385
1.82607
0.60206
1.27875
1.20412
1.20412
1.89763
1.49136
2.15229
1.11394
1.53148
0.69897
1.98227
1.90309
1.27875
0.954243
1.11394
1.6721
1.20412
0.69897
1.11394
0.69897
0.60206
1.20412
1.27875
1.39794
1.9345
1
1.69897
1.53148
1.20412
1.60206
1.63347
1.27875
0.69897
1.23045
1.716
2.70842
1
1.75587
1
1.82607
1.53148
1.34242
0.69897
0.69897
1.49136
0.954243
1.6902
1.34242
1.92428
1.11394
2.74351
2.74974
0.954243
0.778151
1
1.27875
0.845098
1.11394
1.11394
1.11394
1.11394
3.11093
3.2971
2.84011
1.34242
1
1
1.74819
0.60206
1.39794
1.11394
1.27875
2.13033
1.50515
1
1.53148
2.77452
1.49136
1.07918
1.60206
1.5563
1.90309
1.11394
1.11394
1
1.91381
1.76343
0.845098
1.60206
0.69897
1.44716
0.69897
1.11394
1.78533
1.76343
0.69897
0.69897
1.51851
1.17609
3.23629
1.17609
1
1.50515
1.39794
3.63508
1.75587
1.04139
0.778151
2.33646
2.4609
1.86332
2.16137
1.86332
1.6902
1.43136
1.07918
1
1.39794
1.34242
1.11394
1.27875
1.66276
1
1
1.63347
2.03743
1.04139
1.14613
2.12385
2.07918
1.80618
1.39794
0.845098
1.90309
0.954243
1.5682
1.20412
1
1.5682
1.34242
1.75587
2.26482
1.93952
1
1.60206
1.53148
1.74036
1.60206
0.845098
0.845098
0.845098
1.11394
0.845098
1.39794
0.845098
1.91381
0.845098
1.41497
1.75587
1.44716
1.20412
1.44716
1.716
1.44716
2.29885
1.25527
1.34242
1.49136
1.34242
1.20412
1.86923
1.6721
1.43136
1.99123
1.20412
1.44716
1.44716
2.35025
1.53148
1.716
1.39794
1.6902
0.845098
2.02531
0.845098
2.04532
2.04532
0.845098
2.30535
1
1.85733
1.39794
2.32838
0.69897
1.53148
1.47712
2.70157
2.70927
2.89708
1
1.11394
1.66276
1.34242
0.69897
1.11394
2.92428
1.49136
1.66276
0.778151
1.14613
1.5682
1.25527
1.716
1.27875
1.6902
0.845098
1.59106
1.23045
1.63347
1.82607
1.17609
1.99123
1.6902
1.74036
2.33646
0.60206
1
1.74036
1.34242
1.78533
1.60206
1.25527
1.49136
3.47943
2.19033
1.66276
1.80618
1.6902
0.60206
1.32222
0.69897
1.89763
0.69897
2.55145
2.42325
0.845098
0.69897
1.17609
1.97313
2.08636
1.38021
1.41497
2.26951
1.86923
0.69897
0.845098
1
1.14613
1.11394
1.11394
0.845098
0.69897
1.54407
0.60206
1.36173
1.11394
1
0.778151
1.11394
1.20412
1.20412
1
2.27416
1.49136
1.80618
1
1.11394
0.69897
1.44716
0.845098
2.0607
1.53148
1
1.27875
1.83885
0.778151
1.11394
2.01284
1.87506
1.41497
1.39794
1.49136
1.53148
0.845098
0.845098
2.1038
1.07918
0.954243
3.20602
1.5682
1.11394
2.03743
0.778151
1.60206
0.845098
1.11394
0.845098
1.23045
1.20412
1.6902
2.19866
1.54407
1.716
0.845098
2.20412
1.39794
1.11394
1.5682
0.60206
1.20412
2.26951
1.11394
1.41497
1.8451
1.23045
1.80618
1.62325
1.85126
2.38561
1.61278
1.30103
1.27875
1.49136
1.11394
1.6902
1.11394

## Sheet: RI
ctrl	ACs	ATCs	AOCs	tDASGs	oDASGs
2.2878	2.6149	2.66276	2.6149	2.40654	2.02938
2.03743	1.75587	2.79169	1.75587	2.04922	1.96848
2.03743	2.12385	2.40654	2.12385	2.26717	2.06446
2.12057	1.53148	1.75587	1.53148
1.89763	2.02938	2.15534	2.02938
1.89763	1.96848	1.85126	1.96848
2.66276	1.95424	1.90849	1.95424
2.79169	2.06446	2.27416	2.06446
2.49136	2	2.04922	2
2.14613	2.03342	2.02119	2.03342
2.55871	3.36418	2.73799	3.36418
1.5682	3.37033	3.0667	3.37033
1.74036	2.26245	1.89763	2.26245
1.99564	2.27646	1.95904	2.27646
2.45939	2.08636	2.03743	2.08636
2.11394	1.99123	2.44716	1.99123
1.5682	1.73239	1.63347	1.73239
2.53529	1.92942	2.08991	1.92942
2.53529	2.50243	2.0569	2.50243
2.14613	3.62201	2.05308	3.62201
2.53529	2.17319	2.6981	2.17319
2.89982	2.72591	2.27646	2.72591
2.50106	1.64345	1.88649	1.64345
2.46538	2.13988	2.01284	2.13988
1.89763	1.90309	2.89982	1.90309
1.78533	1.96379	2.11394	1.96379
1.99564	1.9345	1.94448	1.9345
2.00432	1.50515	3.2388	1.50515
3.30471	1.5682	2.24055	1.5682
2.53908	2.72181	1.91381	2.72181
2.88423	2.66276	1.9345
2.6149	2.79169	1.97313
2.83251	2.40654	2.04922
3.03503	1.75587	1.98677
2.50786	2.15534	3.17289
3.07225	1.85126	2.51055
1.94448	1.90849	2.63347
1.75587	2.27416	2.37107
1.90849	2.04922	1.86332
1.88081	2.02119	2.26717
2.38202	2.73799	1.94448
1.92942	3.0667	2.41996
2.15534	1.89763	1.5682
2.5092	1.95904	2.03342
1.91381	2.03743
1.89763	2.44716
1.82607	1.63347
2.12385	2.08991
1.88081	2.0569
3.00561	2.05308
2.06446	2.6981
1.85126	2.27646
1.89763	1.88649
1.89763	2.01284
2.19866	2.89982
1.88081	2.11394
1.86332	1.94448
2.38917	3.2388
1.92942	2.24055
2.73957	1.91381
2.12385	1.9345
1.53148	1.97313
1.89209	2.04922
1.89763	1.98677
1.8451	3.17289
1.94448	2.51055
2.32428	2.63347
2.89154	2.37107
1.88081	1.86332
1.90849	2.26717
2.27416	1.94448
1.54407	2.41996
2.13354	1.5682
1.95424	2.03342
2.82543
1.66276
2.11059
2.42325
2.18184
1.96379
2.53908
2.54283
2.45939
2.04922
2.02119
2.03743
1.86923
2.47567
1.95424
1.91908
1.79934
1.89763
1.88081
1.95424
1.96379
3.32056
2.4133
1.98677
1.63347
2.01284
2.00432
1.96379
2.35218
1.91381
2.01703
1.92942
2.85733
1.92942
2.01703
1.92942
1.92942
2.33244
2.11394
1.91381
1.93952
1.91381
1.89763
2.17026
1.76343
2.09342
2.09342
2.73799
3.28285
2.56937
1.89763
2
2.18752
2.11059
2.03342
2.08636
2.53656
2.95182
3.0667
1.89763
2.15229
1.88081
1.80618
1.95904
2.08991
2.16732
2.5955
3.30514
1.98227
3.16879
2.03743
1.97313
2.2833
2.29003
1.6721
1.51851
2.13354
1.93952
1.88081
2.44716
3.01284
2.89763
2.89763
1.88081
3.04999
2.0607
3.36418
3.37033
2.07918
2.03743
1.88081
1.63347
1.94939
2.13033
2.08991
2.0569
1.81291
2
1.88649
1.86332
1.91381
1.9345
1.94939
1.92942
1.88081
1.89763
2.05308
2.6981
2.26245
2.11727
2.18752
2.16137
2.07918
1.66276
2.27646
2.21484
1.88649
2.12385
2.10721
2.38917
1.89209
1.86923
2.01284
2.57864
1.80618
1.98227
2.26482
2.10037
1.97772
1.94448
1.82607
2.49969
1.91381
1.89763
2.2878
2.11727
1.90309
2.08636
1.91908
2.78176
2.02531
1.89209
1.95904
0.477121
2.1959
2.48287
2.59879
2.66839
2.89982
1.9345
2.11394
2.07188
2.00432
2.04922
2.37291
2.28556
2.17026
2.04922
1.49136
1.90849
1.80618
2.08991
2.15836
2.22789
1.88081
1.94448
2.00432
2.38382
1.8451
2.33244
1.92942
1.82607
3.2388
3.22063
2.233
1.98227
1.88649
2.24055
1.89763
1.85126
1.74036
2.0607
1.95904
1.9345
2.1271
2.26245
1.89763
1.99123
1.98677
1.94939
1.73239
2.61384
1.92942
2.22011
1.91381
1.9345
1.97313
2.1959
1.91381
1.98677
2.03743
2.29447
3.2615
1.89763
2.12057
1.87506
1.97772
3.37254
2.96802
3.17289
1.99123
1.90309
2.20952
1.49136
2.32838
3.17026
1.85733
1.92942
3.22814
2.0086
1.94448
1.92942
3.19866
2.51055
2.52114
2.50243
2.37658
1.78533
3.20303
3.38328
3.62201
2.1959
2.23045
2.63347
1.86332
2.7007
1.86332
2.58546
2.17319
1.64345
1.88081
2.15836
2.31597
1.90849
2.37107
2.13988
1.86332
1.90309
2.90526
1.91381
2.16137
2.76418
2.3032
2.57864
2.30535
2.64738
2.38561
2.36922
1.89209
2.08279
2
2.22011
2.80618
2.01284
2.18184
1.96379
2.04922
1.51851
1.5563
2.19312
2.52375
2.37475
1.86332
1.94448
3.49066
2.46982
1.86332
2.01703
3.2465
2.57864
1.9345
1.61278
2.14922
1.86332
2.82995
2.24304
2.22272
2.55751
3.16879
2.41996
1.97313
2.38202
2.49136
1.86332
2.35025
2.3962
1.94448
1.89763
1.5682
1.50515
1.98677
1.60206
1.78533
2.03743
1.98227
1.5682
1.49136
2.72181
3.37949
3.1186
1.94448
1.94448
1.89763
1.53148
2.08991
2.03342
1.86332
2.17319
1.97772
1.85733
1.53148

## Sheet: summary
	A3	A5	RI	SE
ctrl	0.9946	1.467	2.182	2.025
ACs	1.197	1.626	2.2	1.949
ATCs	1.066	1.556	2.222	1.961
AOCs	1.28	1.67	2.183	1.93
tDASGs	3.19	1.33	2.24	1.904
oDASGs	1.68	2.09	2.02	1.897
