# Supplementary material for: Comprehensive Transcriptome Analysis Reveals Sex-Specific Alternative Splicing Events in Zebrafish Gonads
Source: Life (Basel). 2022 Sep 16;12(9):1441. doi: 10.3390/life12091441 (PMC9501657; doi:10.3390/life12091441)
Supplement: Supplementary file 1 [file life-12-01441-s001.zip › Table S8.xlsx]

## Sheet: gDASGs_PSI
gene_id	brain	gut	heart	kidney	liver	muscle	spleen	ovary	testis
add1	0.00933333	0.483333	0.048	0.391667	0.589667	0.201333	0.252	0.9634	0.0477
anln	0.0176667	0.0866667	0.283333	0.278	0.666667	0.373667	0.542667	0.6185	0.132
apoda.2	0	0	0	0.125	0.093	0.146	0	0.3044	0.209
arhgap12a	0.982333	0.894667	0.589	0.880333	1	0.813333	0.685667	0.9425	0.3789
arrb2a	0.216	0	0.299667	0.0163333	0	0.174	0.108	0.5209	0.0317
brd8	0.573333	0.658	0.602	0.441333	0.828667	0.586	0.447333	0.9364	0.8051
cast	0.606	0.275667	0.782333	0.514333	0.243333	0.265	0.294	0.8445	0.2711
cenpe	0	0.00766667	0.15	0.055	0.168	0.0833333	0.339	0.942	0.0032
ckap5	0	0.00733333	0.00733333	0.0443333	0.0963333	0.0656667	0.0676667	0.6846	0.005
clk4a	0.29	0.480333	0.407	0.647667	0.464333	0.510667	0.54	0.9905	0.3527
clk4b	0.308667	0.763	0.54	0.739333	1	0.424	0.566667	0.9717	0.5811
ctnnd1	0.837333	0.0816667	0.415333	0.285	0.0186667	0.476667	0.295333	0.9458	0.335
dab2	0.028	0.007	0.124333	0.0243333	0.670667	0.182	0.406	0.9815	0.3816
ddx4	0	0	1	0.396	0.5	0.232	0.757	0.7038	0.0121
dmd	0.847667	0.897667	1	0.874333	1	0.907667	0.841667	0.8887	0.7548
dnm2a	0.757333	0.796333	0.576333	0.663667	0.512	0.427333	0.515	0.5102	0.1198
ect2	0.0176667	0.00666667	0.098	0.196667	0.333333	0.107667	0.389	0.9478	0.0617
eef1db	0.107	0.00566667	0.121	0.00533333	0.00766667	0.230333	0.00766667	0.3612	0.0052
eml3	0.807333	0.831667	0.814667	0.792333	1	0.890333	0.720333	0.8909	0.1302
ewsr1b	0.914	0.942333	0.927	0.951	0.958	0.939	0.929333	0.992	0.8064
fgfr1op	0.172	0.106667	0.137	0.216667	0.0326667	0.179667	0.076	0.54	0.0873
foxm1	1	0.950333	1	0.902667	1	1	1	0.9928	0.2402
hnrnpm	0.416333	0.936667	0.848	0.969	0.963667	0.749	0.971333	0.9924	0.9093
immt	0.571	0.0906667	0.775333	0.497	0.448	0.717667	0.645333	0.9196	0.3276
incenp	0.872333	0.482667	0.698333	0.752667	0.477333	0.781333	0.945333	0.9897	0.1707
kif2c	0.109667	0.785667	0.183667	0.175667	0.922	0.242333	0.570333	0.9836	0.108
ktn1	0.183	0.344333	0.722667	0.414333	0.460667	0.222667	0.364	0.9746	0.2433
LOC108191695	1	0	0.863	0.5	0	0	0.8595	0.9355	0.5395
lpar2b	0.301333	0.808667	0.467	0.718333	0.96	0.455333	0.867333	0.9489	0.1038
map7d1a	0.667667	0.789333	0.0713333	0.323667	0.811667	0.118	0.579667	0.9878	0.5142
mapre1a	0	0.011	0.019	0.0153333	0.209	0.104	0.0583333	0.9945	0.001
mapre1b	0.0763333	0.0666667	0.356333	0.135667	0.153333	0.195333	0.395333	0.7144	0.0643
mark2a	0.0586667	0.421333	0.109667	0.182667	0.635667	0.254333	0.186667	0.957	0.148
marveld2a	0.260667	0.528667	0.0603333	0.276	0.866	0.159333	0.379667	0.9593	0.0716
mgea5	0.914667	0.787333	0.877	0.851667	0.883333	0.925333	0.774	0.9795	0.844
mia3	0	0.0103333	0.203333	0.0723333	0.0556667	0.243	0.0103333	0.9814	0.0088
mibp	0.967333	0.927667	0.982	0.972667	0.983667	0.976667	0.980333	0.9644	0.7729
mllt10	0.751333	0.00766667	0.281667	0.0216667	0	0.148667	0.07	0.7199	0.1476
mprip	0.171667	0.299667	0.443333	0.188	0.151	0.401333	0.261667	0.711	0.1123
myef2	0.836333	0.940333	0.897667	0.951333	0.985	0.943333	0.941	0.9964	0.751
myo6a	0.0866667	0.915	0.258	0.953	0.703333	0.409	0.633667	0.7247	0.2908
nasp	0.0156667	0.119667	0.0296667	0.306	0.568	0.306333	0.590667	0.8009	0.0677
ncoa5	0.114	0.349333	0.388333	0.309	0.587	0.38	0.520667	0.9504	0.3326
ndc1	0.905667	0.842	0.801667	0.481	0.943	0.582667	0.655333	0.9897	0.2545
ndufv3	0.068	0.179667	0.210333	0.317333	0.275	0.0906667	0.225	0.7393	0.2364
nfyc	0.446333	0.118333	0.190667	0.188333	0.235	0.197667	0.199	0.9527	0.5864
numa1	0.088	0.193333	0	0.211667	1	0	0.435333	0.986	0.0024
ogt.1	0.005	0.294	0.0293333	0.165333	0.376	0.037	0.139667	0.785	0.1246
ralgapa1	0.188667	0.266333	0.666667	0.108333	0	0.409	0.391333	0.6506	0.0908
rapgef2	0.936667	0.758667	0.891333	0.434667	0.353333	0.800667	0.458667	0.881	0.6601
rbm4.1	0.612333	0.679333	0.537667	0.540333	1	0.581667	0.526	0.8307	0.4344
rbm5	0.401	0.617333	0.384667	0.462333	0.509333	0.499667	0.509333	0.9969	0.7027
rca2.1	0.008	0.261	0.0483333	0.134667	0.129	0.0826667	0.0836667	0.8786	0.0417
rrbp1a	0.673333	0.199667	0.852333	0.542667	0.338667	0.819	0.742	0.8318	0.1574
2022-09-06	0.0456667	0.664667	0.307333	0.636667	0.931	0.325333	0.460333	0.352	0.1421
sept7a	0.115333	0.542667	0.175667	0.594	0.753333	0.438667	0.576667	0.9633	0.2834
sept7b	0.246	0.775667	0.257333	0.783	0.75	0.464	0.532667	0.9755	0.0589
sf1	0.838333	0.906333	0.834667	0.914667	0.815	0.867667	0.874333	0.9838	0.7971
si:ch211-140m22.7	0.028	0.068	0.204667	0.0656667	0.078	0.05	0.203	0.9694	0.0945
si:ch211-140m22.8	0.0693333	0.280667	0.728333	0.261667	1	0.171333	0.513667	0.9724	0.2218
si:ch211-140m22.9	0.727667	0.855667	0.922333	0.83	1	0.820667	0.840333	0.9501	0.8115
si:ch211-197h24.6	0.842667	0.954333	0.79	0.873333	0.953	0.804667	0.842	0.9903	0.7816
si:ch73-103b11.2	0.904	0.0733333	0.247	0.0926667	0.0273333	0.0916667	0.0923333	0.9921	0.0844
slmapa	0.659	0.980333	0.46	0.950667	1	0.956	0.988	1	0.5997
smap1	0.847667	0.0403333	0.302	0.0493333	0.00566667	0.197667	0.0893333	0.789	0.2083
snrpa1	0.837667	0.909667	0.927667	0.941667	0.932	0.969	0.882667	0.9689	0.8216
thoc5	0	0.004	0.0223333	0.077	0.0686667	0.211333	0.130667	0.9146	0.4827
tpd52l2b	0.302	0.296	0.909	0.815333	0.295667	0.738667	0.951	0.9498	0.0826
tpm1	0.0183333	0.0386667	0.009	0.237667	0.191	0.009	0.0283333	0.9621	0.3835
tpx2	0	0.0116667	0.153333	0.137	0.856667	0.277333	0.534333	0.9842	0.0199
u2af2b	0.290333	0.993667	0.706	0.96	0.940333	0.864	0.887	0.9772	0.7116
ubap2l	0.485	0.0916667	0.0713333	0.0766667	0.0873333	0.0793333	0.0426667	0.4984	0.3211
usf2	0.677	0.850667	0.86	0.874333	1	0.675	0.840333	0.955	0.7379
wdr62	0.0823333	0.0126667	0.0233333	0.164667	0.0226667	0.154667	0.252667	0.9004	0.0164
yy1b	0.448	0.255667	0.412	0.401	0.245333	0.346	0.474667	0.9982	0.199
zgc:55582	0.416333	0.381	0.648333	0.211	0.666667	0.582333	0.202	0.8007	0.2023
zgc:92287	0.0716667	1	0.5	0.666667	1	0.192	1	0.9975	0.41
zgc:92288	0	0.705	0.552	0.345	0.451	0.43	0.485	0.6235	0.0142
znf451	0.0736667	0.177667	0.297	0.407	0.269	0.29	0.294667	0.9831	0.6129
abi2b	0.983	0.805333	0.928333	0.794333	0.930333	0.824333	0.740333	0.2102	0.6609
bcor	0.422333	0.725667	0.552667	0.648667	0.187	0.676	0.448667	0.4562	0.7497
bub1	1	1	1	0.897667	0.666667	0.923333	0.56	0.698	0.9977
cdc7	1	1	0.792667	0.811	1	1	0.536	0.6341	0.9976
col4a3bpb	0.231667	0.0603333	0.401	0.175333	0.134667	0.227	0.270333	0.0552	0.4947
dlg1l	0.414333	0.606667	1	0.861	0.932	0.867667	0.877333	0.1624	0.4286
ehbp1	0.796667	0.473667	0.015	0.478	0.414667	0.0903333	0.438	0.5162	0.917
epn1	0.127	0.830333	0.154333	0.611333	0.875333	0.417667	0.507333	0.1845	0.7513
ino80e	0.340667	0.961333	0.962	0.962	0.776333	0.941	0.928667	0.275	0.9945
LOC100000713	0.729	0.686	0.979	0.912667	0.867	1	0.874333	0.3519	0.7462
luc7l	0.186	0.133	0.178	0.112	0.14	0.185	0.190667	0.0598	0.3846
mak	0.022	0.385333	0.152667	0.333667	0.5	0.263667	0.227	0.9663	0.5231
max	0.445	0.564333	0.370667	0.401333	0.504667	0.434	0.405333	0.2621	0.4967
nsmce1	0.877333	0.876	0.85	0.892	0.856	0.847333	0.892	0.7048	0.9128
nup58	0.553667	0.315333	0.452667	0.460667	0.359667	0.692333	0.411667	0.2053	0.3705
rab12	0.065	0.174667	0.031	0.128667	0.153667	0.023	0.0183333	0.0213	0.2179
rab6a	0.047	0.215	0.447	0.173667	0.199	0.281667	0.21	0.0239	0.3595
rbm39a	0.283667	0.300333	0.329333	0.418667	0.425667	0.303	0.448	0.0343	0.4582
rsrp1	0.928	0.638	0.688333	0.661667	0.496	0.866	0.497	0.114	0.3782
srrm1	0.368333	0.177333	0.193	0.192	0.08	0.203667	0.187667	0.0136	0.1875
tp53bp1	0.758667	0.226667	0.196	0.175333	0.0316667	0.328333	0.088	0.0572	0.3926
u2surp	0.929667	0.756667	0.871	0.785333	0.666333	0.865667	0.692333	0.2662	0.5246
vps29	0.026	0.479333	0.0926667	0.190667	0.508	0.319	0.153	0.0097	0.4772

## Sheet: Ovary special upregulation
gene_id	brain	gut	heart	kidney	liver	muscle	spleen	ovary	testis
add1	0.00933333	0.483333	0.048	0.391667	0.589667	0.201333	0.252	0.9634	0.0477
cenpe	0	0.00766667	0.15	0.055	0.168	0.0833333	0.339	0.942	0.0032
ckap5	0	0.00733333	0.00733333	0.0443333	0.0963333	0.0656667	0.0676667	0.6846	0.005
clk4a	0.29	0.480333	0.407	0.647667	0.464333	0.510667	0.54	0.9905	0.3527
dab2	0.028	0.007	0.124333	0.0243333	0.670667	0.182	0.406	0.9815	0.3816
ect2	0.0176667	0.00666667	0.098	0.196667	0.333333	0.107667	0.389	0.9478	0.0617
fgfr1op	0.172	0.106667	0.137	0.216667	0.0326667	0.179667	0.076	0.54	0.0873
mapre1a	0	0.011	0.019	0.0153333	0.209	0.104	0.0583333	0.9945	0.001
mapre1b	0.0763333	0.0666667	0.356333	0.135667	0.153333	0.195333	0.395333	0.7144	0.0643
mark2a	0.0586667	0.421333	0.109667	0.182667	0.635667	0.254333	0.186667	0.957	0.148
mia3	0	0.0103333	0.203333	0.0723333	0.0556667	0.243	0.0103333	0.9814	0.0088
ncoa5	0.114	0.349333	0.388333	0.309	0.587	0.38	0.520667	0.9504	0.3326
ndufv3	0.068	0.179667	0.210333	0.317333	0.275	0.0906667	0.225	0.7393	0.2364
nfyc	0.446333	0.118333	0.190667	0.188333	0.235	0.197667	0.199	0.9527	0.5864
ogt.1	0.005	0.294	0.0293333	0.165333	0.376	0.037	0.139667	0.785	0.1246
rca2.1	0.008	0.261	0.0483333	0.134667	0.129	0.0826667	0.0836667	0.8786	0.0417
si:ch211-140m22.7	0.028	0.068	0.204667	0.0656667	0.078	0.05	0.203	0.9694	0.0945
thoc5	0	0.004	0.0223333	0.077	0.0686667	0.211333	0.130667	0.9146	0.4827
tpm1	0.0183333	0.0386667	0.009	0.237667	0.191	0.009	0.0283333	0.9621	0.3835
wdr62	0.0823333	0.0126667	0.0233333	0.164667	0.0226667	0.154667	0.252667	0.9004	0.0164
yy1b	0.448	0.255667	0.412	0.401	0.245333	0.346	0.474667	0.9982	0.199
znf451	0.0736667	0.177667	0.297	0.407	0.269	0.29	0.294667	0.9831	0.6129
mak	0.022	0.385333	0.152667	0.333667	0.5	0.263667	0.227	0.9663	0.5231

## Sheet: Ovary special downregulation
gene_id	brain	gut	heart	kidney	liver	muscle	spleen	ovary	testis
abi2b	0.983	0.805333	0.928333	0.794333	0.930333	0.824333	0.740333	0.2102	0.6609
LOC100000713	0.729	0.686	0.979	0.912667	0.867	1	0.874333	0.3519	0.7462

## Sheet: Testis special downregulation
gene_id	brain	gut	heart	kidney	liver	muscle	spleen	ovary	testis
dnm2a	0.757333	0.796333	0.576333	0.663667	0.512	0.427333	0.515	0.5102	0.1198
eml3	0.807333	0.831667	0.814667	0.792333	1	0.890333	0.720333	0.8909	0.1302
foxm1	1	0.950333	1	0.902667	1	1	1	0.9928	0.2402
incenp	0.872333	0.482667	0.698333	0.752667	0.477333	0.781333	0.945333	0.9897	0.1707
