# Supplementary material for: Comprehensive Transcriptome Analysis Reveals Sex-Specific Alternative Splicing Events in Zebrafish Gonads
Source: Life (Basel). 2022 Sep 16;12(9):1441. doi: 10.3390/life12091441 (PMC9501657; doi:10.3390/life12091441)
Supplement: Supplementary file 1 [file life-12-01441-s001.zip › Table S9.xlsx]

## Sheet: Sheet1
Overlap of gDASGs and gDEGs
gene_name	GSE142352	GSE142355	GSE111882	DEGs classification	ΔPSI	AS type
dmd	2.47	2.25	2.55	testis-upregulated DEGs	0.134	testis ES
mak	2.11	2.19	2.86	testis-upregulated DEGs	0.443	testis ES
dab2	-5.51	-2.49	-4.11	ovary-upregulated DEGs	0.6	testis ES
ect2	-2.97	-2.67	-2.23	ovary-upregulated DEGs	0.886	testis ES
